# Supplementary material for: The Regulation Network of Glycerolipid Metabolism as Coregulators of Immunotherapy-Related Myocarditis
Source: Hindawi journal article supplement (doi:10.1155/2023/8774971), 2023-06-21
Supplement: f1 [file 8774971.f1.pdf]

| p_val     | avg_log2FC | pct.1 | pct.2 | p_val_adj | cluster | gene    |
|-----------|------------|-------|-------|-----------|---------|---------|
| 0         | 2.70127338 | 0.874 | 0.137 | 0         | T cells | Cd3e    |
| 0         | 2.65888103 | 0.899 | 0.171 | 0         | T cells | Cd3g    |
| 0         | 2.61877584 | 0.704 | 0.136 | 0         | T cells | Cd8b1   |
| 0         | 2.53100975 | 0.858 | 0.145 | 0         | T cells | Cd3d    |
| 0         | 2.35433966 | 0.64  | 0.12  | 0         | T cells | Cd8a    |
| 0         | 2.29923125 | 0.854 | 0.218 | 0         | T cells | Ms4a4b  |
| 0         | 2.16582599 | 0.792 | 0.273 | 0         | T cells | Nkg7    |
| 0         | 2.16476056 | 0.752 | 0.13  | 0         | T cells | Lat     |
| 0         | 2.06853317 | 0.549 | 0.114 | 0         | T cells | Pdcd1   |
| 0         | 2.05081972 | 0.476 | 0.097 | 0         | T cells | Ctla4   |
| 0         | 1.93059767 | 0.551 | 0.103 | 0         | T cells | Icos    |
| 0         | 1.9282886  | 0.668 | 0.123 | 0         | T cells | Thy1    |
| 0         | 1.80536229 | 0.527 | 0.127 | 0         | T cells | Tigit   |
| 0         | 1.79439942 | 0.548 | 0.093 | 0         | T cells | Itk     |
| 0         | 1.72900147 | 0.642 | 0.137 | 0         | T cells | Lck     |
| 0         | 1.63843067 | 0.619 | 0.181 | 0         | T cells | Sh2d2a  |
| 0         | 1.63720695 | 0.506 | 0.089 | 0         | T cells | Cd28    |
| 0         | 1.49111725 | 0.473 | 0.092 | 0         | T cells | Cd27    |
| 0         | 1.43613713 | 0.53  | 0.102 | 0         | T cells | Skap1   |
| 0         | 1.39169424 | 0.455 | 0.086 | 0         | T cells | Cd247   |
| 0         | 1.35115002 | 0.597 | 0.161 | 0         | T cells | Ctsw    |
| 0         | -1.6093344 | 0.879 | 0.966 | 0         | T cells | Ftl1    |
| 0         | -1.7129101 | 0.918 | 0.98  | 0         | T cells | Fth1    |
| 0         | -1.7850353 | 0.062 | 0.502 | 0         | T cells | Lyn     |
| 0         | -1.9068328 | 0.074 | 0.508 | 0         | T cells | Unc93b1 |
| 0         | -2.0911416 | 0.058 | 0.484 | 0         | T cells | Spi1    |
| 0         | -2.1156899 | 0.522 | 0.779 | 0         | T cells | Gpx1    |
| 0         | -2.1656671 | 0.389 | 0.749 | 0         | T cells | Zfp36   |
| 0         | -3.1595077 | 0.152 | 0.694 | 0         | T cells | H2-Ab1  |
| 0         | -3.1650783 | 0.13  | 0.596 | 0         | T cells | Fcer1g  |
| 0         | -3.2739869 | 0.171 | 0.699 | 0         | T cells | H2-Eb1  |
| 0         | -3.5753473 | 0.174 | 0.705 | 0         | T cells | H2-Aa   |
| 0         | -3.6035632 | 0.106 | 0.634 | 0         | T cells | Tyrobp  |
| 0         | -3.9889944 | 0.333 | 0.826 | 0         | T cells | Cd74    |
| 1.05E-304 | 0.79318901 | 0.981 | 0.897 | 1.49E-300 | T cells | Rpsa    |
| 1.14E-302 | -1.8116726 | 0.055 | 0.464 | 1.61E-298 | T cells | Ctsh    |
| 8.32E-301 | -2.1425784 | 0.048 | 0.455 | 1.18E-296 | T cells | Cd83    |
| 1.30E-290 | 1.92077245 | 0.442 | 0.093 | 1.84E-286 | T cells | Lag3    |
| 4.96E-290 | -1.191875  | 0.803 | 0.896 | 7.02E-286 | T cells | H3f3a   |
| 1.64E-286 | -1.7902591 | 0.056 | 0.453 | 2.32E-282 | T cells | Ly86    |
| 4.91E-286 | 2.19569897 | 0.76  | 0.437 | 6.95E-282 | T cells | Ccl5    |
| 2.99E-285 | -1.8054352 | 0.073 | 0.474 | 4.24E-281 | T cells | Napsa   |
| 5.48E-285 | -2.8333906 | 0.06  | 0.452 | 7.76E-281 | T cells | Alox5ap |
| 6.60E-282 | 1.57655764 | 0.517 | 0.143 | 9.34E-278 | T cells | Cst7    |
| 1.12E-281 | 1.33520347 | 0.791 | 0.439 | 1.59E-277 | T cells | H2-Q7   |
| 3.04E-277 | -3.1033558 | 0.069 | 0.453 | 4.30E-273 | T cells | Ifitm2  |
| 2.09E-274 | -4.1057774 | 0.11  | 0.491 | 2.96E-270 | T cells | Lyz2    |

|           |            |       |       |           |         |          |
|-----------|------------|-------|-------|-----------|---------|----------|
| 2.21E-274 | -1.619268  | 0.025 | 0.399 | 3.13E-270 | T cells | Syk      |
| 5.54E-271 | 1.44803838 | 0.481 | 0.125 | 7.85E-267 | T cells | Tnfrsf18 |
| 2.16E-266 | -3.5810168 | 0.018 | 0.379 | 3.05E-262 | T cells | Cd79a    |
| 1.30E-263 | -1.8525543 | 0.03  | 0.394 | 1.83E-259 | T cells | Ncf2     |
| 7.03E-263 | 0.81853933 | 0.962 | 0.911 | 9.96E-259 | T cells | Rplp0    |
| 2.44E-257 | 1.68203769 | 0.42  | 0.092 | 3.46E-253 | T cells | Cxcr6    |
| 2.60E-254 | 1.52973864 | 0.732 | 0.406 | 3.68E-250 | T cells | Lgals1   |
| 2.04E-253 | 1.28305649 | 0.813 | 0.424 | 2.89E-249 | T cells | AW112010 |
| 2.12E-249 | -3.1267975 | 0.089 | 0.451 | 3.00E-245 | T cells | Ifitm3   |
| 2.00E-246 | 1.32881052 | 0.375 | 0.07  | 2.83E-242 | T cells | Tox      |
| 2.09E-246 | -2.2187717 | 0.019 | 0.361 | 2.95E-242 | T cells | H2-DMb2  |
| 9.16E-246 | 1.33648356 | 0.325 | 0.045 | 1.30E-241 | T cells | Cd5      |
| 1.09E-243 | -1.8604778 | 0.019 | 0.358 | 1.54E-239 | T cells | Mef2c    |
| 2.12E-243 | -2.2654484 | 0.379 | 0.658 | 3.00E-239 | T cells | Ctss     |
| 6.21E-241 | -2.5631798 | 0.011 | 0.342 | 8.79E-237 | T cells | Ebf1     |
| 1.30E-236 | 0.78272219 | 0.956 | 0.888 | 1.84E-232 | T cells | Rps15a   |
| 1.85E-235 | -2.2720331 | 0.054 | 0.402 | 2.62E-231 | T cells | Plaur    |
| 2.21E-235 | -4.1356873 | 0.055 | 0.397 | 3.12E-231 | T cells | Il1b     |
| 1.43E-228 | -3.106064  | 0.05  | 0.383 | 2.02E-224 | T cells | Ccl6     |
| 2.05E-227 | 1.56721408 | 0.524 | 0.179 | 2.91E-223 | T cells | Klrd1    |
| 4.44E-226 | -1.0710541 | 0.773 | 0.856 | 6.28E-222 | T cells | Ly6e     |
| 3.55E-221 | -3.1511698 | 0.086 | 0.421 | 5.03E-217 | T cells | Apoe     |
| 2.99E-219 | 1.13123418 | 0.678 | 0.331 | 4.23E-215 | T cells | Hcst     |
| 1.28E-218 | 1.127166   | 0.706 | 0.344 | 1.81E-214 | T cells | Cd2      |
| 6.26E-218 | -1.5888369 | 0.157 | 0.493 | 8.87E-214 | T cells | H2-DMa   |
| 1.24E-215 | 1.16831698 | 0.544 | 0.199 | 1.75E-211 | T cells | Gimap3   |
| 5.08E-214 | 1.07574607 | 0.558 | 0.208 | 7.19E-210 | T cells | Gimap4   |
| 1.66E-212 | -1.5241131 | 0.055 | 0.378 | 2.35E-208 | T cells | Tpd52    |
| 4.34E-212 | 1.00257227 | 0.649 | 0.293 | 6.14E-208 | T cells | 1-Sep    |
| 5.10E-212 | -2.2510858 | 0.363 | 0.63  | 7.22E-208 | T cells | Psap     |
| 7.70E-211 | 1.12852651 | 0.45  | 0.138 | 1.09E-206 | T cells | Zgpat    |
| 1.88E-210 | -2.7346666 | 0.019 | 0.325 | 2.66E-206 | T cells | Ly6d     |
| 2.04E-210 | -1.5360709 | 0.024 | 0.33  | 2.88E-206 | T cells | Cyp4f18  |
| 1.74E-209 | -1.6030412 | 0.152 | 0.482 | 2.46E-205 | T cells | Ctsz     |
| 1.10E-208 | -2.037182  | 0.174 | 0.498 | 1.56E-204 | T cells | Ifi30    |
| 3.16E-208 | 1.09211197 | 0.736 | 0.407 | 4.47E-204 | T cells | Ptprcap  |
| 1.02E-207 | 1.04585272 | 0.468 | 0.14  | 1.45E-203 | T cells | Il2rb    |
| 6.37E-205 | -2.2946277 | 0.051 | 0.361 | 9.01E-201 | T cells | Cd79b    |
| 2.68E-204 | -1.6915819 | 0.077 | 0.396 | 3.79E-200 | T cells | Cybb     |
| 1.32E-202 | -2.0697847 | 0.421 | 0.658 | 1.87E-198 | T cells | Cst3     |
| 1.62E-201 | -2.7134583 | 0.048 | 0.357 | 2.30E-197 | T cells | Wfdc17   |
| 2.01E-201 | 1.08467025 | 0.337 | 0.071 | 2.84E-197 | T cells | Zap70    |
| 7.77E-201 | 1.13130212 | 0.403 | 0.109 | 1.10E-196 | T cells | Rnf125   |
| 2.99E-200 | 1.19761842 | 0.457 | 0.153 | 4.23E-196 | T cells | Ptpn22   |
| 1.17E-199 | -1.4702946 | 0.044 | 0.347 | 1.65E-195 | T cells | Pld4     |
| 3.53E-197 | -1.2456562 | 0.021 | 0.31  | 5.00E-193 | T cells | Dok3     |
| 1.40E-195 | -1.6644561 | 0.051 | 0.357 | 1.99E-191 | T cells | H2-DMb1  |
| 1.09E-194 | -1.2042757 | 0.019 | 0.306 | 1.54E-190 | T cells | Aldh2    |

|           |            |       |       |           |         |          |
|-----------|------------|-------|-------|-----------|---------|----------|
| 4.04E-193 | -2.0878228 | 0.121 | 0.441 | 5.72E-189 | T cells | Atf3     |
| 9.05E-191 | 1.08113161 | 0.273 | 0.042 | 1.28E-186 | T cells | Cd6      |
| 1.31E-190 | 1.11331862 | 0.425 | 0.128 | 1.85E-186 | T cells | Prkca    |
| 1.84E-189 | 1.20046505 | 0.434 | 0.142 | 2.61E-185 | T cells | Prkch    |
| 4.27E-187 | 1.11546725 | 0.418 | 0.129 | 6.04E-183 | T cells | Gimap7   |
| 1.02E-186 | 0.67091345 | 0.96  | 0.878 | 1.44E-182 | T cells | Ppia     |
| 2.98E-186 | 0.82597184 | 0.889 | 0.745 | 4.22E-182 | T cells | Rac2     |
| 3.98E-185 | 1.17876208 | 0.551 | 0.252 | 5.64E-181 | T cells | Saraf    |
| 8.55E-184 | -1.8582546 | 0.008 | 0.273 | 1.21E-179 | T cells | Fcmr     |
| 4.73E-182 | -1.7254793 | 0.049 | 0.332 | 6.70E-178 | T cells | Fcgr3    |
| 1.32E-181 | 1.20817005 | 0.399 | 0.125 | 1.87E-177 | T cells | Dut      |
| 7.50E-181 | 0.88884413 | 0.267 | 0.043 | 1.06E-176 | T cells | Klk8     |
| 8.63E-180 | -1.7379418 | 0.034 | 0.309 | 1.22E-175 | T cells | H2-Ob    |
| 3.07E-176 | -1.4749631 | 0.293 | 0.573 | 4.34E-172 | T cells | Serp1    |
| 1.81E-175 | 1.09943189 | 0.684 | 0.411 | 2.57E-171 | T cells | Ndfip1   |
| 2.20E-175 | -1.2681191 | 0.06  | 0.346 | 3.12E-171 | T cells | Nrros    |
| 8.43E-174 | 1.28705394 | 0.576 | 0.281 | 1.19E-169 | T cells | S100a4   |
| 7.23E-173 | 0.6760617  | 0.965 | 0.887 | 1.02E-168 | T cells | H2-K1    |
| 3.19E-172 | -1.7222099 | 0.01  | 0.263 | 4.52E-168 | T cells | Ms4a1    |
| 1.03E-171 | 0.52795668 | 0.958 | 0.883 | 1.46E-167 | T cells | Rpl11    |
| 1.15E-170 | 0.90946887 | 0.232 | 0.03  | 1.63E-166 | T cells | Bcl11b   |
| 9.74E-170 | 0.55087516 | 0.961 | 0.946 | 1.38E-165 | T cells | Tpt1     |
| 5.58E-169 | -1.5189457 | 0.512 | 0.728 | 7.91E-165 | T cells | Fos      |
| 2.19E-166 | -1.9205357 | 0.085 | 0.359 | 3.10E-162 | T cells | Lst1     |
| 1.21E-162 | -1.4202321 | 0.029 | 0.287 | 1.71E-158 | T cells | Cd24a    |
| 2.20E-161 | 0.92990396 | 0.558 | 0.273 | 3.12E-157 | T cells | Leprotl1 |
| 3.12E-161 | -1.0907994 | 0.044 | 0.305 | 4.41E-157 | T cells | Pkig     |
| 4.06E-161 | -2.1318616 | 0.03  | 0.281 | 5.75E-157 | T cells | Cd14     |
| 6.46E-160 | 1.10406998 | 0.201 | 0.02  | 9.14E-156 | T cells | Tcf7     |
| 1.68E-157 | -1.2832177 | 0.286 | 0.563 | 2.38E-153 | T cells | Ier5     |
| 2.71E-157 | -1.6177744 | 0.127 | 0.407 | 3.83E-153 | T cells | Klf4     |
| 1.64E-156 | -1.6483278 | 0.024 | 0.266 | 2.32E-152 | T cells | Pla2g7   |
| 2.77E-156 | -1.4822657 | 0.041 | 0.293 | 3.92E-152 | T cells | Fcgr2b   |
| 6.25E-156 | 1.14091977 | 0.263 | 0.052 | 8.85E-152 | T cells | Izumo1r  |
| 4.39E-155 | -1.9796373 | 0.045 | 0.295 | 6.21E-151 | T cells | Tgfb1    |
| 1.36E-154 | -1.4184076 | 0.007 | 0.237 | 1.92E-150 | T cells | Cd19     |
| 3.40E-152 | 1.13713005 | 0.213 | 0.029 | 4.82E-148 | T cells | Lef1     |
| 3.95E-152 | -1.2430344 | 0.029 | 0.268 | 5.60E-148 | T cells | Pirb     |
| 9.06E-152 | -2.1018524 | 0.445 | 0.645 | 1.28E-147 | T cells | Cebpb    |
| 3.76E-151 | -1.2917828 | 0.029 | 0.269 | 5.32E-147 | T cells | Plbd1    |
| 7.07E-151 | -1.3690782 | 0.025 | 0.262 | 1.00E-146 | T cells | Mpeg1    |
| 1.28E-150 | 0.83569743 | 0.275 | 0.061 | 1.81E-146 | T cells | Sh2d1a   |
| 1.36E-150 | -1.6177531 | 0.05  | 0.298 | 1.93E-146 | T cells | Lgmn     |
| 2.72E-148 | 1.6973942  | 0.298 | 0.075 | 3.86E-144 | T cells | Tnfrsf4  |
| 7.57E-148 | 1.42463964 | 0.245 | 0.048 | 1.07E-143 | T cells | Il7r     |
| 1.29E-146 | -1.419874  | 0.119 | 0.39  | 1.83E-142 | T cells | Rhob     |
| 4.00E-146 | 0.95455386 | 0.291 | 0.073 | 5.66E-142 | T cells | Inpp4b   |
| 3.35E-145 | -1.2874565 | 0.007 | 0.224 | 4.75E-141 | T cells | Bank1    |

|           |            |       |       |           |         |         |
|-----------|------------|-------|-------|-----------|---------|---------|
| 4.20E-144 | 1.11055415 | 0.243 | 0.048 | 5.94E-140 | T cells | Rgs16   |
| 4.93E-144 | 1.22594076 | 0.403 | 0.143 | 6.98E-140 | T cells | Gzmb    |
| 1.24E-143 | -2.2696416 | 0.019 | 0.242 | 1.75E-139 | T cells | Hp      |
| 1.40E-142 | -0.9474958 | 0.021 | 0.246 | 1.98E-138 | T cells | Plcg2   |
| 1.22E-141 | -1.704963  | 0.072 | 0.315 | 1.72E-137 | T cells | Ms4a6c  |
| 1.23E-141 | 0.55363783 | 0.96  | 0.898 | 1.75E-137 | T cells | Rps2    |
| 2.91E-141 | -1.2208817 | 0.471 | 0.737 | 4.12E-137 | T cells | Klf2    |
| 5.53E-141 | -1.1435918 | 0.041 | 0.275 | 7.82E-137 | T cells | Csf2ra  |
| 5.93E-141 | 1.26368537 | 0.247 | 0.052 | 8.40E-137 | T cells | Gzmk    |
| 9.75E-141 | 0.85154016 | 0.531 | 0.254 | 1.38E-136 | T cells | Ms4a6b  |
| 5.39E-139 | 1.21333891 | 0.595 | 0.326 | 7.63E-135 | T cells | Nr4a2   |
| 5.98E-139 | 0.96664185 | 0.775 | 0.563 | 8.46E-135 | T cells | S100a10 |
| 1.27E-138 | 1.4794575  | 0.336 | 0.103 | 1.80E-134 | T cells | Irfng   |
| 2.45E-138 | -1.4830534 | 0.036 | 0.262 | 3.47E-134 | T cells | Csf1r   |
| 4.54E-138 | 0.67009324 | 0.19  | 0.024 | 6.42E-134 | T cells | Camk4   |
| 1.39E-137 | -3.4324692 | 0.039 | 0.266 | 1.96E-133 | T cells | Cxcl2   |
| 2.61E-137 | 0.50250119 | 0.957 | 0.9   | 3.69E-133 | T cells | Rpl18   |
| 2.43E-136 | -1.3058171 | 0.138 | 0.394 | 3.44E-132 | T cells | Nfe2l2  |
| 5.12E-136 | -1.5149565 | 0.07  | 0.312 | 7.25E-132 | T cells | Marcks1 |
| 1.58E-135 | 1.211837   | 0.301 | 0.087 | 2.24E-131 | T cells | Tnfrsf9 |
| 4.39E-135 | -1.1866216 | 0.051 | 0.285 | 6.22E-131 | T cells | Kctd12  |
| 1.84E-134 | -0.9433831 | 0.031 | 0.252 | 2.61E-130 | T cells | Irf5    |
| 4.13E-134 | 0.79496711 | 0.271 | 0.068 | 5.84E-130 | T cells | Mllt3   |
| 7.43E-134 | -2.3719473 | 0.18  | 0.419 | 1.05E-129 | T cells | Msrb1   |
| 1.40E-131 | 1.04484994 | 0.579 | 0.32  | 1.99E-127 | T cells | Id2     |
| 4.03E-131 | -1.0823203 | 0.037 | 0.258 | 5.71E-127 | T cells | Themis2 |
| 5.17E-131 | -1.6431383 | 0.465 | 0.658 | 7.32E-127 | T cells | Nr4a1   |
| 6.38E-131 | -1.3286723 | 0.005 | 0.202 | 9.03E-127 | T cells | Fcer2a  |
| 3.29E-130 | -1.4008866 | 0.155 | 0.411 | 4.66E-126 | T cells | Irf8    |
| 4.89E-130 | 0.54235502 | 0.933 | 0.855 | 6.92E-126 | T cells | Rpl13a  |
| 8.75E-130 | -0.9773106 | 0.032 | 0.248 | 1.24E-125 | T cells | Rassf4  |
| 9.60E-130 | 0.82906634 | 0.23  | 0.047 | 1.36E-125 | T cells | Cd226   |
| 2.68E-129 | -0.9736212 | 0.025 | 0.236 | 3.80E-125 | T cells | Hck     |
| 3.35E-129 | 0.91541677 | 0.331 | 0.111 | 4.74E-125 | T cells | Rinl    |
| 3.78E-129 | 0.63796074 | 0.94  | 0.886 | 5.35E-125 | T cells | Rplp1   |
| 8.92E-129 | 0.68889676 | 0.173 | 0.02  | 1.26E-124 | T cells | Themis  |
| 3.38E-128 | 0.82809971 | 0.41  | 0.162 | 4.79E-124 | T cells | Gimap5  |
| 8.60E-127 | -1.0187103 | 0.036 | 0.251 | 1.22E-122 | T cells | Lrrc25  |
| 1.55E-126 | -1.3894998 | 0.03  | 0.242 | 2.20E-122 | T cells | Anxa1   |
| 2.19E-125 | -1.1050883 | 0.256 | 0.497 | 3.10E-121 | T cells | Bri3    |
| 3.25E-125 | 1.08442211 | 0.723 | 0.534 | 4.61E-121 | T cells | Arl6ip1 |
| 1.70E-124 | -0.998679  | 0.009 | 0.2   | 2.40E-120 | T cells | Blnk    |
| 5.14E-124 | -1.9702305 | 0.015 | 0.211 | 7.27E-120 | T cells | Tnfaip2 |
| 7.32E-124 | -1.3691072 | 0.087 | 0.312 | 1.04E-119 | T cells | Cd68    |
| 9.26E-124 | -1.1966304 | 0.051 | 0.268 | 1.31E-119 | T cells | Cd72    |
| 1.33E-123 | 0.47726654 | 0.937 | 0.888 | 1.89E-119 | T cells | Rps3    |
| 7.77E-123 | -0.9699353 | 0.015 | 0.21  | 1.10E-118 | T cells | Cd300a  |
| 3.72E-122 | 0.54935986 | 0.905 | 0.81  | 5.26E-118 | T cells | Rpl3    |

|           |            |       |       |           |         |          |
|-----------|------------|-------|-------|-----------|---------|----------|
| 9.20E-122 | 0.93366064 | 0.297 | 0.094 | 1.30E-117 | T cells | Gtf2i    |
| 9.31E-122 | -1.2275118 | 0.325 | 0.552 | 1.32E-117 | T cells | Mcl1     |
| 3.04E-121 | -1.7500667 | 0.195 | 0.434 | 4.30E-117 | T cells | Plac8    |
| 3.28E-121 | 0.70092784 | 0.752 | 0.562 | 4.64E-117 | T cells | Eif3h    |
| 4.43E-121 | -1.0755792 | 0.069 | 0.293 | 6.27E-117 | T cells | Ms4a4c   |
| 6.19E-121 | 0.79170908 | 0.477 | 0.217 | 8.76E-117 | T cells | Gimap1   |
| 2.21E-119 | 0.64976575 | 0.226 | 0.051 | 3.13E-115 | T cells | Lime1    |
| 3.31E-119 | -1.1369539 | 0.067 | 0.288 | 4.69E-115 | T cells | Cd81     |
| 3.57E-119 | -1.0080637 | 0.022 | 0.217 | 5.05E-115 | T cells | Clec4a3  |
| 1.16E-118 | 0.7075816  | 0.235 | 0.055 | 1.64E-114 | T cells | Sla2     |
| 1.61E-118 | -0.993826  | 0.093 | 0.322 | 2.28E-114 | T cells | Prkcd    |
| 1.66E-118 | -1.6492501 | 0.011 | 0.197 | 2.36E-114 | T cells | Clec4e   |
| 1.27E-117 | -0.8205663 | 0.037 | 0.242 | 1.79E-113 | T cells | Rnf130   |
| 2.26E-117 | -1.9843978 | 0.009 | 0.191 | 3.20E-113 | T cells | Trem1    |
| 3.26E-117 | -1.2816537 | 0.243 | 0.49  | 4.62E-113 | T cells | Neat1    |
| 9.52E-117 | -1.3086825 | 0.012 | 0.195 | 1.35E-112 | T cells | C5ar1    |
| 1.38E-116 | 0.9051439  | 0.342 | 0.12  | 1.96E-112 | T cells | Ctla2a   |
| 2.94E-116 | 0.65208001 | 0.951 | 0.905 | 4.16E-112 | T cells | Gapdh    |
| 4.59E-116 | -1.0926159 | 0.329 | 0.563 | 6.50E-112 | T cells | Pde4b    |
| 9.81E-116 | -1.1285068 | 0.006 | 0.183 | 1.39E-111 | T cells | Fcrla    |
| 7.15E-115 | -0.9432329 | 0.352 | 0.582 | 1.01E-110 | T cells | Serinc3  |
| 1.42E-114 | -1.2357713 | 0.014 | 0.198 | 2.02E-110 | T cells | Mgst1    |
| 2.53E-114 | 0.67908729 | 0.208 | 0.043 | 3.58E-110 | T cells | Prkcc    |
| 4.08E-114 | 0.45660801 | 0.961 | 0.911 | 5.78E-110 | T cells | Rps3a1   |
| 3.76E-113 | 0.94846032 | 0.212 | 0.047 | 5.32E-109 | T cells | Ccr8     |
| 3.79E-113 | 0.90485548 | 0.38  | 0.161 | 5.36E-109 | T cells | Smc4     |
| 5.99E-113 | -1.092275  | 0.008 | 0.184 | 8.47E-109 | T cells | Blk      |
| 2.97E-112 | -0.9618657 | 0.105 | 0.333 | 4.20E-108 | T cells | AB124611 |
| 1.25E-111 | 1.09932359 | 0.218 | 0.052 | 1.77E-107 | T cells | Ikzf2    |
| 1.42E-111 | -1.0218574 | 0.038 | 0.234 | 2.01E-107 | T cells | Marcks   |
| 8.26E-111 | -1.0898307 | 0.012 | 0.188 | 1.17E-106 | T cells | Gda      |
| 8.31E-111 | -0.941117  | 0.023 | 0.207 | 1.18E-106 | T cells | Sirpa    |
| 1.96E-110 | 0.70833878 | 0.236 | 0.062 | 2.78E-106 | T cells | Mgst2    |
| 2.58E-109 | -0.7809826 | 0.023 | 0.206 | 3.65E-105 | T cells | BC028528 |
| 4.48E-109 | -1.0391666 | 0.004 | 0.17  | 6.34E-105 | T cells | Scd1     |
| 1.51E-108 | -0.9644704 | 0.011 | 0.184 | 2.14E-104 | T cells | Mzb1     |
| 4.49E-108 | -1.4075782 | 0.422 | 0.591 | 6.36E-104 | T cells | Sat1     |
| 5.09E-108 | -0.8188575 | 0.023 | 0.204 | 7.21E-104 | T cells | Rnase6   |
| 8.80E-107 | -1.0546701 | 0.223 | 0.461 | 1.25E-102 | T cells | Rel      |
| 1.13E-106 | -1.2429614 | 0.018 | 0.193 | 1.61E-102 | T cells | Cd300ld  |
| 1.30E-106 | -1.2148193 | 0.175 | 0.404 | 1.85E-102 | T cells | Cxcr4    |
| 1.57E-106 | -1.0205968 | 0.142 | 0.374 | 2.22E-102 | T cells | Kdm6b    |
| 1.95E-105 | -2.8175174 | 0.017 | 0.19  | 2.76E-101 | T cells | Slpi     |
| 2.18E-105 | 0.68992017 | 0.18  | 0.034 | 3.09E-101 | T cells | Pde4d    |
| 3.01E-105 | -0.8209432 | 0.043 | 0.234 | 4.26E-101 | T cells | Blvrb    |
| 3.45E-105 | -1.2370778 | 0.041 | 0.229 | 4.89E-101 | T cells | Fcgr4    |
| 3.86E-105 | -0.9358522 | 0.017 | 0.19  | 5.46E-101 | T cells | Sirpb1c  |
| 6.99E-105 | 0.83459349 | 0.651 | 0.426 | 9.90E-101 | T cells | Mbnl1    |

|           |            |       |       |           |         |          |
|-----------|------------|-------|-------|-----------|---------|----------|
| 1.11E-104 | 0.43900866 | 0.944 | 0.902 | 1.57E-100 | T cells | Rpl9-ps6 |
| 1.35E-104 | 0.83994498 | 0.301 | 0.108 | 1.91E-100 | T cells | Pkp3     |
| 1.95E-104 | 0.44982419 | 0.981 | 0.97  | 2.76E-100 | T cells | Ubb      |
| 2.44E-104 | 0.82042575 | 0.323 | 0.126 | 3.45E-100 | T cells | Acot7    |
| 2.28E-103 | -1.5021543 | 0.087 | 0.289 | 3.23E-99  | T cells | Grn      |
| 4.46E-103 | -0.409325  | 0.012 | 0.177 | 6.31E-99  | T cells | 1-Mar    |
| 7.65E-103 | -0.9672511 | 0.076 | 0.278 | 1.08E-98  | T cells | Gns      |
| 9.62E-103 | -0.954097  | 0.007 | 0.169 | 1.36E-98  | T cells | Fam43a   |
| 1.42E-102 | 0.98027035 | 0.323 | 0.129 | 2.01E-98  | T cells | Rbpj     |
| 2.28E-102 | 0.78306232 | 0.541 | 0.321 | 3.23E-98  | T cells | S100a13  |
| 4.30E-102 | -1.3979239 | 0.109 | 0.316 | 6.09E-98  | T cells | Gngt2    |
| 9.56E-102 | -1.1921777 | 0.194 | 0.404 | 1.35E-97  | T cells | Lamp1    |
| 1.69E-101 | -0.9251745 | 0.031 | 0.21  | 2.39E-97  | T cells | Rasgef1b |
| 1.93E-101 | 0.9074606  | 0.425 | 0.203 | 2.73E-97  | T cells | Il21r    |
| 2.36E-101 | -0.8993682 | 0.019 | 0.188 | 3.34E-97  | T cells | Fgr      |
| 3.16E-101 | -0.8939491 | 0.019 | 0.188 | 4.47E-97  | T cells | Nfam1    |
| 6.53E-101 | -1.2405169 | 0.055 | 0.247 | 9.24E-97  | T cells | Id3      |
| 2.29E-100 | 0.50202531 | 0.923 | 0.851 | 3.24E-96  | T cells | Oaz1     |
| 5.63E-100 | -1.246479  | 0.01  | 0.169 | 7.97E-96  | T cells | Nlrp3    |
| 1.02E-99  | -1.046975  | 0.369 | 0.566 | 1.44E-95  | T cells | Samhd1   |
| 2.01E-99  | 0.57864832 | 0.827 | 0.723 | 2.84E-95  | T cells | Eef1b2   |
| 2.07E-99  | -0.9791103 | 0.029 | 0.203 | 2.93E-95  | T cells | Sdc4     |
| 3.82E-99  | -1.4444058 | 0.531 | 0.678 | 5.40E-95  | T cells | Dusp1    |
| 4.85E-99  | 0.76630293 | 0.643 | 0.381 | 6.87E-95  | T cells | Ltb      |
| 8.07E-99  | -1.2227355 | 0.026 | 0.196 | 1.14E-94  | T cells | Tgm2     |
| 1.22E-98  | -0.8454023 | 0.034 | 0.21  | 1.73E-94  | T cells | Clec12a  |
| 3.76E-98  | -1.0256646 | 0.39  | 0.604 | 5.32E-94  | T cells | Litaf    |
| 3.87E-98  | -0.93999   | 0.014 | 0.174 | 5.48E-94  | T cells | Pilra    |
| 4.78E-98  | 0.44302946 | 0.913 | 0.848 | 6.76E-94  | T cells | Rpl24    |
| 7.20E-98  | -0.8492827 | 0.015 | 0.177 | 1.02E-93  | T cells | Csf2rb   |
| 2.17E-97  | 0.61341487 | 0.171 | 0.034 | 3.07E-93  | T cells | Sdcbp2   |
| 5.46E-97  | 0.77667024 | 0.444 | 0.226 | 7.72E-93  | T cells | Ifi27    |
| 8.74E-97  | -0.7915117 | 0.018 | 0.18  | 1.24E-92  | T cells | Clec4a1  |
| 1.26E-96  | -1.2372065 | 0.063 | 0.252 | 1.78E-92  | T cells | Trib1    |
| 4.98E-96  | 0.43731233 | 0.894 | 0.841 | 7.05E-92  | T cells | Rpl27    |
| 1.84E-95  | -0.7125476 | 0.038 | 0.213 | 2.60E-91  | T cells | Scpep1   |
| 4.00E-95  | -1.4688313 | 0.008 | 0.159 | 5.66E-91  | T cells | Clec4d   |
| 6.25E-95  | -1.0676871 | 0.142 | 0.356 | 8.85E-91  | T cells | Sell     |
| 6.56E-95  | -1.2379746 | 0.014 | 0.17  | 9.28E-91  | T cells | Ifitm6   |
| 6.96E-95  | 0.70029129 | 0.18  | 0.039 | 9.86E-91  | T cells | Atxn1    |
| 2.48E-94  | -0.9239543 | 0.12  | 0.323 | 3.51E-90  | T cells | Sp140    |
| 3.50E-94  | -0.8968872 | 0.103 | 0.306 | 4.95E-90  | T cells | Zeb2     |
| 5.53E-94  | -0.9099968 | 0.04  | 0.214 | 7.82E-90  | T cells | Myadm    |
| 6.67E-94  | -0.8487374 | 0.022 | 0.183 | 9.44E-90  | T cells | Slc11a1  |
| 7.75E-94  | -1.5276506 | 0.011 | 0.164 | 1.10E-89  | T cells | Csf3r    |
| 1.13E-93  | 0.77924374 | 0.199 | 0.051 | 1.59E-89  | T cells | Cxcr3    |
| 1.18E-93  | -0.8391705 | 0.05  | 0.228 | 1.67E-89  | T cells | Skap2    |
| 1.50E-93  | 0.59898752 | 0.206 | 0.055 | 2.12E-89  | T cells | Smco4    |

|          |            |       |       |          |         |             |
|----------|------------|-------|-------|----------|---------|-------------|
| 1.62E-93 | -0.8335144 | 0.056 | 0.24  | 2.30E-89 | T cells | Ncf1        |
| 2.16E-93 | 0.70150807 | 0.628 | 0.42  | 3.05E-89 | T cells | Gstp1       |
| 6.19E-93 | 1.00782944 | 0.551 | 0.354 | 8.76E-89 | T cells | Sdf4        |
| 6.44E-93 | -1.1645453 | 0.043 | 0.218 | 9.11E-89 | T cells | Plk2        |
| 1.72E-92 | -0.8829503 | 0.188 | 0.402 | 2.43E-88 | T cells | Ptpn6       |
| 3.02E-92 | 0.57820978 | 0.162 | 0.031 | 4.28E-88 | T cells | Cd96        |
| 4.26E-92 | -0.995506  | 0.046 | 0.22  | 6.02E-88 | T cells | App         |
| 9.61E-92 | 0.7949307  | 0.459 | 0.241 | 1.36E-87 | T cells | Mrps6       |
| 1.00E-91 | -0.8464787 | 0.013 | 0.165 | 1.42E-87 | T cells | Emilin2     |
| 1.15E-91 | 0.71288209 | 0.352 | 0.153 | 1.63E-87 | T cells | D16Ertd472e |
| 1.49E-91 | 0.65197456 | 0.422 | 0.207 | 2.10E-87 | T cells | Tes         |
| 5.28E-91 | 0.52293492 | 0.16  | 0.031 | 7.47E-87 | T cells | Ubash3a     |
| 5.54E-91 | -0.8033592 | 0.055 | 0.237 | 7.85E-87 | T cells | Cerk        |
| 5.10E-90 | -1.4768451 | 0.049 | 0.221 | 7.21E-86 | T cells | Mafb        |
| 9.40E-90 | 0.68575711 | 0.432 | 0.226 | 1.33E-85 | T cells | Slc25a4     |
| 1.22E-89 | 0.80840108 | 0.587 | 0.363 | 1.72E-85 | T cells | Tnfaip3     |
| 1.74E-89 | 0.52618161 | 0.888 | 0.797 | 2.46E-85 | T cells | Rps18       |
| 4.10E-89 | -0.7840825 | 0.018 | 0.17  | 5.81E-85 | T cells | Itgam       |
| 4.13E-89 | 0.68152089 | 0.629 | 0.428 | 5.85E-85 | T cells | Abrac1      |
| 5.03E-89 | -0.8217161 | 0.007 | 0.148 | 7.12E-85 | T cells | Siglecg     |
| 6.87E-89 | 0.4170406  | 0.946 | 0.907 | 9.72E-85 | T cells | Rpl30       |
| 9.42E-89 | 0.67409055 | 0.333 | 0.145 | 1.33E-84 | T cells | Srpk1       |
| 1.10E-88 | 0.86425562 | 0.175 | 0.04  | 1.56E-84 | T cells | Nrn1        |
| 1.63E-88 | -0.6974996 | 0.02  | 0.172 | 2.30E-84 | T cells | Cd40        |
| 4.88E-88 | 0.49038987 | 0.858 | 0.762 | 6.91E-84 | T cells | Naca        |
| 2.35E-87 | -0.8516621 | 0.095 | 0.286 | 3.33E-83 | T cells | Trim25      |
| 2.57E-87 | -0.9372182 | 0.016 | 0.163 | 3.64E-83 | T cells | Serpinb1a   |
| 2.71E-87 | -1.2229443 | 0.076 | 0.251 | 3.84E-83 | T cells | Cd55        |
| 8.67E-87 | 0.50624003 | 0.849 | 0.739 | 1.23E-82 | T cells | Rps6        |
| 1.84E-86 | -0.9962113 | 0.338 | 0.535 | 2.60E-82 | T cells | Pim1        |
| 2.25E-86 | 0.67027185 | 0.183 | 0.045 | 3.19E-82 | T cells | Itm2a       |
| 2.87E-86 | -0.6049016 | 0.008 | 0.148 | 4.07E-82 | T cells | Btk         |
| 3.81E-86 | -0.9790006 | 0.015 | 0.161 | 5.40E-82 | T cells | Cd300lf     |
| 4.20E-86 | 0.57167755 | 0.206 | 0.059 | 5.94E-82 | T cells | Fam189b     |
| 6.18E-86 | -0.6495532 | 0.019 | 0.169 | 8.75E-82 | T cells | Fes         |
| 1.06E-85 | -0.7990722 | 0.014 | 0.158 | 1.51E-81 | T cells | Lrp1        |
| 3.59E-85 | -1.0217755 | 0.264 | 0.451 | 5.08E-81 | T cells | Snx5        |
| 3.76E-85 | -5.2931539 | 0.051 | 0.214 | 5.32E-81 | T cells | S100a8      |
| 4.42E-85 | -0.6702693 | 0.011 | 0.151 | 6.26E-81 | T cells | Gm15987     |
| 9.21E-85 | 0.67422525 | 0.558 | 0.346 | 1.30E-80 | T cells | Arl6ip5     |
| 2.73E-84 | -1.108294  | 0.059 | 0.229 | 3.87E-80 | T cells | Aif1        |
| 3.83E-84 | -0.8926826 | 0.1   | 0.287 | 5.42E-80 | T cells | Birc3       |
| 4.85E-84 | -0.6911995 | 0.035 | 0.193 | 6.87E-80 | T cells | Apobec1     |
| 6.11E-84 | 0.61205535 | 0.54  | 0.328 | 8.65E-80 | T cells | Rnaset2b    |
| 1.01E-83 | -0.6206687 | 0.009 | 0.146 | 1.43E-79 | T cells | Gm6377      |
| 1.09E-83 | -0.7467094 | 0.029 | 0.183 | 1.54E-79 | T cells | Tcf4        |
| 1.13E-83 | 0.42665502 | 0.91  | 0.86  | 1.60E-79 | T cells | Rplp2       |
| 1.27E-83 | -0.9352711 | 0.044 | 0.204 | 1.80E-79 | T cells | H2-Oa       |

|          |            |       |       |          |         |         |
|----------|------------|-------|-------|----------|---------|---------|
| 2.41E-83 | -0.8005233 | 0.01  | 0.147 | 3.42E-79 | T cells | Snn     |
| 2.66E-83 | 0.76328395 | 0.138 | 0.024 | 3.76E-79 | T cells | Cd4     |
| 2.69E-83 | 0.70520073 | 0.762 | 0.625 | 3.80E-79 | T cells | Hmgb1   |
| 4.80E-83 | 0.44698776 | 0.884 | 0.793 | 6.79E-79 | T cells | Rpl14   |
| 5.12E-83 | -0.6605609 | 0.01  | 0.147 | 7.25E-79 | T cells | Igsf6   |
| 6.19E-83 | 0.61639355 | 0.247 | 0.086 | 8.77E-79 | T cells | Spint2  |
| 7.41E-83 | 0.65126064 | 0.296 | 0.118 | 1.05E-78 | T cells | Gimap9  |
| 7.96E-83 | -1.0061323 | 0.233 | 0.422 | 1.13E-78 | T cells | Sdcbp   |
| 9.25E-83 | 0.67050785 | 0.51  | 0.312 | 1.31E-78 | T cells | Fkbp1a  |
| 1.11E-82 | 0.999835   | 0.364 | 0.178 | 1.58E-78 | T cells | Hilpda  |
| 1.50E-82 | -0.898989  | 0.056 | 0.223 | 2.12E-78 | T cells | Ralgps2 |
| 2.34E-82 | 0.71798913 | 0.239 | 0.084 | 3.31E-78 | T cells | Galnt6  |
| 2.56E-82 | -1.3509121 | 0.08  | 0.253 | 3.62E-78 | T cells | Cd9     |
| 2.59E-82 | 0.72930988 | 0.286 | 0.109 | 3.67E-78 | T cells | Prf1    |
| 5.19E-82 | -2.3215467 | 0.07  | 0.235 | 7.35E-78 | T cells | C1qc    |
| 5.21E-82 | -0.6105114 | 0.018 | 0.16  | 7.38E-78 | T cells | Fgd2    |
| 8.01E-82 | -0.7806859 | 0.008 | 0.141 | 1.13E-77 | T cells | Sirpb1b |
| 1.02E-81 | 0.38567845 | 0.949 | 0.905 | 1.44E-77 | T cells | Rpl19   |
| 1.24E-81 | 0.40185695 | 0.949 | 0.889 | 1.76E-77 | T cells | Rps4x   |
| 1.30E-81 | 0.53129319 | 0.823 | 0.714 | 1.84E-77 | T cells | Rpl5    |
| 1.49E-81 | 0.59162636 | 0.683 | 0.492 | 2.11E-77 | T cells | Eef1d   |
| 2.16E-81 | 0.65040549 | 0.159 | 0.035 | 3.06E-77 | T cells | Slamf1  |
| 3.25E-81 | 0.53387391 | 0.829 | 0.671 | 4.60E-77 | T cells | Shisa5  |
| 4.39E-81 | 0.61541755 | 0.748 | 0.585 | 6.21E-77 | T cells | Myl12a  |
| 6.57E-81 | 0.45444176 | 0.891 | 0.83  | 9.30E-77 | T cells | Rps23   |
| 8.11E-81 | 0.42335797 | 0.932 | 0.869 | 1.15E-76 | T cells | Rpl32   |
| 1.11E-80 | 0.45464987 | 0.906 | 0.816 | 1.58E-76 | T cells | Rpl10a  |
| 1.94E-80 | -0.6548305 | 0.048 | 0.21  | 2.75E-76 | T cells | Sypl    |
| 2.97E-80 | 0.61000899 | 0.287 | 0.112 | 4.21E-76 | T cells | Cd7     |
| 3.21E-80 | -1.6887719 | 0.01  | 0.143 | 4.55E-76 | T cells | Thbs1   |
| 4.15E-80 | -0.8731399 | 0.092 | 0.269 | 5.88E-76 | T cells | Pou2f2  |
| 6.74E-80 | -0.7718106 | 0.1   | 0.28  | 9.54E-76 | T cells | Plekho2 |
| 9.08E-80 | 0.5882686  | 0.517 | 0.285 | 1.29E-75 | T cells | Rgs1    |
| 1.31E-79 | 0.36077722 | 0.972 | 0.918 | 1.86E-75 | T cells | Rpl13   |
| 1.40E-79 | -0.7762144 | 0.006 | 0.133 | 1.98E-75 | T cells | Cxcr5   |
| 2.30E-79 | -2.5268703 | 0.096 | 0.263 | 3.25E-75 | T cells | C1qb    |
| 3.08E-79 | 0.62238971 | 0.719 | 0.552 | 4.36E-75 | T cells | S100a6  |
| 3.33E-79 | 0.60073083 | 0.765 | 0.625 | 4.72E-75 | T cells | Npm1    |
| 4.40E-79 | -0.8236733 | 0.024 | 0.167 | 6.23E-75 | T cells | Slc15a3 |
| 4.48E-79 | -0.8324179 | 0.021 | 0.161 | 6.35E-75 | T cells | Nupr1   |
| 1.00E-78 | 0.51144015 | 0.786 | 0.651 | 1.42E-74 | T cells | Uqcrh   |
| 1.14E-78 | 0.46064372 | 0.139 | 0.027 | 1.61E-74 | T cells | Prkcz   |
| 1.40E-78 | -0.5454034 | 0.014 | 0.148 | 1.97E-74 | T cells | Cd180   |
| 1.87E-78 | -0.7468433 | 0.018 | 0.154 | 2.64E-74 | T cells | Tlr2    |
| 4.15E-78 | -0.7982893 | 0.045 | 0.199 | 5.88E-74 | T cells | Lair1   |
| 5.18E-78 | -0.6379966 | 0.013 | 0.145 | 7.34E-74 | T cells | Klra2   |
| 5.35E-78 | -0.6308758 | 0.009 | 0.138 | 7.58E-74 | T cells | Snx8    |
| 7.68E-78 | 0.7083015  | 0.358 | 0.175 | 1.09E-73 | T cells | Batf    |



|          |            |       |       |          |         |         |
|----------|------------|-------|-------|----------|---------|---------|
| 1.98E-77 | -0.8513929 | 0.143 | 0.326 | 2.81E-73 | T cells | Snx2    |
| 2.43E-77 | 0.43776149 | 0.934 | 0.886 | 3.45E-73 | T cells | Rps7    |
| 2.45E-77 | -0.7117519 | 0.023 | 0.162 | 3.47E-73 | T cells | Ifi204  |
| 3.80E-77 | -0.7885297 | 0.006 | 0.129 | 5.38E-73 | T cells | Pou2af1 |
| 4.27E-77 | -0.9483783 | 0.308 | 0.504 | 6.04E-73 | T cells | Plek    |
| 5.78E-77 | -1.0519201 | 0.098 | 0.27  | 8.18E-73 | T cells | Plin2   |
| 1.92E-76 | -0.536221  | 0.014 | 0.144 | 2.72E-72 | T cells | Nuak2   |
| 5.01E-76 | -0.5432145 | 0.011 | 0.138 | 7.09E-72 | T cells | Lmo2    |
| 5.35E-76 | 0.58125003 | 0.228 | 0.078 | 7.58E-72 | T cells | Fam102a |
| 9.95E-76 | -0.7033795 | 0.003 | 0.122 | 1.41E-71 | T cells | Pax5    |
| 1.29E-75 | 0.55333646 | 0.832 | 0.713 | 1.82E-71 | T cells | Rpl12   |
| 1.31E-75 | -0.9297799 | 0.012 | 0.139 | 1.85E-71 | T cells | Mcemp1  |
| 2.07E-75 | 0.35523709 | 0.95  | 0.89  | 2.92E-71 | T cells | Rpl6    |
| 2.27E-75 | 0.58451428 | 0.735 | 0.59  | 3.21E-71 | T cells | Sumo2   |
| 2.80E-75 | -0.6163412 | 0.023 | 0.159 | 3.97E-71 | T cells | Pid1    |
| 3.06E-75 | -0.8234272 | 0.003 | 0.121 | 4.33E-71 | T cells | Vpreb3  |
| 4.98E-75 | -3.6095049 | 0.015 | 0.144 | 7.06E-71 | T cells | Retnlg  |
| 6.26E-75 | 0.405269   | 0.909 | 0.859 | 8.86E-71 | T cells | Rps14   |
| 7.00E-75 | 0.62255406 | 0.728 | 0.55  | 9.91E-71 | T cells | Ldha    |
| 9.78E-75 | -2.1185258 | 0.03  | 0.171 | 1.38E-70 | T cells | Il1r2   |
| 1.29E-74 | 0.66887714 | 0.393 | 0.212 | 1.83E-70 | T cells | Dnajc15 |
| 2.28E-74 | -1.0139518 | 0.015 | 0.143 | 3.23E-70 | T cells | Il1rn   |
| 2.62E-74 | -0.6085684 | 0.017 | 0.147 | 3.71E-70 | T cells | Lpcat2  |
| 3.30E-74 | 0.41491473 | 0.891 | 0.828 | 4.67E-70 | T cells | Rpl15   |
| 7.41E-74 | 0.39601998 | 0.951 | 0.873 | 1.05E-69 | T cells | Rpl8    |
| 1.20E-73 | -2.3043151 | 0.081 | 0.237 | 1.70E-69 | T cells | C1qa    |
| 1.93E-73 | 0.37411912 | 0.909 | 0.836 | 2.74E-69 | T cells | Rpl29   |
| 2.10E-73 | -0.9938604 | 0.232 | 0.422 | 2.97E-69 | T cells | Fosb    |
| 4.35E-73 | -0.5918873 | 0.048 | 0.199 | 6.16E-69 | T cells | Plekho1 |
| 6.41E-73 | 0.60292572 | 0.683 | 0.503 | 9.08E-69 | T cells | Tmem50a |
| 9.28E-73 | -0.8749918 | 0.067 | 0.226 | 1.31E-68 | T cells | Adrb2   |
| 1.18E-72 | 0.62194946 | 0.413 | 0.218 | 1.67E-68 | T cells | Ccnd2   |
| 1.40E-72 | -1.0027385 | 0.011 | 0.133 | 1.98E-68 | T cells | Ccr1    |
| 1.42E-72 | -5.5847477 | 0.07  | 0.222 | 2.01E-68 | T cells | S100a9  |
| 2.21E-72 | -0.5854661 | 0.014 | 0.139 | 3.12E-68 | T cells | Wdfy4   |
| 2.86E-72 | -0.6175954 | 0.003 | 0.118 | 4.05E-68 | T cells | Cd22    |
| 2.89E-72 | -1.3088035 | 0.01  | 0.13  | 4.09E-68 | T cells | Hcar2   |
| 4.71E-72 | 0.61275779 | 0.157 | 0.04  | 6.66E-68 | T cells | Sult2b1 |
| 5.79E-72 | 0.53687478 | 0.748 | 0.588 | 8.20E-68 | T cells | Ptpn18  |
| 7.12E-72 | 1.44261289 | 0.516 | 0.326 | 1.01E-67 | T cells | Ccl4    |
| 1.17E-71 | -0.8245948 | 0.033 | 0.171 | 1.66E-67 | T cells | Ms4a4a  |
| 1.44E-71 | -2.7014326 | 0.018 | 0.144 | 2.04E-67 | T cells | G0s2    |
| 1.49E-71 | -0.7134031 | 0.048 | 0.195 | 2.11E-67 | T cells | Asah1   |
| 1.57E-71 | 1.13070719 | 0.238 | 0.094 | 2.23E-67 | T cells | Dusp10  |
| 3.26E-71 | -0.7763358 | 0.092 | 0.257 | 4.61E-67 | T cells | Lamp2   |
| 5.91E-71 | 0.59072952 | 0.363 | 0.188 | 8.37E-67 | T cells | Fundc2  |
| 6.87E-71 | 0.86608379 | 0.155 | 0.039 | 9.73E-67 | T cells | Top2a   |
| 1.17E-70 | 0.63470966 | 0.29  | 0.13  | 1.65E-66 | T cells | Gnptg   |

|          |            |       |       |          |         |            |
|----------|------------|-------|-------|----------|---------|------------|
| 1.20E-70 | 1.59589524 | 0.377 | 0.204 | 1.70E-66 | T cells | Ccl3       |
| 1.76E-70 | 0.66105994 | 0.41  | 0.224 | 2.49E-66 | T cells | Bcl2a1d    |
| 1.90E-70 | 0.56237033 | 0.149 | 0.036 | 2.69E-66 | T cells | Tnfsf10    |
| 1.98E-70 | -0.9939302 | 0.137 | 0.313 | 2.80E-66 | T cells | Ets2       |
| 2.65E-70 | -0.7179685 | 0.024 | 0.155 | 3.76E-66 | T cells | Cfp        |
| 3.08E-70 | -0.827685  | 0.171 | 0.345 | 4.37E-66 | T cells | Gm2a       |
| 3.87E-70 | 0.46915135 | 0.135 | 0.029 | 5.48E-66 | T cells | Plcg1      |
| 4.62E-70 | 0.60315367 | 0.581 | 0.389 | 6.54E-66 | T cells | Elf1       |
| 7.16E-70 | 0.65776386 | 0.618 | 0.427 | 1.01E-65 | T cells | Ifngr1     |
| 2.48E-69 | 0.57445016 | 0.685 | 0.521 | 3.51E-65 | T cells | Ndufa13    |
| 3.35E-69 | 0.52314075 | 0.728 | 0.565 | 4.74E-65 | T cells | Ppib       |
| 3.66E-69 | 0.36503631 | 0.972 | 0.923 | 5.18E-65 | T cells | Rps8       |
| 4.08E-69 | 0.3767282  | 0.941 | 0.886 | 5.77E-65 | T cells | Rps5       |
| 4.60E-69 | 0.51264233 | 0.149 | 0.037 | 6.52E-65 | T cells | Stk39      |
| 4.82E-69 | -0.67379   | 0.006 | 0.118 | 6.82E-65 | T cells | Ceacam1    |
| 5.00E-69 | -1.2691822 | 0.409 | 0.526 | 7.07E-65 | T cells | Prdx5      |
| 6.07E-69 | -1.0262471 | 0.013 | 0.132 | 8.59E-65 | T cells | Osm        |
| 8.81E-69 | 0.60415933 | 0.225 | 0.082 | 1.25E-64 | T cells | Fasl       |
| 1.26E-68 | -0.7074175 | 0.033 | 0.168 | 1.79E-64 | T cells | Fcgr1      |
| 1.29E-68 | 0.51271523 | 0.576 | 0.379 | 1.82E-64 | T cells | Prdx6      |
| 1.44E-68 | -1.6038164 | 0.151 | 0.317 | 2.04E-64 | T cells | Ier3       |
| 1.69E-68 | -0.6081666 | 0.005 | 0.116 | 2.39E-64 | T cells | Bcl11a     |
| 2.23E-68 | -0.7247248 | 0.048 | 0.191 | 3.16E-64 | T cells | Swap70     |
| 4.31E-68 | -1.0494978 | 0.024 | 0.15  | 6.10E-64 | T cells | Ly6i       |
| 4.43E-68 | 0.62068495 | 0.247 | 0.099 | 6.27E-64 | T cells | Pitpnc1    |
| 4.95E-68 | -0.6365418 | 0.043 | 0.184 | 7.00E-64 | T cells | Map3k8     |
| 4.95E-68 | -0.5342805 | 0.013 | 0.131 | 7.00E-64 | T cells | Pkib       |
| 5.16E-68 | 0.33782632 | 0.887 | 0.649 | 7.31E-64 | T cells | Fxyd5      |
| 5.87E-68 | 0.51944647 | 0.615 | 0.413 | 8.31E-64 | T cells | Mif        |
| 7.21E-68 | 0.42195449 | 0.119 | 0.022 | 1.02E-63 | T cells | Gpr68      |
| 8.46E-68 | -0.491641  | 0.01  | 0.125 | 1.20E-63 | T cells | Lyl1       |
| 9.32E-68 | 0.53055736 | 0.23  | 0.088 | 1.32E-63 | T cells | Rpa2       |
| 1.03E-67 | -0.6084952 | 0.058 | 0.207 | 1.46E-63 | T cells | Pik3ap1    |
| 1.26E-67 | 0.47106319 | 0.86  | 0.767 | 1.79E-63 | T cells | Myl6       |
| 1.92E-67 | -0.890607  | 0.011 | 0.125 | 2.72E-63 | T cells | Gcnt2      |
| 2.25E-67 | 0.56558591 | 0.608 | 0.433 | 3.18E-63 | T cells | Ppp1r18    |
| 3.79E-67 | 0.52874902 | 0.195 | 0.064 | 5.37E-63 | T cells | Actn1      |
| 6.29E-67 | 0.39018011 | 0.118 | 0.022 | 8.91E-63 | T cells | 1700097N02 |
| 7.43E-67 | -0.6527773 | 0.016 | 0.135 | 1.05E-62 | T cells | Trf        |
| 9.12E-67 | 0.32854503 | 0.963 | 0.933 | 1.29E-62 | T cells | Uba52      |
| 1.16E-66 | 0.56295072 | 0.181 | 0.056 | 1.65E-62 | T cells | Sytl3      |
| 1.98E-66 | 0.69186803 | 0.421 | 0.253 | 2.80E-62 | T cells | Ech1       |
| 4.82E-66 | -0.6363256 | 0.022 | 0.145 | 6.83E-62 | T cells | Xylt1      |
| 5.04E-66 | 0.62279623 | 0.248 | 0.104 | 7.13E-62 | T cells | Serpib6a   |
| 5.87E-66 | 0.5238149  | 0.159 | 0.044 | 8.31E-62 | T cells | Cd160      |
| 6.96E-66 | -1.0409358 | 0.083 | 0.235 | 9.86E-62 | T cells | Rnf149     |
| 1.14E-65 | -1.3998467 | 0.01  | 0.121 | 1.61E-61 | T cells | Slc7a11    |
| 1.56E-65 | 0.56707987 | 0.418 | 0.239 | 2.21E-61 | T cells | Fkbp3      |

|          |            |       |       |          |         |          |
|----------|------------|-------|-------|----------|---------|----------|
| 2.27E-65 | -0.5415454 | 0.017 | 0.134 | 3.21E-61 | T cells | Ogfrl1   |
| 2.39E-65 | -0.4992709 | 0.014 | 0.13  | 3.38E-61 | T cells | Rbpms    |
| 2.90E-65 | 0.50302754 | 0.754 | 0.623 | 4.11E-61 | T cells | Rpl22l1  |
| 3.39E-65 | -1.1533631 | 0.156 | 0.32  | 4.80E-61 | T cells | Cdkn1a   |
| 4.30E-65 | -0.7078854 | 0.009 | 0.119 | 6.09E-61 | T cells | Pygl     |
| 5.83E-65 | -0.7494527 | 0.064 | 0.211 | 8.25E-61 | T cells | Snap23   |
| 9.67E-65 | -0.9288356 | 0.115 | 0.273 | 1.37E-60 | T cells | Ninj1    |
| 1.23E-64 | -0.4962737 | 0.017 | 0.133 | 1.74E-60 | T cells | Cd302    |
| 1.25E-64 | -0.8165917 | 0.027 | 0.151 | 1.76E-60 | T cells | Pltp     |
| 2.51E-64 | -0.6196052 | 0.036 | 0.165 | 3.56E-60 | T cells | Naaa     |
| 4.40E-64 | 0.50250195 | 0.708 | 0.547 | 6.22E-60 | T cells | Arf5     |
| 5.89E-64 | -1.6960172 | 0.023 | 0.143 | 8.34E-60 | T cells | Hdc      |
| 7.04E-64 | -0.5869604 | 0.758 | 0.83  | 9.97E-60 | T cells | Cyba     |
| 7.27E-64 | 0.42940431 | 0.954 | 0.95  | 1.03E-59 | T cells | Pfn1     |
| 9.14E-64 | 0.40882759 | 0.103 | 0.017 | 1.29E-59 | T cells | Apol7e   |
| 1.09E-63 | 0.6349889  | 0.633 | 0.477 | 1.54E-59 | T cells | Ran      |
| 1.09E-63 | -0.6363165 | 0.028 | 0.152 | 1.54E-59 | T cells | Sdc3     |
| 1.43E-63 | 0.3551925  | 0.933 | 0.905 | 2.03E-59 | T cells | Rps10    |
| 1.70E-63 | -0.719976  | 0.026 | 0.148 | 2.40E-59 | T cells | C3       |
| 2.31E-63 | -0.5245041 | 0.042 | 0.176 | 3.27E-59 | T cells | Prcp     |
| 3.81E-63 | -0.5715517 | 0.019 | 0.135 | 5.40E-59 | T cells | Clec4a2  |
| 4.14E-63 | -0.9054734 | 0.066 | 0.209 | 5.87E-59 | T cells | Ctsl     |
| 4.40E-63 | -0.6088643 | 0.596 | 0.696 | 6.22E-59 | T cells | Rhoa     |
| 7.89E-63 | -0.8959865 | 0.045 | 0.177 | 1.12E-58 | T cells | Cxcl16   |
| 8.56E-63 | -0.5572699 | 0.01  | 0.117 | 1.21E-58 | T cells | Gga2     |
| 1.02E-62 | -0.6561043 | 0.079 | 0.227 | 1.44E-58 | T cells | Hexa     |
| 1.11E-62 | 0.62741752 | 0.282 | 0.132 | 1.57E-58 | T cells | Tiprl    |
| 2.73E-62 | -0.4023283 | 0.006 | 0.109 | 3.86E-58 | T cells | Tifa     |
| 3.28E-62 | -0.4664543 | 0.017 | 0.13  | 4.65E-58 | T cells | P2ry6    |
| 3.49E-62 | -0.4635231 | 0.021 | 0.137 | 4.94E-58 | T cells | Dusp3    |
| 3.70E-62 | 0.31579704 | 0.958 | 0.924 | 5.24E-58 | T cells | Rpl18a   |
| 3.77E-62 | -0.9691531 | 0.126 | 0.283 | 5.34E-58 | T cells | Tnfrsf1a |
| 3.80E-62 | -0.5223504 | 0.014 | 0.123 | 5.38E-58 | T cells | Adgre1   |
| 3.90E-62 | 0.48655624 | 0.75  | 0.603 | 5.52E-58 | T cells | Atp5g3   |
| 4.36E-62 | -0.7489551 | 0.118 | 0.272 | 6.17E-58 | T cells | Hexb     |
| 5.35E-62 | -0.5876212 | 0.011 | 0.119 | 7.57E-58 | T cells | Trem2    |
| 6.73E-62 | -0.7553811 | 0.01  | 0.116 | 9.53E-58 | T cells | Gm9733   |
| 6.98E-62 | 0.50407276 | 0.19  | 0.064 | 9.88E-58 | T cells | Txk      |
| 7.28E-62 | 0.54787004 | 0.188 | 0.064 | 1.03E-57 | T cells | Tbx21    |
| 7.65E-62 | -1.0596948 | 0.048 | 0.18  | 1.08E-57 | T cells | Hmox1    |
| 8.22E-62 | -0.594644  | 0.014 | 0.124 | 1.16E-57 | T cells | Hacd4    |
| 1.51E-61 | -0.7030886 | 0.369 | 0.519 | 2.14E-57 | T cells | Atp6v0b  |
| 2.55E-61 | -1.7419133 | 0.057 | 0.19  | 3.61E-57 | T cells | Cxcl9    |
| 2.58E-61 | 0.31976401 | 0.94  | 0.901 | 3.65E-57 | T cells | Rps11    |
| 3.19E-61 | 0.49945187 | 0.137 | 0.035 | 4.51E-57 | T cells | Gata3    |
| 7.79E-61 | 0.61026544 | 0.216 | 0.085 | 1.10E-56 | T cells | Ier5l    |
| 7.98E-61 | -0.749969  | 0.162 | 0.328 | 1.13E-56 | T cells | Clic4    |
| 1.00E-60 | -0.5052798 | 0.03  | 0.151 | 1.42E-56 | T cells | Fcgrt    |

|          |            |       |       |          |         |          |
|----------|------------|-------|-------|----------|---------|----------|
| 1.32E-60 | 0.42063274 | 0.629 | 0.432 | 1.87E-56 | T cells | Selplg   |
| 1.39E-60 | 0.37268185 | 0.934 | 0.879 | 1.97E-56 | T cells | Rps26    |
| 3.23E-60 | 0.44266881 | 0.129 | 0.032 | 4.57E-56 | T cells | Tyms     |
| 3.83E-60 | -0.7530179 | 0.111 | 0.266 | 5.43E-56 | T cells | Creg1    |
| 4.22E-60 | -0.5464255 | 0.081 | 0.227 | 5.98E-56 | T cells | Stx7     |
| 4.65E-60 | 0.51072819 | 0.717 | 0.576 | 6.58E-56 | T cells | Atp5d    |
| 6.12E-60 | 0.65751619 | 0.5   | 0.332 | 8.66E-56 | T cells | H2afv    |
| 1.28E-59 | -0.8046099 | 0.131 | 0.284 | 1.81E-55 | T cells | Stap1    |
| 1.32E-59 | -0.456952  | 0.008 | 0.108 | 1.87E-55 | T cells | Pira2    |
| 2.19E-59 | 0.5665161  | 0.633 | 0.474 | 3.11E-55 | T cells | Preli1d1 |
| 2.45E-59 | 0.55959265 | 0.452 | 0.282 | 3.46E-55 | T cells | Sec11a   |
| 2.73E-59 | 0.61866194 | 0.514 | 0.344 | 3.86E-55 | T cells | Gm8797   |
| 3.39E-59 | 0.78871241 | 0.368 | 0.203 | 4.80E-55 | T cells | Rgcc     |
| 3.78E-59 | 0.56244609 | 0.191 | 0.069 | 5.36E-55 | T cells | Grap2    |
| 8.07E-59 | -0.7166755 | 0.09  | 0.235 | 1.14E-54 | T cells | Eif4ebp1 |
| 9.56E-59 | -1.2644145 | 0.083 | 0.22  | 1.35E-54 | T cells | Gsr      |
| 1.31E-58 | 0.50583111 | 0.649 | 0.487 | 1.85E-54 | T cells | Dad1     |
| 1.69E-58 | 0.62845509 | 0.494 | 0.331 | 2.40E-54 | T cells | Cd48     |
| 3.30E-58 | -0.7145387 | 0.03  | 0.147 | 4.67E-54 | T cells | B3gnt5   |
| 3.83E-58 | -0.6581804 | 0.038 | 0.16  | 5.42E-54 | T cells | Irs2     |
| 4.26E-58 | 0.43885534 | 0.694 | 0.504 | 6.03E-54 | T cells | Psme2    |
| 4.41E-58 | -0.5062423 | 0.043 | 0.168 | 6.24E-54 | T cells | Ptprj    |
| 6.36E-58 | 0.48670221 | 0.635 | 0.475 | 9.00E-54 | T cells | Cnn2     |
| 7.92E-58 | 0.37957335 | 0.12  | 0.028 | 1.12E-53 | T cells | Lockd    |
| 9.52E-58 | 0.42191847 | 0.963 | 0.855 | 1.35E-53 | T cells | Hsp90ab1 |
| 9.73E-58 | -0.4969236 | 0.01  | 0.11  | 1.38E-53 | T cells | Dpep2    |
| 2.07E-57 | -0.4076787 | 0.01  | 0.11  | 2.93E-53 | T cells | Ltbr     |
| 2.46E-57 | 0.38408993 | 0.119 | 0.028 | 3.48E-53 | T cells | Wdr95    |
| 4.66E-57 | -0.6923313 | 0.199 | 0.366 | 6.59E-53 | T cells | Il10ra   |
| 5.85E-57 | 0.52780178 | 0.613 | 0.46  | 8.28E-53 | T cells | Psmb3    |
| 7.93E-57 | 0.73425895 | 0.118 | 0.027 | 1.12E-52 | T cells | Hist1h1b |
| 1.02E-56 | -0.4496016 | 0.02  | 0.127 | 1.45E-52 | T cells | Adssl1   |
| 1.28E-56 | 0.41218339 | 0.167 | 0.056 | 1.81E-52 | T cells | Nt5c3b   |
| 1.32E-56 | -0.6268635 | 0.038 | 0.157 | 1.87E-52 | T cells | Cfap43   |
| 1.84E-56 | 0.46713903 | 0.726 | 0.593 | 2.60E-52 | T cells | Cox6c    |
| 1.87E-56 | 0.58051325 | 0.147 | 0.045 | 2.64E-52 | T cells | Cd200r1  |
| 2.02E-56 | 0.60874706 | 0.286 | 0.139 | 2.86E-52 | T cells | Dgka     |
| 2.06E-56 | -0.6032582 | 0.023 | 0.133 | 2.92E-52 | T cells | Oasl2    |
| 2.27E-56 | -0.4172883 | 0.009 | 0.106 | 3.21E-52 | T cells | Hhex     |
| 2.49E-56 | -1.0996221 | 0.182 | 0.331 | 3.53E-52 | T cells | Lilrb4a  |
| 3.21E-56 | 0.5536383  | 0.367 | 0.205 | 4.54E-52 | T cells | Vgll4    |
| 4.76E-56 | -1.1489912 | 0.01  | 0.106 | 6.74E-52 | T cells | Ptgs2    |
| 6.29E-56 | -1.7549499 | 0.036 | 0.154 | 8.90E-52 | T cells | Ifitm1   |
| 6.54E-56 | -1.1520796 | 0.034 | 0.149 | 9.26E-52 | T cells | Ccl2     |
| 9.39E-56 | 0.53796949 | 0.534 | 0.375 | 1.33E-51 | T cells | Csnk2b   |
| 1.32E-55 | 0.30473871 | 0.961 | 0.941 | 1.86E-51 | T cells | Gm10076  |
| 1.44E-55 | -1.584456  | 0.008 | 0.103 | 2.04E-51 | T cells | Wfdc21   |
| 1.73E-55 | 0.49541507 | 0.169 | 0.059 | 2.45E-51 | T cells | Rab19    |

|          |            |       |       |          |         |            |
|----------|------------|-------|-------|----------|---------|------------|
| 3.65E-55 | 0.49241526 | 0.175 | 0.064 | 5.17E-51 | T cells | Eva1b      |
| 4.70E-55 | -0.6820872 | 0.35  | 0.489 | 6.66E-51 | T cells | Erp29      |
| 4.92E-55 | 0.35566745 | 0.596 | 0.397 | 6.97E-51 | T cells | Ctsd       |
| 5.38E-55 | -0.5436919 | 0.053 | 0.178 | 7.61E-51 | T cells | Myo1c      |
| 5.85E-55 | -0.7093093 | 0.078 | 0.213 | 8.28E-51 | T cells | Gsn        |
| 1.03E-54 | 0.64603434 | 0.295 | 0.15  | 1.46E-50 | T cells | Chd3       |
| 1.10E-54 | 0.37781859 | 0.865 | 0.787 | 1.56E-50 | T cells | Rpl41      |
| 1.11E-54 | 0.61516265 | 0.246 | 0.115 | 1.56E-50 | T cells | Ubash3b    |
| 1.32E-54 | -0.4408383 | 0.008 | 0.102 | 1.87E-50 | T cells | Slc2a6     |
| 2.01E-54 | -0.5024748 | 0.033 | 0.147 | 2.85E-50 | T cells | Scimp      |
| 2.07E-54 | -0.536677  | 0.033 | 0.147 | 2.93E-50 | T cells | Gng12      |
| 2.48E-54 | -0.4641756 | 0.01  | 0.106 | 3.52E-50 | T cells | Atp6v0a1   |
| 2.77E-54 | 0.52969953 | 0.547 | 0.387 | 3.92E-50 | T cells | Mdh2       |
| 3.61E-54 | 0.52685427 | 0.55  | 0.394 | 5.11E-50 | T cells | Erh        |
| 4.19E-54 | -0.5022598 | 0.04  | 0.159 | 5.93E-50 | T cells | D1Ertd622e |
| 5.31E-54 | 0.33857963 | 0.916 | 0.87  | 7.52E-50 | T cells | Rps13      |
| 5.46E-54 | -0.8736987 | 0.127 | 0.273 | 7.73E-50 | T cells | Ndel1      |
| 5.68E-54 | -0.37216   | 0.01  | 0.105 | 8.04E-50 | T cells | Plxnb2     |
| 8.50E-54 | 0.38484226 | 0.822 | 0.738 | 1.20E-49 | T cells | Btf3       |
| 9.24E-54 | -0.7264348 | 0.13  | 0.275 | 1.31E-49 | T cells | Prkcb      |
| 1.12E-53 | 0.44038089 | 0.114 | 0.027 | 1.59E-49 | T cells | Sit1       |
| 1.13E-53 | 0.58198381 | 0.168 | 0.058 | 1.60E-49 | T cells | Klrc1      |
| 1.70E-53 | 0.47711933 | 0.221 | 0.095 | 2.40E-49 | T cells | Flt3l      |
| 1.93E-53 | -0.4467132 | 0.019 | 0.121 | 2.73E-49 | T cells | Hfe        |
| 2.32E-53 | -0.7720987 | 0.632 | 0.68  | 3.29E-49 | T cells | Atp6v0c    |
| 2.37E-53 | -0.4007831 | 0.009 | 0.101 | 3.36E-49 | T cells | Sirpb1a    |
| 2.43E-53 | -0.6119663 | 0.104 | 0.244 | 3.43E-49 | T cells | Arhgap17   |
| 4.08E-53 | -0.628277  | 0.618 | 0.703 | 5.77E-49 | T cells | Gabarap    |
| 4.91E-53 | -0.8105622 | 0.209 | 0.361 | 6.95E-49 | T cells | Gpcpd1     |
| 5.11E-53 | -0.6610391 | 0.031 | 0.14  | 7.24E-49 | T cells | Slamf9     |
| 5.38E-53 | -0.4357766 | 0.022 | 0.125 | 7.61E-49 | T cells | Ebi3       |
| 7.22E-53 | 0.35910349 | 0.955 | 0.934 | 1.02E-48 | T cells | Rps16      |
| 7.98E-53 | 0.58605821 | 0.675 | 0.503 | 1.13E-48 | T cells | Vps37b     |
| 8.21E-53 | -0.6261053 | 0.332 | 0.489 | 1.16E-48 | T cells | Tgfb1      |
| 8.27E-53 | 0.31074052 | 0.956 | 0.927 | 1.17E-48 | T cells | Rpl23      |
| 1.13E-52 | -0.5202193 | 0.11  | 0.254 | 1.60E-48 | T cells | Lat2       |
| 1.14E-52 | -0.6594212 | 0.085 | 0.218 | 1.61E-48 | T cells | Ero1lb     |
| 1.90E-52 | -0.6753942 | 0.018 | 0.116 | 2.69E-48 | T cells | Gatm       |
| 2.07E-52 | -0.682909  | 0.457 | 0.598 | 2.93E-48 | T cells | Tsc22d3    |
| 5.07E-52 | 0.86071265 | 0.278 | 0.145 | 7.17E-48 | T cells | Eea1       |
| 6.58E-52 | -0.4328946 | 0.018 | 0.118 | 9.32E-48 | T cells | Tcn2       |
| 9.40E-52 | -0.5064704 | 0.081 | 0.216 | 1.33E-47 | T cells | Lmo4       |
| 9.85E-52 | -0.6328982 | 0.861 | 0.886 | 1.39E-47 | T cells | Junb       |
| 1.07E-51 | -0.633465  | 0.441 | 0.575 | 1.52E-47 | T cells | Dazap2     |
| 1.15E-51 | -0.7420005 | 0.11  | 0.25  | 1.62E-47 | T cells | Picalm     |
| 1.25E-51 | -0.8232745 | 0.055 | 0.174 | 1.77E-47 | T cells | Tmem176b   |
| 1.42E-51 | -0.4314736 | 0.016 | 0.113 | 2.01E-47 | T cells | Plekhm3    |
| 1.92E-51 | -0.4906962 | 0.027 | 0.132 | 2.72E-47 | T cells | Atp13a2    |

|          |            |       |       |          |         |            |
|----------|------------|-------|-------|----------|---------|------------|
| 1.92E-51 | 0.56155805 | 0.118 | 0.031 | 2.72E-47 | T cells | Rora       |
| 2.03E-51 | 0.53975211 | 0.322 | 0.18  | 2.88E-47 | T cells | Naa10      |
| 2.48E-51 | -0.8736728 | 0.026 | 0.129 | 3.51E-47 | T cells | Ms4a7      |
| 4.80E-51 | 0.52822924 | 0.424 | 0.266 | 6.79E-47 | T cells | Mettl23    |
| 5.64E-51 | -0.354451  | 0.023 | 0.125 | 7.99E-47 | T cells | 5031439G07 |
| 6.12E-51 | 0.54199274 | 0.312 | 0.17  | 8.67E-47 | T cells | Rnf138     |
| 6.90E-51 | 0.32860819 | 0.111 | 0.027 | 9.77E-47 | T cells | Fam92a     |
| 1.06E-50 | -0.6016829 | 0.011 | 0.102 | 1.50E-46 | T cells | Tnfrsf13c  |
| 1.33E-50 | 0.40498873 | 0.107 | 0.026 | 1.88E-46 | T cells | Tmem191c   |
| 1.43E-50 | -0.4735054 | 0.048 | 0.165 | 2.03E-46 | T cells | P2rx4      |
| 1.61E-50 | 0.45753529 | 0.525 | 0.352 | 2.29E-46 | T cells | Rps27rt    |
| 1.67E-50 | 0.51186858 | 0.418 | 0.267 | 2.37E-46 | T cells | Rwdd1      |
| 3.22E-50 | 0.4847501  | 0.462 | 0.302 | 4.56E-46 | T cells | Emg1       |
| 3.32E-50 | 0.77383612 | 0.409 | 0.261 | 4.69E-46 | T cells | Hif1a      |
| 3.84E-50 | -0.6111982 | 0.171 | 0.32  | 5.44E-46 | T cells | Ppp3ca     |
| 4.09E-50 | 0.63787119 | 0.439 | 0.272 | 5.78E-46 | T cells | Ikzf3      |
| 4.09E-50 | -0.4450607 | 0.029 | 0.134 | 5.79E-46 | T cells | Sh2b3      |
| 4.14E-50 | -0.413083  | 0.023 | 0.122 | 5.86E-46 | T cells | Slamf8     |
| 4.60E-50 | 0.59959388 | 0.524 | 0.346 | 6.51E-46 | T cells | Gimap6     |
| 5.37E-50 | -0.826772  | 0.285 | 0.433 | 7.60E-46 | T cells | Foxp1      |
| 5.81E-50 | 0.40691587 | 0.172 | 0.065 | 8.23E-46 | T cells | Psph       |
| 6.24E-50 | -0.6164831 | 0.139 | 0.284 | 8.83E-46 | T cells | Gm26532    |
| 6.61E-50 | 0.62573052 | 0.113 | 0.029 | 9.35E-46 | T cells | Birc5      |
| 7.15E-50 | -0.5060608 | 0.041 | 0.153 | 1.01E-45 | T cells | Cnn3       |
| 7.96E-50 | -0.4241342 | 0.038 | 0.148 | 1.13E-45 | T cells | Acer3      |
| 8.46E-50 | 0.54735622 | 0.2   | 0.086 | 1.20E-45 | T cells | Gna15      |
| 9.91E-50 | 0.41256997 | 0.129 | 0.038 | 1.40E-45 | T cells | Pglyrp2    |
| 1.31E-49 | -0.4803007 | 0.023 | 0.121 | 1.86E-45 | T cells | Ciita      |
| 1.51E-49 | 0.39938216 | 0.78  | 0.646 | 2.13E-45 | T cells | Psmb8      |
| 1.55E-49 | 0.42597998 | 0.102 | 0.023 | 2.20E-45 | T cells | Cdca8      |
| 1.72E-49 | -0.6754187 | 0.044 | 0.155 | 2.44E-45 | T cells | Fchsd2     |
| 2.58E-49 | -0.3663383 | 0.012 | 0.102 | 3.65E-45 | T cells | Aldh3b1    |
| 2.60E-49 | 0.52828611 | 0.193 | 0.08  | 3.68E-45 | T cells | Cdk6       |
| 2.72E-49 | 0.40498775 | 0.296 | 0.151 | 3.86E-45 | T cells | Dnajc9     |
| 2.76E-49 | 0.51966434 | 0.265 | 0.131 | 3.91E-45 | T cells | Btg3       |
| 3.82E-49 | 0.52508071 | 0.273 | 0.141 | 5.40E-45 | T cells | Pld3       |
| 3.87E-49 | 0.35207882 | 0.413 | 0.236 | 5.47E-45 | T cells | Gm8369     |
| 3.93E-49 | -0.7010471 | 0.056 | 0.171 | 5.57E-45 | T cells | Hvcn1      |
| 4.74E-49 | -0.3832456 | 0.021 | 0.117 | 6.71E-45 | T cells | Rasa4      |
| 5.57E-49 | 0.40770076 | 0.733 | 0.616 | 7.89E-45 | T cells | Atp5g2     |
| 9.51E-49 | 0.43665986 | 0.593 | 0.393 | 1.35E-44 | T cells | Ets1       |
| 9.72E-49 | 0.3415097  | 0.873 | 0.798 | 1.38E-44 | T cells | Rpl7a      |
| 1.00E-48 | -0.5095917 | 0.021 | 0.118 | 1.42E-44 | T cells | Bcl2a1a    |
| 1.51E-48 | 0.46726204 | 0.211 | 0.093 | 2.14E-44 | T cells | Mcm6       |
| 1.87E-48 | 0.51895683 | 0.331 | 0.192 | 2.65E-44 | T cells | Tmem9b     |
| 2.14E-48 | 0.42935616 | 0.593 | 0.436 | 3.03E-44 | T cells | Sri        |
| 2.97E-48 | 0.4181619  | 0.138 | 0.045 | 4.20E-44 | T cells | Nmb        |
| 3.18E-48 | 0.3737828  | 0.113 | 0.03  | 4.49E-44 | T cells | Tk1        |

|          |            |       |       |          |         |             |
|----------|------------|-------|-------|----------|---------|-------------|
| 3.18E-48 | 0.7634424  | 0.137 | 0.044 | 4.51E-44 | T cells | Hist1h2ae   |
| 4.72E-48 | -0.3917449 | 0.034 | 0.138 | 6.68E-44 | T cells | Tmem106a    |
| 5.20E-48 | -0.433515  | 0.029 | 0.129 | 7.36E-44 | T cells | Rogdi       |
| 1.78E-47 | 0.5066136  | 0.347 | 0.202 | 2.52E-43 | T cells | Npm3        |
| 2.23E-47 | 0.47354594 | 0.201 | 0.086 | 3.15E-43 | T cells | Cers4       |
| 2.40E-47 | 0.34304829 | 0.217 | 0.096 | 3.39E-43 | T cells | Hsd11b1     |
| 2.82E-47 | -0.4729804 | 0.024 | 0.121 | 3.99E-43 | T cells | Snx30       |
| 2.90E-47 | 0.51931188 | 0.184 | 0.076 | 4.11E-43 | T cells | Utrn        |
| 3.74E-47 | -0.6131272 | 0.07  | 0.189 | 5.30E-43 | T cells | Sh3bp5      |
| 4.39E-47 | -0.9298311 | 0.359 | 0.514 | 6.22E-43 | T cells | Jun         |
| 4.96E-47 | 0.45241239 | 0.546 | 0.392 | 7.02E-43 | T cells | Nol7        |
| 6.54E-47 | 0.56875537 | 0.433 | 0.278 | 9.25E-43 | T cells | Cited2      |
| 6.56E-47 | 0.61387287 | 0.115 | 0.032 | 9.28E-43 | T cells | Mki67       |
| 8.63E-47 | 0.47744979 | 0.207 | 0.091 | 1.22E-42 | T cells | Adam19      |
| 8.67E-47 | 0.51955609 | 0.235 | 0.113 | 1.23E-42 | T cells | Dnajc1      |
| 8.68E-47 | 0.46746187 | 0.255 | 0.125 | 1.23E-42 | T cells | Rasa13      |
| 9.23E-47 | 0.48745536 | 0.396 | 0.248 | 1.31E-42 | T cells | Anxa6       |
| 9.27E-47 | -0.9494693 | 0.297 | 0.425 | 1.31E-42 | T cells | Ctsc        |
| 1.03E-46 | 0.365911   | 0.124 | 0.037 | 1.46E-42 | T cells | Abhd8       |
| 1.21E-46 | 0.41681427 | 0.204 | 0.089 | 1.71E-42 | T cells | Agpat3      |
| 1.70E-46 | -1.0634954 | 0.191 | 0.333 | 2.40E-42 | T cells | Ccr7        |
| 1.88E-46 | 0.49913205 | 0.326 | 0.182 | 2.67E-42 | T cells | Rhoh        |
| 1.93E-46 | 0.47919662 | 0.127 | 0.04  | 2.73E-42 | T cells | Nrgn        |
| 2.62E-46 | 0.46211487 | 0.129 | 0.04  | 3.70E-42 | T cells | Ly75        |
| 2.66E-46 | 0.50445139 | 0.532 | 0.385 | 3.77E-42 | T cells | Krtcap2     |
| 2.82E-46 | 0.5450803  | 0.372 | 0.225 | 3.99E-42 | T cells | Cd82        |
| 3.39E-46 | 0.52402509 | 0.468 | 0.311 | 4.79E-42 | T cells | Ptms        |
| 3.51E-46 | -0.6933406 | 0.045 | 0.152 | 4.97E-42 | T cells | Basp1       |
| 3.95E-46 | -0.4252334 | 0.024 | 0.118 | 5.60E-42 | T cells | Tppp3       |
| 4.48E-46 | -0.5091757 | 0.015 | 0.102 | 6.35E-42 | T cells | Rasgrp4     |
| 5.85E-46 | 0.46850997 | 0.555 | 0.406 | 8.28E-42 | T cells | Srp14       |
| 6.08E-46 | 0.50697058 | 0.157 | 0.059 | 8.60E-42 | T cells | Syt11       |
| 6.83E-46 | 0.58616082 | 0.292 | 0.157 | 9.67E-42 | T cells | Bcl2        |
| 7.28E-46 | 0.3673122  | 0.357 | 0.207 | 1.03E-41 | T cells | Socs1       |
| 7.37E-46 | -0.5746125 | 0.218 | 0.368 | 1.04E-41 | T cells | Inpp5d      |
| 8.04E-46 | -0.5045312 | 0.076 | 0.196 | 1.14E-41 | T cells | Tmem243     |
| 8.63E-46 | -0.4790407 | 0.048 | 0.158 | 1.22E-41 | T cells | Filip1l     |
| 1.03E-45 | 0.37491397 | 0.132 | 0.042 | 1.46E-41 | T cells | Nmrk1       |
| 1.34E-45 | 0.34656042 | 0.83  | 0.724 | 1.90E-41 | T cells | Eif3f       |
| 2.77E-45 | -0.7250247 | 0.257 | 0.396 | 3.92E-41 | T cells | Zfand5      |
| 3.40E-45 | -0.4119235 | 0.016 | 0.103 | 4.81E-41 | T cells | Cbfa2t3     |
| 3.72E-45 | 0.54714626 | 0.425 | 0.263 | 5.26E-41 | T cells | Ablim1      |
| 3.87E-45 | -1.1001579 | 0.092 | 0.214 | 5.47E-41 | T cells | Slc16a3     |
| 3.99E-45 | 0.60482949 | 0.45  | 0.305 | 5.65E-41 | T cells | Peli1       |
| 4.00E-45 | 0.42012368 | 0.65  | 0.509 | 5.66E-41 | T cells | Atp5c1      |
| 4.39E-45 | 0.41705401 | 0.157 | 0.058 | 6.22E-41 | T cells | Ifitm10     |
| 4.46E-45 | -0.411492  | 0.039 | 0.142 | 6.32E-41 | T cells | Mgrn1       |
| 4.60E-45 | 0.49200114 | 0.55  | 0.408 | 6.51E-41 | T cells | 1810037117R |

|          |            |       |       |          |         |            |
|----------|------------|-------|-------|----------|---------|------------|
| 6.10E-45 | 0.50369161 | 0.216 | 0.103 | 8.63E-41 | T cells | Ciapin1    |
| 6.33E-45 | -0.5544606 | 0.15  | 0.285 | 8.95E-41 | T cells | Atp6ap1    |
| 6.90E-45 | -0.4735816 | 0.018 | 0.105 | 9.77E-41 | T cells | C3ar1      |
| 8.71E-45 | -0.9009169 | 0.207 | 0.345 | 1.23E-40 | T cells | Cd44       |
| 9.14E-45 | 0.48928727 | 0.453 | 0.303 | 1.29E-40 | T cells | Pebp1      |
| 9.24E-45 | -0.4762503 | 0.038 | 0.139 | 1.31E-40 | T cells | Rassf3     |
| 9.48E-45 | 0.45948087 | 0.403 | 0.259 | 1.34E-40 | T cells | Nudt21     |
| 1.93E-44 | -0.7276892 | 0.374 | 0.503 | 2.73E-40 | T cells | Adgre5     |
| 2.27E-44 | -0.7093347 | 0.224 | 0.365 | 3.21E-40 | T cells | Snx20      |
| 3.15E-44 | 0.48054275 | 0.478 | 0.332 | 4.46E-40 | T cells | Tecr       |
| 3.95E-44 | -0.6679782 | 0.216 | 0.355 | 5.59E-40 | T cells | Tspan13    |
| 4.38E-44 | 0.40469561 | 0.711 | 0.579 | 6.20E-40 | T cells | Atp5h      |
| 4.49E-44 | 0.4937457  | 0.486 | 0.335 | 6.35E-40 | T cells | Tomm6      |
| 6.22E-44 | -0.5771679 | 0.318 | 0.452 | 8.80E-40 | T cells | Fam49b     |
| 8.50E-44 | -0.6593151 | 0.527 | 0.641 | 1.20E-39 | T cells | Nfkbia     |
| 1.04E-43 | 0.51415042 | 0.454 | 0.307 | 1.47E-39 | T cells | 7-Sep      |
| 1.24E-43 | 0.56503161 | 0.408 | 0.273 | 1.75E-39 | T cells | Gng2       |
| 1.27E-43 | 0.40000736 | 0.689 | 0.553 | 1.80E-39 | T cells | Atp5j2     |
| 1.30E-43 | -0.2971502 | 0.017 | 0.102 | 1.84E-39 | T cells | Adam15     |
| 1.30E-43 | 0.45620364 | 0.283 | 0.154 | 1.85E-39 | T cells | Tbrg1      |
| 1.50E-43 | 0.52407724 | 0.215 | 0.102 | 2.12E-39 | T cells | 5430416N02 |
| 1.51E-43 | -0.5780243 | 0.079 | 0.196 | 2.14E-39 | T cells | Nfkbie     |
| 2.74E-43 | -0.6088265 | 0.213 | 0.351 | 3.88E-39 | T cells | Man2b1     |
| 3.73E-43 | 0.43530425 | 0.655 | 0.536 | 5.27E-39 | T cells | Snrpg      |
| 4.12E-43 | 0.58077026 | 0.352 | 0.21  | 5.83E-39 | T cells | Smad7      |
| 4.29E-43 | -0.6341552 | 0.078 | 0.194 | 6.08E-39 | T cells | Dmxl1      |
| 4.75E-43 | 0.43069318 | 0.652 | 0.528 | 6.73E-39 | T cells | Atp5j      |
| 5.93E-43 | -0.4664983 | 0.047 | 0.149 | 8.39E-39 | T cells | Tubb6      |
| 8.19E-43 | -0.5025605 | 0.061 | 0.171 | 1.16E-38 | T cells | Rnf19b     |
| 9.53E-43 | 0.45359551 | 0.539 | 0.392 | 1.35E-38 | T cells | Eif3i      |
| 1.75E-42 | 0.53652765 | 0.274 | 0.147 | 2.48E-38 | T cells | Cenpa      |
| 1.79E-42 | -0.4629918 | 0.03  | 0.123 | 2.53E-38 | T cells | Ltb4r1     |
| 2.25E-42 | 0.45588734 | 0.408 | 0.267 | 3.19E-38 | T cells | Akr1b3     |
| 2.27E-42 | 0.68858643 | 0.105 | 0.029 | 3.21E-38 | T cells | Ube2c      |
| 2.63E-42 | -0.5603908 | 0.74  | 0.815 | 3.72E-38 | T cells | Btg1       |
| 3.88E-42 | 0.28664157 | 0.556 | 0.366 | 5.49E-38 | T cells | Fyb        |
| 6.01E-42 | 0.45492948 | 0.459 | 0.312 | 8.51E-38 | T cells | H2-T22     |
| 7.04E-42 | -0.6942368 | 0.081 | 0.196 | 9.96E-38 | T cells | Ckb        |
| 8.70E-42 | -0.2936504 | 0.018 | 0.101 | 1.23E-37 | T cells | Milr1      |
| 9.37E-42 | -0.4710165 | 0.058 | 0.164 | 1.33E-37 | T cells | Arap1      |
| 9.37E-42 | 0.31154253 | 0.909 | 0.848 | 1.33E-37 | T cells | Rpl36      |
| 1.11E-41 | -0.4028041 | 0.069 | 0.181 | 1.58E-37 | T cells | Cnpy3      |
| 1.16E-41 | -0.5079148 | 0.025 | 0.113 | 1.64E-37 | T cells | Trem12     |
| 1.19E-41 | -0.4780609 | 0.051 | 0.154 | 1.68E-37 | T cells | Notch2     |
| 1.67E-41 | 0.30144267 | 0.879 | 0.811 | 2.37E-37 | T cells | Rpl7       |
| 1.72E-41 | -0.3895567 | 0.019 | 0.102 | 2.43E-37 | T cells | Rab31      |
| 1.80E-41 | -0.6088883 | 0.09  | 0.207 | 2.54E-37 | T cells | Baz2b      |
| 1.98E-41 | 0.37326908 | 0.116 | 0.036 | 2.80E-37 | T cells | Abcb9      |



|          |            |       |       |          |         |           |
|----------|------------|-------|-------|----------|---------|-----------|
| 2.04E-41 | -0.5708677 | 0.102 | 0.221 | 2.89E-37 | T cells | Nadk      |
| 2.33E-41 | 0.47272931 | 0.106 | 0.031 | 3.29E-37 | T cells | Tbc1d4    |
| 3.28E-41 | -0.3126951 | 0.021 | 0.105 | 4.64E-37 | T cells | Acvrl1    |
| 3.65E-41 | 0.40291684 | 0.576 | 0.424 | 5.16E-37 | T cells | Rnaset2a  |
| 4.53E-41 | 0.45031498 | 0.622 | 0.497 | 6.41E-37 | T cells | Edf1      |
| 5.20E-41 | -0.4725483 | 0.091 | 0.209 | 7.37E-37 | T cells | Bcl3      |
| 5.54E-41 | -0.7172006 | 0.122 | 0.243 | 7.85E-37 | T cells | Pmaip1    |
| 6.27E-41 | 0.419444   | 0.629 | 0.497 | 8.87E-37 | T cells | Serbp1    |
| 6.85E-41 | -0.3790499 | 0.038 | 0.134 | 9.69E-37 | T cells | Sgk3      |
| 7.10E-41 | 0.5378055  | 0.154 | 0.062 | 1.00E-36 | T cells | Smc2      |
| 9.42E-41 | 0.4386821  | 0.318 | 0.184 | 1.33E-36 | T cells | Psip1     |
| 1.16E-40 | 0.93434159 | 0.429 | 0.304 | 1.65E-36 | T cells | Itgb1     |
| 1.21E-40 | 0.35238213 | 0.105 | 0.031 | 1.71E-36 | T cells | Fam78a    |
| 1.67E-40 | 0.29918995 | 0.1   | 0.028 | 2.37E-36 | T cells | Rcn1      |
| 2.18E-40 | -0.4924776 | 0.039 | 0.133 | 3.09E-36 | T cells | Rab20     |
| 2.54E-40 | 0.41161024 | 0.381 | 0.237 | 3.60E-36 | T cells | Acp5      |
| 3.80E-40 | 0.66722388 | 0.261 | 0.145 | 5.38E-36 | T cells | Gramd3    |
| 4.09E-40 | -0.4748902 | 0.07  | 0.179 | 5.78E-36 | T cells | Mpp1      |
| 4.58E-40 | -0.4841949 | 0.099 | 0.217 | 6.48E-36 | T cells | Tm6sf1    |
| 6.25E-40 | -0.3128563 | 0.032 | 0.122 | 8.85E-36 | T cells | Tep1      |
| 8.98E-40 | -0.5084282 | 0.138 | 0.266 | 1.27E-35 | T cells | Runx1     |
| 1.26E-39 | -0.5134986 | 0.046 | 0.144 | 1.79E-35 | T cells | Gla       |
| 1.27E-39 | -0.6353658 | 0.222 | 0.35  | 1.80E-35 | T cells | Ncf4      |
| 1.46E-39 | 0.42546036 | 0.211 | 0.101 | 2.07E-35 | T cells | Cdk17     |
| 1.48E-39 | 0.64295279 | 0.243 | 0.131 | 2.09E-35 | T cells | AU020206  |
| 1.64E-39 | 0.53480698 | 0.321 | 0.191 | 2.33E-35 | T cells | Ankrd12   |
| 2.31E-39 | -0.3677466 | 0.039 | 0.132 | 3.26E-35 | T cells | Qk        |
| 2.38E-39 | -0.5562716 | 0.221 | 0.356 | 3.37E-35 | T cells | Smim14    |
| 2.70E-39 | 0.35679035 | 0.127 | 0.045 | 3.82E-35 | T cells | Osbpl3    |
| 3.19E-39 | 0.29204225 | 0.105 | 0.031 | 4.51E-35 | T cells | Xlr4b     |
| 3.49E-39 | -0.3917835 | 0.03  | 0.117 | 4.95E-35 | T cells | Bmp2k     |
| 4.32E-39 | 0.42067476 | 0.549 | 0.408 | 6.12E-35 | T cells | Gabarapl2 |
| 7.15E-39 | 0.68797219 | 0.238 | 0.13  | 1.01E-34 | T cells | Nrp1      |
| 7.44E-39 | 0.52671323 | 0.284 | 0.162 | 1.05E-34 | T cells | Itpkb     |
| 8.57E-39 | -0.9218336 | 0.489 | 0.566 | 1.21E-34 | T cells | Taldo1    |
| 1.20E-38 | 0.44976605 | 0.44  | 0.303 | 1.70E-34 | T cells | Ostc      |
| 1.23E-38 | 0.39756171 | 0.483 | 0.345 | 1.74E-34 | T cells | Ndufv3    |
| 1.33E-38 | 0.3846504  | 0.6   | 0.467 | 1.88E-34 | T cells | Psmb1     |
| 1.77E-38 | 0.53789646 | 0.245 | 0.131 | 2.51E-34 | T cells | Uhrf2     |
| 1.90E-38 | -0.2938463 | 0.025 | 0.109 | 2.69E-34 | T cells | Plod3     |
| 2.84E-38 | 0.40663592 | 0.465 | 0.325 | 4.01E-34 | T cells | Eif3m     |
| 3.22E-38 | 0.43765868 | 0.292 | 0.166 | 4.56E-34 | T cells | 6-Sep     |
| 3.60E-38 | -0.3303831 | 0.022 | 0.103 | 5.10E-34 | T cells | Rab7b     |
| 3.65E-38 | 0.66005138 | 0.346 | 0.217 | 5.17E-34 | T cells | Bhlhe40   |
| 4.30E-38 | 0.39151505 | 0.631 | 0.503 | 6.09E-34 | T cells | Tma7      |
| 4.61E-38 | 0.42502586 | 0.131 | 0.048 | 6.53E-34 | T cells | Atp2b4    |
| 4.89E-38 | -0.5044577 | 0.067 | 0.171 | 6.93E-34 | T cells | Nampt     |
| 5.39E-38 | 0.36989819 | 0.696 | 0.572 | 7.63E-34 | T cells | Nsa2      |

|          |            |       |       |          |         |           |
|----------|------------|-------|-------|----------|---------|-----------|
| 6.88E-38 | -1.0135577 | 0.155 | 0.277 | 9.74E-34 | T cells | Nfkbiz    |
| 8.96E-38 | -0.7011761 | 0.157 | 0.272 | 1.27E-33 | T cells | Ptp4a3    |
| 9.59E-38 | -0.3076783 | 0.025 | 0.106 | 1.36E-33 | T cells | Ralb      |
| 9.91E-38 | 0.4357144  | 0.433 | 0.297 | 1.40E-33 | T cells | Higd1a    |
| 1.09E-37 | 0.49174496 | 0.289 | 0.173 | 1.55E-33 | T cells | Rnf166    |
| 1.16E-37 | -0.5173552 | 0.092 | 0.204 | 1.65E-33 | T cells | Sbno2     |
| 1.62E-37 | -0.3469804 | 0.031 | 0.117 | 2.29E-33 | T cells | Tnfrsf13b |
| 1.66E-37 | 0.46076381 | 0.201 | 0.098 | 2.35E-33 | T cells | Tecpr1    |
| 1.76E-37 | -0.3272189 | 0.023 | 0.103 | 2.49E-33 | T cells | Slc31a2   |
| 1.77E-37 | 0.49023089 | 0.188 | 0.091 | 2.50E-33 | T cells | Ptpn7     |
| 2.76E-37 | 0.43043279 | 0.487 | 0.352 | 3.91E-33 | T cells | Park7     |
| 2.77E-37 | -0.5252255 | 0.168 | 0.291 | 3.93E-33 | T cells | Epn1      |
| 3.38E-37 | -0.7143879 | 0.672 | 0.734 | 4.78E-33 | T cells | Btg2      |
| 3.42E-37 | -0.5577076 | 0.086 | 0.194 | 4.84E-33 | T cells | Tcirg1    |
| 4.31E-37 | -0.6336135 | 0.293 | 0.408 | 6.10E-33 | T cells | Capza2    |
| 4.31E-37 | -0.4387672 | 0.034 | 0.121 | 6.10E-33 | T cells | Mtss1     |
| 4.50E-37 | 0.42269273 | 0.163 | 0.071 | 6.38E-33 | T cells | Frat2     |
| 5.45E-37 | 0.42594557 | 0.358 | 0.233 | 7.72E-33 | T cells | Cox20     |
| 5.47E-37 | 0.44058345 | 0.208 | 0.103 | 7.74E-33 | T cells | Phf6      |
| 7.12E-37 | 0.32162396 | 0.913 | 0.877 | 1.01E-32 | T cells | Cfl1      |
| 7.45E-37 | -0.7569193 | 0.273 | 0.393 | 1.05E-32 | T cells | Adipor1   |
| 8.76E-37 | -0.2865153 | 0.028 | 0.111 | 1.24E-32 | T cells | Slc15a4   |
| 1.03E-36 | 0.68317563 | 0.361 | 0.24  | 1.46E-32 | T cells | Emb       |
| 1.10E-36 | 0.27258746 | 0.193 | 0.089 | 1.56E-32 | T cells | Gm19585   |
| 1.12E-36 | 0.41368832 | 0.171 | 0.078 | 1.59E-32 | T cells | Padi2     |
| 1.23E-36 | 0.36545718 | 0.457 | 0.309 | 1.75E-32 | T cells | Bcl2a1b   |
| 1.25E-36 | -0.5967066 | 0.219 | 0.348 | 1.76E-32 | T cells | Tmod3     |
| 1.35E-36 | -0.4919377 | 0.105 | 0.217 | 1.91E-32 | T cells | Snx9      |
| 1.51E-36 | 0.37945314 | 0.297 | 0.176 | 2.14E-32 | T cells | Bola3     |
| 2.19E-36 | 0.40154898 | 0.131 | 0.05  | 3.11E-32 | T cells | Lig1      |
| 2.36E-36 | -0.466807  | 0.133 | 0.253 | 3.35E-32 | T cells | Uvrag     |
| 2.78E-36 | 0.59168404 | 0.256 | 0.145 | 3.94E-32 | T cells | Ptpn11    |
| 3.35E-36 | 0.64712256 | 0.125 | 0.047 | 4.74E-32 | T cells | Hist1h2ao |
| 4.32E-36 | -0.5036635 | 0.083 | 0.187 | 6.11E-32 | T cells | Pxk       |
| 4.51E-36 | 0.42286065 | 0.149 | 0.062 | 6.38E-32 | T cells | Rnf19a    |
| 5.32E-36 | 0.80479159 | 0.602 | 0.497 | 7.54E-32 | T cells | Hmgb2     |
| 6.53E-36 | 0.43742162 | 0.384 | 0.253 | 9.24E-32 | T cells | Glrx      |
| 6.54E-36 | -0.5314989 | 0.043 | 0.131 | 9.26E-32 | T cells | Dusp16    |
| 7.56E-36 | 0.46898817 | 0.48  | 0.352 | 1.07E-31 | T cells | Spcs2     |
| 9.20E-36 | 0.32528189 | 0.128 | 0.048 | 1.30E-31 | T cells | Il27ra    |
| 9.29E-36 | 0.29054026 | 0.105 | 0.034 | 1.32E-31 | T cells | Racgap1   |
| 1.30E-35 | -0.4717455 | 0.044 | 0.133 | 1.84E-31 | T cells | Tmcc1     |
| 1.41E-35 | -0.4631551 | 0.085 | 0.191 | 1.99E-31 | T cells | Rara      |
| 1.54E-35 | 0.3415889  | 0.14  | 0.056 | 2.18E-31 | T cells | Rab3ip    |
| 1.77E-35 | 0.41638641 | 0.313 | 0.193 | 2.51E-31 | T cells | Fam173a   |
| 1.78E-35 | -0.5252745 | 0.494 | 0.602 | 2.52E-31 | T cells | Rap1b     |
| 2.38E-35 | 0.37637516 | 0.194 | 0.096 | 3.37E-31 | T cells | Ebpl      |
| 3.27E-35 | -0.6349999 | 0.169 | 0.288 | 4.63E-31 | T cells | Tiparp    |

|          |            |       |       |          |         |          |
|----------|------------|-------|-------|----------|---------|----------|
| 4.71E-35 | -0.4831685 | 0.119 | 0.233 | 6.66E-31 | T cells | Cd86     |
| 5.25E-35 | 0.39323137 | 0.145 | 0.061 | 7.43E-31 | T cells | Ipcef1   |
| 5.76E-35 | 0.42323336 | 0.623 | 0.504 | 8.15E-31 | T cells | Ndufa4   |
| 5.81E-35 | 0.51925585 | 0.404 | 0.273 | 8.22E-31 | T cells | Rapgef6  |
| 5.90E-35 | -0.6092036 | 0.106 | 0.216 | 8.36E-31 | T cells | Gadd45g  |
| 6.10E-35 | -0.4741974 | 0.04  | 0.126 | 8.63E-31 | T cells | Tmem176a |
| 6.29E-35 | 0.54181238 | 0.319 | 0.201 | 8.91E-31 | T cells | Runx3    |
| 6.63E-35 | 0.34013177 | 0.184 | 0.085 | 9.38E-31 | T cells | Gimap8   |
| 7.42E-35 | -0.5944468 | 0.163 | 0.28  | 1.05E-30 | T cells | Per1     |
| 9.12E-35 | -0.5652868 | 0.219 | 0.345 | 1.29E-30 | T cells | Tgif1    |
| 1.05E-34 | 0.34304588 | 0.172 | 0.077 | 1.49E-30 | T cells | Jakmip1  |
| 1.11E-34 | 0.4718072  | 0.45  | 0.325 | 1.57E-30 | T cells | Nme1     |
| 1.13E-34 | 0.25497984 | 0.114 | 0.041 | 1.60E-30 | T cells | Pacsin1  |
| 1.19E-34 | -0.6207919 | 0.768 | 0.787 | 1.68E-30 | T cells | Jund     |
| 1.28E-34 | 0.38398711 | 0.38  | 0.248 | 1.81E-30 | T cells | Pttg1    |
| 1.68E-34 | 0.34980159 | 0.202 | 0.1   | 2.38E-30 | T cells | Rhof     |
| 2.22E-34 | -0.3896352 | 0.059 | 0.155 | 3.14E-30 | T cells | Bach1    |
| 3.52E-34 | 0.39158577 | 0.275 | 0.157 | 4.98E-30 | T cells | Spn      |
| 4.38E-34 | 0.43677487 | 0.396 | 0.276 | 6.20E-30 | T cells | Tmem160  |
| 4.49E-34 | -0.6024737 | 0.081 | 0.178 | 6.35E-30 | T cells | Bach2    |
| 4.57E-34 | 0.30583413 | 0.917 | 0.878 | 6.47E-30 | T cells | Rpl39    |
| 5.12E-34 | -0.3772867 | 0.04  | 0.124 | 7.25E-30 | T cells | Tfeb     |
| 5.88E-34 | 0.50461391 | 0.286 | 0.172 | 8.32E-30 | T cells | Cast     |
| 7.17E-34 | 0.40646724 | 0.46  | 0.329 | 1.01E-29 | T cells | BC031181 |
| 8.69E-34 | 0.35956905 | 0.323 | 0.202 | 1.23E-29 | T cells | Lsm8     |
| 1.10E-33 | -0.3508072 | 0.098 | 0.211 | 1.56E-29 | T cells | Ifngr2   |
| 1.11E-33 | -0.5087619 | 0.179 | 0.297 | 1.57E-29 | T cells | Mtpn     |
| 1.11E-33 | 0.33594177 | 0.32  | 0.191 | 1.57E-29 | T cells | Tbc1d10c |
| 1.18E-33 | 0.39831967 | 0.181 | 0.089 | 1.67E-29 | T cells | Jak3     |
| 1.18E-33 | 0.53939567 | 0.28  | 0.169 | 1.67E-29 | T cells | Hopx     |
| 1.95E-33 | 0.37865854 | 0.502 | 0.372 | 2.75E-29 | T cells | Spcs1    |
| 2.07E-33 | 0.40124423 | 0.342 | 0.222 | 2.92E-29 | T cells | Sugt1    |
| 2.07E-33 | -0.3774827 | 0.051 | 0.14  | 2.93E-29 | T cells | Irf2bp2  |
| 2.27E-33 | 0.35260535 | 0.256 | 0.145 | 3.21E-29 | T cells | Pop5     |
| 2.45E-33 | 0.30285622 | 0.131 | 0.053 | 3.47E-29 | T cells | Stk26    |
| 3.33E-33 | 0.4108792  | 0.48  | 0.352 | 4.71E-29 | T cells | Med28    |
| 3.55E-33 | 0.28607906 | 0.138 | 0.057 | 5.02E-29 | T cells | Cmc2     |
| 3.64E-33 | 0.44078942 | 0.215 | 0.116 | 5.15E-29 | T cells | Casp3    |
| 4.23E-33 | 0.38223709 | 0.513 | 0.392 | 5.99E-29 | T cells | Snrpf    |
| 4.73E-33 | 0.39886807 | 0.167 | 0.079 | 6.70E-29 | T cells | Ppm1h    |
| 4.99E-33 | -0.4172065 | 0.069 | 0.164 | 7.06E-29 | T cells | Neu1     |
| 5.17E-33 | 0.42447869 | 0.327 | 0.211 | 7.32E-29 | T cells | Lcp2     |
| 5.31E-33 | 0.42660632 | 0.376 | 0.257 | 7.52E-29 | T cells | Mrpl4    |
| 5.76E-33 | -0.5144633 | 0.106 | 0.211 | 8.15E-29 | T cells | Trafd1   |
| 7.44E-33 | 0.47933932 | 0.252 | 0.144 | 1.05E-28 | T cells | Nr4a3    |
| 9.06E-33 | 0.36093248 | 0.347 | 0.227 | 1.28E-28 | T cells | Cyb5a    |
| 9.30E-33 | 0.35434493 | 0.212 | 0.112 | 1.32E-28 | T cells | Mri1     |
| 9.99E-33 | -0.6886582 | 0.16  | 0.274 | 1.41E-28 | T cells | Nfkbid   |

|          |            |       |       |          |         |             |
|----------|------------|-------|-------|----------|---------|-------------|
| 1.24E-32 | 0.51012733 | 0.322 | 0.209 | 1.76E-28 | T cells | Prex1       |
| 1.61E-32 | 0.3581859  | 0.165 | 0.078 | 2.28E-28 | T cells | Gmnn        |
| 1.81E-32 | 0.38333636 | 0.59  | 0.474 | 2.57E-28 | T cells | Polr1d      |
| 1.93E-32 | 0.38542667 | 0.592 | 0.485 | 2.73E-28 | T cells | Snrpe       |
| 2.15E-32 | -0.5618039 | 0.262 | 0.385 | 3.05E-28 | T cells | mt-Nd3      |
| 2.21E-32 | 0.36141302 | 0.105 | 0.037 | 3.13E-28 | T cells | Tnik        |
| 2.36E-32 | 0.41737197 | 0.175 | 0.087 | 3.34E-28 | T cells | Impa2       |
| 2.51E-32 | 0.39039343 | 0.274 | 0.167 | 3.55E-28 | T cells | Exosc8      |
| 2.60E-32 | 0.29405616 | 0.106 | 0.038 | 3.68E-28 | T cells | Cdkn2c      |
| 2.75E-32 | 0.40462079 | 0.143 | 0.062 | 3.89E-28 | T cells | Atad2       |
| 2.89E-32 | 0.40613416 | 0.485 | 0.357 | 4.09E-28 | T cells | Tmed9       |
| 2.94E-32 | 0.26768974 | 0.857 | 0.801 | 4.17E-28 | T cells | Rpl22       |
| 3.03E-32 | -0.5006714 | 0.119 | 0.227 | 4.28E-28 | T cells | Ptpre       |
| 3.15E-32 | -0.3351972 | 0.029 | 0.104 | 4.46E-28 | T cells | Myo5a       |
| 3.35E-32 | -0.4432257 | 0.064 | 0.155 | 4.75E-28 | T cells | Casp4       |
| 3.68E-32 | -0.4861082 | 0.229 | 0.349 | 5.21E-28 | T cells | Atp6v0d1    |
| 4.43E-32 | -0.4822545 | 0.033 | 0.109 | 6.27E-28 | T cells | Btla        |
| 4.81E-32 | 0.25492338 | 0.887 | 0.842 | 6.81E-28 | T cells | Rps12       |
| 5.01E-32 | 0.28317323 | 0.136 | 0.057 | 7.09E-28 | T cells | Slc22a15    |
| 5.04E-32 | 0.48783871 | 0.298 | 0.185 | 7.13E-28 | T cells | Cblb        |
| 5.35E-32 | 0.50272288 | 0.363 | 0.245 | 7.57E-28 | T cells | Gch1        |
| 5.37E-32 | 0.39267146 | 0.261 | 0.148 | 7.60E-28 | T cells | Stat4       |
| 7.61E-32 | 0.30385849 | 0.83  | 0.757 | 1.08E-27 | T cells | Cox8a       |
| 7.65E-32 | 0.43229155 | 0.16  | 0.073 | 1.08E-27 | T cells | Plcx2       |
| 8.31E-32 | -0.3481675 | 0.079 | 0.177 | 1.18E-27 | T cells | Etv6        |
| 1.19E-31 | -0.3325222 | 0.061 | 0.152 | 1.68E-27 | T cells | Cd2ap       |
| 1.20E-31 | -0.5318943 | 0.727 | 0.755 | 1.69E-27 | T cells | Ubc         |
| 1.40E-31 | -1.091294  | 0.237 | 0.346 | 1.98E-27 | T cells | Grina       |
| 2.02E-31 | -0.4622051 | 0.119 | 0.225 | 2.86E-27 | T cells | Pten        |
| 2.14E-31 | 0.32917794 | 0.835 | 0.762 | 3.03E-27 | T cells | Rpl36a      |
| 2.26E-31 | -0.3970158 | 0.091 | 0.191 | 3.20E-27 | T cells | Irak2       |
| 2.54E-31 | -0.7099164 | 0.053 | 0.137 | 3.59E-27 | T cells | Tsc22d1     |
| 3.03E-31 | 0.32096802 | 0.713 | 0.625 | 4.30E-27 | T cells | Rpl23a      |
| 3.51E-31 | 0.42302782 | 0.117 | 0.046 | 4.97E-27 | T cells | Il18r1      |
| 3.81E-31 | -0.44018   | 0.087 | 0.183 | 5.39E-27 | T cells | Map2k1      |
| 4.32E-31 | 0.30697894 | 0.713 | 0.598 | 6.11E-27 | T cells | Limd2       |
| 4.45E-31 | 0.58906323 | 0.238 | 0.138 | 6.30E-27 | T cells | Itgav       |
| 4.61E-31 | 0.33407834 | 0.33  | 0.214 | 6.53E-27 | T cells | Churc1      |
| 4.74E-31 | 0.28360568 | 0.821 | 0.716 | 6.71E-27 | T cells | Rpl36al     |
| 6.66E-31 | -0.6418999 | 0.511 | 0.589 | 9.42E-27 | T cells | Zfp36l1     |
| 6.76E-31 | -0.4596985 | 0.163 | 0.275 | 9.57E-27 | T cells | Camk2d      |
| 7.37E-31 | 0.34871894 | 0.127 | 0.053 | 1.04E-26 | T cells | Hacd3       |
| 1.03E-30 | 0.39158632 | 0.144 | 0.065 | 1.46E-26 | T cells | Runx2       |
| 1.11E-30 | 0.51615163 | 0.243 | 0.141 | 1.57E-26 | T cells | Nrip1       |
| 1.41E-30 | 0.45692867 | 0.246 | 0.142 | 2.00E-26 | T cells | 4932438A13f |
| 1.49E-30 | 0.38768262 | 0.421 | 0.301 | 2.11E-26 | T cells | Ssb         |
| 1.82E-30 | 0.35950329 | 0.144 | 0.065 | 2.57E-26 | T cells | Aebp2       |
| 2.51E-30 | 0.39470285 | 0.768 | 0.694 | 3.56E-26 | T cells | Clic1       |

|          |            |       |       |          |         |          |
|----------|------------|-------|-------|----------|---------|----------|
| 2.64E-30 | -0.3170396 | 0.036 | 0.112 | 3.74E-26 | T cells | Dennd5a  |
| 2.75E-30 | -0.6413518 | 0.078 | 0.167 | 3.90E-26 | T cells | Ms4a6d   |
| 3.08E-30 | 0.41116155 | 0.379 | 0.264 | 4.36E-26 | T cells | Nt5c     |
| 3.12E-30 | -0.4817255 | 0.078 | 0.172 | 4.41E-26 | T cells | Lmna     |
| 3.94E-30 | -0.4966919 | 0.113 | 0.214 | 5.58E-26 | T cells | Zc3h12a  |
| 4.28E-30 | -0.5734394 | 0.146 | 0.25  | 6.07E-26 | T cells | Herpud1  |
| 5.20E-30 | -0.4293052 | 0.078 | 0.171 | 7.36E-26 | T cells | Dstn     |
| 5.48E-30 | 0.39419585 | 0.2   | 0.106 | 7.76E-26 | T cells | Rasgrp1  |
| 7.03E-30 | 0.41447361 | 0.111 | 0.044 | 9.96E-26 | T cells | Cks1b    |
| 8.35E-30 | -0.3230696 | 0.047 | 0.128 | 1.18E-25 | T cells | Tec      |
| 9.23E-30 | -0.4034617 | 0.061 | 0.147 | 1.31E-25 | T cells | Snx10    |
| 1.20E-29 | 0.39672366 | 0.354 | 0.243 | 1.69E-25 | T cells | Mrps16   |
| 1.36E-29 | 0.51103559 | 0.273 | 0.17  | 1.92E-25 | T cells | Mxd4     |
| 1.49E-29 | 0.36948104 | 0.16  | 0.078 | 2.12E-25 | T cells | Prr7     |
| 1.53E-29 | 0.33308299 | 0.596 | 0.473 | 2.16E-25 | T cells | Ube2i    |
| 1.57E-29 | 0.42286532 | 0.302 | 0.196 | 2.22E-25 | T cells | 9-Sep    |
| 2.23E-29 | 0.33387659 | 0.175 | 0.088 | 3.16E-25 | T cells | Hdac7    |
| 3.24E-29 | 0.32954873 | 0.105 | 0.04  | 4.59E-25 | T cells | Hells    |
| 3.98E-29 | 0.27415533 | 0.11  | 0.042 | 5.63E-25 | T cells | Pced1b   |
| 4.29E-29 | 1.35955958 | 0.107 | 0.042 | 6.07E-25 | T cells | Areg     |
| 4.61E-29 | 0.61028997 | 0.208 | 0.119 | 6.52E-25 | T cells | Havcr2   |
| 5.43E-29 | 0.36172907 | 0.498 | 0.383 | 7.69E-25 | T cells | Ndufb7   |
| 5.73E-29 | 0.4030928  | 0.234 | 0.134 | 8.11E-25 | T cells | Srpk2    |
| 5.98E-29 | -0.370946  | 0.061 | 0.146 | 8.47E-25 | T cells | Dram2    |
| 6.04E-29 | -0.427922  | 0.093 | 0.188 | 8.55E-25 | T cells | Myd88    |
| 6.11E-29 | 0.39140501 | 0.209 | 0.116 | 8.65E-25 | T cells | Prkacb   |
| 6.42E-29 | 0.41082757 | 0.15  | 0.072 | 9.09E-25 | T cells | Cish     |
| 8.06E-29 | 0.36004208 | 0.327 | 0.217 | 1.14E-24 | T cells | Mrpl18   |
| 1.08E-28 | 0.37941645 | 0.542 | 0.43  | 1.53E-24 | T cells | Prkar1a  |
| 1.18E-28 | 0.37347951 | 0.141 | 0.065 | 1.67E-24 | T cells | Ttc3     |
| 1.35E-28 | 0.3901911  | 0.144 | 0.068 | 1.92E-24 | T cells | Zbtb38   |
| 1.53E-28 | 0.36333413 | 0.473 | 0.359 | 2.17E-24 | T cells | Mdh1     |
| 1.63E-28 | 0.31917635 | 0.677 | 0.558 | 2.31E-24 | T cells | Sec61b   |
| 1.66E-28 | -0.7949915 | 0.223 | 0.325 | 2.36E-24 | T cells | Socs3    |
| 2.02E-28 | -0.4186025 | 0.091 | 0.183 | 2.86E-24 | T cells | Mapkapk2 |
| 2.15E-28 | -1.2267921 | 0.136 | 0.23  | 3.04E-24 | T cells | Mt1      |
| 2.38E-28 | 0.42435333 | 0.401 | 0.284 | 3.37E-24 | T cells | Stk4     |
| 2.42E-28 | -0.4855479 | 0.1   | 0.192 | 3.43E-24 | T cells | Man1a    |
| 2.59E-28 | -0.4063184 | 0.039 | 0.111 | 3.67E-24 | T cells | Cyb561a3 |
| 2.65E-28 | -0.4821095 | 0.1   | 0.195 | 3.75E-24 | T cells | Pgd      |
| 2.77E-28 | -0.598592  | 0.337 | 0.433 | 3.92E-24 | T cells | Atp6v1g1 |
| 2.83E-28 | 0.29550052 | 0.857 | 0.82  | 4.01E-24 | T cells | Arhgdib  |
| 3.78E-28 | -0.4017692 | 0.171 | 0.281 | 5.35E-24 | T cells | Ikbkb    |
| 3.97E-28 | 0.35651625 | 0.27  | 0.168 | 5.62E-24 | T cells | Acadl    |
| 4.34E-28 | 0.30624058 | 0.988 | 0.992 | 6.15E-24 | T cells | Actb     |
| 5.02E-28 | 0.33635157 | 0.3   | 0.195 | 7.10E-24 | T cells | Ntan1    |
| 6.42E-28 | 0.36181172 | 0.145 | 0.069 | 9.09E-24 | T cells | Ezh2     |
| 6.99E-28 | -0.3093062 | 0.053 | 0.133 | 9.89E-24 | T cells | Dnase2a  |

|          |            |       |       |          |         |          |
|----------|------------|-------|-------|----------|---------|----------|
| 7.44E-28 | 0.49419575 | 0.437 | 0.325 | 1.05E-23 | T cells | Atp1b3   |
| 9.71E-28 | 0.279071   | 0.739 | 0.615 | 1.37E-23 | T cells | Psme1    |
| 1.19E-27 | 0.7911586  | 0.249 | 0.157 | 1.68E-23 | T cells | Stmn1    |
| 1.39E-27 | -0.5467993 | 0.097 | 0.189 | 1.96E-23 | T cells | Fbxl5    |
| 1.42E-27 | 0.43836412 | 0.514 | 0.391 | 2.00E-23 | T cells | Tpr      |
| 1.46E-27 | -0.4064176 | 0.142 | 0.244 | 2.06E-23 | T cells | Ehd4     |
| 1.69E-27 | 0.32375796 | 0.239 | 0.143 | 2.39E-23 | T cells | Dpy30    |
| 1.76E-27 | -0.342956  | 0.082 | 0.172 | 2.50E-23 | T cells | Gyg      |
| 1.95E-27 | 0.37179478 | 0.25  | 0.155 | 2.76E-23 | T cells | Nans     |
| 2.00E-27 | -0.3101817 | 0.967 | 0.957 | 2.83E-23 | T cells | H3f3b    |
| 2.36E-27 | 0.41697922 | 0.28  | 0.18  | 3.34E-23 | T cells | Mrps36   |
| 2.86E-27 | -0.5357486 | 0.141 | 0.239 | 4.05E-23 | T cells | Ptp4a1   |
| 3.10E-27 | 0.40051861 | 0.304 | 0.203 | 4.40E-23 | T cells | Ebp      |
| 4.26E-27 | 0.3297997  | 0.132 | 0.06  | 6.04E-23 | T cells | Mkrn2    |
| 4.55E-27 | -0.4243441 | 0.166 | 0.271 | 6.44E-23 | T cells | Fuca1    |
| 4.74E-27 | 0.36150743 | 0.421 | 0.307 | 6.71E-23 | T cells | Txn2     |
| 6.05E-27 | 0.33081235 | 0.253 | 0.155 | 8.57E-23 | T cells | Fyn      |
| 6.20E-27 | 0.41287711 | 0.231 | 0.139 | 8.78E-23 | T cells | Tmem126a |
| 7.24E-27 | 0.29321433 | 0.102 | 0.04  | 1.03E-22 | T cells | Ncapd3   |
| 8.13E-27 | 0.35364587 | 0.641 | 0.54  | 1.15E-22 | T cells | Cox5a    |
| 1.12E-26 | 0.31719743 | 0.15  | 0.074 | 1.59E-22 | T cells | Agfg1    |
| 1.16E-26 | 0.35757083 | 0.234 | 0.141 | 1.64E-22 | T cells | Pam16    |
| 1.17E-26 | 0.35650798 | 0.194 | 0.108 | 1.66E-22 | T cells | Pigp     |
| 1.35E-26 | 0.26269036 | 0.961 | 0.927 | 1.91E-22 | T cells | Rps24    |
| 1.56E-26 | 0.34841176 | 0.149 | 0.073 | 2.20E-22 | T cells | Aak1     |
| 1.58E-26 | -0.3013634 | 0.05  | 0.126 | 2.24E-22 | T cells | Naga     |
| 2.06E-26 | -0.6410605 | 0.215 | 0.316 | 2.92E-22 | T cells | Csrnp1   |
| 2.20E-26 | 0.34680533 | 0.688 | 0.602 | 3.12E-22 | T cells | Ppp1ca   |
| 2.35E-26 | 0.28963785 | 0.126 | 0.057 | 3.33E-22 | T cells | Wdyhv1   |
| 2.83E-26 | 0.37982258 | 0.287 | 0.184 | 4.01E-22 | T cells | Arhgap31 |
| 2.84E-26 | 0.5558042  | 0.475 | 0.374 | 4.02E-22 | T cells | Tubb5    |
| 2.85E-26 | -0.3609141 | 0.053 | 0.129 | 4.03E-22 | T cells | Fbxo11   |
| 2.88E-26 | -1.561526  | 0.416 | 0.491 | 4.07E-22 | T cells | Hspa1a   |
| 3.41E-26 | -0.4232275 | 0.077 | 0.162 | 4.83E-22 | T cells | Xdh      |
| 3.50E-26 | -0.5381165 | 0.054 | 0.129 | 4.95E-22 | T cells | Gadd45a  |
| 3.67E-26 | -0.3202036 | 0.043 | 0.114 | 5.20E-22 | T cells | Lpcat1   |
| 4.49E-26 | 0.25695189 | 0.131 | 0.061 | 6.35E-22 | T cells | Gnpda2   |
| 4.94E-26 | -0.5156772 | 0.199 | 0.302 | 6.99E-22 | T cells | Ppp1r2   |
| 5.66E-26 | -0.3628259 | 0.087 | 0.178 | 8.02E-22 | T cells | Il6ra    |
| 5.68E-26 | -0.3677955 | 0.066 | 0.146 | 8.03E-22 | T cells | Synj1    |
| 5.72E-26 | -0.3422428 | 0.086 | 0.174 | 8.09E-22 | T cells | Rnf13    |
| 5.98E-26 | 0.31253067 | 0.929 | 0.909 | 8.46E-22 | T cells | Cd52     |
| 6.25E-26 | 0.31396197 | 0.511 | 0.387 | 8.85E-22 | T cells | Psmb9    |
| 6.37E-26 | -0.465083  | 0.251 | 0.354 | 9.02E-22 | T cells | Csk      |
| 6.84E-26 | -0.3379416 | 0.095 | 0.184 | 9.69E-22 | T cells | Nfkb2    |
| 7.49E-26 | -0.4415736 | 0.172 | 0.273 | 1.06E-21 | T cells | Fam174a  |
| 8.20E-26 | 0.254637   | 0.145 | 0.07  | 1.16E-21 | T cells | Dtd1     |
| 9.45E-26 | -0.3140146 | 0.055 | 0.131 | 1.34E-21 | T cells | Ccdc86   |

|          |            |       |       |          |         |           |
|----------|------------|-------|-------|----------|---------|-----------|
| 1.01E-25 | 0.39164017 | 0.363 | 0.257 | 1.43E-21 | T cells | Tsn       |
| 1.15E-25 | -0.458133  | 0.107 | 0.197 | 1.63E-21 | T cells | Slc6a6    |
| 1.18E-25 | 0.32010015 | 0.549 | 0.439 | 1.67E-21 | T cells | Psma2     |
| 1.26E-25 | -0.5124971 | 0.263 | 0.362 | 1.79E-21 | T cells | Rrbp1     |
| 1.51E-25 | -0.4272491 | 0.499 | 0.569 | 2.14E-21 | T cells | Gnb2      |
| 1.57E-25 | 0.34409962 | 0.158 | 0.081 | 2.23E-21 | T cells | Crbn      |
| 1.67E-25 | 0.43585332 | 0.248 | 0.153 | 2.36E-21 | T cells | Cntrl     |
| 2.18E-25 | -0.315639  | 0.066 | 0.146 | 3.08E-21 | T cells | Oas1a     |
| 2.21E-25 | 0.36137499 | 0.328 | 0.226 | 3.13E-21 | T cells | Aimp1     |
| 2.33E-25 | 0.25695289 | 0.115 | 0.051 | 3.30E-21 | T cells | Ssbp3     |
| 2.75E-25 | 0.31872663 | 0.146 | 0.071 | 3.90E-21 | T cells | Trim59    |
| 2.82E-25 | 0.31090091 | 0.142 | 0.069 | 3.99E-21 | T cells | Dbf4      |
| 3.49E-25 | 0.40174709 | 0.355 | 0.251 | 4.94E-21 | T cells | Ralbp1    |
| 3.55E-25 | 0.31317831 | 0.225 | 0.133 | 5.02E-21 | T cells | Fam3c     |
| 4.03E-25 | -0.4896792 | 0.143 | 0.238 | 5.70E-21 | T cells | Ppt1      |
| 4.15E-25 | 0.31735545 | 0.151 | 0.078 | 5.87E-21 | T cells | Mphosph6  |
| 4.20E-25 | -0.4542488 | 0.037 | 0.103 | 5.94E-21 | T cells | Smox      |
| 4.42E-25 | 0.45449198 | 0.365 | 0.262 | 6.26E-21 | T cells | Zc3hav1   |
| 4.57E-25 | -0.2613533 | 0.048 | 0.12  | 6.47E-21 | T cells | Pacsin2   |
| 4.85E-25 | 0.29169674 | 0.124 | 0.056 | 6.86E-21 | T cells | Scml4     |
| 5.23E-25 | 0.28785201 | 0.272 | 0.176 | 7.40E-21 | T cells | Dctn6     |
| 5.48E-25 | 0.39963425 | 0.168 | 0.09  | 7.76E-21 | T cells | Rbl2      |
| 6.97E-25 | 0.33023946 | 0.117 | 0.052 | 9.87E-21 | T cells | Igf2r     |
| 7.36E-25 | -1.0593558 | 0.105 | 0.19  | 1.04E-20 | T cells | Ccrl2     |
| 7.73E-25 | -0.4149005 | 0.199 | 0.296 | 1.09E-20 | T cells | Rtn4      |
| 8.88E-25 | -0.6135995 | 0.273 | 0.361 | 1.26E-20 | T cells | Pnp       |
| 1.20E-24 | -0.4578676 | 0.182 | 0.283 | 1.70E-20 | T cells | Cyth1     |
| 1.23E-24 | -0.5353465 | 0.106 | 0.194 | 1.74E-20 | T cells | Sgk1      |
| 1.26E-24 | 0.3587603  | 0.32  | 0.221 | 1.79E-20 | T cells | Lypla2    |
| 1.41E-24 | 0.32061572 | 0.201 | 0.115 | 1.99E-20 | T cells | Ss18      |
| 1.49E-24 | 0.35318923 | 0.311 | 0.214 | 2.12E-20 | T cells | Pstpip1   |
| 1.60E-24 | 0.30354877 | 0.552 | 0.437 | 2.27E-20 | T cells | Cox7b     |
| 1.85E-24 | 0.31700652 | 0.275 | 0.181 | 2.62E-20 | T cells | Pfdn1     |
| 1.93E-24 | -0.312537  | 0.067 | 0.145 | 2.73E-20 | T cells | Mvp       |
| 1.98E-24 | 0.36205973 | 0.268 | 0.175 | 2.80E-20 | T cells | Polr2c    |
| 2.22E-24 | 0.26689607 | 0.551 | 0.431 | 3.14E-20 | T cells | Srp9      |
| 2.62E-24 | -0.6621769 | 0.295 | 0.381 | 3.71E-20 | T cells | Efh2      |
| 2.71E-24 | -0.3200457 | 0.039 | 0.104 | 3.84E-20 | T cells | Plekhm1   |
| 2.77E-24 | 0.3626277  | 0.32  | 0.22  | 3.92E-20 | T cells | Chic2     |
| 3.08E-24 | 0.27731059 | 0.101 | 0.042 | 4.37E-20 | T cells | Cbx5      |
| 3.28E-24 | -0.4939067 | 0.182 | 0.274 | 4.64E-20 | T cells | Add3      |
| 3.38E-24 | -0.3433234 | 0.228 | 0.346 | 4.78E-20 | T cells | Klf3      |
| 3.95E-24 | -0.4344274 | 0.413 | 0.504 | 5.60E-20 | T cells | Gdi2      |
| 4.22E-24 | -0.3960789 | 0.139 | 0.233 | 5.97E-20 | T cells | Atp6v1b2  |
| 4.90E-24 | -0.5658703 | 0.575 | 0.644 | 6.93E-20 | T cells | Stk17b    |
| 4.94E-24 | -0.3936396 | 0.056 | 0.127 | 6.99E-20 | T cells | Trp53inp2 |
| 6.36E-24 | 0.37820008 | 0.191 | 0.11  | 9.00E-20 | T cells | Ttc39b    |
| 6.97E-24 | 0.29766096 | 0.604 | 0.495 | 9.86E-20 | T cells | Atp5f1    |

|          |            |       |       |          |         |             |
|----------|------------|-------|-------|----------|---------|-------------|
| 7.10E-24 | -0.4578615 | 0.206 | 0.305 | 1.00E-19 | T cells | Rasgrp2     |
| 7.94E-24 | 0.35682568 | 0.175 | 0.097 | 1.12E-19 | T cells | Dnmt1       |
| 8.85E-24 | -0.3375176 | 0.1   | 0.187 | 1.25E-19 | T cells | Map7d1      |
| 9.34E-24 | -0.9697321 | 0.182 | 0.273 | 1.32E-19 | T cells | Lilr4b      |
| 1.38E-23 | 0.33846336 | 0.506 | 0.406 | 1.95E-19 | T cells | Atp5o       |
| 1.62E-23 | -0.4113127 | 0.239 | 0.341 | 2.30E-19 | T cells | Ubl3        |
| 1.83E-23 | 0.32448362 | 0.441 | 0.335 | 2.59E-19 | T cells | Snrpd3      |
| 1.86E-23 | 0.33263153 | 0.353 | 0.254 | 2.63E-19 | T cells | Mien1       |
| 1.86E-23 | -0.4472612 | 0.198 | 0.294 | 2.63E-19 | T cells | Wsb1        |
| 2.04E-23 | 0.35927097 | 0.389 | 0.29  | 2.89E-19 | T cells | Anapc11     |
| 2.05E-23 | 0.41613351 | 0.198 | 0.116 | 2.91E-19 | T cells | Rsb1        |
| 2.13E-23 | -0.5240912 | 0.243 | 0.339 | 3.01E-19 | T cells | Rab7        |
| 2.26E-23 | 0.29099531 | 0.668 | 0.565 | 3.20E-19 | T cells | Eif3k       |
| 2.47E-23 | 0.28548786 | 0.168 | 0.093 | 3.49E-19 | T cells | 4921524J17R |
| 2.77E-23 | -0.4623981 | 0.048 | 0.115 | 3.92E-19 | T cells | Rabgef1     |
| 3.51E-23 | 0.34349013 | 0.437 | 0.331 | 4.97E-19 | T cells | Prdx2       |
| 4.22E-23 | 0.41892206 | 0.264 | 0.174 | 5.97E-19 | T cells | Csnk2a1     |
| 4.55E-23 | 0.29184121 | 0.128 | 0.063 | 6.44E-19 | T cells | Rdm1        |
| 6.47E-23 | -0.4256078 | 0.329 | 0.415 | 9.16E-19 | T cells | Laptm4a     |
| 9.16E-23 | -0.3566637 | 0.043 | 0.107 | 1.30E-18 | T cells | Zfp318      |
| 9.66E-23 | 0.34240287 | 0.413 | 0.312 | 1.37E-18 | T cells | Tmem167     |
| 1.03E-22 | 0.4482428  | 0.419 | 0.33  | 1.46E-18 | T cells | Dek         |
| 1.15E-22 | -1.0229351 | 0.06  | 0.13  | 1.63E-18 | T cells | Cxcl10      |
| 1.16E-22 | -0.3211839 | 0.084 | 0.165 | 1.64E-18 | T cells | Cux1        |
| 1.18E-22 | -0.329217  | 0.091 | 0.172 | 1.68E-18 | T cells | Egln2       |
| 1.35E-22 | 0.35185235 | 0.261 | 0.173 | 1.92E-18 | T cells | Sar1b       |
| 1.39E-22 | -0.3890364 | 0.092 | 0.172 | 1.97E-18 | T cells | Parp1       |
| 1.51E-22 | -0.3991987 | 0.138 | 0.228 | 2.14E-18 | T cells | Mef2a       |
| 1.57E-22 | -0.3830324 | 0.047 | 0.112 | 2.22E-18 | T cells | Ttpal       |
| 1.63E-22 | -0.5026618 | 0.298 | 0.383 | 2.30E-18 | T cells | Ctsa        |
| 1.63E-22 | 0.28529335 | 0.5   | 0.39  | 2.31E-18 | T cells | Tomm20      |
| 1.89E-22 | -0.3656827 | 0.629 | 0.693 | 2.67E-18 | T cells | Ywhaz       |
| 2.05E-22 | 0.25582702 | 0.123 | 0.059 | 2.91E-18 | T cells | Ormdl3      |
| 2.40E-22 | 0.37085222 | 0.199 | 0.118 | 3.40E-18 | T cells | Isg20       |
| 2.51E-22 | 0.31748674 | 0.135 | 0.069 | 3.56E-18 | T cells | Bzw2        |
| 2.91E-22 | 0.38621728 | 0.239 | 0.155 | 4.11E-18 | T cells | Def6        |
| 2.94E-22 | 0.31596326 | 0.171 | 0.097 | 4.17E-18 | T cells | Vcpkmt      |
| 3.15E-22 | -0.3535509 | 0.139 | 0.23  | 4.46E-18 | T cells | Kdm7a       |
| 3.57E-22 | -0.3531329 | 0.065 | 0.136 | 5.06E-18 | T cells | Tnrc18      |
| 4.53E-22 | 0.41070867 | 0.166 | 0.095 | 6.41E-18 | T cells | Nlrc5       |
| 4.62E-22 | 0.32937122 | 0.203 | 0.121 | 6.53E-18 | T cells | Prrc2b      |
| 4.89E-22 | -0.4234635 | 0.175 | 0.264 | 6.93E-18 | T cells | Spop        |
| 4.91E-22 | 0.28338761 | 0.675 | 0.6   | 6.96E-18 | T cells | Ubl5        |
| 4.96E-22 | -0.3844692 | 0.168 | 0.262 | 7.02E-18 | T cells | Rasa3       |
| 5.02E-22 | -0.4201845 | 0.074 | 0.147 | 7.10E-18 | T cells | Eif2ak3     |
| 5.05E-22 | 0.25548846 | 0.106 | 0.047 | 7.14E-18 | T cells | Gm20186     |
| 5.58E-22 | 0.36823285 | 0.389 | 0.293 | 7.90E-18 | T cells | Ranbp1      |
| 6.32E-22 | -0.3181797 | 0.061 | 0.132 | 8.95E-18 | T cells | Tgfbr1      |



|          |            |       |       |          |         |          |
|----------|------------|-------|-------|----------|---------|----------|
| 7.28E-22 | 0.3054371  | 0.477 | 0.37  | 1.03E-17 | T cells | Lsm4     |
| 8.40E-22 | 0.45306189 | 0.338 | 0.246 | 1.19E-17 | T cells | Dock10   |
| 8.41E-22 | 0.25191239 | 0.143 | 0.074 | 1.19E-17 | T cells | Ppil1    |
| 9.30E-22 | 0.35851404 | 0.176 | 0.101 | 1.32E-17 | T cells | Nsmaf    |
| 9.60E-22 | 0.30900361 | 0.268 | 0.178 | 1.36E-17 | T cells | Ccng1    |
| 1.12E-21 | -0.2961213 | 0.041 | 0.103 | 1.59E-17 | T cells | Hk2      |
| 1.31E-21 | -0.2559048 | 0.047 | 0.112 | 1.85E-17 | T cells | Arf2     |
| 1.36E-21 | 0.31802956 | 0.227 | 0.146 | 1.93E-17 | T cells | Ssbp4    |
| 1.67E-21 | 0.31241567 | 0.138 | 0.072 | 2.36E-17 | T cells | Galnt2   |
| 1.68E-21 | 0.30519879 | 0.552 | 0.45  | 2.38E-17 | T cells | Ndufa2   |
| 1.84E-21 | 0.29409344 | 0.198 | 0.12  | 2.60E-17 | T cells | Itgb1bp1 |
| 2.04E-21 | 0.39679354 | 0.335 | 0.238 | 2.88E-17 | T cells | Cdkn1b   |
| 2.14E-21 | 0.27946798 | 0.567 | 0.468 | 3.02E-17 | T cells | Psma3    |
| 2.74E-21 | 0.27531086 | 0.204 | 0.125 | 3.88E-17 | T cells | Pdrg1    |
| 2.78E-21 | 0.29848303 | 0.366 | 0.268 | 3.94E-17 | T cells | Ndufv2   |
| 3.04E-21 | -0.3666186 | 0.13  | 0.215 | 4.31E-17 | T cells | Ist1     |
| 3.34E-21 | -0.2966952 | 0.069 | 0.14  | 4.73E-17 | T cells | Colgalt1 |
| 3.41E-21 | -0.6142579 | 0.195 | 0.282 | 4.83E-17 | T cells | Irf7     |
| 3.57E-21 | -0.3141574 | 0.116 | 0.199 | 5.05E-17 | T cells | Hmga1    |
| 3.93E-21 | 0.27712412 | 0.154 | 0.084 | 5.57E-17 | T cells | Esyt2    |
| 4.35E-21 | -0.2923161 | 0.088 | 0.165 | 6.16E-17 | T cells | Abhd12   |
| 4.48E-21 | -0.3245019 | 0.098 | 0.176 | 6.35E-17 | T cells | Mfsd1    |
| 4.97E-21 | 0.2541913  | 0.152 | 0.082 | 7.03E-17 | T cells | Tmem71   |
| 5.16E-21 | -0.4947306 | 0.479 | 0.539 | 7.30E-17 | T cells | Rhog     |
| 5.23E-21 | 0.29825449 | 0.238 | 0.147 | 7.40E-17 | T cells | Acap1    |
| 5.24E-21 | -0.2975314 | 0.074 | 0.146 | 7.41E-17 | T cells | Vps26a   |
| 5.67E-21 | -0.3986111 | 0.298 | 0.394 | 8.02E-17 | T cells | Hcls1    |
| 6.44E-21 | -0.3749902 | 0.047 | 0.109 | 9.12E-17 | T cells | Arrdc3   |
| 6.74E-21 | 0.2894537  | 0.421 | 0.321 | 9.54E-17 | T cells | Snrpd2   |
| 7.65E-21 | -0.4633256 | 0.067 | 0.134 | 1.08E-16 | T cells | Irf4     |
| 7.69E-21 | 0.26488915 | 0.147 | 0.079 | 1.09E-16 | T cells | Sfxn1    |
| 7.77E-21 | -0.3189828 | 0.055 | 0.121 | 1.10E-16 | T cells | Flcn     |
| 9.06E-21 | 0.28452892 | 0.417 | 0.318 | 1.28E-16 | T cells | Dctn3    |
| 9.28E-21 | 0.36184351 | 0.122 | 0.062 | 1.31E-16 | T cells | Oxsr1    |
| 9.48E-21 | -0.2513625 | 0.054 | 0.12  | 1.34E-16 | T cells | Mgat1    |
| 9.91E-21 | -0.4507689 | 0.272 | 0.36  | 1.40E-16 | T cells | Syng2    |
| 1.03E-20 | -0.4905478 | 0.202 | 0.293 | 1.46E-16 | T cells | Mbnl2    |
| 1.06E-20 | -0.3251075 | 0.065 | 0.134 | 1.50E-16 | T cells | Med7     |
| 1.27E-20 | 0.35017506 | 0.113 | 0.054 | 1.80E-16 | T cells | Dusp4    |
| 1.28E-20 | -0.4099019 | 0.146 | 0.229 | 1.82E-16 | T cells | Abhd17b  |
| 1.29E-20 | 0.32036474 | 0.339 | 0.239 | 1.83E-16 | T cells | Isy1     |
| 1.39E-20 | 0.29984465 | 0.573 | 0.466 | 1.97E-16 | T cells | Jak1     |
| 1.58E-20 | 0.29400028 | 0.139 | 0.073 | 2.24E-16 | T cells | Zbtb1    |
| 1.65E-20 | 0.33072672 | 0.397 | 0.3   | 2.33E-16 | T cells | Cuta     |
| 1.71E-20 | 0.32443529 | 0.361 | 0.268 | 2.42E-16 | T cells | Smap1    |
| 1.73E-20 | -0.426327  | 0.365 | 0.454 | 2.45E-16 | T cells | Ccnl1    |
| 1.75E-20 | 0.37649424 | 0.309 | 0.224 | 2.48E-16 | T cells | Etfb     |
| 1.78E-20 | -0.4212074 | 0.232 | 0.32  | 2.52E-16 | T cells | Tmbim4   |

|          |            |       |       |          |         |         |
|----------|------------|-------|-------|----------|---------|---------|
| 1.99E-20 | 0.30924768 | 0.363 | 0.267 | 2.81E-16 | T cells | Ssr2    |
| 2.05E-20 | -0.307089  | 0.632 | 0.683 | 2.90E-16 | T cells | Rpl10   |
| 2.05E-20 | -0.5256463 | 0.047 | 0.108 | 2.90E-16 | T cells | Iigp1   |
| 2.08E-20 | 0.28313215 | 0.219 | 0.139 | 2.94E-16 | T cells | Mdp1    |
| 2.12E-20 | 0.27948573 | 0.623 | 0.528 | 3.01E-16 | T cells | Hint1   |
| 2.33E-20 | -0.2577097 | 0.045 | 0.107 | 3.30E-16 | T cells | Cln3    |
| 2.39E-20 | -0.5427702 | 0.418 | 0.494 | 3.38E-16 | T cells | Dusp2   |
| 2.47E-20 | -0.2545224 | 0.05  | 0.113 | 3.50E-16 | T cells | Epb41l2 |
| 2.67E-20 | 0.36950968 | 0.337 | 0.246 | 3.79E-16 | T cells | Sh3kbp1 |
| 3.13E-20 | 0.32290298 | 0.261 | 0.178 | 4.44E-16 | T cells | Nutf2   |
| 3.33E-20 | -0.3468225 | 0.103 | 0.181 | 4.71E-16 | T cells | Abi3    |
| 3.37E-20 | 0.3745611  | 0.528 | 0.427 | 4.77E-16 | T cells | Sec62   |
| 3.42E-20 | 0.28772914 | 0.233 | 0.151 | 4.85E-16 | T cells | Mrps26  |
| 3.51E-20 | -0.4640694 | 0.111 | 0.186 | 4.96E-16 | T cells | Cndp2   |
| 3.53E-20 | 0.30613743 | 0.15  | 0.084 | 5.00E-16 | T cells | Kcnn4   |
| 3.60E-20 | -0.3463819 | 0.13  | 0.213 | 5.10E-16 | T cells | Nckap1l |
| 3.67E-20 | 0.30408339 | 0.169 | 0.098 | 5.19E-16 | T cells | Mmd     |
| 3.70E-20 | 0.30300585 | 0.334 | 0.242 | 5.24E-16 | T cells | Vps29   |
| 3.95E-20 | -0.4163542 | 0.223 | 0.309 | 5.59E-16 | T cells | Pitpna  |
| 3.97E-20 | -0.4988973 | 0.307 | 0.391 | 5.62E-16 | T cells | Mpc1    |
| 4.80E-20 | 0.33214668 | 0.29  | 0.204 | 6.79E-16 | T cells | Ssna1   |
| 4.85E-20 | -0.2794881 | 0.481 | 0.571 | 6.86E-16 | T cells | Iqgap1  |
| 5.04E-20 | 0.25950932 | 0.222 | 0.143 | 7.13E-16 | T cells | Zbtb8os |
| 5.52E-20 | 0.35166475 | 0.358 | 0.261 | 7.82E-16 | T cells | Pycard  |
| 6.66E-20 | 0.38261652 | 0.202 | 0.126 | 9.43E-16 | T cells | Mlec    |
| 6.73E-20 | 0.27344761 | 0.496 | 0.392 | 9.52E-16 | T cells | Bsg     |
| 7.49E-20 | -0.2650325 | 0.073 | 0.143 | 1.06E-15 | T cells | Plekhf2 |
| 7.71E-20 | -0.3305332 | 0.118 | 0.196 | 1.09E-15 | T cells | Lmbrd1  |
| 7.98E-20 | 0.42482077 | 0.3   | 0.211 | 1.13E-15 | T cells | Nfatc1  |
| 8.42E-20 | 0.30643323 | 0.269 | 0.185 | 1.19E-15 | T cells | Denr    |
| 8.68E-20 | 0.28089036 | 0.377 | 0.282 | 1.23E-15 | T cells | Bola2   |
| 1.01E-19 | -0.3568302 | 0.079 | 0.149 | 1.43E-15 | T cells | Mylip   |
| 1.03E-19 | -0.4692464 | 0.868 | 0.835 | 1.46E-15 | T cells | mt-Nd4l |
| 1.06E-19 | 0.31293953 | 0.237 | 0.156 | 1.50E-15 | T cells | Fam162a |
| 1.10E-19 | -0.5431461 | 0.167 | 0.251 | 1.55E-15 | T cells | Sorl1   |
| 1.10E-19 | 0.28982076 | 0.252 | 0.166 | 1.56E-15 | T cells | Cbx3    |
| 1.22E-19 | -0.8197997 | 0.113 | 0.185 | 1.73E-15 | T cells | Gbp2    |
| 1.33E-19 | -0.6874596 | 0.629 | 0.644 | 1.88E-15 | T cells | Vim     |
| 1.56E-19 | -0.3907479 | 0.053 | 0.114 | 2.21E-15 | T cells | St6gal1 |
| 1.88E-19 | -0.376588  | 0.101 | 0.175 | 2.67E-15 | T cells | Sgms1   |
| 1.95E-19 | 0.29585676 | 0.24  | 0.16  | 2.76E-15 | T cells | Ddt     |
| 2.23E-19 | 0.2790784  | 0.264 | 0.181 | 3.15E-15 | T cells | Pigx    |
| 2.24E-19 | 0.30794113 | 0.424 | 0.328 | 3.16E-15 | T cells | U2af1   |
| 2.52E-19 | -0.3096911 | 0.051 | 0.113 | 3.57E-15 | T cells | Tbc1d14 |
| 3.01E-19 | 0.28314342 | 0.423 | 0.331 | 4.26E-15 | T cells | Calm3   |
| 3.03E-19 | 0.28839638 | 0.196 | 0.121 | 4.29E-15 | T cells | Usp1    |
| 3.04E-19 | 0.39668056 | 0.233 | 0.157 | 4.30E-15 | T cells | Bscl2   |
| 3.04E-19 | 0.27723659 | 0.394 | 0.298 | 4.30E-15 | T cells | Dynlrb1 |

|          |            |       |       |          |         |          |
|----------|------------|-------|-------|----------|---------|----------|
| 3.05E-19 | 0.25295357 | 0.136 | 0.073 | 4.31E-15 | T cells | Mcm4     |
| 3.20E-19 | 0.2860649  | 0.15  | 0.085 | 4.53E-15 | T cells | Psmg2    |
| 3.24E-19 | 0.31032662 | 0.324 | 0.235 | 4.59E-15 | T cells | Emc10    |
| 3.26E-19 | 0.28160081 | 0.416 | 0.314 | 4.62E-15 | T cells | Crem     |
| 3.30E-19 | 0.32648046 | 0.312 | 0.227 | 4.67E-15 | T cells | Rexo2    |
| 3.30E-19 | -0.3052623 | 0.198 | 0.293 | 4.68E-15 | T cells | Neur13   |
| 3.85E-19 | 0.27841058 | 0.204 | 0.13  | 5.45E-15 | T cells | Surf1    |
| 3.91E-19 | 0.25937352 | 0.522 | 0.42  | 5.54E-15 | T cells | Tomm22   |
| 3.93E-19 | 0.25070202 | 0.216 | 0.139 | 5.57E-15 | T cells | Dcps     |
| 4.00E-19 | -0.4083714 | 0.128 | 0.207 | 5.66E-15 | T cells | Elmsan1  |
| 4.12E-19 | -0.4134215 | 0.733 | 0.744 | 5.84E-15 | T cells | Ier2     |
| 4.36E-19 | 0.3406618  | 0.272 | 0.19  | 6.18E-15 | T cells | Ift20    |
| 4.72E-19 | 0.26260262 | 0.838 | 0.773 | 6.68E-15 | T cells | Sub1     |
| 4.74E-19 | 0.30809212 | 0.306 | 0.214 | 6.70E-15 | T cells | Cd164    |
| 5.44E-19 | 0.37797102 | 0.424 | 0.333 | 7.70E-15 | T cells | Eif3c    |
| 6.02E-19 | 0.32265441 | 0.227 | 0.151 | 8.52E-15 | T cells | Borcs8   |
| 6.12E-19 | -0.3533816 | 0.224 | 0.311 | 8.66E-15 | T cells | Grb2     |
| 6.17E-19 | 0.32957171 | 0.282 | 0.194 | 8.73E-15 | T cells | Slc1a5   |
| 6.43E-19 | 0.32189716 | 0.16  | 0.092 | 9.11E-15 | T cells | Vps13a   |
| 6.51E-19 | -0.3635137 | 0.223 | 0.313 | 9.21E-15 | T cells | Bcl10    |
| 6.99E-19 | 0.33525987 | 0.261 | 0.181 | 9.90E-15 | T cells | Dap      |
| 7.03E-19 | 0.25861909 | 0.224 | 0.147 | 9.95E-15 | T cells | Cmc1     |
| 7.05E-19 | 0.31513684 | 0.476 | 0.38  | 9.98E-15 | T cells | Pak2     |
| 7.17E-19 | -0.2744572 | 0.095 | 0.17  | 1.02E-14 | T cells | Dapp1    |
| 7.41E-19 | 0.26694081 | 0.305 | 0.219 | 1.05E-14 | T cells | Ndufs6   |
| 9.50E-19 | 0.30800477 | 0.34  | 0.253 | 1.34E-14 | T cells | Cops6    |
| 1.02E-18 | 0.33131048 | 0.622 | 0.522 | 1.45E-14 | T cells | Srrm2    |
| 1.08E-18 | 0.27530237 | 0.381 | 0.288 | 1.53E-14 | T cells | Ndufb6   |
| 1.11E-18 | -0.3952476 | 0.38  | 0.464 | 1.57E-14 | T cells | Arf6     |
| 1.14E-18 | 0.2892696  | 0.269 | 0.186 | 1.62E-14 | T cells | Thoc7    |
| 1.24E-18 | -0.3048626 | 0.144 | 0.228 | 1.76E-14 | T cells | Pkn1     |
| 1.25E-18 | -0.3940549 | 0.119 | 0.194 | 1.77E-14 | T cells | Pnpla2   |
| 1.56E-18 | 0.38786531 | 0.335 | 0.247 | 2.20E-14 | T cells | Ppp1r12a |
| 1.62E-18 | 0.30248759 | 0.217 | 0.139 | 2.29E-14 | T cells | Pnn      |
| 1.98E-18 | -0.2594429 | 0.074 | 0.141 | 2.81E-14 | T cells | Pdlim5   |
| 2.00E-18 | -0.2659689 | 0.073 | 0.14  | 2.83E-14 | T cells | Camk1d   |
| 2.02E-18 | -0.3206629 | 0.208 | 0.3   | 2.86E-14 | T cells | Ssh2     |
| 2.02E-18 | -0.3065208 | 0.693 | 0.728 | 2.86E-14 | T cells | Cdc42    |
| 2.09E-18 | 0.29581913 | 0.286 | 0.202 | 2.96E-14 | T cells | Imp3     |
| 2.21E-18 | -0.2977407 | 0.07  | 0.134 | 3.13E-14 | T cells | Rere     |
| 2.53E-18 | -0.324169  | 0.138 | 0.217 | 3.58E-14 | T cells | Vav1     |
| 2.64E-18 | 0.29318482 | 0.765 | 0.673 | 3.74E-14 | T cells | H2afz    |
| 2.74E-18 | -0.286156  | 0.056 | 0.118 | 3.88E-14 | T cells | Slc12a6  |
| 2.80E-18 | 0.320166   | 0.259 | 0.175 | 3.96E-14 | T cells | Rad21    |
| 2.84E-18 | 0.25135328 | 0.355 | 0.261 | 4.02E-14 | T cells | Bcas2    |
| 2.85E-18 | 0.28257365 | 0.108 | 0.055 | 4.04E-14 | T cells | Cib2     |
| 3.12E-18 | 0.29087817 | 0.436 | 0.341 | 4.42E-14 | T cells | Cwc15    |
| 3.51E-18 | 0.36567523 | 0.211 | 0.136 | 4.96E-14 | T cells | Fryl     |

|          |            |       |       |          |         |            |
|----------|------------|-------|-------|----------|---------|------------|
| 3.57E-18 | -0.2878098 | 0.116 | 0.191 | 5.06E-14 | T cells | Gusb       |
| 3.90E-18 | -0.444171  | 0.269 | 0.348 | 5.52E-14 | T cells | Tkt        |
| 4.15E-18 | -0.2972774 | 0.057 | 0.116 | 5.87E-14 | T cells | A630001G21 |
| 4.19E-18 | 0.28291283 | 0.403 | 0.31  | 5.93E-14 | T cells | Ociad1     |
| 4.47E-18 | 0.40814844 | 0.435 | 0.343 | 6.33E-14 | T cells | Prrc2c     |
| 5.18E-18 | 0.25332876 | 0.248 | 0.167 | 7.34E-14 | T cells | Rdx        |
| 5.42E-18 | -0.4612236 | 0.195 | 0.277 | 7.67E-14 | T cells | Tcp11l2    |
| 5.46E-18 | -0.3435615 | 0.179 | 0.261 | 7.73E-14 | T cells | Nrbp1      |
| 5.50E-18 | 0.25523715 | 0.14  | 0.078 | 7.78E-14 | T cells | Rangap1    |
| 5.69E-18 | 0.2524312  | 0.58  | 0.486 | 8.05E-14 | T cells | Snrpb      |
| 5.91E-18 | -0.3666406 | 0.049 | 0.106 | 8.37E-14 | T cells | Grasp      |
| 6.13E-18 | 0.28241996 | 0.164 | 0.096 | 8.68E-14 | T cells | Nup210     |
| 6.48E-18 | 0.30117713 | 0.308 | 0.225 | 9.17E-14 | T cells | Pa2g4      |
| 6.56E-18 | 0.26101299 | 0.281 | 0.197 | 9.29E-14 | T cells | Med10      |
| 6.78E-18 | 0.30091878 | 0.379 | 0.29  | 9.60E-14 | T cells | Psmd4      |
| 6.82E-18 | -0.3261221 | 0.14  | 0.219 | 9.66E-14 | T cells | Sh3bgrl    |
| 7.12E-18 | 0.28854982 | 0.411 | 0.321 | 1.01E-13 | T cells | Psmb4      |
| 7.22E-18 | 0.27865363 | 0.125 | 0.068 | 1.02E-13 | T cells | Mitd1      |
| 7.79E-18 | -0.2580682 | 0.058 | 0.119 | 1.10E-13 | T cells | Cers6      |
| 7.96E-18 | 0.28410078 | 0.281 | 0.199 | 1.13E-13 | T cells | Scamp3     |
| 8.67E-18 | 0.27577701 | 0.447 | 0.352 | 1.23E-13 | T cells | Ndufa11    |
| 8.94E-18 | 0.25706006 | 0.468 | 0.372 | 1.27E-13 | T cells | Raly       |
| 9.85E-18 | -0.4056045 | 0.149 | 0.225 | 1.39E-13 | T cells | Dynlt1b    |
| 1.19E-17 | 0.29854783 | 0.325 | 0.24  | 1.68E-13 | T cells | Mea1       |
| 1.19E-17 | -0.274778  | 0.087 | 0.155 | 1.68E-13 | T cells | Hmgcl      |
| 1.27E-17 | -0.2818406 | 0.092 | 0.161 | 1.80E-13 | T cells | Relb       |
| 1.40E-17 | 0.26187191 | 0.218 | 0.143 | 1.98E-13 | T cells | Nucks1     |
| 1.42E-17 | 0.33198442 | 0.153 | 0.091 | 2.01E-13 | T cells | Hk1        |
| 1.79E-17 | 0.29163754 | 0.281 | 0.2   | 2.53E-13 | T cells | Abcf1      |
| 1.80E-17 | -0.3208962 | 0.079 | 0.143 | 2.55E-13 | T cells | Txndc5     |
| 1.86E-17 | -0.3002166 | 0.052 | 0.111 | 2.63E-13 | T cells | Furin      |
| 2.00E-17 | 0.29681524 | 0.145 | 0.083 | 2.83E-13 | T cells | Msi2       |
| 2.10E-17 | -0.2742233 | 0.066 | 0.128 | 2.97E-13 | T cells | Mapk3      |
| 2.39E-17 | 0.3024542  | 0.33  | 0.245 | 3.39E-13 | T cells | Srp19      |
| 2.57E-17 | -0.3123426 | 0.123 | 0.2   | 3.65E-13 | T cells | Spag9      |
| 3.82E-17 | 0.25577825 | 0.237 | 0.161 | 5.40E-13 | T cells | Pcnp       |
| 3.83E-17 | 0.27658032 | 0.324 | 0.241 | 5.43E-13 | T cells | Eif4e2     |
| 3.90E-17 | 0.33752723 | 0.12  | 0.065 | 5.52E-13 | T cells | Abcb1b     |
| 4.08E-17 | 0.25741506 | 0.458 | 0.362 | 5.78E-13 | T cells | Cope       |
| 4.44E-17 | -0.3692793 | 0.137 | 0.211 | 6.28E-13 | T cells | Taf6l      |
| 4.47E-17 | -0.2874443 | 0.143 | 0.222 | 6.33E-13 | T cells | Jmjd1c     |
| 4.57E-17 | 0.53307893 | 0.289 | 0.213 | 6.46E-13 | T cells | H2afx      |
| 4.83E-17 | -0.38585   | 0.079 | 0.143 | 6.84E-13 | T cells | Irgm1      |
| 5.28E-17 | -0.3207245 | 0.139 | 0.216 | 7.48E-13 | T cells | Zfp106     |
| 6.06E-17 | 0.32103785 | 0.266 | 0.186 | 8.58E-13 | T cells | Hp1bp3     |
| 6.17E-17 | 0.29879141 | 0.131 | 0.074 | 8.73E-13 | T cells | Znrf1      |
| 6.85E-17 | 0.29188359 | 0.295 | 0.214 | 9.70E-13 | T cells | Prmt1      |
| 7.99E-17 | 0.31336818 | 0.259 | 0.181 | 1.13E-12 | T cells | Smc1a      |

|          |            |       |       |          |         |             |
|----------|------------|-------|-------|----------|---------|-------------|
| 8.47E-17 | -0.2672189 | 0.058 | 0.115 | 1.20E-12 | T cells | Anxa4       |
| 8.68E-17 | 0.32532695 | 0.116 | 0.062 | 1.23E-12 | T cells | Kif13b      |
| 9.16E-17 | 0.26386873 | 0.39  | 0.304 | 1.30E-12 | T cells | Snrpd1      |
| 1.03E-16 | 0.3854239  | 0.187 | 0.121 | 1.46E-12 | T cells | Ramp1       |
| 1.05E-16 | 0.25341392 | 0.128 | 0.072 | 1.49E-12 | T cells | Desi1       |
| 1.13E-16 | -0.2784302 | 0.068 | 0.129 | 1.59E-12 | T cells | Gbp3        |
| 1.19E-16 | 0.26657469 | 0.246 | 0.17  | 1.69E-12 | T cells | Mrpl15      |
| 1.20E-16 | 0.28543788 | 0.37  | 0.282 | 1.70E-12 | T cells | Plekhj1     |
| 1.39E-16 | -0.3861379 | 0.498 | 0.56  | 1.96E-12 | T cells | Sqstm1      |
| 1.51E-16 | 0.27238099 | 0.183 | 0.117 | 2.13E-12 | T cells | Glo1        |
| 1.60E-16 | 0.38720847 | 0.682 | 0.582 | 2.26E-12 | T cells | Ifi2712a    |
| 1.60E-16 | -0.4294576 | 0.248 | 0.325 | 2.27E-12 | T cells | Pold4       |
| 1.84E-16 | 0.28661212 | 0.166 | 0.103 | 2.60E-12 | T cells | Dynll2      |
| 1.88E-16 | -0.3060953 | 0.123 | 0.197 | 2.66E-12 | T cells | Ypel5       |
| 1.92E-16 | -0.5341094 | 0.244 | 0.321 | 2.72E-12 | T cells | Card19      |
| 2.65E-16 | -0.2852378 | 0.06  | 0.116 | 3.75E-12 | T cells | Lpgat1      |
| 2.68E-16 | -0.3337417 | 0.1   | 0.167 | 3.79E-12 | T cells | Klhl24      |
| 2.71E-16 | -0.3213297 | 0.098 | 0.165 | 3.84E-12 | T cells | Casp1       |
| 2.82E-16 | 0.30981811 | 0.475 | 0.394 | 3.99E-12 | T cells | Ube2s       |
| 3.29E-16 | 0.30637578 | 0.302 | 0.223 | 4.66E-12 | T cells | Tpst2       |
| 3.36E-16 | -0.5834389 | 0.486 | 0.498 | 4.75E-12 | T cells | Atox1       |
| 3.58E-16 | -0.2560681 | 0.05  | 0.104 | 5.07E-12 | T cells | Gsap        |
| 3.82E-16 | 0.28176373 | 0.287 | 0.211 | 5.40E-12 | T cells | Eif1ax      |
| 3.84E-16 | 0.25277932 | 0.173 | 0.108 | 5.44E-12 | T cells | 2310033P09F |
| 3.84E-16 | -0.3484851 | 0.245 | 0.161 | 5.44E-12 | T cells | Gzma        |
| 3.86E-16 | 0.31500192 | 0.295 | 0.219 | 5.47E-12 | T cells | Rnaseh2c    |
| 4.67E-16 | -0.3890024 | 0.136 | 0.205 | 6.61E-12 | T cells | Stt3b       |
| 4.71E-16 | 0.33668926 | 0.165 | 0.102 | 6.66E-12 | T cells | Lonp2       |
| 6.17E-16 | 0.34046941 | 0.352 | 0.269 | 8.73E-12 | T cells | Birc6       |
| 7.22E-16 | 0.29784046 | 0.223 | 0.153 | 1.02E-11 | T cells | Dctn4       |
| 7.23E-16 | 0.3520181  | 0.365 | 0.28  | 1.02E-11 | T cells | Smarca5     |
| 7.63E-16 | -0.3935959 | 0.051 | 0.102 | 1.08E-11 | T cells | Cpm         |
| 7.97E-16 | 0.26624237 | 0.142 | 0.085 | 1.13E-11 | T cells | Thap3       |
| 8.20E-16 | 0.26102593 | 0.965 | 0.904 | 1.16E-11 | T cells | Tmsb10      |
| 8.39E-16 | 0.33012373 | 0.414 | 0.335 | 1.19E-11 | T cells | Ppp1cc      |
| 8.85E-16 | 0.25253907 | 0.369 | 0.284 | 1.25E-11 | T cells | Psm4        |
| 9.68E-16 | -0.2781581 | 0.1   | 0.165 | 1.37E-11 | T cells | Atp6v1a     |
| 1.06E-15 | 0.32977214 | 0.374 | 0.29  | 1.51E-11 | T cells | Pole4       |
| 1.07E-15 | -0.2804932 | 0.058 | 0.114 | 1.51E-11 | T cells | Dclre1c     |
| 1.07E-15 | 0.3088787  | 0.175 | 0.109 | 1.52E-11 | T cells | Arap2       |
| 1.27E-15 | -0.3089218 | 0.164 | 0.238 | 1.80E-11 | T cells | Hnrnph2     |
| 1.36E-15 | -0.2520257 | 0.061 | 0.117 | 1.93E-11 | T cells | Tmem50b     |
| 1.39E-15 | 0.25421292 | 0.123 | 0.069 | 1.97E-11 | T cells | Med14       |
| 1.46E-15 | 0.26931455 | 0.285 | 0.21  | 2.06E-11 | T cells | Pdap1       |
| 1.51E-15 | 0.31906277 | 0.39  | 0.304 | 2.14E-11 | T cells | Ncor1       |
| 1.53E-15 | -0.6058246 | 0.338 | 0.399 | 2.16E-11 | T cells | Zyx         |
| 1.53E-15 | 0.27370027 | 0.384 | 0.301 | 2.16E-11 | T cells | Wdr83os     |
| 1.58E-15 | 0.36434324 | 0.497 | 0.412 | 2.24E-11 | T cells | H2-Q4       |

|          |            |       |       |          |         |          |
|----------|------------|-------|-------|----------|---------|----------|
| 1.70E-15 | -0.3237892 | 0.109 | 0.175 | 2.40E-11 | T cells | Oat      |
| 1.96E-15 | -0.345775  | 0.142 | 0.211 | 2.78E-11 | T cells | Dgkd     |
| 2.10E-15 | 0.298788   | 0.162 | 0.1   | 2.97E-11 | T cells | 11-Sep   |
| 2.15E-15 | 0.33192225 | 0.563 | 0.477 | 3.05E-11 | T cells | Akap13   |
| 3.62E-15 | 0.27365461 | 0.304 | 0.228 | 5.13E-11 | T cells | Psmc5    |
| 3.63E-15 | 0.26322219 | 0.365 | 0.279 | 5.13E-11 | T cells | Dnajc3   |
| 3.68E-15 | -0.3284725 | 0.116 | 0.184 | 5.21E-11 | T cells | Metrn1   |
| 4.79E-15 | 0.26526651 | 0.267 | 0.191 | 6.78E-11 | T cells | Fubp1    |
| 5.20E-15 | -0.2626715 | 0.06  | 0.114 | 7.36E-11 | T cells | Rnf216   |
| 5.32E-15 | -0.3039632 | 0.113 | 0.178 | 7.53E-11 | T cells | Stat6    |
| 5.47E-15 | 0.27650086 | 0.213 | 0.145 | 7.74E-11 | T cells | Rsl1d1   |
| 6.58E-15 | 0.36485158 | 0.278 | 0.204 | 9.32E-11 | T cells | Atp11b   |
| 7.57E-15 | 0.27654815 | 0.114 | 0.064 | 1.07E-10 | T cells | Pja1     |
| 8.35E-15 | 0.27269981 | 0.139 | 0.084 | 1.18E-10 | T cells | Elk3     |
| 9.64E-15 | 0.31550283 | 0.223 | 0.155 | 1.37E-10 | T cells | Chfr     |
| 9.80E-15 | 0.25764727 | 0.292 | 0.217 | 1.39E-10 | T cells | Ccdc59   |
| 1.00E-14 | -0.2505969 | 0.092 | 0.155 | 1.42E-10 | T cells | Cyb5r3   |
| 1.03E-14 | 0.42551565 | 0.152 | 0.094 | 1.45E-10 | T cells | Hist1h1e |
| 1.03E-14 | 0.32807006 | 0.188 | 0.127 | 1.46E-10 | T cells | Arl4c    |
| 1.10E-14 | -0.3479206 | 0.42  | 0.48  | 1.56E-10 | T cells | Sh3glb1  |
| 1.25E-14 | -0.2670729 | 0.073 | 0.13  | 1.77E-10 | T cells | Fam49a   |
| 1.49E-14 | -0.3340609 | 0.175 | 0.248 | 2.11E-10 | T cells | Tonsl    |
| 1.74E-14 | 0.33799053 | 0.327 | 0.249 | 2.46E-10 | T cells | Srpr     |
| 1.76E-14 | 0.27603752 | 0.25  | 0.181 | 2.50E-10 | T cells | Actr10   |
| 1.99E-14 | 0.2764017  | 0.232 | 0.165 | 2.82E-10 | T cells | Emc4     |
| 2.29E-14 | -0.2655595 | 0.088 | 0.148 | 3.24E-10 | T cells | Fam111a  |
| 2.33E-14 | -0.3037411 | 0.133 | 0.197 | 3.30E-10 | T cells | Vars     |
| 2.54E-14 | 0.25528873 | 0.301 | 0.227 | 3.59E-10 | T cells | Ccdc124  |
| 2.57E-14 | -0.4600204 | 0.085 | 0.138 | 3.64E-10 | T cells | Trp53i11 |
| 2.72E-14 | 0.32064559 | 0.333 | 0.258 | 3.86E-10 | T cells | Metap2   |
| 3.84E-14 | -0.3368237 | 0.237 | 0.311 | 5.44E-10 | T cells | Ddx3x    |
| 4.02E-14 | 0.25841025 | 0.366 | 0.289 | 5.69E-10 | T cells | Bag1     |
| 4.05E-14 | -0.3393338 | 0.135 | 0.201 | 5.74E-10 | T cells | Il17ra   |
| 4.12E-14 | -0.2705373 | 0.072 | 0.126 | 5.83E-10 | T cells | Brwd1    |
| 4.49E-14 | 0.27988285 | 0.326 | 0.251 | 6.35E-10 | T cells | Ufc1     |
| 4.51E-14 | -0.5468596 | 0.214 | 0.279 | 6.38E-10 | T cells | Glul     |
| 5.51E-14 | -0.2961219 | 0.118 | 0.181 | 7.80E-10 | T cells | Ddit3    |
| 5.66E-14 | 0.25050414 | 0.448 | 0.365 | 8.01E-10 | T cells | Bzw1     |
| 6.03E-14 | 0.25954875 | 0.128 | 0.078 | 8.54E-10 | T cells | Lxn      |
| 6.10E-14 | -0.3100863 | 0.692 | 0.626 | 8.64E-10 | T cells | S100a11  |
| 8.16E-14 | 0.32769007 | 0.304 | 0.232 | 1.15E-09 | T cells | Anp32e   |
| 8.57E-14 | 0.26223736 | 0.142 | 0.089 | 1.21E-09 | T cells | Frmd8    |
| 8.66E-14 | 0.27977215 | 0.146 | 0.091 | 1.23E-09 | T cells | Cdkn2aip |
| 8.71E-14 | 0.29867185 | 0.42  | 0.348 | 1.23E-09 | T cells | Banf1    |
| 9.73E-14 | 0.42418861 | 0.462 | 0.379 | 1.38E-09 | T cells | Ahnak    |
| 1.04E-13 | -0.3330948 | 0.095 | 0.154 | 1.47E-09 | T cells | Cd274    |
| 1.10E-13 | 0.25963791 | 0.116 | 0.067 | 1.55E-09 | T cells | Rif1     |
| 1.11E-13 | -0.2950769 | 0.12  | 0.182 | 1.57E-09 | T cells | Dynlt1c  |

|          |            |       |       |          |         |           |
|----------|------------|-------|-------|----------|---------|-----------|
| 1.18E-13 | 0.35452832 | 0.178 | 0.119 | 1.68E-09 | T cells | Kdm2b     |
| 1.30E-13 | 0.27260523 | 0.16  | 0.102 | 1.84E-09 | T cells | Madd      |
| 1.35E-13 | 0.26281724 | 0.355 | 0.278 | 1.91E-09 | T cells | Timm23    |
| 1.67E-13 | -0.3013566 | 0.108 | 0.17  | 2.36E-09 | T cells | Pxn       |
| 1.74E-13 | -0.2859685 | 0.124 | 0.187 | 2.47E-09 | T cells | Gsdmd     |
| 1.78E-13 | 0.2591089  | 0.457 | 0.378 | 2.53E-09 | T cells | Skp1a     |
| 1.85E-13 | 0.27348923 | 0.16  | 0.104 | 2.62E-09 | T cells | Man1a2    |
| 1.97E-13 | 0.26711673 | 0.504 | 0.411 | 2.78E-09 | T cells | Hspd1     |
| 2.21E-13 | 0.26341869 | 0.252 | 0.181 | 3.13E-09 | T cells | Sms       |
| 2.27E-13 | 0.39007291 | 0.459 | 0.377 | 3.21E-09 | T cells | H2-Q6     |
| 2.27E-13 | 0.2792745  | 0.275 | 0.208 | 3.21E-09 | T cells | Nhp2      |
| 2.37E-13 | -0.28172   | 0.145 | 0.211 | 3.35E-09 | T cells | Necap2    |
| 2.71E-13 | 0.27480701 | 0.25  | 0.184 | 3.84E-09 | T cells | Pcmt1     |
| 2.80E-13 | 0.27338774 | 0.48  | 0.407 | 3.97E-09 | T cells | Sec11c    |
| 3.04E-13 | -0.3189701 | 0.101 | 0.159 | 4.30E-09 | T cells | Chchd10   |
| 3.20E-13 | 0.25624614 | 0.224 | 0.162 | 4.52E-09 | T cells | Mpdu1     |
| 3.83E-13 | -0.5690157 | 0.261 | 0.313 | 5.43E-09 | T cells | Anxa5     |
| 3.89E-13 | 0.26379478 | 0.183 | 0.125 | 5.50E-09 | T cells | Arl4a     |
| 3.90E-13 | 0.27330716 | 0.2   | 0.138 | 5.52E-09 | T cells | Smc3      |
| 4.33E-13 | 0.26271475 | 0.487 | 0.407 | 6.14E-09 | T cells | Rgs2      |
| 4.49E-13 | -0.3114909 | 0.529 | 0.592 | 6.36E-09 | T cells | Cytip     |
| 4.75E-13 | 0.26284528 | 0.209 | 0.144 | 6.72E-09 | T cells | Suco      |
| 4.75E-13 | -0.3151354 | 0.446 | 0.504 | 6.73E-09 | T cells | Arf1      |
| 5.63E-13 | 0.27678175 | 0.371 | 0.299 | 7.96E-09 | T cells | Lman2     |
| 5.63E-13 | -0.2738913 | 0.329 | 0.404 | 7.97E-09 | T cells | Flna      |
| 5.94E-13 | -0.3637447 | 0.189 | 0.256 | 8.41E-09 | T cells | Sde2      |
| 6.47E-13 | 0.2684696  | 0.175 | 0.118 | 9.16E-09 | T cells | Supt16    |
| 6.51E-13 | -0.345372  | 0.062 | 0.109 | 9.22E-09 | T cells | Mirt1     |
| 6.62E-13 | -0.3172159 | 0.16  | 0.225 | 9.37E-09 | T cells | Atp6ap2   |
| 8.35E-13 | 0.26098788 | 0.334 | 0.257 | 1.18E-08 | T cells | Phf20l1   |
| 8.51E-13 | -0.2605249 | 0.364 | 0.437 | 1.21E-08 | T cells | Ptbp3     |
| 8.93E-13 | 0.26658246 | 0.309 | 0.237 | 1.26E-08 | T cells | Esyt1     |
| 9.12E-13 | 0.35876506 | 0.181 | 0.122 | 1.29E-08 | T cells | Lyst      |
| 9.61E-13 | 0.2589181  | 0.505 | 0.43  | 1.36E-08 | T cells | Tmem258   |
| 9.85E-13 | 0.3652704  | 0.352 | 0.28  | 1.39E-08 | T cells | Lrrfip1   |
| 1.06E-12 | -0.3106874 | 0.543 | 0.579 | 1.51E-08 | T cells | Gnai2     |
| 1.08E-12 | -0.3176836 | 0.361 | 0.424 | 1.54E-08 | T cells | Ptpn1     |
| 1.22E-12 | 0.31497073 | 0.25  | 0.186 | 1.72E-08 | T cells | Pdcd4     |
| 1.34E-12 | 0.34812269 | 0.297 | 0.23  | 1.89E-08 | T cells | Gpr65     |
| 1.47E-12 | -0.2600443 | 0.107 | 0.165 | 2.09E-08 | T cells | Ncoa3     |
| 1.89E-12 | -0.2541229 | 0.163 | 0.228 | 2.67E-08 | T cells | Rcsd1     |
| 1.93E-12 | -0.399149  | 0.08  | 0.131 | 2.73E-08 | T cells | Hist1h2bc |
| 2.07E-12 | 0.25432245 | 0.229 | 0.166 | 2.93E-08 | T cells | Nap1l4    |
| 2.07E-12 | 0.34080122 | 0.14  | 0.089 | 2.94E-08 | T cells | Smg6      |
| 2.10E-12 | -0.2673305 | 0.134 | 0.197 | 2.97E-08 | T cells | Il10rb    |
| 2.60E-12 | 0.25498491 | 0.165 | 0.112 | 3.68E-08 | T cells | Zdhhc3    |
| 2.77E-12 | 0.25915801 | 0.349 | 0.276 | 3.92E-08 | T cells | Dusp11    |
| 2.81E-12 | -0.6600958 | 0.331 | 0.378 | 3.98E-08 | T cells | Cstb      |

|          |            |       |       |          |         |          |
|----------|------------|-------|-------|----------|---------|----------|
| 3.16E-12 | 0.26129358 | 0.163 | 0.11  | 4.48E-08 | T cells | Tm2d3    |
| 3.58E-12 | 0.30717909 | 0.352 | 0.278 | 5.07E-08 | T cells | Mier1    |
| 3.65E-12 | 0.27528918 | 0.184 | 0.125 | 5.17E-08 | T cells | Ccdc88c  |
| 3.84E-12 | -0.2688902 | 0.25  | 0.318 | 5.44E-08 | T cells | Vapa     |
| 4.14E-12 | 0.31000995 | 0.62  | 0.556 | 5.86E-08 | T cells | Myh9     |
| 4.25E-12 | -0.3520017 | 0.257 | 0.319 | 6.01E-08 | T cells | M6pr     |
| 4.51E-12 | -0.2689512 | 0.693 | 0.704 | 6.38E-08 | T cells | Gng5     |
| 4.70E-12 | -0.2529723 | 0.137 | 0.199 | 6.65E-08 | T cells | Limd1    |
| 5.01E-12 | -0.3328966 | 0.239 | 0.305 | 7.10E-08 | T cells | Kras     |
| 6.39E-12 | -0.2519048 | 0.207 | 0.276 | 9.04E-08 | T cells | Cltc     |
| 6.54E-12 | 0.26781635 | 0.222 | 0.162 | 9.26E-08 | T cells | Gspt1    |
| 6.87E-12 | 0.2548627  | 0.411 | 0.338 | 9.72E-08 | T cells | Ddx24    |
| 8.67E-12 | 0.37074645 | 0.622 | 0.539 | 1.23E-07 | T cells | Hsp90b1  |
| 8.68E-12 | 0.25631625 | 0.261 | 0.199 | 1.23E-07 | T cells | Tmem208  |
| 9.60E-12 | 0.25417912 | 0.22  | 0.16  | 1.36E-07 | T cells | Yipf3    |
| 9.68E-12 | 0.30849342 | 0.261 | 0.198 | 1.37E-07 | T cells | Fnbp1    |
| 9.88E-12 | -0.2550304 | 0.112 | 0.169 | 1.40E-07 | T cells | Mapk14   |
| 1.11E-11 | -0.3514861 | 0.739 | 0.749 | 1.57E-07 | T cells | Ucp2     |
| 1.29E-11 | -1.0620302 | 0.444 | 0.437 | 1.83E-07 | T cells | Ctsb     |
| 1.32E-11 | 0.25222626 | 0.249 | 0.189 | 1.87E-07 | T cells | Dnajc2   |
| 1.39E-11 | 0.26521987 | 0.169 | 0.115 | 1.97E-07 | T cells | Cyld     |
| 1.48E-11 | -0.5104636 | 0.061 | 0.105 | 2.10E-07 | T cells | Myc      |
| 1.61E-11 | -0.2547239 | 0.132 | 0.19  | 2.28E-07 | T cells | Cmtm6    |
| 1.69E-11 | 0.26746645 | 0.26  | 0.196 | 2.40E-07 | T cells | Rsb1l1   |
| 1.76E-11 | 0.26005804 | 0.373 | 0.306 | 2.49E-07 | T cells | Epsti1   |
| 1.89E-11 | 0.28156676 | 0.267 | 0.203 | 2.68E-07 | T cells | Actn4    |
| 1.98E-11 | -0.2807558 | 0.133 | 0.192 | 2.80E-07 | T cells | Ttc7     |
| 2.54E-11 | -0.2511746 | 0.101 | 0.156 | 3.60E-07 | T cells | Fem1c    |
| 3.28E-11 | -0.2731866 | 0.148 | 0.206 | 4.64E-07 | T cells | Spg21    |
| 3.51E-11 | -0.2623252 | 0.087 | 0.138 | 4.98E-07 | T cells | Slc43a2  |
| 4.02E-11 | -0.2768074 | 0.107 | 0.161 | 5.69E-07 | T cells | Trim12a  |
| 4.10E-11 | 0.25162928 | 0.406 | 0.34  | 5.80E-07 | T cells | Rnasek   |
| 4.58E-11 | -0.2516846 | 0.129 | 0.187 | 6.49E-07 | T cells | Unc119   |
| 5.39E-11 | 0.2501033  | 0.559 | 0.491 | 7.63E-07 | T cells | Ncl      |
| 6.00E-11 | -0.2818178 | 0.468 | 0.52  | 8.49E-07 | T cells | Pcbp1    |
| 7.47E-11 | -0.2864609 | 0.113 | 0.168 | 1.06E-06 | T cells | Mdm2     |
| 8.20E-11 | -0.2584467 | 0.107 | 0.161 | 1.16E-06 | T cells | Rin3     |
| 8.58E-11 | 0.34572638 | 0.301 | 0.238 | 1.21E-06 | T cells | Rock1    |
| 8.86E-11 | 0.34573629 | 0.111 | 0.069 | 1.25E-06 | T cells | Tmem64   |
| 8.92E-11 | 0.2883824  | 0.138 | 0.091 | 1.26E-06 | T cells | Casp8ap2 |
| 1.26E-10 | 0.3218152  | 0.498 | 0.419 | 1.78E-06 | T cells | Pdia3    |
| 1.50E-10 | -0.3421953 | 0.198 | 0.258 | 2.13E-06 | T cells | Etf1     |
| 1.54E-10 | 0.31533682 | 0.293 | 0.231 | 2.18E-06 | T cells | Dock8    |
| 1.56E-10 | 0.38580664 | 0.28  | 0.219 | 2.21E-06 | T cells | Atrx     |
| 1.61E-10 | 0.29098407 | 0.15  | 0.102 | 2.27E-06 | T cells | Rasa1    |
| 1.64E-10 | -0.3144649 | 0.227 | 0.285 | 2.32E-06 | T cells | Rnh1     |
| 1.65E-10 | 0.26097921 | 0.249 | 0.193 | 2.34E-06 | T cells | Mrpl12   |
| 2.06E-10 | 0.28616839 | 0.25  | 0.193 | 2.91E-06 | T cells | Rgs10    |



|          |            |       |       |            |         |            |
|----------|------------|-------|-------|------------|---------|------------|
| 2.73E-10 | 0.28353349 | 0.378 | 0.31  | 3.86E-06   | T cells | Ythdc1     |
| 3.35E-10 | -0.2723886 | 0.157 | 0.212 | 4.75E-06   | T cells | Cers2      |
| 3.43E-10 | 0.2955341  | 0.446 | 0.383 | 4.85E-06   | T cells | Sf3b2      |
| 3.66E-10 | -0.2964404 | 0.059 | 0.101 | 5.18E-06   | T cells | Bambi      |
| 3.89E-10 | -0.3217455 | 0.369 | 0.429 | 5.50E-06   | T cells | Txnip      |
| 4.03E-10 | 0.26075005 | 0.446 | 0.388 | 5.70E-06   | T cells | Anp32b     |
| 4.46E-10 | 0.26314644 | 0.154 | 0.107 | 6.31E-06   | T cells | Notch1     |
| 4.88E-10 | -0.3035917 | 0.08  | 0.124 | 6.91E-06   | T cells | Hist2h2aa1 |
| 5.24E-10 | 0.28538931 | 0.295 | 0.236 | 7.42E-06   | T cells | Itgb7      |
| 5.93E-10 | 0.36357543 | 0.248 | 0.193 | 8.39E-06   | T cells | Lnpep      |
| 6.15E-10 | -0.3428017 | 0.457 | 0.507 | 8.71E-06   | T cells | Ezr        |
| 6.41E-10 | -0.2585954 | 0.087 | 0.134 | 9.07E-06   | T cells | Pnkp       |
| 7.62E-10 | -0.2513192 | 0.098 | 0.147 | 1.08E-05   | T cells | Arhgef2    |
| 9.49E-10 | -0.3224467 | 0.298 | 0.352 | 1.34E-05   | T cells | Iscu       |
| 1.02E-09 | 0.25421916 | 0.124 | 0.082 | 1.44E-05   | T cells | Xrn1       |
| 1.03E-09 | -0.4083681 | 0.271 | 0.32  | 1.46E-05   | T cells | Pgam1      |
| 1.19E-09 | -0.2546963 | 0.106 | 0.156 | 1.68E-05   | T cells | Phyh       |
| 1.42E-09 | 0.26750069 | 0.421 | 0.365 | 2.02E-05   | T cells | Nap1l1     |
| 1.50E-09 | -0.3984724 | 0.393 | 0.437 | 2.12E-05   | T cells | Irf1       |
| 1.67E-09 | -0.2820998 | 0.239 | 0.297 | 2.36E-05   | T cells | Ifnar2     |
| 1.74E-09 | 0.2732129  | 0.395 | 0.329 | 2.46E-05   | T cells | Rbm25      |
| 2.50E-09 | -0.4466749 | 0.084 | 0.128 | 3.54E-05   | T cells | Tnf        |
| 2.55E-09 | -0.252765  | 0.067 | 0.108 | 3.61E-05   | T cells | Seps2      |
| 2.93E-09 | 0.28489703 | 0.2   | 0.149 | 4.14E-05   | T cells | Arid5b     |
| 4.02E-09 | 0.35341438 | 0.258 | 0.206 | 5.70E-05   | T cells | Baz1a      |
| 4.18E-09 | -0.3404117 | 0.241 | 0.292 | 5.92E-05   | T cells | Hmgn1      |
| 4.27E-09 | 0.25947905 | 0.269 | 0.215 | 6.05E-05   | T cells | Ubn1       |
| 5.20E-09 | -0.2966702 | 0.21  | 0.265 | 7.36E-05   | T cells | Dnajc7     |
| 6.24E-09 | -0.4031688 | 0.102 | 0.147 | 8.83E-05   | T cells | Bag3       |
| 6.68E-09 | -0.2749129 | 0.241 | 0.295 | 9.46E-05   | T cells | Cmpk1      |
| 7.03E-09 | -0.2999431 | 0.102 | 0.145 | 9.95E-05   | T cells | Nrm        |
| 7.82E-09 | 0.28005249 | 0.225 | 0.172 | 0.00011074 | T cells | Bod1l      |
| 1.53E-08 | 0.27821694 | 0.132 | 0.093 | 0.00021701 | T cells | Mdfic      |
| 1.73E-08 | -0.7131343 | 0.109 | 0.151 | 0.00024503 | T cells | Adam8      |
| 2.81E-08 | 0.26249177 | 0.235 | 0.188 | 0.00039788 | T cells | Sdf2       |
| 3.81E-08 | 0.39086212 | 0.42  | 0.367 | 0.00053909 | T cells | Itga4      |
| 4.30E-08 | -0.5286531 | 0.069 | 0.105 | 0.00060934 | T cells | Sh2d3c     |
| 4.46E-08 | -0.2754744 | 0.098 | 0.139 | 0.0006311  | T cells | Carhsp1    |
| 4.74E-08 | -0.2859753 | 0.273 | 0.32  | 0.00067049 | T cells | Coro1b     |
| 5.24E-08 | 0.25217285 | 0.142 | 0.102 | 0.00074191 | T cells | Trp53inp1  |
| 1.05E-07 | -0.314765  | 0.15  | 0.194 | 0.00148988 | T cells | Cdkn2d     |
| 1.10E-07 | 0.25511664 | 0.298 | 0.248 | 0.00155248 | T cells | Orai1      |
| 1.11E-07 | -0.3020256 | 0.071 | 0.107 | 0.00157133 | T cells | Abtb1      |
| 1.34E-07 | -0.397677  | 0.509 | 0.538 | 0.00189138 | T cells | Ppp1r15a   |
| 2.03E-07 | -0.3219279 | 0.274 | 0.316 | 0.00287969 | T cells | Rbm38      |
| 2.36E-07 | -0.3283474 | 0.376 | 0.419 | 0.0033404  | T cells | Ifrd1      |
| 2.41E-07 | -0.2555544 | 0.206 | 0.255 | 0.00340453 | T cells | Ehd1       |
| 2.68E-07 | -0.2730351 | 0.328 | 0.374 | 0.0037982  | T cells | Rbms1      |

|            |            |       |       |            |           |           |
|------------|------------|-------|-------|------------|-----------|-----------|
| 2.88E-07   | -0.2536514 | 0.085 | 0.12  | 0.00407084 | T cells   | Cdt1      |
| 3.28E-07   | -0.3182783 | 0.377 | 0.415 | 0.00464427 | T cells   | Slfn2     |
| 3.73E-07   | -0.4238491 | 0.593 | 0.582 | 0.00528005 | T cells   | Cd37      |
| 4.61E-07   | -0.3192339 | 0.246 | 0.289 | 0.00652713 | T cells   | Tmem123   |
| 4.64E-07   | 0.25461243 | 0.401 | 0.352 | 0.00657117 | T cells   | Hnrnpu    |
| 8.58E-07   | 0.27268509 | 0.188 | 0.147 | 0.01214009 | T cells   | Kmt2a     |
| 1.03E-06   | -0.2595098 | 0.354 | 0.4   | 0.01459316 | T cells   | Cdc42se1  |
| 1.23E-06   | -0.2693163 | 0.088 | 0.124 | 0.01744928 | T cells   | Dck       |
| 1.63E-06   | -0.5976314 | 0.452 | 0.347 | 0.02305068 | T cells   | Pglyrp1   |
| 1.80E-06   | 0.50603194 | 0.149 | 0.116 | 0.02554431 | T cells   | Maf       |
| 2.51E-06   | -0.398082  | 0.528 | 0.537 | 0.0355866  | T cells   | Pkm       |
| 3.81E-06   | -0.2619329 | 0.13  | 0.165 | 0.05399435 | T cells   | Tcf3      |
| 5.80E-06   | -0.7798911 | 0.278 | 0.309 | 0.08216516 | T cells   | Mxd1      |
| 7.14E-06   | 0.93863682 | 0.234 | 0.199 | 0.10109164 | T cells   | Hist1h2ap |
| 1.06E-05   | 0.2914319  | 0.432 | 0.391 | 0.15015153 | T cells   | Stat3     |
| 1.75E-05   | -0.2907709 | 0.691 | 0.694 | 0.24761652 | T cells   | mt-Nd5    |
| 2.42E-05   | -0.3204312 | 0.275 | 0.311 | 0.34186824 | T cells   | Fam32a    |
| 4.43E-05   | -0.2500524 | 0.187 | 0.224 | 0.62733401 | T cells   | 7-Mar     |
| 5.57E-05   | -0.3049829 | 0.168 | 0.203 | 0.78811992 | T cells   | Icam1     |
| 0.0001031  | -0.4013536 | 0.927 | 0.926 |            | 1 T cells | Srgn      |
| 0.0001035  | 0.27314386 | 0.316 | 0.281 |            | 1 T cells | Mycbp2    |
| 0.00016881 | -0.2684029 | 0.14  | 0.165 |            | 1 T cells | Atp2a3    |
| 0.0002832  | -0.279716  | 0.263 | 0.292 |            | 1 T cells | Sod2      |
| 0.0004341  | -0.2901735 | 0.56  | 0.548 |            | 1 T cells | Tagln2    |
| 0.00064818 | -0.2682768 | 0.144 | 0.173 |            | 1 T cells | Entpd1    |
| 0.00253019 | -0.4191775 | 0.912 | 0.851 |            | 1 T cells | Hspa8     |
| 0          | 4.83551895 | 0.977 | 0.026 |            | 0 B cells | Cd79a     |
| 0          | 3.90911137 | 0.845 | 0.023 |            | 0 B cells | Ly6d      |
| 0          | 3.80151333 | 0.902 | 0.016 |            | 0 B cells | Ebf1      |
| 0          | 3.50972356 | 0.844 | 0.068 |            | 0 B cells | Cd79b     |
| 0          | 3.27191535 | 0.866 | 0.046 |            | 0 B cells | H2-DMb2   |
| 0          | 3.034436   | 0.729 | 0.009 |            | 0 B cells | Fcmr      |
| 0          | 2.95801405 | 0.843 | 0.112 |            | 0 B cells | Ccr7      |
| 0          | 2.87270068 | 0.704 | 0.01  |            | 0 B cells | Ms4a1     |
| 0          | 2.8686785  | 0.773 | 0.039 |            | 0 B cells | H2-Ob     |
| 0          | 2.51804436 | 0.699 | 0.094 |            | 0 B cells | Mef2c     |
| 0          | 2.48392078 | 0.635 | 0.008 |            | 0 B cells | Cd19      |
| 0          | 2.38477644 | 0.64  | 0.05  |            | 0 B cells | Cd55      |
| 0          | 2.33682018 | 0.537 | 0.007 |            | 0 B cells | Fcer2a    |
| 0          | 2.21018829 | 0.568 | 0.017 |            | 0 B cells | Bank1     |
| 0          | 2.05972437 | 0.491 | 0.007 |            | 0 B cells | Blk       |
| 0          | 2.02502398 | 0.708 | 0.185 |            | 0 B cells | Cd83      |
| 0          | 2.02356828 | 0.477 | 0.01  |            | 0 B cells | Fcrla     |
| 0          | 2.01023513 | 0.489 | 0.01  |            | 0 B cells | Mzb1      |
| 0          | 1.93950125 | 0.748 | 0.267 |            | 0 B cells | Foxp1     |
| 0          | 1.92322377 | 0.45  | 0.006 |            | 0 B cells | Scd1      |
| 0          | 1.91948767 | 0.814 | 0.367 |            | 0 B cells | Serp1     |
| 0          | 1.88684101 | 0.527 | 0.052 |            | 0 B cells | Ralgps2   |

|           |            |       |       |           |         |           |
|-----------|------------|-------|-------|-----------|---------|-----------|
| 0         | 1.85852945 | 0.999 | 0.539 | 0         | B cells | Cd74      |
| 0         | 1.84479608 | 0.58  | 0.076 | 0         | B cells | Cd24a     |
| 0         | 1.74969057 | 0.918 | 0.555 | 0         | B cells | Klf2      |
| 0         | 1.74353533 | 0.466 | 0.049 | 0         | B cells | H2-Oa     |
| 0         | 1.73352953 | 0.457 | 0.032 | 0         | B cells | Blk       |
| 0         | 1.68660368 | 0.989 | 0.366 | 0         | B cells | H2-Aa     |
| 0         | 1.68300755 | 0.385 | 0.026 | 0         | B cells | Serpib1a  |
| 0         | 1.62191853 | 0.324 | 0.004 | 0         | B cells | Vpreb3    |
| 0         | 1.60123349 | 0.377 | 0.012 | 0         | B cells | Siglecg   |
| 0         | 1.59141744 | 0.383 | 0.011 | 0         | B cells | Snn       |
| 0         | 1.58617913 | 0.347 | 0.005 | 0         | B cells | Pou2af1   |
| 0         | 1.58464119 | 0.361 | 0.034 | 0         | B cells | Fam43a    |
| 0         | 1.56000185 | 0.356 | 0.005 | 0         | B cells | Cxcr5     |
| 0         | 1.55583255 | 0.868 | 0.501 | 0         | B cells | Cd37      |
| 0         | 1.5398093  | 0.42  | 0.059 | 0         | B cells | Bach2     |
| 0         | 1.49112791 | 0.981 | 0.882 | 0         | B cells | Rps27     |
| 0         | 1.41008248 | 0.322 | 0.005 | 0         | B cells | Pax5      |
| 0         | 1.26605728 | 0.97  | 0.829 | 0         | B cells | H3f3a     |
| 0         | 1.26436957 | 0.298 | 0.009 | 0         | B cells | Cd22      |
| 0         | 1.16182464 | 0.983 | 0.361 | 0         | B cells | H2-Eb1    |
| 0         | 1.15183999 | 0.974 | 0.864 | 0         | B cells | Rps29     |
| 0         | 1.06761174 | 0.968 | 0.799 | 0         | B cells | Rps28     |
| 0         | 1.01164923 | 0.978 | 0.35  | 0         | B cells | H2-Ab1    |
| 0         | 0.96605027 | 0.968 | 0.837 | 0         | B cells | Rpl35a    |
| 0         | 0.93603265 | 0.98  | 0.878 | 0         | B cells | Rps20     |
| 0         | 0.91251389 | 0.972 | 0.864 | 0         | B cells | Rpl21     |
| 0         | -1.7897998 | 0.87  | 0.938 | 0         | B cells | Gapdh     |
| 0         | -2.1741996 | 0.009 | 0.564 | 0         | B cells | Fyb       |
| 0         | -2.5869766 | 0.028 | 0.586 | 0         | B cells | Anxa2     |
| 0         | -3.1575437 | 0.222 | 0.891 | 0         | B cells | Fxyd5     |
| 0         | -3.3490641 | 0.076 | 0.661 | 0         | B cells | Lgals1    |
| 0         | -3.3973365 | 0.009 | 0.585 | 0         | B cells | Ms4a4b    |
| 0         | -3.5596169 | 0.015 | 0.566 | 0         | B cells | Cd3g      |
| 0         | -3.8780157 | 0.082 | 0.773 | 0         | B cells | S100a6    |
| 0         | -4.2270345 | 0.097 | 0.708 | 0         | B cells | AW112010  |
| 0         | -4.6399093 | 0.016 | 0.598 | 0         | B cells | Nkg7      |
| 0         | -6.0812901 | 0.088 | 0.696 | 0         | B cells | Ccl5      |
| 3.59E-304 | 1.16459022 | 0.253 | 0.005 | 5.08E-300 | B cells | Spib      |
| 3.70E-304 | 0.78365741 | 0.982 | 0.927 | 5.24E-300 | B cells | Rps24     |
| 4.68E-302 | 0.85310656 | 0.977 | 0.869 | 6.63E-298 | B cells | Rps21     |
| 2.01E-299 | -4.0514674 | 0.027 | 0.544 | 2.84E-295 | B cells | Fcer1g    |
| 2.47E-299 | 1.37973951 | 0.932 | 0.734 | 3.50E-295 | B cells | Jund      |
| 4.04E-296 | -2.9913551 | 0.009 | 0.527 | 5.72E-292 | B cells | Cd3d      |
| 1.38E-295 | -3.0234766 | 0.009 | 0.527 | 1.96E-291 | B cells | Cd3e      |
| 8.11E-290 | -2.8048641 | 0.049 | 0.556 | 1.15E-285 | B cells | Lgals3    |
| 8.68E-290 | 1.2727232  | 0.262 | 0.01  | 1.23E-285 | B cells | Tnfrsf13c |
| 2.48E-282 | 1.26771836 | 0.237 | 0.005 | 3.51E-278 | B cells | Hs3st1    |
| 2.31E-281 | 1.57689039 | 0.513 | 0.144 | 3.27E-277 | B cells | Ptp4a3    |

|           |            |       |       |           |         |          |
|-----------|------------|-------|-------|-----------|---------|----------|
| 7.79E-281 | 0.89292822 | 0.971 | 0.833 | 1.10E-276 | B cells | Rps19    |
| 2.67E-278 | 1.16070193 | 0.277 | 0.018 | 3.77E-274 | B cells | Gga2     |
| 4.53E-278 | 1.62813004 | 0.676 | 0.283 | 6.41E-274 | B cells | Rel      |
| 7.76E-273 | -0.9931617 | 0.991 | 0.991 | 1.10E-268 | B cells | Actb     |
| 5.68E-271 | -2.6259527 | 0.013 | 0.502 | 8.04E-267 | B cells | S100a4   |
| 8.31E-270 | 0.97311808 | 0.981 | 0.779 | 1.18E-265 | B cells | Ly6e     |
| 9.23E-268 | -4.1630133 | 0.023 | 0.508 | 1.31E-263 | B cells | Ccl4     |
| 2.21E-263 | 1.37851324 | 0.341 | 0.046 | 3.13E-259 | B cells | Fchsd2   |
| 1.74E-259 | 0.81913068 | 0.97  | 0.852 | 2.46E-255 | B cells | Rpl38    |
| 3.54E-259 | 1.42513289 | 0.489 | 0.117 | 5.01E-255 | B cells | S1pr1    |
| 1.06E-256 | 1.36074453 | 0.812 | 0.466 | 1.50E-252 | B cells | Tsc22d3  |
| 2.21E-256 | 1.77084093 | 0.81  | 0.52  | 3.12E-252 | B cells | Nr4a1    |
| 3.47E-254 | 0.85216782 | 0.96  | 0.828 | 4.91E-250 | B cells | Rpl17    |
| 1.51E-251 | -1.801209  | 0.283 | 0.697 | 2.13E-247 | B cells | Npc2     |
| 3.32E-251 | 1.3596329  | 0.319 | 0.04  | 4.70E-247 | B cells | B3gnt5   |
| 5.37E-251 | -1.8299862 | 0.135 | 0.616 | 7.60E-247 | B cells | Selplg   |
| 2.13E-250 | 1.39397601 | 0.807 | 0.486 | 3.02E-246 | B cells | Zfp36l1  |
| 3.62E-249 | 1.39151326 | 0.422 | 0.094 | 5.12E-245 | B cells | Cerk     |
| 3.81E-248 | -2.2638663 | 0.007 | 0.464 | 5.39E-244 | B cells | Lat      |
| 5.94E-246 | -1.0296993 | 0.94  | 0.954 | 8.42E-242 | B cells | Pfn1     |
| 1.36E-244 | -1.3271033 | 0.65  | 0.846 | 1.93E-240 | B cells | Myl6     |
| 8.65E-243 | -1.935571  | 0.109 | 0.578 | 1.22E-238 | B cells | Ctsd     |
| 6.29E-242 | -2.1780428 | 0.06  | 0.522 | 8.91E-238 | B cells | Id2      |
| 7.30E-241 | -1.3081215 | 0.694 | 0.862 | 1.03E-236 | B cells | Itm2b    |
| 2.57E-237 | 1.41298642 | 0.546 | 0.192 | 3.64E-233 | B cells | Hmgn1    |
| 1.02E-236 | -3.1347992 | 0.005 | 0.447 | 1.44E-232 | B cells | Cd8b1    |
| 3.55E-236 | -2.2390137 | 0.381 | 0.731 | 5.02E-232 | B cells | S100a11  |
| 2.86E-228 | 1.42846905 | 0.347 | 0.064 | 4.05E-224 | B cells | Hvcn1    |
| 1.61E-225 | 1.26758752 | 0.535 | 0.18  | 2.27E-221 | B cells | Syk      |
| 3.10E-223 | -0.8615018 | 0.983 | 0.983 | 4.38E-219 | B cells | Tmsb4x   |
| 4.80E-222 | 0.98960552 | 0.223 | 0.013 | 6.80E-218 | B cells | Fcrl1    |
| 1.68E-220 | 1.17133824 | 0.923 | 0.747 | 2.38E-216 | B cells | Btg1     |
| 2.50E-218 | 0.69993276 | 0.97  | 0.869 | 3.53E-214 | B cells | Rpl39    |
| 4.12E-217 | -3.6775857 | 0.144 | 0.529 | 5.83E-213 | B cells | Tyrobp   |
| 6.15E-216 | 1.1295882  | 0.279 | 0.035 | 8.71E-212 | B cells | St6gal1  |
| 5.30E-214 | 1.12817735 | 0.258 | 0.028 | 7.50E-210 | B cells | Btla     |
| 1.20E-213 | 1.34924761 | 0.506 | 0.185 | 1.70E-209 | B cells | Snx2     |
| 1.43E-213 | 0.88337641 | 0.183 | 0.004 | 2.02E-209 | B cells | H2-Eb2   |
| 1.75E-212 | -2.2681132 | 0.006 | 0.416 | 2.48E-208 | B cells | Ctsw     |
| 1.02E-211 | 0.69945609 | 0.968 | 0.835 | 1.44E-207 | B cells | Rpl35    |
| 1.42E-211 | -2.0315243 | 0.009 | 0.418 | 2.01E-207 | B cells | Thy1     |
| 3.93E-210 | -0.8946082 | 0.911 | 0.928 | 5.56E-206 | B cells | B2m      |
| 3.09E-209 | 1.14812399 | 0.272 | 0.036 | 4.37E-205 | B cells | Snx8     |
| 8.10E-209 | 1.19663316 | 0.261 | 0.03  | 1.15E-204 | B cells | Cpm      |
| 8.12E-208 | 1.08324613 | 0.244 | 0.024 | 1.15E-203 | B cells | Bcl11a   |
| 4.34E-206 | 1.35893512 | 0.394 | 0.102 | 6.14E-202 | B cells | Ero1lb   |
| 1.62E-204 | 1.26721654 | 0.319 | 0.058 | 2.29E-200 | B cells | Trp53i11 |
| 6.21E-204 | 1.23761568 | 0.304 | 0.051 | 8.79E-200 | B cells | Irf4     |

|           |            |       |       |           |         |         |
|-----------|------------|-------|-------|-----------|---------|---------|
| 1.79E-203 | -2.3094791 | 0.054 | 0.465 | 2.53E-199 | B cells | Rgs1    |
| 5.09E-203 | -2.5906199 | 0.006 | 0.403 | 7.21E-199 | B cells | Cd8a    |
| 7.32E-202 | 1.30563392 | 0.441 | 0.139 | 1.04E-197 | B cells | Pkig    |
| 1.45E-200 | 0.67725798 | 0.978 | 0.889 | 2.06E-196 | B cells | Rpl37a  |
| 1.07E-198 | -1.5446999 | 0.041 | 0.45  | 1.51E-194 | B cells | Ms4a6b  |
| 3.48E-198 | 1.11976768 | 0.466 | 0.131 | 4.92E-194 | B cells | Satb1   |
| 3.10E-197 | 0.81427679 | 0.155 | 0.001 | 4.39E-193 | B cells | Cr2     |
| 3.36E-197 | -2.3578822 | 0.008 | 0.396 | 4.75E-193 | B cells | Klrd1   |
| 1.99E-195 | -2.2429196 | 0.133 | 0.532 | 2.81E-191 | B cells | Ctsb    |
| 4.75E-195 | 1.27589083 | 0.459 | 0.15  | 6.73E-191 | B cells | Prkcb   |
| 6.74E-195 | 1.35425531 | 0.365 | 0.088 | 9.54E-191 | B cells | Dmxl1   |
| 5.84E-194 | 1.26616295 | 0.345 | 0.076 | 8.27E-190 | B cells | Swap70  |
| 1.40E-193 | -1.6671515 | 0.146 | 0.552 | 1.99E-189 | B cells | Hcst    |
| 1.49E-193 | 0.63691293 | 0.974 | 0.861 | 2.11E-189 | B cells | Rps13   |
| 1.33E-190 | -1.5703579 | 0.305 | 0.663 | 1.88E-186 | B cells | Tspo    |
| 1.53E-190 | -1.7395241 | 0.065 | 0.459 | 2.17E-186 | B cells | Ptms    |
| 3.27E-190 | -1.1147273 | 0.645 | 0.823 | 4.63E-186 | B cells | Arpc1b  |
| 4.30E-189 | -3.1388418 | 0.022 | 0.399 | 6.08E-185 | B cells | Ifitm2  |
| 2.03E-188 | -1.7668435 | 0.029 | 0.411 | 2.87E-184 | B cells | Lck     |
| 8.27E-186 | -2.8810434 | 0.022 | 0.394 | 1.17E-181 | B cells | Alox5ap |
| 1.92E-184 | 0.62772363 | 0.972 | 0.871 | 2.72E-180 | B cells | Rpl27a  |
| 3.18E-183 | 1.31220903 | 0.613 | 0.314 | 4.50E-179 | B cells | Snx5    |
| 4.06E-183 | 1.13453035 | 0.349 | 0.084 | 5.75E-179 | B cells | Sh3bp5  |
| 3.99E-182 | -3.387887  | 0.034 | 0.403 | 5.64E-178 | B cells | Ifitm3  |
| 1.03E-179 | 1.19508412 | 0.701 | 0.396 | 1.46E-175 | B cells | Dusp2   |
| 1.59E-177 | 0.79145469 | 0.148 | 0.002 | 2.24E-173 | B cells | Chst3   |
| 3.67E-177 | 1.13660338 | 0.798 | 0.565 | 5.20E-173 | B cells | Stk17b  |
| 4.99E-177 | 0.58212977 | 0.977 | 0.914 | 7.07E-173 | B cells | Eef1a1  |
| 1.11E-176 | -1.8782717 | 0.006 | 0.363 | 1.58E-172 | B cells | Cst7    |
| 4.90E-176 | -1.5980514 | 0.168 | 0.551 | 6.94E-172 | B cells | Txn1    |
| 6.41E-174 | -2.2674872 | 0.004 | 0.355 | 9.07E-170 | B cells | Pdcd1   |
| 7.96E-174 | 1.07561568 | 0.533 | 0.201 | 1.13E-169 | B cells | Sell    |
| 8.08E-174 | -4.4618532 | 0.078 | 0.433 | 1.14E-169 | B cells | Lyz2    |
| 1.70E-173 | 1.0117933  | 0.732 | 0.427 | 2.41E-169 | B cells | Serinc3 |
| 2.77E-173 | -2.0208649 | 0.005 | 0.355 | 3.93E-169 | B cells | Tigit   |
| 4.93E-173 | 1.03997681 | 0.715 | 0.391 | 6.97E-169 | B cells | Ets1    |
| 7.51E-172 | 0.36738384 | 0.993 | 0.883 | 1.06E-167 | B cells | mt-Atp8 |
| 6.13E-170 | 1.2923029  | 0.464 | 0.169 | 8.68E-166 | B cells | P2ry10  |
| 7.77E-170 | -1.9354583 | 0.003 | 0.347 | 1.10E-165 | B cells | Icos    |
| 1.07E-169 | -1.7489902 | 0.009 | 0.357 | 1.51E-165 | B cells | Lilrb4a |
| 3.70E-169 | -1.7172533 | 0.013 | 0.362 | 5.24E-165 | B cells | Fgl2    |
| 3.25E-168 | 1.19725988 | 0.528 | 0.24  | 4.60E-164 | B cells | Smim14  |
| 7.89E-168 | -1.8985554 | 0.065 | 0.425 | 1.12E-163 | B cells | Sh2d2a  |
| 2.48E-166 | 0.4695886  | 0.968 | 0.811 | 3.52E-162 | B cells | mt-Nd4l |
| 5.90E-166 | 0.47438507 | 0.989 | 0.977 | 8.35E-162 | B cells | Fau     |
| 3.89E-164 | -1.5077151 | 0.113 | 0.486 | 5.51E-160 | B cells | Itgb2   |
| 4.16E-163 | 1.28614407 | 0.467 | 0.181 | 5.89E-159 | B cells | Tcp11l2 |
| 1.41E-162 | 1.08966921 | 0.569 | 0.271 | 1.99E-158 | B cells | mt-Nd3  |

|           |            |       |       |           |         |          |
|-----------|------------|-------|-------|-----------|---------|----------|
| 3.77E-161 | -1.7834833 | 0.005 | 0.337 | 5.34E-157 | B cells | Il2rb    |
| 1.04E-160 | -2.6869356 | 0.011 | 0.345 | 1.47E-156 | B cells | Ccl3     |
| 1.85E-160 | 0.59223089 | 0.974 | 0.839 | 2.61E-156 | B cells | Rpl36    |
| 1.18E-159 | -1.3759673 | 0.006 | 0.335 | 1.68E-155 | B cells | Skap1    |
| 9.85E-159 | -1.5914895 | 0.007 | 0.336 | 1.39E-154 | B cells | Itk      |
| 2.11E-157 | 0.55669282 | 0.975 | 0.886 | 2.98E-153 | B cells | Rpl34    |
| 8.45E-157 | -1.2246969 | 0.004 | 0.328 | 1.20E-152 | B cells | Lcp2     |
| 1.83E-156 | 0.75843504 | 0.919 | 0.786 | 2.59E-152 | B cells | Ddx5     |
| 2.24E-155 | -2.1441738 | 0.039 | 0.379 | 3.18E-151 | B cells | Isg15    |
| 9.90E-155 | 0.87425408 | 0.43  | 0.14  | 1.40E-150 | B cells | Cd81     |
| 1.01E-153 | 1.11399752 | 0.335 | 0.093 | 1.42E-149 | B cells | Pxk      |
| 2.84E-153 | -3.0102453 | 0.013 | 0.335 | 4.02E-149 | B cells | Ccl6     |
| 5.21E-153 | 1.21103003 | 0.636 | 0.347 | 7.38E-149 | B cells | Cd69     |
| 1.07E-152 | -1.400829  | 0.04  | 0.379 | 1.51E-148 | B cells | Glrx     |
| 4.91E-152 | -2.4003117 | 0.011 | 0.329 | 6.95E-148 | B cells | Ier3     |
| 1.19E-151 | 0.92991214 | 0.598 | 0.274 | 1.68E-147 | B cells | Unc93b1  |
| 4.70E-151 | -1.4633361 | 0.006 | 0.322 | 6.65E-147 | B cells | Prkch    |
| 4.91E-151 | -1.602093  | 0.079 | 0.431 | 6.95E-147 | B cells | Itgb1    |
| 8.64E-151 | 1.49155045 | 0.27  | 0.057 | 1.22E-146 | B cells | Tsc22d1  |
| 2.32E-150 | -1.5233983 | 0.002 | 0.315 | 3.28E-146 | B cells | Cd28     |
| 4.45E-150 | 0.68192032 | 0.931 | 0.747 | 6.29E-146 | B cells | Rpl36a   |
| 5.91E-150 | -1.3112186 | 0.331 | 0.647 | 8.37E-146 | B cells | Psme2    |
| 8.58E-150 | -1.4326541 | 0.083 | 0.429 | 1.21E-145 | B cells | Efhd2    |
| 8.86E-150 | 0.55167723 | 0.977 | 0.925 | 1.25E-145 | B cells | Rpl18a   |
| 7.26E-149 | -1.4410211 | 0.103 | 0.459 | 1.03E-144 | B cells | Zyx      |
| 7.35E-149 | 0.91688532 | 0.575 | 0.253 | 1.04E-144 | B cells | Napsa    |
| 9.23E-149 | 0.9299618  | 0.211 | 0.03  | 1.31E-144 | B cells | Txndc16  |
| 3.05E-148 | 0.54887151 | 0.981 | 0.881 | 4.32E-144 | B cells | Rps7     |
| 3.34E-148 | 0.71074051 | 0.914 | 0.709 | 4.73E-144 | B cells | Rpl12    |
| 8.41E-148 | -1.5418371 | 0.034 | 0.36  | 1.19E-143 | B cells | Emb      |
| 8.96E-148 | 0.6395502  | 0.132 | 0.004 | 1.27E-143 | B cells | Bcar3    |
| 4.77E-147 | -1.4077404 | 0.239 | 0.57  | 6.75E-143 | B cells | Atox1    |
| 9.58E-147 | 0.81457864 | 0.141 | 0.006 | 1.36E-142 | B cells | B3gnt7   |
| 1.00E-145 | -1.3385844 | 0.55  | 0.754 | 1.42E-141 | B cells | H2afz    |
| 1.84E-144 | 1.01233762 | 0.545 | 0.252 | 2.61E-140 | B cells | Cxcr4    |
| 2.25E-144 | 1.18823335 | 0.323 | 0.091 | 3.18E-140 | B cells | Rasgef1b |
| 1.66E-143 | -2.5117145 | 0.005 | 0.308 | 2.35E-139 | B cells | Gzmb     |
| 3.54E-143 | -4.1246306 | 0.034 | 0.343 | 5.01E-139 | B cells | Il1b     |
| 1.98E-141 | -1.4307884 | 0.003 | 0.301 | 2.81E-137 | B cells | Cd27     |
| 3.64E-141 | 1.08404088 | 0.286 | 0.07  | 5.15E-137 | B cells | Eif2ak3  |
| 4.07E-141 | 0.51412729 | 0.981 | 0.933 | 5.76E-137 | B cells | Uba52    |
| 5.33E-141 | 0.68070307 | 0.909 | 0.73  | 7.54E-137 | B cells | Eef2     |
| 6.26E-141 | 1.10580057 | 0.442 | 0.179 | 8.86E-137 | B cells | Add3     |
| 1.13E-140 | -1.7091484 | 0.009 | 0.308 | 1.60E-136 | B cells | Lilr4b   |
| 2.03E-140 | 1.05945329 | 0.676 | 0.433 | 2.87E-136 | B cells | Ezr      |
| 3.36E-140 | 0.59705923 | 0.984 | 0.954 | 4.75E-136 | B cells | H3f3b    |
| 4.39E-140 | -1.2009855 | 0.397 | 0.681 | 6.22E-136 | B cells | Ldha     |
| 9.10E-140 | 1.12465517 | 0.358 | 0.121 | 1.29E-135 | B cells | Snx9     |

|           |            |       |       |           |         |          |
|-----------|------------|-------|-------|-----------|---------|----------|
| 1.03E-139 | 1.08950459 | 0.337 | 0.104 | 1.46E-135 | B cells | Man1a    |
| 1.29E-139 | -1.3290296 | 0.064 | 0.398 | 1.82E-135 | B cells | Fosl2    |
| 3.71E-138 | 0.46008159 | 0.981 | 0.93  | 5.26E-134 | B cells | Rps16    |
| 5.47E-137 | -1.9187937 | 0.027 | 0.328 | 7.74E-133 | B cells | Lst1     |
| 1.91E-136 | -0.8501977 | 0.898 | 0.953 | 2.71E-132 | B cells | Actg1    |
| 5.34E-136 | 0.8249218  | 0.617 | 0.295 | 7.56E-132 | B cells | H2-DMA   |
| 1.13E-135 | -1.3844621 | 0.004 | 0.292 | 1.60E-131 | B cells | Tnfrsf1a |
| 9.38E-135 | -1.9771657 | 0.012 | 0.304 | 1.33E-130 | B cells | Ctla4    |
| 3.67E-134 | -1.6910922 | 0.007 | 0.294 | 5.19E-130 | B cells | Fcgr3    |
| 7.45E-134 | -1.7876825 | 0.003 | 0.287 | 1.06E-129 | B cells | Lag3     |
| 1.63E-133 | -1.4734202 | 0.027 | 0.324 | 2.30E-129 | B cells | Tnfrsf18 |
| 6.98E-133 | -1.8694633 | 0.137 | 0.46  | 9.89E-129 | B cells | Pglyrp1  |
| 8.11E-133 | -1.1512972 | 0.116 | 0.456 | 1.15E-128 | B cells | Leprotl1 |
| 9.81E-133 | 0.9378029  | 0.223 | 0.042 | 1.39E-128 | B cells | Zfp318   |
| 2.86E-132 | 0.70413435 | 0.177 | 0.022 | 4.05E-128 | B cells | Aff3     |
| 9.46E-132 | 0.48792223 | 0.98  | 0.904 | 1.34E-127 | B cells | Rpl30    |
| 2.49E-131 | -1.1681608 | 0.144 | 0.48  | 3.53E-127 | B cells | S100a13  |
| 2.62E-131 | -1.0256917 | 0.581 | 0.764 | 3.70E-127 | B cells | Clic1    |
| 3.65E-131 | 0.94541951 | 0.209 | 0.036 | 5.17E-127 | B cells | Pgap1    |
| 8.93E-131 | -1.2216639 | 0.005 | 0.287 | 1.26E-126 | B cells | Cd247    |
| 1.01E-130 | -1.6025051 | 0.239 | 0.556 | 1.43E-126 | B cells | Prdx5    |
| 2.01E-130 | -1.4513633 | 0.056 | 0.363 | 2.84E-126 | B cells | Bcl2a1d  |
| 1.38E-128 | 0.93099896 | 0.265 | 0.066 | 1.96E-124 | B cells | Cnn3     |
| 2.00E-128 | 0.90501607 | 0.23  | 0.046 | 2.83E-124 | B cells | Mtss1    |
| 4.62E-128 | 0.83559048 | 0.138 | 0.01  | 6.54E-124 | B cells | Dennd5b  |
| 2.14E-127 | -1.4532751 | 0.013 | 0.294 | 3.03E-123 | B cells | Cd68     |
| 4.30E-127 | -1.7104738 | 0.003 | 0.275 | 6.08E-123 | B cells | Cxcr6    |
| 6.68E-127 | -2.3543707 | 0.096 | 0.402 | 9.46E-123 | B cells | Msrb1    |
| 6.98E-127 | 0.89360603 | 0.268 | 0.067 | 9.88E-123 | B cells | Cfap43   |
| 7.53E-127 | 0.87751862 | 0.245 | 0.054 | 1.07E-122 | B cells | Cmah     |
| 6.93E-126 | 0.47097984 | 0.985 | 0.928 | 9.81E-122 | B cells | Rps8     |
| 1.04E-124 | -1.4521452 | 0.173 | 0.5   | 1.47E-120 | B cells | Nr4a2    |
| 1.61E-124 | 0.78804337 | 0.792 | 0.587 | 2.28E-120 | B cells | Cnbp     |
| 2.26E-124 | 0.53940358 | 0.971 | 0.857 | 3.20E-120 | B cells | Rpl13a   |
| 2.30E-124 | -1.0768849 | 0.456 | 0.701 | 3.25E-120 | B cells | Myl12a   |
| 9.17E-124 | 0.82985975 | 0.22  | 0.044 | 1.30E-119 | B cells | Cyb561a3 |
| 2.34E-123 | 0.98889282 | 0.467 | 0.209 | 3.31E-119 | B cells | Rasgrp2  |
| 9.10E-123 | 0.48172359 | 0.973 | 0.898 | 1.29E-118 | B cells | Rps10    |
| 1.08E-122 | -0.706038  | 0.863 | 0.898 | 1.52E-118 | B cells | Cfl1     |
| 3.10E-122 | -1.400024  | 0.123 | 0.436 | 4.39E-118 | B cells | Bcl2a1b  |
| 1.00E-121 | 0.48467    | 0.983 | 0.925 | 1.42E-117 | B cells | Rpl13    |
| 1.16E-121 | -1.3600591 | 0.25  | 0.572 | 1.64E-117 | B cells | Ifngr1   |
| 4.12E-121 | -1.0708796 | 0.009 | 0.276 | 5.84E-117 | B cells | Rgs10    |
| 5.01E-121 | 1.10811373 | 0.483 | 0.246 | 7.09E-117 | B cells | Tmod3    |
| 5.04E-121 | 0.44405073 | 0.977 | 0.926 | 7.14E-117 | B cells | Rpl23    |
| 5.06E-121 | -1.3701648 | 0.159 | 0.485 | 7.16E-117 | B cells | Ahnak    |
| 1.87E-120 | 0.91679207 | 0.211 | 0.041 | 2.65E-116 | B cells | Trem12   |
| 2.53E-120 | 0.49323829 | 0.971 | 0.878 | 3.59E-116 | B cells | Rps26    |

|           |            |       |       |           |         |             |
|-----------|------------|-------|-------|-----------|---------|-------------|
| 4.29E-120 | 0.84693382 | 0.554 | 0.276 | 6.08E-116 | B cells | Lyn         |
| 2.10E-119 | 0.53548527 | 0.957 | 0.821 | 2.97E-115 | B cells | Rpl26       |
| 2.22E-119 | -1.7446942 | 0.002 | 0.262 | 3.14E-115 | B cells | Ctla2a      |
| 3.26E-119 | 0.44309909 | 0.936 | 0.789 | 4.61E-115 | B cells | mt-Nd2      |
| 1.12E-118 | 0.45287657 | 0.977 | 0.915 | 1.59E-114 | B cells | Rpl37       |
| 2.52E-118 | 1.04276893 | 0.294 | 0.091 | 3.57E-114 | B cells | Chchd10     |
| 3.40E-118 | 0.74147746 | 0.159 | 0.02  | 4.81E-114 | B cells | Tmem108     |
| 7.20E-117 | 0.48115808 | 0.978 | 0.879 | 1.02E-112 | B cells | Rpl8        |
| 1.36E-116 | -1.8870822 | 0.006 | 0.263 | 1.93E-112 | B cells | Tgfb1       |
| 1.39E-116 | -1.7174134 | 0.022 | 0.286 | 1.96E-112 | B cells | Ms4a6c      |
| 1.93E-116 | 0.77968471 | 0.183 | 0.03  | 2.73E-112 | B cells | Lrrk2       |
| 2.56E-116 | 0.8955159  | 0.233 | 0.056 | 3.62E-112 | B cells | Btk         |
| 2.16E-115 | 0.76582461 | 0.176 | 0.028 | 3.06E-111 | B cells | A530040E14I |
| 8.17E-115 | 0.91292919 | 0.379 | 0.147 | 1.16E-110 | B cells | Aldh2       |
| 3.86E-114 | 1.02270464 | 0.368 | 0.148 | 5.47E-110 | B cells | Abhd17b     |
| 4.46E-114 | -1.2658789 | 0.448 | 0.696 | 6.31E-110 | B cells | Vim         |
| 2.18E-113 | 1.06571323 | 0.406 | 0.175 | 3.09E-109 | B cells | Stap1       |
| 3.48E-113 | 0.50426552 | 0.977 | 0.861 | 4.93E-109 | B cells | Ptma        |
| 4.50E-113 | 0.4249367  | 0.98  | 0.939 | 6.37E-109 | B cells | Gm10076     |
| 6.82E-113 | 0.60278245 | 0.113 | 0.006 | 9.65E-109 | B cells | Rasgrp3     |
| 1.50E-112 | 0.99355267 | 0.26  | 0.071 | 2.12E-108 | B cells | Irs2        |
| 2.37E-112 | 0.57963344 | 0.111 | 0.006 | 3.35E-108 | B cells | Trim7       |
| 5.25E-112 | 0.57571381 | 0.112 | 0.006 | 7.44E-108 | B cells | Pxdc1       |
| 1.56E-111 | -0.9354908 | 0.412 | 0.664 | 2.20E-107 | B cells | Arf5        |
| 4.10E-111 | 0.98722287 | 0.354 | 0.136 | 5.80E-107 | B cells | Dgkd        |
| 9.37E-111 | -0.8326043 | 0.651 | 0.801 | 1.33E-106 | B cells | Myl12b      |
| 4.74E-110 | 1.06592806 | 0.342 | 0.131 | 6.71E-106 | B cells | Stt3b       |
| 3.19E-108 | -1.0018677 | 0.011 | 0.255 | 4.51E-104 | B cells | Acot7       |
| 6.97E-108 | -1.8275431 | 0.005 | 0.244 | 9.87E-104 | B cells | Ifng        |
| 7.31E-108 | 0.7885094  | 0.224 | 0.054 | 1.04E-103 | B cells | Wdfy4       |
| 1.16E-107 | 0.93807038 | 0.478 | 0.235 | 1.65E-103 | B cells | Rhob        |
| 1.79E-107 | -0.7480515 | 0.904 | 0.92  | 2.53E-103 | B cells | Cd52        |
| 3.31E-107 | -0.9952472 | 0.035 | 0.297 | 4.69E-103 | B cells | Vsir        |
| 3.83E-107 | -1.216059  | 0.001 | 0.236 | 5.42E-103 | B cells | Tox         |
| 7.51E-107 | 0.74787137 | 0.652 | 0.404 | 1.06E-102 | B cells | Ier5        |
| 1.90E-106 | -3.3251916 | 0.016 | 0.257 | 2.69E-102 | B cells | C1qb        |
| 9.52E-106 | 1.34801615 | 0.308 | 0.107 | 1.35E-101 | B cells | Plk2        |
| 9.76E-106 | 0.98984805 | 0.659 | 0.46  | 1.38E-101 | B cells | Fam107b     |
| 2.18E-105 | -1.1899501 | 0.367 | 0.628 | 3.09E-101 | B cells | H2-Q7       |
| 2.47E-105 | 0.823983   | 0.214 | 0.05  | 3.50E-101 | B cells | Ttpal       |
| 2.89E-105 | 1.0243354  | 0.471 | 0.248 | 4.09E-101 | B cells | 4930523C07F |
| 5.47E-105 | 0.64483797 | 0.134 | 0.015 | 7.74E-101 | B cells | Sbk1        |
| 2.47E-104 | -0.9967439 | 0.582 | 0.729 | 3.50E-100 | B cells | Psmb8       |
| 8.07E-104 | 1.00211271 | 0.358 | 0.151 | 1.14E-99  | B cells | Cnp         |
| 1.03E-103 | -2.0700332 | 0.023 | 0.266 | 1.45E-99  | B cells | Ly6c2       |
| 1.06E-103 | 1.06169603 | 0.784 | 0.605 | 1.50E-99  | B cells | Hspe1       |
| 3.43E-103 | -1.4509931 | 0.059 | 0.321 | 4.85E-99  | B cells | Cdkn1a      |
| 5.37E-103 | -1.9572212 | 0.009 | 0.243 | 7.60E-99  | B cells | Cd14        |



|           |            |       |       |          |         |         |
|-----------|------------|-------|-------|----------|---------|---------|
| 8.95E-103 | 1.00314119 | 0.48  | 0.247 | 1.27E-98 | B cells | Gm8369  |
| 1.58E-102 | 0.46559787 | 0.978 | 0.885 | 2.23E-98 | B cells | Rps5    |
| 1.84E-102 | -1.2511735 | 0.127 | 0.408 | 2.60E-98 | B cells | Tpi1    |
| 6.62E-102 | 0.99606926 | 0.429 | 0.216 | 9.38E-98 | B cells | Ppp3ca  |
| 4.77E-101 | -0.9459519 | 0.185 | 0.495 | 6.76E-97 | B cells | Arl6ip5 |
| 5.48E-101 | -3.8543106 | 0.014 | 0.245 | 7.76E-97 | B cells | Gzma    |
| 1.14E-100 | 0.7322388  | 0.612 | 0.351 | 1.61E-96 | B cells | Gimap6  |
| 1.28E-100 | 1.08573269 | 0.558 | 0.364 | 1.81E-96 | B cells | Bri3    |
| 1.75E-100 | -2.9223947 | 0.006 | 0.232 | 2.48E-96 | B cells | C1qa    |
| 3.65E-100 | -1.3915429 | 0.005 | 0.231 | 5.17E-96 | B cells | Csf1r   |
| 4.01E-100 | -1.5055855 | 0.005 | 0.229 | 5.68E-96 | B cells | Pla2g7  |
| 4.82E-100 | -1.5942348 | 0.004 | 0.228 | 6.82E-96 | B cells | Cd7     |
| 5.00E-100 | -0.9406749 | 0.083 | 0.361 | 7.08E-96 | B cells | Pycard  |
| 7.28E-100 | 0.803505   | 0.651 | 0.425 | 1.03E-95 | B cells | Pde4b   |
| 1.53E-99  | -0.9954105 | 0.019 | 0.255 | 2.16E-95 | B cells | Spn     |
| 2.03E-99  | 0.99321653 | 0.434 | 0.225 | 2.88E-95 | B cells | Mif4gd  |
| 3.13E-99  | -0.9517885 | 0.014 | 0.245 | 4.43E-95 | B cells | Rinl    |
| 3.42E-99  | -1.2722106 | 0.024 | 0.262 | 4.84E-95 | B cells | Plin2   |
| 5.01E-99  | -1.8584708 | 0.018 | 0.249 | 7.09E-95 | B cells | Mt1     |
| 5.82E-99  | -0.8915106 | 0.041 | 0.293 | 8.23E-95 | B cells | 9-Sep   |
| 9.74E-99  | 0.84071454 | 0.229 | 0.061 | 1.38E-94 | B cells | Xylt1   |
| 1.32E-98  | -1.478277  | 0.096 | 0.369 | 1.87E-94 | B cells | Grina   |
| 1.80E-98  | -1.0079732 | 0.237 | 0.524 | 2.55E-94 | B cells | Vamp8   |
| 5.02E-98  | 0.9172397  | 0.296 | 0.109 | 7.11E-94 | B cells | Tmem243 |
| 5.61E-98  | -1.1009504 | 0.193 | 0.49  | 7.94E-94 | B cells | Mrpl33  |
| 8.78E-98  | -1.5003678 | 0.005 | 0.225 | 1.24E-93 | B cells | Prf1    |
| 1.12E-97  | -1.0484653 | 0.065 | 0.325 | 1.59E-93 | B cells | Ptpn22  |
| 1.67E-97  | -0.9635313 | 0.037 | 0.282 | 2.37E-93 | B cells | Glipr1  |
| 2.77E-97  | -0.9798525 | 0.002 | 0.22  | 3.92E-93 | B cells | Nrp1    |
| 3.02E-97  | -2.7558859 | 0.005 | 0.225 | 4.28E-93 | B cells | C1qc    |
| 4.79E-97  | -0.9540023 | 0.002 | 0.219 | 6.79E-93 | B cells | Zap70   |
| 9.81E-97  | 0.96729519 | 0.283 | 0.1   | 1.39E-92 | B cells | Parp1   |
| 1.02E-96  | -0.8644279 | 0.726 | 0.819 | 1.45E-92 | B cells | Rac2    |
| 1.27E-96  | -1.0004492 | 0.046 | 0.294 | 1.80E-92 | B cells | Nfil3   |
| 1.63E-96  | -0.8453779 | 0.021 | 0.253 | 2.31E-92 | B cells | Itm2c   |
| 5.70E-96  | 0.50952193 | 0.953 | 0.782 | 8.07E-92 | B cells | Rpl22   |
| 7.89E-96  | -1.0752021 | 0.09  | 0.355 | 1.12E-91 | B cells | Anxa5   |
| 1.19E-95  | -0.8521096 | 0.756 | 0.818 | 1.69E-91 | B cells | Cyba    |
| 1.24E-95  | 0.90553685 | 0.322 | 0.129 | 1.76E-91 | B cells | Vars    |
| 2.68E-95  | 1.0054382  | 0.362 | 0.158 | 3.80E-91 | B cells | Foxo1   |
| 4.51E-95  | -0.876916  | 0.016 | 0.243 | 6.38E-91 | B cells | Myo1f   |
| 1.05E-94  | -1.2754965 | 0.002 | 0.215 | 1.49E-90 | B cells | Tnfrsf9 |
| 1.19E-94  | 0.56591759 | 0.124 | 0.014 | 1.69E-90 | B cells | Kmo     |
| 1.42E-94  | 0.85910466 | 0.583 | 0.388 | 2.01E-90 | B cells | Arf6    |
| 1.50E-94  | 0.61453508 | 0.827 | 0.656 | 2.12E-90 | B cells | Rpl4    |
| 1.76E-94  | -0.9804491 | 0.006 | 0.222 | 2.50E-90 | B cells | Lrrc25  |
| 2.13E-94  | 1.61024098 | 0.66  | 0.491 | 3.01E-90 | B cells | Dnajb1  |
| 2.44E-94  | -1.1067232 | 0.344 | 0.6   | 3.45E-90 | B cells | Prr13   |

|          |            |       |       |          |         |          |
|----------|------------|-------|-------|----------|---------|----------|
| 2.98E-94 | 0.87816688 | 0.263 | 0.086 | 4.22E-90 | B cells | Tcf4     |
| 6.90E-94 | -0.9490043 | 0.099 | 0.369 | 9.77E-90 | B cells | Cyth4    |
| 1.13E-93 | 1.2605653  | 0.519 | 0.313 | 1.61E-89 | B cells | Hsph1    |
| 2.12E-93 | 0.65145009 | 0.141 | 0.021 | 2.99E-89 | B cells | Slc9a7   |
| 2.24E-93 | 0.88392702 | 0.467 | 0.251 | 3.16E-89 | B cells | Rbm38    |
| 3.88E-93 | -1.4101582 | 0.006 | 0.218 | 5.49E-89 | B cells | Slc16a3  |
| 4.98E-93 | 0.41818382 | 0.984 | 0.913 | 7.05E-89 | B cells | Rps3a1   |
| 6.89E-93 | 0.80327166 | 0.625 | 0.424 | 9.75E-89 | B cells | Gdi2     |
| 2.28E-92 | 0.45306441 | 0.97  | 0.856 | 3.23E-88 | B cells | Rpl28    |
| 3.26E-92 | -0.7458429 | 0.025 | 0.253 | 4.61E-88 | B cells | Hpcal1   |
| 7.24E-92 | -0.9292659 | 0.054 | 0.3   | 1.02E-87 | B cells | Zbp1     |
| 2.78E-91 | 0.47644358 | 0.831 | 0.651 | 3.93E-87 | B cells | mt-Nd5   |
| 4.67E-91 | 0.95899483 | 0.916 | 0.86  | 6.62E-87 | B cells | Hspa8    |
| 9.38E-91 | -0.8871887 | 0.184 | 0.472 | 1.33E-86 | B cells | Rnaset2b |
| 1.30E-90 | -0.8530838 | 0.058 | 0.305 | 1.85E-86 | B cells | Arrb2    |
| 5.79E-90 | -1.2324608 | 0.007 | 0.214 | 8.20E-86 | B cells | Aif1     |
| 1.43E-89 | -0.8387772 | 0.08  | 0.338 | 2.03E-85 | B cells | Dnajc15  |
| 3.68E-89 | -1.3698242 | 0.01  | 0.218 | 5.21E-85 | B cells | Gsr      |
| 5.45E-89 | 0.77165559 | 0.718 | 0.524 | 7.72E-85 | B cells | Cytip    |
| 6.43E-89 | -0.9088805 | 0.291 | 0.565 | 9.10E-85 | B cells | Abrac1   |
| 6.96E-89 | -0.8128836 | 0.459 | 0.677 | 9.85E-85 | B cells | Capzb    |
| 2.59E-88 | 0.93233955 | 0.369 | 0.169 | 3.67E-84 | B cells | Trim25   |
| 2.97E-88 | -1.0805877 | 0.005 | 0.206 | 4.21E-84 | B cells | Klrk1    |
| 6.46E-88 | -1.2794258 | 0.005 | 0.206 | 9.14E-84 | B cells | Fcgr4    |
| 1.48E-87 | 0.82174371 | 0.197 | 0.051 | 2.09E-83 | B cells | Snx30    |
| 2.43E-87 | -0.9491847 | 0.373 | 0.619 | 3.44E-83 | B cells | Emp3     |
| 6.39E-87 | -3.4139559 | 0.022 | 0.231 | 9.04E-83 | B cells | Cxcl2    |
| 7.44E-87 | 0.48066289 | 0.936 | 0.806 | 1.05E-82 | B cells | Rpl7     |
| 2.50E-86 | -0.8496376 | 0.014 | 0.22  | 3.54E-82 | B cells | Lgals3bp |
| 2.68E-86 | -1.0881858 | 0.341 | 0.592 | 3.79E-82 | B cells | Pkm      |
| 3.73E-86 | -2.0971941 | 0.007 | 0.206 | 5.28E-82 | B cells | Hp       |
| 5.32E-86 | -0.9220915 | 0.068 | 0.308 | 7.53E-82 | B cells | Zgpat    |
| 8.13E-86 | -1.5257741 | 0.006 | 0.204 | 1.15E-81 | B cells | Mafb     |
| 2.36E-85 | 1.20872688 | 0.201 | 0.055 | 3.34E-81 | B cells | Myc      |
| 5.57E-85 | -1.1710232 | 0.102 | 0.352 | 7.89E-81 | B cells | Cd44     |
| 6.94E-85 | 0.5722253  | 0.115 | 0.014 | 9.82E-81 | B cells | Zbtb10   |
| 7.33E-85 | -0.815434  | 0.007 | 0.205 | 1.04E-80 | B cells | Metrnl   |
| 1.30E-84 | -0.8882866 | 0.003 | 0.196 | 1.84E-80 | B cells | Havcr2   |
| 2.13E-84 | 0.9992314  | 0.394 | 0.205 | 3.01E-80 | B cells | Sp140    |
| 2.87E-84 | -1.0089214 | 0.006 | 0.201 | 4.07E-80 | B cells | App      |
| 4.05E-84 | 0.60573148 | 0.792 | 0.633 | 5.73E-80 | B cells | Ywhaz    |
| 4.31E-84 | -0.6623933 | 0.698 | 0.795 | 6.10E-80 | B cells | Arpc2    |
| 1.12E-83 | 0.83415185 | 0.294 | 0.115 | 1.59E-79 | B cells | Atp2a3   |
| 1.39E-83 | 0.40835449 | 0.972 | 0.868 | 1.97E-79 | B cells | Rpl32    |
| 1.72E-83 | 0.94787611 | 0.421 | 0.229 | 2.43E-79 | B cells | Tmem123  |
| 8.33E-83 | -0.8621844 | 0.377 | 0.627 | 1.18E-78 | B cells | Tmem50a  |
| 1.57E-82 | -1.0080821 | 0.006 | 0.198 | 2.23E-78 | B cells | Ckb      |
| 1.58E-82 | -0.9375629 | 0.554 | 0.703 | 2.24E-78 | B cells | Aldoa    |

|          |            |       |       |          |         |             |
|----------|------------|-------|-------|----------|---------|-------------|
| 1.58E-82 | -1.5905003 | 0.008 | 0.202 | 2.24E-78 | B cells | Tnfrsf4     |
| 2.42E-82 | 0.5675332  | 0.128 | 0.02  | 3.42E-78 | B cells | Cnr2        |
| 2.66E-82 | -1.1531858 | 0.02  | 0.222 | 3.76E-78 | B cells | Mpeg1       |
| 2.02E-81 | -0.9055107 | 0.348 | 0.588 | 2.85E-77 | B cells | Preli1      |
| 2.91E-81 | -0.8675892 | 0.065 | 0.296 | 4.12E-77 | B cells | Batf        |
| 3.59E-81 | -0.9606648 | 0.03  | 0.237 | 5.09E-77 | B cells | Csf2ra      |
| 5.79E-81 | 0.92312283 | 0.379 | 0.19  | 8.20E-77 | B cells | Camk2d      |
| 5.99E-81 | -0.8246263 | 0.181 | 0.449 | 8.48E-77 | B cells | Tmem14c     |
| 1.34E-80 | -0.9265051 | 0.003 | 0.188 | 1.90E-76 | B cells | Clec4a3     |
| 1.44E-80 | 0.40375256 | 0.981 | 0.891 | 2.04E-76 | B cells | Rpl6        |
| 1.46E-80 | -0.8116353 | 0.172 | 0.444 | 2.07E-76 | B cells | Chmp4b      |
| 1.68E-80 | -0.8508492 | 0.054 | 0.278 | 2.38E-76 | B cells | D16Ertd472e |
| 3.75E-80 | -0.8261813 | 0.53  | 0.699 | 5.31E-76 | B cells | Psme1       |
| 5.86E-80 | -2.0420793 | 0.451 | 0.606 | 8.30E-76 | B cells | Cst3        |
| 1.06E-79 | -0.7597741 | 0.09  | 0.332 | 1.50E-75 | B cells | Tmem256     |
| 1.12E-79 | -0.9540462 | 0.005 | 0.191 | 1.58E-75 | B cells | Cd5         |
| 1.44E-79 | -0.8411587 | 0.072 | 0.304 | 2.04E-75 | B cells | Prex1       |
| 3.46E-79 | -0.7954893 | 0.004 | 0.188 | 4.90E-75 | B cells | Ramp1       |
| 3.90E-79 | 0.71644042 | 0.192 | 0.054 | 5.52E-75 | B cells | Tnfrsf13b   |
| 4.16E-79 | 0.60644323 | 0.728 | 0.541 | 5.89E-75 | B cells | Pcbp2       |
| 5.41E-79 | -0.9248403 | 0.039 | 0.249 | 7.65E-75 | B cells | Rbpj        |
| 6.93E-79 | 0.87833403 | 0.391 | 0.202 | 9.81E-75 | B cells | Cyth1       |
| 7.40E-79 | -1.3471126 | 0.012 | 0.202 | 1.05E-74 | B cells | Ccrl2       |
| 8.05E-79 | 0.68941995 | 0.663 | 0.485 | 1.14E-74 | B cells | Hnrnpf      |
| 1.45E-78 | 0.60020641 | 0.125 | 0.02  | 2.06E-74 | B cells | Cxxc5       |
| 1.54E-78 | -0.7855587 | 0.001 | 0.181 | 2.19E-74 | B cells | Sh2d1a      |
| 1.70E-78 | -1.0163173 | 0.09  | 0.324 | 2.41E-74 | B cells | Itgal       |
| 7.92E-78 | 0.86165461 | 0.447 | 0.254 | 1.12E-73 | B cells | Tgif1       |
| 2.38E-77 | -1.965612  | 0.004 | 0.182 | 3.37E-73 | B cells | Cxcl9       |
| 8.64E-77 | -0.448119  | 0.98  | 0.972 | 1.22E-72 | B cells | Ubb         |
| 9.89E-77 | 0.36518696 | 0.981 | 0.903 | 1.40E-72 | B cells | Rpl19       |
| 1.10E-76 | 0.89408844 | 0.279 | 0.115 | 1.56E-72 | B cells | Tcf3        |
| 1.19E-76 | 0.54730597 | 0.847 | 0.704 | 1.69E-72 | B cells | Rps15       |
| 1.97E-76 | 0.48369906 | 0.943 | 0.833 | 2.78E-72 | B cells | Rps12       |
| 2.08E-76 | -0.7723529 | 0.018 | 0.207 | 2.95E-72 | B cells | Ubash3b     |
| 3.21E-76 | 0.78732796 | 0.221 | 0.073 | 4.54E-72 | B cells | Cdt1        |
| 5.08E-76 | 0.7923079  | 0.464 | 0.273 | 7.19E-72 | B cells | Eif4a2      |
| 5.24E-76 | -0.9553777 | 0.261 | 0.528 | 7.42E-72 | B cells | Tln1        |
| 5.29E-76 | 0.8650706  | 0.39  | 0.206 | 7.49E-72 | B cells | Rabgap1l    |
| 5.51E-76 | -0.8609154 | 0.358 | 0.595 | 7.80E-72 | B cells | Ostf1       |
| 7.40E-76 | -0.8337388 | 0.052 | 0.265 | 1.05E-71 | B cells | Ifi47       |
| 9.48E-76 | 0.38033978 | 0.966 | 0.927 | 1.34E-71 | B cells | Rps9        |
| 1.22E-75 | -0.8813839 | 0.109 | 0.348 | 1.73E-71 | B cells | Card19      |
| 2.10E-75 | -0.837465  | 0.006 | 0.183 | 2.98E-71 | B cells | Lair1       |
| 2.16E-75 | -0.9053462 | 0.005 | 0.181 | 3.06E-71 | B cells | Ccr2        |
| 3.93E-75 | -0.8563749 | 0.018 | 0.205 | 5.57E-71 | B cells | Entpd1      |
| 4.47E-75 | -1.7921267 | 0.005 | 0.18  | 6.33E-71 | B cells | Tnfaip2     |
| 1.52E-74 | -0.7006779 | 0.011 | 0.191 | 2.16E-70 | B cells | Arl4c       |

|          |            |       |       |          |         |          |
|----------|------------|-------|-------|----------|---------|----------|
| 2.16E-74 | 0.5129694  | 0.485 | 0.253 | 3.06E-70 | B cells | Ly86     |
| 2.45E-74 | 0.38731296 | 0.977 | 0.891 | 3.47E-70 | B cells | Rps4x    |
| 2.67E-74 | 0.50300806 | 0.867 | 0.721 | 3.78E-70 | B cells | Rpl9     |
| 3.03E-74 | -1.1526832 | 0.003 | 0.175 | 4.29E-70 | B cells | Adam8    |
| 5.11E-74 | -0.9146472 | 0.002 | 0.174 | 7.23E-70 | B cells | Fasl     |
| 6.44E-74 | 0.84666292 | 0.461 | 0.287 | 9.11E-70 | B cells | Pdpf     |
| 1.32E-73 | -0.8458262 | 0.006 | 0.179 | 1.87E-69 | B cells | Sirpa    |
| 2.26E-73 | -0.8571526 | 0.003 | 0.174 | 3.20E-69 | B cells | Ms4a6d   |
| 4.83E-73 | 0.75241506 | 0.316 | 0.134 | 6.84E-69 | B cells | Id3      |
| 7.90E-73 | 0.77855926 | 0.292 | 0.125 | 1.12E-68 | B cells | Plcg2    |
| 9.21E-73 | -0.8374885 | 0.005 | 0.177 | 1.30E-68 | B cells | Sifn1    |
| 1.43E-72 | -1.285031  | 0.04  | 0.234 | 2.03E-68 | B cells | Cd9      |
| 1.65E-72 | -0.8021103 | 0.251 | 0.512 | 2.34E-68 | B cells | Prdx6    |
| 1.70E-72 | -1.123436  | 0.004 | 0.173 | 2.41E-68 | B cells | Tgm2     |
| 1.86E-72 | 0.73442841 | 0.831 | 0.694 | 2.63E-68 | B cells | Hsp90aa1 |
| 2.82E-72 | -0.9671265 | 0.148 | 0.388 | 4.00E-68 | B cells | Bst2     |
| 3.57E-72 | -0.8133819 | 0.207 | 0.46  | 5.06E-68 | B cells | Akr1a1   |
| 3.65E-72 | 1.06321719 | 0.347 | 0.172 | 5.17E-68 | B cells | Gpr171   |
| 7.73E-72 | -0.7530092 | 0.075 | 0.295 | 1.09E-67 | B cells | Runx3    |
| 2.10E-71 | -0.8588912 | 0.007 | 0.177 | 2.97E-67 | B cells | Cd300a   |
| 4.83E-71 | -1.3396999 | 0.061 | 0.261 | 6.84E-67 | B cells | Grn      |
| 6.96E-71 | -0.7885222 | 0.133 | 0.37  | 9.85E-67 | B cells | Ech1     |
| 1.11E-70 | -0.7914691 | 0.415 | 0.631 | 1.56E-66 | B cells | Ndufa13  |
| 2.02E-70 | -0.9099335 | 0.003 | 0.167 | 2.86E-66 | B cells | Izumo1r  |
| 2.17E-70 | -0.7904048 | 0.002 | 0.165 | 3.07E-66 | B cells | Cd6      |
| 2.18E-70 | 0.84148423 | 0.354 | 0.178 | 3.09E-66 | B cells | Birc3    |
| 4.45E-70 | -0.6583537 | 0.004 | 0.168 | 6.30E-66 | B cells | Sema4a   |
| 5.24E-70 | -0.7368879 | 0.004 | 0.169 | 7.41E-66 | B cells | Xdh      |
| 8.53E-70 | -1.0619961 | 0     | 0.16  | 1.21E-65 | B cells | Gzmk     |
| 2.97E-69 | -0.7822792 | 0.671 | 0.767 | 4.20E-65 | B cells | Ucp2     |
| 3.93E-69 | 0.70594238 | 0.215 | 0.074 | 5.56E-65 | B cells | Brwd1    |
| 4.90E-69 | 0.83493283 | 0.237 | 0.089 | 6.94E-65 | B cells | Traf4    |
| 7.67E-69 | 0.68513749 | 0.187 | 0.058 | 1.09E-64 | B cells | Lpcat1   |
| 9.23E-69 | -0.6487998 | 0.002 | 0.163 | 1.31E-64 | B cells | Klk8     |
| 1.28E-68 | -0.6521695 | 0.017 | 0.191 | 1.82E-64 | B cells | Fam89b   |
| 1.48E-68 | -1.4643505 | 0.004 | 0.166 | 2.09E-64 | B cells | Clec4e   |
| 1.88E-68 | -0.7735067 | 0.054 | 0.255 | 2.66E-64 | B cells | Creg1    |
| 2.31E-68 | -0.8479651 | 0.003 | 0.163 | 3.27E-64 | B cells | Sirpb1c  |
| 3.21E-68 | 0.53377656 | 0.103 | 0.015 | 4.55E-64 | B cells | Prr5     |
| 4.79E-68 | -1.0166823 | 0.04  | 0.224 | 6.78E-64 | B cells | Plbd1    |
| 5.69E-68 | -0.7435326 | 0.128 | 0.361 | 8.06E-64 | B cells | Lamtor4  |
| 6.60E-68 | -0.837056  | 0.933 | 0.924 | 9.35E-64 | B cells | Srgn     |
| 1.15E-67 | 0.62709793 | 0.16  | 0.042 | 1.62E-63 | B cells | Pecam1   |
| 1.39E-67 | -0.8262889 | 0.205 | 0.445 | 1.96E-63 | B cells | Psmb10   |
| 1.87E-67 | -0.9359374 | 0.005 | 0.166 | 2.64E-63 | B cells | Cxcl16   |
| 1.90E-67 | -0.8730117 | 0.095 | 0.312 | 2.69E-63 | B cells | Socs1    |
| 2.28E-67 | -0.5835784 | 0.836 | 0.848 | 3.23E-63 | B cells | Sh3bgrl3 |
| 3.27E-67 | 0.55639835 | 0.125 | 0.025 | 4.63E-63 | B cells | Rubcn    |

|          |            |       |       |          |         |           |
|----------|------------|-------|-------|----------|---------|-----------|
| 3.96E-67 | -1.0836681 | 0.024 | 0.198 | 5.61E-63 | B cells | Gbp2      |
| 4.99E-67 | -1.1401947 | 0.005 | 0.165 | 7.07E-63 | B cells | C5ar1     |
| 5.93E-67 | -0.8027575 | 0.003 | 0.16  | 8.40E-63 | B cells | Slc11a1   |
| 1.02E-66 | -0.7637947 | 0.246 | 0.488 | 1.45E-62 | B cells | Psmb9     |
| 1.31E-66 | -1.0800118 | 0.006 | 0.165 | 1.85E-62 | B cells | Cd300ld   |
| 1.57E-66 | -0.7463253 | 0.043 | 0.231 | 2.23E-62 | B cells | Ptpre     |
| 2.38E-66 | -0.7471652 | 0.344 | 0.568 | 3.37E-62 | B cells | Psmb3     |
| 2.42E-66 | -0.6371579 | 0.061 | 0.262 | 3.43E-62 | B cells | Rnf166    |
| 4.44E-66 | -0.831747  | 0.178 | 0.417 | 6.29E-62 | B cells | Saraf     |
| 5.12E-66 | -0.6440669 | 0.002 | 0.157 | 7.24E-62 | B cells | Sla2      |
| 7.31E-66 | -0.9573182 | 0.004 | 0.159 | 1.03E-61 | B cells | Gda       |
| 8.50E-66 | 0.83730729 | 0.369 | 0.191 | 1.20E-61 | B cells | Gem       |
| 8.69E-66 | -0.768309  | 0.624 | 0.75  | 1.23E-61 | B cells | Crip1     |
| 9.11E-66 | -1.0226586 | 0.182 | 0.414 | 1.29E-61 | B cells | Cstb      |
| 1.10E-65 | 0.52449236 | 0.48  | 0.264 | 1.55E-61 | B cells | Ctsh      |
| 1.39E-65 | -0.7231881 | 0.215 | 0.463 | 1.96E-61 | B cells | Capns1    |
| 1.83E-65 | -0.6777418 | 0.003 | 0.157 | 2.59E-61 | B cells | Cx3cr1    |
| 1.92E-65 | -0.728868  | 0.001 | 0.153 | 2.72E-61 | B cells | Fcgr1     |
| 2.64E-65 | 0.82690635 | 0.438 | 0.28  | 3.73E-61 | B cells | Csk       |
| 3.22E-65 | 0.7131822  | 0.204 | 0.07  | 4.56E-61 | B cells | Trp53inp2 |
| 3.48E-65 | 0.74251339 | 0.268 | 0.116 | 4.93E-61 | B cells | Sypl      |
| 4.71E-65 | 0.66196156 | 0.564 | 0.392 | 6.67E-61 | B cells | Tgfb1     |
| 7.15E-65 | -0.9012209 | 0.002 | 0.155 | 1.01E-60 | B cells | Rgs16     |
| 1.01E-64 | -0.8468054 | 0.039 | 0.222 | 1.42E-60 | B cells | Rtp4      |
| 1.18E-64 | -0.6425587 | 0.08  | 0.288 | 1.67E-60 | B cells | Ebp       |
| 1.86E-64 | 0.6208219  | 0.471 | 0.278 | 2.63E-60 | B cells | Ablim1    |
| 2.58E-64 | -1.2405353 | 0.13  | 0.347 | 3.65E-60 | B cells | Mxd1      |
| 2.77E-64 | -0.7650344 | 0.312 | 0.553 | 3.92E-60 | B cells | Ppp1r18   |
| 2.90E-64 | -0.7297678 | 0.2   | 0.44  | 4.11E-60 | B cells | Fkbp1a    |
| 3.14E-64 | -0.7033892 | 0.004 | 0.156 | 4.44E-60 | B cells | Clec4a1   |
| 3.64E-64 | -0.7672839 | 0.179 | 0.41  | 5.15E-60 | B cells | Aprt      |
| 5.44E-64 | -0.73642   | 0     | 0.148 | 7.70E-60 | B cells | Cd226     |
| 5.79E-64 | -1.7702472 | 0.006 | 0.16  | 8.19E-60 | B cells | Trem1     |
| 1.01E-63 | 0.3398672  | 0.975 | 0.9   | 1.43E-59 | B cells | Rpl9-ps6  |
| 1.32E-63 | -0.6786101 | 0.05  | 0.238 | 1.87E-59 | B cells | Sdf2l1    |
| 1.54E-63 | 0.51394261 | 0.802 | 0.656 | 2.18E-59 | B cells | Rps25     |
| 1.77E-63 | -0.7206255 | 0.089 | 0.298 | 2.51E-59 | B cells | Pstpip1   |
| 1.91E-63 | -0.7946787 | 0.215 | 0.443 | 2.70E-59 | B cells | Tomm6     |
| 1.92E-63 | -0.6547697 | 0.016 | 0.178 | 2.72E-59 | B cells | Hsd11b1   |
| 2.07E-63 | -0.7000941 | 0.141 | 0.368 | 2.93E-59 | B cells | Psma4     |
| 2.84E-63 | 0.72741488 | 0.187 | 0.062 | 4.02E-59 | B cells | Lmo2      |
| 3.27E-63 | -0.5327542 | 0.037 | 0.217 | 4.63E-59 | B cells | Ssbp4     |
| 4.40E-63 | -0.9961033 | 0.041 | 0.22  | 6.23E-59 | B cells | Rnf149    |
| 5.03E-63 | -0.6291083 | 0.744 | 0.824 | 7.11E-59 | B cells | Laptm5    |
| 5.95E-63 | 0.5499333  | 0.736 | 0.58  | 8.42E-59 | B cells | Il2rg     |
| 1.11E-62 | -0.806053  | 0.159 | 0.387 | 1.57E-58 | B cells | Cited2    |
| 1.12E-62 | -1.0343255 | 0.011 | 0.167 | 1.59E-58 | B cells | Hmox1     |
| 1.61E-62 | -0.7701093 | 0.05  | 0.233 | 2.28E-58 | B cells | Dhrs7     |

|          |            |       |       |          |         |           |
|----------|------------|-------|-------|----------|---------|-----------|
| 2.21E-62 | -0.5944018 | 0.009 | 0.164 | 3.13E-58 | B cells | Gna15     |
| 2.31E-62 | -1.0848505 | 0.382 | 0.584 | 3.27E-58 | B cells | Taldo1    |
| 2.50E-62 | -0.8671369 | 0.022 | 0.187 | 3.53E-58 | B cells | Fabp5     |
| 3.39E-62 | 0.31033238 | 0.978 | 0.894 | 4.79E-58 | B cells | Rps15a    |
| 4.48E-62 | -1.2052083 | 0.082 | 0.277 | 6.34E-58 | B cells | Nfkbiz    |
| 4.77E-62 | -0.5415979 | 0.039 | 0.217 | 6.75E-58 | B cells | Cmc1      |
| 7.30E-62 | -0.9232638 | 0.245 | 0.481 | 1.03E-57 | B cells | Sdf4      |
| 7.70E-62 | -2.5954808 | 0.01  | 0.161 | 1.09E-57 | B cells | Slpi      |
| 8.55E-62 | -0.7513307 | 0.294 | 0.519 | 1.21E-57 | B cells | Pomp      |
| 9.16E-62 | -0.671618  | 0.11  | 0.326 | 1.30E-57 | B cells | Ifnar2    |
| 9.26E-62 | 0.68042984 | 0.606 | 0.469 | 1.31E-57 | B cells | Pcbp1     |
| 1.15E-61 | -0.7303857 | 0.053 | 0.239 | 1.63E-57 | B cells | Rab8b     |
| 2.06E-61 | -0.6977141 | 0.293 | 0.536 | 2.91E-57 | B cells | Rnaset2a  |
| 2.16E-61 | 0.57098395 | 0.134 | 0.032 | 3.06E-57 | B cells | Strbp     |
| 2.29E-61 | -0.5551617 | 0.002 | 0.146 | 3.24E-57 | B cells | Dok2      |
| 2.86E-61 | -0.9083126 | 0.002 | 0.146 | 4.04E-57 | B cells | Ikzf2     |
| 2.98E-61 | 0.74092876 | 0.252 | 0.108 | 4.22E-57 | B cells | Csnk1g3   |
| 3.64E-61 | -0.8380914 | 0.004 | 0.149 | 5.15E-57 | B cells | Pilra     |
| 3.78E-61 | -0.6347055 | 0.021 | 0.182 | 5.35E-57 | B cells | Gbp7      |
| 7.29E-61 | -0.6417199 | 0.095 | 0.303 | 1.03E-56 | B cells | Etfb      |
| 1.03E-60 | -0.5498338 | 0.002 | 0.145 | 1.46E-56 | B cells | Ppm1h     |
| 2.14E-60 | -0.5172389 | 0.841 | 0.844 | 3.03E-56 | B cells | Serf2     |
| 2.16E-60 | 0.53526764 | 0.138 | 0.035 | 3.05E-56 | B cells | Pold1     |
| 2.85E-60 | 0.73161918 | 0.444 | 0.262 | 4.03E-56 | B cells | Klf4      |
| 3.21E-60 | -0.9720705 | 0.561 | 0.665 | 4.54E-56 | B cells | S100a10   |
| 3.74E-60 | -1.1227548 | 0.036 | 0.203 | 5.29E-56 | B cells | Anxa1     |
| 4.03E-60 | 0.62093373 | 0.317 | 0.15  | 5.70E-56 | B cells | Cd72      |
| 5.15E-60 | -0.5501398 | 0.936 | 0.91  | 7.29E-56 | B cells | H2-K1     |
| 1.09E-59 | -0.8222617 | 0.001 | 0.14  | 1.55E-55 | B cells | Ccr8      |
| 1.10E-59 | -0.6803365 | 0.535 | 0.68  | 1.55E-55 | B cells | Ptpn18    |
| 1.25E-59 | -0.6810702 | 0.002 | 0.143 | 1.77E-55 | B cells | Ifi204    |
| 1.27E-59 | -0.5954103 | 0.004 | 0.146 | 1.79E-55 | B cells | Fam129a   |
| 1.36E-59 | -0.9361997 | 0.014 | 0.165 | 1.92E-55 | B cells | Tmem176b  |
| 1.51E-59 | 0.59670548 | 0.701 | 0.564 | 2.14E-55 | B cells | Gnas      |
| 1.56E-59 | -1.9800785 | 0.002 | 0.143 | 2.21E-55 | B cells | Ifitm1    |
| 1.90E-59 | 0.90209404 | 0.289 | 0.137 | 2.70E-55 | B cells | Gpr183    |
| 2.23E-59 | -0.6775073 | 0.03  | 0.195 | 3.16E-55 | B cells | Serpinb6a |
| 2.47E-59 | -0.7331425 | 0.153 | 0.374 | 3.50E-55 | B cells | Gng2      |
| 4.25E-59 | 0.46055873 | 0.831 | 0.699 | 6.01E-55 | B cells | Shisa5    |
| 4.49E-59 | 0.7284987  | 0.253 | 0.112 | 6.36E-55 | B cells | Map4k1    |
| 4.71E-59 | 0.81529217 | 0.534 | 0.391 | 6.66E-55 | B cells | Tuba1a    |
| 7.37E-59 | -0.7073521 | 0.005 | 0.147 | 1.04E-54 | B cells | Ilgam     |
| 8.11E-59 | -1.3782952 | 0.001 | 0.139 | 1.15E-54 | B cells | Csf3r     |
| 9.40E-59 | 0.75969988 | 0.279 | 0.133 | 1.33E-54 | B cells | Lmbrd1    |
| 9.98E-59 | 0.59370448 | 0.135 | 0.034 | 1.41E-54 | B cells | Neil1     |
| 1.37E-58 | 0.41568569 | 0.859 | 0.742 | 1.95E-54 | B cells | Rbm39     |
| 1.62E-58 | -1.1114071 | 0.005 | 0.145 | 2.29E-54 | B cells | Ifitm6    |
| 2.30E-58 | 0.6609927  | 0.435 | 0.264 | 3.26E-54 | B cells | Tspan13   |

|          |            |       |       |          |         |           |
|----------|------------|-------|-------|----------|---------|-----------|
| 2.31E-58 | -0.9584437 | 0.122 | 0.332 | 3.27E-54 | B cells | Egr1      |
| 2.34E-58 | 0.37891862 | 0.963 | 0.814 | 3.31E-54 | B cells | Rpl10a    |
| 2.35E-58 | -1.1918714 | 0.379 | 0.574 | 3.33E-54 | B cells | Sat1      |
| 2.72E-58 | 0.64888214 | 0.464 | 0.297 | 3.86E-54 | B cells | Macf1     |
| 2.74E-58 | -0.8559987 | 0.005 | 0.145 | 3.88E-54 | B cells | Serpinc6b |
| 3.13E-58 | -0.6818835 | 0.225 | 0.461 | 4.43E-54 | B cells | Ccdc12    |
| 3.30E-58 | -0.5301556 | 0.019 | 0.173 | 4.67E-54 | B cells | Gsto1     |
| 3.65E-58 | -0.9491998 | 0.002 | 0.139 | 5.17E-54 | B cells | Serpinc9  |
| 4.93E-58 | -0.5859777 | 0.003 | 0.141 | 6.98E-54 | B cells | Pid1      |
| 7.70E-58 | -0.4914347 | 0.031 | 0.194 | 1.09E-53 | B cells | Ap1s1     |
| 8.09E-58 | -0.6352514 | 0.015 | 0.165 | 1.15E-53 | B cells | Hip1      |
| 9.28E-58 | -0.5371695 | 0.006 | 0.148 | 1.31E-53 | B cells | Lime1     |
| 9.52E-58 | -0.6603812 | 0.004 | 0.142 | 1.35E-53 | B cells | Tbx21     |
| 1.18E-57 | -0.7838789 | 0.004 | 0.141 | 1.67E-53 | B cells | Nupr1     |
| 1.30E-57 | -0.7304977 | 0.506 | 0.657 | 1.84E-53 | B cells | Eno1      |
| 1.46E-57 | -1.0961076 | 0.004 | 0.142 | 2.07E-53 | B cells | Nlrp3     |
| 1.69E-57 | -0.6155079 | 0.001 | 0.135 | 2.39E-53 | B cells | Bcl11b    |
| 1.80E-57 | -0.8377577 | 0.217 | 0.439 | 2.55E-53 | B cells | Samsn1    |
| 1.81E-57 | 0.53576128 | 0.127 | 0.031 | 2.57E-53 | B cells | Gpd1l     |
| 3.83E-57 | -0.7146047 | 0.006 | 0.145 | 5.42E-53 | B cells | Basp1     |
| 4.29E-57 | -0.661817  | 0.495 | 0.667 | 6.08E-53 | B cells | Atp5h     |
| 6.73E-57 | -0.6736817 | 0.537 | 0.673 | 9.53E-53 | B cells | Cox6c     |
| 7.46E-57 | -0.7406415 | 0.338 | 0.562 | 1.06E-52 | B cells | Cotl1     |
| 7.90E-57 | -0.9162502 | 0.341 | 0.531 | 1.12E-52 | B cells | Mif       |
| 7.97E-57 | -0.6077774 | 0.711 | 0.781 | 1.13E-52 | B cells | Arpc3     |
| 1.20E-56 | 0.74016321 | 0.323 | 0.168 | 1.69E-52 | B cells | Pou2f2    |
| 1.39E-56 | -5.5412941 | 0.036 | 0.19  | 1.97E-52 | B cells | S100a8    |
| 1.41E-56 | -0.6650242 | 0.242 | 0.473 | 2.00E-52 | B cells | Spcs1     |
| 1.45E-56 | -0.6681482 | 0.002 | 0.137 | 2.06E-52 | B cells | Cxcr3     |
| 1.95E-56 | 0.77521021 | 0.293 | 0.143 | 2.76E-52 | B cells | Elmsan1   |
| 1.95E-56 | 0.64024961 | 0.197 | 0.072 | 2.76E-52 | B cells | Fbxo11    |
| 2.15E-56 | -0.7125523 | 0.002 | 0.136 | 3.04E-52 | B cells | Lrp1      |
| 2.24E-56 | -0.5893372 | 0.092 | 0.288 | 3.18E-52 | B cells | Tmem9b    |
| 2.92E-56 | -0.582575  | 0.002 | 0.135 | 4.14E-52 | B cells | Timp2     |
| 3.22E-56 | -0.7697892 | 0.338 | 0.544 | 4.56E-52 | B cells | Gstp1     |
| 3.34E-56 | -0.7970507 | 0.007 | 0.145 | 4.73E-52 | B cells | Ccl9      |
| 3.46E-56 | -0.5950889 | 0.112 | 0.319 | 4.90E-52 | B cells | Cyb5a     |
| 3.81E-56 | -0.7523765 | 0.195 | 0.417 | 5.39E-52 | B cells | Atp1b3    |
| 3.89E-56 | -0.6725063 | 0.04  | 0.205 | 5.51E-52 | B cells | Ccr5      |
| 4.05E-56 | -0.9186176 | 0.114 | 0.309 | 5.74E-52 | B cells | Bhlhe40   |
| 4.37E-56 | -0.7334626 | 0.005 | 0.14  | 6.19E-52 | B cells | Emilin2   |
| 4.38E-56 | -0.6767062 | 0.001 | 0.132 | 6.20E-52 | B cells | Sytl3     |
| 6.49E-56 | -0.7302591 | 0.015 | 0.159 | 9.19E-52 | B cells | Fgr       |
| 7.80E-56 | -0.6561021 | 0.502 | 0.661 | 1.10E-51 | B cells | Ppib      |
| 8.99E-56 | -0.6647839 | 0.199 | 0.422 | 1.27E-51 | B cells | Prdx2     |
| 9.05E-56 | -0.5762003 | 0.071 | 0.255 | 1.28E-51 | B cells | Znhit1    |
| 1.00E-55 | -0.6436543 | 0.212 | 0.439 | 1.42E-51 | B cells | Esd       |
| 1.39E-55 | -0.6692894 | 0.07  | 0.252 | 1.97E-51 | B cells | Hopx      |

|          |            |       |       |          |         |          |
|----------|------------|-------|-------|----------|---------|----------|
| 1.40E-55 | 0.77642642 | 0.375 | 0.218 | 1.98E-51 | B cells | Aff4     |
| 1.46E-55 | -0.8772344 | 0     | 0.13  | 2.06E-51 | B cells | Klre1    |
| 1.64E-55 | -0.7314804 | 0.077 | 0.259 | 2.32E-51 | B cells | Rnf125   |
| 1.98E-55 | -1.200398  | 0.004 | 0.138 | 2.80E-51 | B cells | Ccl2     |
| 2.34E-55 | 0.73645023 | 0.432 | 0.277 | 3.32E-51 | B cells | Inpp5d   |
| 3.80E-55 | -0.7254134 | 0.002 | 0.133 | 5.38E-51 | B cells | C3       |
| 4.52E-55 | -0.5761156 | 0.002 | 0.134 | 6.39E-51 | B cells | Prkcq    |
| 5.06E-55 | -1.6356252 | 0.003 | 0.135 | 7.16E-51 | B cells | Cxcl10   |
| 7.46E-55 | -0.6820159 | 0.028 | 0.181 | 1.06E-50 | B cells | Clec12a  |
| 8.22E-55 | -1.1758478 | 0.102 | 0.29  | 1.16E-50 | B cells | Lmnbl1   |
| 1.04E-54 | -0.5691162 | 0.008 | 0.144 | 1.47E-50 | B cells | Padi2    |
| 1.15E-54 | 0.67599311 | 0.471 | 0.322 | 1.63E-50 | B cells | Cirbp    |
| 1.26E-54 | 0.69794838 | 0.267 | 0.125 | 1.79E-50 | B cells | Etnk1    |
| 1.31E-54 | 0.72587736 | 0.32  | 0.17  | 1.86E-50 | B cells | Nfatc3   |
| 2.17E-54 | -0.7022349 | 0.147 | 0.354 | 3.07E-50 | B cells | Ifi27    |
| 2.17E-54 | -0.5897541 | 0.025 | 0.176 | 3.07E-50 | B cells | Galnt6   |
| 2.18E-54 | -0.6309698 | 0.043 | 0.206 | 3.08E-50 | B cells | Glipr2   |
| 2.33E-54 | -1.0186737 | 0.376 | 0.584 | 3.30E-50 | B cells | Hmgb2    |
| 3.04E-54 | -0.9311957 | 0.337 | 0.554 | 4.30E-50 | B cells | Cdk2ap2  |
| 5.03E-54 | -0.5194573 | 0.043 | 0.207 | 7.12E-50 | B cells | Rps6ka1  |
| 5.85E-54 | 0.75813751 | 0.239 | 0.104 | 8.27E-50 | B cells | Sesn1    |
| 6.50E-54 | -0.6528361 | 0.262 | 0.485 | 9.19E-50 | B cells | Csnk2b   |
| 6.77E-54 | -0.8065855 | 0.001 | 0.128 | 9.58E-50 | B cells | Klrc1    |
| 7.37E-54 | -0.6751536 | 0.03  | 0.183 | 1.04E-49 | B cells | Isg20    |
| 7.87E-54 | -0.6559733 | 0.053 | 0.22  | 1.11E-49 | B cells | Eif4ebp1 |
| 8.45E-54 | -0.6692359 | 0.226 | 0.446 | 1.20E-49 | B cells | Ndufv3   |
| 9.55E-54 | 0.645246   | 0.488 | 0.341 | 1.35E-49 | B cells | Sf1      |
| 1.12E-53 | -0.5542708 | 0.036 | 0.193 | 1.58E-49 | B cells | Igtp     |
| 1.15E-53 | -0.9835781 | 0.004 | 0.134 | 1.63E-49 | B cells | Ly6i     |
| 2.23E-53 | -0.9624932 | 0.062 | 0.231 | 3.16E-49 | B cells | Plk3     |
| 2.40E-53 | -1.2897829 | 0.004 | 0.133 | 3.39E-49 | B cells | Clec4d   |
| 2.98E-53 | 0.82807731 | 0.551 | 0.414 | 4.21E-49 | B cells | Hspd1    |
| 3.27E-53 | -0.4934663 | 0.069 | 0.249 | 4.63E-49 | B cells | Stard3nl |
| 4.00E-53 | -0.5448882 | 0.059 | 0.231 | 5.66E-49 | B cells | Fyn      |
| 4.48E-53 | -0.6255411 | 0.028 | 0.177 | 6.35E-49 | B cells | Mllt3    |
| 4.55E-53 | -0.5922575 | 0.001 | 0.126 | 6.44E-49 | B cells | Igsf6    |
| 4.76E-53 | -0.8118001 | 0.56  | 0.693 | 6.73E-49 | B cells | Atp6v0c  |
| 5.29E-53 | -0.663706  | 0.2   | 0.418 | 7.49E-49 | B cells | Crlf2    |
| 6.59E-53 | -0.7662176 | 0.127 | 0.323 | 9.34E-49 | B cells | Tnfrsf1b |
| 9.04E-53 | -1.0025282 | 0.022 | 0.163 | 1.28E-48 | B cells | Mgst1    |
| 2.20E-52 | -0.7058854 | 0.488 | 0.637 | 3.11E-48 | B cells | Prdx1    |
| 2.21E-52 | -0.7789438 | 0.272 | 0.485 | 3.13E-48 | B cells | Rgs2     |
| 2.58E-52 | 0.68055111 | 0.194 | 0.075 | 3.66E-48 | B cells | Tfam     |
| 2.80E-52 | -0.452405  | 0.006 | 0.136 | 3.96E-48 | B cells | Ppt2     |
| 3.87E-52 | 0.65573741 | 0.432 | 0.279 | 5.48E-48 | B cells | Hnrnph1  |
| 4.40E-52 | -0.6548191 | 0.132 | 0.332 | 6.23E-48 | B cells | Tes      |
| 4.57E-52 | -0.6855568 | 0.302 | 0.53  | 6.47E-48 | B cells | Gpsm3    |
| 4.58E-52 | -0.5265994 | 0.727 | 0.771 | 6.49E-48 | B cells | Cox4i1   |



|          |            |       |       |          |         |          |
|----------|------------|-------|-------|----------|---------|----------|
| 4.81E-52 | -0.7861492 | 0.251 | 0.472 | 6.81E-48 | B cells | Irf1     |
| 6.92E-52 | -0.5312911 | 0.751 | 0.793 | 9.79E-48 | B cells | Cox8a    |
| 8.64E-52 | 0.67170871 | 0.343 | 0.193 | 1.22E-47 | B cells | Rasa3    |
| 8.93E-52 | -0.9881959 | 0.058 | 0.22  | 1.26E-47 | B cells | Trib1    |
| 9.59E-52 | -0.7147698 | 0.002 | 0.126 | 1.36E-47 | B cells | AA467197 |
| 1.04E-51 | -0.606011  | 0.008 | 0.136 | 1.47E-47 | B cells | Sdc3     |
| 1.06E-51 | -0.5464805 | 0.001 | 0.123 | 1.50E-47 | B cells | Ifitm10  |
| 1.41E-51 | -0.6744812 | 0.149 | 0.354 | 2.00E-47 | B cells | Lrrfip1  |
| 1.51E-51 | -0.5317559 | 0.121 | 0.323 | 2.14E-47 | B cells | Vps29    |
| 1.84E-51 | -0.6284548 | 0.37  | 0.579 | 2.61E-47 | B cells | Rac1     |
| 1.92E-51 | -0.5594503 | 0.059 | 0.228 | 2.71E-47 | B cells | Gnptg    |
| 2.16E-51 | -0.502871  | 0.015 | 0.151 | 3.05E-47 | B cells | Impa2    |
| 2.58E-51 | -0.6833811 | 0.128 | 0.324 | 3.65E-47 | B cells | Cd82     |
| 2.80E-51 | -0.8240812 | 0.091 | 0.266 | 3.96E-47 | B cells | Dut      |
| 3.06E-51 | -0.526892  | 0.102 | 0.295 | 4.34E-47 | B cells | Cnih4    |
| 4.20E-51 | -0.7774698 | 0.098 | 0.276 | 5.95E-47 | B cells | Gimap7   |
| 5.08E-51 | -0.5257935 | 0.158 | 0.369 | 7.19E-47 | B cells | Tmem160  |
| 5.32E-51 | -0.4872247 | 0.004 | 0.127 | 7.53E-47 | B cells | Iqgap2   |
| 7.96E-51 | 0.56358223 | 0.162 | 0.055 | 1.13E-46 | B cells | Plekhm1  |
| 1.30E-50 | -0.6905966 | 0.093 | 0.272 | 1.85E-46 | B cells | Smpdl3a  |
| 1.43E-50 | 0.75956178 | 0.212 | 0.091 | 2.02E-46 | B cells | Txndc5   |
| 1.51E-50 | -0.5741494 | 0.003 | 0.125 | 2.14E-46 | B cells | Klra2    |
| 2.55E-50 | -0.6855097 | 0.453 | 0.614 | 3.61E-46 | B cells | Cox5a    |
| 2.76E-50 | -0.9224806 | 0.513 | 0.65  | 3.91E-46 | B cells | Ifi2712a |
| 2.81E-50 | -0.4939423 | 0.058 | 0.223 | 3.98E-46 | B cells | Bscl2    |
| 3.09E-50 | -0.4755645 | 0.012 | 0.141 | 4.37E-46 | B cells | Tubb6    |
| 3.24E-50 | -0.5435196 | 0.163 | 0.376 | 4.59E-46 | B cells | Ap2s1    |
| 3.50E-50 | -0.4769898 | 0.044 | 0.199 | 4.95E-46 | B cells | Ap3s1    |
| 3.58E-50 | -0.6971959 | 0.24  | 0.456 | 5.06E-46 | B cells | Gm8797   |
| 4.53E-50 | 0.65919056 | 0.205 | 0.085 | 6.41E-46 | B cells | Pml      |
| 6.33E-50 | -0.4944428 | 0.076 | 0.252 | 8.97E-46 | B cells | Pigx     |
| 6.44E-50 | -0.4569988 | 0.005 | 0.128 | 9.12E-46 | B cells | Tmem106a |
| 7.03E-50 | -0.6670455 | 0.225 | 0.441 | 9.96E-46 | B cells | Cd48     |
| 8.20E-50 | -0.8246439 | 0.001 | 0.12  | 1.16E-45 | B cells | Mccomp1  |
| 9.43E-50 | -1.9970794 | 0.018 | 0.15  | 1.34E-45 | B cells | Il1r2    |
| 1.02E-49 | 0.74505471 | 0.224 | 0.101 | 1.45E-45 | B cells | Nrm      |
| 2.25E-49 | -2.53133   | 0.005 | 0.125 | 3.18E-45 | B cells | G0s2     |
| 2.91E-49 | -0.52026   | 0.016 | 0.147 | 4.12E-45 | B cells | Abr      |
| 3.14E-49 | -0.4377299 | 0.01  | 0.136 | 4.44E-45 | B cells | Spr      |
| 3.39E-49 | 0.50575643 | 0.627 | 0.496 | 4.80E-45 | B cells | Dazap2   |
| 3.61E-49 | -1.1966626 | 0.18  | 0.366 | 5.10E-45 | B cells | Atf3     |
| 5.02E-49 | -0.6302439 | 0.013 | 0.142 | 7.11E-45 | B cells | Actn1    |
| 7.17E-49 | 0.44018302 | 0.754 | 0.631 | 1.01E-44 | B cells | Rhoa     |
| 1.47E-48 | -0.4285293 | 0.884 | 0.876 | 2.08E-44 | B cells | Oaz1     |
| 1.60E-48 | -0.6747981 | 0.002 | 0.119 | 2.27E-44 | B cells | Sirpb1b  |
| 1.64E-48 | 0.74182905 | 0.175 | 0.065 | 2.33E-44 | B cells | Sfn      |
| 1.74E-48 | -0.699275  | 0.018 | 0.147 | 2.46E-44 | B cells | Csf2rb   |
| 2.08E-48 | 0.25031502 | 0.978 | 0.935 | 2.94E-44 | B cells | Eif1     |

|          |            |       |       |          |         |          |
|----------|------------|-------|-------|----------|---------|----------|
| 2.16E-48 | -0.9040754 | 0.005 | 0.123 | 3.05E-44 | B cells | Il1rn    |
| 2.74E-48 | 0.47031733 | 0.104 | 0.024 | 3.88E-44 | B cells | Snx29    |
| 3.01E-48 | -0.6309243 | 0.496 | 0.634 | 4.26E-44 | B cells | Cox6b1   |
| 3.11E-48 | 0.33909084 | 0.93  | 0.8   | 4.40E-44 | B cells | Rps18    |
| 3.27E-48 | 0.65382626 | 0.226 | 0.102 | 4.63E-44 | B cells | Helz2    |
| 4.05E-48 | -0.5380495 | 0.003 | 0.119 | 5.73E-44 | B cells | Clec4a2  |
| 7.80E-48 | -0.5989613 | 0.112 | 0.297 | 1.10E-43 | B cells | Gpr65    |
| 9.59E-48 | 0.4607634  | 0.11  | 0.028 | 1.36E-43 | B cells | Acsf2    |
| 1.17E-47 | -0.5779562 | 0.001 | 0.115 | 1.66E-43 | B cells | Ltb4r1   |
| 1.48E-47 | -0.8335191 | 0.003 | 0.118 | 2.10E-43 | B cells | Ms4a7    |
| 1.58E-47 | -0.5208731 | 0.004 | 0.121 | 2.23E-43 | B cells | Runx2    |
| 1.75E-47 | -0.68453   | 0.002 | 0.116 | 2.48E-43 | B cells | Nrn1     |
| 1.79E-47 | -0.7564656 | 0.07  | 0.231 | 2.53E-43 | B cells | Eea1     |
| 1.96E-47 | -1.3310076 | 0.353 | 0.492 | 2.77E-43 | B cells | Ly6a     |
| 2.00E-47 | 0.50266236 | 0.127 | 0.037 | 2.84E-43 | B cells | Dus2     |
| 2.44E-47 | 0.49115149 | 0.118 | 0.032 | 3.46E-43 | B cells | Gucd1    |
| 2.72E-47 | -0.5964508 | 0.174 | 0.378 | 3.85E-43 | B cells | Epsti1   |
| 2.76E-47 | -0.6054511 | 0.051 | 0.204 | 3.90E-43 | B cells | Gtf2i    |
| 3.12E-47 | -0.6272847 | 0.011 | 0.132 | 4.42E-43 | B cells | Tlr2     |
| 3.16E-47 | -0.5153757 | 0.079 | 0.25  | 4.48E-43 | B cells | Dap      |
| 3.78E-47 | 0.61360826 | 0.373 | 0.228 | 5.35E-43 | B cells | Tgfbr2   |
| 5.13E-47 | 0.60919925 | 0.315 | 0.171 | 7.26E-43 | B cells | Dok3     |
| 5.62E-47 | -0.5915106 | 0.298 | 0.507 | 7.96E-43 | B cells | Ssr4     |
| 6.04E-47 | 0.2591405  | 0.972 | 0.922 | 8.55E-43 | B cells | Rps27a   |
| 6.28E-47 | -0.3761362 | 0.006 | 0.123 | 8.89E-43 | B cells | Lxn      |
| 7.07E-47 | -0.4958523 | 0.001 | 0.112 | 1.00E-42 | B cells | Slc22a15 |
| 7.50E-47 | -0.5013874 | 0.005 | 0.12  | 1.06E-42 | B cells | Gbp8     |
| 7.62E-47 | -0.8320831 | 0.013 | 0.136 | 1.08E-42 | B cells | Cd300lf  |
| 7.84E-47 | 0.56465498 | 0.174 | 0.066 | 1.11E-42 | B cells | Heg1     |
| 7.98E-47 | -0.7820659 | 0.361 | 0.556 | 1.13E-42 | B cells | Ndfip1   |
| 8.99E-47 | -0.6123562 | 0.144 | 0.334 | 1.27E-42 | B cells | Ccnd2    |
| 1.01E-46 | -1.590842  | 0.008 | 0.126 | 1.43E-42 | B cells | Hdc      |
| 1.13E-46 | 0.59678403 | 0.17  | 0.064 | 1.60E-42 | B cells | Rabep2   |
| 1.14E-46 | -0.4341946 | 0.019 | 0.147 | 1.61E-42 | B cells | Capn2    |
| 1.24E-46 | -0.4469766 | 0.003 | 0.116 | 1.75E-42 | B cells | Cd302    |
| 1.36E-46 | -0.4157152 | 0.058 | 0.216 | 1.92E-42 | B cells | Tmed3    |
| 1.36E-46 | -0.9050864 | 0.125 | 0.305 | 1.93E-42 | B cells | Rgcc     |
| 1.65E-46 | 0.59443403 | 0.261 | 0.129 | 2.34E-42 | B cells | Map4k2   |
| 1.65E-46 | -0.4217938 | 0.002 | 0.115 | 2.34E-42 | B cells | P2ry6    |
| 1.72E-46 | 0.39143488 | 0.206 | 0.09  | 2.44E-42 | B cells | 1-Mar    |
| 1.74E-46 | -0.4864193 | 0.006 | 0.123 | 2.46E-42 | B cells | Cers6    |
| 1.89E-46 | -0.596866  | 0.06  | 0.215 | 2.67E-42 | B cells | Pkp3     |
| 1.97E-46 | -0.4566818 | 0     | 0.11  | 2.80E-42 | B cells | Sdcbp2   |
| 2.00E-46 | -0.6324197 | 0.35  | 0.542 | 2.83E-42 | B cells | Psma7    |
| 2.08E-46 | -0.4562658 | 0.011 | 0.132 | 2.95E-42 | B cells | Ccdc88b  |
| 2.56E-46 | -0.5895026 | 0.004 | 0.118 | 3.62E-42 | B cells | Trf      |
| 2.73E-46 | 0.45301749 | 0.616 | 0.436 | 3.87E-42 | B cells | Ltb      |
| 2.82E-46 | -0.541003  | 0.001 | 0.112 | 3.99E-42 | B cells | Cd160    |

|          |            |       |       |          |         |         |
|----------|------------|-------|-------|----------|---------|---------|
| 3.07E-46 | -0.518502  | 0.84  | 0.847 | 4.34E-42 | B cells | Calm1   |
| 3.53E-46 | -0.686697  | 0.015 | 0.139 | 5.00E-42 | B cells | Txk     |
| 3.62E-46 | 1.42108304 | 0.539 | 0.441 | 5.13E-42 | B cells | Hspa1a  |
| 4.07E-46 | -0.4303568 | 0.015 | 0.139 | 5.76E-42 | B cells | Smco4   |
| 4.52E-46 | -0.5289121 | 0.048 | 0.197 | 6.40E-42 | B cells | Ap1s2   |
| 4.68E-46 | -0.6780123 | 0.197 | 0.397 | 6.62E-42 | B cells | Stat1   |
| 4.92E-46 | -0.5115744 | 0.202 | 0.408 | 6.97E-42 | B cells | Dbi     |
| 4.96E-46 | 0.66894806 | 0.357 | 0.218 | 7.02E-42 | B cells | Plekha2 |
| 5.76E-46 | -0.4845855 | 0.055 | 0.209 | 8.16E-42 | B cells | Pfkf    |
| 6.54E-46 | -0.7487508 | 0.017 | 0.141 | 9.26E-42 | B cells | Tnf     |
| 8.32E-46 | -0.5892517 | 0.575 | 0.682 | 1.18E-41 | B cells | Atp5g3  |
| 9.18E-46 | -0.7295144 | 0.002 | 0.112 | 1.30E-41 | B cells | Tcf7    |
| 1.10E-45 | 0.58503577 | 0.178 | 0.07  | 1.56E-41 | B cells | Lpgat1  |
| 1.13E-45 | 0.61959328 | 0.168 | 0.064 | 1.60E-41 | B cells | Pkib    |
| 1.14E-45 | -0.5497571 | 0.159 | 0.358 | 1.61E-41 | B cells | H13     |
| 1.15E-45 | -1.4866793 | 0.006 | 0.12  | 1.62E-41 | B cells | Thbs1   |
| 1.55E-45 | 0.70058873 | 0.347 | 0.215 | 2.19E-41 | B cells | Smap2   |
| 1.73E-45 | -0.3799103 | 0.037 | 0.178 | 2.44E-41 | B cells | Blvra   |
| 2.20E-45 | -1.5473361 | 0.459 | 0.605 | 3.11E-41 | B cells | Cebpb   |
| 2.26E-45 | 0.51581112 | 0.615 | 0.491 | 3.20E-41 | B cells | Hnrnpk  |
| 3.10E-45 | -0.3748874 | 0.02  | 0.147 | 4.39E-41 | B cells | Il3ra   |
| 3.21E-45 | -0.5622492 | 0.177 | 0.38  | 4.54E-41 | B cells | Dynlrb1 |
| 4.21E-45 | -3.5276205 | 0.009 | 0.123 | 5.96E-41 | B cells | Retnlg  |
| 4.40E-45 | -0.4998    | 0.07  | 0.231 | 6.23E-41 | B cells | Lfng    |
| 4.73E-45 | -0.5704059 | 0.245 | 0.453 | 6.70E-41 | B cells | Sdhd    |
| 4.79E-45 | -0.5813387 | 0.156 | 0.346 | 6.78E-41 | B cells | Slc25a4 |
| 5.57E-45 | 0.6788594  | 0.356 | 0.221 | 7.88E-41 | B cells | Matr3   |
| 5.96E-45 | 0.48063029 | 0.176 | 0.066 | 8.44E-41 | B cells | Mirt1   |
| 6.26E-45 | -0.4244439 | 0.001 | 0.109 | 8.86E-41 | B cells | Hfe     |
| 6.72E-45 | -0.7430136 | 0.091 | 0.252 | 9.51E-41 | B cells | Ninj1   |
| 1.05E-44 | -0.4726361 | 0.001 | 0.107 | 1.49E-40 | B cells | Cd200r1 |
| 1.20E-44 | -0.8009906 | 0.001 | 0.108 | 1.70E-40 | B cells | Gcnt2   |
| 1.21E-44 | -0.4615446 | 0.002 | 0.109 | 1.72E-40 | B cells | Rhoc    |
| 1.30E-44 | -5.8513866 | 0.061 | 0.197 | 1.84E-40 | B cells | S100a9  |
| 1.39E-44 | 0.30090586 | 0.975 | 0.885 | 1.96E-40 | B cells | Rps3    |
| 1.60E-44 | -0.9159152 | 0.004 | 0.114 | 2.26E-40 | B cells | Osm     |
| 1.67E-44 | -0.458296  | 0.055 | 0.205 | 2.36E-40 | B cells | Evi2a   |
| 1.85E-44 | 0.70514433 | 0.348 | 0.209 | 2.63E-40 | B cells | Nrros   |
| 1.93E-44 | -0.8450345 | 0.082 | 0.24  | 2.73E-40 | B cells | Dgat1   |
| 2.19E-44 | -0.9607153 | 0.12  | 0.284 | 3.10E-40 | B cells | Hilpda  |
| 2.27E-44 | 0.5824248  | 0.181 | 0.074 | 3.21E-40 | B cells | Tec     |
| 2.34E-44 | -0.4761478 | 0.016 | 0.136 | 3.32E-40 | B cells | Kcnn4   |
| 2.89E-44 | -1.1412957 | 0.003 | 0.111 | 4.09E-40 | B cells | Hcar2   |
| 3.33E-44 | -0.646174  | 0.027 | 0.156 | 4.71E-40 | B cells | Nfam1   |
| 3.38E-44 | 0.5723155  | 0.32  | 0.178 | 4.78E-40 | B cells | Ms4a4c  |
| 4.07E-44 | -0.4037632 | 0.003 | 0.11  | 5.76E-40 | B cells | Slamf8  |
| 4.50E-44 | -0.5196941 | 0.02  | 0.143 | 6.37E-40 | B cells | Fes     |
| 4.53E-44 | -0.3977862 | 0.021 | 0.146 | 6.41E-40 | B cells | Oas1a   |

|          |            |       |       |          |         |             |
|----------|------------|-------|-------|----------|---------|-------------|
| 6.96E-44 | -0.4080888 | 0.027 | 0.157 | 9.85E-40 | B cells | Ggh         |
| 7.86E-44 | 0.52390641 | 0.144 | 0.049 | 1.11E-39 | B cells | Cbx7        |
| 8.89E-44 | 0.6359296  | 0.182 | 0.075 | 1.26E-39 | B cells | Rpia        |
| 9.78E-44 | -0.4848955 | 0.15  | 0.344 | 1.38E-39 | B cells | Txndc17     |
| 1.09E-43 | -1.2630419 | 0.513 | 0.657 | 1.54E-39 | B cells | Dusp1       |
| 1.14E-43 | -0.4674723 | 0.001 | 0.105 | 1.61E-39 | B cells | Ctla2b      |
| 1.25E-43 | -0.4855202 | 0.004 | 0.111 | 1.77E-39 | B cells | Atp8b4      |
| 1.44E-43 | -0.3834377 | 0.014 | 0.132 | 2.04E-39 | B cells | Eva1b       |
| 1.52E-43 | -0.5852812 | 0.05  | 0.193 | 2.15E-39 | B cells | Ass1        |
| 1.52E-43 | -0.5271118 | 0.002 | 0.107 | 2.15E-39 | B cells | Bcl2a1a     |
| 1.67E-43 | 0.58206927 | 0.199 | 0.087 | 2.36E-39 | B cells | Med13       |
| 1.88E-43 | 0.52633485 | 0.575 | 0.462 | 2.66E-39 | B cells | Eef1g       |
| 1.90E-43 | -0.7518586 | 0.172 | 0.358 | 2.68E-39 | B cells | Hif1a       |
| 2.17E-43 | 0.49210065 | 0.143 | 0.049 | 3.08E-39 | B cells | Atp6v0a1    |
| 2.22E-43 | 0.64038231 | 0.305 | 0.174 | 3.14E-39 | B cells | Rcsd1       |
| 2.38E-43 | -0.5835225 | 0.009 | 0.12  | 3.38E-39 | B cells | Tmem176a    |
| 2.73E-43 | -0.5865342 | 0.305 | 0.507 | 3.87E-39 | B cells | 1810037I17R |
| 2.84E-43 | -0.5507527 | 0.575 | 0.687 | 4.02E-39 | B cells | Atp5l       |
| 2.99E-43 | -0.5293695 | 0.003 | 0.108 | 4.23E-39 | B cells | Hacd4       |
| 3.56E-43 | 0.50193708 | 0.142 | 0.049 | 5.03E-39 | B cells | Hhex        |
| 3.67E-43 | -0.5428083 | 0.05  | 0.191 | 5.20E-39 | B cells | Mbp         |
| 4.18E-43 | -0.7829284 | 0.068 | 0.214 | 5.92E-39 | B cells | Pirb        |
| 4.19E-43 | -0.6317104 | 0.004 | 0.111 | 5.93E-39 | B cells | Iigp1       |
| 5.75E-43 | -0.436144  | 0.004 | 0.109 | 8.13E-39 | B cells | Camk4       |
| 7.22E-43 | -0.4701963 | 0.001 | 0.103 | 1.02E-38 | B cells | Cd96        |
| 8.41E-43 | -0.9555978 | 0.026 | 0.149 | 1.19E-38 | B cells | Il7r        |
| 8.65E-43 | -0.5085096 | 0.017 | 0.135 | 1.22E-38 | B cells | Tgtp2       |
| 8.70E-43 | 0.77308285 | 0.389 | 0.269 | 1.23E-38 | B cells | Pold4       |
| 8.82E-43 | -0.6758704 | 0.079 | 0.234 | 1.25E-38 | B cells | Picalm      |
| 9.36E-43 | -0.5196105 | 0.173 | 0.367 | 1.33E-38 | B cells | Rwdd1       |
| 9.46E-43 | -0.4702086 | 0.022 | 0.144 | 1.34E-38 | B cells | Pik3r5      |
| 1.03E-42 | -1.2815661 | 0.001 | 0.104 | 1.45E-38 | B cells | Slc7a11     |
| 1.07E-42 | 0.562497   | 0.162 | 0.062 | 1.52E-38 | B cells | Bmp2k       |
| 1.29E-42 | 0.5530262  | 0.146 | 0.052 | 1.82E-38 | B cells | Clec2i      |
| 1.32E-42 | -0.5105373 | 0.003 | 0.107 | 1.87E-38 | B cells | Sult2b1     |
| 1.43E-42 | 0.55436746 | 0.553 | 0.436 | 2.02E-38 | B cells | Kmt2e       |
| 1.71E-42 | -0.4540516 | 0.022 | 0.144 | 2.42E-38 | B cells | Snx10       |
| 1.75E-42 | -0.5758283 | 0.489 | 0.637 | 2.48E-38 | B cells | Atp5j2      |
| 2.09E-42 | -0.5096502 | 0.001 | 0.102 | 2.96E-38 | B cells | Atp2b4      |
| 2.36E-42 | -0.4122086 | 0.043 | 0.18  | 3.34E-38 | B cells | Xaf1        |
| 2.56E-42 | -0.8163571 | 0.051 | 0.188 | 3.62E-38 | B cells | Ctsl        |
| 3.33E-42 | -0.3712377 | 0.022 | 0.144 | 4.71E-38 | B cells | Eif4e3      |
| 3.59E-42 | -0.407559  | 0.001 | 0.101 | 5.08E-38 | B cells | Ubash3a     |
| 4.43E-42 | 0.61318225 | 0.389 | 0.251 | 6.27E-38 | B cells | Crlf3       |
| 5.49E-42 | -0.6416455 | 0.022 | 0.142 | 7.77E-38 | B cells | Slc15a3     |
| 5.64E-42 | 0.38966582 | 0.906 | 0.868 | 7.99E-38 | B cells | Junb        |
| 5.90E-42 | -0.5927621 | 0.042 | 0.175 | 8.35E-38 | B cells | Svil        |
| 8.25E-42 | -0.5312429 | 0.102 | 0.267 | 1.17E-37 | B cells | Phf11b      |

|          |            |       |       |          |         |            |
|----------|------------|-------|-------|----------|---------|------------|
| 9.72E-42 | -0.3556284 | 0.041 | 0.178 | 1.38E-37 | B cells | Comt       |
| 1.22E-41 | -0.5428591 | 0.239 | 0.445 | 1.72E-37 | B cells | Cope       |
| 1.30E-41 | -0.5154833 | 0.011 | 0.121 | 1.84E-37 | B cells | Itm2a      |
| 1.31E-41 | -0.6237019 | 0.002 | 0.103 | 1.85E-37 | B cells | Gatm       |
| 1.31E-41 | 0.5293824  | 0.55  | 0.428 | 1.85E-37 | B cells | Arhgef1    |
| 1.31E-41 | -0.6728216 | 0.032 | 0.157 | 1.86E-37 | B cells | Maf        |
| 1.59E-41 | -1.6225527 | 0.448 | 0.558 | 2.24E-37 | B cells | Psap       |
| 1.63E-41 | -0.4491986 | 0.028 | 0.153 | 2.31E-37 | B cells | Flot1      |
| 1.77E-41 | 0.62916583 | 0.219 | 0.106 | 2.51E-37 | B cells | Myo1c      |
| 2.44E-41 | -0.5931163 | 0.456 | 0.609 | 3.45E-37 | B cells | Atp5j      |
| 2.52E-41 | -0.3865987 | 0.002 | 0.102 | 3.56E-37 | B cells | Hnrnp1l    |
| 2.91E-41 | -0.5168213 | 0.052 | 0.191 | 4.12E-37 | B cells | Cndp2      |
| 3.13E-41 | -0.4688795 | 0.015 | 0.127 | 4.43E-37 | B cells | Cish       |
| 3.65E-41 | 0.53897916 | 0.148 | 0.054 | 5.17E-37 | B cells | Fgfr1op    |
| 3.77E-41 | -0.4870059 | 0.05  | 0.187 | 5.33E-37 | B cells | Map7d1     |
| 4.38E-41 | -0.4669017 | 0.051 | 0.19  | 6.20E-37 | B cells | Dnajc1     |
| 4.83E-41 | -0.5267316 | 0.404 | 0.596 | 6.83E-37 | B cells | Tagln2     |
| 5.90E-41 | 0.61998145 | 0.286 | 0.165 | 8.36E-37 | B cells | Arhgap17   |
| 6.12E-41 | -0.8526522 | 0.008 | 0.112 | 8.66E-37 | B cells | Ccr1       |
| 6.60E-41 | -0.7418547 | 0.187 | 0.367 | 9.34E-37 | B cells | Rrbp1      |
| 9.73E-41 | -0.6714216 | 0.002 | 0.1   | 1.38E-36 | B cells | Gm9733     |
| 1.04E-40 | -0.5195725 | 0.216 | 0.415 | 1.48E-36 | B cells | Chmp2a     |
| 1.08E-40 | -0.5016054 | 0.019 | 0.133 | 1.53E-36 | B cells | Arsb       |
| 1.39E-40 | -0.4321129 | 0.012 | 0.12  | 1.97E-36 | B cells | St3gal4    |
| 1.40E-40 | -0.4616155 | 0.027 | 0.149 | 1.99E-36 | B cells | Nlrc5      |
| 1.41E-40 | 0.49795903 | 0.11  | 0.032 | 1.99E-36 | B cells | Icosl      |
| 1.62E-40 | 0.57865347 | 0.172 | 0.071 | 2.30E-36 | B cells | A630001G21 |
| 1.80E-40 | -0.5474083 | 0.054 | 0.192 | 2.55E-36 | B cells | Snx18      |
| 2.06E-40 | -0.3834009 | 0.002 | 0.101 | 2.91E-36 | B cells | Stk39      |
| 2.25E-40 | -0.5441004 | 0.075 | 0.225 | 3.18E-36 | B cells | Icam1      |
| 2.27E-40 | -0.5399512 | 0.212 | 0.406 | 3.21E-36 | B cells | Slc3a2     |
| 3.27E-40 | 0.62355365 | 0.244 | 0.124 | 4.63E-36 | B cells | Lamb3      |
| 3.57E-40 | 0.70593632 | 0.248 | 0.129 | 5.05E-36 | B cells | Gpr18      |
| 3.90E-40 | -0.5625197 | 0.03  | 0.151 | 5.52E-36 | B cells | Nabp1      |
| 4.43E-40 | 0.5694443  | 0.179 | 0.075 | 6.28E-36 | B cells | Gm15987    |
| 4.94E-40 | -0.6349348 | 0.072 | 0.217 | 6.99E-36 | B cells | Nr4a3      |
| 5.24E-40 | -0.5122655 | 0.004 | 0.102 | 7.42E-36 | B cells | Trem2      |
| 1.11E-39 | -0.5755319 | 0.02  | 0.133 | 1.57E-35 | B cells | Cfp        |
| 1.27E-39 | 0.57755718 | 0.224 | 0.109 | 1.80E-35 | B cells | Avl9       |
| 1.72E-39 | -0.6333006 | 0.035 | 0.159 | 2.44E-35 | B cells | Bag3       |
| 1.73E-39 | 0.54045568 | 0.548 | 0.449 | 2.45E-35 | B cells | Zfp706     |
| 1.80E-39 | -0.4428817 | 0.02  | 0.134 | 2.54E-35 | B cells | Mdfic      |
| 2.07E-39 | 0.58755137 | 0.231 | 0.116 | 2.94E-35 | B cells | Klhl24     |
| 2.64E-39 | -0.4646154 | 0.202 | 0.401 | 3.74E-35 | B cells | Dctn3      |
| 3.51E-39 | -0.6659079 | 0.058 | 0.193 | 4.97E-35 | B cells | Marcks     |
| 4.14E-39 | -0.5531132 | 0.087 | 0.238 | 5.86E-35 | B cells | Ppt1       |
| 4.21E-39 | -0.53604   | 0.004 | 0.101 | 5.96E-35 | B cells | Smox       |
| 4.71E-39 | -0.5036975 | 0.19  | 0.38  | 6.66E-35 | B cells | Cuta       |

|          |            |       |       |          |         |          |
|----------|------------|-------|-------|----------|---------|----------|
| 4.86E-39 | 0.60355    | 0.53  | 0.419 | 6.88E-35 | B cells | Tubb4b   |
| 5.70E-39 | -0.4918625 | 0.011 | 0.115 | 8.06E-35 | B cells | Atxn1    |
| 7.63E-39 | -0.4126857 | 0.007 | 0.107 | 1.08E-34 | B cells | Tppp3    |
| 8.64E-39 | -1.5942965 | 0.127 | 0.278 | 1.22E-34 | B cells | Wfdc17   |
| 8.75E-39 | -0.510242  | 0.051 | 0.184 | 1.24E-34 | B cells | Pitpnc1  |
| 9.44E-39 | -0.5183697 | 0.2   | 0.391 | 1.34E-34 | B cells | Higd1a   |
| 1.28E-38 | -0.3903912 | 0.033 | 0.154 | 1.81E-34 | B cells | Ptpn7    |
| 2.71E-38 | 0.31240574 | 0.813 | 0.67  | 3.84E-34 | B cells | Pabpc1   |
| 3.15E-38 | -0.5706701 | 0.394 | 0.562 | 4.45E-34 | B cells | Reep5    |
| 3.24E-38 | -0.4224328 | 0.101 | 0.26  | 4.59E-34 | B cells | Nmi      |
| 3.28E-38 | 0.5090371  | 0.146 | 0.055 | 4.64E-34 | B cells | Card6    |
| 3.37E-38 | -0.439572  | 0.131 | 0.3   | 4.77E-34 | B cells | Tbcb     |
| 3.37E-38 | -0.5168264 | 0.279 | 0.469 | 4.78E-34 | B cells | Ndufb7   |
| 3.58E-38 | 0.76424181 | 0.304 | 0.184 | 5.07E-34 | B cells | Herpud1  |
| 4.29E-38 | -0.666497  | 0.113 | 0.266 | 6.07E-34 | B cells | Zeb2     |
| 4.81E-38 | 0.61008715 | 0.289 | 0.17  | 6.81E-34 | B cells | Grk6     |
| 6.35E-38 | -0.5385971 | 0.136 | 0.302 | 8.99E-34 | B cells | Rnh1     |
| 6.82E-38 | -0.3129253 | 0.047 | 0.177 | 9.65E-34 | B cells | Mpv17l2  |
| 6.86E-38 | -0.5164536 | 0.998 | 0.998 | 9.71E-34 | B cells | Gm42418  |
| 7.14E-38 | -0.4921472 | 0.017 | 0.123 | 1.01E-33 | B cells | Rab20    |
| 7.65E-38 | -0.3522283 | 0.036 | 0.157 | 1.08E-33 | B cells | Mettl9   |
| 7.67E-38 | -0.4340841 | 0.169 | 0.355 | 1.09E-33 | B cells | Ier3ip1  |
| 1.09E-37 | -0.4752063 | 0.078 | 0.223 | 1.54E-33 | B cells | Pld3     |
| 1.09E-37 | -0.6139461 | 0.005 | 0.1   | 1.55E-33 | B cells | Pygl     |
| 1.55E-37 | -0.32732   | 0.009 | 0.108 | 2.19E-33 | B cells | Ctnnbip1 |
| 1.56E-37 | -0.2908891 | 0.04  | 0.165 | 2.20E-33 | B cells | Fbxo6    |
| 1.64E-37 | -0.365277  | 0.022 | 0.133 | 2.33E-33 | B cells | Acer3    |
| 2.11E-37 | -0.3288145 | 0.006 | 0.101 | 2.99E-33 | B cells | Vps26b   |
| 2.24E-37 | -0.3952917 | 0.009 | 0.107 | 3.17E-33 | B cells | H1f0     |
| 3.04E-37 | -0.4656505 | 0.012 | 0.112 | 4.30E-33 | B cells | Rab27a   |
| 3.42E-37 | -0.4110607 | 0.009 | 0.108 | 4.84E-33 | B cells | Rgs3     |
| 3.75E-37 | -0.5204    | 0.495 | 0.634 | 5.32E-33 | B cells | Sec61b   |
| 3.91E-37 | -0.5141349 | 0.295 | 0.485 | 5.53E-33 | B cells | Mrpl52   |
| 4.17E-37 | 0.51521199 | 0.13  | 0.046 | 5.91E-33 | B cells | Hao      |
| 4.95E-37 | 0.68976399 | 0.331 | 0.219 | 7.01E-33 | B cells | Dnajc7   |
| 5.99E-37 | 0.56595201 | 0.453 | 0.337 | 8.47E-33 | B cells | Stk24    |
| 6.89E-37 | -0.5270252 | 0.611 | 0.709 | 9.75E-33 | B cells | Eif5a    |
| 7.53E-37 | -0.5578099 | 0.424 | 0.585 | 1.07E-32 | B cells | Arpc4    |
| 1.16E-36 | 0.6146179  | 0.224 | 0.117 | 1.65E-32 | B cells | Egln2    |
| 1.23E-36 | -0.4766627 | 0.183 | 0.364 | 1.74E-32 | B cells | Ndufb6   |
| 1.30E-36 | 0.64316445 | 0.397 | 0.283 | 1.83E-32 | B cells | Mat2a    |
| 1.48E-36 | -0.4646091 | 0.1   | 0.253 | 2.09E-32 | B cells | Os9      |
| 1.53E-36 | -0.3528283 | 0.048 | 0.175 | 2.17E-32 | B cells | Rsu1     |
| 1.66E-36 | -0.3844046 | 0.083 | 0.229 | 2.35E-32 | B cells | Elovl1   |
| 1.84E-36 | -0.3767482 | 0.016 | 0.118 | 2.61E-32 | B cells | Anxa4    |
| 2.00E-36 | -0.3833896 | 0.083 | 0.231 | 2.83E-32 | B cells | Fkbp2    |
| 2.27E-36 | -0.4311523 | 0.009 | 0.105 | 3.21E-32 | B cells | Adgre1   |
| 2.39E-36 | 0.41132504 | 0.721 | 0.605 | 3.38E-32 | B cells | Rpl31    |

|          |            |       |       |          |         |           |
|----------|------------|-------|-------|----------|---------|-----------|
| 3.09E-36 | -0.4085412 | 0.027 | 0.138 | 4.38E-32 | B cells | Fam189b   |
| 3.19E-36 | -0.3597825 | 0.095 | 0.246 | 4.51E-32 | B cells | Dctn6     |
| 3.38E-36 | 0.46820672 | 0.151 | 0.06  | 4.78E-32 | B cells | Rras2     |
| 3.40E-36 | -0.3050119 | 0.022 | 0.13  | 4.81E-32 | B cells | Htatip2   |
| 3.68E-36 | -0.4629277 | 0.184 | 0.369 | 5.20E-32 | B cells | Anapc11   |
| 4.22E-36 | -0.6209243 | 0.298 | 0.49  | 5.98E-32 | B cells | Tnfaip3   |
| 4.40E-36 | -0.4452568 | 0.033 | 0.148 | 6.23E-32 | B cells | Cdk6      |
| 4.66E-36 | -0.4472724 | 0.2   | 0.388 | 6.60E-32 | B cells | Sec11a    |
| 5.17E-36 | -0.5505758 | 0.443 | 0.596 | 7.31E-32 | B cells | Atp5c1    |
| 5.51E-36 | 0.64345795 | 0.321 | 0.206 | 7.80E-32 | B cells | Fli1      |
| 5.63E-36 | 0.27458611 | 0.947 | 0.814 | 7.96E-32 | B cells | Rpl3      |
| 6.15E-36 | -0.3476752 | 0.028 | 0.139 | 8.70E-32 | B cells | Pea15a    |
| 6.39E-36 | -0.4182955 | 0.159 | 0.334 | 9.04E-32 | B cells | Pdcd6     |
| 7.85E-36 | 0.51413279 | 0.433 | 0.317 | 1.11E-31 | B cells | Polr2a    |
| 8.15E-36 | -0.4663861 | 0.188 | 0.372 | 1.15E-31 | B cells | Timm10b   |
| 8.28E-36 | 0.54886359 | 0.177 | 0.08  | 1.17E-31 | B cells | Syvn1     |
| 9.08E-36 | -0.4441878 | 0.011 | 0.107 | 1.28E-31 | B cells | Abcb1b    |
| 9.75E-36 | -0.535918  | 0.075 | 0.212 | 1.38E-31 | B cells | Serpina3g |
| 1.01E-35 | -0.4921728 | 0.016 | 0.116 | 1.44E-31 | B cells | Oasl2     |
| 1.11E-35 | -0.3568712 | 0.13  | 0.296 | 1.57E-31 | B cells | Mrpl18    |
| 1.38E-35 | -0.4255526 | 0.166 | 0.342 | 1.95E-31 | B cells | Mrpl4     |
| 1.78E-35 | -0.4346122 | 0.036 | 0.15  | 2.51E-31 | B cells | Notch1    |
| 1.99E-35 | 0.669893   | 0.353 | 0.238 | 2.81E-31 | B cells | Tob2      |
| 2.01E-35 | -0.5662376 | 0.021 | 0.124 | 2.85E-31 | B cells | Slamf9    |
| 2.22E-35 | -0.4922971 | 0.179 | 0.356 | 3.14E-31 | B cells | Ccnd3     |
| 2.39E-35 | 0.32952646 | 0.867 | 0.776 | 3.38E-31 | B cells | Sub1      |
| 2.52E-35 | -0.3624107 | 0.112 | 0.27  | 3.56E-31 | B cells | Mrpl42    |
| 2.86E-35 | 0.4314872  | 0.797 | 0.723 | 4.06E-31 | B cells | Ier2      |
| 3.28E-35 | -0.4634937 | 0.016 | 0.115 | 4.64E-31 | B cells | Ipcef1    |
| 3.52E-35 | -0.5186622 | 0.379 | 0.561 | 4.98E-31 | B cells | H2afj     |
| 3.74E-35 | -0.5329359 | 0.036 | 0.15  | 5.30E-31 | B cells | Cdc42ep3  |
| 3.95E-35 | -0.3713102 | 0.081 | 0.222 | 5.59E-31 | B cells | Nans      |
| 5.41E-35 | -0.5129611 | 0.342 | 0.52  | 7.65E-31 | B cells | Cox7b     |
| 5.75E-35 | -0.3605434 | 0.013 | 0.11  | 8.13E-31 | B cells | Adssl1    |
| 7.41E-35 | 0.27890119 | 0.956 | 0.819 | 1.05E-30 | B cells | Rpl15     |
| 1.20E-34 | 0.56286526 | 0.228 | 0.122 | 1.70E-30 | B cells | Rnf145    |
| 1.45E-34 | 0.49376784 | 0.136 | 0.052 | 2.05E-30 | B cells | Pik3ip1   |
| 1.54E-34 | -0.4020466 | 0.158 | 0.332 | 2.18E-30 | B cells | Ndufa8    |
| 1.57E-34 | -0.3587004 | 0.078 | 0.217 | 2.22E-30 | B cells | Yipf1     |
| 1.61E-34 | -0.4101184 | 0.021 | 0.123 | 2.28E-30 | B cells | Rab19     |
| 1.93E-34 | -0.4277016 | 0.014 | 0.11  | 2.74E-30 | B cells | Pde4d     |
| 2.23E-34 | -0.4033487 | 0.171 | 0.346 | 3.16E-30 | B cells | Nt5c      |
| 2.69E-34 | -0.4945453 | 0.176 | 0.348 | 3.81E-30 | B cells | Pgk1      |
| 2.80E-34 | -0.4842648 | 0.264 | 0.458 | 3.97E-30 | B cells | Apbb1ip   |
| 3.22E-34 | -0.4853232 | 0.225 | 0.406 | 4.55E-30 | B cells | Rnasek    |
| 4.14E-34 | -0.3585409 | 0.129 | 0.292 | 5.86E-30 | B cells | Ccdc124   |
| 4.20E-34 | -0.3132615 | 0.043 | 0.16  | 5.95E-30 | B cells | Bak1      |
| 4.23E-34 | -0.6730922 | 0.216 | 0.373 | 5.99E-30 | B cells | Gimap4    |

|          |            |       |       |          |         |           |
|----------|------------|-------|-------|----------|---------|-----------|
| 4.28E-34 | -0.4146588 | 0.039 | 0.152 | 6.06E-30 | B cells | Mgst2     |
| 4.29E-34 | 0.55087945 | 0.233 | 0.126 | 6.07E-30 | B cells | Nfkb2     |
| 4.43E-34 | -0.5183201 | 0.26  | 0.443 | 6.27E-30 | B cells | Slfn2     |
| 4.60E-34 | -0.507342  | 0.262 | 0.44  | 6.51E-30 | B cells | Ndufb8    |
| 4.68E-34 | -0.4004031 | 0.134 | 0.296 | 6.62E-30 | B cells | Rexo2     |
| 4.87E-34 | -0.4139217 | 0.133 | 0.295 | 6.89E-30 | B cells | Gltp      |
| 5.69E-34 | -0.42517   | 0.019 | 0.118 | 8.06E-30 | B cells | Syt11     |
| 5.71E-34 | -0.3996088 | 0.106 | 0.255 | 8.09E-30 | B cells | Ift20     |
| 5.81E-34 | -0.3087626 | 0.089 | 0.233 | 8.23E-30 | B cells | Commd7    |
| 6.55E-34 | -0.3307236 | 0.064 | 0.193 | 9.27E-30 | B cells | Gusb      |
| 1.29E-33 | 0.45584299 | 0.126 | 0.047 | 1.82E-29 | B cells | Abca1     |
| 1.33E-33 | 0.51092611 | 0.572 | 0.485 | 1.89E-29 | B cells | Srsf3     |
| 2.03E-33 | 0.52157169 | 0.158 | 0.068 | 2.87E-29 | B cells | Ephx1     |
| 2.27E-33 | -0.5964172 | 0.133 | 0.285 | 3.21E-29 | B cells | Irf7      |
| 2.52E-33 | -0.4281531 | 0.17  | 0.344 | 3.57E-29 | B cells | Ndufv2    |
| 3.53E-33 | -0.6225596 | 0.027 | 0.129 | 5.00E-29 | B cells | Pltp      |
| 3.83E-33 | -0.4455506 | 0.224 | 0.407 | 5.41E-29 | B cells | Uqcr11    |
| 3.99E-33 | 0.49420247 | 0.167 | 0.076 | 5.65E-29 | B cells | Ctso      |
| 4.58E-33 | -0.3675538 | 0.119 | 0.273 | 6.48E-29 | B cells | Fam173a   |
| 4.97E-33 | -0.5010625 | 0.56  | 0.661 | 7.04E-29 | B cells | Cox5b     |
| 5.03E-33 | -0.3383174 | 0.023 | 0.123 | 7.11E-29 | B cells | Rap2b     |
| 5.80E-33 | -0.4066352 | 0.053 | 0.172 | 8.21E-29 | B cells | Il6ra     |
| 8.21E-33 | -0.4017215 | 0.078 | 0.211 | 1.16E-28 | B cells | Arhgap9   |
| 9.61E-33 | -0.4058832 | 0.034 | 0.14  | 1.36E-28 | B cells | Plscr1    |
| 9.83E-33 | -0.2621169 | 0.041 | 0.154 | 1.39E-28 | B cells | Ccs       |
| 1.32E-32 | 0.44223911 | 0.104 | 0.035 | 1.87E-28 | B cells | N4bp2     |
| 2.17E-32 | -0.6803801 | 0.023 | 0.119 | 3.07E-28 | B cells | Lef1      |
| 2.27E-32 | -0.6282775 | 0.167 | 0.324 | 3.22E-28 | B cells | Socs3     |
| 3.16E-32 | 0.59373045 | 0.225 | 0.125 | 4.47E-28 | B cells | Map2k1    |
| 3.17E-32 | 0.28435646 | 0.928 | 0.795 | 4.49E-28 | B cells | Rpl14     |
| 3.20E-32 | -0.4172634 | 0.071 | 0.199 | 4.54E-28 | B cells | Nab1      |
| 3.38E-32 | -0.4959019 | 0.061 | 0.182 | 4.79E-28 | B cells | Tcirg1    |
| 3.53E-32 | -0.2888719 | 0.105 | 0.252 | 5.00E-28 | B cells | Tomm5     |
| 4.04E-32 | -0.2934845 | 0.035 | 0.142 | 5.72E-28 | B cells | Rnpep     |
| 4.36E-32 | -0.548971  | 0.061 | 0.181 | 6.17E-28 | B cells | Inpp4b    |
| 4.53E-32 | -0.481588  | 0.632 | 0.72  | 6.41E-28 | B cells | Gng5      |
| 5.34E-32 | -0.4713668 | 0.28  | 0.457 | 7.56E-28 | B cells | Smdt1     |
| 6.47E-32 | -0.4313599 | 0.036 | 0.142 | 9.15E-28 | B cells | Naaa      |
| 6.71E-32 | -0.3858637 | 0.046 | 0.159 | 9.50E-28 | B cells | Errfi1    |
| 6.88E-32 | 0.27318616 | 0.933 | 0.81  | 9.75E-28 | B cells | Rpl10-ps3 |
| 7.28E-32 | -0.2887305 | 0.038 | 0.147 | 1.03E-27 | B cells | Cnpy2     |
| 7.36E-32 | -0.3151682 | 0.03  | 0.134 | 1.04E-27 | B cells | Gmnn      |
| 7.74E-32 | 0.60328383 | 0.223 | 0.125 | 1.10E-27 | B cells | Ubqln1    |
| 7.97E-32 | 0.62064352 | 0.284 | 0.177 | 1.13E-27 | B cells | Phip      |
| 8.22E-32 | -0.3248853 | 0.067 | 0.193 | 1.16E-27 | B cells | Gsdmd     |
| 8.76E-32 | -0.407229  | 0.039 | 0.146 | 1.24E-27 | B cells | Cyfp1     |
| 9.31E-32 | -0.445165  | 0.18  | 0.347 | 1.32E-27 | B cells | Atp1a1    |
| 1.06E-31 | -0.4854467 | 0.222 | 0.402 | 1.49E-27 | B cells |           |

7-Sep



|          |            |       |       |          |         |             |
|----------|------------|-------|-------|----------|---------|-------------|
| 1.12E-31 | -0.2861115 | 0.045 | 0.158 | 1.59E-27 | B cells | Sap30       |
| 1.48E-31 | -0.3940054 | 0.104 | 0.246 | 2.10E-27 | B cells | Srpk1       |
| 1.55E-31 | -0.2983288 | 0.055 | 0.173 | 2.19E-27 | B cells | 2210016F16F |
| 1.65E-31 | -0.4160276 | 0.052 | 0.167 | 2.33E-27 | B cells | Ttc39b      |
| 1.99E-31 | -0.4038072 | 0.029 | 0.128 | 2.81E-27 | B cells | Gng12       |
| 1.99E-31 | -0.3256704 | 0.065 | 0.189 | 2.82E-27 | B cells | Sh3bp1      |
| 2.15E-31 | -0.5088928 | 0.354 | 0.517 | 3.04E-27 | B cells | Psma2       |
| 2.17E-31 | 0.53532993 | 0.173 | 0.083 | 3.07E-27 | B cells | Mgrn1       |
| 2.63E-31 | -0.4698345 | 0.067 | 0.188 | 3.73E-27 | B cells | Pgd         |
| 2.78E-31 | -0.4030361 | 0.174 | 0.341 | 3.93E-27 | B cells | Ssr2        |
| 2.92E-31 | -0.3358503 | 0.04  | 0.149 | 4.14E-27 | B cells | Ube2l6      |
| 3.16E-31 | -0.2648842 | 0.047 | 0.161 | 4.47E-27 | B cells | Cltb        |
| 4.35E-31 | -0.3272195 | 0.101 | 0.242 | 6.16E-27 | B cells | Polr2c      |
| 4.52E-31 | 0.46683579 | 0.146 | 0.063 | 6.40E-27 | B cells | Cdc25b      |
| 5.18E-31 | -0.3275587 | 0.037 | 0.141 | 7.34E-27 | B cells | Ehbp1l1     |
| 5.58E-31 | -0.3290101 | 0.079 | 0.209 | 7.90E-27 | B cells | Borcs8      |
| 5.95E-31 | 0.4143183  | 0.124 | 0.047 | 8.42E-27 | B cells | Cd200       |
| 6.02E-31 | 0.40864295 | 0.434 | 0.304 | 8.52E-27 | B cells | Ikzf3       |
| 7.38E-31 | 0.61884815 | 0.226 | 0.128 | 1.05E-26 | B cells | Oat         |
| 8.03E-31 | -0.2515948 | 0.044 | 0.154 | 1.14E-26 | B cells | Tpgs1       |
| 9.55E-31 | -0.4928475 | 0.357 | 0.523 | 1.35E-26 | B cells | Uqcrq       |
| 1.00E-30 | -0.4293395 | 0.209 | 0.378 | 1.42E-26 | B cells | Ndufc2      |
| 1.06E-30 | -0.3519505 | 0.971 | 0.889 | 1.50E-26 | B cells | Ppia        |
| 1.44E-30 | -0.3306775 | 0.076 | 0.202 | 2.04E-26 | B cells | Tmem126a    |
| 1.46E-30 | -0.5080689 | 0.585 | 0.691 | 2.07E-26 | B cells | Tmbim6      |
| 1.47E-30 | -0.3234151 | 0.042 | 0.149 | 2.07E-26 | B cells | Vcpkmt      |
| 1.63E-30 | -0.379315  | 0.058 | 0.174 | 2.30E-26 | B cells | Pxn         |
| 1.96E-30 | 0.56737841 | 0.336 | 0.23  | 2.78E-26 | B cells | Apobec3     |
| 1.99E-30 | -0.4478608 | 0.23  | 0.405 | 2.82E-26 | B cells | Calm3       |
| 2.06E-30 | -0.4070522 | 0.026 | 0.121 | 2.92E-26 | B cells | Lpcat2      |
| 2.14E-30 | -0.349332  | 0.014 | 0.1   | 3.03E-26 | B cells | Hk2         |
| 2.34E-30 | -0.3238419 | 0.088 | 0.221 | 3.31E-26 | B cells | Emc4        |
| 2.43E-30 | -0.312788  | 0.037 | 0.142 | 3.45E-26 | B cells | Dtx3l       |
| 2.46E-30 | 0.50312056 | 0.294 | 0.184 | 3.49E-26 | B cells | Malt1       |
| 2.70E-30 | -0.3011662 | 0.075 | 0.201 | 3.83E-26 | B cells | Zbtb80s     |
| 3.86E-30 | -0.3122639 | 0.162 | 0.327 | 5.47E-26 | B cells | Eif6        |
| 4.23E-30 | -0.3829369 | 0.093 | 0.226 | 5.99E-26 | B cells | Lasp1       |
| 4.48E-30 | -0.3547293 | 0.095 | 0.228 | 6.35E-26 | B cells | Dynlt1b     |
| 5.34E-30 | -0.3172506 | 0.113 | 0.257 | 7.56E-26 | B cells | Tex261      |
| 5.39E-30 | 0.49360714 | 0.167 | 0.081 | 7.63E-26 | B cells | Farsb       |
| 5.69E-30 | -0.3375078 | 0.065 | 0.184 | 8.06E-26 | B cells | Surf1       |
| 5.70E-30 | -0.4766814 | 0.233 | 0.4   | 8.06E-26 | B cells | Atpif1      |
| 9.20E-30 | 0.46759894 | 0.148 | 0.067 | 1.30E-25 | B cells | Traf5       |
| 9.22E-30 | -0.4580719 | 0.071 | 0.19  | 1.30E-25 | B cells | Skap2       |
| 1.00E-29 | 0.50981674 | 0.173 | 0.084 | 1.42E-25 | B cells | Myo1e       |
| 1.02E-29 | 0.31728349 | 0.719 | 0.629 | 1.44E-25 | B cells | Hspa5       |
| 1.03E-29 | -0.7740271 | 0.258 | 0.413 | 1.45E-25 | B cells | Gadd45b     |
| 1.08E-29 | 0.40300118 | 0.569 | 0.477 | 1.52E-25 | B cells | Eif4g2      |

|          |            |       |       |          |         |             |
|----------|------------|-------|-------|----------|---------|-------------|
| 1.15E-29 | 0.66435363 | 0.257 | 0.161 | 1.62E-25 | B cells | Gorasp2     |
| 1.37E-29 | -0.3616349 | 0.024 | 0.116 | 1.94E-25 | B cells | Znrf1       |
| 1.39E-29 | -0.4794176 | 0.295 | 0.471 | 1.97E-25 | B cells | Bsg         |
| 1.83E-29 | -0.3654556 | 0.048 | 0.156 | 2.59E-25 | B cells | Agpat3      |
| 1.84E-29 | 0.48323435 | 0.148 | 0.066 | 2.61E-25 | B cells | Ciita       |
| 2.07E-29 | -0.4166341 | 0.044 | 0.15  | 2.93E-25 | B cells | Gbp4        |
| 2.27E-29 | -0.281441  | 0.043 | 0.149 | 3.21E-25 | B cells | Tapbpl      |
| 2.51E-29 | -0.4228602 | 0.088 | 0.215 | 3.55E-25 | B cells | Vmp1        |
| 2.74E-29 | 0.61982778 | 0.292 | 0.193 | 3.88E-25 | B cells | Stip1       |
| 2.75E-29 | -0.3449966 | 0.084 | 0.211 | 3.89E-25 | B cells | Siva1       |
| 2.83E-29 | -0.4397318 | 0.278 | 0.454 | 4.01E-25 | B cells | Ndufb9      |
| 2.91E-29 | -0.2942583 | 0.13  | 0.281 | 4.12E-25 | B cells | Al413582    |
| 2.92E-29 | -0.4324831 | 0.089 | 0.215 | 4.13E-25 | B cells | Ptpn11      |
| 3.34E-29 | -0.3185213 | 0.057 | 0.171 | 4.72E-25 | B cells | Ciapin1     |
| 3.55E-29 | 0.57098287 | 0.211 | 0.118 | 5.02E-25 | B cells | Rfk         |
| 3.79E-29 | -0.3192513 | 0.13  | 0.279 | 5.37E-25 | B cells | Hmox2       |
| 4.28E-29 | -0.303442  | 0.124 | 0.272 | 6.06E-25 | B cells | Pdap1       |
| 5.43E-29 | 0.51401544 | 0.18  | 0.092 | 7.69E-25 | B cells | Rcc2        |
| 6.52E-29 | 0.55794345 | 0.192 | 0.103 | 9.23E-25 | B cells | Pmf1        |
| 7.77E-29 | -0.3212478 | 0.047 | 0.154 | 1.10E-24 | B cells | Mapkapk3    |
| 7.90E-29 | -0.2968945 | 0.018 | 0.104 | 1.12E-24 | B cells | Gsap        |
| 7.93E-29 | -0.3114959 | 0.109 | 0.248 | 1.12E-24 | B cells | Snpc5       |
| 8.01E-29 | 0.47979353 | 0.184 | 0.095 | 1.13E-24 | B cells | Card11      |
| 8.86E-29 | 0.47607274 | 0.277 | 0.172 | 1.25E-24 | B cells | Sptbn1      |
| 9.04E-29 | -0.3601163 | 0.09  | 0.218 | 1.28E-24 | B cells | Krcc1       |
| 9.89E-29 | -0.3773248 | 0.198 | 0.366 | 1.40E-24 | B cells | Ube2l3      |
| 1.00E-28 | -0.2962901 | 0.017 | 0.102 | 1.42E-24 | B cells | Inpp1       |
| 1.02E-28 | -0.2571632 | 0.029 | 0.124 | 1.44E-24 | B cells | 3830406C13f |
| 1.15E-28 | -0.4671925 | 0.228 | 0.392 | 1.63E-24 | B cells | Rps27l      |
| 1.16E-28 | -0.3597297 | 0.183 | 0.349 | 1.64E-24 | B cells | Dnajc3      |
| 1.18E-28 | -0.3979078 | 0.035 | 0.132 | 1.66E-24 | B cells | Fkbp5       |
| 1.19E-28 | -0.4322245 | 0.176 | 0.332 | 1.69E-24 | B cells | Pttg1       |
| 1.32E-28 | -0.3439821 | 0.105 | 0.24  | 1.87E-24 | B cells | Nutf2       |
| 1.41E-28 | -0.5343598 | 0.132 | 0.269 | 1.99E-24 | B cells | Prkca       |
| 1.43E-28 | -0.4192185 | 0.083 | 0.207 | 2.02E-24 | B cells | Nrip1       |
| 1.46E-28 | 0.55148127 | 0.263 | 0.163 | 2.07E-24 | B cells | Pten        |
| 1.66E-28 | -0.3849519 | 0.069 | 0.185 | 2.35E-24 | B cells | Chd9        |
| 1.95E-28 | -0.4399665 | 0.078 | 0.196 | 2.76E-24 | B cells | Rassf4      |
| 2.14E-28 | -0.3734761 | 0.169 | 0.326 | 3.03E-24 | B cells | Ralbp1      |
| 2.15E-28 | -0.2747615 | 0.11  | 0.249 | 3.05E-24 | B cells | Mcts1       |
| 2.20E-28 | -0.5746183 | 0.018 | 0.101 | 3.11E-24 | B cells | Top2a       |
| 2.87E-28 | -0.3118584 | 0.026 | 0.117 | 4.06E-24 | B cells | Galnt2      |
| 2.97E-28 | -0.3330731 | 0.041 | 0.141 | 4.20E-24 | B cells | Slk         |
| 3.10E-28 | -0.2796931 | 0.134 | 0.281 | 4.39E-24 | B cells | Mrpl57      |
| 3.11E-28 | 0.3530582  | 0.756 | 0.637 | 4.40E-24 | B cells | Rpl10       |
| 3.40E-28 | -0.2714937 | 0.057 | 0.169 | 4.81E-24 | B cells | Med8        |
| 3.53E-28 | -0.404098  | 0.182 | 0.339 | 4.99E-24 | B cells | Anxa6       |
| 4.00E-28 | -0.4250821 | 0.313 | 0.486 | 5.66E-24 | B cells | Mdh2        |

|          |            |       |       |          |         |          |
|----------|------------|-------|-------|----------|---------|----------|
| 4.30E-28 | -0.4759702 | 0.458 | 0.598 | 6.09E-24 | B cells | Gnai2    |
| 4.59E-28 | -0.4034539 | 0.04  | 0.138 | 6.49E-24 | B cells | Utrn     |
| 4.72E-28 | -0.3083354 | 0.018 | 0.101 | 6.68E-24 | B cells | Rasa4    |
| 5.12E-28 | -0.280197  | 0.027 | 0.119 | 7.25E-24 | B cells | Naga     |
| 5.66E-28 | -0.3424831 | 0.165 | 0.321 | 8.01E-24 | B cells | Cops6    |
| 5.80E-28 | -0.2713225 | 0.062 | 0.175 | 8.21E-24 | B cells | Itgb1bp1 |
| 5.97E-28 | 0.46442153 | 0.488 | 0.405 | 8.45E-24 | B cells | Ube2d2a  |
| 6.33E-28 | -0.3921507 | 0.048 | 0.151 | 8.96E-24 | B cells | Gm19585  |
| 6.35E-28 | 0.55910604 | 0.208 | 0.117 | 8.99E-24 | B cells | Siah2    |
| 8.78E-28 | -0.353531  | 0.065 | 0.178 | 1.24E-23 | B cells | Casp3    |
| 9.46E-28 | -0.399301  | 0.255 | 0.425 | 1.34E-23 | B cells | Tecr     |
| 1.02E-27 | -0.3385488 | 0.183 | 0.346 | 1.44E-23 | B cells | Mlf2     |
| 1.35E-27 | 0.56141661 | 0.237 | 0.142 | 1.91E-23 | B cells | Baz2b    |
| 1.41E-27 | -0.5054014 | 0.395 | 0.553 | 2.00E-23 | B cells | Rhog     |
| 1.46E-27 | -0.4935167 | 0.235 | 0.387 | 2.07E-23 | B cells | Ctsa     |
| 1.62E-27 | -0.3901923 | 0.046 | 0.147 | 2.29E-23 | B cells | Mmd      |
| 1.63E-27 | -0.5565597 | 0.277 | 0.445 | 2.31E-23 | B cells | Stat3    |
| 1.67E-27 | -0.4616278 | 0.239 | 0.404 | 2.37E-23 | B cells | H2-T22   |
| 1.93E-27 | -0.4602737 | 0.113 | 0.243 | 2.74E-23 | B cells | Lnpep    |
| 2.52E-27 | -0.3299225 | 0.113 | 0.248 | 3.56E-23 | B cells | Mrps36   |
| 2.72E-27 | -0.2534107 | 0.04  | 0.138 | 3.85E-23 | B cells | Echs1    |
| 2.74E-27 | -0.3259022 | 0.039 | 0.136 | 3.88E-23 | B cells | Hk1      |
| 3.23E-27 | 0.57218843 | 0.261 | 0.165 | 4.57E-23 | B cells | Grap     |
| 3.31E-27 | -0.2871333 | 0.089 | 0.213 | 4.69E-23 | B cells | Zmat5    |
| 3.71E-27 | -0.5670167 | 0.321 | 0.486 | 5.25E-23 | B cells | Pdia3    |
| 3.86E-27 | -0.2871227 | 0.117 | 0.254 | 5.47E-23 | B cells | Acaa1a   |
| 4.06E-27 | -0.4881485 | 0.442 | 0.597 | 5.75E-23 | B cells | Gpx4     |
| 4.15E-27 | -0.3048102 | 0.055 | 0.161 | 5.87E-23 | B cells | Dstn     |
| 4.57E-27 | -0.3176705 | 0.135 | 0.279 | 6.47E-23 | B cells | Lamtor5  |
| 4.71E-27 | -0.4317891 | 0.083 | 0.2   | 6.66E-23 | B cells | Trafd1   |
| 4.88E-27 | 0.40597289 | 0.108 | 0.041 | 6.90E-23 | B cells | Fam214a  |
| 4.93E-27 | -0.4434593 | 0.166 | 0.314 | 6.97E-23 | B cells | Ppp1r12a |
| 5.40E-27 | -0.3741058 | 0.178 | 0.335 | 7.64E-23 | B cells | Psma5    |
| 5.70E-27 | -0.3123763 | 0.068 | 0.181 | 8.06E-23 | B cells | Cflar    |
| 5.83E-27 | -0.3107844 | 0.034 | 0.127 | 8.25E-23 | B cells | Ppp1r9b  |
| 5.91E-27 | -0.2948446 | 0.128 | 0.268 | 8.37E-23 | B cells | Ssna1    |
| 7.38E-27 | 0.51425073 | 0.161 | 0.08  | 1.04E-22 | B cells | Trim11   |
| 8.23E-27 | -0.4252881 | 0.044 | 0.142 | 1.17E-22 | B cells | Irgm1    |
| 8.47E-27 | -0.3541985 | 0.068 | 0.179 | 1.20E-22 | B cells | Myd88    |
| 1.02E-26 | -0.4787278 | 0.562 | 0.647 | 1.45E-22 | B cells | Atp5d    |
| 1.17E-26 | -0.2746982 | 0.043 | 0.142 | 1.66E-22 | B cells | Lman1    |
| 1.26E-26 | -0.430014  | 0.231 | 0.395 | 1.78E-22 | B cells | Rbms1    |
| 1.27E-26 | -0.4410713 | 0.115 | 0.244 | 1.80E-22 | B cells | Cast     |
| 1.38E-26 | 0.4978499  | 0.168 | 0.085 | 1.96E-22 | B cells | Prkd2    |
| 1.43E-26 | -0.4887469 | 0.103 | 0.225 | 2.02E-22 | B cells | Lamp2    |
| 1.43E-26 | -0.3633906 | 0.098 | 0.221 | 2.02E-22 | B cells | Pip4k2a  |
| 1.47E-26 | -0.3594719 | 0.153 | 0.3   | 2.08E-22 | B cells | Sugt1    |
| 1.48E-26 | -0.4557411 | 0.293 | 0.454 | 2.09E-22 | B cells | Psmb5    |

|          |            |       |       |          |         |             |
|----------|------------|-------|-------|----------|---------|-------------|
| 2.03E-26 | -0.2543642 | 0.084 | 0.204 | 2.87E-22 | B cells | Mydgf       |
| 2.21E-26 | -0.2975174 | 0.176 | 0.333 | 3.13E-22 | B cells | Hsbp1       |
| 2.31E-26 | -0.3408879 | 0.036 | 0.129 | 3.27E-22 | B cells | Txnrd1      |
| 2.31E-26 | 0.64024505 | 0.312 | 0.208 | 3.28E-22 | B cells | Nfkbid      |
| 2.36E-26 | -0.2705608 | 0.114 | 0.249 | 3.33E-22 | B cells | Twf2        |
| 2.41E-26 | 0.5158176  | 0.201 | 0.113 | 3.41E-22 | B cells | Map3k1      |
| 3.12E-26 | 0.32144297 | 0.113 | 0.044 | 4.42E-22 | B cells | Rnf144a     |
| 3.13E-26 | -0.2845721 | 0.06  | 0.166 | 4.43E-22 | B cells | Flt3l       |
| 3.50E-26 | -0.3414438 | 0.047 | 0.146 | 4.95E-22 | B cells | N4bp1       |
| 3.53E-26 | -0.3386893 | 0.134 | 0.274 | 5.00E-22 | B cells | Mrps15      |
| 3.73E-26 | 0.44905556 | 0.151 | 0.072 | 5.28E-22 | B cells | Dnajb4      |
| 3.85E-26 | -0.2891183 | 0.072 | 0.185 | 5.45E-22 | B cells | Mthfsl      |
| 3.97E-26 | 0.50909096 | 0.156 | 0.077 | 5.62E-22 | B cells | Sh2b3       |
| 4.39E-26 | -0.3569072 | 0.198 | 0.36  | 6.21E-22 | B cells | Psmd4       |
| 4.78E-26 | -0.2830195 | 0.157 | 0.306 | 6.77E-22 | B cells | Eif4e2      |
| 5.06E-26 | -0.3374739 | 0.11  | 0.24  | 7.16E-22 | B cells | Bnip2       |
| 5.69E-26 | 0.4653059  | 0.351 | 0.25  | 8.06E-22 | B cells | Sik1        |
| 6.17E-26 | 0.48808967 | 0.475 | 0.391 | 8.74E-22 | B cells | Brd2        |
| 7.22E-26 | 0.77978906 | 0.567 | 0.473 | 1.02E-21 | B cells | Hspa1b      |
| 7.82E-26 | -0.5109588 | 0.17  | 0.309 | 1.11E-21 | B cells | Tap1        |
| 8.16E-26 | -0.4467737 | 0.138 | 0.272 | 1.15E-21 | B cells | Smc4        |
| 8.17E-26 | -0.2647806 | 0.13  | 0.269 | 1.16E-21 | B cells | Hcfc1r1     |
| 1.03E-25 | -0.2508041 | 0.087 | 0.206 | 1.46E-21 | B cells | Dctn2       |
| 1.14E-25 | 0.47143502 | 0.144 | 0.069 | 1.62E-21 | B cells | Cse1l       |
| 1.18E-25 | -0.2783535 | 0.155 | 0.305 | 1.67E-21 | B cells | Mrpl20      |
| 1.19E-25 | -0.2576547 | 0.053 | 0.154 | 1.68E-21 | B cells | Dhrs1       |
| 1.20E-25 | 0.33721723 | 0.755 | 0.646 | 1.70E-21 | B cells | Rpl22l1     |
| 1.46E-25 | -0.4803232 | 0.133 | 0.262 | 2.07E-21 | B cells | Slamf7      |
| 1.47E-25 | -0.273543  | 0.151 | 0.297 | 2.08E-21 | B cells | Aimp1       |
| 1.57E-25 | -0.2686594 | 0.103 | 0.229 | 2.22E-21 | B cells | Mrpl14      |
| 1.85E-25 | 0.44869996 | 0.191 | 0.105 | 2.62E-21 | B cells | Sesn3       |
| 1.87E-25 | -0.2777367 | 0.023 | 0.105 | 2.64E-21 | B cells | Vamp5       |
| 1.90E-25 | 0.36050229 | 0.105 | 0.041 | 2.69E-21 | B cells | Tfrc        |
| 2.07E-25 | 0.27645846 | 0.963 | 0.874 | 2.94E-21 | B cells | Hsp90ab1    |
| 2.21E-25 | -0.6304952 | 0.608 | 0.714 | 3.13E-21 | B cells | Lcp1        |
| 2.38E-25 | -0.3511287 | 0.212 | 0.374 | 3.37E-21 | B cells | 1810058I24R |
| 2.56E-25 | 0.500613   | 0.199 | 0.114 | 3.62E-21 | B cells | Rftn1       |
| 2.58E-25 | -0.3307769 | 0.186 | 0.344 | 3.65E-21 | B cells | Psma6       |
| 2.64E-25 | 0.41139585 | 0.351 | 0.252 | 3.74E-21 | B cells | Ddx6        |
| 3.28E-25 | -0.3514406 | 0.027 | 0.11  | 4.64E-21 | B cells | Ogfrl1      |
| 3.66E-25 | 0.46010002 | 0.173 | 0.092 | 5.19E-21 | B cells | Rere        |
| 3.83E-25 | 0.43821956 | 0.385 | 0.281 | 5.42E-21 | B cells | Gpcpd1      |
| 4.27E-25 | -0.4334149 | 0.31  | 0.467 | 6.04E-21 | B cells | Psmb2       |
| 4.72E-25 | -0.283078  | 0.061 | 0.164 | 6.68E-21 | B cells | Casp1       |
| 5.34E-25 | -0.324478  | 0.056 | 0.156 | 7.56E-21 | B cells | Ier5l       |
| 5.63E-25 | -0.2595636 | 0.029 | 0.113 | 7.98E-21 | B cells | Dpysl2      |
| 6.00E-25 | -0.3182219 | 0.145 | 0.284 | 8.49E-21 | B cells | Tpst2       |
| 6.12E-25 | 0.48947292 | 0.281 | 0.185 | 8.66E-21 | B cells | Mef2d       |

|          |            |       |       |          |         |             |
|----------|------------|-------|-------|----------|---------|-------------|
| 6.33E-25 | 0.49029089 | 0.202 | 0.118 | 8.96E-21 | B cells | Cat         |
| 6.50E-25 | -0.4162335 | 0.221 | 0.375 | 9.19E-21 | B cells | Glud1       |
| 6.73E-25 | 0.37200396 | 0.3   | 0.198 | 9.53E-21 | B cells | Tonsl       |
| 6.89E-25 | -0.2832797 | 0.037 | 0.126 | 9.75E-21 | B cells | Mapk3       |
| 6.97E-25 | 0.52056616 | 0.211 | 0.124 | 9.86E-21 | B cells | Ivns1abp    |
| 7.09E-25 | -0.2945093 | 0.051 | 0.149 | 1.00E-20 | B cells | Dynll2      |
| 7.37E-25 | -0.2605131 | 0.099 | 0.221 | 1.04E-20 | B cells | Psmb7       |
| 8.02E-25 | 0.58520104 | 0.271 | 0.181 | 1.14E-20 | B cells | Pcmdt1      |
| 8.13E-25 | -0.2756072 | 0.13  | 0.263 | 1.15E-20 | B cells | Naa10       |
| 8.55E-25 | -0.3446391 | 0.209 | 0.368 | 1.21E-20 | B cells | Wdr83os     |
| 1.01E-24 | 0.35825181 | 0.107 | 0.043 | 1.44E-20 | B cells | Slc25a37    |
| 1.08E-24 | -0.3093235 | 0.025 | 0.105 | 1.53E-20 | B cells | Ebi3        |
| 1.25E-24 | 0.49488252 | 0.738 | 0.68  | 1.77E-20 | B cells | Dnaja1      |
| 1.38E-24 | -0.3448467 | 0.96  | 0.941 | 1.95E-20 | B cells | H2-D1       |
| 1.40E-24 | -0.4841202 | 0.926 | 0.929 | 1.97E-20 | B cells | Lars2       |
| 1.46E-24 | -0.2653904 | 0.022 | 0.1   | 2.07E-20 | B cells | Camk2g      |
| 1.64E-24 | -0.578371  | 0.102 | 0.217 | 2.32E-20 | B cells | Cks2        |
| 1.74E-24 | 0.44325829 | 0.12  | 0.053 | 2.46E-20 | B cells | 1110059E24f |
| 1.76E-24 | 0.42551836 | 0.472 | 0.392 | 2.50E-20 | B cells | Ptbp3       |
| 2.09E-24 | -0.4049795 | 0.172 | 0.314 | 2.96E-20 | B cells | Sod2        |
| 2.20E-24 | -0.2940583 | 0.095 | 0.213 | 3.12E-20 | B cells | Fam162a     |
| 2.22E-24 | 0.49877829 | 0.327 | 0.239 | 3.15E-20 | B cells | Wbp2        |
| 2.23E-24 | -0.3450576 | 0.26  | 0.425 | 3.15E-20 | B cells | Ndufa11     |
| 2.44E-24 | -0.2538415 | 0.11  | 0.235 | 3.46E-20 | B cells | Exosc8      |
| 2.73E-24 | -0.2811556 | 0.037 | 0.124 | 3.87E-20 | B cells | Nfic        |
| 3.73E-24 | -0.250145  | 0.138 | 0.275 | 5.28E-20 | B cells | Mvb12a      |
| 3.85E-24 | -0.4258725 | 0.089 | 0.2   | 5.45E-20 | B cells | Itgav       |
| 4.54E-24 | -0.3425105 | 0.027 | 0.108 | 6.42E-20 | B cells | Furin       |
| 4.70E-24 | -0.5197012 | 0.068 | 0.168 | 6.66E-20 | B cells | Nudt4       |
| 4.77E-24 | 0.45697229 | 0.155 | 0.078 | 6.75E-20 | B cells | Tmem163     |
| 4.97E-24 | -0.3750379 | 0.262 | 0.421 | 7.03E-20 | B cells | Bax         |
| 5.94E-24 | 0.56119573 | 0.32  | 0.233 | 8.41E-20 | B cells | Scaf11      |
| 6.05E-24 | 0.4800698  | 0.205 | 0.121 | 8.56E-20 | B cells | Srebfb2     |
| 6.82E-24 | -0.2698398 | 0.123 | 0.252 | 9.66E-20 | B cells | Tmem208     |
| 7.80E-24 | -0.3887566 | 0.081 | 0.19  | 1.10E-19 | B cells | Aplp2       |
| 8.63E-24 | -0.3493438 | 0.23  | 0.392 | 1.22E-19 | B cells | Scp2        |
| 8.66E-24 | -0.3986182 | 0.065 | 0.164 | 1.23E-19 | B cells | Asah1       |
| 9.20E-24 | -0.3647861 | 0.118 | 0.241 | 1.30E-19 | B cells | Traf1       |
| 1.24E-23 | 0.5053143  | 0.191 | 0.11  | 1.75E-19 | B cells | Neu1        |
| 1.45E-23 | 0.53033317 | 0.262 | 0.174 | 2.05E-19 | B cells | Ccm2        |
| 1.45E-23 | -0.3721204 | 0.228 | 0.385 | 2.05E-19 | B cells | Tmem167     |
| 1.46E-23 | 0.47979616 | 0.415 | 0.337 | 2.06E-19 | B cells | Sfpq        |
| 1.49E-23 | -0.4982003 | 0.051 | 0.141 | 2.11E-19 | B cells | Ms4a4a      |
| 1.53E-23 | -0.4974369 | 0.097 | 0.209 | 2.16E-19 | B cells | Phlda1      |
| 1.53E-23 | -0.3061447 | 0.146 | 0.282 | 2.17E-19 | B cells | Ndufs6      |
| 1.87E-23 | -0.4377272 | 0.071 | 0.172 | 2.64E-19 | B cells | 2310001H17f |
| 1.87E-23 | -0.3885107 | 0.203 | 0.348 | 2.65E-19 | B cells | Bin2        |
| 1.88E-23 | -0.2797183 | 0.122 | 0.248 | 2.66E-19 | B cells | Lims1       |

|          |            |       |       |          |         |           |
|----------|------------|-------|-------|----------|---------|-----------|
| 1.89E-23 | -0.4825164 | 0.068 | 0.167 | 2.68E-19 | B cells | Lyst      |
| 1.96E-23 | -0.3935822 | 0.236 | 0.389 | 2.77E-19 | B cells | Psmb4     |
| 2.02E-23 | -0.3864135 | 0.234 | 0.389 | 2.86E-19 | B cells | Ostc      |
| 2.05E-23 | -0.4061937 | 0.256 | 0.405 | 2.90E-19 | B cells | Nme1      |
| 2.56E-23 | -0.3578272 | 0.089 | 0.199 | 3.62E-19 | B cells | Tm6sf1    |
| 2.61E-23 | -0.3170977 | 0.075 | 0.18  | 3.70E-19 | B cells | Trps1     |
| 2.63E-23 | -0.2697283 | 0.047 | 0.138 | 3.72E-19 | B cells | Mvp       |
| 2.72E-23 | -0.436552  | 0.284 | 0.436 | 3.84E-19 | B cells | Ptpn1     |
| 2.90E-23 | 0.27535479 | 0.302 | 0.199 | 4.11E-19 | B cells | Marcks11  |
| 2.94E-23 | -0.2908582 | 0.064 | 0.163 | 4.16E-19 | B cells | Rpa2      |
| 2.98E-23 | -0.3258544 | 0.065 | 0.164 | 4.22E-19 | B cells | Etv6      |
| 3.14E-23 | -0.4660128 | 0.602 | 0.646 | 4.44E-19 | B cells | Nme2      |
| 3.33E-23 | 0.36482025 | 0.463 | 0.37  | 4.71E-19 | B cells | Hmgn2     |
| 3.70E-23 | -0.2768843 | 0.152 | 0.291 | 5.24E-19 | B cells | Aip       |
| 3.86E-23 | -0.3687384 | 0.267 | 0.427 | 5.47E-19 | B cells | Mrps21    |
| 4.14E-23 | 0.49584988 | 0.347 | 0.26  | 5.86E-19 | B cells | Bcl10     |
| 4.50E-23 | -0.4235735 | 0.061 | 0.156 | 6.37E-19 | B cells | Adam19    |
| 4.65E-23 | -0.4480815 | 0.158 | 0.282 | 6.58E-19 | B cells | Gimap5    |
| 6.65E-23 | -0.3146481 | 0.215 | 0.367 | 9.41E-19 | B cells | Mkrn1     |
| 6.74E-23 | -0.2737042 | 0.026 | 0.103 | 9.54E-19 | B cells | Mxi1      |
| 7.26E-23 | -0.3814185 | 0.117 | 0.236 | 1.03E-18 | B cells | Mxd4      |
| 8.27E-23 | -0.2715528 | 0.199 | 0.353 | 1.17E-18 | B cells | Bag1      |
| 8.55E-23 | 0.38103281 | 0.481 | 0.394 | 1.21E-18 | B cells | Clk1      |
| 8.90E-23 | -0.3014376 | 0.15  | 0.283 | 1.26E-18 | B cells | Fundc2    |
| 1.09E-22 | -0.3036293 | 0.026 | 0.103 | 1.54E-18 | B cells | Herc6     |
| 1.17E-22 | -0.3024633 | 0.064 | 0.161 | 1.66E-18 | B cells | Gyg       |
| 1.24E-22 | -0.5301452 | 0.267 | 0.409 | 1.75E-18 | B cells | Flna      |
| 1.36E-22 | -0.2559832 | 0.092 | 0.204 | 1.92E-18 | B cells | Atxn10    |
| 1.46E-22 | -0.3959292 | 0.275 | 0.438 | 2.07E-18 | B cells | Ywhab     |
| 1.49E-22 | -0.3249899 | 0.153 | 0.286 | 2.11E-18 | B cells | Npm3      |
| 1.50E-22 | -0.4516096 | 0.228 | 0.374 | 2.12E-18 | B cells | Atp2b1    |
| 1.61E-22 | -0.2533346 | 0.129 | 0.256 | 2.28E-18 | B cells | Tnfaip8l2 |
| 1.69E-22 | 0.53569491 | 0.169 | 0.093 | 2.39E-18 | B cells | Tbc1d1    |
| 1.71E-22 | -0.3979121 | 0.375 | 0.529 | 2.42E-18 | B cells | Sri       |
| 2.05E-22 | 0.60401756 | 0.298 | 0.211 | 2.90E-18 | B cells | Gm26532   |
| 2.28E-22 | -0.281996  | 0.027 | 0.104 | 3.22E-18 | B cells | Clip1     |
| 2.33E-22 | -0.3364891 | 0.1   | 0.213 | 3.30E-18 | B cells | Tiprl     |
| 2.56E-22 | 0.46561896 | 0.154 | 0.082 | 3.62E-18 | B cells | Cd180     |
| 2.77E-22 | 0.37481531 | 0.111 | 0.049 | 3.92E-18 | B cells | Rrs1      |
| 3.09E-22 | -0.4099915 | 0.091 | 0.196 | 4.37E-18 | B cells | AU020206  |
| 3.87E-22 | -0.2788816 | 0.172 | 0.315 | 5.48E-18 | B cells | Pet100    |
| 4.05E-22 | -0.4108182 | 0.28  | 0.435 | 5.73E-18 | B cells | Spcs2     |
| 4.21E-22 | 0.51513939 | 0.286 | 0.2   | 5.96E-18 | B cells | Bptf      |
| 5.03E-22 | -0.3217897 | 0.1   | 0.211 | 7.13E-18 | B cells | Def6      |
| 5.85E-22 | 0.32382629 | 0.274 | 0.177 | 8.28E-18 | B cells | Kctd12    |
| 6.47E-22 | -0.2741323 | 0.044 | 0.128 | 9.16E-18 | B cells | Fam49a    |
| 7.35E-22 | 0.4890162  | 0.238 | 0.153 | 1.04E-17 | B cells | Pde7a     |
| 8.74E-22 | -0.3851831 | 0.429 | 0.567 | 1.24E-17 | B cells | Atp5f1    |

|          |            |       |       |          |         |          |
|----------|------------|-------|-------|----------|---------|----------|
| 9.21E-22 | 0.38654107 | 0.502 | 0.433 | 1.30E-17 | B cells | Hnrnpab  |
| 9.79E-22 | 0.48188391 | 0.222 | 0.14  | 1.39E-17 | B cells | Rnf44    |
| 1.46E-21 | -0.3896134 | 0.348 | 0.5   | 2.06E-17 | B cells | Nedd8    |
| 1.73E-21 | -0.2632336 | 0.173 | 0.311 | 2.45E-17 | B cells | Cox20    |
| 1.78E-21 | 0.35218516 | 0.122 | 0.057 | 2.52E-17 | B cells | Itp3     |
| 2.06E-21 | 0.46839803 | 0.174 | 0.099 | 2.92E-17 | B cells | Cd40     |
| 2.09E-21 | 0.41721839 | 0.498 | 0.434 | 2.96E-17 | B cells | Srsf2    |
| 2.31E-21 | 0.40384039 | 0.306 | 0.217 | 3.28E-17 | B cells | Per1     |
| 2.89E-21 | -0.2674893 | 0.173 | 0.311 | 4.10E-17 | B cells | Ufc1     |
| 2.90E-21 | -0.4417737 | 0.081 | 0.179 | 4.11E-17 | B cells | Cwc25    |
| 2.96E-21 | -0.40114   | 0.46  | 0.597 | 4.19E-17 | B cells | Atp6v0e  |
| 3.09E-21 | -0.3014216 | 0.209 | 0.357 | 4.37E-17 | B cells | Ssu72    |
| 3.46E-21 | -0.3115594 | 0.09  | 0.195 | 4.90E-17 | B cells | Map2k3   |
| 3.77E-21 | -0.2922873 | 0.165 | 0.297 | 5.34E-17 | B cells | Orai1    |
| 4.15E-21 | -0.3673528 | 0.208 | 0.349 | 5.87E-17 | B cells | Klf13    |
| 4.54E-21 | -0.2918273 | 0.232 | 0.384 | 6.43E-17 | B cells | Txn2     |
| 5.01E-21 | -0.2797351 | 0.144 | 0.27  | 7.09E-17 | B cells | Scamp2   |
| 5.39E-21 | 0.50454599 | 0.273 | 0.193 | 7.63E-17 | B cells | Sipa1    |
| 5.86E-21 | -0.2596936 | 0.096 | 0.204 | 8.29E-17 | B cells | Dctn4    |
| 7.00E-21 | 0.52572635 | 0.342 | 0.262 | 9.91E-17 | B cells | Kras     |
| 7.08E-21 | 0.4487807  | 0.42  | 0.355 | 1.00E-16 | B cells | Paip2    |
| 8.36E-21 | -0.4091938 | 0.447 | 0.571 | 1.18E-16 | B cells | Edf1     |
| 8.38E-21 | 0.39713262 | 0.274 | 0.183 | 1.19E-16 | B cells | Gns      |
| 9.38E-21 | 0.48601026 | 0.261 | 0.179 | 1.33E-16 | B cells | Itsn2    |
| 1.02E-20 | -0.4169972 | 0.044 | 0.125 | 1.44E-16 | B cells | Ccp3     |
| 1.12E-20 | -0.3534207 | 0.284 | 0.437 | 1.58E-16 | B cells | Park7    |
| 1.20E-20 | -0.3555346 | 0.12  | 0.233 | 1.69E-16 | B cells | Itpkb    |
| 1.40E-20 | -0.4924013 | 0.312 | 0.449 | 1.98E-16 | B cells | Tuba1c   |
| 1.59E-20 | 0.44050453 | 0.447 | 0.381 | 2.24E-16 | B cells | Atf4     |
| 1.68E-20 | -0.3310724 | 0.087 | 0.188 | 2.38E-16 | B cells | Slc6a6   |
| 1.92E-20 | 0.3870308  | 0.149 | 0.079 | 2.72E-16 | B cells | Slc12a6  |
| 2.30E-20 | 0.47477329 | 0.164 | 0.093 | 3.26E-16 | B cells | Pafah1b3 |
| 2.55E-20 | -0.3173131 | 0.199 | 0.334 | 3.61E-16 | B cells | Coro1b   |
| 2.86E-20 | 0.41207012 | 0.233 | 0.148 | 4.06E-16 | B cells | Adrb2    |
| 2.87E-20 | -0.3061013 | 0.092 | 0.195 | 4.06E-16 | B cells | Parp14   |
| 2.88E-20 | -0.2723956 | 0.186 | 0.322 | 4.08E-16 | B cells | Mien1    |
| 2.99E-20 | 0.34080625 | 0.565 | 0.501 | 4.23E-16 | B cells | Ncl      |
| 3.21E-20 | -0.2766964 | 0.192 | 0.332 | 4.54E-16 | B cells | Psmc3    |
| 3.28E-20 | -0.3926395 | 0.18  | 0.309 | 4.64E-16 | B cells | Diaph1   |
| 3.64E-20 | 0.37629147 | 0.474 | 0.386 | 5.16E-16 | B cells | Txnip    |
| 3.81E-20 | 0.41670116 | 0.138 | 0.072 | 5.39E-16 | B cells | Slc30a5  |
| 3.85E-20 | -0.2724991 | 0.178 | 0.314 | 5.45E-16 | B cells | Ddost    |
| 3.94E-20 | 0.54439214 | 0.275 | 0.198 | 5.58E-16 | B cells | Fkbp4    |
| 4.19E-20 | -0.2656638 | 0.194 | 0.334 | 5.93E-16 | B cells | Smad1    |
| 4.66E-20 | 0.49985913 | 0.196 | 0.121 | 6.59E-16 | B cells | AI467606 |
| 4.76E-20 | -0.2694297 | 0.174 | 0.307 | 6.74E-16 | B cells | Srp19    |
| 4.90E-20 | -0.2818049 | 0.202 | 0.344 | 6.93E-16 | B cells | Mpc2     |
| 6.92E-20 | -0.3942879 | 0.078 | 0.171 | 9.79E-16 | B cells | Ddit4    |

|          |            |       |       |          |         |          |
|----------|------------|-------|-------|----------|---------|----------|
| 7.89E-20 | 0.34431287 | 0.13  | 0.065 | 1.12E-15 | B cells | Arhgef18 |
| 8.08E-20 | 0.52372293 | 0.177 | 0.105 | 1.14E-15 | B cells | Nsf      |
| 8.38E-20 | 0.30830123 | 0.599 | 0.548 | 1.19E-15 | B cells | Xist     |
| 9.58E-20 | -0.3215955 | 0.102 | 0.204 | 1.36E-15 | B cells | Plec     |
| 1.07E-19 | 0.3630413  | 0.104 | 0.047 | 1.52E-15 | B cells | Trim34a  |
| 1.17E-19 | 0.39041814 | 0.474 | 0.412 | 1.66E-15 | B cells | Hnrnpa1  |
| 1.21E-19 | 0.53305475 | 0.244 | 0.167 | 1.72E-15 | B cells | Gbbp1    |
| 1.24E-19 | 0.55843647 | 0.135 | 0.07  | 1.76E-15 | B cells | Grasp    |
| 1.32E-19 | -0.4095691 | 0.573 | 0.65  | 1.87E-15 | B cells | Eif3h    |
| 1.50E-19 | -0.3805823 | 0.316 | 0.46  | 2.13E-15 | B cells | Uqcr10   |
| 1.84E-19 | 0.34702324 | 0.103 | 0.047 | 2.61E-15 | B cells | Tpst1    |
| 2.44E-19 | 0.40342005 | 0.162 | 0.092 | 3.45E-15 | B cells | Ppp3cc   |
| 3.39E-19 | -0.3412469 | 0.261 | 0.407 | 4.80E-15 | B cells | Swi5     |
| 3.44E-19 | -0.257521  | 0.163 | 0.291 | 4.87E-15 | B cells | Ifi35    |
| 3.49E-19 | 0.36866391 | 0.125 | 0.063 | 4.93E-15 | B cells | Plekhm3  |
| 3.74E-19 | -0.3066468 | 0.246 | 0.391 | 5.29E-15 | B cells | Bloc1s1  |
| 4.58E-19 | 0.47242117 | 0.193 | 0.119 | 6.48E-15 | B cells | Ii16     |
| 4.72E-19 | -0.312168  | 0.29  | 0.44  | 6.68E-15 | B cells | Ndufa1   |
| 5.55E-19 | 0.25713515 | 0.625 | 0.544 | 7.86E-15 | B cells | Rap1b    |
| 6.34E-19 | 0.53265402 | 0.252 | 0.179 | 8.97E-15 | B cells | Bin1     |
| 6.56E-19 | -0.2643658 | 0.07  | 0.158 | 9.29E-15 | B cells | Lta4h    |
| 6.68E-19 | -0.320181  | 0.039 | 0.112 | 9.46E-15 | B cells | Smc2     |
| 6.83E-19 | -0.5106414 | 0.677 | 0.718 | 9.67E-15 | B cells | Lsp1     |
| 8.11E-19 | 0.45256869 | 0.288 | 0.214 | 1.15E-14 | B cells | Nrbp1    |
| 8.65E-19 | 0.42658017 | 0.179 | 0.106 | 1.23E-14 | B cells | Hist1h1c |
| 8.66E-19 | -0.3069526 | 0.108 | 0.21  | 1.23E-14 | B cells | Trim30a  |
| 9.04E-19 | -0.312003  | 0.26  | 0.41  | 1.28E-14 | B cells | Tmem234  |
| 1.09E-18 | 0.44563184 | 0.173 | 0.102 | 1.55E-14 | B cells | Filip1l  |
| 1.29E-18 | 0.40177236 | 0.495 | 0.439 | 1.83E-14 | B cells | Nop10    |
| 1.61E-18 | -0.314856  | 0.236 | 0.377 | 2.28E-14 | B cells | Tmem59   |
| 1.66E-18 | 0.41921213 | 0.191 | 0.119 | 2.35E-14 | B cells | Far1     |
| 1.77E-18 | 0.42435885 | 0.244 | 0.167 | 2.50E-14 | B cells | Add1     |
| 1.78E-18 | 0.45329222 | 0.448 | 0.388 | 2.53E-14 | B cells | Sp100    |
| 1.90E-18 | -0.2600388 | 0.058 | 0.141 | 2.69E-14 | B cells | Casp4    |
| 2.35E-18 | -0.2503562 | 0.163 | 0.286 | 3.32E-14 | B cells | Lypla2   |
| 2.79E-18 | -0.3291462 | 0.331 | 0.476 | 3.95E-14 | B cells | Atp5o    |
| 3.58E-18 | 0.40903802 | 0.151 | 0.085 | 5.06E-14 | B cells | Ilf3     |
| 3.60E-18 | -0.5037864 | 0.404 | 0.54  | 5.10E-14 | B cells | Mbnl1    |
| 3.68E-18 | 0.43169197 | 0.177 | 0.107 | 5.21E-14 | B cells | Mylip    |
| 4.19E-18 | 0.46790005 | 0.292 | 0.219 | 5.93E-14 | B cells | Oser1    |
| 4.53E-18 | -0.3921565 | 0.399 | 0.519 | 6.42E-14 | B cells | Uqcrb    |
| 4.66E-18 | -0.5730863 | 0.213 | 0.326 | 6.60E-14 | B cells | Nfe2l2   |
| 4.78E-18 | 0.45844275 | 0.191 | 0.121 | 6.76E-14 | B cells | Clp1     |
| 4.94E-18 | 0.35343203 | 0.55  | 0.495 | 6.99E-14 | B cells | Srsf5    |
| 5.07E-18 | 0.43389654 | 0.205 | 0.132 | 7.18E-14 | B cells | Scpep1   |
| 5.60E-18 | 0.40130361 | 0.228 | 0.154 | 7.93E-14 | B cells | Mfap1b   |
| 5.68E-18 | -0.2747407 | 0.071 | 0.156 | 8.05E-14 | B cells | Mcm6     |
| 5.74E-18 | -0.3482019 | 0.406 | 0.549 | 8.13E-14 | B cells | Anp32a   |



|          |            |       |       |          |         |             |
|----------|------------|-------|-------|----------|---------|-------------|
| 6.12E-18 | -0.7713554 | 0.161 | 0.264 | 8.67E-14 | B cells | Gngt2       |
| 6.34E-18 | 0.39907633 | 0.206 | 0.133 | 8.97E-14 | B cells | 5031425E22f |
| 7.99E-18 | 0.43454335 | 0.135 | 0.073 | 1.13E-13 | B cells | Icam2       |
| 9.99E-18 | -0.2710963 | 0.215 | 0.35  | 1.41E-13 | B cells | Akr1b3      |
| 1.33E-17 | -0.2511254 | 0.1   | 0.196 | 1.88E-13 | B cells | Zmiz1       |
| 1.37E-17 | -0.2517176 | 0.226 | 0.368 | 1.94E-13 | B cells | Rer1        |
| 1.45E-17 | -0.2520386 | 0.157 | 0.274 | 2.05E-13 | B cells | Rnaseh2c    |
| 1.48E-17 | -0.3660943 | 0.302 | 0.449 | 2.09E-13 | B cells | Pak2        |
| 1.70E-17 | 0.37879322 | 0.142 | 0.079 | 2.41E-13 | B cells | Tcf12       |
| 1.73E-17 | -0.3763372 | 0.45  | 0.563 | 2.45E-13 | B cells | Cox7a2      |
| 2.01E-17 | -0.3330949 | 0.337 | 0.488 | 2.85E-13 | B cells | Psenen      |
| 2.11E-17 | -0.2817621 | 0.079 | 0.166 | 2.99E-13 | B cells | Spint2      |
| 2.55E-17 | 0.43066417 | 0.188 | 0.119 | 3.61E-13 | B cells | Relb        |
| 2.93E-17 | -0.6252363 | 0.542 | 0.622 | 4.15E-13 | B cells | Arl6ip1     |
| 3.04E-17 | -0.2558269 | 0.162 | 0.28  | 4.31E-13 | B cells | Rab5c       |
| 3.16E-17 | 0.52567326 | 0.375 | 0.316 | 4.47E-13 | B cells | Cacybp      |
| 3.26E-17 | -0.8537194 | 0.264 | 0.347 | 4.62E-13 | B cells | Spi1        |
| 3.54E-17 | -0.556989  | 0.335 | 0.461 | 5.02E-13 | B cells | Plek        |
| 4.24E-17 | -0.3038161 | 0.104 | 0.199 | 6.00E-13 | B cells | Nadk        |
| 4.29E-17 | -0.2670651 | 0.18  | 0.304 | 6.07E-13 | B cells | Ak2         |
| 5.28E-17 | -0.4179814 | 0.348 | 0.483 | 7.47E-13 | B cells | Cox17       |
| 5.41E-17 | -0.358271  | 0.566 | 0.646 | 7.66E-13 | B cells | Ubl5        |
| 5.58E-17 | -0.2743463 | 0.154 | 0.267 | 7.90E-13 | B cells | Nptn        |
| 6.49E-17 | 0.39775304 | 0.207 | 0.133 | 9.19E-13 | B cells | S1pr4       |
| 7.05E-17 | 0.39254673 | 0.344 | 0.274 | 9.98E-13 | B cells | Slbp        |
| 7.21E-17 | -0.3068114 | 0.365 | 0.509 | 1.02E-12 | B cells | Srp9        |
| 7.74E-17 | 0.38525964 | 0.24  | 0.167 | 1.10E-12 | B cells | Taf6l       |
| 8.73E-17 | -1.0337588 | 0.691 | 0.683 | 1.24E-12 | B cells | Gpx1        |
| 8.82E-17 | 0.3667622  | 0.152 | 0.087 | 1.25E-12 | B cells | Gadd45a     |
| 1.41E-16 | 0.45853905 | 0.163 | 0.1   | 2.00E-12 | B cells | Ube2d1      |
| 1.45E-16 | 0.26964483 | 0.701 | 0.622 | 2.05E-12 | B cells | Limd2       |
| 1.50E-16 | -0.3181669 | 0.119 | 0.218 | 2.12E-12 | B cells | Mef2a       |
| 1.54E-16 | -0.3515278 | 0.203 | 0.322 | 2.17E-12 | B cells | Plp2        |
| 1.63E-16 | -0.3025361 | 0.349 | 0.494 | 2.30E-12 | B cells | Srp14       |
| 1.68E-16 | -0.4700879 | 0.242 | 0.351 | 2.37E-12 | B cells | Gimap3      |
| 1.70E-16 | -0.3717068 | 0.095 | 0.183 | 2.41E-12 | B cells | Gsn         |
| 1.76E-16 | -0.3331192 | 0.379 | 0.52  | 2.49E-12 | B cells | Ndufa2      |
| 1.81E-16 | -0.4781816 | 0.642 | 0.681 | 2.56E-12 | B cells | Gabarap     |
| 1.90E-16 | 0.46360173 | 0.204 | 0.136 | 2.69E-12 | B cells | Alkbh1      |
| 1.96E-16 | 0.25567502 | 0.132 | 0.07  | 2.77E-12 | B cells | Tmem64      |
| 2.02E-16 | 0.40253593 | 0.157 | 0.094 | 2.87E-12 | B cells | Chtf8       |
| 2.06E-16 | -0.3532943 | 0.457 | 0.573 | 2.92E-12 | B cells | Fis1        |
| 2.31E-16 | -0.29812   | 0.102 | 0.194 | 3.27E-12 | B cells | Hexa        |
| 2.40E-16 | -0.3246823 | 0.348 | 0.494 | 3.40E-12 | B cells | Gabarapl2   |
| 2.89E-16 | -0.287923  | 0.074 | 0.154 | 4.10E-12 | B cells | Fem1c       |
| 3.25E-16 | 0.38401496 | 0.252 | 0.182 | 4.60E-12 | B cells | Slc38a1     |
| 3.25E-16 | 0.41491331 | 0.209 | 0.141 | 4.60E-12 | B cells | Eml4        |
| 3.44E-16 | -0.3119952 | 0.258 | 0.394 | 4.87E-12 | B cells | Brk1        |

|          |            |       |       |          |         |          |
|----------|------------|-------|-------|----------|---------|----------|
| 3.88E-16 | 0.40195746 | 0.154 | 0.091 | 5.50E-12 | B cells | Pnpla8   |
| 3.91E-16 | 0.49516246 | 0.264 | 0.193 | 5.53E-12 | B cells | Smg1     |
| 4.34E-16 | 0.40888613 | 0.172 | 0.108 | 6.14E-12 | B cells | Snap29   |
| 4.48E-16 | -0.3827383 | 0.443 | 0.561 | 6.35E-12 | B cells | Cnn2     |
| 4.51E-16 | -0.2716693 | 0.211 | 0.338 | 6.38E-12 | B cells | Snrpc    |
| 4.59E-16 | -0.2862723 | 0.296 | 0.436 | 6.49E-12 | B cells | Tmed9    |
| 4.60E-16 | -0.3050283 | 0.285 | 0.427 | 6.51E-12 | B cells | Psmb6    |
| 4.92E-16 | 0.50320947 | 0.282 | 0.212 | 6.97E-12 | B cells | Odc1     |
| 5.46E-16 | -0.2741346 | 0.038 | 0.102 | 7.72E-12 | B cells | Peak1    |
| 5.51E-16 | -0.4001338 | 0.095 | 0.181 | 7.80E-12 | B cells | Sgk1     |
| 7.69E-16 | -0.3307211 | 0.093 | 0.178 | 1.09E-11 | B cells | Hck      |
| 1.02E-15 | -0.3558529 | 0.25  | 0.377 | 1.44E-11 | B cells | Cap1     |
| 1.07E-15 | 0.44119558 | 0.18  | 0.117 | 1.52E-11 | B cells | Ddx41    |
| 1.09E-15 | -0.3364052 | 0.511 | 0.603 | 1.54E-11 | B cells | Slc25a5  |
| 1.14E-15 | 0.40244781 | 0.264 | 0.195 | 1.61E-11 | B cells | Hnrnp42  |
| 1.23E-15 | 0.46163619 | 0.402 | 0.336 | 1.73E-11 | B cells | Crem     |
| 2.11E-15 | -0.3096448 | 0.17  | 0.283 | 2.99E-11 | B cells | Atg3     |
| 2.70E-15 | 0.39337717 | 0.199 | 0.133 | 3.82E-11 | B cells | Sgms1    |
| 3.01E-15 | 0.38552633 | 0.427 | 0.377 | 4.26E-11 | B cells | Luc7l2   |
| 3.34E-15 | 0.3774997  | 0.269 | 0.199 | 4.73E-11 | B cells | Hexb     |
| 3.42E-15 | 0.39684905 | 0.204 | 0.138 | 4.84E-11 | B cells | Nfkbie   |
| 4.31E-15 | -1.7413017 | 0.246 | 0.314 | 6.10E-11 | B cells | ApoE     |
| 4.97E-15 | -0.5102775 | 0.601 | 0.7   | 7.03E-11 | B cells | Ptpcr    |
| 6.02E-15 | 0.51381691 | 0.315 | 0.259 | 8.52E-11 | B cells | Arpc5l   |
| 7.79E-15 | 0.37069423 | 0.117 | 0.065 | 1.10E-10 | B cells | Phc2     |
| 8.06E-15 | 0.32665161 | 0.156 | 0.094 | 1.14E-10 | B cells | Hip1r    |
| 9.81E-15 | -0.2892834 | 0.411 | 0.532 | 1.39E-10 | B cells | Psma3    |
| 1.20E-14 | -0.2687707 | 0.235 | 0.357 | 1.70E-10 | B cells | Ranbp1   |
| 1.36E-14 | 0.44084716 | 0.351 | 0.299 | 1.92E-10 | B cells | Rnf187   |
| 1.60E-14 | 0.44196848 | 0.288 | 0.226 | 2.27E-10 | B cells | Ikbkb    |
| 1.68E-14 | -0.2994383 | 0.322 | 0.449 | 2.37E-10 | B cells | Atp5g1   |
| 1.87E-14 | -0.2676738 | 0.2   | 0.315 | 2.65E-10 | B cells | Slc9a3r1 |
| 1.88E-14 | 0.43819468 | 0.235 | 0.173 | 2.66E-10 | B cells | Uchl3    |
| 2.02E-14 | 0.40491215 | 0.346 | 0.29  | 2.85E-10 | B cells | Ubl3     |
| 2.08E-14 | -0.2882998 | 0.276 | 0.408 | 2.95E-10 | B cells | BC031181 |
| 2.59E-14 | 0.33696453 | 0.104 | 0.055 | 3.66E-10 | B cells | Fam220a  |
| 2.80E-14 | 0.39139884 | 0.179 | 0.118 | 3.96E-10 | B cells | Zmynd11  |
| 3.51E-14 | 0.43925993 | 0.24  | 0.176 | 4.96E-10 | B cells | Cd86     |
| 3.82E-14 | -0.49175   | 0.148 | 0.241 | 5.40E-10 | B cells | Ndel1    |
| 4.33E-14 | 0.44046519 | 0.299 | 0.24  | 6.14E-10 | B cells | Mtpn     |
| 4.34E-14 | 0.37294085 | 0.152 | 0.094 | 6.15E-10 | B cells | Slamf6   |
| 4.80E-14 | 0.46883823 | 0.281 | 0.223 | 6.79E-10 | B cells | Ctbp1    |
| 6.00E-14 | -0.3077867 | 0.352 | 0.481 | 8.49E-10 | B cells | Erh      |
| 6.62E-14 | -0.3460538 | 0.242 | 0.355 | 9.37E-10 | B cells | Pnp      |
| 7.67E-14 | 0.49205397 | 0.222 | 0.163 | 1.09E-09 | B cells | Limd1    |
| 7.71E-14 | 0.3911547  | 0.163 | 0.104 | 1.09E-09 | B cells | Ppp1r16b |
| 8.88E-14 | -0.2807957 | 0.236 | 0.347 | 1.26E-09 | B cells | Mrps6    |
| 1.05E-13 | -0.3602075 | 0.134 | 0.223 | 1.49E-09 | B cells | Pik3r1   |

|          |            |       |       |          |         |          |
|----------|------------|-------|-------|----------|---------|----------|
| 1.18E-13 | -0.3185121 | 0.487 | 0.586 | 1.67E-09 | B cells | Hint1    |
| 1.20E-13 | 0.4135324  | 0.183 | 0.123 | 1.70E-09 | B cells | Rnase6   |
| 1.21E-13 | 0.36670332 | 0.131 | 0.077 | 1.71E-09 | B cells | Donson   |
| 1.36E-13 | 0.42619154 | 0.199 | 0.14  | 1.92E-09 | B cells | Brix1    |
| 1.41E-13 | -0.2663101 | 0.162 | 0.262 | 2.00E-09 | B cells | Ankrd12  |
| 1.56E-13 | -0.3865666 | 0.139 | 0.226 | 2.21E-09 | B cells | Bcl2     |
| 1.70E-13 | 0.36932812 | 0.258 | 0.193 | 2.40E-09 | B cells | Atf7ip   |
| 1.83E-13 | 0.3727244  | 0.486 | 0.452 | 2.59E-09 | B cells | Eif5     |
| 1.92E-13 | -0.4137206 | 0.307 | 0.425 | 2.71E-09 | B cells | Atp6v1g1 |
| 2.05E-13 | 0.29438754 | 0.102 | 0.055 | 2.90E-09 | B cells | Dennd6a  |
| 2.11E-13 | 0.3876049  | 0.211 | 0.15  | 2.98E-09 | B cells | Blvrb    |
| 2.44E-13 | 0.34976517 | 0.119 | 0.069 | 3.45E-09 | B cells | Slc15a4  |
| 2.47E-13 | 0.40516358 | 0.33  | 0.269 | 3.49E-09 | B cells | Arid5a   |
| 2.49E-13 | 0.35949136 | 0.12  | 0.069 | 3.53E-09 | B cells | Cdk19    |
| 2.53E-13 | 0.44108926 | 0.31  | 0.254 | 3.59E-09 | B cells | Cdc42se2 |
| 3.09E-13 | 0.33493126 | 0.272 | 0.202 | 4.38E-09 | B cells | Tob1     |
| 3.36E-13 | -0.2870331 | 0.427 | 0.543 | 4.75E-09 | B cells | Psmb1    |
| 5.23E-13 | 0.35747244 | 0.128 | 0.076 | 7.41E-09 | B cells | Snhg20   |
| 7.52E-13 | 0.3747499  | 0.121 | 0.072 | 1.07E-08 | B cells | Lyl1     |
| 7.68E-13 | 0.37894756 | 0.267 | 0.205 | 1.09E-08 | B cells | Runx1    |
| 7.72E-13 | 0.34632834 | 0.126 | 0.074 | 1.09E-08 | B cells | Lncpint  |
| 8.19E-13 | 0.32533255 | 0.128 | 0.077 | 1.16E-08 | B cells | Fam120b  |
| 8.73E-13 | -0.4729158 | 0.365 | 0.442 | 1.24E-08 | B cells | 1-Sep    |
| 9.81E-13 | 0.37873472 | 0.309 | 0.252 | 1.39E-08 | B cells | Lbh      |
| 1.07E-12 | -0.2883741 | 0.571 | 0.635 | 1.51E-08 | B cells | Cltc     |
| 1.10E-12 | 0.25964314 | 0.575 | 0.542 | 1.56E-08 | B cells | Ube2b    |
| 1.15E-12 | 0.269707   | 0.564 | 0.516 | 1.63E-08 | B cells | Ppp1r15a |
| 1.22E-12 | 0.29937027 | 0.187 | 0.125 | 1.72E-08 | B cells | Sdc4     |
| 1.34E-12 | 0.4138589  | 0.247 | 0.184 | 1.89E-08 | B cells | Pmaip1   |
| 1.60E-12 | 0.40375357 | 0.137 | 0.085 | 2.26E-08 | B cells | Aff1     |
| 1.63E-12 | 0.38935944 | 0.148 | 0.096 | 2.31E-08 | B cells | Tex30    |
| 1.65E-12 | 0.29085098 | 0.114 | 0.065 | 2.34E-08 | B cells | Mir142hg |
| 1.88E-12 | 0.4051184  | 0.188 | 0.131 | 2.67E-08 | B cells | Cd38     |
| 1.95E-12 | -0.2802199 | 0.235 | 0.344 | 2.76E-08 | B cells | Tkt      |
| 2.87E-12 | -0.3368262 | 0.478 | 0.568 | 4.06E-08 | B cells | Ndufa4   |
| 2.98E-12 | 0.42486186 | 0.26  | 0.207 | 4.21E-08 | B cells | Srsf6    |
| 3.38E-12 | 0.36075448 | 0.232 | 0.173 | 4.79E-08 | B cells | Dnajb9   |
| 3.45E-12 | 0.3947907  | 0.195 | 0.139 | 4.88E-08 | B cells | Pik3ap1  |
| 3.84E-12 | 0.36563194 | 0.326 | 0.279 | 5.43E-08 | B cells | Tcp1     |
| 4.16E-12 | 0.29540499 | 0.454 | 0.408 | 5.89E-08 | B cells | Slc38a2  |
| 4.29E-12 | -0.2611931 | 0.121 | 0.202 | 6.08E-08 | B cells | Gimap9   |
| 4.76E-12 | 0.38574919 | 0.186 | 0.13  | 6.74E-08 | B cells | Setd2    |
| 4.76E-12 | 0.38198709 | 0.258 | 0.201 | 6.74E-08 | B cells | Plekho2  |
| 5.03E-12 | 0.35962703 | 0.193 | 0.135 | 7.12E-08 | B cells | Crebrf   |
| 5.32E-12 | 0.71155783 | 0.183 | 0.128 | 7.52E-08 | B cells | Rrad     |
| 5.83E-12 | 0.27508398 | 0.233 | 0.171 | 8.26E-08 | B cells | mt-Nd6   |
| 6.17E-12 | -0.6151829 | 0.309 | 0.399 | 8.73E-08 | B cells | Ctsc     |
| 6.33E-12 | 0.34254168 | 0.147 | 0.096 | 8.96E-08 | B cells | Fgd2     |

|          |            |       |       |          |         |                         |
|----------|------------|-------|-------|----------|---------|-------------------------|
| 7.74E-12 | 0.33833077 | 0.112 | 0.066 | 1.10E-07 | B cells | Myo5a                   |
| 9.13E-12 | 0.39146129 | 0.16  | 0.109 | 1.29E-07 | B cells | Pnrc2                   |
| 9.93E-12 | 0.43909766 | 0.305 | 0.258 | 1.41E-07 | B cells | Ppp1r11                 |
| 1.01E-11 | -0.2814928 | 0.079 | 0.146 | 1.42E-07 | B cells | Atg2a                   |
| 1.14E-11 | 0.35567674 | 0.132 | 0.082 | 1.61E-07 | B cells | Rnf216                  |
| 1.17E-11 | -0.7044821 | 0.963 | 0.925 | 1.66E-07 | B cells | Ftl1                    |
| 1.31E-11 | -0.2884454 | 0.081 | 0.148 | 1.86E-07 | B cells | Cd274                   |
| 1.34E-11 | 0.4390532  | 0.269 | 0.216 | 1.89E-07 | B cells | Rbm5                    |
| 1.37E-11 | 0.33769916 | 0.137 | 0.088 | 1.93E-07 | B cells | Rnf2                    |
| 1.50E-11 | 0.41345577 | 0.211 | 0.158 | 2.13E-07 | B cells | Polr2m                  |
| 1.71E-11 | 0.28005579 | 0.106 | 0.061 | 2.42E-07 | B cells | Clcf1                   |
| 2.06E-11 | 0.416524   | 0.207 | 0.155 | 2.92E-07 | B cells | Rraga                   |
| 2.11E-11 | 0.36495358 | 0.184 | 0.131 | 2.99E-07 | B cells | Ncoa3                   |
| 2.39E-11 | 0.35629418 | 0.191 | 0.138 | 3.39E-07 | B cells | Cpsf6                   |
| 2.46E-11 | 0.31304892 | 0.231 | 0.173 | 3.48E-07 | B cells | Chd2                    |
| 2.50E-11 | 0.41288793 | 0.257 | 0.204 | 3.54E-07 | B cells | Ctnnb1                  |
| 2.59E-11 | 0.40544267 | 0.2   | 0.146 | 3.67E-07 | B cells | Dedd2                   |
| 2.78E-11 | 0.31661369 | 0.138 | 0.088 | 3.94E-07 | B cells | Elk4                    |
| 2.86E-11 | 0.40394414 | 0.146 | 0.097 | 4.05E-07 | B cells | Med7                    |
| 2.87E-11 | 0.26892848 | 0.498 | 0.465 | 4.06E-07 | B cells | Atp5a1                  |
| 3.58E-11 | -0.2625487 | 0.152 | 0.238 | 5.07E-07 | B cells | Med21                   |
| 4.03E-11 | -0.2767215 | 0.187 | 0.282 | 5.70E-07 | B cells | Mbnl2                   |
| 4.28E-11 | 0.42516551 | 0.169 | 0.12  | 6.06E-07 | B cells | Rbmxl1                  |
| 4.32E-11 | -0.2789885 | 0.433 | 0.545 | 6.12E-07 | B cells | Atp6v1f                 |
| 4.34E-11 | -0.3656419 | 0.467 | 0.555 | 6.14E-07 | B cells | Ran                     |
| 4.87E-11 | -0.2751989 | 0.204 | 0.303 | 6.89E-07 | B cells | Dock10                  |
| 5.43E-11 | 0.33098659 | 0.182 | 0.128 | 7.69E-07 | B cells | Trim12a                 |
| 5.51E-11 | 0.35715048 | 0.112 | 0.068 | 7.80E-07 | B cells | Rnf41                   |
| 6.32E-11 | -0.2893409 | 0.589 | 0.647 | 8.95E-07 | B cells | Ppp1ca                  |
| 6.45E-11 | 0.50917725 | 0.171 | 0.121 | 9.13E-07 | B cells | Map3k8                  |
| 6.65E-11 | 0.32901808 | 0.122 | 0.076 | 9.42E-07 | B cells | Trmt10c                 |
| 6.82E-11 | 0.31668717 | 0.154 | 0.104 | 9.65E-07 | B cells | Kpna1                   |
| 7.11E-11 | -0.3492082 | 0.522 | 0.612 | 1.01E-06 | B cells | Gmfg                    |
| 7.44E-11 | 0.38828283 | 0.187 | 0.137 | 1.05E-06 | B cells | Ap1m1                   |
| 7.61E-11 | 0.38796345 | 0.163 | 0.114 | 1.08E-06 | B cells | Gt(ROSA)26 <sup>+</sup> |
| 8.08E-11 | 0.27015403 | 0.116 | 0.07  | 1.14E-06 | B cells | Fbxl12                  |
| 8.45E-11 | 0.41742135 | 0.221 | 0.169 | 1.20E-06 | B cells | Clk4                    |
| 8.50E-11 | 0.40708288 | 0.116 | 0.072 | 1.20E-06 | B cells | Csrp2                   |
| 9.26E-11 | 0.37594285 | 0.188 | 0.137 | 1.31E-06 | B cells | Pim3                    |
| 9.87E-11 | 0.28718142 | 0.435 | 0.402 | 1.40E-06 | B cells | Eif3e                   |
| 1.04E-10 | 0.3841522  | 0.236 | 0.185 | 1.47E-06 | B cells | Ifnar1                  |
| 1.13E-10 | 0.25854188 | 0.194 | 0.137 | 1.59E-06 | B cells | Myadm                   |
| 1.16E-10 | 0.31269276 | 0.138 | 0.09  | 1.64E-06 | B cells | Tsc22d2                 |
| 1.18E-10 | -0.3271919 | 0.229 | 0.322 | 1.67E-06 | B cells | Man2b1                  |
| 1.41E-10 | 0.41947506 | 0.266 | 0.222 | 2.00E-06 | B cells | U2af2                   |
| 1.58E-10 | 0.3220476  | 0.1   | 0.059 | 2.24E-06 | B cells | Foxp4                   |
| 1.64E-10 | 0.32765604 | 0.11  | 0.067 | 2.33E-06 | B cells | Tusc2                   |
| 1.72E-10 | 0.27125574 | 0.139 | 0.091 | 2.43E-06 | B cells | Rassf3                  |

|          |            |       |       |            |         |             |
|----------|------------|-------|-------|------------|---------|-------------|
| 1.78E-10 | 0.40220095 | 0.243 | 0.196 | 2.52E-06   | B cells | Cct3        |
| 1.89E-10 | 0.2705488  | 0.114 | 0.07  | 2.68E-06   | B cells | Prr14l      |
| 2.15E-10 | 0.40481464 | 0.219 | 0.169 | 3.05E-06   | B cells | Isca1       |
| 2.43E-10 | 0.32334053 | 0.378 | 0.333 | 3.44E-06   | B cells | B4galnt1    |
| 2.60E-10 | 0.30598878 | 0.178 | 0.128 | 3.68E-06   | B cells | Vamp2       |
| 2.63E-10 | -0.2709456 | 0.28  | 0.388 | 3.72E-06   | B cells | Dek         |
| 2.89E-10 | 0.31257997 | 0.113 | 0.071 | 4.09E-06   | B cells | Kansl2      |
| 3.12E-10 | 0.3481     | 0.173 | 0.124 | 4.41E-06   | B cells | Vezf1       |
| 3.14E-10 | 0.38076579 | 0.153 | 0.107 | 4.44E-06   | B cells | 4933434E20F |
| 3.17E-10 | 0.30431591 | 0.107 | 0.064 | 4.49E-06   | B cells | Fam169b     |
| 3.56E-10 | 0.26877018 | 0.431 | 0.396 | 5.04E-06   | B cells | Tmed2       |
| 3.79E-10 | -0.2504221 | 0.218 | 0.316 | 5.37E-06   | B cells | Tor1aip1    |
| 4.05E-10 | 0.30764548 | 0.137 | 0.09  | 5.73E-06   | B cells | Senp7       |
| 4.23E-10 | -0.2575507 | 0.114 | 0.184 | 5.99E-06   | B cells | Suco        |
| 4.30E-10 | 0.30199331 | 0.128 | 0.083 | 6.08E-06   | B cells | Tfeb        |
| 4.73E-10 | 0.38065388 | 0.237 | 0.19  | 6.70E-06   | B cells | Lat2        |
| 5.09E-10 | 0.38936988 | 0.279 | 0.238 | 7.21E-06   | B cells | Emc6        |
| 5.41E-10 | 0.28815293 | 0.357 | 0.311 | 7.66E-06   | B cells | Tra2a       |
| 6.03E-10 | 0.3846342  | 0.152 | 0.107 | 8.53E-06   | B cells | Fh1         |
| 7.53E-10 | -0.2585224 | 0.304 | 0.408 | 1.07E-05   | B cells | Laptm4a     |
| 8.30E-10 | 0.35283731 | 0.333 | 0.296 | 1.18E-05   | B cells | Atp6v0d1    |
| 1.04E-09 | 0.35581925 | 0.263 | 0.215 | 1.47E-05   | B cells | Tuba4a      |
| 1.06E-09 | 0.37602256 | 0.353 | 0.323 | 1.50E-05   | B cells | Cct7        |
| 1.28E-09 | 0.38597029 | 0.137 | 0.094 | 1.82E-05   | B cells | Dnase2a     |
| 1.29E-09 | 0.30019061 | 0.108 | 0.067 | 1.82E-05   | B cells | Zfp868      |
| 1.33E-09 | 0.27081971 | 0.206 | 0.152 | 1.88E-05   | B cells | Gm26740     |
| 1.71E-09 | 0.35611805 | 0.202 | 0.152 | 2.42E-05   | B cells | Kif21b      |
| 1.71E-09 | 0.30174576 | 0.277 | 0.229 | 2.42E-05   | B cells | Prrc2a      |
| 1.80E-09 | 0.40515109 | 0.183 | 0.138 | 2.55E-05   | B cells | Rfc1        |
| 1.87E-09 | 0.38830159 | 0.248 | 0.203 | 2.65E-05   | B cells | Nop56       |
| 1.96E-09 | 0.25920132 | 0.134 | 0.089 | 2.78E-05   | B cells | Mga         |
| 2.10E-09 | 0.35732658 | 0.195 | 0.149 | 2.97E-05   | B cells | Fam168b     |
| 2.12E-09 | -0.4006748 | 0.506 | 0.588 | 3.00E-05   | B cells | Hsp90b1     |
| 2.34E-09 | 0.29496275 | 0.205 | 0.158 | 3.31E-05   | B cells | Cmtm6       |
| 2.95E-09 | 0.39780933 | 0.237 | 0.197 | 4.17E-05   | B cells | Sf3b4       |
| 4.08E-09 | -0.2934141 | 0.106 | 0.17  | 5.78E-05   | B cells | Fbxl5       |
| 4.51E-09 | -0.5961316 | 0.993 | 0.981 | 6.39E-05   | B cells | Malat1      |
| 4.65E-09 | 0.26827431 | 0.307 | 0.254 | 6.58E-05   | B cells | Ssh2        |
| 6.05E-09 | -0.3139447 | 0.128 | 0.196 | 8.57E-05   | B cells | 4932438A13I |
| 6.29E-09 | 0.37657993 | 0.214 | 0.17  | 8.90E-05   | B cells | Krit1       |
| 6.78E-09 | 0.34112074 | 0.21  | 0.168 | 9.60E-05   | B cells | Rtcb        |
| 7.51E-09 | 0.27191837 | 0.109 | 0.07  | 0.00010626 | B cells | Slc25a25    |
| 9.30E-09 | 0.27585687 | 0.18  | 0.133 | 0.0001317  | B cells | Samd9l      |
| 9.35E-09 | 0.30257761 | 0.113 | 0.074 | 0.00013233 | B cells | Atg16l2     |
| 9.39E-09 | 0.28344329 | 0.211 | 0.165 | 0.00013296 | B cells | Morf4l2     |
| 1.15E-08 | 0.32195081 | 0.337 | 0.305 | 0.00016222 | B cells | Ptges3      |
| 1.16E-08 | 0.33984299 | 0.195 | 0.152 | 0.0001644  | B cells | Trim28      |
| 1.22E-08 | -0.2762205 | 0.489 | 0.565 | 0.0001724  | B cells | Cox6a1      |

|          |            |       |       |            |         |            |
|----------|------------|-------|-------|------------|---------|------------|
| 1.35E-08 | 0.34692508 | 0.132 | 0.092 | 0.00019054 | B cells | Srp54b     |
| 1.46E-08 | -0.3970931 | 0.136 | 0.205 | 0.00020635 | B cells | Tubb2a     |
| 1.47E-08 | 0.32661806 | 0.32  | 0.286 | 0.00020819 | B cells | Vapa       |
| 1.54E-08 | 0.3625367  | 0.211 | 0.167 | 0.00021803 | B cells | Zc3h12a    |
| 1.56E-08 | 0.33169059 | 0.286 | 0.242 | 0.00022045 | B cells | Nedd9      |
| 1.62E-08 | -0.2510524 | 0.262 | 0.358 | 0.00022895 | B cells | Ncor1      |
| 1.69E-08 | 0.33055824 | 0.133 | 0.093 | 0.00023976 | B cells | Rnf146     |
| 1.82E-08 | 0.34355063 | 0.225 | 0.182 | 0.0002579  | B cells | Hnrnp3     |
| 2.09E-08 | 0.32602174 | 0.233 | 0.189 | 0.0002956  | B cells | Arid4b     |
| 2.14E-08 | 0.33515181 | 0.195 | 0.15  | 0.00030298 | B cells | St8sia4    |
| 2.23E-08 | -0.2748947 | 0.398 | 0.493 | 0.00031564 | B cells | Gpi1       |
| 2.30E-08 | -0.5566903 | 0.67  | 0.723 | 0.00032619 | B cells | Btg2       |
| 2.33E-08 | 0.28558031 | 0.126 | 0.086 | 0.0003292  | B cells | Zmym5      |
| 2.47E-08 | 0.28071022 | 0.352 | 0.315 | 0.00034987 | B cells | Ptpn6      |
| 2.49E-08 | 0.36329468 | 0.366 | 0.348 | 0.00035284 | B cells | Mrfap1     |
| 2.52E-08 | 0.27463183 | 0.149 | 0.106 | 0.00035719 | B cells | Notch2     |
| 2.83E-08 | 0.3506522  | 0.275 | 0.237 | 0.00040046 | B cells | Epn1       |
| 3.28E-08 | 0.3416523  | 0.4   | 0.381 | 0.00046454 | B cells | Hspa4      |
| 3.28E-08 | -0.4564414 | 0.058 | 0.102 | 0.00046487 | B cells | Sh2d3c     |
| 3.71E-08 | 0.37046225 | 0.268 | 0.231 | 0.00052575 | B cells | Srsf10     |
| 4.28E-08 | 0.36346163 | 0.172 | 0.132 | 0.00060636 | B cells | Yrdc       |
| 4.60E-08 | 0.32932715 | 0.232 | 0.193 | 0.00065158 | B cells | Sdha       |
| 5.21E-08 | 0.36918304 | 0.151 | 0.111 | 0.00073782 | B cells | Epb41l4aos |
| 5.41E-08 | 0.40304914 | 0.284 | 0.255 | 0.00076612 | B cells | Cct4       |
| 6.58E-08 | 0.3374972  | 0.166 | 0.126 | 0.00093102 | B cells | Wtap       |
| 6.59E-08 | 0.29012073 | 0.327 | 0.297 | 0.00093222 | B cells | Rsrc2      |
| 6.65E-08 | 0.31785527 | 0.278 | 0.24  | 0.00094156 | B cells | Mknk2      |
| 6.69E-08 | 0.32295556 | 0.127 | 0.088 | 0.00094658 | B cells | Flcn       |
| 6.96E-08 | 0.34252572 | 0.188 | 0.147 | 0.00098489 | B cells | Pdia4      |
| 7.05E-08 | 0.30697825 | 0.104 | 0.068 | 0.00099753 | B cells | Lpp        |
| 7.64E-08 | 0.27151335 | 0.306 | 0.27  | 0.00108088 | B cells | Khdrbs1    |
| 8.22E-08 | 0.47420899 | 0.172 | 0.135 | 0.00116406 | B cells | Plekho1    |
| 8.55E-08 | 0.29693489 | 0.107 | 0.071 | 0.00121021 | B cells | Rbm48      |
| 9.25E-08 | 0.31656416 | 0.178 | 0.136 | 0.00130972 | B cells | Arhgap4    |
| 9.85E-08 | 0.35214739 | 0.255 | 0.22  | 0.00139481 | B cells | G3bp1      |
| 1.04E-07 | 0.33538798 | 0.194 | 0.154 | 0.00147508 | B cells | Fam204a    |
| 1.05E-07 | 0.31854114 | 0.18  | 0.138 | 0.00149233 | B cells | Gdi1       |
| 1.09E-07 | 0.30546586 | 0.351 | 0.327 | 0.00154726 | B cells | Rab11b     |
| 1.10E-07 | 0.3610881  | 0.263 | 0.229 | 0.00156361 | B cells | Yeats4     |
| 1.14E-07 | 0.2538096  | 0.134 | 0.095 | 0.00160783 | B cells | Zbtb20     |
| 1.16E-07 | -0.2536521 | 0.222 | 0.299 | 0.00164838 | B cells | Gm2a       |
| 1.18E-07 | 0.36661459 | 0.223 | 0.188 | 0.00166347 | B cells | Bccip      |
| 1.18E-07 | -0.3057036 | 0.616 | 0.651 | 0.00167611 | B cells | Sumo2      |
| 1.24E-07 | 0.28761276 | 0.291 | 0.249 | 0.00175815 | B cells | Wsb1       |
| 1.34E-07 | 0.28879795 | 0.365 | 0.341 | 0.00190272 | B cells | Cct2       |
| 1.51E-07 | 0.37189027 | 0.206 | 0.17  | 0.00214189 | B cells | Ddx54      |
| 1.69E-07 | 0.33766104 | 0.27  | 0.237 | 0.00239776 | B cells | Ppm1g      |
| 1.76E-07 | 0.3344537  | 0.165 | 0.127 | 0.00249727 | B cells | Aars       |

|          |            |       |       |            |         |         |
|----------|------------|-------|-------|------------|---------|---------|
| 1.85E-07 | 0.3252868  | 0.215 | 0.175 | 0.00261544 | B cells | Ep400   |
| 1.88E-07 | 0.29619201 | 0.214 | 0.171 | 0.00266036 | B cells | Acap1   |
| 1.93E-07 | 0.32859748 | 0.231 | 0.193 | 0.00273654 | B cells | Nxf1    |
| 1.96E-07 | 0.34763231 | 0.148 | 0.111 | 0.00276957 | B cells | Mrpl38  |
| 2.19E-07 | 0.29734122 | 0.128 | 0.091 | 0.00309763 | B cells | Rest    |
| 2.43E-07 | 0.30684663 | 0.148 | 0.11  | 0.00344478 | B cells | Gpkow   |
| 2.47E-07 | -0.5568917 | 0.529 | 0.581 | 0.0034962  | B cells | Zfp36l2 |
| 2.48E-07 | 0.3490256  | 0.15  | 0.113 | 0.00351227 | B cells | P2rx4   |
| 2.72E-07 | 0.32013204 | 0.132 | 0.096 | 0.00384626 | B cells | Pex13   |
| 2.72E-07 | 0.40259607 | 0.263 | 0.231 | 0.00385492 | B cells | Atg101  |
| 2.98E-07 | 0.31161062 | 0.195 | 0.159 | 0.00422024 | B cells | Ppp6c   |
| 2.98E-07 | 0.27758457 | 0.365 | 0.339 | 0.00422089 | B cells | Ywhaq   |
| 3.03E-07 | 0.27037171 | 0.134 | 0.095 | 0.00428982 | B cells | Pim2    |
| 3.16E-07 | 0.2583228  | 0.119 | 0.084 | 0.00447536 | B cells | Ctps2   |
| 3.52E-07 | 0.25982895 | 0.218 | 0.175 | 0.00497587 | B cells | Amd1    |
| 3.72E-07 | 0.3867284  | 0.113 | 0.078 | 0.00527027 | B cells | Bambi   |
| 3.83E-07 | 0.25755848 | 0.118 | 0.083 | 0.00542582 | B cells | Aida    |
| 4.02E-07 | -0.3085185 | 0.335 | 0.423 | 0.00568607 | B cells | Ifrd1   |
| 4.55E-07 | 0.30141027 | 0.286 | 0.253 | 0.00644163 | B cells | Ptk2b   |
| 4.65E-07 | 0.30479345 | 0.244 | 0.208 | 0.00657575 | B cells | Rlim    |
| 4.84E-07 | 0.31743109 | 0.204 | 0.169 | 0.00685377 | B cells | Rbm7    |
| 4.87E-07 | 0.32495164 | 0.169 | 0.133 | 0.00688912 | B cells | Galnt1  |
| 5.31E-07 | 0.30512752 | 0.11  | 0.077 | 0.00751712 | B cells | Trmt1   |
| 6.31E-07 | 0.30754889 | 0.224 | 0.187 | 0.00893318 | B cells | Ccnt1   |
| 6.75E-07 | 0.39108731 | 0.225 | 0.193 | 0.00954971 | B cells | Nsmce4a |
| 7.01E-07 | 0.3811354  | 0.182 | 0.148 | 0.00992349 | B cells | Ythdf2  |
| 7.26E-07 | 0.28965668 | 0.125 | 0.091 | 0.01027073 | B cells | Fbxo38  |
| 7.56E-07 | 0.29150873 | 0.214 | 0.177 | 0.01070048 | B cells | Hbp1    |
| 7.96E-07 | 0.32479403 | 0.277 | 0.248 | 0.01127514 | B cells | Maf1    |
| 9.30E-07 | 0.31626511 | 0.294 | 0.264 | 0.01317099 | B cells | Cebpz   |
| 9.34E-07 | 0.33518849 | 0.184 | 0.148 | 0.01321522 | B cells | Chkb    |
| 1.00E-06 | -0.5856125 | 0.613 | 0.66  | 0.01422673 | B cells | Fos     |
| 1.02E-06 | 0.32472167 | 0.254 | 0.223 | 0.01448068 | B cells | Wbp11   |
| 1.03E-06 | 0.25902917 | 0.111 | 0.078 | 0.01458998 | B cells | Fbxl3   |
| 1.07E-06 | 0.31642263 | 0.143 | 0.109 | 0.01519866 | B cells | Rnpepl1 |
| 1.11E-06 | 0.37101997 | 0.22  | 0.185 | 0.01565593 | B cells | N4bp2l2 |
| 1.14E-06 | 0.3290242  | 0.313 | 0.283 | 0.0161149  | B cells | Acp5    |
| 1.57E-06 | 0.30747268 | 0.154 | 0.119 | 0.02216859 | B cells | Setd5   |
| 1.57E-06 | 0.3348945  | 0.204 | 0.169 | 0.02217598 | B cells | Mfap1a  |
| 1.81E-06 | 0.25700441 | 0.225 | 0.188 | 0.02559405 | B cells | Kdm7a   |
| 1.82E-06 | 0.31640233 | 0.145 | 0.111 | 0.02570267 | B cells | Cd2ap   |
| 1.98E-06 | 0.26668038 | 0.273 | 0.24  | 0.02801176 | B cells | Cd164   |
| 2.02E-06 | 0.41087114 | 0.229 | 0.201 | 0.02852804 | B cells | Impdh2  |
| 2.09E-06 | 0.28979609 | 0.141 | 0.108 | 0.02954863 | B cells | Atl3    |
| 2.24E-06 | 0.26899133 | 0.393 | 0.382 | 0.0317172  | B cells | Pgls    |
| 2.81E-06 | 0.3631678  | 0.218 | 0.188 | 0.03971196 | B cells | Strap   |
| 3.63E-06 | 0.3029353  | 0.131 | 0.099 | 0.05139048 | B cells | Zmiz2   |
| 3.77E-06 | 0.2859047  | 0.236 | 0.204 | 0.05331168 | B cells | Top2b   |

|          |            |       |       |            |         |          |
|----------|------------|-------|-------|------------|---------|----------|
| 3.88E-06 | 0.30496676 | 0.197 | 0.164 | 0.05491915 | B cells | Tm9sf2   |
| 4.37E-06 | 0.2790104  | 0.144 | 0.111 | 0.06182643 | B cells | Qrich1   |
| 5.19E-06 | 0.34189822 | 0.174 | 0.143 | 0.07352657 | B cells | Lats2    |
| 5.93E-06 | 0.26084955 | 0.272 | 0.245 | 0.08398498 | B cells | Thrap3   |
| 5.94E-06 | 0.26250935 | 0.118 | 0.087 | 0.08413164 | B cells | Dynlt3   |
| 6.24E-06 | 0.26653529 | 0.244 | 0.213 | 0.08836992 | B cells | Zdhhc20  |
| 6.44E-06 | 0.28271849 | 0.127 | 0.096 | 0.09111976 | B cells | Mtf2     |
| 6.56E-06 | 0.27942252 | 0.31  | 0.286 | 0.09288627 | B cells | Lrp10    |
| 6.88E-06 | 0.25976315 | 0.391 | 0.381 | 0.0973756  | B cells | Cdc42se1 |
| 7.18E-06 | 0.26229843 | 0.291 | 0.267 | 0.10162581 | B cells | Eif4b    |
| 7.30E-06 | 0.33755397 | 0.162 | 0.131 | 0.10338246 | B cells | Ccz1     |
| 7.70E-06 | 0.34583248 | 0.347 | 0.336 | 0.10904784 | B cells | Ahsa1    |
| 8.03E-06 | 0.32485295 | 0.116 | 0.086 | 0.11361234 | B cells | Coq2     |
| 8.86E-06 | 0.26591114 | 0.101 | 0.072 | 0.12548151 | B cells | Prps1    |
| 9.90E-06 | 0.30870951 | 0.24  | 0.212 | 0.14018722 | B cells | Elavl1   |
| 9.98E-06 | 0.29749799 | 0.128 | 0.096 | 0.14127134 | B cells | Ahctf1   |
| 1.03E-05 | 0.31285115 | 0.13  | 0.099 | 0.14639342 | B cells | Trim27   |
| 1.06E-05 | 0.27494326 | 0.346 | 0.329 | 0.14986343 | B cells | Mndal    |
| 1.19E-05 | 0.30287969 | 0.114 | 0.084 | 0.16815835 | B cells | Usp36    |
| 1.23E-05 | 0.33616129 | 0.256 | 0.227 | 0.173557   | B cells | Il4ra    |
| 1.24E-05 | 0.26227878 | 0.104 | 0.075 | 0.17595573 | B cells | Ttc5     |
| 1.38E-05 | 0.26304427 | 0.109 | 0.08  | 0.19516473 | B cells | Isg20l2  |
| 1.48E-05 | 0.3107267  | 0.134 | 0.104 | 0.20949863 | B cells | Gle1     |
| 1.62E-05 | 0.25219019 | 0.109 | 0.08  | 0.22891209 | B cells | Hsf1     |
| 1.64E-05 | 0.26346746 | 0.128 | 0.098 | 0.23159838 | B cells | Tia1     |
| 1.71E-05 | 0.32288399 | 0.218 | 0.189 | 0.24223865 | B cells | Prpf8    |
| 1.74E-05 | 0.28999019 | 0.159 | 0.13  | 0.24581583 | B cells | Smarcd2  |
| 1.76E-05 | 0.28128421 | 0.118 | 0.089 | 0.24882097 | B cells | Pgam5    |
| 1.84E-05 | 0.36897597 | 0.174 | 0.145 | 0.26076324 | B cells | Gatad2b  |
| 1.85E-05 | 0.346502   | 0.221 | 0.194 | 0.26259065 | B cells | Atxn2l   |
| 2.06E-05 | 0.26940566 | 0.118 | 0.089 | 0.2912493  | B cells | Gm6377   |
| 2.24E-05 | 0.32245766 | 0.155 | 0.125 | 0.31742513 | B cells | Trim35   |
| 2.33E-05 | 0.30558731 | 0.127 | 0.098 | 0.32997358 | B cells | Prorsd1  |
| 2.41E-05 | 0.26421942 | 0.18  | 0.15  | 0.34109652 | B cells | Pias1    |
| 2.51E-05 | 0.26352859 | 0.186 | 0.155 | 0.35592898 | B cells | Herc4    |
| 2.63E-05 | 0.32714301 | 0.279 | 0.264 | 0.37186013 | B cells | Cct8     |
| 2.73E-05 | 0.26588168 | 0.134 | 0.105 | 0.38688784 | B cells | Cnot2    |
| 2.88E-05 | 0.27106054 | 0.101 | 0.074 | 0.40722548 | B cells | Kti12    |
| 2.92E-05 | 0.30740838 | 0.144 | 0.115 | 0.41266798 | B cells | Cep57    |
| 3.04E-05 | 0.25876415 | 0.146 | 0.117 | 0.42988132 | B cells | Prr14    |
| 3.18E-05 | 0.26105793 | 0.348 | 0.336 | 0.4507674  | B cells | Mtdh     |
| 3.78E-05 | 0.3148005  | 0.213 | 0.186 | 0.5349496  | B cells | Sf3b3    |
| 4.09E-05 | 0.28207012 | 0.204 | 0.176 | 0.57863694 | B cells | Ttc14    |
| 4.67E-05 | 0.27491109 | 0.166 | 0.138 | 0.66127478 | B cells | Nek7     |
| 4.87E-05 | -0.3083912 | 0.201 | 0.246 | 0.68958619 | B cells | Pld4     |
| 4.99E-05 | -0.2895915 | 0.327 | 0.405 | 0.70636068 | B cells | Itga4    |
| 5.19E-05 | 0.29922133 | 0.163 | 0.135 | 0.73409472 | B cells | Swt1     |
| 5.37E-05 | 0.25568572 | 0.202 | 0.174 | 0.76084499 | B cells | Ppp1cb   |



|            |            |       |       |            |           |           |
|------------|------------|-------|-------|------------|-----------|-----------|
| 5.82E-05   | 0.27294    | 0.166 | 0.139 | 0.8242727  | B cells   | Trim26    |
| 5.90E-05   | 0.27726577 | 0.251 | 0.225 | 0.83545812 | B cells   | Epc1      |
| 6.41E-05   | 0.28304295 | 0.155 | 0.128 | 0.90776888 | B cells   | Prpf38a   |
| 6.88E-05   | -0.3284616 | 0.4   | 0.466 | 0.97402503 | B cells   | Dusp5     |
| 7.63E-05   | 0.2750332  | 0.223 | 0.193 |            | 1 B cells | Tagap     |
| 7.76E-05   | 0.27512236 | 0.361 | 0.361 |            | 1 B cells | Llph      |
| 8.15E-05   | 0.25073448 | 0.266 | 0.241 |            | 1 B cells | Arhgap15  |
| 8.98E-05   | 0.27946784 | 0.118 | 0.092 |            | 1 B cells | Sfswap    |
| 9.52E-05   | 0.31515508 | 0.195 | 0.171 |            | 1 B cells | Hspa9     |
| 9.60E-05   | 0.30773195 | 0.164 | 0.139 |            | 1 B cells | Dcaf12    |
| 9.82E-05   | 0.2727395  | 0.145 | 0.116 |            | 1 B cells | Arhgap25  |
| 0.00011178 | 0.28840371 | 0.258 | 0.24  |            | 1 B cells | Rbbp4     |
| 0.00015574 | -0.3652242 | 0.534 | 0.593 |            | 1 B cells | Myh9      |
| 0.00015888 | 0.25450663 | 0.271 | 0.252 |            | 1 B cells | Bclaf1    |
| 0.00017905 | 0.29780357 | 0.217 | 0.195 |            | 1 B cells | Azin1     |
| 0.00018055 | 0.27991276 | 0.196 | 0.171 |            | 1 B cells | Kdm5a     |
| 0.00018452 | 0.3321284  | 0.168 | 0.144 |            | 1 B cells | Trappc5   |
| 0.00019155 | 0.25742436 | 0.141 | 0.115 |            | 1 B cells | Lin7c     |
| 0.00019389 | 0.32457438 | 0.197 | 0.175 |            | 1 B cells | Zfp622    |
| 0.00019828 | 0.43435794 | 0.325 | 0.321 |            | 1 B cells | Rilpl2    |
| 0.00023235 | 0.32428276 | 0.142 | 0.117 |            | 1 B cells | Arl5c     |
| 0.00024146 | 0.25090314 | 0.134 | 0.108 |            | 1 B cells | Abt1      |
| 0.00025436 | 0.26398259 | 0.103 | 0.079 |            | 1 B cells | Tex10     |
| 0.0002619  | 0.26671742 | 0.111 | 0.087 |            | 1 B cells | Cops3     |
| 0.00030478 | 0.28531515 | 0.288 | 0.277 |            | 1 B cells | St13      |
| 0.00030831 | 0.28058831 | 0.219 | 0.199 |            | 1 B cells | Serinc1   |
| 0.00031957 | 0.34333602 | 0.208 | 0.188 |            | 1 B cells | Gm11808   |
| 0.00034029 | 0.27896304 | 0.104 | 0.081 |            | 1 B cells | Heatr6    |
| 0.00034413 | -0.4499028 | 0.161 | 0.199 |            | 1 B cells | Stmn1     |
| 0.00035795 | 0.30011806 | 0.255 | 0.242 |            | 1 B cells | Ubap2l    |
| 0.00039313 | 0.3147233  | 0.25  | 0.23  |            | 1 B cells | Rhoh      |
| 0.00050546 | 0.26514048 | 0.241 | 0.221 |            | 1 B cells | Slc1a5    |
| 0.00054983 | 0.273377   | 0.289 | 0.286 |            | 1 B cells | Hypk      |
| 0.00058001 | 0.25531419 | 0.15  | 0.127 |            | 1 B cells | Akap8l    |
| 0.00064045 | 0.28713643 | 0.114 | 0.093 |            | 1 B cells | Ppm1m     |
| 0.00065181 | 0.25917552 | 0.145 | 0.122 |            | 1 B cells | Mybbp1a   |
| 0.00071954 | 0.30180257 | 0.144 | 0.122 |            | 1 B cells | Mphosph10 |
| 0.00082834 | 0.26938076 | 0.18  | 0.161 |            | 1 B cells | Naa50     |
| 0.00089704 | 0.28812418 | 0.212 | 0.195 |            | 1 B cells | Anapc5    |
| 0.00089888 | 0.25360363 | 0.113 | 0.091 |            | 1 B cells | Nuak2     |
| 0.00099167 | 0.26873975 | 0.222 | 0.205 |            | 1 B cells | Uvrag     |
| 0.0010172  | 0.31776576 | 0.234 | 0.221 |            | 1 B cells | Ogdh      |
| 0.0012161  | 0.3077192  | 0.177 | 0.159 |            | 1 B cells | Bcl7b     |
| 0.00130176 | 0.32678822 | 0.189 | 0.173 |            | 1 B cells | Nsmce1    |
| 0.00139281 | 0.26377156 | 0.128 | 0.107 |            | 1 B cells | Herpud2   |
| 0.00164182 | 0.30314967 | 0.19  | 0.175 |            | 1 B cells | Rbm17     |
| 0.00167589 | 0.25300384 | 0.149 | 0.129 |            | 1 B cells | Rbm33     |
| 0.00182869 | 0.30560737 | 0.132 | 0.113 |            | 1 B cells | Txndc11   |

|            |            |       |       |             |         |
|------------|------------|-------|-------|-------------|---------|
| 0.00185332 | 0.29629593 | 0.177 | 0.16  | 1 B cells   | Rad23b  |
| 0.00216147 | -0.5674599 | 0.597 | 0.599 | 1 B cells   | Nfkbia  |
| 0.00246881 | -0.3920305 | 0.216 | 0.258 | 1 B cells   | Ets2    |
| 0.00266115 | 0.29871799 | 0.183 | 0.166 | 1 B cells   | B3gnt2  |
| 0.00272592 | 0.26920514 | 0.151 | 0.133 | 1 B cells   | Nelfb   |
| 0.00338762 | 0.29392918 | 0.299 | 0.298 | 1 B cells   | Slc50a1 |
| 0.0037735  | 0.266403   | 0.153 | 0.136 | 1 B cells   | Cnpy3   |
| 0.00600556 | 0.27447921 | 0.242 | 0.234 | 1 B cells   | Chd1    |
| 0.00663496 | 0.25024168 | 0.143 | 0.126 | 1 B cells   | Tspan32 |
| 0.00706809 | 0.27624211 | 0.278 | 0.279 | 1 B cells   | Puf60   |
| 0          | 3.53439969 | 0.853 | 0.163 | 0 Monocytes | Lyz2    |
| 0          | 3.30979075 | 0.531 | 0.078 | 0 Monocytes | C1qb    |
| 0          | 3.25137669 | 0.811 | 0.134 | 0 Monocytes | Ifitm3  |
| 0          | 2.97263353 | 0.487 | 0.064 | 0 Monocytes | C1qa    |
| 0          | 2.90883555 | 0.431 | 0.032 | 0 Monocytes | Cxcl9   |
| 0          | 2.8916013  | 0.484 | 0.058 | 0 Monocytes | C1qc    |
| 0          | 2.78674112 | 0.881 | 0.433 | 0 Monocytes | Ctss    |
| 0          | 2.69547599 | 0.851 | 0.413 | 0 Monocytes | Psap    |
| 0          | 2.65990393 | 0.67  | 0.059 | 0 Monocytes | Ms4a6c  |
| 0          | 2.65130112 | 0.871 | 0.458 | 0 Monocytes | Cst3    |
| 0          | 2.60993793 | 0.685 | 0.153 | 0 Monocytes | ApoE    |
| 0          | 2.39033058 | 0.552 | 0.073 | 0 Monocytes | Tgfbi   |
| 0          | 2.26607717 | 0.743 | 0.242 | 0 Monocytes | Ifi30   |
| 0          | 2.25581164 | 0.785 | 0.31  | 0 Monocytes | Ctsb    |
| 0          | 2.19104523 | 0.553 | 0.088 | 0 Monocytes | Grn     |
| 0          | 2.15444416 | 0.887 | 0.609 | 0 Monocytes | Gpx1    |
| 0          | 2.15105111 | 0.902 | 0.246 | 0 Monocytes | Fcer1g  |
| 0          | 1.99310088 | 0.458 | 0.045 | 0 Monocytes | Mafb    |
| 0          | 1.95837514 | 0.487 | 0.046 | 0 Monocytes | Aif1    |
| 0          | 1.94680567 | 0.62  | 0.083 | 0 Monocytes | Cd68    |
| 0          | 1.93454331 | 0.473 | 0.042 | 0 Monocytes | Fcgr4   |
| 0          | 1.87546778 | 0.538 | 0.129 | 0 Monocytes | Gngt2   |
| 0          | 1.86343278 | 0.778 | 0.312 | 0 Monocytes | Lgals3  |
| 0          | 1.86299275 | 0.627 | 0.148 | 0 Monocytes | Cybb    |
| 0          | 1.81003453 | 0.529 | 0.047 | 0 Monocytes | Csf1r   |
| 0          | 1.78473127 | 0.336 | 0.017 | 0 Monocytes | Ly6i    |
| 0          | 1.75762094 | 0.698 | 0.234 | 0 Monocytes | Ctsz    |
| 0          | 1.75020199 | 0.504 | 0.052 | 0 Monocytes | Mpeg1   |
| 0          | 1.73357819 | 0.593 | 0.102 | 0 Monocytes | Pld4    |
| 0          | 1.68832329 | 0.573 | 0.099 | 0 Monocytes | Fcgr3   |
| 0          | 1.6398724  | 0.46  | 0.027 | 0 Monocytes | Clec4a3 |
| 0          | 1.59423285 | 0.755 | 0.14  | 0 Monocytes | Alox5ap |
| 0          | 1.570592   | 0.373 | 0.037 | 0 Monocytes | Cxcl16  |
| 0          | 1.54680638 | 0.499 | 0.062 | 0 Monocytes | Plbd1   |
| 0          | 1.5306307  | 0.566 | 0.145 | 0 Monocytes | Cdkn1a  |
| 0          | 1.51505433 | 0.501 | 0.097 | 0 Monocytes | Plin2   |
| 0          | 1.50058005 | 0.762 | 0.143 | 0 Monocytes | Ifitm2  |
| 0          | 1.48638528 | 0.353 | 0.018 | 0 Monocytes | Nupr1   |

|           |            |       |       |           |           |          |
|-----------|------------|-------|-------|-----------|-----------|----------|
| 0         | 1.43927654 | 0.607 | 0.128 | 0         | Monocytes | Lst1     |
| 0         | 1.3798274  | 0.411 | 0.041 | 0         | Monocytes | Lair1    |
| 0         | 1.37473457 | 0.472 | 0.055 | 0         | Monocytes | Rassf4   |
| 0         | 1.36653952 | 0.337 | 0.019 | 0         | Monocytes | Lrp1     |
| 0         | 1.33445627 | 0.385 | 0.021 | 0         | Monocytes | Clec4a1  |
| 0         | 1.32824547 | 0.886 | 0.273 | 0         | Monocytes | Tyrobp   |
| 0         | 1.32354375 | 0.365 | 0.026 | 0         | Monocytes | Fcgr1    |
| 0         | 1.26183349 | 0.477 | 0.081 | 0         | Monocytes | Cd14     |
| 0         | 1.26011953 | 0.417 | 0.044 | 0         | Monocytes | Clec12a  |
| 0         | 1.20514998 | 0.375 | 0.033 | 0         | Monocytes | Sirpb1c  |
| 0         | 1.19818785 | 0.486 | 0.078 | 0         | Monocytes | Csf2ra   |
| 0         | 1.19264783 | 0.343 | 0.024 | 0         | Monocytes | Ifi204   |
| 0         | 1.11536903 | 0.966 | 0.922 | 0         | Monocytes | Ftl1     |
| 0         | 1.08811893 | 0.469 | 0.061 | 0         | Monocytes | Lrrc25   |
| 0         | 0.78775447 | 0.587 | 0.115 | 0         | Monocytes | Wfdc17   |
| 0         | 0.68386046 | 0.616 | 0.127 | 0         | Monocytes | Ccl6     |
| 0         | 0.36915327 | 0.628 | 0.137 | 0         | Monocytes | Il1b     |
| 2.45E-302 | 1.25492875 | 0.317 | 0.023 | 3.47E-298 | Monocytes | C3       |
| 3.51E-302 | 1.39020716 | 0.452 | 0.074 | 4.97E-298 | Monocytes | Pla2g7   |
| 4.38E-301 | 1.11039937 | 0.667 | 0.201 | 6.20E-297 | Monocytes | Spi1     |
| 5.32E-300 | 1.40832861 | 0.406 | 0.059 | 7.52E-296 | Monocytes | Ckb      |
| 6.02E-294 | 1.28354037 | 0.656 | 0.199 | 8.52E-290 | Monocytes | Atf3     |
| 1.52E-293 | 1.15444085 | 0.32  | 0.027 | 2.15E-289 | Monocytes | Sdc3     |
| 2.59E-292 | 1.09808667 | 0.379 | 0.049 | 3.67E-288 | Monocytes | BC028528 |
| 1.21E-290 | 1.20871725 | 0.409 | 0.061 | 1.71E-286 | Monocytes | App      |
| 4.24E-288 | 0.98656732 | 0.324 | 0.029 | 6.00E-284 | Monocytes | Pid1     |
| 1.24E-282 | 0.97069837 | 0.377 | 0.048 | 1.75E-278 | Monocytes | Cd300a   |
| 2.33E-281 | 1.4193871  | 0.329 | 0.032 | 3.30E-277 | Monocytes | Ifitm6   |
| 8.95E-281 | 1.39302458 | 0.362 | 0.049 | 1.27E-276 | Monocytes | Ms4a6d   |
| 1.27E-277 | 1.08294598 | 0.335 | 0.036 | 1.80E-273 | Monocytes | Naaa     |
| 1.64E-277 | 1.61287892 | 0.315 | 0.029 | 2.32E-273 | Monocytes | Ccl2     |
| 7.46E-276 | 0.84868804 | 0.273 | 0.015 | 1.06E-271 | Monocytes | Slamf8   |
| 2.40E-274 | 1.59428576 | 0.457 | 0.098 | 3.39E-270 | Monocytes | Mt1      |
| 2.77E-273 | 0.96960811 | 0.375 | 0.051 | 3.92E-269 | Monocytes | Sirpa    |
| 6.23E-273 | 0.91135649 | 0.281 | 0.018 | 8.82E-269 | Monocytes | Cd302    |
| 1.75E-264 | 1.06114286 | 0.402 | 0.067 | 2.47E-260 | Monocytes | Hck      |
| 4.94E-262 | 1.31428415 | 0.545 | 0.147 | 6.99E-258 | Monocytes | Ier3     |
| 6.84E-261 | 1.53169332 | 0.74  | 0.386 | 9.68E-257 | Monocytes | Prdx5    |
| 5.64E-259 | 1.6780147  | 0.456 | 0.105 | 7.98E-255 | Monocytes | Fcgr2b   |
| 9.64E-259 | 1.01142225 | 0.34  | 0.043 | 1.37E-254 | Monocytes | Slc11a1  |
| 2.47E-258 | 1.00321422 | 0.436 | 0.084 | 3.50E-254 | Monocytes | Pirb     |
| 4.82E-257 | 0.86837882 | 0.29  | 0.024 | 6.82E-253 | Monocytes | Klra2    |
| 1.44E-254 | 1.38356975 | 0.571 | 0.19  | 2.04E-250 | Monocytes | Anxa5    |
| 2.30E-254 | 1.86151827 | 0.461 | 0.111 | 3.25E-250 | Monocytes | Lgmn     |
| 7.44E-253 | 1.31643014 | 0.328 | 0.042 | 1.05E-248 | Monocytes | Ms4a4a   |
| 1.42E-251 | 0.8385394  | 0.292 | 0.028 | 2.02E-247 | Monocytes | Tmem106a |
| 2.02E-251 | 1.47294985 | 0.84  | 0.563 | 2.86E-247 | Monocytes | Vim      |
| 5.78E-250 | 0.87528195 | 0.261 | 0.017 | 8.19E-246 | Monocytes | Tppp3    |

|           |            |       |       |           |           |          |
|-----------|------------|-------|-------|-----------|-----------|----------|
| 3.09E-248 | 0.9287458  | 0.355 | 0.051 | 4.37E-244 | Monocytes | Tgm2     |
| 4.93E-246 | 1.664261   | 0.502 | 0.148 | 6.98E-242 | Monocytes | H2-DMb1  |
| 2.27E-245 | 1.35714509 | 0.724 | 0.407 | 3.22E-241 | Monocytes | Atox1    |
| 2.24E-244 | 1.02576174 | 0.25  | 0.015 | 3.17E-240 | Monocytes | Trem2    |
| 8.04E-243 | 1.28775301 | 0.603 | 0.205 | 1.14E-238 | Monocytes | Ctsh     |
| 1.18E-242 | 0.85846931 | 0.258 | 0.019 | 1.66E-238 | Monocytes | Hfe      |
| 2.50E-241 | 1.64530841 | 0.382 | 0.074 | 3.53E-237 | Monocytes | Gbp2     |
| 1.95E-237 | 1.03316647 | 0.344 | 0.05  | 2.76E-233 | Monocytes | Mgst1    |
| 1.95E-235 | 0.93909886 | 0.234 | 0.012 | 2.76E-231 | Monocytes | Dpep2    |
| 2.09E-234 | 0.94261058 | 0.253 | 0.019 | 2.96E-230 | Monocytes | Bcl2a1a  |
| 2.93E-233 | 1.03467138 | 0.223 | 0.01  | 4.15E-229 | Monocytes | Cfb      |
| 7.27E-233 | 0.74638945 | 0.222 | 0.009 | 1.03E-228 | Monocytes | Sirpb1a  |
| 8.61E-233 | 1.52145295 | 0.767 | 0.44  | 1.22E-228 | Monocytes | Sat1     |
| 4.95E-232 | 1.33861051 | 0.589 | 0.201 | 7.00E-228 | Monocytes | Ly86     |
| 1.95E-229 | 1.15529907 | 0.493 | 0.133 | 2.77E-225 | Monocytes | Zeb2     |
| 4.00E-229 | 0.99834657 | 0.875 | 0.776 | 5.66E-225 | Monocytes | Cyba     |
| 2.50E-228 | 0.74669528 | 0.263 | 0.023 | 3.54E-224 | Monocytes | P2ry6    |
| 3.78E-228 | 1.20004096 | 0.339 | 0.053 | 5.34E-224 | Monocytes | Hmox1    |
| 1.17E-227 | 1.16865512 | 0.245 | 0.018 | 1.65E-223 | Monocytes | Gatm     |
| 1.78E-227 | 1.42820512 | 0.266 | 0.026 | 2.52E-223 | Monocytes | Ms4a7    |
| 7.38E-227 | 2.02892303 | 0.598 | 0.252 | 1.04E-222 | Monocytes | Plac8    |
| 5.47E-225 | 0.72956079 | 0.215 | 0.009 | 7.75E-221 | Monocytes | Gpr141   |
| 4.29E-221 | 0.70263368 | 0.98  | 0.949 | 6.08E-217 | Monocytes | Fth1     |
| 4.03E-220 | 1.17243048 | 0.333 | 0.054 | 5.71E-216 | Monocytes | Tmem176b |
| 4.93E-220 | 0.79063648 | 0.301 | 0.04  | 6.98E-216 | Monocytes | Tubb6    |
| 2.66E-219 | 1.26275515 | 0.373 | 0.075 | 3.76E-215 | Monocytes | Ctsl     |
| 1.89E-217 | 1.89948747 | 0.206 | 0.008 | 2.67E-213 | Monocytes | Chil3    |
| 8.18E-217 | 1.1138973  | 0.868 | 0.699 | 1.16E-212 | Monocytes | Ucp2     |
| 1.23E-216 | 0.76455274 | 0.292 | 0.038 | 1.74E-212 | Monocytes | Acer3    |
| 3.00E-214 | 2.11895955 | 0.284 | 0.037 | 4.25E-210 | Monocytes | Cxcl10   |
| 3.86E-214 | 1.31964103 | 0.19  | 0.005 | 5.46E-210 | Monocytes | Ace      |
| 2.26E-213 | 0.77795424 | 0.326 | 0.051 | 3.21E-209 | Monocytes | Fgr      |
| 1.07E-212 | 1.07820439 | 0.287 | 0.037 | 1.51E-208 | Monocytes | Pltp     |
| 3.24E-212 | -1.6046319 | 0.194 | 0.568 | 4.59E-208 | Monocytes | Ets1     |
| 2.19E-210 | 1.40966596 | 0.195 | 0.007 | 3.10E-206 | Monocytes | Ear2     |
| 6.36E-209 | 0.4573056  | 0.618 | 0.224 | 9.01E-205 | Monocytes | Msrb1    |
| 1.54E-208 | 1.21201673 | 0.783 | 0.534 | 2.18E-204 | Monocytes | Npc2     |
| 2.90E-206 | 0.84527411 | 0.382 | 0.079 | 4.10E-202 | Monocytes | Marcks   |
| 3.47E-206 | 0.61633785 | 0.226 | 0.016 | 4.91E-202 | Monocytes | Ltbr     |
| 4.95E-205 | -0.8771193 | 0.863 | 0.891 | 7.01E-201 | Monocytes | Rpl13a   |
| 2.86E-204 | 0.96027835 | 0.391 | 0.088 | 4.05E-200 | Monocytes | Irf5     |
| 1.11E-203 | -1.8888171 | 0.35  | 0.647 | 1.57E-199 | Monocytes | Vps37b   |
| 6.77E-202 | 0.67763551 | 0.217 | 0.015 | 9.58E-198 | Monocytes | Plxn2    |
| 2.38E-201 | 1.05024998 | 0.272 | 0.036 | 3.37E-197 | Monocytes | Slamf9   |
| 6.24E-201 | 0.73893036 | 0.206 | 0.012 | 8.84E-197 | Monocytes | Il18bp   |
| 6.59E-201 | 0.85957848 | 0.449 | 0.119 | 9.33E-197 | Monocytes | Creg1    |
| 7.02E-199 | 0.68355066 | 0.299 | 0.045 | 9.94E-195 | Monocytes | Fes      |
| 2.20E-198 | 0.64209681 | 0.268 | 0.033 | 3.12E-194 | Monocytes | Igsf6    |

|           |            |       |       |           |           |          |
|-----------|------------|-------|-------|-----------|-----------|----------|
| 2.77E-198 | 0.85823694 | 0.333 | 0.061 | 3.92E-194 | Monocytes | Apobec1  |
| 6.97E-196 | 0.60385062 | 0.201 | 0.012 | 9.87E-192 | Monocytes | Tmem51   |
| 2.09E-195 | 0.79241692 | 0.541 | 0.177 | 2.96E-191 | Monocytes | Lilrb4a  |
| 3.21E-193 | 1.17301862 | 0.796 | 0.612 | 4.54E-189 | Monocytes | Atp6v0c  |
| 8.10E-193 | 0.97422033 | 0.336 | 0.068 | 1.15E-188 | Monocytes | Asah1    |
| 3.69E-192 | 1.13583663 | 0.242 | 0.027 | 5.23E-188 | Monocytes | Iigp1    |
| 4.80E-191 | 2.2002702  | 0.21  | 0.016 | 6.79E-187 | Monocytes | Ccl8     |
| 6.14E-190 | 1.56624719 | 0.711 | 0.414 | 8.70E-186 | Monocytes | H2-Ab1   |
| 1.15E-189 | 0.71619939 | 0.235 | 0.024 | 1.63E-185 | Monocytes | Rasa4    |
| 1.70E-189 | 0.85595457 | 0.192 | 0.01  | 2.40E-185 | Monocytes | Ifi205   |
| 4.93E-188 | 1.1565497  | 0.576 | 0.232 | 6.99E-184 | Monocytes | Rrbp1    |
| 7.20E-188 | -1.2917632 | 0.868 | 0.919 | 1.02E-183 | Monocytes | Rps27    |
| 1.04E-187 | 0.6004767  | 0.218 | 0.019 | 1.48E-183 | Monocytes | Acvrl1   |
| 8.52E-187 | -0.8431905 | 0.916 | 0.912 | 1.21E-182 | Monocytes | Rps15a   |
| 9.19E-187 | 0.82623642 | 0.291 | 0.047 | 1.30E-182 | Monocytes | Ccl9     |
| 1.01E-186 | 0.5872317  | 0.3   | 0.049 | 1.43E-182 | Monocytes | Csf2rb   |
| 3.32E-186 | 0.7281213  | 0.254 | 0.032 | 4.69E-182 | Monocytes | Clec4a2  |
| 8.99E-186 | 0.75030355 | 0.4   | 0.1   | 1.27E-181 | Monocytes | Eif4ebp1 |
| 3.90E-184 | 1.4398342  | 0.615 | 0.289 | 5.53E-180 | Monocytes | Ctsc     |
| 1.94E-183 | 0.65713915 | 0.199 | 0.014 | 2.74E-179 | Monocytes | Cebpa    |
| 3.18E-182 | 0.77543745 | 0.461 | 0.137 | 4.50E-178 | Monocytes | Tnfrsf1a |
| 1.77E-181 | 0.76679508 | 0.272 | 0.041 | 2.50E-177 | Monocytes | Tlr2     |
| 5.56E-181 | 0.69329407 | 0.276 | 0.043 | 7.87E-177 | Monocytes | Fcgrt    |
| 1.54E-180 | -2.6768138 | 0.039 | 0.371 | 2.18E-176 | Monocytes | Ccr7     |
| 3.31E-180 | 0.92533503 | 0.176 | 0.008 | 4.69E-176 | Monocytes | Trem14   |
| 1.00E-179 | 0.48791015 | 0.186 | 0.011 | 1.42E-175 | Monocytes | Tifab    |
| 2.28E-179 | 0.71124558 | 0.244 | 0.03  | 3.22E-175 | Monocytes | Ltb4r1   |
| 1.86E-177 | 0.55990958 | 0.191 | 0.013 | 2.63E-173 | Monocytes | Ptpro    |
| 2.15E-177 | 0.64218198 | 0.214 | 0.021 | 3.04E-173 | Monocytes | Rab7b    |
| 2.79E-177 | 0.59127311 | 0.205 | 0.018 | 3.95E-173 | Monocytes | Batf3    |
| 1.19E-175 | 0.70522536 | 0.28  | 0.045 | 1.68E-171 | Monocytes | Emilin2  |
| 9.38E-174 | 0.74118726 | 0.365 | 0.086 | 1.33E-169 | Monocytes | Skap2    |
| 1.30E-173 | -1.5776135 | 0.17  | 0.501 | 1.84E-169 | Monocytes | Gimap6   |
| 9.57E-173 | 0.92139785 | 0.22  | 0.024 | 1.35E-168 | Monocytes | Gm9733   |
| 1.45E-170 | -1.2547958 | 0.269 | 0.625 | 2.05E-166 | Monocytes | Ptprcap  |
| 1.20E-169 | -0.8418423 | 0.869 | 0.897 | 1.70E-165 | Monocytes | Rpl21    |
| 1.52E-169 | 1.00019235 | 0.345 | 0.083 | 2.15E-165 | Monocytes | Tcirg1   |
| 8.82E-169 | 0.9663366  | 0.516 | 0.193 | 1.25E-164 | Monocytes | Gm2a     |
| 8.93E-169 | 0.6809453  | 0.229 | 0.028 | 1.26E-164 | Monocytes | Adgre1   |
| 1.12E-167 | 0.66452367 | 0.287 | 0.053 | 1.59E-163 | Monocytes | Oas1a    |
| 2.72E-167 | 0.68826596 | 0.271 | 0.045 | 3.85E-163 | Monocytes | Cfp      |
| 8.17E-167 | -0.825548  | 0.864 | 0.906 | 1.16E-162 | Monocytes | Rps21    |
| 2.44E-165 | 0.42391158 | 0.301 | 0.056 | 3.46E-161 | Monocytes | Gda      |
| 3.50E-165 | 0.8721045  | 0.916 | 0.543 | 4.96E-161 | Monocytes | Cd74     |
| 4.05E-162 | 1.42535827 | 0.715 | 0.426 | 5.73E-158 | Monocytes | H2-Eb1   |
| 1.43E-161 | -0.7471071 | 0.951 | 0.935 | 2.03E-157 | Monocytes | Rps24    |
| 2.65E-161 | 0.54821495 | 0.234 | 0.033 | 3.75E-157 | Monocytes | Adssl1   |
| 1.70E-160 | -1.0750461 | 0.672 | 0.788 | 2.41E-156 | Monocytes | Rpl12    |

|           |            |       |       |           |           |           |
|-----------|------------|-------|-------|-----------|-----------|-----------|
| 1.92E-160 | 0.51476347 | 0.203 | 0.021 | 2.71E-156 | Monocytes | Adam15    |
| 3.56E-160 | -1.3258085 | 0.393 | 0.658 | 5.04E-156 | Monocytes | Cd37      |
| 3.62E-160 | 0.54929218 | 0.217 | 0.026 | 5.13E-156 | Monocytes | Plod3     |
| 1.82E-159 | 0.68533678 | 0.171 | 0.012 | 2.58E-155 | Monocytes | Gm21188   |
| 1.88E-159 | 0.88545164 | 0.464 | 0.16  | 2.67E-155 | Monocytes | Zbp1      |
| 4.05E-158 | -0.6998346 | 0.86  | 0.897 | 5.73E-154 | Monocytes | Rps13     |
| 4.09E-158 | 0.96570892 | 0.342 | 0.09  | 5.79E-154 | Monocytes | Cndp2     |
| 6.62E-157 | 0.92829628 | 0.537 | 0.211 | 9.37E-153 | Monocytes | Nfe2l2    |
| 1.47E-156 | 0.6726194  | 0.276 | 0.052 | 2.08E-152 | Monocytes | Basp1     |
| 3.17E-156 | 0.67845567 | 0.143 | 0.004 | 4.49E-152 | Monocytes | F10       |
| 1.05E-155 | 0.58396494 | 0.167 | 0.011 | 1.48E-151 | Monocytes | Mmp14     |
| 5.65E-155 | 0.50359769 | 0.174 | 0.014 | 8.00E-151 | Monocytes | Ppfia4    |
| 8.31E-155 | 0.49784796 | 0.184 | 0.017 | 1.18E-150 | Monocytes | Tbxas1    |
| 3.30E-154 | -3.2515049 | 0.034 | 0.325 | 4.67E-150 | Monocytes | Cd79a     |
| 7.20E-154 | 0.65200554 | 0.203 | 0.024 | 1.02E-149 | Monocytes | C3ar1     |
| 1.24E-153 | 0.69899883 | 0.277 | 0.055 | 1.75E-149 | Monocytes | Snx10     |
| 1.17E-152 | 0.53631046 | 0.201 | 0.023 | 1.65E-148 | Monocytes | Tifa      |
| 3.40E-152 | 0.49958265 | 0.297 | 0.062 | 4.82E-148 | Monocytes | Nfam1     |
| 3.71E-152 | 0.61934185 | 0.248 | 0.042 | 5.25E-148 | Monocytes | Naga      |
| 3.75E-152 | 0.55549601 | 0.188 | 0.018 | 5.31E-148 | Monocytes | Tlr13     |
| 4.58E-152 | 0.87126172 | 0.362 | 0.102 | 6.48E-148 | Monocytes | Trafd1    |
| 5.19E-152 | 0.86042065 | 0.858 | 0.811 | 7.35E-148 | Monocytes | Itm2b     |
| 4.09E-151 | 0.50769472 | 0.148 | 0.006 | 5.80E-147 | Monocytes | Tnfsf13   |
| 8.03E-151 | 0.58260214 | 0.186 | 0.019 | 1.14E-146 | Monocytes | Ccdc88a   |
| 1.42E-150 | 0.6377685  | 0.301 | 0.067 | 2.01E-146 | Monocytes | Xdh       |
| 1.75E-150 | 0.75832878 | 0.365 | 0.1   | 2.47E-146 | Monocytes | Hexa      |
| 1.91E-150 | 0.55271425 | 0.231 | 0.035 | 2.70E-146 | Monocytes | Tep1      |
| 1.22E-149 | 0.43307068 | 0.301 | 0.064 | 1.73E-145 | Monocytes | Clec4e    |
| 1.97E-149 | 0.486783   | 0.176 | 0.015 | 2.79E-145 | Monocytes | Itgb5     |
| 1.99E-148 | 0.67857246 | 0.157 | 0.01  | 2.82E-144 | Monocytes | Gbp2b     |
| 2.83E-148 | 0.45681388 | 0.181 | 0.018 | 4.01E-144 | Monocytes | Scarb1    |
| 3.05E-148 | 0.59815371 | 0.202 | 0.025 | 4.32E-144 | Monocytes | Slc31a2   |
| 1.17E-147 | 0.50800447 | 0.152 | 0.008 | 1.65E-143 | Monocytes | Tcf7l2    |
| 1.12E-146 | -1.0164718 | 0.616 | 0.772 | 1.59E-142 | Monocytes | Shisa5    |
| 2.09E-146 | 0.58311585 | 0.175 | 0.016 | 2.95E-142 | Monocytes | Ldlr      |
| 4.21E-146 | 0.47113201 | 0.154 | 0.009 | 5.96E-142 | Monocytes | Cttnbp2nl |
| 6.18E-146 | 0.44451335 | 0.181 | 0.018 | 8.75E-142 | Monocytes | Zeb2os    |
| 1.51E-145 | 0.49476937 | 0.35  | 0.089 | 2.14E-141 | Monocytes | Hp        |
| 3.16E-145 | -0.6266072 | 0.903 | 0.929 | 4.47E-141 | Monocytes | Rpl30     |
| 3.55E-145 | 0.45741312 | 0.168 | 0.014 | 5.03E-141 | Monocytes | Itga5     |
| 7.73E-144 | 1.39031218 | 0.143 | 0.007 | 1.09E-139 | Monocytes | Arg1      |
| 1.04E-143 | -1.21382   | 0.245 | 0.564 | 1.48E-139 | Monocytes | Cd2       |
| 1.67E-143 | 0.8048365  | 0.237 | 0.041 | 2.36E-139 | Monocytes | Tmem176a  |
| 3.37E-143 | -2.3146255 | 0.021 | 0.295 | 4.77E-139 | Monocytes | Ebf1      |
| 5.30E-143 | 0.50738065 | 0.136 | 0.005 | 7.50E-139 | Monocytes | Anpep     |
| 7.81E-142 | 1.22511328 | 0.534 | 0.249 | 1.11E-137 | Monocytes | Lamp1     |
| 1.69E-141 | 0.87262125 | 0.576 | 0.264 | 2.39E-137 | Monocytes | Efhd2     |
| 2.69E-141 | 0.68840247 | 0.127 | 0.003 | 3.81E-137 | Monocytes | Adgre4    |

|           |            |       |       |           |           |          |
|-----------|------------|-------|-------|-----------|-----------|----------|
| 2.09E-140 | 0.63796163 | 0.312 | 0.077 | 2.96E-136 | Monocytes | Etv6     |
| 2.11E-140 | -0.6997274 | 0.9   | 0.905 | 2.99E-136 | Monocytes | Rps7     |
| 3.64E-140 | 0.77545217 | 0.392 | 0.123 | 5.15E-136 | Monocytes | Lamp2    |
| 4.01E-140 | 0.93650597 | 0.139 | 0.007 | 5.68E-136 | Monocytes | Apoc2    |
| 3.99E-139 | 0.53280231 | 0.167 | 0.015 | 5.64E-135 | Monocytes | Myof     |
| 4.27E-139 | 0.50535293 | 0.335 | 0.092 | 6.04E-135 | Monocytes | Ccrl2    |
| 4.30E-138 | -0.6026253 | 0.923 | 0.932 | 6.09E-134 | Monocytes | Rps3a1   |
| 1.84E-137 | 0.52298422 | 0.161 | 0.014 | 2.60E-133 | Monocytes | Creb5    |
| 7.91E-137 | 0.77232645 | 0.495 | 0.194 | 1.12E-132 | Monocytes | Ifnar2   |
| 9.50E-137 | 0.67554679 | 0.232 | 0.043 | 1.34E-132 | Monocytes | Anxa4    |
| 2.42E-136 | 0.53306763 | 0.268 | 0.056 | 3.42E-132 | Monocytes | Ilgam    |
| 3.04E-136 | 0.67927763 | 0.304 | 0.074 | 4.30E-132 | Monocytes | Rnase6   |
| 5.77E-136 | -1.2712899 | 0.261 | 0.558 | 8.17E-132 | Monocytes | Ltb      |
| 5.79E-136 | 0.4553998  | 0.271 | 0.057 | 8.19E-132 | Monocytes | Pilra    |
| 6.35E-135 | 0.98359754 | 0.137 | 0.007 | 8.99E-131 | Monocytes | Fn1      |
| 8.51E-135 | 0.91621466 | 0.567 | 0.271 | 1.20E-130 | Monocytes | Ctsa     |
| 1.75E-134 | -0.7063434 | 0.889 | 0.894 | 2.48E-130 | Monocytes | Rpl39    |
| 3.95E-134 | 0.8612684  | 0.468 | 0.187 | 5.60E-130 | Monocytes | Rnh1     |
| 1.07E-132 | 0.83326517 | 0.826 | 0.583 | 1.52E-128 | Monocytes | Fos      |
| 2.97E-132 | 0.46010825 | 0.372 | 0.112 | 4.21E-128 | Monocytes | Trib1    |
| 3.47E-132 | 0.51403986 | 0.167 | 0.017 | 4.92E-128 | Monocytes | Atp1a3   |
| 1.26E-131 | -0.7985731 | 0.815 | 0.875 | 1.78E-127 | Monocytes | Rpl17    |
| 2.65E-131 | 0.41733471 | 0.189 | 0.025 | 3.75E-127 | Monocytes | Milr1    |
| 3.03E-130 | -0.6509689 | 0.844 | 0.88  | 4.29E-126 | Monocytes | Rpl36    |
| 3.31E-130 | 0.49340122 | 0.178 | 0.022 | 4.68E-126 | Monocytes | Hk3      |
| 4.81E-130 | 0.42743866 | 0.13  | 0.006 | 6.81E-126 | Monocytes | Sh3pxd2b |
| 6.44E-130 | 0.78748787 | 0.268 | 0.063 | 9.12E-126 | Monocytes | Irgm1    |
| 1.03E-129 | 0.74750149 | 0.41  | 0.142 | 1.46E-125 | Monocytes | Ninj1    |
| 5.03E-129 | 0.4514054  | 0.203 | 0.032 | 7.12E-125 | Monocytes | Cmtm3    |
| 2.05E-128 | 0.40796278 | 0.18  | 0.023 | 2.91E-124 | Monocytes | Rab32    |
| 3.34E-128 | 0.4397189  | 0.217 | 0.038 | 4.73E-124 | Monocytes | Ebi3     |
| 4.54E-128 | 0.45957999 | 0.167 | 0.018 | 6.42E-124 | Monocytes | Gpr35    |
| 4.93E-127 | -1.0438748 | 0.216 | 0.502 | 6.98E-123 | Monocytes | 1-Sep    |
| 9.25E-127 | 0.70364176 | 0.227 | 0.044 | 1.31E-122 | Monocytes | Atp13a2  |
| 1.11E-126 | 0.60674418 | 0.335 | 0.099 | 1.57E-122 | Monocytes | Gusb     |
| 1.18E-126 | 0.58764272 | 0.343 | 0.1   | 1.68E-122 | Monocytes | Lmo4     |
| 2.68E-126 | 0.44439779 | 0.137 | 0.009 | 3.79E-122 | Monocytes | Msr1     |
| 9.17E-126 | 0.60870525 | 0.309 | 0.083 | 1.30E-121 | Monocytes | Il6ra    |
| 4.12E-125 | 1.57611054 | 0.133 | 0.009 | 5.83E-121 | Monocytes | Fabp4    |
| 6.45E-125 | 0.55860074 | 0.246 | 0.052 | 9.13E-121 | Monocytes | Scimp    |
| 9.01E-125 | 1.00026557 | 0.687 | 0.421 | 1.27E-120 | Monocytes | Samhd1   |
| 1.22E-124 | -2.2409531 | 0.029 | 0.282 | 1.73E-120 | Monocytes | Ly6d     |
| 1.32E-124 | -1.4428795 | 0.028 | 0.276 | 1.87E-120 | Monocytes | Satb1    |
| 2.55E-124 | 0.39812867 | 0.14  | 0.011 | 3.62E-120 | Monocytes | Shtn1    |
| 3.52E-124 | 0.48402545 | 0.149 | 0.013 | 4.98E-120 | Monocytes | Tns3     |
| 3.87E-123 | -1.2655966 | 0.129 | 0.395 | 5.48E-119 | Monocytes | Ablim1   |
| 4.68E-123 | -0.5778412 | 0.902 | 0.92  | 6.62E-119 | Monocytes | Rps10    |
| 8.68E-123 | 0.41556887 | 0.358 | 0.112 | 1.23E-118 | Monocytes | Rnf149   |

|           |            |       |       |           |           |           |
|-----------|------------|-------|-------|-----------|-----------|-----------|
| 1.06E-122 | 0.85405777 | 0.47  | 0.191 | 1.50E-118 | Monocytes | Clic4     |
| 1.27E-122 | -1.0532838 | 0.674 | 0.82  | 1.79E-118 | Monocytes | Jund      |
| 2.05E-122 | 0.55055158 | 0.942 | 0.918 | 2.91E-118 | Monocytes | B2m       |
| 2.94E-122 | 0.31980848 | 0.145 | 0.012 | 4.17E-118 | Monocytes | Ugt1a7c   |
| 8.72E-122 | 0.60020163 | 0.202 | 0.035 | 1.23E-117 | Monocytes | Hk2       |
| 9.85E-122 | 0.49206302 | 0.131 | 0.009 | 1.40E-117 | Monocytes | Tbc1d9    |
| 2.74E-121 | 0.54925907 | 0.23  | 0.046 | 3.88E-117 | Monocytes | Il1rn     |
| 2.75E-121 | -0.5372785 | 0.887 | 0.967 | 3.89E-117 | Monocytes | Eif1      |
| 4.70E-121 | -0.6041924 | 0.874 | 0.912 | 6.65E-117 | Monocytes | Rpl8      |
| 5.76E-121 | 0.45567552 | 0.235 | 0.048 | 8.16E-117 | Monocytes | Lpcat2    |
| 6.94E-121 | -0.5368318 | 0.941 | 0.945 | 9.83E-117 | Monocytes | Uba52     |
| 1.62E-120 | 0.94463291 | 0.726 | 0.526 | 2.29E-116 | Monocytes | Tspo      |
| 1.81E-120 | 0.94137338 | 0.538 | 0.248 | 2.56E-116 | Monocytes | Napsa     |
| 8.24E-120 | -0.5581139 | 0.928 | 0.94  | 1.17E-115 | Monocytes | Rpl18a    |
| 9.06E-120 | 0.97447727 | 0.528 | 0.254 | 1.28E-115 | Monocytes | Pnp       |
| 1.32E-119 | 0.47034171 | 0.123 | 0.007 | 1.87E-115 | Monocytes | Arhgef10l |
| 1.72E-119 | -1.7485096 | 0.008 | 0.239 | 2.44E-115 | Monocytes | Fcmr      |
| 2.28E-119 | 1.00297561 | 0.562 | 0.297 | 3.22E-115 | Monocytes | H2-DMA    |
| 2.47E-119 | 0.82637382 | 0.158 | 0.019 | 3.50E-115 | Monocytes | Eno3      |
| 2.55E-119 | 0.38269317 | 0.182 | 0.027 | 3.61E-115 | Monocytes | Aldh3b1   |
| 2.94E-119 | 0.46206277 | 0.107 | 0.002 | 4.16E-115 | Monocytes | Zfyve9    |
| 3.49E-119 | 0.78078542 | 0.782 | 0.555 | 4.93E-115 | Monocytes | Zfp36     |
| 5.09E-119 | -0.6553235 | 0.903 | 0.908 | 7.21E-115 | Monocytes | Rplp1     |
| 1.35E-118 | 0.71572002 | 0.295 | 0.082 | 1.91E-114 | Monocytes | Ccr2      |
| 2.15E-118 | 0.42485399 | 0.12  | 0.006 | 3.04E-114 | Monocytes | Adap2     |
| 2.31E-118 | 0.50851213 | 0.248 | 0.055 | 3.27E-114 | Monocytes | Cd300lf   |
| 3.86E-118 | 0.46580479 | 0.192 | 0.032 | 5.47E-114 | Monocytes | S100a1    |
| 3.97E-118 | 0.35844444 | 0.131 | 0.009 | 5.61E-114 | Monocytes | Csf2rb2   |
| 5.07E-118 | 0.93989999 | 0.55  | 0.266 | 7.18E-114 | Monocytes | Tpi1      |
| 6.23E-118 | 1.30035129 | 0.62  | 0.4   | 8.81E-114 | Monocytes | Ly6a      |
| 1.18E-117 | -1.4182913 | 0.017 | 0.25  | 1.67E-113 | Monocytes | Cd55      |
| 1.45E-117 | 0.45709486 | 0.336 | 0.1   | 2.05E-113 | Monocytes | Anxa1     |
| 3.57E-117 | 0.30389678 | 0.223 | 0.043 | 5.05E-113 | Monocytes | Sirpb1b   |
| 3.71E-117 | 0.63082046 | 0.295 | 0.083 | 5.25E-113 | Monocytes | Casp1     |
| 1.13E-116 | 0.36898464 | 0.281 | 0.071 | 1.60E-112 | Monocytes | Cd300ld   |
| 1.60E-116 | 0.3410765  | 0.219 | 0.043 | 2.26E-112 | Monocytes | Ogfrl1    |
| 2.09E-116 | 0.75708836 | 0.517 | 0.225 | 2.95E-112 | Monocytes | Il10ra    |
| 2.94E-116 | 0.85128273 | 0.176 | 0.027 | 4.17E-112 | Monocytes | Ecm1      |
| 3.32E-116 | 0.60474163 | 0.183 | 0.029 | 4.69E-112 | Monocytes | Cbfa2t3   |
| 3.92E-116 | 0.44535789 | 0.12  | 0.006 | 5.55E-112 | Monocytes | Gm4951    |
| 4.97E-116 | 0.42965703 | 0.177 | 0.026 | 7.03E-112 | Monocytes | Camk1     |
| 9.53E-116 | 0.48285364 | 0.15  | 0.016 | 1.35E-111 | Monocytes | Ccnd1     |
| 2.45E-115 | 0.98959845 | 0.722 | 0.431 | 3.47E-111 | Monocytes | H2-Aa     |
| 2.52E-115 | -0.7357667 | 0.919 | 0.896 | 3.56E-111 | Monocytes | Rps20     |
| 3.86E-115 | 0.32776937 | 0.122 | 0.007 | 5.47E-111 | Monocytes | F11r      |
| 7.32E-115 | 0.64732774 | 0.312 | 0.093 | 1.04E-110 | Monocytes | Abi3      |
| 1.61E-114 | -1.6056527 | 0.008 | 0.231 | 2.28E-110 | Monocytes | Ms4a1     |
| 1.91E-114 | 0.39558785 | 0.221 | 0.045 | 2.70E-110 | Monocytes | Oasl2     |



|           |            |       |       |           |           |          |
|-----------|------------|-------|-------|-----------|-----------|----------|
| 2.98E-114 | 0.58695933 | 0.264 | 0.067 | 4.22E-110 | Monocytes | Cyfp1    |
| 5.45E-114 | 1.04689841 | 0.481 | 0.215 | 7.72E-110 | Monocytes | Socs3    |
| 7.91E-114 | 0.32972098 | 0.257 | 0.061 | 1.12E-109 | Monocytes | Slc15a3  |
| 1.04E-113 | -1.4578369 | 0.034 | 0.267 | 1.48E-109 | Monocytes | S1pr1    |
| 2.01E-113 | 0.63110023 | 0.397 | 0.144 | 2.85E-109 | Monocytes | Znhit1   |
| 2.08E-113 | 0.48078217 | 0.163 | 0.022 | 2.95E-109 | Monocytes | Aoah     |
| 5.96E-113 | 0.5129605  | 0.138 | 0.013 | 8.44E-109 | Monocytes | Cdc42ep2 |
| 7.26E-113 | -1.1664011 | 0.713 | 0.815 | 1.03E-108 | Monocytes | Btg1     |
| 9.23E-113 | 0.37240581 | 0.129 | 0.01  | 1.31E-108 | Monocytes | Phf11d   |
| 8.21E-112 | -0.5428709 | 0.893 | 0.927 | 1.16E-107 | Monocytes | Rpl9-ps6 |
| 8.90E-112 | 0.86289758 | 0.631 | 0.342 | 1.26E-107 | Monocytes | Irf1     |
| 8.92E-112 | 0.85921396 | 0.389 | 0.144 | 1.26E-107 | Monocytes | Ms4a4c   |
| 2.10E-111 | 0.51507931 | 0.731 | 0.511 | 2.97E-107 | Monocytes | Cebpb    |
| 2.11E-111 | 0.35745584 | 0.124 | 0.009 | 2.99E-107 | Monocytes | Tnfrsf21 |
| 2.79E-111 | 0.56497485 | 0.361 | 0.123 | 3.95E-107 | Monocytes | Ptpre    |
| 3.44E-111 | 0.89585638 | 0.409 | 0.163 | 4.86E-107 | Monocytes | Smpdl3a  |
| 3.76E-111 | 0.90105041 | 0.591 | 0.33  | 5.32E-107 | Monocytes | Akr1a1   |
| 7.84E-111 | 0.56064121 | 0.29  | 0.082 | 1.11E-106 | Monocytes | Gyg      |
| 3.30E-110 | 0.28466079 | 0.118 | 0.007 | 4.67E-106 | Monocytes | Guca1a   |
| 4.35E-110 | 0.67986038 | 0.402 | 0.148 | 6.16E-106 | Monocytes | Cyp4f18  |
| 4.50E-110 | 0.39247079 | 0.466 | 0.182 | 6.37E-106 | Monocytes | Tpd52    |
| 5.56E-110 | -0.5415249 | 0.932 | 0.945 | 7.87E-106 | Monocytes | Rps16    |
| 1.08E-109 | 0.36594749 | 0.19  | 0.034 | 1.53E-105 | Monocytes | Ralb     |
| 1.24E-109 | 0.40812818 | 0.172 | 0.027 | 1.76E-105 | Monocytes | Rbm47    |
| 1.25E-109 | 0.55444666 | 0.161 | 0.022 | 1.77E-105 | Monocytes | Id1      |
| 1.39E-109 | 0.42094828 | 0.239 | 0.055 | 1.96E-105 | Monocytes | Gng12    |
| 2.37E-109 | 0.57284258 | 0.262 | 0.069 | 3.35E-105 | Monocytes | Casp4    |
| 3.71E-109 | 0.39179265 | 0.181 | 0.03  | 5.26E-105 | Monocytes | Pira2    |
| 4.40E-109 | 0.53976524 | 0.195 | 0.036 | 6.24E-105 | Monocytes | Slfn5    |
| 8.73E-109 | 0.44451763 | 0.22  | 0.047 | 1.24E-104 | Monocytes | Dusp3    |
| 1.11E-108 | 0.4294183  | 0.144 | 0.016 | 1.58E-104 | Monocytes | Axl      |
| 1.13E-108 | 0.30861919 | 0.123 | 0.009 | 1.60E-104 | Monocytes | Hsd3b7   |
| 1.49E-108 | 0.77113705 | 0.656 | 0.384 | 2.11E-104 | Monocytes | Vamp8    |
| 1.89E-108 | 0.68178939 | 0.378 | 0.137 | 2.67E-104 | Monocytes | Ppt1     |
| 2.41E-108 | 0.43530215 | 0.15  | 0.019 | 3.41E-104 | Monocytes | Acp2     |
| 2.97E-108 | -0.4838994 | 0.936 | 0.953 | 4.20E-104 | Monocytes | Gm10076  |
| 2.15E-107 | -0.2593942 | 0.295 | 0.081 | 3.04E-103 | Monocytes | Tnfaip2  |
| 2.25E-107 | 0.4302162  | 0.103 | 0.004 | 3.19E-103 | Monocytes | Ms4a8a   |
| 2.66E-107 | 0.82970263 | 0.551 | 0.289 | 3.77E-103 | Monocytes | Cstb     |
| 4.51E-107 | -0.5473319 | 0.882 | 0.898 | 6.38E-103 | Monocytes | Rpl27a   |
| 5.75E-107 | 0.73432052 | 0.423 | 0.168 | 8.14E-103 | Monocytes | Prkcd    |
| 6.98E-107 | 0.54809279 | 0.259 | 0.068 | 9.89E-103 | Monocytes | Bach1    |
| 7.16E-107 | 0.39156239 | 0.124 | 0.01  | 1.01E-102 | Monocytes | Stom     |
| 1.07E-106 | -0.5827248 | 0.901 | 0.914 | 1.51E-102 | Monocytes | Rpl37a   |
| 3.03E-106 | 0.36772521 | 0.164 | 0.024 | 4.29E-102 | Monocytes | Pdlim4   |
| 3.63E-106 | 0.31473042 | 0.143 | 0.016 | 5.14E-102 | Monocytes | Pak1     |
| 3.72E-106 | 0.37199384 | 0.215 | 0.045 | 5.27E-102 | Monocytes | Trf      |
| 1.07E-105 | 0.61609018 | 0.325 | 0.104 | 1.51E-101 | Monocytes | Blvrb    |

|           |            |       |       |           |           |              |
|-----------|------------|-------|-------|-----------|-----------|--------------|
| 1.54E-105 | -1.1642449 | 0.127 | 0.366 | 2.18E-101 | Monocytes | Gm8369       |
| 1.77E-105 | 0.87771212 | 0.528 | 0.26  | 2.50E-101 | Monocytes | Bst2         |
| 2.39E-105 | 0.60897459 | 0.372 | 0.133 | 3.38E-101 | Monocytes | Picalm       |
| 3.77E-105 | 0.56333522 | 0.955 | 0.91  | 5.34E-101 | Monocytes | Gapdh        |
| 5.75E-105 | 0.64316354 | 0.277 | 0.079 | 8.13E-101 | Monocytes | Nampt        |
| 2.42E-104 | -0.6657284 | 0.855 | 0.888 | 3.42E-100 | Monocytes | Rpl38        |
| 3.13E-104 | 0.40357187 | 0.148 | 0.019 | 4.43E-100 | Monocytes | Eps8         |
| 4.51E-104 | 0.70457257 | 0.382 | 0.145 | 6.38E-100 | Monocytes | Ly6c2        |
| 1.29E-103 | 0.50186102 | 0.251 | 0.066 | 1.82E-99  | Monocytes | Mvp          |
| 2.04E-103 | 0.67982328 | 0.336 | 0.116 | 2.88E-99  | Monocytes | Gadd45g      |
| 2.29E-103 | -0.4965876 | 0.951 | 0.933 | 3.24E-99  | Monocytes | Rpl13        |
| 3.80E-103 | -0.5552558 | 0.949 | 0.92  | 5.38E-99  | Monocytes | Rpsa         |
| 4.54E-103 | 0.50429156 | 0.332 | 0.11  | 6.43E-99  | Monocytes | Evi2a        |
| 4.76E-103 | 0.33083819 | 0.134 | 0.014 | 6.74E-99  | Monocytes | Zfp385a      |
| 6.27E-103 | -0.5281517 | 0.894 | 0.911 | 8.87E-99  | Monocytes | Rps3         |
| 3.25E-102 | 0.39507515 | 0.12  | 0.01  | 4.60E-98  | Monocytes | Sash1        |
| 7.37E-102 | -0.8937846 | 0.616 | 0.754 | 1.04E-97  | Monocytes | Pnrc1        |
| 9.98E-102 | 0.33903674 | 0.112 | 0.008 | 1.41E-97  | Monocytes | Krt80        |
| 1.23E-101 | 0.4769011  | 0.218 | 0.051 | 1.74E-97  | Monocytes | Cers6        |
| 1.23E-101 | -1.3061664 | 0.006 | 0.207 | 1.74E-97  | Monocytes | Cd19         |
| 1.31E-101 | 0.27412967 | 0.111 | 0.007 | 1.86E-97  | Monocytes | Cpq          |
| 1.76E-101 | 0.37838011 | 0.136 | 0.016 | 2.49E-97  | Monocytes | Dram1        |
| 2.36E-101 | 0.77440364 | 0.581 | 0.317 | 3.34E-97  | Monocytes | Psmb10       |
| 3.63E-101 | 0.74393718 | 0.639 | 0.36  | 5.14E-97  | Monocytes | Fyb          |
| 9.64E-101 | 0.33632045 | 0.174 | 0.031 | 1.36E-96  | Monocytes | Dnase1l1     |
| 2.67E-100 | 0.38944877 | 0.221 | 0.052 | 3.79E-96  | Monocytes | Rab20        |
| 3.09E-100 | 0.53896063 | 0.317 | 0.106 | 4.37E-96  | Monocytes | Gsdmd        |
| 5.00E-100 | 0.33240103 | 0.125 | 0.012 | 7.08E-96  | Monocytes | I830077J02Ri |
| 5.07E-100 | 0.53936942 | 0.316 | 0.105 | 7.18E-96  | Monocytes | Ap1s2        |
| 1.02E-99  | 0.86963264 | 0.279 | 0.087 | 1.45E-95  | Monocytes | Sdc4         |
| 1.03E-99  | 0.36405458 | 0.146 | 0.02  | 1.46E-95  | Monocytes | Sh2d1b1      |
| 1.14E-99  | 0.39790493 | 0.105 | 0.006 | 1.61E-95  | Monocytes | Mertk        |
| 1.47E-99  | 0.76329186 | 0.551 | 0.272 | 2.08E-95  | Monocytes | Unc93b1      |
| 2.33E-99  | 0.95772386 | 0.697 | 0.473 | 3.29E-95  | Monocytes | Pkm          |
| 2.35E-99  | 0.58333088 | 0.235 | 0.061 | 3.33E-95  | Monocytes | Fam49a       |
| 4.85E-99  | 0.36800846 | 0.156 | 0.024 | 6.87E-95  | Monocytes | Cpne2        |
| 9.23E-99  | -1.5686063 | 0.052 | 0.267 | 1.31E-94  | Monocytes | H2-Ob        |
| 1.09E-98  | 0.75417207 | 0.573 | 0.313 | 1.54E-94  | Monocytes | Laptm4a      |
| 1.46E-98  | 0.33261356 | 0.122 | 0.012 | 2.07E-94  | Monocytes | Nfix         |
| 2.18E-98  | 0.46425747 | 0.249 | 0.068 | 3.09E-94  | Monocytes | Ehbp1l1      |
| 2.26E-98  | 0.3185919  | 0.134 | 0.016 | 3.20E-94  | Monocytes | Cln8         |
| 2.62E-98  | 0.67449594 | 0.999 | 0.998 | 3.71E-94  | Monocytes | Gm42418      |
| 2.67E-98  | 0.49202472 | 0.216 | 0.051 | 3.78E-94  | Monocytes | Gm6377       |
| 4.83E-98  | 0.30684804 | 0.107 | 0.007 | 6.84E-94  | Monocytes | Batf2        |
| 5.43E-98  | 0.87406285 | 0.495 | 0.233 | 7.69E-94  | Monocytes | Klf4         |
| 1.02E-97  | 0.41414754 | 0.12  | 0.011 | 1.45E-93  | Monocytes | 4930430E12F  |
| 1.41E-97  | 0.48163242 | 0.111 | 0.009 | 2.00E-93  | Monocytes | Zmynd15      |
| 1.47E-97  | 0.53298344 | 0.387 | 0.149 | 2.07E-93  | Monocytes | Rgs10        |

|          |            |       |       |          |           |          |
|----------|------------|-------|-------|----------|-----------|----------|
| 1.64E-97 | 0.39605763 | 0.217 | 0.051 | 2.33E-93 | Monocytes | Nuak2    |
| 4.03E-97 | 0.59603479 | 0.315 | 0.106 | 5.71E-93 | Monocytes | Gsn      |
| 4.50E-97 | 0.36144498 | 0.291 | 0.088 | 6.37E-93 | Monocytes | Plekho1  |
| 4.60E-97 | 0.39285837 | 0.148 | 0.022 | 6.51E-93 | Monocytes | Tmem86a  |
| 4.87E-97 | 0.51420548 | 0.269 | 0.079 | 6.89E-93 | Monocytes | Rnf19b   |
| 5.31E-97 | 0.7489989  | 0.644 | 0.4   | 7.51E-93 | Monocytes | Pomp     |
| 9.16E-97 | -0.4650489 | 0.929 | 0.941 | 1.30E-92 | Monocytes | Rpl23    |
| 1.25E-96 | 0.68585987 | 0.266 | 0.08  | 1.77E-92 | Monocytes | Bag3     |
| 1.39E-96 | 1.0915346  | 0.289 | 0.096 | 1.97E-92 | Monocytes | Fabp5    |
| 1.56E-96 | 0.25720417 | 0.131 | 0.015 | 2.21E-92 | Monocytes | Ubt1     |
| 8.59E-96 | 0.41423987 | 0.248 | 0.069 | 1.22E-91 | Monocytes | Rnpep    |
| 2.46E-95 | 0.32333365 | 0.145 | 0.021 | 3.48E-91 | Monocytes | Bst1     |
| 2.55E-95 | 0.39946826 | 0.119 | 0.012 | 3.61E-91 | Monocytes | Sowahc   |
| 2.69E-95 | 0.76505334 | 0.181 | 0.037 | 3.80E-91 | Monocytes | Ceacam1  |
| 2.77E-95 | -0.4775482 | 0.905 | 0.908 | 3.92E-91 | Monocytes | Rpl34    |
| 4.47E-95 | -0.4767696 | 0.89  | 0.944 | 6.33E-91 | Monocytes | Rpl37    |
| 1.11E-94 | 0.79330364 | 0.13  | 0.016 | 1.57E-90 | Monocytes | Hpgd     |
| 1.72E-94 | 0.41951664 | 0.158 | 0.027 | 2.44E-90 | Monocytes | Slc8b1   |
| 2.32E-94 | 0.7815334  | 0.515 | 0.257 | 3.28E-90 | Monocytes | Syng2    |
| 1.19E-93 | 0.412977   | 0.268 | 0.081 | 1.68E-89 | Monocytes | Sap30    |
| 3.80E-93 | 0.27887933 | 0.115 | 0.011 | 5.38E-89 | Monocytes | Aph1c    |
| 5.48E-93 | 0.67299615 | 0.424 | 0.185 | 7.76E-89 | Monocytes | Irf7     |
| 6.25E-93 | -0.6982658 | 0.75  | 0.804 | 8.85E-89 | Monocytes | Rpl36a   |
| 1.31E-92 | 0.55269827 | 0.372 | 0.144 | 1.86E-88 | Monocytes | Ehd4     |
| 2.02E-92 | 0.55502    | 0.24  | 0.068 | 2.86E-88 | Monocytes | Dram2    |
| 5.82E-92 | -1.0525593 | 0.161 | 0.388 | 8.24E-88 | Monocytes | Gimap3   |
| 5.98E-92 | 0.53788643 | 0.412 | 0.17  | 8.46E-88 | Monocytes | Fam174a  |
| 1.11E-91 | 0.60339809 | 0.124 | 0.015 | 1.58E-87 | Monocytes | F13a1    |
| 1.23E-91 | 0.35063053 | 0.149 | 0.024 | 1.73E-87 | Monocytes | Tlr7     |
| 3.19E-91 | 0.26806896 | 0.126 | 0.015 | 4.52E-87 | Monocytes | Gab2     |
| 3.79E-91 | 0.70901647 | 0.32  | 0.117 | 5.36E-87 | Monocytes | Lgals3bp |
| 3.95E-91 | 0.47655831 | 0.484 | 0.223 | 5.59E-87 | Monocytes | Cd44     |
| 6.88E-91 | 0.45156224 | 0.274 | 0.085 | 9.74E-87 | Monocytes | Dstn     |
| 7.36E-91 | 0.34027015 | 0.105 | 0.008 | 1.04E-86 | Monocytes | Tbc1d8   |
| 7.45E-91 | -0.4763091 | 0.946 | 0.939 | 1.05E-86 | Monocytes | Rps8     |
| 2.86E-90 | 0.30352647 | 0.122 | 0.014 | 4.04E-86 | Monocytes | Cyp4f16  |
| 4.04E-90 | 0.52089926 | 0.304 | 0.105 | 5.72E-86 | Monocytes | Metrnl   |
| 4.28E-90 | -1.0749334 | 0.515 | 0.658 | 6.06E-86 | Monocytes | Stk17b   |
| 7.16E-90 | 0.27534862 | 0.193 | 0.043 | 1.01E-85 | Monocytes | Hacd4    |
| 7.23E-90 | 0.44787294 | 0.297 | 0.099 | 1.02E-85 | Monocytes | Myd88    |
| 9.69E-90 | 0.29336001 | 0.131 | 0.018 | 1.37E-85 | Monocytes | Tarm1    |
| 2.16E-89 | 0.67372168 | 0.481 | 0.232 | 3.06E-85 | Monocytes | Man2b1   |
| 2.45E-89 | 0.69304894 | 0.402 | 0.175 | 3.46E-85 | Monocytes | Nfil3    |
| 2.52E-89 | 0.80801293 | 0.303 | 0.108 | 3.57E-85 | Monocytes | Sgk1     |
| 3.11E-89 | 0.72984339 | 0.543 | 0.292 | 4.40E-85 | Monocytes | Dbi      |
| 5.06E-89 | 0.28655756 | 0.135 | 0.019 | 7.17E-85 | Monocytes | Renbp    |
| 5.43E-89 | 0.31276962 | 0.113 | 0.011 | 7.69E-85 | Monocytes | Fgd4     |
| 8.70E-89 | 0.47360604 | 0.356 | 0.138 | 1.23E-84 | Monocytes | Dynlt1b  |

|          |            |       |       |          |           |          |
|----------|------------|-------|-------|----------|-----------|----------|
| 1.42E-88 | 0.35002884 | 0.171 | 0.035 | 2.00E-84 | Monocytes | Dnajb14  |
| 1.44E-88 | 0.50845611 | 0.356 | 0.137 | 2.03E-84 | Monocytes | Fkbp2    |
| 1.83E-88 | 0.39615993 | 0.125 | 0.016 | 2.60E-84 | Monocytes | Lacc1    |
| 3.25E-88 | 0.28376749 | 0.165 | 0.031 | 4.60E-84 | Monocytes | Slc2a6   |
| 3.52E-88 | 0.49898153 | 0.29  | 0.096 | 4.98E-84 | Monocytes | Scpep1   |
| 3.65E-88 | 0.68714361 | 0.133 | 0.02  | 5.16E-84 | Monocytes | Ccl12    |
| 5.07E-88 | 0.44175173 | 0.197 | 0.047 | 7.17E-84 | Monocytes | Rbpms    |
| 7.98E-88 | -0.6843421 | 0.749 | 0.842 | 1.13E-83 | Monocytes | Ddx5     |
| 1.68E-87 | 0.52310727 | 0.828 | 0.764 | 2.38E-83 | Monocytes | Arpc1b   |
| 1.88E-87 | 0.60903466 | 0.537 | 0.267 | 2.66E-83 | Monocytes | Lyn      |
| 2.09E-87 | 0.66760517 | 0.762 | 0.572 | 2.96E-83 | Monocytes | Dusp1    |
| 2.21E-87 | 0.51022018 | 0.241 | 0.07  | 3.13E-83 | Monocytes | Cd40     |
| 3.55E-87 | 0.28535519 | 0.138 | 0.021 | 5.03E-83 | Monocytes | St3gal5  |
| 4.31E-87 | 0.70056414 | 0.591 | 0.329 | 6.10E-83 | Monocytes | Slfn2    |
| 6.26E-87 | -0.5006498 | 0.914 | 0.904 | 8.86E-83 | Monocytes | Rps5     |
| 6.78E-87 | 0.69004059 | 0.611 | 0.373 | 9.59E-83 | Monocytes | Erp29    |
| 8.14E-87 | 0.480339   | 0.27  | 0.087 | 1.15E-82 | Monocytes | Gsto1    |
| 1.06E-86 | 0.53876725 | 0.224 | 0.063 | 1.50E-82 | Monocytes | Gbp3     |
| 1.39E-86 | 0.7485356  | 0.53  | 0.275 | 1.96E-82 | Monocytes | Zfand5   |
| 1.70E-86 | -1.1117787 | 0.087 | 0.293 | 2.41E-82 | Monocytes | P2ry10   |
| 2.02E-86 | 0.31302666 | 0.13  | 0.019 | 2.86E-82 | Monocytes | Parp12   |
| 2.26E-86 | 0.53089333 | 0.424 | 0.185 | 3.19E-82 | Monocytes | Cnih4    |
| 4.90E-86 | 0.31824487 | 0.102 | 0.009 | 6.93E-82 | Monocytes | Fam129b  |
| 5.61E-86 | 0.33062279 | 0.126 | 0.017 | 7.94E-82 | Monocytes | Rnase4   |
| 5.79E-86 | 0.31049135 | 0.105 | 0.01  | 8.19E-82 | Monocytes | Eng      |
| 6.12E-86 | -1.7088472 | 0.089 | 0.29  | 8.67E-82 | Monocytes | H2-DMb2  |
| 6.78E-86 | -0.9637576 | 0.157 | 0.371 | 9.60E-82 | Monocytes | Gimap1   |
| 1.63E-85 | 0.97486693 | 0.116 | 0.014 | 2.31E-81 | Monocytes | Ccl7     |
| 1.75E-85 | 0.4191132  | 0.282 | 0.094 | 2.48E-81 | Monocytes | Rsu1     |
| 1.83E-85 | 0.3545618  | 0.155 | 0.029 | 2.59E-81 | Monocytes | Pilrb2   |
| 1.88E-85 | 0.6648375  | 0.643 | 0.396 | 2.67E-81 | Monocytes | Atp6v0b  |
| 2.71E-85 | 0.46802527 | 0.426 | 0.182 | 3.84E-81 | Monocytes | AB124611 |
| 3.38E-85 | 0.67435831 | 0.26  | 0.084 | 4.78E-81 | Monocytes | Cd274    |
| 4.56E-85 | 0.45707531 | 0.329 | 0.124 | 6.46E-81 | Monocytes | Tmed3    |
| 5.62E-85 | 0.30099215 | 0.104 | 0.01  | 7.95E-81 | Monocytes | Dock4    |
| 1.17E-84 | -0.6994176 | 0.71  | 0.831 | 1.66E-80 | Monocytes | Rac2     |
| 1.68E-84 | 0.49959122 | 0.267 | 0.088 | 2.37E-80 | Monocytes | Abhd12   |
| 2.11E-84 | 0.56953413 | 0.352 | 0.142 | 2.99E-80 | Monocytes | Itm2c    |
| 3.81E-84 | -1.1981386 | 0.006 | 0.176 | 5.39E-80 | Monocytes | Fcer2a   |
| 4.41E-84 | 0.47693607 | 0.171 | 0.037 | 6.24E-80 | Monocytes | Frmd4b   |
| 6.02E-84 | 0.42236008 | 0.249 | 0.077 | 8.52E-80 | Monocytes | Ube2l6   |
| 6.14E-84 | 0.47801007 | 0.143 | 0.025 | 8.70E-80 | Monocytes | Gbp5     |
| 1.68E-83 | -1.1323499 | 0.016 | 0.192 | 2.38E-79 | Monocytes | Bank1    |
| 1.74E-83 | 0.36060099 | 0.159 | 0.032 | 2.47E-79 | Monocytes | Tmbim1   |
| 2.23E-83 | 0.71817479 | 0.53  | 0.292 | 3.15E-79 | Monocytes | Aprt     |
| 9.67E-83 | 0.49974146 | 0.245 | 0.076 | 1.37E-78 | Monocytes | Ptprj    |
| 9.72E-83 | 0.50782937 | 0.889 | 0.801 | 1.38E-78 | Monocytes | Ly6e     |
| 1.82E-82 | -0.4843463 | 0.913 | 0.885 | 2.57E-78 | Monocytes | Rpl32    |

|          |            |       |       |          |           |          |
|----------|------------|-------|-------|----------|-----------|----------|
| 2.52E-82 | 0.37460146 | 0.159 | 0.032 | 3.56E-78 | Monocytes | Adam9    |
| 6.72E-82 | 0.40030039 | 0.22  | 0.063 | 9.51E-78 | Monocytes | Ppt2     |
| 1.15E-81 | 0.32927053 | 0.131 | 0.02  | 1.62E-77 | Monocytes | Il13ra1  |
| 1.25E-81 | 0.28708597 | 0.108 | 0.012 | 1.77E-77 | Monocytes | Dna2     |
| 1.48E-81 | 0.71853594 | 0.144 | 0.027 | 2.09E-77 | Monocytes | Cd36     |
| 1.84E-81 | 0.42453124 | 0.101 | 0.01  | 2.60E-77 | Monocytes | Upp1     |
| 2.11E-81 | 0.60358821 | 0.446 | 0.211 | 2.99E-77 | Monocytes | Ak2      |
| 2.17E-81 | -0.5255466 | 0.834 | 0.849 | 3.07E-77 | Monocytes | Rpl3     |
| 2.95E-81 | 0.315992   | 0.122 | 0.017 | 4.17E-77 | Monocytes | Cmklr1   |
| 6.64E-81 | 0.38734159 | 0.126 | 0.019 | 9.40E-77 | Monocytes | Rap1gap2 |
| 7.98E-81 | 0.71599269 | 0.724 | 0.558 | 1.13E-76 | Monocytes | Prdx1    |
| 2.34E-80 | 0.46088525 | 0.333 | 0.131 | 3.32E-76 | Monocytes | Tmem219  |
| 2.58E-80 | 0.46598209 | 0.223 | 0.064 | 3.65E-76 | Monocytes | Fgd2     |
| 1.59E-79 | 0.31882298 | 0.108 | 0.013 | 2.26E-75 | Monocytes | Mitf     |
| 2.15E-79 | 0.30178816 | 0.103 | 0.011 | 3.05E-75 | Monocytes | Amz1     |
| 2.27E-79 | -2.0043148 | 0.11  | 0.298 | 3.21E-75 | Monocytes | Cd79b    |
| 2.75E-79 | 0.28874045 | 0.106 | 0.012 | 3.89E-75 | Monocytes | Rab3il1  |
| 2.75E-79 | 0.44222339 | 0.359 | 0.146 | 3.89E-75 | Monocytes | Ube2f    |
| 3.25E-79 | 0.31319148 | 0.194 | 0.05  | 4.60E-75 | Monocytes | Elmo2    |
| 3.34E-79 | 0.61657793 | 0.141 | 0.026 | 4.73E-75 | Monocytes | Tnip3    |
| 3.47E-79 | -0.42286   | 0.942 | 0.955 | 4.92E-75 | Monocytes | Tpt1     |
| 3.61E-79 | 0.44526895 | 0.25  | 0.081 | 5.11E-75 | Monocytes | Ggh      |
| 9.03E-79 | 0.32761445 | 0.132 | 0.022 | 1.28E-74 | Monocytes | Clec4n   |
| 1.53E-78 | 0.28889498 | 0.311 | 0.117 | 2.16E-74 | Monocytes | Gsr      |
| 2.57E-78 | -0.4798608 | 0.908 | 0.896 | 3.63E-74 | Monocytes | Rps26    |
| 3.69E-78 | 0.3277073  | 0.195 | 0.052 | 5.22E-74 | Monocytes | Ntpcr    |
| 1.26E-77 | 0.50721608 | 0.307 | 0.117 | 1.78E-73 | Monocytes | Rnf213   |
| 1.90E-77 | 0.35365347 | 0.253 | 0.083 | 2.69E-73 | Monocytes | Hmgcl    |
| 3.60E-77 | -0.536747  | 0.929 | 0.973 | 5.10E-73 | Monocytes | H3f3b    |
| 4.69E-77 | 0.39739853 | 0.255 | 0.085 | 6.63E-73 | Monocytes | Soat1    |
| 4.79E-77 | -0.893871  | 0.184 | 0.395 | 6.79E-73 | Monocytes | Gimap4   |
| 7.89E-77 | -0.4096248 | 0.931 | 0.918 | 1.12E-72 | Monocytes | Rpl19    |
| 1.30E-76 | 0.29007043 | 0.137 | 0.025 | 1.85E-72 | Monocytes | Slc12a9  |
| 1.40E-76 | 0.44436833 | 0.409 | 0.178 | 1.98E-72 | Monocytes | Nrros    |
| 1.45E-76 | 0.30852427 | 0.153 | 0.032 | 2.05E-72 | Monocytes | Gpr137b  |
| 3.78E-76 | -0.7113383 | 0.733 | 0.786 | 5.36E-72 | Monocytes | Eef2     |
| 4.23E-76 | -1.0217194 | 0.006 | 0.162 | 5.98E-72 | Monocytes | Blk      |
| 4.97E-76 | -0.7522656 | 0.557 | 0.664 | 7.04E-72 | Monocytes | Cnbp     |
| 7.63E-76 | -0.7961553 | 0.81  | 0.849 | 1.08E-71 | Monocytes | Rps28    |
| 1.52E-75 | 0.4258319  | 0.318 | 0.125 | 2.16E-71 | Monocytes | Nadk     |
| 3.18E-75 | 0.25479232 | 0.115 | 0.017 | 4.50E-71 | Monocytes | Pla2g15  |
| 4.23E-75 | 0.4644659  | 0.312 | 0.121 | 5.99E-71 | Monocytes | Tm6sf1   |
| 5.71E-75 | 0.80038081 | 0.525 | 0.306 | 8.08E-71 | Monocytes | Capza2   |
| 1.13E-74 | 0.30566532 | 0.162 | 0.037 | 1.60E-70 | Monocytes | Rab31    |
| 1.20E-74 | 0.89042774 | 0.199 | 0.059 | 1.70E-70 | Monocytes | AA467197 |
| 1.61E-74 | 0.38124663 | 0.287 | 0.106 | 2.28E-70 | Monocytes | Map7d1   |
| 3.17E-74 | 0.62065853 | 0.468 | 0.241 | 4.48E-70 | Monocytes | Coro1b   |
| 3.48E-74 | 0.40386161 | 0.299 | 0.114 | 4.92E-70 | Monocytes | Slc6a6   |

|          |            |       |       |          |           |           |
|----------|------------|-------|-------|----------|-----------|-----------|
| 6.71E-74 | 0.31042865 | 0.186 | 0.049 | 9.49E-70 | Monocytes | G6pdx     |
| 7.04E-74 | 0.44623572 | 0.19  | 0.052 | 9.97E-70 | Monocytes | Furin     |
| 7.92E-74 | 0.38924334 | 0.335 | 0.136 | 1.12E-69 | Monocytes | Myo1f     |
| 1.14E-73 | 0.59672299 | 0.291 | 0.111 | 1.62E-69 | Monocytes | Ass1      |
| 1.86E-73 | 0.26061136 | 0.104 | 0.013 | 2.63E-69 | Monocytes | Anxa3     |
| 1.94E-73 | 0.61823647 | 0.741 | 0.545 | 2.75E-69 | Monocytes | Nfkbia    |
| 1.98E-73 | 0.68541917 | 0.713 | 0.522 | 2.80E-69 | Monocytes | Psme2     |
| 2.34E-73 | 0.63291604 | 0.524 | 0.286 | 3.31E-69 | Monocytes | Stat1     |
| 7.01E-73 | 0.39220282 | 0.275 | 0.101 | 9.93E-69 | Monocytes | Xaf1      |
| 8.43E-73 | 0.64278877 | 0.571 | 0.335 | 1.19E-68 | Monocytes | Irgb2     |
| 8.52E-73 | 0.54090882 | 0.441 | 0.214 | 1.21E-68 | Monocytes | Tmem256   |
| 1.27E-72 | 0.3174605  | 0.122 | 0.021 | 1.80E-68 | Monocytes | Ii15ra    |
| 1.49E-72 | 0.61315801 | 0.557 | 0.324 | 2.10E-68 | Monocytes | Tmem14c   |
| 1.55E-72 | 0.52157807 | 0.558 | 0.309 | 2.20E-68 | Monocytes | Zyx       |
| 1.72E-72 | 0.35315071 | 0.358 | 0.147 | 2.44E-68 | Monocytes | Dok3      |
| 1.78E-72 | 0.26996571 | 0.122 | 0.021 | 2.52E-68 | Monocytes | Tmem104   |
| 2.08E-72 | 0.33432525 | 0.157 | 0.036 | 2.94E-68 | Monocytes | Daglb     |
| 3.23E-72 | 0.62925981 | 0.484 | 0.257 | 4.58E-68 | Monocytes | Tkt       |
| 9.75E-72 | -0.9756652 | 0.191 | 0.387 | 1.38E-67 | Monocytes | Ikzf3     |
| 1.90E-71 | 0.70324961 | 0.343 | 0.152 | 2.68E-67 | Monocytes | Gns       |
| 4.64E-71 | 0.33135537 | 0.117 | 0.019 | 6.56E-67 | Monocytes | Dab2      |
| 6.82E-71 | 0.78251299 | 0.355 | 0.164 | 9.66E-67 | Monocytes | Ifi47     |
| 7.55E-71 | 0.37850883 | 0.166 | 0.042 | 1.07E-66 | Monocytes | Lap3      |
| 9.72E-71 | 0.53618568 | 0.471 | 0.24  | 1.38E-66 | Monocytes | Ncf4      |
| 9.82E-71 | -0.9603557 | 0.4   | 0.545 | 1.39E-66 | Monocytes | Fam107b   |
| 1.03E-70 | 0.38529424 | 0.31  | 0.122 | 1.45E-66 | Monocytes | Stx7      |
| 1.34E-70 | 0.65449192 | 0.44  | 0.222 | 1.89E-66 | Monocytes | Fgl2      |
| 1.59E-70 | 0.60505088 | 0.784 | 0.662 | 2.25E-66 | Monocytes | Psmb8     |
| 1.81E-70 | 0.3816639  | 0.261 | 0.093 | 2.57E-66 | Monocytes | Mpp1      |
| 1.86E-70 | -0.5225398 | 0.83  | 0.856 | 2.64E-66 | Monocytes | Rpl10a    |
| 2.25E-70 | 0.28665004 | 0.227 | 0.074 | 3.18E-66 | Monocytes | Eif4e3    |
| 2.28E-70 | -1.2732138 | 0.065 | 0.24  | 3.23E-66 | Monocytes | Cd24a     |
| 2.29E-70 | 0.38364663 | 0.15  | 0.034 | 3.23E-66 | Monocytes | Pfkfb3    |
| 2.57E-70 | 0.31108591 | 0.137 | 0.028 | 3.63E-66 | Monocytes | Cyp4v3    |
| 2.70E-70 | -1.0427255 | 0.011 | 0.162 | 3.82E-66 | Monocytes | Mzb1      |
| 3.68E-70 | 0.39936316 | 0.244 | 0.083 | 5.21E-66 | Monocytes | Prcp      |
| 4.41E-70 | 0.25375439 | 0.116 | 0.019 | 6.24E-66 | Monocytes | Vwa5a     |
| 1.02E-69 | 0.26995969 | 0.18  | 0.049 | 1.45E-65 | Monocytes | Ctnnbip1  |
| 1.29E-69 | 0.50394256 | 0.115 | 0.019 | 1.82E-65 | Monocytes | Stab1     |
| 1.38E-69 | 0.33858491 | 0.275 | 0.102 | 1.95E-65 | Monocytes | Mapkapk2  |
| 1.52E-69 | 0.28935151 | 0.121 | 0.021 | 2.15E-65 | Monocytes | Ly96      |
| 5.19E-69 | 0.31068204 | 0.133 | 0.027 | 7.34E-65 | Monocytes | Slc29a3   |
| 7.78E-69 | 0.51764885 | 0.335 | 0.143 | 1.10E-64 | Monocytes | Mef2a     |
| 1.11E-68 | 0.43945741 | 0.104 | 0.015 | 1.56E-64 | Monocytes | Dst       |
| 4.29E-68 | 0.33248448 | 0.316 | 0.129 | 6.07E-64 | Monocytes | Rtp4      |
| 5.81E-68 | 0.4281892  | 0.377 | 0.17  | 8.23E-64 | Monocytes | Tnfaip8l2 |
| 8.86E-68 | -0.6130668 | 0.845 | 0.875 | 1.25E-63 | Monocytes | Rpl35a    |
| 9.15E-68 | 0.2974973  | 0.109 | 0.017 | 1.29E-63 | Monocytes | Tnfsf13b  |

|          |            |       |       |          |           |          |
|----------|------------|-------|-------|----------|-----------|----------|
| 1.16E-67 | 0.48212026 | 0.761 | 0.565 | 1.64E-63 | Monocytes | Ifi27l2a |
| 1.17E-67 | 0.46119062 | 0.651 | 0.385 | 1.66E-63 | Monocytes | Anxa2    |
| 1.97E-67 | 0.46408183 | 0.23  | 0.08  | 2.78E-63 | Monocytes | Cx3cr1   |
| 3.70E-67 | 0.28077483 | 0.154 | 0.037 | 5.23E-63 | Monocytes | Vav3     |
| 4.09E-67 | -0.5505368 | 0.816 | 0.836 | 5.80E-63 | Monocytes | Rps18    |
| 4.31E-67 | 0.42617745 | 0.226 | 0.076 | 6.10E-63 | Monocytes | Synj1    |
| 4.45E-67 | 0.31020362 | 0.133 | 0.028 | 6.30E-63 | Monocytes | Plod1    |
| 4.93E-67 | -0.4201767 | 0.936 | 0.901 | 6.98E-63 | Monocytes | Rps4x    |
| 1.47E-66 | 0.25028516 | 0.102 | 0.015 | 2.08E-62 | Monocytes | Rras     |
| 1.69E-66 | -0.416756  | 0.903 | 0.928 | 2.40E-62 | Monocytes | Rpl18    |
| 1.94E-66 | 0.54866447 | 0.21  | 0.069 | 2.74E-62 | Monocytes | Tgtp2    |
| 2.01E-66 | -0.4957966 | 0.943 | 0.924 | 2.84E-62 | Monocytes | Eef1a1   |
| 2.49E-66 | 0.3352846  | 0.298 | 0.117 | 3.52E-62 | Monocytes | Rnf130   |
| 2.96E-66 | -0.9045154 | 0.007 | 0.147 | 4.19E-62 | Monocytes | Scd1     |
| 5.74E-66 | 0.43213138 | 0.304 | 0.126 | 8.12E-62 | Monocytes | Bri3bp   |
| 5.94E-66 | -1.0244601 | 0.19  | 0.373 | 8.41E-62 | Monocytes | Lck      |
| 1.04E-65 | 0.39269682 | 0.187 | 0.056 | 1.48E-61 | Monocytes | Stat2    |
| 1.06E-65 | 0.40171892 | 0.34  | 0.147 | 1.51E-61 | Monocytes | Mrpl14   |
| 1.72E-65 | 0.29838068 | 0.118 | 0.022 | 2.44E-61 | Monocytes | Idh1     |
| 1.82E-65 | -0.8931699 | 0.032 | 0.184 | 2.57E-61 | Monocytes | Bach2    |
| 3.39E-65 | 0.54400641 | 0.323 | 0.14  | 4.80E-61 | Monocytes | Sh3bgrl  |
| 5.05E-65 | 0.5370761  | 0.569 | 0.338 | 7.15E-61 | Monocytes | Ptpn1    |
| 7.74E-65 | 0.27368259 | 0.117 | 0.021 | 1.10E-60 | Monocytes | Zfp710   |
| 8.33E-65 | 0.35315271 | 0.457 | 0.242 | 1.18E-60 | Monocytes | Isg15    |
| 9.61E-65 | -0.6847786 | 0.609 | 0.695 | 1.36E-60 | Monocytes | Rpl22l1  |
| 1.66E-64 | -0.9320404 | 0.014 | 0.156 | 2.34E-60 | Monocytes | Fcrla    |
| 2.14E-64 | 0.46201246 | 0.396 | 0.188 | 3.04E-60 | Monocytes | Hmox2    |
| 2.80E-64 | 0.34617168 | 0.233 | 0.08  | 3.96E-60 | Monocytes | P2rx4    |
| 3.54E-64 | -0.381786  | 0.917 | 0.91  | 5.01E-60 | Monocytes | Rpl6     |
| 3.83E-64 | 0.59057802 | 0.215 | 0.074 | 5.42E-60 | Monocytes | Tnf      |
| 4.30E-64 | -0.4807172 | 0.836 | 0.867 | 6.09E-60 | Monocytes | Rps12    |
| 5.75E-64 | 0.37449893 | 0.117 | 0.022 | 8.14E-60 | Monocytes | Gk       |
| 6.11E-64 | 0.25793548 | 0.189 | 0.056 | 8.64E-60 | Monocytes | Rogdi    |
| 6.90E-64 | 0.30278774 | 0.206 | 0.066 | 9.76E-60 | Monocytes | Nfic     |
| 2.90E-63 | 0.35080498 | 0.207 | 0.068 | 4.11E-59 | Monocytes | Ddi2     |
| 3.34E-63 | 0.38609279 | 0.244 | 0.091 | 4.72E-59 | Monocytes | Bak1     |
| 4.49E-63 | 0.44486477 | 0.107 | 0.019 | 6.35E-59 | Monocytes | Mrc1     |
| 1.03E-62 | 0.34577455 | 0.22  | 0.076 | 1.45E-58 | Monocytes | Echs1    |
| 1.95E-62 | 0.60824626 | 0.527 | 0.309 | 2.76E-58 | Monocytes | Ptms     |
| 2.29E-62 | -0.9904946 | 0.291 | 0.46  | 3.24E-58 | Monocytes | Cd69     |
| 2.35E-62 | 0.55264474 | 0.855 | 0.842 | 3.33E-58 | Monocytes | Calm1    |
| 2.54E-62 | 0.44387933 | 0.264 | 0.103 | 3.59E-58 | Monocytes | Piezo1   |
| 3.60E-62 | 0.52866082 | 0.208 | 0.072 | 5.10E-58 | Monocytes | Fkbp5    |
| 4.32E-62 | 0.33907378 | 0.378 | 0.177 | 6.12E-58 | Monocytes | Nfkbiz   |
| 7.24E-62 | 0.29262179 | 0.11  | 0.02  | 1.03E-57 | Monocytes | Asph     |
| 8.15E-62 | 0.30484854 | 0.426 | 0.217 | 1.15E-57 | Monocytes | Plaur    |
| 8.25E-62 | -0.4530696 | 0.818 | 0.843 | 1.17E-57 | Monocytes | Rpl7     |
| 9.04E-62 | 0.34301029 | 0.23  | 0.083 | 1.28E-57 | Monocytes | Pmvk     |

|          |            |       |       |          |           |         |
|----------|------------|-------|-------|----------|-----------|---------|
| 1.25E-61 | -0.4010819 | 0.843 | 0.867 | 1.77E-57 | Monocytes | Rpl27   |
| 1.31E-61 | 0.32563308 | 0.216 | 0.074 | 1.86E-57 | Monocytes | Ap2a2   |
| 1.99E-61 | 0.25146716 | 0.301 | 0.121 | 2.81E-57 | Monocytes | Ifngr2  |
| 2.85E-61 | 0.29838853 | 0.103 | 0.017 | 4.03E-57 | Monocytes | Naip5   |
| 4.34E-61 | 0.25577287 | 0.144 | 0.036 | 6.15E-57 | Monocytes | Sh3bp2  |
| 4.81E-61 | 0.32653511 | 0.301 | 0.127 | 6.81E-57 | Monocytes | Lrpap1  |
| 5.49E-61 | 0.28446939 | 0.309 | 0.128 | 7.77E-57 | Monocytes | Themis2 |
| 7.45E-61 | 0.70135425 | 0.518 | 0.305 | 1.06E-56 | Monocytes | Bcl2a1b |
| 1.32E-60 | 0.67601265 | 0.45  | 0.246 | 1.87E-56 | Monocytes | Pgam1   |
| 1.46E-60 | 0.4038681  | 0.275 | 0.112 | 2.07E-56 | Monocytes | Igtp    |
| 1.92E-60 | 0.48503361 | 0.319 | 0.142 | 2.72E-56 | Monocytes | Icam1   |
| 2.37E-60 | 0.27889174 | 0.287 | 0.116 | 3.35E-56 | Monocytes | Sbno2   |
| 2.54E-60 | 0.30993516 | 0.128 | 0.029 | 3.60E-56 | Monocytes | Luzp1   |
| 3.48E-60 | 0.66388566 | 0.425 | 0.227 | 4.92E-56 | Monocytes | Sod2    |
| 1.07E-59 | 0.29684981 | 0.195 | 0.062 | 1.52E-55 | Monocytes | Cd180   |
| 1.14E-59 | 0.5535603  | 0.757 | 0.624 | 1.61E-55 | Monocytes | Psme1   |
| 1.48E-59 | 0.29098793 | 0.122 | 0.026 | 2.10E-55 | Monocytes | Clcn7   |
| 1.79E-59 | 0.27770869 | 0.194 | 0.062 | 2.54E-55 | Monocytes | Pgap2   |
| 1.86E-59 | 0.25504904 | 0.281 | 0.115 | 2.64E-55 | Monocytes | Pgd     |
| 3.50E-59 | 0.51158595 | 0.425 | 0.222 | 4.96E-55 | Monocytes | Pitpna  |
| 3.55E-59 | 0.38910714 | 0.388 | 0.186 | 5.02E-55 | Monocytes | Scamp2  |
| 3.63E-59 | 0.3836276  | 0.155 | 0.044 | 5.14E-55 | Monocytes | Smpdl3b |
| 4.03E-59 | 0.40237262 | 0.232 | 0.086 | 5.70E-55 | Monocytes | Adam17  |
| 4.81E-59 | -1.1409178 | 0.332 | 0.497 | 6.81E-55 | Monocytes | Ms4a4b  |
| 1.09E-58 | 0.31441206 | 0.877 | 0.684 | 1.54E-54 | Monocytes | Fxyd5   |
| 1.15E-58 | 0.31495103 | 0.253 | 0.099 | 1.63E-54 | Monocytes | Atp6v1a |
| 1.25E-58 | 0.27897338 | 0.2   | 0.067 | 1.77E-54 | Monocytes | Ccdc86  |
| 1.36E-58 | 0.31559396 | 0.171 | 0.051 | 1.93E-54 | Monocytes | H1f0    |
| 1.62E-58 | 0.29204569 | 0.259 | 0.102 | 2.30E-54 | Monocytes | Blvra   |
| 1.75E-58 | 0.42676379 | 0.324 | 0.146 | 2.48E-54 | Monocytes | Sdf2l1  |
| 4.77E-58 | -0.5040425 | 0.705 | 0.793 | 6.75E-54 | Monocytes | Rbm39   |
| 1.38E-57 | 0.3946387  | 0.662 | 0.491 | 1.96E-53 | Monocytes | Taldo1  |
| 2.03E-57 | 0.25950681 | 0.138 | 0.035 | 2.87E-53 | Monocytes | Extl3   |
| 2.11E-57 | 0.26219128 | 0.268 | 0.108 | 2.98E-53 | Monocytes | Havcr2  |
| 5.42E-57 | -0.8512696 | 0.367 | 0.495 | 7.67E-53 | Monocytes | Elf1    |
| 5.46E-57 | 0.40525987 | 0.487 | 0.262 | 7.73E-53 | Monocytes | Ptpn6   |
| 6.54E-57 | 0.31540103 | 0.201 | 0.069 | 9.25E-53 | Monocytes | Mapk3   |
| 7.28E-57 | 0.49181145 | 0.459 | 0.249 | 1.03E-52 | Monocytes | Cyth4   |
| 8.67E-57 | 0.36067227 | 0.135 | 0.034 | 1.23E-52 | Monocytes | Gstm1   |
| 8.80E-57 | -0.9432384 | 0.231 | 0.407 | 1.25E-52 | Monocytes | Lat     |
| 1.12E-56 | -1.1024107 | 0.29  | 0.452 | 1.59E-52 | Monocytes | Cd3e    |
| 1.88E-56 | 0.2852792  | 0.184 | 0.06  | 2.66E-52 | Monocytes | Ufsp2   |
| 2.12E-56 | 0.3254413  | 0.169 | 0.052 | 3.01E-52 | Monocytes | Gsap    |
| 2.92E-56 | 0.35938166 | 0.389 | 0.193 | 4.13E-52 | Monocytes | Tm2d2   |
| 3.65E-56 | 0.41552767 | 0.291 | 0.126 | 5.16E-52 | Monocytes | Parp14  |
| 3.97E-56 | 0.29478096 | 0.112 | 0.023 | 5.62E-52 | Monocytes | P2ry14  |
| 4.81E-56 | -0.5224941 | 0.723 | 0.766 | 6.81E-52 | Monocytes | Rpl5    |
| 1.41E-55 | 0.2947652  | 0.125 | 0.03  | 1.99E-51 | Monocytes | Lpar6   |



|          |            |       |       |          |           |          |
|----------|------------|-------|-------|----------|-----------|----------|
| 2.54E-55 | -0.4814321 | 0.233 | 0.084 | 3.59E-51 | Monocytes | Trem1    |
| 4.83E-55 | 0.6104185  | 0.628 | 0.449 | 6.84E-51 | Monocytes | Psma7    |
| 4.87E-55 | -0.6985959 | 0.003 | 0.117 | 6.90E-51 | Monocytes | Cxcr5    |
| 5.07E-55 | 0.53912642 | 0.535 | 0.317 | 7.18E-51 | Monocytes | Flna     |
| 6.24E-55 | 0.45919134 | 0.362 | 0.179 | 8.84E-51 | Monocytes | Phf11b   |
| 8.17E-55 | 0.29364787 | 0.446 | 0.235 | 1.16E-50 | Monocytes | Card19   |
| 9.33E-55 | 0.36224082 | 0.312 | 0.14  | 1.32E-50 | Monocytes | Necap2   |
| 1.25E-54 | 0.26100258 | 0.253 | 0.102 | 1.77E-50 | Monocytes | Tor1a    |
| 1.27E-54 | -0.808493  | 0.144 | 0.303 | 1.80E-50 | Monocytes | Skap1    |
| 2.13E-54 | 0.27191805 | 0.125 | 0.031 | 3.02E-50 | Monocytes | Dse      |
| 2.17E-54 | 0.37434161 | 0.199 | 0.071 | 3.07E-50 | Monocytes | Tgfbr1   |
| 2.38E-54 | 0.2761147  | 0.574 | 0.32  | 3.36E-50 | Monocytes | S100a4   |
| 2.89E-54 | -0.4403972 | 0.797 | 0.837 | 4.09E-50 | Monocytes | Rpl14    |
| 3.48E-54 | 0.33847301 | 0.338 | 0.159 | 4.92E-50 | Monocytes | Stard3nl |
| 5.36E-54 | 0.32381537 | 0.167 | 0.053 | 7.59E-50 | Monocytes | Htra2    |
| 6.83E-54 | 0.32336496 | 0.145 | 0.041 | 9.67E-50 | Monocytes | Itgax    |
| 7.41E-54 | 0.44465631 | 0.459 | 0.25  | 1.05E-49 | Monocytes | Lamtor4  |
| 1.11E-53 | 0.27617899 | 0.243 | 0.097 | 1.57E-49 | Monocytes | Fbxo6    |
| 1.25E-53 | -0.4282601 | 0.796 | 0.831 | 1.77E-49 | Monocytes | Rpl22    |
| 1.91E-53 | 0.45811132 | 0.39  | 0.202 | 2.71E-49 | Monocytes | Rab5c    |
| 2.48E-53 | 0.3795113  | 0.19  | 0.066 | 3.50E-49 | Monocytes | Gm15987  |
| 2.53E-53 | 0.31273085 | 0.255 | 0.105 | 3.59E-49 | Monocytes | Comt     |
| 3.07E-53 | -0.7083177 | 0.011 | 0.129 | 4.34E-49 | Monocytes | Snn      |
| 3.50E-53 | 0.26787631 | 0.189 | 0.065 | 4.95E-49 | Monocytes | Sgk3     |
| 3.68E-53 | 0.29950288 | 0.209 | 0.078 | 5.21E-49 | Monocytes | Akt1     |
| 8.29E-53 | 0.30497176 | 0.223 | 0.085 | 1.17E-48 | Monocytes | Nenf     |
| 1.11E-52 | -0.554722  | 0.529 | 0.649 | 1.56E-48 | Monocytes | Il2rg    |
| 2.02E-52 | 0.5447787  | 0.503 | 0.299 | 2.87E-48 | Monocytes | Rps27l   |
| 3.18E-52 | 0.25287864 | 0.137 | 0.037 | 4.50E-48 | Monocytes | Acsl1    |
| 3.81E-52 | 0.51486704 | 0.416 | 0.225 | 5.39E-48 | Monocytes | Tap1     |
| 6.62E-52 | 0.40130115 | 0.434 | 0.233 | 9.38E-48 | Monocytes | Tmbim4   |
| 8.36E-52 | 0.33718721 | 0.374 | 0.186 | 1.18E-47 | Monocytes | Hcfc1r1  |
| 9.95E-52 | -0.706807  | 0.004 | 0.114 | 1.41E-47 | Monocytes | Pou2af1  |
| 1.09E-51 | -0.827061  | 0.079 | 0.219 | 1.55E-47 | Monocytes | Acap1    |
| 1.24E-51 | 0.41382388 | 0.441 | 0.243 | 1.76E-47 | Monocytes | Pycard   |
| 1.70E-51 | 0.38555395 | 0.6   | 0.369 | 2.41E-47 | Monocytes | Plek     |
| 2.35E-51 | -0.5723947 | 0.013 | 0.13  | 3.33E-47 | Monocytes | Cmah     |
| 2.48E-51 | -0.3302267 | 0.901 | 0.914 | 3.50E-47 | Monocytes | Rpl11    |
| 2.70E-51 | -0.7826904 | 0.429 | 0.533 | 3.83E-47 | Monocytes | Jak1     |
| 2.82E-51 | 0.29674696 | 0.355 | 0.173 | 4.00E-47 | Monocytes | Acaa1a   |
| 3.18E-51 | -0.3605654 | 0.858 | 0.886 | 4.50E-47 | Monocytes | Rplp2    |
| 3.23E-51 | 0.33001485 | 0.211 | 0.08  | 4.57E-47 | Monocytes | Camk1d   |
| 3.61E-51 | 0.45165661 | 0.463 | 0.26  | 5.12E-47 | Monocytes | Psma4    |
| 3.69E-51 | -0.9752114 | 0.149 | 0.302 | 5.22E-47 | Monocytes | Itk      |
| 3.96E-51 | -1.0927253 | 0.203 | 0.365 | 5.60E-47 | Monocytes | Ctsw     |
| 5.30E-51 | 0.64894589 | 0.94  | 0.924 | 7.51E-47 | Monocytes | Lars2    |
| 5.63E-51 | -0.948769  | 0.123 | 0.273 | 7.98E-47 | Monocytes | Gem      |
| 5.71E-51 | 0.28698534 | 0.127 | 0.034 | 8.08E-47 | Monocytes | Ifih1    |

|          |            |       |       |          |           |          |
|----------|------------|-------|-------|----------|-----------|----------|
| 6.73E-51 | 0.3348696  | 0.265 | 0.114 | 9.53E-47 | Monocytes | Trps1    |
| 8.61E-51 | -0.9128408 | 0.063 | 0.199 | 1.22E-46 | Monocytes | Ralgps2  |
| 1.56E-50 | 0.27725363 | 0.213 | 0.082 | 2.21E-46 | Monocytes | Dtx3l    |
| 1.86E-50 | 0.25530018 | 0.1   | 0.021 | 2.63E-46 | Monocytes | Dgat2    |
| 2.47E-50 | -0.8691594 | 0.412 | 0.518 | 3.49E-46 | Monocytes | Ezr      |
| 2.53E-50 | 0.26673198 | 0.988 | 0.981 | 3.58E-46 | Monocytes | Tmsb4x   |
| 3.17E-50 | 0.54997634 | 0.719 | 0.586 | 4.49E-46 | Monocytes | Eno1     |
| 5.96E-50 | 0.52331006 | 0.76  | 0.635 | 8.44E-46 | Monocytes | Aldoa    |
| 6.32E-50 | 0.30281337 | 0.195 | 0.071 | 8.95E-46 | Monocytes | Ppp1r9b  |
| 1.16E-49 | 0.34373067 | 0.147 | 0.045 | 1.64E-45 | Monocytes | Camkk2   |
| 1.22E-49 | 0.26376907 | 0.214 | 0.083 | 1.73E-45 | Monocytes | Cd2ap    |
| 1.23E-49 | 0.47009119 | 0.338 | 0.169 | 1.74E-45 | Monocytes | Hexb     |
| 1.28E-49 | -0.8423355 | 0.142 | 0.288 | 1.81E-45 | Monocytes | Rabgap1l |
| 1.28E-49 | 0.52918719 | 0.559 | 0.362 | 1.81E-45 | Monocytes | Smdt1    |
| 2.18E-49 | -0.6896881 | 0.03  | 0.152 | 3.09E-45 | Monocytes | Trp53i11 |
| 2.34E-49 | -0.558779  | 0.565 | 0.668 | 3.31E-45 | Monocytes | Limd2    |
| 2.68E-49 | -0.3278169 | 0.914 | 0.944 | 3.79E-45 | Monocytes | Rps9     |
| 3.53E-49 | -0.4658087 | 0.711 | 0.771 | 5.00E-45 | Monocytes | Rpl9     |
| 3.63E-49 | 0.52861051 | 0.713 | 0.607 | 5.14E-45 | Monocytes | Nme2     |
| 3.72E-49 | 0.38953789 | 0.113 | 0.028 | 5.26E-45 | Monocytes | Tgtp1    |
| 3.76E-49 | 0.27436674 | 0.222 | 0.089 | 5.33E-45 | Monocytes | Lipa     |
| 5.32E-49 | 0.3837359  | 0.251 | 0.108 | 7.53E-45 | Monocytes | Mfsd1    |
| 5.85E-49 | 0.31273392 | 0.326 | 0.156 | 8.28E-45 | Monocytes | Slc25a39 |
| 6.02E-49 | -0.9506532 | 0.293 | 0.45  | 8.52E-45 | Monocytes | Cd3d     |
| 8.69E-49 | 0.25324824 | 0.176 | 0.061 | 1.23E-44 | Monocytes | Pepd     |
| 1.07E-48 | 0.38303474 | 0.272 | 0.123 | 1.52E-44 | Monocytes | Agpat4   |
| 1.10E-48 | 0.45111638 | 0.608 | 0.408 | 1.56E-44 | Monocytes | Txn1     |
| 1.24E-48 | -0.7408119 | 0.003 | 0.106 | 1.76E-44 | Monocytes | Vpreb3   |
| 1.49E-48 | 0.51037946 | 0.458 | 0.265 | 2.11E-44 | Monocytes | Gng10    |
| 1.55E-48 | 0.44884212 | 0.45  | 0.255 | 2.19E-44 | Monocytes | Atp1a1   |
| 2.08E-48 | 0.32617307 | 0.298 | 0.138 | 2.94E-44 | Monocytes | Siva1    |
| 2.16E-48 | -1.0615596 | 0.289 | 0.412 | 3.06E-44 | Monocytes | Foxp1    |
| 2.33E-48 | 0.30892596 | 0.573 | 0.348 | 3.29E-44 | Monocytes | Ahnak    |
| 2.88E-48 | -0.2801704 | 0.969 | 0.984 | 4.08E-44 | Monocytes | Fau      |
| 2.99E-48 | -0.8096895 | 0.131 | 0.277 | 4.24E-44 | Monocytes | Prkca    |
| 4.47E-48 | -0.7422728 | 0.876 | 0.894 | 6.32E-44 | Monocytes | Rps29    |
| 6.16E-48 | 0.30482388 | 0.106 | 0.025 | 8.72E-44 | Monocytes | Spp1     |
| 6.37E-48 | -0.9084258 | 0.107 | 0.242 | 9.02E-44 | Monocytes | Foxo1    |
| 6.41E-48 | 0.6035341  | 0.795 | 0.693 | 9.08E-44 | Monocytes | Crip1    |
| 6.80E-48 | 0.33835303 | 0.341 | 0.169 | 9.63E-44 | Monocytes | Ssr3     |
| 8.62E-48 | -0.8972324 | 0.172 | 0.311 | 1.22E-43 | Monocytes | Hmgn1    |
| 1.36E-47 | 0.36185126 | 0.44  | 0.239 | 1.92E-43 | Monocytes | Tor1aip1 |
| 1.73E-47 | 0.32032838 | 0.342 | 0.169 | 2.44E-43 | Monocytes | Xbp1     |
| 1.81E-47 | 0.25712817 | 0.302 | 0.141 | 2.56E-43 | Monocytes | Trappc1  |
| 1.86E-47 | 0.28002194 | 0.365 | 0.188 | 2.64E-43 | Monocytes | Vsir     |
| 1.87E-47 | 0.48935943 | 0.323 | 0.159 | 2.64E-43 | Monocytes | Pou2f2   |
| 2.20E-47 | 0.43763574 | 0.52  | 0.314 | 3.11E-43 | Monocytes | Prdx2    |
| 2.61E-47 | -0.6906495 | 0.134 | 0.278 | 3.70E-43 | Monocytes | Tbc1d10c |

|          |            |       |       |          |           |           |
|----------|------------|-------|-------|----------|-----------|-----------|
| 5.17E-47 | -0.3899212 | 0.929 | 0.918 | 7.31E-43 | Monocytes | Rps2      |
| 6.77E-47 | -0.6553569 | 0.008 | 0.112 | 9.59E-43 | Monocytes | Cpm       |
| 6.87E-47 | 0.33192404 | 0.332 | 0.162 | 9.73E-43 | Monocytes | Uvrag     |
| 7.39E-47 | -0.5960604 | 0.005 | 0.106 | 1.05E-42 | Monocytes | Pax5      |
| 1.30E-46 | 0.76896945 | 0.282 | 0.137 | 1.84E-42 | Monocytes | Id3       |
| 1.75E-46 | 0.50161141 | 0.131 | 0.039 | 2.48E-42 | Monocytes | Cd63      |
| 1.84E-46 | 0.31384755 | 0.182 | 0.066 | 2.61E-42 | Monocytes | Qk        |
| 2.15E-46 | 0.45267784 | 0.518 | 0.313 | 3.05E-42 | Monocytes | Chmp2a    |
| 2.49E-46 | 0.5067791  | 0.529 | 0.333 | 3.52E-42 | Monocytes | Esd       |
| 3.35E-46 | -1.3268091 | 0.458 | 0.557 | 4.75E-42 | Monocytes | Dnajb1    |
| 5.89E-46 | 0.38055946 | 0.355 | 0.186 | 8.34E-42 | Monocytes | Slamf7    |
| 9.70E-46 | 0.33343753 | 0.21  | 0.085 | 1.37E-41 | Monocytes | Slc43a2   |
| 1.05E-45 | 0.37449101 | 0.399 | 0.22  | 1.48E-41 | Monocytes | Fermt3    |
| 2.13E-45 | -0.5067109 | 0.872 | 0.862 | 3.02E-41 | Monocytes | Rps19     |
| 2.31E-45 | -0.9674998 | 0.175 | 0.316 | 3.27E-41 | Monocytes | Sell      |
| 3.33E-45 | 0.32599737 | 0.273 | 0.126 | 4.72E-41 | Monocytes | Nmt1      |
| 4.53E-45 | 0.26262814 | 0.105 | 0.026 | 6.41E-41 | Monocytes | Atp7a     |
| 4.73E-45 | -0.5329651 | 0.663 | 0.708 | 6.69E-41 | Monocytes | Rpl4      |
| 5.38E-45 | 0.31766199 | 0.188 | 0.072 | 7.62E-41 | Monocytes | Cept1     |
| 5.49E-45 | -0.8693831 | 0.133 | 0.265 | 7.78E-41 | Monocytes | Ptp4a3    |
| 5.70E-45 | 0.48668154 | 0.179 | 0.068 | 8.07E-41 | Monocytes | Dusp16    |
| 9.25E-45 | 0.32932478 | 0.315 | 0.155 | 1.31E-40 | Monocytes | Atp6v1b2  |
| 1.10E-44 | 0.39564121 | 0.326 | 0.164 | 1.56E-40 | Monocytes | Degs1     |
| 1.15E-44 | 0.27637977 | 0.236 | 0.101 | 1.63E-40 | Monocytes | Phyh      |
| 1.19E-44 | 0.33575636 | 0.182 | 0.069 | 1.68E-40 | Monocytes | Parp9     |
| 1.27E-44 | 0.54597754 | 0.287 | 0.141 | 1.80E-40 | Monocytes | Serpina3g |
| 1.28E-44 | 0.26127767 | 0.243 | 0.106 | 1.81E-40 | Monocytes | Med8      |
| 1.87E-44 | 0.52317044 | 0.67  | 0.508 | 2.65E-40 | Monocytes | Tagln2    |
| 2.06E-44 | 0.71198433 | 0.292 | 0.149 | 2.92E-40 | Monocytes | Cd72      |
| 2.85E-44 | 0.26431152 | 0.251 | 0.113 | 4.03E-40 | Monocytes | Fam89b    |
| 2.95E-44 | 0.39429571 | 0.62  | 0.409 | 4.18E-40 | Monocytes | Tln1      |
| 3.23E-44 | 0.25772035 | 0.257 | 0.117 | 4.57E-40 | Monocytes | Fbxl5     |
| 3.46E-44 | 0.54763984 | 0.12  | 0.035 | 4.90E-40 | Monocytes | Hes1      |
| 4.08E-44 | 0.25258961 | 0.163 | 0.058 | 5.78E-40 | Monocytes | Abcd1     |
| 5.74E-44 | 0.25661102 | 0.166 | 0.059 | 8.13E-40 | Monocytes | Arf2      |
| 5.78E-44 | -0.699718  | 0.02  | 0.125 | 8.18E-40 | Monocytes | Siglecg   |
| 6.40E-44 | -0.8376176 | 0.12  | 0.253 | 9.06E-40 | Monocytes | Rnf125    |
| 7.30E-44 | -0.9787658 | 0.36  | 0.477 | 1.03E-39 | Monocytes | Hspd1     |
| 8.62E-44 | 0.63266528 | 0.372 | 0.212 | 1.22E-39 | Monocytes | Glul      |
| 9.77E-44 | -0.579702  | 0.016 | 0.119 | 1.38E-39 | Monocytes | St6gal1   |
| 1.28E-43 | 0.42162004 | 0.522 | 0.328 | 1.82E-39 | Monocytes | Chmp4b    |
| 1.50E-43 | 0.37941091 | 0.607 | 0.417 | 2.13E-39 | Monocytes | Mcl1      |
| 1.63E-43 | 0.41898566 | 0.364 | 0.195 | 2.31E-39 | Monocytes | Myo1g     |
| 1.76E-43 | 0.52214328 | 0.422 | 0.244 | 2.49E-39 | Monocytes | Bcl2a1d   |
| 2.95E-43 | -0.6954713 | 0.153 | 0.291 | 4.17E-39 | Monocytes | Gimap5    |
| 3.36E-43 | -0.4527566 | 0.71  | 0.747 | 4.76E-39 | Monocytes | Rps15     |
| 4.14E-43 | 0.3853385  | 0.39  | 0.211 | 5.85E-39 | Monocytes | Mbnl2     |
| 4.55E-43 | 0.34816867 | 0.328 | 0.166 | 6.44E-39 | Monocytes | Bnip2     |

|          |            |       |       |          |           |          |
|----------|------------|-------|-------|----------|-----------|----------|
| 6.11E-43 | -0.7697207 | 0.021 | 0.125 | 8.64E-39 | Monocytes | Lef1     |
| 8.21E-43 | 0.36699329 | 0.269 | 0.128 | 1.16E-38 | Monocytes | Ccr5     |
| 1.47E-42 | -0.6826414 | 0.095 | 0.221 | 2.08E-38 | Monocytes | Grap     |
| 1.97E-42 | 0.58910203 | 0.479 | 0.305 | 2.78E-38 | Monocytes | Sdcbp    |
| 2.09E-42 | -0.8501641 | 0.234 | 0.382 | 2.96E-38 | Monocytes | Sh2d2a   |
| 2.73E-42 | -0.4118555 | 0.75  | 0.791 | 3.86E-38 | Monocytes | Rps6     |
| 2.93E-42 | 0.49314007 | 0.676 | 0.52  | 4.15E-38 | Monocytes | Emp3     |
| 4.01E-42 | 0.30082227 | 0.102 | 0.026 | 5.68E-38 | Monocytes | Tnfsf9   |
| 9.40E-42 | -0.6939239 | 0.068 | 0.189 | 1.33E-37 | Monocytes | Atp2a3   |
| 1.17E-41 | 0.26103298 | 0.211 | 0.09  | 1.65E-37 | Monocytes | N4bp1    |
| 1.19E-41 | 0.27237403 | 0.168 | 0.063 | 1.69E-37 | Monocytes | Lrrk1    |
| 1.34E-41 | 0.2875042  | 0.147 | 0.051 | 1.90E-37 | Monocytes | Pot1b    |
| 1.72E-41 | -0.8292044 | 0.221 | 0.361 | 2.43E-37 | Monocytes | Thy1     |
| 1.81E-41 | 0.26343125 | 0.135 | 0.044 | 2.56E-37 | Monocytes | Nod1     |
| 1.83E-41 | 0.26708611 | 0.183 | 0.072 | 2.59E-37 | Monocytes | Usp8     |
| 1.93E-41 | 0.32202985 | 0.437 | 0.25  | 2.73E-37 | Monocytes | Glrx     |
| 2.62E-41 | 0.27946322 | 0.273 | 0.13  | 3.70E-37 | Monocytes | Sppl2a   |
| 3.62E-41 | 0.27700551 | 0.333 | 0.169 | 5.12E-37 | Monocytes | Plekho2  |
| 4.72E-41 | 0.36819147 | 0.387 | 0.214 | 6.68E-37 | Monocytes | Tbcb     |
| 1.05E-40 | 0.25806573 | 0.292 | 0.143 | 1.49E-36 | Monocytes | Ist1     |
| 1.45E-40 | 0.45108238 | 0.538 | 0.347 | 2.05E-36 | Monocytes | Ndufb8   |
| 1.61E-40 | 0.2574758  | 0.323 | 0.165 | 2.29E-36 | Monocytes | Sdhd     |
| 2.03E-40 | -0.6892196 | 0.373 | 0.472 | 2.87E-36 | Monocytes | Tubb4b   |
| 2.60E-40 | -0.26178   | 0.548 | 0.339 | 3.67E-36 | Monocytes | Ccl4     |
| 2.97E-40 | -0.6143238 | 0.065 | 0.182 | 4.20E-36 | Monocytes | S1pr4    |
| 2.98E-40 | 0.3219589  | 0.3   | 0.15  | 4.21E-36 | Monocytes | Cd86     |
| 4.24E-40 | 0.46105815 | 0.21  | 0.093 | 6.00E-36 | Monocytes | Gbp4     |
| 5.76E-40 | 0.28557542 | 0.353 | 0.187 | 8.16E-36 | Monocytes | Fuca1    |
| 9.69E-40 | 0.25724714 | 0.256 | 0.122 | 1.37E-35 | Monocytes | Chd9     |
| 9.87E-40 | 0.36731569 | 0.311 | 0.16  | 1.40E-35 | Monocytes | Atp6ap2  |
| 1.16E-39 | -0.3777529 | 0.881 | 0.86  | 1.65E-35 | Monocytes | Rpl35    |
| 1.47E-39 | -0.3559775 | 0.844 | 0.853 | 2.08E-35 | Monocytes | Rpl15    |
| 2.18E-39 | 0.36179733 | 0.478 | 0.289 | 3.09E-35 | Monocytes | Atp2b1   |
| 2.58E-39 | 0.28460987 | 0.187 | 0.077 | 3.65E-35 | Monocytes | Fcho2    |
| 2.73E-39 | -0.7960665 | 0.383 | 0.487 | 3.86E-35 | Monocytes | Hcst     |
| 3.69E-39 | -0.7207396 | 0.343 | 0.455 | 5.22E-35 | Monocytes | Tuba1a   |
| 4.25E-39 | 0.29389853 | 0.138 | 0.048 | 6.02E-35 | Monocytes | Noct     |
| 4.85E-39 | 0.34244563 | 0.466 | 0.275 | 6.86E-35 | Monocytes | Ap2s1    |
| 5.44E-39 | -0.5561912 | 0.043 | 0.151 | 7.70E-35 | Monocytes | Gimap8   |
| 5.45E-39 | 0.48889354 | 0.418 | 0.25  | 7.71E-35 | Monocytes | M6pr     |
| 6.05E-39 | -0.328218  | 0.872 | 0.879 | 8.57E-35 | Monocytes | Rps14    |
| 6.10E-39 | 0.90845922 | 0.826 | 0.681 | 8.63E-35 | Monocytes | AY036118 |
| 6.19E-39 | 0.28817201 | 0.343 | 0.181 | 8.77E-35 | Monocytes | Psmd7    |
| 7.64E-39 | -0.7913919 | 0.388 | 0.495 | 1.08E-34 | Monocytes | Dusp2    |
| 1.42E-38 | -0.7267864 | 0.106 | 0.225 | 2.01E-34 | Monocytes | Dgka     |
| 2.29E-38 | 0.36274261 | 0.378 | 0.216 | 3.23E-34 | Monocytes | Rtn4     |
| 3.23E-38 | 0.39036602 | 0.782 | 0.679 | 4.57E-34 | Monocytes | H2afz    |
| 3.36E-38 | -0.7726298 | 0.597 | 0.665 | 4.75E-34 | Monocytes | Hspe1    |

|          |            |       |       |          |           |          |
|----------|------------|-------|-------|----------|-----------|----------|
| 3.92E-38 | -0.7426064 | 0.131 | 0.256 | 5.55E-34 | Monocytes | Cd247    |
| 5.53E-38 | 0.37047309 | 0.529 | 0.348 | 7.83E-34 | Monocytes | Atp6v1g1 |
| 7.14E-38 | 0.27952206 | 0.187 | 0.078 | 1.01E-33 | Monocytes | Irf2bp2  |
| 8.03E-38 | 0.30420918 | 0.201 | 0.087 | 1.14E-33 | Monocytes | Filip1l  |
| 9.79E-38 | 0.34253197 | 0.475 | 0.289 | 1.39E-33 | Monocytes | Glud1    |
| 1.14E-37 | 0.3803472  | 0.503 | 0.313 | 1.62E-33 | Monocytes | Uqcr11   |
| 1.31E-37 | 0.37265108 | 0.471 | 0.289 | 1.85E-33 | Monocytes | Ndufc2   |
| 1.33E-37 | -0.7594064 | 0.213 | 0.333 | 1.88E-33 | Monocytes | Rbm38    |
| 1.40E-37 | 0.30838122 | 0.468 | 0.282 | 1.98E-33 | Monocytes | Iscu     |
| 1.43E-37 | -0.9521699 | 0.339 | 0.476 | 2.03E-33 | Monocytes | Cd3g     |
| 1.71E-37 | -0.3492581 | 0.854 | 0.852 | 2.42E-33 | Monocytes | Rps23    |
| 1.86E-37 | 0.51278163 | 0.508 | 0.347 | 2.63E-33 | Monocytes | Capg     |
| 2.51E-37 | -0.6505033 | 0.07  | 0.182 | 3.55E-33 | Monocytes | Lamb3    |
| 2.93E-37 | -0.4799313 | 0.016 | 0.105 | 4.15E-33 | Monocytes | Rras2    |
| 3.49E-37 | 0.31884677 | 0.633 | 0.473 | 4.95E-33 | Monocytes | Rhog     |
| 3.86E-37 | 0.28723631 | 0.229 | 0.106 | 5.46E-33 | Monocytes | Klf10    |
| 3.92E-37 | -0.5801928 | 0.499 | 0.569 | 5.54E-33 | Monocytes | Ube2b    |
| 4.79E-37 | 0.43559937 | 0.559 | 0.385 | 6.78E-33 | Monocytes | Psmb9    |
| 4.89E-37 | 0.26976236 | 0.162 | 0.063 | 6.92E-33 | Monocytes | Epb41l2  |
| 7.47E-37 | 0.45068205 | 0.644 | 0.488 | 1.06E-32 | Monocytes | Rac1     |
| 7.76E-37 | 0.31531682 | 0.351 | 0.192 | 1.10E-32 | Monocytes | Taok3    |
| 1.58E-36 | -0.5124065 | 0.039 | 0.14  | 2.24E-32 | Monocytes | Jakmip1  |
| 1.65E-36 | -0.7005511 | 0.475 | 0.573 | 2.34E-32 | Monocytes | Tsc22d3  |
| 1.99E-36 | 0.31665499 | 0.79  | 0.696 | 2.81E-32 | Monocytes | Clic1    |
| 2.83E-36 | 0.26223193 | 0.46  | 0.28  | 4.00E-32 | Monocytes | Timm10b  |
| 3.53E-36 | 0.34727828 | 0.722 | 0.653 | 5.00E-32 | Monocytes | Gabarap  |
| 4.25E-36 | 0.28883545 | 0.338 | 0.182 | 6.01E-32 | Monocytes | Trappc2l |
| 4.94E-36 | -0.9764868 | 0.171 | 0.294 | 6.99E-32 | Monocytes | Il2rb    |
| 7.97E-36 | -0.7848739 | 0.154 | 0.276 | 1.13E-31 | Monocytes | Cd28     |
| 8.48E-36 | 0.29283811 | 0.214 | 0.099 | 1.20E-31 | Monocytes | Hip1     |
| 9.46E-36 | 0.25865836 | 0.142 | 0.053 | 1.34E-31 | Monocytes | Stx12    |
| 1.69E-35 | -0.5892919 | 0.048 | 0.151 | 2.40E-31 | Monocytes | Traf4    |
| 2.05E-35 | -0.318341  | 0.876 | 0.885 | 2.90E-31 | Monocytes | Rpl28    |
| 2.39E-35 | -0.9347172 | 0.278 | 0.392 | 3.38E-31 | Monocytes | Hsph1    |
| 2.60E-35 | -0.656732  | 0.101 | 0.214 | 3.68E-31 | Monocytes | Gimap9   |
| 3.59E-35 | 0.41340662 | 0.591 | 0.407 | 5.09E-31 | Monocytes | Jun      |
| 4.62E-35 | -0.583969  | 0.513 | 0.597 | 6.53E-31 | Monocytes | Ypel3    |
| 4.97E-35 | 0.29952963 | 0.173 | 0.073 | 7.04E-31 | Monocytes | Man2a1   |
| 5.68E-35 | -0.8044858 | 0.164 | 0.278 | 8.04E-31 | Monocytes | Tcp11l2  |
| 5.86E-35 | 0.62728288 | 0.481 | 0.329 | 8.29E-31 | Monocytes | Rgs1     |
| 6.75E-35 | -0.6565182 | 0.039 | 0.137 | 9.56E-31 | Monocytes | Txk      |
| 7.60E-35 | 0.27254555 | 0.164 | 0.067 | 1.08E-30 | Monocytes | Gbp8     |
| 9.45E-35 | 0.35636163 | 0.367 | 0.21  | 1.34E-30 | Monocytes | Pdia6    |
| 1.03E-34 | -0.7133629 | 0.056 | 0.158 | 1.46E-30 | Monocytes | Blnk     |
| 2.14E-34 | 0.30570017 | 0.188 | 0.084 | 3.02E-30 | Monocytes | Fdps     |
| 2.38E-34 | 0.40608921 | 0.694 | 0.593 | 3.37E-30 | Monocytes | Clta     |
| 3.64E-34 | 0.43873254 | 0.467 | 0.301 | 5.16E-30 | Monocytes | Tapbp    |
| 3.76E-34 | 0.35542197 | 0.485 | 0.307 | 5.32E-30 | Monocytes | Ms4a6b   |

|          |            |       |       |          |           |           |
|----------|------------|-------|-------|----------|-----------|-----------|
| 6.02E-34 | -0.5256392 | 0.482 | 0.553 | 8.52E-30 | Monocytes | Cnn2      |
| 6.04E-34 | 0.31731268 | 0.489 | 0.308 | 8.56E-30 | Monocytes | Rbms1     |
| 6.23E-34 | 0.31660359 | 0.182 | 0.079 | 8.81E-30 | Monocytes | Ripk2     |
| 7.53E-34 | 0.35842152 | 0.433 | 0.26  | 1.07E-29 | Monocytes | Psmg6     |
| 7.75E-34 | 0.25360808 | 0.262 | 0.133 | 1.10E-29 | Monocytes | Psen2     |
| 7.78E-34 | 0.25934286 | 0.385 | 0.219 | 1.10E-29 | Monocytes | Ywhag     |
| 1.61E-33 | -0.4492183 | 0.673 | 0.765 | 2.28E-29 | Monocytes | Ier2      |
| 1.73E-33 | -0.9997759 | 0.621 | 0.646 | 2.44E-29 | Monocytes | Klf2      |
| 1.81E-33 | 0.34041645 | 0.54  | 0.355 | 2.57E-29 | Monocytes | Capns1    |
| 1.87E-33 | -0.7241122 | 0.04  | 0.135 | 2.64E-29 | Monocytes | Serpinb1a |
| 3.27E-33 | 0.2517967  | 0.129 | 0.047 | 4.63E-29 | Monocytes | Bnip3     |
| 3.47E-33 | 0.32998434 | 0.358 | 0.207 | 4.92E-29 | Monocytes | Arrb2     |
| 4.56E-33 | 0.35394731 | 0.661 | 0.53  | 6.46E-29 | Monocytes | Gnai2     |
| 1.54E-32 | -0.717129  | 0.129 | 0.243 | 2.18E-28 | Monocytes | Gpr171    |
| 3.02E-32 | -0.3983251 | 0.766 | 0.809 | 4.28E-28 | Monocytes | Sub1      |
| 4.30E-32 | 0.32676285 | 0.796 | 0.764 | 6.09E-28 | Monocytes | Arpc2     |
| 4.35E-32 | 0.25366758 | 0.181 | 0.081 | 6.15E-28 | Monocytes | Ppp1r12c  |
| 4.77E-32 | 0.37418313 | 0.426 | 0.264 | 6.75E-28 | Monocytes | Pgk1      |
| 8.29E-32 | 0.33489625 | 0.416 | 0.251 | 1.17E-27 | Monocytes | Ndufc1    |
| 1.20E-31 | 0.41852428 | 0.563 | 0.396 | 1.70E-27 | Monocytes | Mrpl52    |
| 1.74E-31 | 0.44576832 | 0.515 | 0.355 | 2.47E-27 | Monocytes | Vdac2     |
| 1.75E-31 | 0.25507424 | 0.857 | 0.841 | 2.47E-27 | Monocytes | Sh3bgrl3  |
| 1.77E-31 | 0.37799373 | 0.712 | 0.595 | 2.51E-27 | Monocytes | Capzb     |
| 2.51E-31 | -0.5661996 | 0.425 | 0.489 | 3.56E-27 | Monocytes | Prkar1a   |
| 2.87E-31 | -0.675302  | 0.409 | 0.483 | 4.06E-27 | Monocytes | Kmt2e     |
| 3.48E-31 | -0.6642413 | 0.405 | 0.475 | 4.92E-27 | Monocytes | Arhgef1   |
| 3.98E-31 | 0.2622441  | 0.184 | 0.084 | 5.64E-27 | Monocytes | Dr1       |
| 4.40E-31 | 0.25598351 | 0.203 | 0.096 | 6.23E-27 | Monocytes | Arap1     |
| 5.24E-31 | 0.25855638 | 0.227 | 0.114 | 7.42E-27 | Monocytes | Gbp7      |
| 5.72E-31 | -0.6668371 | 0.072 | 0.173 | 8.10E-27 | Monocytes | H2-Oa     |
| 7.62E-31 | -0.669418  | 0.026 | 0.109 | 1.08E-26 | Monocytes | Tcf7      |
| 7.98E-31 | 0.40882058 | 0.521 | 0.346 | 1.13E-26 | Monocytes | Psmb6     |
| 8.96E-31 | -0.6145117 | 0.111 | 0.219 | 1.27E-26 | Monocytes | Stat4     |
| 1.54E-30 | -0.6827421 | 0.384 | 0.475 | 2.19E-26 | Monocytes | Dusp5     |
| 1.84E-30 | -0.7665921 | 0.208 | 0.096 | 2.61E-26 | Monocytes | Slpi      |
| 5.52E-30 | -0.2885747 | 0.846 | 0.87  | 7.81E-26 | Monocytes | Rpl29     |
| 6.38E-30 | -0.7168911 | 0.281 | 0.378 | 9.03E-26 | Monocytes | Crem      |
| 2.98E-29 | -0.8105587 | 0.305 | 0.383 | 4.22E-25 | Monocytes | Saraf     |
| 3.44E-29 | 0.2593117  | 0.376 | 0.224 | 4.88E-25 | Monocytes | Uqcc2     |
| 3.56E-29 | 0.31784634 | 0.417 | 0.255 | 5.04E-25 | Monocytes | Txndc17   |
| 6.23E-29 | 0.25383227 | 0.354 | 0.205 | 8.81E-25 | Monocytes | Al413582  |
| 6.38E-29 | -0.4501262 | 0.648 | 0.685 | 9.03E-25 | Monocytes | Hmgb1     |
| 7.07E-29 | 0.52829664 | 0.522 | 0.354 | 1.00E-24 | Monocytes | Neat1     |
| 7.17E-29 | -0.3636123 | 0.736 | 0.771 | 1.01E-24 | Monocytes | Eef1b2    |
| 8.09E-29 | 0.37867824 | 0.526 | 0.36  | 1.14E-24 | Monocytes | Sdhd      |
| 9.43E-29 | 0.31639461 | 0.49  | 0.315 | 1.34E-24 | Monocytes | Brk1      |
| 1.14E-28 | 0.34097105 | 0.54  | 0.372 | 1.62E-24 | Monocytes | Tuba1c    |
| 1.26E-28 | 0.26448531 | 0.205 | 0.101 | 1.78E-24 | Monocytes | Arhgef2   |

|          |            |       |       |          |           |          |
|----------|------------|-------|-------|----------|-----------|----------|
| 1.55E-28 | -0.5643769 | 0.046 | 0.133 | 2.19E-24 | Monocytes | Irf4     |
| 1.88E-28 | -0.6969329 | 0.253 | 0.347 | 2.66E-24 | Monocytes | Rapgef6  |
| 1.91E-28 | 0.25257085 | 0.386 | 0.227 | 2.70E-24 | Monocytes | Ndufb3   |
| 2.28E-28 | 0.32052844 | 0.414 | 0.255 | 3.23E-24 | Monocytes | Psm5     |
| 3.64E-28 | 0.40329637 | 0.479 | 0.317 | 5.15E-24 | Monocytes | Atpif1   |
| 3.74E-28 | 0.29065606 | 0.237 | 0.124 | 5.30E-24 | Monocytes | Cflar    |
| 3.81E-28 | -0.5964728 | 0.177 | 0.275 | 5.40E-24 | Monocytes | Cd164    |
| 4.32E-28 | 0.27454025 | 0.385 | 0.234 | 6.12E-24 | Monocytes | Cmpk1    |
| 4.36E-28 | 0.31815268 | 0.478 | 0.313 | 6.17E-24 | Monocytes | H2afy    |
| 4.65E-28 | 0.3555311  | 0.575 | 0.415 | 6.58E-24 | Monocytes | Ssr4     |
| 5.76E-28 | -0.6340271 | 0.176 | 0.276 | 8.15E-24 | Monocytes | Lbr      |
| 6.84E-28 | -0.4810499 | 0.037 | 0.118 | 9.68E-24 | Monocytes | Tmem163  |
| 6.84E-28 | -0.4296024 | 0.149 | 0.062 | 9.69E-24 | Monocytes | Hcar2    |
| 1.34E-27 | 0.31813063 | 0.476 | 0.313 | 1.90E-23 | Monocytes | Bloc1s1  |
| 1.41E-27 | -0.4193481 | 0.047 | 0.131 | 1.99E-23 | Monocytes | Ppp3cc   |
| 1.79E-27 | 0.31708007 | 0.289 | 0.165 | 2.53E-23 | Monocytes | Pmaip1   |
| 2.01E-27 | -0.9263326 | 0.081 | 0.172 | 2.85E-23 | Monocytes | Dusp10   |
| 2.88E-27 | -0.5927242 | 0.104 | 0.199 | 4.07E-23 | Monocytes | Pde7a    |
| 2.90E-27 | -0.5422282 | 0.044 | 0.128 | 4.11E-23 | Monocytes | Plcx2    |
| 3.11E-27 | 0.35058781 | 0.678 | 0.539 | 4.40E-23 | Monocytes | Cox5a    |
| 3.44E-27 | -0.487765  | 0.173 | 0.077 | 4.87E-23 | Monocytes | Clec4d   |
| 4.07E-27 | 0.33932315 | 0.599 | 0.443 | 5.76E-23 | Monocytes | Scand1   |
| 6.86E-27 | -0.7337453 | 0.153 | 0.247 | 9.71E-23 | Monocytes | Prkcb    |
| 6.88E-27 | 0.43349506 | 0.276 | 0.158 | 9.74E-23 | Monocytes | Cks2     |
| 7.24E-27 | -0.6076942 | 0.179 | 0.081 | 1.02E-22 | Monocytes | Csf3r    |
| 7.35E-27 | 0.38356854 | 0.516 | 0.361 | 1.04E-22 | Monocytes | Fam49b   |
| 7.41E-27 | -1.0345358 | 0.417 | 0.481 | 1.05E-22 | Monocytes | Nkg7     |
| 8.74E-27 | -0.6609371 | 0.195 | 0.286 | 1.24E-22 | Monocytes | Tgfbr2   |
| 9.73E-27 | 0.2893691  | 0.527 | 0.358 | 1.38E-22 | Monocytes | Cmtm7    |
| 1.08E-26 | 0.27533592 | 0.43  | 0.272 | 1.53E-22 | Monocytes | Atp6v1e1 |
| 1.33E-26 | -0.4931647 | 0.062 | 0.148 | 1.89E-22 | Monocytes | Sesn3    |
| 2.26E-26 | -0.4263882 | 0.623 | 0.671 | 3.21E-22 | Monocytes | Calm2    |
| 2.78E-26 | 0.30059115 | 0.421 | 0.273 | 3.94E-22 | Monocytes | P4hb     |
| 3.17E-26 | 0.36383112 | 0.677 | 0.574 | 4.49E-22 | Monocytes | Cox6b1   |
| 4.50E-26 | -0.5461558 | 0.143 | 0.238 | 6.37E-22 | Monocytes | 6-Sep    |
| 6.19E-26 | -0.5669057 | 0.845 | 0.888 | 8.76E-22 | Monocytes | Junb     |
| 8.29E-26 | 0.25381734 | 0.556 | 0.393 | 1.17E-21 | Monocytes | Tuba1b   |
| 9.56E-26 | 0.33192891 | 0.355 | 0.221 | 1.35E-21 | Monocytes | Gltp     |
| 9.94E-26 | -0.6743851 | 0.167 | 0.26  | 1.41E-21 | Monocytes | Rhoh     |
| 1.73E-25 | 0.25662085 | 0.424 | 0.27  | 2.45E-21 | Monocytes | H13      |
| 2.01E-25 | 0.25613051 | 0.502 | 0.34  | 2.85E-21 | Monocytes | Bax      |
| 2.77E-25 | -0.3342865 | 0.946 | 0.923 | 3.92E-21 | Monocytes | Rplp0    |
| 3.34E-25 | 0.29640436 | 0.312 | 0.183 | 4.73E-21 | Monocytes | Med21    |
| 4.37E-25 | -0.4468666 | 0.036 | 0.112 | 6.18E-21 | Monocytes | Mirt1    |
| 4.90E-25 | 0.37263976 | 0.592 | 0.454 | 6.94E-21 | Monocytes | Uqcrb    |
| 5.93E-25 | -0.475963  | 0.645 | 0.712 | 8.40E-21 | Monocytes | Dnaja1   |
| 9.32E-25 | -0.552545  | 0.055 | 0.136 | 1.32E-20 | Monocytes | Fchs2    |
| 1.46E-24 | -0.3812835 | 0.884 | 0.899 | 2.07E-20 | Monocytes | Hsp90ab1 |

|          |            |       |       |          |           |             |
|----------|------------|-------|-------|----------|-----------|-------------|
| 1.68E-24 | -0.540345  | 0.094 | 0.184 | 2.38E-20 | Monocytes | Map4k2      |
| 1.87E-24 | 0.32267762 | 0.596 | 0.443 | 2.64E-20 | Monocytes | Uqcrq       |
| 2.54E-24 | 0.31927116 | 0.515 | 0.353 | 3.60E-20 | Monocytes | Cope        |
| 2.63E-24 | 0.30785436 | 0.732 | 0.688 | 3.73E-20 | Monocytes | Gng5        |
| 3.25E-24 | 0.27725288 | 0.543 | 0.382 | 4.61E-20 | Monocytes | Tmed10      |
| 4.74E-24 | -0.4320591 | 0.048 | 0.125 | 6.71E-20 | Monocytes | Prkd2       |
| 4.82E-24 | -0.469171  | 0.548 | 0.597 | 6.82E-20 | Monocytes | Map1lc3b    |
| 8.13E-24 | 0.25467037 | 0.528 | 0.361 | 1.15E-19 | Monocytes | Ccdc12      |
| 9.69E-24 | -0.6933489 | 0.199 | 0.286 | 1.37E-19 | Monocytes | Smad7       |
| 9.95E-24 | -0.5411739 | 0.476 | 0.524 | 1.41E-19 | Monocytes | Ndfip1      |
| 1.21E-23 | -0.5003984 | 0.526 | 0.585 | 1.71E-19 | Monocytes | Cytip       |
| 1.25E-23 | 0.25289664 | 0.385 | 0.239 | 1.77E-19 | Monocytes | Ndufs3      |
| 1.30E-23 | -0.7390068 | 0.221 | 0.308 | 1.84E-19 | Monocytes | Il21r       |
| 1.45E-23 | -0.5913219 | 0.139 | 0.229 | 2.05E-19 | Monocytes | Nfatc3      |
| 1.76E-23 | -0.5464594 | 0.516 | 0.577 | 2.50E-19 | Monocytes | Zfp36l1     |
| 1.82E-23 | 0.32266858 | 0.53  | 0.375 | 2.58E-19 | Monocytes | Psmb5       |
| 2.43E-23 | -0.3912711 | 0.676 | 0.713 | 3.44E-19 | Monocytes | Pabpc1      |
| 3.51E-23 | -0.4522725 | 0.031 | 0.1   | 4.98E-19 | Monocytes | Btla        |
| 4.42E-23 | 0.3481799  | 0.606 | 0.478 | 6.25E-19 | Monocytes | Cycc        |
| 4.62E-23 | -0.5085889 | 0.469 | 0.509 | 6.55E-19 | Monocytes | Eif4g2      |
| 6.17E-23 | 0.26205758 | 0.322 | 0.198 | 8.74E-19 | Monocytes | Spop        |
| 8.09E-23 | -0.5644064 | 0.307 | 0.375 | 1.15E-18 | Monocytes | Cirbp       |
| 3.43E-22 | -0.4009246 | 0.546 | 0.598 | 4.86E-18 | Monocytes | Pcbp2       |
| 3.63E-22 | 0.38043795 | 0.361 | 0.236 | 5.14E-18 | Monocytes | Itgal       |
| 4.19E-22 | 0.36110203 | 0.238 | 0.135 | 5.92E-18 | Monocytes | Chka        |
| 4.23E-22 | 0.31514297 | 0.664 | 0.551 | 5.99E-18 | Monocytes | Slc25a5     |
| 4.34E-22 | 0.2570622  | 0.371 | 0.234 | 6.14E-18 | Monocytes | Cyb5a       |
| 4.44E-22 | 0.33560166 | 0.714 | 0.641 | 6.29E-18 | Monocytes | Atp5l       |
| 4.63E-22 | -0.4550958 | 0.076 | 0.155 | 6.55E-18 | Monocytes | Fam102a     |
| 4.79E-22 | -0.3510737 | 0.034 | 0.101 | 6.78E-18 | Monocytes | Cdc25b      |
| 5.42E-22 | 0.31724158 | 0.63  | 0.51  | 7.67E-18 | Monocytes | Gnb2        |
| 6.76E-22 | -0.3862147 | 0.043 | 0.115 | 9.57E-18 | Monocytes | Lax1        |
| 7.36E-22 | -0.4425881 | 0.051 | 0.123 | 1.04E-17 | Monocytes | Prkcq       |
| 7.64E-22 | -0.4482703 | 0.142 | 0.228 | 1.08E-17 | Monocytes | Dnajc9      |
| 9.96E-22 | -0.6918197 | 0.229 | 0.303 | 1.41E-17 | Monocytes | Crlf3       |
| 1.00E-21 | -0.4891822 | 0.167 | 0.26  | 1.42E-17 | Monocytes | Gimap7      |
| 1.68E-21 | 0.32111481 | 0.51  | 0.363 | 2.38E-17 | Monocytes | Ifrd1       |
| 1.78E-21 | -0.5126039 | 0.346 | 0.412 | 2.51E-17 | Monocytes | H2afv       |
| 3.39E-21 | 0.31497678 | 0.636 | 0.515 | 4.79E-17 | Monocytes | Arpc4       |
| 4.62E-21 | -0.4815575 | 0.037 | 0.102 | 6.54E-17 | Monocytes | Tmem64      |
| 1.28E-20 | -0.5972304 | 0.177 | 0.254 | 1.82E-16 | Monocytes | Rnf167      |
| 1.51E-20 | -0.4512052 | 0.063 | 0.135 | 2.14E-16 | Monocytes | Card11      |
| 1.54E-20 | -0.6867528 | 0.193 | 0.279 | 2.18E-16 | Monocytes | Tnfrsf18    |
| 1.56E-20 | -0.7743489 | 0.132 | 0.208 | 2.21E-16 | Monocytes | Gramd3      |
| 2.11E-20 | 0.28123578 | 0.778 | 0.754 | 2.98E-16 | Monocytes | Cox4i1      |
| 3.45E-20 | -0.6540548 | 0.247 | 0.32  | 4.89E-16 | Monocytes | 4930523C07F |
| 3.68E-20 | 0.28086662 | 0.905 | 0.909 | 5.21E-16 | Monocytes | mt-Atp8     |
| 3.79E-20 | 0.31561135 | 0.561 | 0.419 | 5.36E-16 | Monocytes | Sh3glb1     |



|          |            |       |       |          |           |         |
|----------|------------|-------|-------|----------|-----------|---------|
| 4.65E-20 | 0.28219995 | 0.533 | 0.392 | 6.58E-16 | Monocytes | Psmb2   |
| 5.06E-20 | -0.3077199 | 0.635 | 0.665 | 7.17E-16 | Monocytes | Rpl23a  |
| 5.59E-20 | -0.5692075 | 0.168 | 0.256 | 7.91E-16 | Monocytes | Cd27    |
| 6.60E-20 | -0.5923324 | 0.534 | 0.581 | 9.34E-16 | Monocytes | H2-Q7   |
| 7.01E-20 | -0.4960069 | 0.117 | 0.194 | 9.92E-16 | Monocytes | Rasal3  |
| 7.58E-20 | -0.5554364 | 0.054 | 0.123 | 1.07E-15 | Monocytes | B3gnt5  |
| 8.25E-20 | -0.953268  | 0.292 | 0.364 | 1.17E-15 | Monocytes | Cd8b1   |
| 9.75E-20 | -0.6944109 | 0.211 | 0.285 | 1.38E-15 | Monocytes | Ptpn22  |
| 1.01E-19 | -0.3936377 | 0.458 | 0.499 | 1.43E-15 | Monocytes | Eef1g   |
| 1.15E-19 | -0.5734013 | 0.326 | 0.378 | 1.63E-15 | Monocytes | Ppp1cc  |
| 1.20E-19 | 0.25991057 | 0.492 | 0.349 | 1.69E-15 | Monocytes | Calr    |
| 1.66E-19 | -0.3740112 | 0.057 | 0.128 | 2.34E-15 | Monocytes | Hip1r   |
| 2.09E-19 | -0.5348682 | 0.193 | 0.275 | 2.95E-15 | Monocytes | Zgpat   |
| 3.00E-19 | -0.53156   | 0.352 | 0.406 | 4.25E-15 | Monocytes | Hmgnt2  |
| 6.03E-19 | -0.5976727 | 0.405 | 0.46  | 8.53E-15 | Monocytes | Tnfaip3 |
| 7.32E-19 | -0.5803918 | 0.221 | 0.292 | 1.04E-14 | Monocytes | Tmem123 |
| 7.69E-19 | -0.3523115 | 0.663 | 0.681 | 1.09E-14 | Monocytes | Npm1    |
| 8.02E-19 | 0.27031051 | 0.457 | 0.314 | 1.14E-14 | Monocytes | Ywhae   |
| 1.11E-18 | -0.6205404 | 0.553 | 0.599 | 1.57E-14 | Monocytes | Nr4a1   |
| 1.16E-18 | 0.48136651 | 0.559 | 0.461 | 1.65E-14 | Monocytes | Mif     |
| 1.20E-18 | -0.5506431 | 0.07  | 0.139 | 1.71E-14 | Monocytes | Eif2ak3 |
| 1.22E-18 | -0.5539293 | 0.146 | 0.218 | 1.73E-14 | Monocytes | Cnp     |
| 1.31E-18 | -0.587855  | 0.132 | 0.206 | 1.86E-14 | Monocytes | Dgkd    |
| 1.33E-18 | -0.4386414 | 0.085 | 0.157 | 1.88E-14 | Monocytes | Rhof    |
| 2.41E-18 | -0.5232019 | 0.115 | 0.189 | 3.41E-14 | Monocytes | Zap70   |
| 2.56E-18 | -0.4628583 | 0.081 | 0.153 | 3.63E-14 | Monocytes | Arap2   |
| 3.47E-18 | -0.3808587 | 0.575 | 0.603 | 4.91E-14 | Monocytes | Gnas    |
| 3.50E-18 | 1.16045564 | 0.484 | 0.346 | 4.95E-14 | Monocytes | Gm26917 |
| 5.12E-18 | -0.7051845 | 0.207 | 0.29  | 7.25E-14 | Monocytes | Icos    |
| 6.53E-18 | -0.6960419 | 0.058 | 0.124 | 9.24E-14 | Monocytes | Tsc22d1 |
| 6.96E-18 | 0.27884924 | 0.702 | 0.613 | 9.85E-14 | Monocytes | Cox5b   |
| 7.09E-18 | -0.5818491 | 0.2   | 0.269 | 1.00E-13 | Monocytes | Plekha2 |
| 7.60E-18 | -0.5265752 | 0.132 | 0.204 | 1.08E-13 | Monocytes | Add1    |
| 7.75E-18 | -0.4165481 | 0.057 | 0.122 | 1.10E-13 | Monocytes | Pim2    |
| 8.02E-18 | 0.31134193 | 0.515 | 0.384 | 1.14E-13 | Monocytes | Atp5g1  |
| 1.03E-17 | -0.6401408 | 0.153 | 0.227 | 1.45E-13 | Monocytes | Bcl2    |
| 1.11E-17 | -1.1956093 | 0.222 | 0.129 | 1.57E-13 | Monocytes | S100a8  |
| 1.17E-17 | -0.4419007 | 0.041 | 0.1   | 1.66E-13 | Monocytes | Zfp318  |
| 1.26E-17 | -0.5873199 | 0.044 | 0.105 | 1.79E-13 | Monocytes | Myc     |
| 2.03E-17 | -0.5616214 | 0.046 | 0.107 | 2.87E-13 | Monocytes | Sfn     |
| 2.35E-17 | -0.4488157 | 0.078 | 0.146 | 3.32E-13 | Monocytes | Gm19585 |
| 2.97E-17 | -0.4783855 | 0.336 | 0.383 | 4.21E-13 | Monocytes | Paip2   |
| 3.28E-17 | -0.389944  | 0.293 | 0.357 | 4.64E-13 | Monocytes | mt-Nd3  |
| 3.75E-17 | -0.258559  | 0.061 | 0.126 | 5.31E-13 | Monocytes | Phgdh   |
| 4.50E-17 | -0.4455368 | 0.662 | 0.682 | 6.37E-13 | Monocytes | Ptprc   |
| 5.83E-17 | -0.4315932 | 0.483 | 0.518 | 8.25E-13 | Monocytes | Mbnl1   |
| 6.11E-17 | -0.8584262 | 0.121 | 0.194 | 8.65E-13 | Monocytes | Prf1    |
| 6.47E-17 | -0.2800619 | 0.648 | 0.678 | 9.16E-13 | Monocytes | Ywhaz   |

|          |            |       |       |          |           |           |
|----------|------------|-------|-------|----------|-----------|-----------|
| 6.85E-17 | -0.5176429 | 0.186 | 0.26  | 9.70E-13 | Monocytes | Add3      |
| 7.22E-17 | -0.6187589 | 0.098 | 0.167 | 1.02E-12 | Monocytes | Cd5       |
| 1.34E-16 | -0.6787511 | 0.123 | 0.19  | 1.89E-12 | Monocytes | Gpr183    |
| 1.36E-16 | -0.3102355 | 0.534 | 0.573 | 1.93E-12 | Monocytes | Eef1d     |
| 1.94E-16 | -0.4119144 | 0.071 | 0.136 | 2.75E-12 | Monocytes | Ppp1r16b  |
| 2.72E-16 | -0.4318055 | 0.076 | 0.139 | 3.84E-12 | Monocytes | Zdhhc18   |
| 2.88E-16 | -0.2778267 | 0.614 | 0.639 | 4.08E-12 | Monocytes | Rpl31     |
| 2.90E-16 | -0.9169483 | 0.159 | 0.231 | 4.10E-12 | Monocytes | Hist1h2ap |
| 5.43E-16 | -0.3723691 | 0.534 | 0.55  | 7.69E-12 | Monocytes | Serbp1    |
| 5.64E-16 | -0.4675397 | 0.443 | 0.472 | 7.98E-12 | Monocytes | Sec62     |
| 7.63E-16 | 0.26828704 | 0.653 | 0.53  | 1.08E-11 | Monocytes | Hint1     |
| 9.52E-16 | -0.8130169 | 0.261 | 0.33  | 1.35E-11 | Monocytes | Cd8a      |
| 9.71E-16 | -0.4181489 | 0.047 | 0.103 | 1.37E-11 | Monocytes | Pde4d     |
| 1.04E-15 | -0.5010814 | 0.219 | 0.281 | 1.48E-11 | Monocytes | Vgll4     |
| 1.29E-15 | -0.4018347 | 0.35  | 0.237 | 1.83E-11 | Monocytes | Ccl3      |
| 1.74E-15 | -0.6326651 | 0.226 | 0.301 | 2.46E-11 | Monocytes | Cst7      |
| 1.83E-15 | -0.4453847 | 0.115 | 0.182 | 2.59E-11 | Monocytes | Kif21b    |
| 1.92E-15 | -0.460938  | 0.105 | 0.171 | 2.72E-11 | Monocytes | Inpp4b    |
| 1.99E-15 | -0.8456612 | 0.225 | 0.292 | 2.82E-11 | Monocytes | Pdcd1     |
| 2.01E-15 | -0.7526678 | 0.075 | 0.137 | 2.84E-11 | Monocytes | Il7r      |
| 2.07E-15 | -0.5907452 | 0.084 | 0.146 | 2.92E-11 | Monocytes | Hvcn1     |
| 2.35E-15 | -0.4108184 | 0.094 | 0.158 | 3.33E-11 | Monocytes | Rasgrp1   |
| 2.96E-15 | -0.4197308 | 0.705 | 0.734 | 4.19E-11 | Monocytes | Hsp90aa1  |
| 3.04E-15 | -0.4786582 | 0.207 | 0.269 | 4.31E-11 | Monocytes | Matr3     |
| 3.15E-15 | 0.27142266 | 0.206 | 0.128 | 4.46E-11 | Monocytes | Ddit4     |
| 3.25E-15 | -0.3289281 | 0.047 | 0.102 | 4.60E-11 | Monocytes | Gpr174    |
| 3.28E-15 | -0.7117689 | 0.224 | 0.293 | 4.65E-11 | Monocytes | Tigit     |
| 3.71E-15 | -0.9342886 | 0.193 | 0.249 | 5.25E-11 | Monocytes | Mef2c     |
| 4.97E-15 | 0.32611713 | 0.536 | 0.404 | 7.03E-11 | Monocytes | Rap1a     |
| 6.46E-15 | -0.3910539 | 0.504 | 0.535 | 9.15E-11 | Monocytes | Hnrnpf    |
| 6.94E-15 | 0.28456887 | 0.49  | 0.36  | 9.82E-11 | Monocytes | Ndufv3    |
| 9.91E-15 | -0.5513674 | 0.167 | 0.226 | 1.40E-10 | Monocytes | Pdcd4     |
| 1.13E-14 | -0.4067282 | 0.486 | 0.517 | 1.60E-10 | Monocytes | Akap13    |
| 1.53E-14 | -0.3824994 | 0.06  | 0.117 | 2.17E-10 | Monocytes | Sytl3     |
| 1.56E-14 | -0.4898518 | 0.279 | 0.332 | 2.21E-10 | Monocytes | Eif4a2    |
| 2.93E-14 | -0.375187  | 0.094 | 0.156 | 4.14E-10 | Monocytes | Sh2d1a    |
| 3.16E-14 | -0.2655876 | 0.559 | 0.588 | 4.48E-10 | Monocytes | Snrpg     |
| 4.16E-14 | -0.4129175 | 0.064 | 0.12  | 5.89E-10 | Monocytes | Frat2     |
| 7.15E-14 | -0.4615889 | 0.154 | 0.214 | 1.01E-09 | Monocytes | Grk6      |
| 8.00E-14 | 0.30626986 | 0.653 | 0.593 | 1.13E-09 | Monocytes | Sec61g    |
| 8.56E-14 | -0.4581517 | 0.093 | 0.152 | 1.21E-09 | Monocytes | Tecpr1    |
| 1.10E-13 | -0.5442723 | 0.091 | 0.151 | 1.56E-09 | Monocytes | Fasl      |
| 1.15E-13 | -0.4514376 | 0.248 | 0.305 | 1.62E-09 | Monocytes | Acp5      |
| 1.22E-13 | -0.4819016 | 0.588 | 0.609 | 1.72E-09 | Monocytes | Arl6ip1   |
| 1.68E-13 | -0.3911944 | 0.08  | 0.137 | 2.38E-09 | Monocytes | Sla2      |
| 1.90E-13 | -0.476936  | 0.149 | 0.211 | 2.69E-09 | Monocytes | Cenpa     |
| 1.93E-13 | -0.4730804 | 0.142 | 0.203 | 2.73E-09 | Monocytes | Chd2      |
| 1.95E-13 | -0.5186216 | 0.377 | 0.418 | 2.76E-09 | Monocytes | H2-Q6     |

|          |            |       |       |          |           |         |
|----------|------------|-------|-------|----------|-----------|---------|
| 2.74E-13 | -0.4766249 | 0.111 | 0.168 | 3.88E-09 | Monocytes | Tcf3    |
| 3.06E-13 | -0.3613132 | 0.052 | 0.103 | 4.33E-09 | Monocytes | Ephx1   |
| 3.55E-13 | -0.5740802 | 0.061 | 0.114 | 5.03E-09 | Monocytes | Klre1   |
| 3.91E-13 | -0.4362642 | 0.115 | 0.174 | 5.53E-09 | Monocytes | Man1a   |
| 4.41E-13 | 0.25990469 | 0.705 | 0.64  | 6.24E-09 | Monocytes | Ybx1    |
| 4.50E-13 | -0.3694021 | 0.487 | 0.503 | 6.37E-09 | Monocytes | Tra2b   |
| 4.77E-13 | 0.25510074 | 0.564 | 0.447 | 6.75E-09 | Monocytes | Cox7b   |
| 4.89E-13 | -0.3643541 | 0.504 | 0.52  | 6.92E-09 | Monocytes | Ncl     |
| 5.49E-13 | -1.2443972 | 0.194 | 0.255 | 7.77E-09 | Monocytes | Gzmb    |
| 5.76E-13 | -0.3684364 | 0.06  | 0.113 | 8.15E-09 | Monocytes | Trim59  |
| 1.14E-12 | -0.4838925 | 0.227 | 0.285 | 1.61E-08 | Monocytes | Rasgrp2 |
| 1.20E-12 | -0.5249549 | 0.071 | 0.124 | 1.70E-08 | Monocytes | Fam43a  |
| 1.32E-12 | -0.4537314 | 0.185 | 0.241 | 1.86E-08 | Monocytes | Slc1a5  |
| 1.44E-12 | -0.5273796 | 0.333 | 0.368 | 2.04E-08 | Monocytes | Peli1   |
| 1.53E-12 | -0.5208533 | 0.203 | 0.256 | 2.16E-08 | Monocytes | Smc4    |
| 1.64E-12 | 0.25995486 | 0.568 | 0.449 | 2.32E-08 | Monocytes | Rbx1    |
| 1.80E-12 | -0.4199918 | 0.875 | 0.873 | 2.55E-08 | Monocytes | Hspa8   |
| 2.24E-12 | -0.4603279 | 0.105 | 0.16  | 3.17E-08 | Monocytes | Sh3bp5  |
| 2.43E-12 | -0.3804192 | 0.086 | 0.14  | 3.44E-08 | Monocytes | Klk8    |
| 3.90E-12 | -0.3955817 | 0.067 | 0.118 | 5.52E-08 | Monocytes | Bcl11b  |
| 4.91E-12 | -0.3612832 | 0.07  | 0.121 | 6.96E-08 | Monocytes | Cdt1    |
| 5.26E-12 | -0.3783555 | 0.105 | 0.158 | 7.45E-08 | Monocytes | Arl2bp  |
| 6.02E-12 | -0.3644699 | 0.27  | 0.317 | 8.52E-08 | Monocytes | Fkbp3   |
| 6.73E-12 | -0.4783667 | 0.108 | 0.16  | 9.53E-08 | Monocytes | Rnf145  |
| 7.72E-12 | -0.4080093 | 0.393 | 0.422 | 1.09E-07 | Monocytes | Clk1    |
| 7.76E-12 | -0.4265437 | 0.383 | 0.409 | 1.10E-07 | Monocytes | Sp100   |
| 1.03E-11 | -0.5518443 | 0.206 | 0.254 | 1.46E-07 | Monocytes | H2afx   |
| 1.04E-11 | -0.3726215 | 0.493 | 0.499 | 1.48E-07 | Monocytes | Ppp1r18 |
| 1.22E-11 | -0.418469  | 0.195 | 0.248 | 1.72E-07 | Monocytes | Psip1   |
| 1.28E-11 | -1.0828359 | 0.169 | 0.101 | 1.81E-07 | Monocytes | Il1r2   |
| 1.44E-11 | -0.2945468 | 0.744 | 0.615 | 2.04E-07 | Monocytes | S100a11 |
| 1.59E-11 | -0.5075084 | 0.132 | 0.185 | 2.26E-07 | Monocytes | Srpk2   |
| 1.77E-11 | -0.3267379 | 0.187 | 0.116 | 2.51E-07 | Monocytes | Adam8   |
| 1.90E-11 | -0.6613391 | 0.471 | 0.47  | 2.70E-07 | Monocytes | Serp1   |
| 2.06E-11 | -0.4215697 | 0.25  | 0.3   | 2.91E-07 | Monocytes | Tes     |
| 2.44E-11 | -0.4082538 | 0.091 | 0.142 | 3.45E-07 | Monocytes | Cers4   |
| 3.38E-11 | -0.4070201 | 0.416 | 0.427 | 4.78E-07 | Monocytes | Ube2s   |
| 4.63E-11 | -0.4920286 | 0.091 | 0.141 | 6.56E-07 | Monocytes | Cd6     |
| 6.49E-11 | -0.7539132 | 0.268 | 0.32  | 9.19E-07 | Monocytes | Klrd1   |
| 7.14E-11 | -0.495539  | 0.187 | 0.232 | 1.01E-06 | Monocytes | Zdhhc20 |
| 1.14E-10 | -0.5380041 | 0.352 | 0.379 | 1.61E-06 | Monocytes | Dennd4a |
| 1.29E-10 | -0.4768334 | 0.188 | 0.239 | 1.83E-06 | Monocytes | Dut     |
| 1.32E-10 | -0.4060698 | 0.251 | 0.305 | 1.87E-06 | Monocytes | Ccnd2   |
| 1.41E-10 | -0.4845483 | 0.201 | 0.244 | 1.99E-06 | Monocytes | Fli1    |
| 1.65E-10 | -0.5218219 | 0.114 | 0.162 | 2.33E-06 | Monocytes | Pxk     |
| 2.77E-10 | -0.4104796 | 0.342 | 0.372 | 3.92E-06 | Monocytes | Stk24   |
| 2.78E-10 | -1.0211232 | 0.138 | 0.082 | 3.94E-06 | Monocytes | G0s2    |
| 2.95E-10 | -0.3517173 | 0.085 | 0.134 | 4.18E-06 | Monocytes | Nup210  |

|          |            |       |       |            |           |           |
|----------|------------|-------|-------|------------|-----------|-----------|
| 3.05E-10 | -0.4085446 | 0.261 | 0.302 | 4.31E-06   | Monocytes | Slbp      |
| 3.13E-10 | -0.3992169 | 0.075 | 0.12  | 4.43E-06   | Monocytes | Slamf6    |
| 3.31E-10 | -0.401442  | 0.118 | 0.167 | 4.68E-06   | Monocytes | Pitpnc1   |
| 4.10E-10 | -0.3965768 | 0.303 | 0.336 | 5.81E-06   | Monocytes | Pdpf      |
| 4.29E-10 | -0.4663837 | 0.147 | 0.193 | 6.07E-06   | Monocytes | Isca1     |
| 4.37E-10 | -0.4284588 | 0.425 | 0.436 | 6.19E-06   | Monocytes | Arf6      |
| 4.73E-10 | -0.5239602 | 0.118 | 0.165 | 6.69E-06   | Monocytes | Dmxl1     |
| 5.89E-10 | -0.4170587 | 0.143 | 0.197 | 8.33E-06   | Monocytes | Tox       |
| 5.97E-10 | -0.4139256 | 0.101 | 0.148 | 8.45E-06   | Monocytes | Sesn1     |
| 6.51E-10 | -0.4985183 | 0.079 | 0.125 | 9.21E-06   | Monocytes | Serpinb6b |
| 7.93E-10 | -0.4370817 | 0.219 | 0.265 | 1.12E-05   | Monocytes | Nedd9     |
| 8.12E-10 | -0.4409855 | 0.146 | 0.193 | 1.15E-05   | Monocytes | Btg3      |
| 1.05E-09 | -0.4479525 | 0.082 | 0.125 | 1.49E-05   | Monocytes | Cfap43    |
| 1.21E-09 | -0.6280419 | 0.163 | 0.216 | 1.72E-05   | Monocytes | Ctla2a    |
| 1.43E-09 | -0.3992805 | 0.303 | 0.332 | 2.03E-05   | Monocytes | Mettl23   |
| 1.44E-09 | -0.3260956 | 0.456 | 0.462 | 2.04E-05   | Monocytes | Gabarapl2 |
| 1.57E-09 | -0.4441489 | 0.185 | 0.228 | 2.22E-05   | Monocytes | Fkbp4     |
| 1.65E-09 | -0.4732708 | 0.146 | 0.192 | 2.33E-05   | Monocytes | Stt3b     |
| 1.67E-09 | -0.4144342 | 0.08  | 0.124 | 2.36E-05   | Monocytes | Actn1     |
| 1.71E-09 | -0.4949113 | 0.226 | 0.265 | 2.42E-05   | Monocytes | Aff4      |
| 1.75E-09 | -0.3864552 | 0.358 | 0.381 | 2.47E-05   | Monocytes | Sf1       |
| 2.20E-09 | -0.4263852 | 0.357 | 0.374 | 3.12E-05   | Monocytes | Dnajb6    |
| 2.74E-09 | -0.3059786 | 0.669 | 0.472 | 3.88E-05   | Monocytes | Lgals1    |
| 2.86E-09 | -0.4342206 | 0.405 | 0.424 | 4.05E-05   | Monocytes | Slc38a2   |
| 3.22E-09 | -0.3305761 | 0.112 | 0.158 | 4.56E-05   | Monocytes | Spint2    |
| 3.23E-09 | -0.4342894 | 0.249 | 0.282 | 4.58E-05   | Monocytes | Mif4gd    |
| 3.56E-09 | -0.4315357 | 0.145 | 0.189 | 5.04E-05   | Monocytes | Sun2      |
| 3.91E-09 | -0.3053292 | 0.109 | 0.155 | 5.53E-05   | Monocytes | Mllt3     |
| 4.43E-09 | -0.5300223 | 0.14  | 0.182 | 6.27E-05   | Monocytes | Cerk      |
| 4.44E-09 | -1.2181595 | 0.213 | 0.148 | 6.29E-05   | Monocytes | S100a9    |
| 4.66E-09 | -0.3978457 | 0.079 | 0.122 | 6.60E-05   | Monocytes | Tbx21     |
| 4.73E-09 | -0.4021215 | 0.518 | 0.53  | 6.70E-05   | Monocytes | Ppp1r15a  |
| 5.62E-09 | -0.3783709 | 0.073 | 0.114 | 7.95E-05   | Monocytes | Tfam      |
| 6.91E-09 | -0.3570797 | 0.135 | 0.179 | 9.78E-05   | Monocytes | Fam3c     |
| 8.25E-09 | -0.4587182 | 0.169 | 0.209 | 0.00011675 | Monocytes | Abhd17b   |
| 1.01E-08 | -0.4286902 | 0.165 | 0.208 | 0.00014272 | Monocytes | Sptbn1    |
| 1.02E-08 | -0.320001  | 0.109 | 0.154 | 0.00014455 | Monocytes | Cdk17     |
| 1.10E-08 | -0.536565  | 0.219 | 0.26  | 0.00015585 | Monocytes | Prkch     |
| 1.23E-08 | -0.7733972 | 0.202 | 0.249 | 0.00017352 | Monocytes | Ctla4     |
| 1.41E-08 | -0.3941665 | 0.084 | 0.127 | 0.00019949 | Monocytes | Hist1h1e  |
| 1.72E-08 | -0.3188363 | 0.078 | 0.119 | 0.00024292 | Monocytes | Tmem71    |
| 1.72E-08 | -0.3640446 | 0.389 | 0.398 | 0.00024299 | Monocytes | Bzw1      |
| 1.87E-08 | -0.4729776 | 0.252 | 0.285 | 0.00026417 | Monocytes | Isy1      |
| 2.11E-08 | -0.4323137 | 0.305 | 0.327 | 0.0002981  | Monocytes | Pole4     |
| 2.33E-08 | -0.4230021 | 0.106 | 0.147 | 0.00033032 | Monocytes | Avl9      |
| 2.91E-08 | -0.3206669 | 0.419 | 0.426 | 0.00041261 | Monocytes | Ube2d2a   |
| 4.25E-08 | -0.3387606 | 0.42  | 0.422 | 0.00060142 | Monocytes | Hnrnp1    |
| 4.28E-08 | -0.3298614 | 0.47  | 0.471 | 0.00060537 | Monocytes | Srsf7     |

|          |            |       |       |            |           |             |
|----------|------------|-------|-------|------------|-----------|-------------|
| 4.74E-08 | -0.3397172 | 0.33  | 0.349 | 0.00067151 | Monocytes | Polr2a      |
| 5.35E-08 | -0.3897327 | 0.109 | 0.147 | 0.00075676 | Monocytes | Clp1        |
| 5.58E-08 | -0.4143837 | 0.384 | 0.39  | 0.00078956 | Monocytes | Luc7l2      |
| 5.83E-08 | 0.33786295 | 0.317 | 0.242 | 0.0008247  | Monocytes | Socs1       |
| 6.21E-08 | -0.3207159 | 0.097 | 0.137 | 0.00087954 | Monocytes | Mgst2       |
| 7.09E-08 | -0.4178337 | 0.094 | 0.134 | 0.00100391 | Monocytes | Hist1h1c    |
| 7.15E-08 | -0.3143311 | 0.45  | 0.449 | 0.00101255 | Monocytes | Hnrnpab     |
| 7.27E-08 | -0.3200558 | 0.067 | 0.105 | 0.00102872 | Monocytes | Ifitm10     |
| 7.77E-08 | -0.3950841 | 0.292 | 0.332 | 0.00110021 | Monocytes | Mrps6       |
| 9.49E-08 | -0.4982074 | 0.294 | 0.311 | 0.00134401 | Monocytes | Smim14      |
| 1.12E-07 | -0.4716329 | 0.111 | 0.148 | 0.00158742 | Monocytes | Chchd10     |
| 1.18E-07 | -0.2965624 | 0.085 | 0.123 | 0.00167318 | Monocytes | Fam189b     |
| 1.26E-07 | -0.3710024 | 0.315 | 0.343 | 0.00178762 | Monocytes | Macf1       |
| 1.87E-07 | -0.2571676 | 0.423 | 0.428 | 0.00265262 | Monocytes | Hnrnpa1     |
| 1.94E-07 | -0.2578362 | 0.564 | 0.557 | 0.00274824 | Monocytes | Srrm2       |
| 2.16E-07 | -0.4398806 | 0.22  | 0.252 | 0.00305255 | Monocytes | Nfatc1      |
| 2.78E-07 | -0.5353447 | 0.144 | 0.178 | 0.00394198 | Monocytes | Ero1lb      |
| 2.88E-07 | -0.3766333 | 0.344 | 0.36  | 0.00407839 | Monocytes | Sfpq        |
| 2.92E-07 | -0.4076866 | 0.248 | 0.27  | 0.00412701 | Monocytes | Tprgl       |
| 2.98E-07 | -0.4705561 | 0.227 | 0.252 | 0.00421914 | Monocytes | Smap2       |
| 3.02E-07 | -0.4668076 | 0.178 | 0.213 | 0.00427359 | Monocytes | Chd3        |
| 3.21E-07 | -0.4221128 | 0.131 | 0.168 | 0.00454309 | Monocytes | Etnk1       |
| 3.49E-07 | -0.3093946 | 0.07  | 0.105 | 0.00493572 | Monocytes | Itm2a       |
| 3.62E-07 | -0.3834098 | 0.186 | 0.221 | 0.00512082 | Monocytes | Cbx4        |
| 3.84E-07 | -0.4082856 | 0.319 | 0.334 | 0.00543067 | Monocytes | Cacybp      |
| 3.95E-07 | -0.4289506 | 0.395 | 0.411 | 0.00558742 | Monocytes | Txnip       |
| 4.61E-07 | -0.2935178 | 0.076 | 0.111 | 0.0065194  | Monocytes | Senp7       |
| 4.94E-07 | -0.4781979 | 0.152 | 0.187 | 0.0069973  | Monocytes | Elmsan1     |
| 6.55E-07 | -0.3682208 | 0.132 | 0.168 | 0.00926865 | Monocytes | Dedd2       |
| 6.81E-07 | -0.4768945 | 0.301 | 0.327 | 0.00963738 | Monocytes | Cxcr4       |
| 8.47E-07 | -0.3470609 | 0.088 | 0.123 | 0.01199382 | Monocytes | Grap2       |
| 9.98E-07 | -0.3038988 | 0.081 | 0.115 | 0.01412391 | Monocytes | Unc45a      |
| 1.02E-06 | -0.3650066 | 0.227 | 0.251 | 0.0144897  | Monocytes | Rbbp4       |
| 1.06E-06 | -0.4329115 | 0.182 | 0.213 | 0.01494414 | Monocytes | Rcsd1       |
| 1.14E-06 | -0.371245  | 0.16  | 0.194 | 0.0161167  | Monocytes | Amd1        |
| 1.15E-06 | -0.377809  | 0.149 | 0.183 | 0.01631643 | Monocytes | Vars        |
| 1.45E-06 | -0.3269119 | 0.126 | 0.161 | 0.02050785 | Monocytes | Prrc2b      |
| 1.48E-06 | -0.4124    | 0.193 | 0.227 | 0.02091678 | Monocytes | Tob1        |
| 1.79E-06 | -0.286349  | 0.069 | 0.102 | 0.02528747 | Monocytes | Ttc3        |
| 1.92E-06 | -0.3949972 | 0.203 | 0.235 | 0.02715217 | Monocytes | D16Ertd472e |
| 1.97E-06 | -0.2635369 | 0.451 | 0.448 | 0.02795164 | Monocytes | Nol7        |
| 2.00E-06 | -0.36828   | 0.301 | 0.315 | 0.02830407 | Monocytes | Rnf187      |
| 2.02E-06 | -0.4432059 | 0.203 | 0.229 | 0.02862166 | Monocytes | Rnf138      |
| 2.19E-06 | -0.5290175 | 0.557 | 0.528 | 0.03095942 | Monocytes | Hmgb2       |
| 2.89E-06 | -0.2953104 | 0.092 | 0.124 | 0.04089879 | Monocytes | Ccng2       |
| 3.54E-06 | -0.3449685 | 0.093 | 0.125 | 0.05004242 | Monocytes | Hmces       |
| 4.12E-06 | -0.3519617 | 0.118 | 0.15  | 0.05828946 | Monocytes | Swt1        |
| 4.38E-06 | -0.4155512 | 0.146 | 0.177 | 0.06204168 | Monocytes | Gtf2i       |

|          |            |       |       |            |           |             |
|----------|------------|-------|-------|------------|-----------|-------------|
| 4.51E-06 | -0.4119132 | 0.208 | 0.236 | 0.06379866 | Monocytes | Odc1        |
| 4.68E-06 | -0.518791  | 0.141 | 0.175 | 0.06622699 | Monocytes | Tnfrsf9     |
| 4.90E-06 | -0.3367052 | 0.112 | 0.145 | 0.06943463 | Monocytes | Ii16        |
| 5.28E-06 | -0.2870465 | 0.522 | 0.503 | 0.07469891 | Monocytes | Srsf5       |
| 5.35E-06 | -0.3212373 | 0.101 | 0.133 | 0.07573803 | Monocytes | Ccdc117     |
| 5.76E-06 | -0.4077814 | 0.343 | 0.345 | 0.08157375 | Monocytes | Ywhaq       |
| 6.39E-06 | -0.4487707 | 0.096 | 0.128 | 0.09049473 | Monocytes | Rgs16       |
| 6.43E-06 | -0.3679978 | 0.19  | 0.219 | 0.09108903 | Monocytes | Top2b       |
| 7.53E-06 | -0.4147742 | 0.149 | 0.178 | 0.10653989 | Monocytes | B3gnt2      |
| 7.74E-06 | -0.6246523 | 0.107 | 0.07  | 0.10951281 | Monocytes | Slc7a11     |
| 8.15E-06 | -0.3687568 | 0.207 | 0.233 | 0.11533244 | Monocytes | Tuba4a      |
| 8.78E-06 | -0.293035  | 0.383 | 0.38  | 0.12426724 | Monocytes | Syf2        |
| 9.52E-06 | -0.374708  | 0.322 | 0.329 | 0.13477277 | Monocytes | Stk4        |
| 9.92E-06 | -0.3587806 | 0.379 | 0.376 | 0.14043276 | Monocytes | BC031181    |
| 1.06E-05 | -0.3421505 | 0.167 | 0.195 | 0.15017185 | Monocytes | Uchl3       |
| 1.12E-05 | -0.2705606 | 0.084 | 0.114 | 0.15872206 | Monocytes | Msi2        |
| 1.14E-05 | -0.3190878 | 0.417 | 0.403 | 0.1609432  | Monocytes | Skp1a       |
| 1.15E-05 | -0.2960986 | 0.091 | 0.123 | 0.16294319 | Monocytes | Cd226       |
| 1.16E-05 | -0.4232804 | 0.262 | 0.279 | 0.16370291 | Monocytes | Ddx6        |
| 1.18E-05 | -0.3323847 | 0.084 | 0.115 | 0.16769045 | Monocytes | Arsb        |
| 1.31E-05 | -0.4962297 | 0.289 | 0.3   | 0.1850045  | Monocytes | Cdk11b      |
| 1.44E-05 | -0.3334652 | 0.122 | 0.153 | 0.20406876 | Monocytes | Ogt         |
| 1.60E-05 | -0.4067811 | 0.344 | 0.343 | 0.22616512 | Monocytes | B4galnt1    |
| 1.67E-05 | -0.3754847 | 0.127 | 0.156 | 0.23694893 | Monocytes | Crebrf      |
| 1.79E-05 | -0.45302   | 0.118 | 0.146 | 0.25359289 | Monocytes | Swap70      |
| 1.80E-05 | -0.4065596 | 0.29  | 0.303 | 0.2546111  | Monocytes | Zc3hav1     |
| 2.58E-05 | -0.3697076 | 0.122 | 0.149 | 0.36458938 | Monocytes | Csnk1g3     |
| 2.72E-05 | -0.31066   | 0.303 | 0.318 | 0.38439382 | Monocytes | Hnrnph1     |
| 2.72E-05 | -0.4512424 | 0.137 | 0.164 | 0.38503725 | Monocytes | Gpr18       |
| 2.92E-05 | -0.3820442 | 0.168 | 0.194 | 0.41367938 | Monocytes | Tiprl       |
| 2.99E-05 | -0.3370629 | 0.125 | 0.153 | 0.42260021 | Monocytes | Arhgap4     |
| 3.25E-05 | -0.3788772 | 0.2   | 0.222 | 0.46040806 | Monocytes | Stip1       |
| 3.49E-05 | -0.4304457 | 0.173 | 0.199 | 0.49357558 | Monocytes | Rinl        |
| 3.70E-05 | -0.7395311 | 0.204 | 0.228 | 0.52377734 | Monocytes | Lag3        |
| 4.17E-05 | -0.4080147 | 0.194 | 0.218 | 0.58990631 | Monocytes | Tnrc6b      |
| 4.47E-05 | -0.371831  | 0.143 | 0.171 | 0.63296837 | Monocytes | Fryl        |
| 4.78E-05 | -0.3851197 | 0.226 | 0.244 | 0.67633045 | Monocytes | Akna        |
| 4.80E-05 | -0.3873735 | 0.333 | 0.337 | 0.67994553 | Monocytes | Ncor1       |
| 4.94E-05 | -0.2897215 | 0.16  | 0.188 | 0.69950204 | Monocytes | 4932438A13I |
| 5.11E-05 | -0.4319754 | 0.297 | 0.302 | 0.72313868 | Monocytes | Tmod3       |
| 5.52E-05 | -0.3003515 | 0.115 | 0.143 | 0.78148    | Monocytes | Traf3ip3    |
| 5.70E-05 | -0.2707505 | 0.471 | 0.457 | 0.80732116 | Monocytes | Srp14       |
| 5.76E-05 | -0.3509743 | 0.148 | 0.176 | 0.81575106 | Monocytes | Suco        |
| 6.19E-05 | -0.3261504 | 0.418 | 0.402 | 0.87577421 | Monocytes | Sf3b2       |
| 6.57E-05 | -0.45824   | 0.146 | 0.171 | 0.9301272  | Monocytes | Gm26740     |
| 6.66E-05 | -0.3221622 | 0.27  | 0.281 | 0.94272696 | Monocytes | Khdrbs1     |
| 6.72E-05 | -0.2975855 | 0.153 | 0.178 | 0.95143569 | Monocytes | Mfap1b      |
| 7.31E-05 | -0.904565  | 0.7   | 0.501 | 1          | Monocytes | Ccl5        |

|            |            |       |       |   |           |             |
|------------|------------|-------|-------|---|-----------|-------------|
| 7.42E-05   | -0.3378224 | 0.123 | 0.148 | 1 | Monocytes | Flt3l       |
| 7.64E-05   | -0.2554945 | 0.117 | 0.145 | 1 | Monocytes | Usp38       |
| 8.63E-05   | -0.4087343 | 0.394 | 0.382 | 1 | Monocytes | Hspa4       |
| 8.69E-05   | -0.3698348 | 0.272 | 0.287 | 1 | Monocytes | Arid5a      |
| 8.89E-05   | -0.3986405 | 0.16  | 0.183 | 1 | Monocytes | Mfap1a      |
| 9.27E-05   | -0.314588  | 0.191 | 0.213 | 1 | Monocytes | Sms         |
| 0.00010274 | -0.2570781 | 0.085 | 0.112 | 1 | Monocytes | Myo1e       |
| 0.00011164 | -0.3523768 | 0.301 | 0.303 | 1 | Monocytes | Anxa6       |
| 0.0001164  | -0.2799932 | 0.363 | 0.36  | 1 | Monocytes | Emg1        |
| 0.00012624 | -0.405584  | 0.207 | 0.224 | 1 | Monocytes | Bptf        |
| 0.00013627 | -0.3151534 | 0.118 | 0.144 | 1 | Monocytes | Clcn3       |
| 0.00014062 | -0.2826987 | 0.517 | 0.495 | 1 | Monocytes | Pcbp1       |
| 0.00014311 | -0.3140848 | 0.475 | 0.454 | 1 | Monocytes | Eif5        |
| 0.00014728 | -0.2960673 | 0.154 | 0.177 | 1 | Monocytes | Polr2m      |
| 0.00015665 | -0.2853657 | 0.162 | 0.187 | 1 | Monocytes | Krit1       |
| 0.00015688 | -0.4076712 | 0.188 | 0.207 | 1 | Monocytes | Pcmd1       |
| 0.00016879 | 0.2956509  | 0.862 | 0.866 | 1 | Monocytes | mt-Nd1      |
| 0.00017807 | -0.2541606 | 0.465 | 0.447 | 1 | Monocytes | Cox17       |
| 0.00018327 | -0.3570298 | 0.235 | 0.252 | 1 | Monocytes | Arhgap15    |
| 0.00018543 | -0.416181  | 0.236 | 0.249 | 1 | Monocytes | Cyth1       |
| 0.00019335 | -0.3221631 | 0.113 | 0.137 | 1 | Monocytes | Helz2       |
| 0.00019946 | -0.3100146 | 0.084 | 0.107 | 1 | Monocytes | Trp53inp2   |
| 0.00020439 | -0.3044217 | 0.083 | 0.106 | 1 | Monocytes | Rpia        |
| 0.00021514 | -0.3566272 | 0.296 | 0.299 | 1 | Monocytes | Slc50a1     |
| 0.00021807 | -0.3517559 | 0.184 | 0.205 | 1 | Monocytes | Tagap       |
| 0.00021891 | -0.2855775 | 0.265 | 0.275 | 1 | Monocytes | Eif4b       |
| 0.00022035 | -0.5623484 | 0.189 | 0.21  | 1 | Monocytes | Dgat1       |
| 0.00025918 | -0.2958483 | 0.441 | 0.435 | 1 | Monocytes | Tpr         |
| 0.00026489 | -0.3523296 | 0.144 | 0.165 | 1 | Monocytes | Rnf44       |
| 0.00029963 | -0.4377391 | 0.209 | 0.227 | 1 | Monocytes | Arhgap31    |
| 0.00030223 | -0.3712184 | 0.28  | 0.288 | 1 | Monocytes | Phf20l1     |
| 0.0003102  | -0.2708165 | 0.089 | 0.113 | 1 | Monocytes | Brwd1       |
| 0.00032777 | -0.2938191 | 0.123 | 0.145 | 1 | Monocytes | Rfk         |
| 0.00044039 | -0.2560427 | 0.134 | 0.156 | 1 | Monocytes | 5031425E22f |
| 0.00044065 | -0.3235725 | 0.363 | 0.352 | 1 | Monocytes | Rp9         |
| 0.00046494 | -0.4701051 | 0.09  | 0.114 | 1 | Monocytes | Serpib9     |
| 0.0004776  | -0.6298237 | 0.157 | 0.184 | 1 | Monocytes | Cd7         |
| 0.00048786 | -0.4703915 | 0.379 | 0.363 | 1 | Monocytes | Ubal2       |
| 0.00050328 | -0.2850164 | 0.083 | 0.106 | 1 | Monocytes | Elk4        |
| 0.00051454 | -0.329171  | 0.139 | 0.161 | 1 | Monocytes | Sidt2       |
| 0.00057585 | -0.284983  | 0.379 | 0.376 | 1 | Monocytes | Prrc2c      |
| 0.00060051 | -0.3631977 | 0.174 | 0.197 | 1 | Monocytes | Stmn1       |
| 0.00063213 | -0.3379047 | 0.133 | 0.153 | 1 | Monocytes | Gdi1        |
| 0.00066394 | -0.5123668 | 0.197 | 0.218 | 1 | Monocytes | Cxcr6       |
| 0.00067524 | -0.3781202 | 0.229 | 0.242 | 1 | Monocytes | Ankrd12     |
| 0.00071697 | -0.352986  | 0.312 | 0.311 | 1 | Monocytes | Smarca5     |
| 0.00074754 | -0.3435906 | 0.165 | 0.184 | 1 | Monocytes | Pkp3        |
| 0.0007628  | -0.2933867 | 0.095 | 0.117 | 1 | Monocytes | Cdkn2aip    |

|            |            |       |       |             |             |
|------------|------------|-------|-------|-------------|-------------|
| 0.0007729  | -0.3109494 | 0.123 | 0.143 | 1 Monocytes | Nelfb       |
| 0.00078493 | -0.3822765 | 0.191 | 0.206 | 1 Monocytes | Phip        |
| 0.00078736 | -0.2901372 | 0.298 | 0.309 | 1 Monocytes | Ifi27       |
| 0.00080958 | -0.3179584 | 0.31  | 0.306 | 1 Monocytes | Mob4        |
| 0.00085869 | -0.2937852 | 0.136 | 0.155 | 1 Monocytes | Prkacb      |
| 0.00086034 | -0.4658827 | 0.271 | 0.274 | 1 Monocytes | Sik1        |
| 0.00096452 | -0.2606268 | 0.172 | 0.192 | 1 Monocytes | Dnajb9      |
| 0.00097825 | -0.2875405 | 0.094 | 0.115 | 1 Monocytes | Esy2        |
| 0.00098659 | -0.4614203 | 0.13  | 0.15  | 1 Monocytes | Nudt4       |
| 0.00100429 | -0.3218692 | 0.298 | 0.306 | 1 Monocytes | Tspan13     |
| 0.00102834 | -0.2707729 | 0.194 | 0.211 | 1 Monocytes | Rad21       |
| 0.00118513 | -0.3014832 | 0.13  | 0.149 | 1 Monocytes | Map4k1      |
| 0.00120389 | -0.3157902 | 0.181 | 0.196 | 1 Monocytes | Hnrnph3     |
| 0.00123204 | -0.3570722 | 0.184 | 0.2   | 1 Monocytes | Ccnt1       |
| 0.00123208 | -0.3558813 | 0.256 | 0.26  | 1 Monocytes | Srx2        |
| 0.00123895 | -0.3683327 | 0.572 | 0.568 | 1 Monocytes | Zfp36l2     |
| 0.00137701 | -0.3283078 | 0.129 | 0.149 | 1 Monocytes | Samd9l      |
| 0.00138463 | -0.2749179 | 0.083 | 0.104 | 1 Monocytes | Klrc1       |
| 0.00145872 | -0.3099889 | 0.125 | 0.143 | 1 Monocytes | Siah2       |
| 0.00146677 | -0.2793063 | 0.255 | 0.261 | 1 Monocytes | Wbp2        |
| 0.00146938 | -0.2698251 | 0.107 | 0.127 | 1 Monocytes | Cep57       |
| 0.00147678 | -0.2788442 | 0.135 | 0.154 | 1 Monocytes | Numa1       |
| 0.00149714 | -0.3291937 | 0.256 | 0.259 | 1 Monocytes | Anp32e      |
| 0.00152721 | -0.310515  | 0.393 | 0.372 | 1 Monocytes | Leprotl1    |
| 0.00166612 | -0.3206023 | 0.159 | 0.174 | 1 Monocytes | Pink1       |
| 0.00177538 | -0.2687089 | 0.184 | 0.142 | 1 Monocytes | Plk2        |
| 0.00181831 | -0.3109578 | 0.306 | 0.302 | 1 Monocytes | Dusp11      |
| 0.00184984 | -0.3655535 | 0.308 | 0.303 | 1 Monocytes | Rsrc2       |
| 0.00194804 | -0.3162285 | 0.131 | 0.149 | 1 Monocytes | 5430416N02l |
| 0.00200014 | -0.2644565 | 0.16  | 0.177 | 1 Monocytes | Cnot6l      |
| 0.0020097  | -0.3465602 | 0.149 | 0.167 | 1 Monocytes | Kmt2a       |
| 0.00209316 | -0.3799702 | 0.171 | 0.184 | 1 Monocytes | Senp6       |
| 0.00211644 | -0.259984  | 0.297 | 0.294 | 1 Monocytes | Bcas2       |
| 0.00223351 | -0.2778602 | 0.34  | 0.326 | 1 Monocytes | Cct7        |
| 0.00225402 | -0.4363848 | 0.233 | 0.238 | 1 Monocytes | Tgoln1      |
| 0.00252914 | -0.3279477 | 0.186 | 0.198 | 1 Monocytes | Chordc1     |
| 0.00261072 | -0.2892771 | 0.183 | 0.197 | 1 Monocytes | N4bp2l2     |
| 0.00267003 | -0.3849179 | 0.225 | 0.233 | 1 Monocytes | Epc1        |
| 0.00286952 | -0.3183    | 0.233 | 0.238 | 1 Monocytes | Ctbp1       |
| 0.0029155  | 0.42133397 | 0.852 | 0.845 | 1 Monocytes | mt-Nd4l     |
| 0.00295742 | -0.4238986 | 0.148 | 0.162 | 1 Monocytes | Ugcg        |
| 0.00322386 | -0.4319051 | 0.169 | 0.178 | 1 Monocytes | Srx9        |
| 0.0034723  | -0.2590898 | 0.48  | 0.446 | 1 Monocytes | Supt4a      |
| 0.00354708 | -0.3174937 | 0.237 | 0.248 | 1 Monocytes | Cyfip2      |
| 0.0036266  | -0.2606738 | 0.144 | 0.161 | 1 Monocytes | Gramd1a     |
| 0.003679   | -0.2802661 | 0.188 | 0.201 | 1 Monocytes | Cbx3        |
| 0.00385873 | -0.474245  | 0.11  | 0.128 | 1 Monocytes | Gzmk        |
| 0.00393003 | -0.3338669 | 0.2   | 0.211 | 1 Monocytes | Atf7ip      |



|            |            |       |       |           |              |         |
|------------|------------|-------|-------|-----------|--------------|---------|
| 0.00403613 | -0.2753566 | 0.129 | 0.146 | 1         | Monocytes    | Phf6    |
| 0.00427375 | -0.2674051 | 0.14  | 0.156 | 1         | Monocytes    | Alkbh1  |
| 0.00448526 | -0.3218203 | 0.709 | 0.712 | 1         | Monocytes    | Btg2    |
| 0.00468329 | -0.2812789 | 0.207 | 0.216 | 1         | Monocytes    | Srpk1   |
| 0.00514564 | -0.307676  | 0.093 | 0.11  | 1         | Monocytes    | Cxcr3   |
| 0.00538216 | -0.2775995 | 0.098 | 0.115 | 1         | Monocytes    | Gle1    |
| 0.00577924 | 0.38718899 | 0.755 | 0.714 | 1         | Monocytes    | mt-Nd4  |
| 0.00606323 | -0.3337428 | 0.264 | 0.263 | 1         | Monocytes    | Esyt1   |
| 0.00610203 | -0.2803845 | 0.276 | 0.273 | 1         | Monocytes    | Ptbp1   |
| 0.00646314 | -0.3478047 | 0.189 | 0.198 | 1         | Monocytes    | Prpf8   |
| 0.00653631 | -0.2592515 | 0.633 | 0.644 | 1         | Monocytes    | S100a10 |
| 0.00781749 | -0.2500972 | 0.19  | 0.201 | 1         | Monocytes    | Slc38a1 |
| 0.00787567 | -0.39702   | 0.117 | 0.134 | 1         | Monocytes    | Izumo1r |
| 0.00828701 | -0.2573164 | 0.204 | 0.211 | 1         | Monocytes    | Wdr33   |
| 0.00871261 | -0.3399812 | 0.224 | 0.228 | 1         | Monocytes    | Ddx50   |
| 0.0088309  | -0.3156291 | 0.168 | 0.18  | 1         | Monocytes    | Kdm5a   |
| 0.00936469 | -0.2587752 | 0.118 | 0.132 | 1         | Monocytes    | Nsmaf   |
| 0          | 6.24491028 | 0.982 | 0.108 | 0         | Granulocytes | S100a9  |
| 0          | 6.18062808 | 0.988 | 0.096 | 0         | Granulocytes | S100a8  |
| 0          | 5.99303311 | 0.908 | 0.039 | 0         | Granulocytes | Retnlg  |
| 0          | 5.03653457 | 0.785 | 0.049 | 0         | Granulocytes | G0s2    |
| 0          | 4.67665455 | 0.863 | 0.067 | 0         | Granulocytes | Il1r2   |
| 0          | 4.63867923 | 0.916 | 0.071 | 0         | Granulocytes | Slpi    |
| 0          | 4.48089125 | 0.971 | 0.222 | 0         | Granulocytes | Il1b    |
| 0          | 4.25224217 | 0.853 | 0.046 | 0         | Granulocytes | Hdc     |
| 0          | 4.15322207 | 0.836 | 0.074 | 0         | Granulocytes | Trem1   |
| 0          | 4.08316362 | 0.501 | 0.029 | 0         | Granulocytes | Lcn2    |
| 0          | 3.98413623 | 0.748 | 0.096 | 0         | Granulocytes | Tnfaip2 |
| 0          | 3.83417563 | 0.8   | 0.059 | 0         | Granulocytes | Csf3r   |
| 0          | 3.82225873 | 0.92  | 0.214 | 0         | Granulocytes | Ccl6    |
| 0          | 3.75654436 | 0.609 | 0.03  | 0         | Granulocytes | Wfdc21  |
| 0          | 3.74568098 | 0.978 | 0.286 | 0         | Granulocytes | Msrb1   |
| 0          | 3.73088987 | 0.708 | 0.036 | 0         | Granulocytes | Slc7a11 |
| 0          | 3.67938741 | 0.769 | 0.056 | 0         | Granulocytes | Clec4d  |
| 0          | 3.61031022 | 0.832 | 0.112 | 0         | Granulocytes | Hp      |
| 0          | 3.49598431 | 0.708 | 0.018 | 0         | Granulocytes | Mmp9    |
| 0          | 3.42938589 | 0.591 | 0.05  | 0         | Granulocytes | Hcar2   |
| 0          | 3.33764032 | 0.476 | 0.027 | 0         | Granulocytes | Lrg1    |
| 0          | 3.12287306 | 0.593 | 0.015 | 0         | Granulocytes | Cxcr2   |
| 0          | 3.06742997 | 0.352 | 0.012 | 0         | Granulocytes | Asprv1  |
| 0          | 3.00975849 | 0.307 | 0.01  | 0         | Granulocytes | Stfa211 |
| 0          | 2.70899441 | 0.47  | 0.018 | 0         | Granulocytes | H2-Q10  |
| 0          | 2.21329154 | 0.335 | 0.008 | 0         | Granulocytes | Il1f9   |
| 0          | 2.10652041 | 0.344 | 0.01  | 0         | Granulocytes | Dhrs9   |
| 0          | 1.85627231 | 0.299 | 0.005 | 0         | Granulocytes | Slc40a1 |
| 2.43E-304  | 2.77234848 | 0.935 | 0.264 | 3.44E-300 | Granulocytes | Alox5ap |
| 1.46E-298  | 2.68407273 | 0.998 | 0.401 | 2.07E-294 | Granulocytes | Tyrobp  |
| 7.39E-295  | 2.95108753 | 0.708 | 0.132 | 1.05E-290 | Granulocytes | Gsr     |

|           |            |       |       |           |                      |
|-----------|------------|-------|-------|-----------|----------------------|
| 6.21E-290 | 2.33716195 | 0.378 | 0.024 | 8.80E-286 | Granulocytes Arg2    |
| 6.96E-290 | 2.95461283 | 0.632 | 0.1   | 9.86E-286 | Granulocytes Adam8   |
| 1.52E-287 | 3.03085459 | 0.92  | 0.269 | 2.16E-283 | Granulocytes Ifitm2  |
| 5.50E-286 | 1.8204744  | 0.26  | 0.006 | 7.78E-282 | Granulocytes Chil1   |
| 2.48E-282 | 2.74171349 | 0.613 | 0.094 | 3.52E-278 | Granulocytes C5ar1   |
| 1.84E-277 | 3.22551999 | 0.849 | 0.268 | 2.61E-273 | Granulocytes Grina   |
| 1.38E-273 | 2.68511497 | 0.505 | 0.059 | 1.96E-269 | Granulocytes Ccr1    |
| 2.88E-271 | 3.34551653 | 0.524 | 0.064 | 4.07E-267 | Granulocytes Thbs1   |
| 6.44E-268 | 2.97228236 | 0.982 | 0.627 | 9.11E-264 | Granulocytes S100a11 |
| 1.25E-267 | 3.11045498 | 0.675 | 0.134 | 1.77E-263 | Granulocytes Slc16a3 |
| 1.92E-265 | 3.1758683  | 0.781 | 0.209 | 2.72E-261 | Granulocytes Lmnb1   |
| 2.96E-262 | 3.65984419 | 0.562 | 0.079 | 4.19E-258 | Granulocytes Ifitm1  |
| 1.29E-261 | 3.11446142 | 0.599 | 0.095 | 1.83E-257 | Granulocytes Clec4e  |
| 9.64E-258 | 2.48208501 | 0.479 | 0.055 | 1.36E-253 | Granulocytes Gcnt2   |
| 3.53E-253 | 3.03461356 | 0.826 | 0.26  | 5.00E-249 | Granulocytes Mxd1    |
| 3.79E-248 | 2.66274816 | 0.583 | 0.096 | 5.36E-244 | Granulocytes Cd300ld |
| 1.26E-246 | 4.12402421 | 0.689 | 0.147 | 1.79E-242 | Granulocytes Cxcl2   |
| 2.16E-244 | 2.25038712 | 0.996 | 0.921 | 3.06E-240 | Granulocytes Srgn    |
| 4.90E-243 | -3.1010987 | 0.323 | 0.971 | 6.94E-239 | Granulocytes Rpsa    |
| 1.80E-242 | 3.06060213 | 0.429 | 0.045 | 2.55E-238 | Granulocytes Ptgs2   |
| 6.95E-238 | 2.96945342 | 0.53  | 0.081 | 9.84E-234 | Granulocytes Nlrp3   |
| 6.45E-234 | 2.09945353 | 0.307 | 0.019 | 9.13E-230 | Granulocytes Mmp8    |
| 1.78E-232 | -2.650704  | 0.495 | 0.969 | 2.52E-228 | Granulocytes Rpl13   |
| 7.99E-232 | 3.18453165 | 0.953 | 0.544 | 1.13E-227 | Granulocytes Cebpb   |
| 8.29E-231 | 2.42171379 | 0.481 | 0.065 | 1.17E-226 | Granulocytes Mcemp1  |
| 2.52E-228 | -2.8361919 | 0.464 | 0.961 | 3.57E-224 | Granulocytes Eef1a1  |
| 1.77E-226 | -2.868355  | 0.321 | 0.952 | 2.50E-222 | Granulocytes Rps4x   |
| 6.64E-226 | -3.0286969 | 0.256 | 0.937 | 9.40E-222 | Granulocytes Rpl32   |
| 7.14E-226 | -2.8023346 | 0.297 | 0.951 | 1.01E-221 | Granulocytes Ppia    |
| 2.15E-224 | 2.6436954  | 0.673 | 0.155 | 3.04E-220 | Granulocytes Cd9     |
| 1.53E-223 | -2.4215748 | 0.564 | 0.968 | 2.17E-219 | Granulocytes Rps8    |
| 1.50E-220 | 2.4498961  | 0.92  | 0.51  | 2.12E-216 | Granulocytes Taldo1  |
| 2.18E-219 | -2.9083741 | 0.382 | 0.951 | 3.09E-215 | Granulocytes Rps15a  |
| 3.90E-218 | -2.5853965 | 0.403 | 0.958 | 5.52E-214 | Granulocytes Rps2    |
| 1.21E-217 | -2.4725351 | 0.464 | 0.954 | 1.71E-213 | Granulocytes Rpl19   |
| 1.55E-217 | -2.9216297 | 0.282 | 0.946 | 2.20E-213 | Granulocytes Rps20   |
| 1.66E-217 | 2.283595   | 0.297 | 0.02  | 2.35E-213 | Granulocytes Slfn4   |
| 3.64E-217 | -2.8788221 | 0.368 | 0.966 | 5.15E-213 | Granulocytes Tmsb10  |
| 2.63E-216 | -2.5164035 | 0.387 | 0.949 | 3.73E-212 | Granulocytes Rpl6    |
| 2.46E-215 | -2.5759369 | 0.595 | 0.964 | 3.48E-211 | Granulocytes Rps24   |
| 1.89E-214 | 2.89936005 | 0.72  | 0.205 | 2.68E-210 | Granulocytes Liltr4b |
| 2.50E-212 | 2.71847248 | 0.738 | 0.226 | 3.54E-208 | Granulocytes Ncf2    |
| 1.03E-211 | -2.622412  | 0.38  | 0.944 | 1.46E-207 | Granulocytes Rps5    |
| 1.82E-211 | -2.4246895 | 0.423 | 0.95  | 2.58E-207 | Granulocytes Rps11   |
| 1.05E-210 | -2.3319597 | 0.413 | 0.945 | 1.49E-206 | Granulocytes Rpl11   |
| 2.95E-210 | -2.4725567 | 0.493 | 0.96  | 4.17E-206 | Granulocytes Rplp0   |
| 2.41E-209 | 2.78520998 | 0.847 | 0.353 | 3.42E-205 | Granulocytes Pglyrp1 |
| 6.81E-209 | 1.3089993  | 0.168 | 0.002 | 9.64E-205 | Granulocytes Gm20406 |

|           |            |       |       |           |                       |
|-----------|------------|-------|-------|-----------|-----------------------|
| 5.53E-206 | 1.7820152  | 0.319 | 0.026 | 7.82E-202 | Granulocytes Trim30b  |
| 8.43E-206 | -2.3148066 | 0.546 | 0.956 | 1.19E-201 | Granulocytes Rps3a1   |
| 1.07E-205 | 2.71230403 | 0.448 | 0.063 | 1.51E-201 | Granulocytes Osm      |
| 3.33E-205 | -2.6584893 | 0.258 | 0.933 | 4.72E-201 | Granulocytes Ptma     |
| 6.65E-205 | -2.9096727 | 0.143 | 0.894 | 9.41E-201 | Granulocytes Rpl3     |
| 2.58E-204 | -2.5239376 | 0.37  | 0.937 | 3.65E-200 | Granulocytes Rps26    |
| 6.56E-203 | -2.8071625 | 0.274 | 0.939 | 9.28E-199 | Granulocytes Hsp90ab1 |
| 1.19E-200 | -2.0885448 | 0.683 | 0.962 | 1.69E-196 | Granulocytes Uba52    |
| 3.92E-200 | 1.78578169 | 0.327 | 0.029 | 5.55E-196 | Granulocytes Cd33     |
| 1.33E-199 | -2.8056075 | 0.145 | 0.898 | 1.89E-195 | Granulocytes Rpl10a   |
| 2.29E-199 | -2.0523787 | 0.501 | 0.98  | 3.25E-195 | Granulocytes mt-Co2   |
| 5.19E-198 | -2.3708784 | 0.462 | 0.938 | 7.35E-194 | Granulocytes Rplp1    |
| 5.28E-198 | 2.43679074 | 0.519 | 0.095 | 7.47E-194 | Granulocytes Gda      |
| 1.62E-197 | -2.4603746 | 0.425 | 0.937 | 2.29E-193 | Granulocytes Rps7     |
| 2.64E-196 | -2.5169337 | 0.337 | 0.922 | 3.73E-192 | Granulocytes Rpl13a   |
| 2.30E-195 | -2.7449689 | 0.231 | 0.91  | 3.26E-191 | Granulocytes Rps19    |
| 2.36E-194 | -2.2627879 | 0.411 | 0.936 | 3.34E-190 | Granulocytes Rpl8     |
| 1.36E-193 | -2.6063944 | 0.284 | 0.907 | 1.92E-189 | Granulocytes Rpl35    |
| 8.75E-193 | -2.0171006 | 0.499 | 0.98  | 1.24E-188 | Granulocytes mt-Co3   |
| 1.22E-192 | -2.4995558 | 0.331 | 0.908 | 1.73E-188 | Granulocytes Rpl36    |
| 1.64E-192 | -2.5817464 | 0.319 | 0.95  | 2.32E-188 | Granulocytes mt-Atp8  |
| 1.56E-191 | -2.8096676 | 0.164 | 0.877 | 2.22E-187 | Granulocytes Rps18    |
| 4.47E-191 | -2.1591851 | 0.489 | 0.935 | 6.33E-187 | Granulocytes Rps3     |
| 1.63E-190 | 1.61228963 | 0.198 | 0.007 | 2.31E-186 | Granulocytes Mrgpra2b |
| 1.39E-188 | -2.3798859 | 0.46  | 0.923 | 1.97E-184 | Granulocytes Rpl39    |
| 2.52E-188 | -1.9035332 | 0.677 | 0.982 | 3.57E-184 | Granulocytes mt-Co1   |
| 1.96E-187 | 2.15310711 | 0.405 | 0.055 | 2.78E-183 | Granulocytes Pygl     |
| 9.80E-187 | -2.3300632 | 0.454 | 0.92  | 1.39E-182 | Granulocytes Rpl21    |
| 7.14E-185 | -2.1548256 | 0.456 | 0.925 | 1.01E-180 | Granulocytes Rpl27a   |
| 7.66E-185 | 2.29196916 | 0.789 | 0.295 | 1.08E-180 | Granulocytes Spi1     |
| 9.47E-185 | -2.4641564 | 0.239 | 0.894 | 1.34E-180 | Granulocytes Rpl15    |
| 6.85E-184 | 1.25428104 | 0.184 | 0.006 | 9.70E-180 | Granulocytes Phospho1 |
| 5.70E-183 | -2.1038236 | 0.519 | 0.938 | 8.07E-179 | Granulocytes Rpl37a   |
| 5.95E-182 | 1.58530922 | 0.996 | 0.929 | 8.43E-178 | Granulocytes Ftl1     |
| 1.72E-181 | -2.0024146 | 0.556 | 0.932 | 2.44E-177 | Granulocytes Rpl34    |
| 3.19E-180 | -1.8729119 | 0.681 | 0.955 | 4.51E-176 | Granulocytes Rpl18a   |
| 6.81E-178 | 2.53609736 | 0.685 | 0.217 | 9.64E-174 | Granulocytes Ets2     |
| 1.11E-176 | 2.25067905 | 0.939 | 0.695 | 1.57E-172 | Granulocytes Btg2     |
| 4.21E-175 | -1.7345522 | 0.697 | 0.955 | 5.97E-171 | Granulocytes Rpl23    |
| 4.87E-175 | -2.1167359 | 0.476 | 0.916 | 6.89E-171 | Granulocytes Rps13    |
| 8.44E-174 | -1.8622811 | 0.566 | 0.946 | 1.19E-169 | Granulocytes Rpl18    |
| 2.18E-171 | -2.2212031 | 0.313 | 0.89  | 3.08E-167 | Granulocytes Rps23    |
| 4.04E-171 | -1.8374735 | 0.624 | 0.943 | 5.72E-167 | Granulocytes Rpl30    |
| 4.76E-171 | -2.0629758 | 0.417 | 0.915 | 6.74E-167 | Granulocytes Rpl28    |
| 5.03E-170 | -2.3501878 | 0.231 | 0.863 | 7.12E-166 | Granulocytes Rpl22    |
| 7.71E-170 | -2.3188604 | 0.217 | 0.869 | 1.09E-165 | Granulocytes Rpl14    |
| 1.08E-169 | -2.0940089 | 0.372 | 0.96  | 1.53E-165 | Granulocytes mt-Cytb  |
| 5.63E-169 | 1.40399234 | 0.194 | 0.009 | 7.97E-165 | Granulocytes Fpr1     |

|           |            |       |       |           |                        |
|-----------|------------|-------|-------|-----------|------------------------|
| 2.41E-168 | -2.1050698 | 0.339 | 0.9   | 3.41E-164 | Granulocytes Rpl29     |
| 4.19E-168 | -2.2570861 | 0.286 | 0.878 | 5.94E-164 | Granulocytes Rpl10-ps3 |
| 5.85E-168 | 1.61149587 | 0.284 | 0.026 | 8.28E-164 | Granulocytes Pi16      |
| 1.98E-167 | 2.32009622 | 0.706 | 0.227 | 2.80E-163 | Granulocytes Lst1      |
| 2.71E-166 | 2.13686148 | 0.47  | 0.09  | 3.84E-162 | Granulocytes Pilra     |
| 3.47E-166 | -1.6829169 | 0.751 | 0.955 | 4.91E-162 | Granulocytes Rps16     |
| 5.27E-166 | -1.9805304 | 0.397 | 0.911 | 7.46E-162 | Granulocytes Rps14     |
| 6.15E-166 | 2.32373113 | 0.71  | 0.246 | 8.70E-162 | Granulocytes Lilrb4a   |
| 8.56E-166 | 1.49759922 | 0.996 | 0.936 | 1.21E-161 | Granulocytes Actg1     |
| 2.81E-165 | 2.16347682 | 0.456 | 0.083 | 3.97E-161 | Granulocytes Cd300lf   |
| 4.26E-165 | -2.0902626 | 0.339 | 0.888 | 6.03E-161 | Granulocytes Rpl26     |
| 1.50E-164 | -1.7760282 | 0.634 | 0.935 | 2.12E-160 | Granulocytes Rps10     |
| 6.41E-164 | -2.1837925 | 0.292 | 0.875 | 9.07E-160 | Granulocytes Rpl7      |
| 1.96E-162 | -2.465964  | 0.225 | 0.891 | 2.78E-158 | Granulocytes mt-Nd4l   |
| 3.50E-162 | 1.40806768 | 0.998 | 0.983 | 4.95E-158 | Granulocytes Malat1    |
| 4.18E-162 | -2.663185  | 0.112 | 0.802 | 5.91E-158 | Granulocytes Rpl12     |
| 8.67E-161 | -1.7049246 | 0.644 | 0.937 | 1.23E-156 | Granulocytes Rpl9-ps6  |
| 1.03E-160 | 2.54120171 | 0.579 | 0.155 | 1.45E-156 | Granulocytes Trib1     |
| 2.07E-160 | 2.07016395 | 0.413 | 0.07  | 2.93E-156 | Granulocytes Sirpb1b   |
| 2.77E-160 | 2.15879079 | 0.855 | 0.502 | 3.92E-156 | Granulocytes Litaf     |
| 1.52E-159 | -1.9598314 | 0.519 | 0.921 | 2.16E-155 | Granulocytes Rps21     |
| 1.52E-158 | 1.72264572 | 0.235 | 0.018 | 2.16E-154 | Granulocytes Ankrd33b  |
| 1.04E-157 | -2.0193194 | 0.47  | 0.908 | 1.47E-153 | Granulocytes Rpl38     |
| 2.39E-156 | 1.89447014 | 0.965 | 0.589 | 3.38E-152 | Granulocytes S100a6    |
| 2.54E-156 | -1.8783749 | 0.384 | 0.906 | 3.60E-152 | Granulocytes Rpl24     |
| 4.88E-156 | -2.1211586 | 0.262 | 0.908 | 6.91E-152 | Granulocytes mt-Nd1    |
| 8.03E-156 | 1.89508859 | 0.99  | 0.955 | 1.14E-151 | Granulocytes Fth1      |
| 5.45E-155 | 2.35001745 | 0.665 | 0.231 | 7.72E-151 | Granulocytes Tpd52     |
| 1.54E-153 | -2.3968578 | 0.35  | 0.873 | 2.18E-149 | Granulocytes Rps28     |
| 1.95E-153 | -1.8828163 | 0.376 | 0.894 | 2.76E-149 | Granulocytes Rpl27     |
| 3.45E-152 | -1.4587406 | 0.808 | 0.958 | 4.89E-148 | Granulocytes Gm10076   |
| 3.55E-151 | -2.2783453 | 0.172 | 0.833 | 5.02E-147 | Granulocytes Rpl36a    |
| 1.39E-150 | 2.40382806 | 0.401 | 0.07  | 1.97E-146 | Granulocytes Sh2d3c    |
| 2.36E-150 | -1.8527961 | 0.325 | 0.922 | 3.35E-146 | Granulocytes mt-Atp6   |
| 6.61E-150 | -1.7445503 | 0.452 | 0.909 | 9.36E-146 | Granulocytes Rplp2     |
| 6.34E-149 | -1.9997825 | 0.272 | 0.864 | 8.98E-145 | Granulocytes Rpl7a     |
| 1.38E-148 | -2.2123682 | 0.123 | 0.799 | 1.96E-144 | Granulocytes Rpl36al   |
| 8.92E-147 | 1.68842365 | 0.303 | 0.037 | 1.26E-142 | Granulocytes Trem3     |
| 1.52E-146 | 1.51397225 | 0.965 | 0.72  | 2.15E-142 | Granulocytes Fxyd5     |
| 6.56E-146 | 1.24702146 | 0.176 | 0.009 | 9.29E-142 | Granulocytes Sgms2     |
| 5.85E-143 | 2.32320136 | 0.599 | 0.193 | 8.28E-139 | Granulocytes Ndel1     |
| 5.86E-143 | -2.1814498 | 0.151 | 0.797 | 8.29E-139 | Granulocytes Rpl5      |
| 3.86E-141 | -1.7028024 | 0.517 | 0.944 | 5.46E-137 | Granulocytes H2-K1     |
| 1.13E-140 | -2.7455433 | 0.102 | 0.764 | 1.59E-136 | Granulocytes Crip1     |
| 5.28E-137 | -1.9393982 | 0.231 | 0.838 | 7.48E-133 | Granulocytes Naca      |
| 1.10E-136 | -1.8767323 | 0.476 | 0.895 | 1.56E-132 | Granulocytes Rpl35a    |
| 2.72E-136 | 2.26378567 | 0.675 | 0.267 | 3.85E-132 | Granulocytes Cd44      |
| 7.14E-136 | -2.0265089 | 0.227 | 0.818 | 1.01E-131 | Granulocytes Rps6      |

|           |            |       |       |           |                          |
|-----------|------------|-------|-------|-----------|--------------------------|
| 8.82E-136 | 1.00430292 | 0.129 | 0.004 | 1.25E-131 | Granulocytes Nlrp12      |
| 2.82E-135 | 0.95040387 | 0.121 | 0.003 | 3.99E-131 | Granulocytes 9830107B12I |
| 4.71E-134 | 1.52862383 | 0.147 | 0.006 | 6.67E-130 | Granulocytes Ly6g        |
| 1.85E-132 | -1.8869921 | 0.233 | 0.865 | 2.63E-128 | Granulocytes mt-Nd2      |
| 2.49E-132 | -2.176306  | 0.223 | 0.81  | 3.53E-128 | Granulocytes Eef2        |
| 2.26E-130 | 1.91242667 | 0.344 | 0.056 | 3.20E-126 | Granulocytes Slc2a3      |
| 1.55E-129 | 1.09710288 | 0.117 | 0.003 | 2.19E-125 | Granulocytes Chac1       |
| 2.14E-129 | 1.91886323 | 0.546 | 0.151 | 3.03E-125 | Granulocytes Pla2g7      |
| 1.47E-128 | 1.42569026 | 0.213 | 0.019 | 2.08E-124 | Granulocytes Igf1r       |
| 1.73E-128 | -2.1574367 | 0.088 | 0.718 | 2.45E-124 | Granulocytes Npm1        |
| 1.75E-128 | 1.76044892 | 0.268 | 0.033 | 2.48E-124 | Granulocytes Cass4       |
| 1.01E-127 | -2.0595627 | 0.571 | 0.912 | 1.43E-123 | Granulocytes Rps29       |
| 2.43E-127 | 1.29272077 | 0.953 | 0.388 | 3.44E-123 | Granulocytes Fcer1g      |
| 2.82E-126 | -2.1024114 | 0.123 | 0.736 | 3.99E-122 | Granulocytes Rpl4        |
| 2.64E-125 | -1.730936  | 0.499 | 0.884 | 3.73E-121 | Granulocytes Rpl17       |
| 7.61E-124 | -1.921555  | 0.442 | 0.904 | 1.08E-119 | Granulocytes Hspa8       |
| 1.90E-123 | -1.6130005 | 0.474 | 0.886 | 2.69E-119 | Granulocytes Rps12       |
| 1.32E-122 | -1.8351124 | 0.227 | 0.801 | 1.87E-118 | Granulocytes Eif3f       |
| 5.67E-121 | -2.4719725 | 0.078 | 0.687 | 8.02E-117 | Granulocytes Hspe1       |
| 5.00E-119 | -2.4716345 | 0.078 | 0.681 | 7.08E-115 | Granulocytes S100a10     |
| 1.75E-118 | 2.33735958 | 0.497 | 0.141 | 2.47E-114 | Granulocytes Anxa1       |
| 3.17E-118 | 1.21747573 | 0.184 | 0.015 | 4.48E-114 | Granulocytes Padi4       |
| 8.67E-117 | 2.26043819 | 0.863 | 0.607 | 1.23E-112 | Granulocytes Dusp1       |
| 1.96E-116 | 1.54906123 | 0.239 | 0.028 | 2.77E-112 | Granulocytes Cd300lb     |
| 4.43E-116 | -2.0071199 | 0.108 | 0.698 | 6.26E-112 | Granulocytes Atp5g2      |
| 4.49E-116 | 2.42204502 | 0.507 | 0.156 | 6.35E-112 | Granulocytes Rnf149      |
| 2.67E-115 | -2.1819779 | 0.08  | 0.675 | 3.78E-111 | Granulocytes Nme2        |
| 5.21E-113 | 2.02694281 | 0.454 | 0.123 | 7.37E-109 | Granulocytes Nudt4       |
| 1.54E-112 | 2.04614381 | 0.401 | 0.094 | 2.19E-108 | Granulocytes Slc15a3     |
| 3.94E-112 | -1.7305882 | 0.198 | 0.775 | 5.58E-108 | Granulocytes Rps15       |
| 5.28E-112 | -1.1293896 | 0.843 | 0.959 | 7.48E-108 | Granulocytes Tpt1        |
| 3.29E-110 | 2.41998599 | 0.515 | 0.169 | 4.65E-106 | Granulocytes Plk3        |
| 3.46E-110 | 2.01532937 | 0.716 | 0.4   | 4.89E-106 | Granulocytes Mrpl33      |
| 2.43E-109 | -1.989918  | 0.151 | 0.731 | 3.44E-105 | Granulocytes mt-Nd5      |
| 3.06E-109 | -2.0070656 | 0.078 | 0.654 | 4.34E-105 | Granulocytes Il2rg       |
| 9.93E-108 | 1.58829323 | 0.274 | 0.042 | 1.41E-103 | Granulocytes Gm5150      |
| 1.10E-107 | 2.72229708 | 0.618 | 0.25  | 1.55E-103 | Granulocytes Plaur       |
| 2.46E-107 | 1.80938705 | 0.245 | 0.033 | 3.49E-103 | Granulocytes Rdh12       |
| 6.17E-107 | 2.14209219 | 0.656 | 0.327 | 8.73E-103 | Granulocytes Adipor1     |
| 1.34E-106 | 1.98004138 | 0.751 | 0.449 | 1.89E-102 | Granulocytes Mcl1        |
| 1.49E-105 | -1.8720458 | 0.137 | 0.694 | 2.11E-101 | Granulocytes Atp5g3      |
| 2.85E-105 | 1.88817807 | 0.413 | 0.106 | 4.03E-101 | Granulocytes Nfam1       |
| 4.50E-105 | 0.81657896 | 0.104 | 0.003 | 6.37E-101 | Granulocytes Ceacam10    |
| 2.39E-104 | 2.012456   | 0.552 | 0.202 | 3.38E-100 | Granulocytes Tnfrsf1a    |
| 2.50E-104 | 1.95121767 | 0.446 | 0.128 | 3.54E-100 | Granulocytes 2310001H17I |
| 3.25E-104 | 1.32025875 | 0.172 | 0.015 | 4.60E-100 | Granulocytes A530064D06I |
| 2.71E-103 | -1.9868741 | 0.082 | 0.64  | 3.84E-99  | Granulocytes Prdx1       |
| 5.98E-103 | 2.11677291 | 0.358 | 0.077 | 8.47E-99  | Granulocytes Il1rn       |

|           |            |       |       |          |                         |
|-----------|------------|-------|-------|----------|-------------------------|
| 1.44E-102 | 2.02075373 | 0.542 | 0.197 | 2.03E-98 | Granulocytes Sorl1      |
| 1.49E-102 | -1.7882555 | 0.143 | 0.709 | 2.11E-98 | Granulocytes Rpl22l1    |
| 1.47E-101 | -1.8066019 | 0.119 | 0.668 | 2.09E-97 | Granulocytes Eif3h      |
| 1.60E-101 | -1.5745277 | 0.26  | 0.797 | 2.26E-97 | Granulocytes Eef1b2     |
| 4.45E-101 | -1.7421879 | 0.233 | 0.764 | 6.31E-97 | Granulocytes Shisa5     |
| 3.99E-100 | 1.40208546 | 0.239 | 0.034 | 5.65E-96 | Granulocytes Siglece    |
| 5.15E-100 | 1.66257379 | 0.767 | 0.436 | 7.29E-96 | Granulocytes Anxa2      |
| 1.37E-98  | 0.85304157 | 0.117 | 0.006 | 1.94E-94 | Granulocytes Rab44      |
| 5.84E-98  | -2.1862444 | 0.065 | 0.604 | 8.26E-94 | Granulocytes H2-Q7      |
| 1.13E-97  | 1.56819003 | 0.252 | 0.039 | 1.60E-93 | Granulocytes 1600010M07 |
| 1.73E-97  | 1.51128895 | 0.834 | 0.661 | 2.44E-93 | Granulocytes Gabarap    |
| 5.55E-97  | -1.6471943 | 0.123 | 0.673 | 7.85E-93 | Granulocytes Rps17      |
| 3.51E-96  | 1.57666634 | 0.89  | 0.632 | 4.97E-92 | Granulocytes Fos        |
| 2.38E-94  | -3.4041605 | 0.098 | 0.6   | 3.36E-90 | Granulocytes AW112010   |
| 7.14E-94  | -1.6581607 | 0.131 | 0.667 | 1.01E-89 | Granulocytes Rpl31      |
| 9.56E-94  | -1.8062221 | 0.061 | 0.581 | 1.35E-89 | Granulocytes Dad1       |
| 9.70E-94  | 2.26301991 | 0.501 | 0.167 | 1.37E-89 | Granulocytes Cd14       |
| 1.30E-93  | -1.6180087 | 0.115 | 0.653 | 1.84E-89 | Granulocytes Nsa2       |
| 3.08E-93  | 0.91256868 | 0.108 | 0.005 | 4.36E-89 | Granulocytes Ptgs2os2   |
| 1.22E-92  | 1.69832521 | 0.734 | 0.443 | 1.73E-88 | Granulocytes Txn1       |
| 2.41E-92  | -1.9029743 | 0.245 | 0.76  | 3.41E-88 | Granulocytes Hsp90aa1   |
| 7.82E-92  | 1.29280106 | 0.192 | 0.023 | 1.11E-87 | Granulocytes Scnn1a     |
| 4.40E-90  | -2.2168657 | 0.055 | 0.561 | 6.23E-86 | Granulocytes Ptprcap    |
| 6.69E-90  | -1.5096768 | 0.434 | 0.853 | 9.47E-86 | Granulocytes Ly6e       |
| 2.37E-89  | -1.5657771 | 0.168 | 0.692 | 3.36E-85 | Granulocytes Rpl23a     |
| 4.07E-89  | -1.3785777 | 0.307 | 0.801 | 5.76E-85 | Granulocytes Btf3       |
| 3.93E-88  | -2.944528  | 0.067 | 0.558 | 5.57E-84 | Granulocytes Lgals1     |
| 7.02E-88  | 1.0813677  | 0.151 | 0.014 | 9.94E-84 | Granulocytes Pbx1       |
| 8.24E-88  | 0.91884427 | 0.123 | 0.008 | 1.17E-83 | Granulocytes Acta2      |
| 2.27E-87  | 0.82886903 | 0.982 | 0.942 | 3.22E-83 | Granulocytes Eif1       |
| 1.13E-86  | -1.8351939 | 0.09  | 0.603 | 1.60E-82 | Granulocytes Hsp90b1    |
| 2.34E-86  | -1.6829622 | 0.09  | 0.597 | 3.32E-82 | Granulocytes Hint1      |
| 1.11E-85  | -1.5559536 | 0.1   | 0.613 | 1.57E-81 | Granulocytes Snrpg      |
| 1.51E-85  | -1.4974211 | 0.164 | 0.677 | 2.14E-81 | Granulocytes Sumo2      |
| 3.97E-85  | -1.9387214 | 0.094 | 0.592 | 5.62E-81 | Granulocytes Xist       |
| 1.04E-84  | -1.6015608 | 0.094 | 0.595 | 1.48E-80 | Granulocytes Eef1d      |
| 2.41E-84  | 1.71397664 | 0.294 | 0.064 | 3.41E-80 | Granulocytes Smox       |
| 4.05E-84  | 1.72660613 | 0.656 | 0.357 | 5.74E-80 | Granulocytes Zyx        |
| 7.85E-84  | -1.4673492 | 0.184 | 0.691 | 1.11E-79 | Granulocytes Ybx1       |
| 9.14E-83  | -1.5090085 | 0.082 | 0.578 | 1.29E-78 | Granulocytes Serbp1     |
| 1.85E-82  | -1.5080964 | 0.73  | 0.917 | 2.62E-78 | Granulocytes Rps27      |
| 5.69E-82  | -2.0459317 | 0.033 | 0.508 | 8.06E-78 | Granulocytes Cd2        |
| 9.88E-82  | 1.71207849 | 0.509 | 0.197 | 1.40E-77 | Granulocytes Cyp4f18    |
| 1.22E-80  | -1.5109104 | 0.065 | 0.557 | 1.73E-76 | Granulocytes Snrpe      |
| 1.80E-80  | -0.9222009 | 0.814 | 0.937 | 2.54E-76 | Granulocytes Rpl37      |
| 1.93E-80  | -1.1808573 | 0.419 | 0.844 | 2.73E-76 | Granulocytes Rpl41      |
| 1.95E-80  | 0.90940686 | 0.115 | 0.008 | 2.76E-76 | Granulocytes Tlr6       |
| 2.91E-80  | -1.6655614 | 0.082 | 0.566 | 4.12E-76 | Granulocytes Ran        |

|          |            |       |       |          |                       |
|----------|------------|-------|-------|----------|-----------------------|
| 1.29E-79 | 0.94415991 | 0.129 | 0.011 | 1.82E-75 | Granulocytes Gm43661  |
| 2.44E-79 | 2.07633123 | 0.387 | 0.116 | 3.46E-75 | Granulocytes Tgm2     |
| 2.61E-79 | -3.5195669 | 0.088 | 0.54  | 3.70E-75 | Granulocytes H2-Aa    |
| 5.17E-79 | -2.4518094 | 0.11  | 0.587 | 7.32E-75 | Granulocytes Ctss     |
| 1.29E-78 | 1.55663745 | 0.346 | 0.092 | 1.82E-74 | Granulocytes Emilin2  |
| 3.39E-78 | 1.71120035 | 0.444 | 0.158 | 4.80E-74 | Granulocytes Themis2  |
| 3.64E-78 | -3.6124861 | 0.282 | 0.67  | 5.16E-74 | Granulocytes Cd74     |
| 7.07E-78 | 1.4441394  | 0.941 | 0.872 | 1.00E-73 | Granulocytes Junb     |
| 9.03E-78 | 1.12811476 | 0.157 | 0.018 | 1.28E-73 | Granulocytes Lilra6   |
| 1.09E-77 | 1.7866034  | 0.356 | 0.101 | 1.55E-73 | Granulocytes Csf2rb   |
| 3.81E-77 | 1.6090896  | 0.294 | 0.069 | 5.40E-73 | Granulocytes Hacd4    |
| 6.78E-77 | 1.85849952 | 0.38  | 0.113 | 9.59E-73 | Granulocytes Mgst1    |
| 9.36E-77 | -3.3218676 | 0.08  | 0.524 | 1.32E-72 | Granulocytes H2-Ab1   |
| 1.57E-76 | 1.2845056  | 0.834 | 0.699 | 2.22E-72 | Granulocytes Lsp1     |
| 4.11E-76 | -1.4134193 | 0.168 | 0.657 | 5.82E-72 | Granulocytes Ppib     |
| 4.25E-76 | 1.44559014 | 0.734 | 0.465 | 6.02E-72 | Granulocytes Prdx5    |
| 6.44E-76 | 1.99208184 | 0.556 | 0.235 | 9.11E-72 | Granulocytes Ier3     |
| 6.88E-76 | -1.2723929 | 0.331 | 0.785 | 9.74E-72 | Granulocytes Rpl9     |
| 8.51E-76 | 1.18556363 | 0.83  | 0.679 | 1.20E-71 | Granulocytes Lcp1     |
| 1.49E-75 | 1.55362768 | 0.245 | 0.048 | 2.11E-71 | Granulocytes Ptafr    |
| 6.47E-75 | -2.8465074 | 0.037 | 0.481 | 9.15E-71 | Granulocytes Ms4a4b   |
| 9.89E-75 | 0.96286774 | 0.141 | 0.015 | 1.40E-70 | Granulocytes Alox5    |
| 1.38E-74 | -1.4849499 | 0.059 | 0.518 | 1.96E-70 | Granulocytes Eef1g    |
| 2.83E-74 | 1.65942882 | 0.264 | 0.057 | 4.01E-70 | Granulocytes Slc25a33 |
| 3.38E-74 | -1.5001706 | 0.137 | 0.609 | 4.78E-70 | Granulocytes Hnrnpa3  |
| 5.53E-74 | -3.1785362 | 0.102 | 0.533 | 7.82E-70 | Granulocytes H2-Eb1   |
| 1.89E-73 | -1.3517352 | 0.211 | 0.692 | 2.68E-69 | Granulocytes Psme1    |
| 1.12E-72 | -1.5439409 | 0.031 | 0.465 | 1.59E-68 | Granulocytes Snrpf    |
| 1.37E-72 | -1.9171244 | 0.051 | 0.496 | 1.93E-68 | Granulocytes Ets1     |
| 2.23E-72 | -2.0006708 | 0.035 | 0.474 | 3.16E-68 | Granulocytes Hspd1    |
| 2.29E-72 | 1.02698779 | 0.149 | 0.017 | 3.24E-68 | Granulocytes Fpr2     |
| 3.36E-72 | 1.64699116 | 0.329 | 0.09  | 4.76E-68 | Granulocytes Ccpg1    |
| 1.19E-71 | 2.09402485 | 0.501 | 0.213 | 1.68E-67 | Granulocytes Nfkbiz   |
| 2.73E-71 | -1.6514787 | 0.182 | 0.631 | 3.86E-67 | Granulocytes Npc2     |
| 2.85E-71 | -2.691319  | 0.053 | 0.488 | 4.03E-67 | Granulocytes Ly6a     |
| 2.86E-71 | -1.3097892 | 0.264 | 0.726 | 4.05E-67 | Granulocytes Psmb8    |
| 3.84E-71 | 1.016514   | 0.135 | 0.014 | 5.43E-67 | Granulocytes F5       |
| 4.29E-71 | 0.77203703 | 0.102 | 0.007 | 6.08E-67 | Granulocytes Bmx      |
| 4.65E-71 | 1.52956326 | 0.734 | 0.573 | 6.58E-67 | Granulocytes Map1lc3b |
| 3.61E-70 | 1.67147639 | 0.436 | 0.162 | 5.11E-66 | Granulocytes Pirb     |
| 4.13E-70 | 1.63565248 | 0.297 | 0.076 | 5.84E-66 | Granulocytes Rabgef1  |
| 9.57E-70 | -1.2395499 | 0.186 | 0.666 | 1.36E-65 | Granulocytes Cnbp     |
| 1.23E-69 | 1.57763097 | 0.358 | 0.109 | 1.74E-65 | Granulocytes Fgr      |
| 2.61E-69 | 1.15100667 | 0.17  | 0.024 | 3.69E-65 | Granulocytes Trpm2    |
| 6.42E-69 | -3.6251759 | 0.086 | 0.49  | 9.09E-65 | Granulocytes Nkg7     |
| 1.15E-68 | -1.515106  | 0.041 | 0.467 | 1.63E-64 | Granulocytes Krtcap2  |
| 1.87E-68 | -1.1735009 | 0.254 | 0.72  | 2.64E-64 | Granulocytes Rps25    |
| 5.28E-68 | 1.49259065 | 0.254 | 0.057 | 7.47E-64 | Granulocytes Rasgrp4  |

|          |            |       |       |          |                        |
|----------|------------|-------|-------|----------|------------------------|
| 1.22E-67 | -1.1961181 | 0.174 | 0.64  | 1.73E-63 | Granulocytes Sec61g    |
| 1.23E-67 | -1.4370057 | 0.086 | 0.52  | 1.74E-63 | Granulocytes Uqcrb     |
| 2.66E-67 | -1.4638615 | 0.053 | 0.479 | 3.76E-63 | Granulocytes Erh       |
| 8.42E-67 | -2.6394285 | 0.025 | 0.435 | 1.19E-62 | Granulocytes Cd3e      |
| 1.13E-66 | 1.76889582 | 0.796 | 0.604 | 1.60E-62 | Granulocytes Zfp36     |
| 1.56E-66 | -1.4309982 | 0.049 | 0.474 | 2.21E-62 | Granulocytes Eif3i     |
| 1.99E-66 | -1.2601548 | 0.196 | 0.658 | 2.82E-62 | Granulocytes Atp5d     |
| 6.89E-66 | -1.1450736 | 0.297 | 0.756 | 9.76E-62 | Granulocytes mt-Nd4    |
| 9.24E-66 | -1.3756603 | 0.088 | 0.526 | 1.31E-61 | Granulocytes Gstp1     |
| 9.61E-66 | 0.81709189 | 0.117 | 0.011 | 1.36E-61 | Granulocytes Pram1     |
| 1.65E-65 | -1.3683836 | 0.051 | 0.477 | 2.33E-61 | Granulocytes Nol7      |
| 2.74E-65 | 0.6215876  | 0.998 | 0.982 | 3.87E-61 | Granulocytes Tmsb4x    |
| 6.18E-65 | 0.86005404 | 0.108 | 0.009 | 8.75E-61 | Granulocytes Tacstd2   |
| 7.23E-65 | 1.55469463 | 0.268 | 0.066 | 1.02E-60 | Granulocytes Rab11fip1 |
| 8.10E-65 | -2.7971375 | 0.063 | 0.465 | 1.15E-60 | Granulocytes Cd3g      |
| 8.25E-65 | -2.405999  | 0.104 | 0.522 | 1.17E-60 | Granulocytes Hspa1b    |
| 9.19E-65 | -1.5530984 | 0.016 | 0.417 | 1.30E-60 | Granulocytes Cd48      |
| 1.74E-64 | -1.6575904 | 0.047 | 0.465 | 2.46E-60 | Granulocytes Tuba1b    |
| 2.29E-64 | -1.4042563 | 0.1   | 0.537 | 3.25E-60 | Granulocytes Mbnl1     |
| 4.77E-64 | 1.75335719 | 0.658 | 0.449 | 6.75E-60 | Granulocytes Pim1      |
| 1.08E-63 | 1.53707804 | 0.292 | 0.08  | 1.53E-59 | Granulocytes Abtb1     |
| 1.42E-63 | -1.8898264 | 0.035 | 0.438 | 2.01E-59 | Granulocytes Gimap6    |
| 1.74E-63 | 1.63901823 | 0.266 | 0.066 | 2.47E-59 | Granulocytes Stx11     |
| 2.16E-63 | -1.0857568 | 0.219 | 0.688 | 3.06E-59 | Granulocytes Dynll1    |
| 2.72E-63 | -4.1241462 | 0.235 | 0.578 | 3.86E-59 | Granulocytes Ccl5      |
| 3.55E-63 | -1.060583  | 0.249 | 0.715 | 5.03E-59 | Granulocytes Cox7c     |
| 4.98E-63 | -1.2870446 | 0.061 | 0.479 | 7.06E-59 | Granulocytes Nop10     |
| 5.54E-63 | -1.4276533 | 0.17  | 0.602 | 7.84E-59 | Granulocytes Psme2     |
| 6.65E-63 | -1.3437681 | 0.033 | 0.436 | 9.41E-59 | Granulocytes Eif3e     |
| 9.44E-63 | -1.4932291 | 0.086 | 0.516 | 1.34E-58 | Granulocytes Mif       |
| 1.37E-62 | 1.32184876 | 0.73  | 0.582 | 1.94E-58 | Granulocytes Gmfg      |
| 1.58E-62 | -1.3620095 | 0.049 | 0.453 | 2.24E-58 | Granulocytes Hnrnpa1   |
| 1.75E-62 | -1.5758557 | 0.157 | 0.589 | 2.48E-58 | Granulocytes Zfp36l1   |
| 1.79E-62 | 1.62942837 | 0.632 | 0.383 | 2.53E-58 | Granulocytes Neat1     |
| 4.51E-62 | -1.2532812 | 0.084 | 0.5   | 6.38E-58 | Granulocytes Atp5a1    |
| 7.10E-62 | -1.2673092 | 0.119 | 0.549 | 1.01E-57 | Granulocytes Snrpb     |
| 2.09E-61 | 1.6603954  | 0.358 | 0.122 | 2.96E-57 | Granulocytes Slfn1     |
| 2.39E-61 | -1.4267649 | 0.02  | 0.41  | 3.38E-57 | Granulocytes Fkbp1a    |
| 2.49E-61 | -1.5518061 | 0.039 | 0.438 | 3.53E-57 | Granulocytes Tubb5     |
| 3.89E-61 | 0.78137931 | 0.669 | 0.293 | 5.51E-57 | Granulocytes Ifitm3    |
| 5.87E-61 | 1.30902497 | 0.231 | 0.051 | 8.31E-57 | Granulocytes Pilrb2    |
| 7.95E-61 | -1.1780688 | 0.256 | 0.704 | 1.13E-56 | Granulocytes Hmgb1     |
| 1.36E-60 | -1.1289473 | 0.339 | 0.749 | 1.92E-56 | Granulocytes Rbm3      |
| 2.84E-60 | 1.03291282 | 0.141 | 0.019 | 4.02E-56 | Granulocytes Il1rap    |
| 3.50E-60 | 1.78655195 | 0.419 | 0.175 | 4.95E-56 | Granulocytes Dhrr7     |
| 4.52E-60 | 2.20409936 | 0.524 | 0.267 | 6.40E-56 | Granulocytes Egr1      |
| 4.61E-60 | -1.537986  | 0.037 | 0.433 | 6.53E-56 | Granulocytes H2-Q6     |
| 6.40E-60 | 1.72246568 | 0.54  | 0.298 | 9.07E-56 | Granulocytes Snx20     |



|          |            |       |       |          |              |             |
|----------|------------|-------|-------|----------|--------------|-------------|
| 1.06E-59 | -1.5376865 | 0.057 | 0.45  | 1.50E-55 | Granulocytes | 1-Sep       |
| 1.64E-59 | -1.2991945 | 0.063 | 0.468 | 2.32E-55 | Granulocytes | Mrpl52      |
| 3.97E-59 | -1.2042188 | 0.149 | 0.576 | 5.62E-55 | Granulocytes | Ndufa4      |
| 5.21E-59 | 0.98911769 | 0.131 | 0.016 | 7.38E-55 | Granulocytes | F630028O10I |
| 5.27E-59 | -1.7321036 | 0.043 | 0.435 | 7.46E-55 | Granulocytes | Ahnak       |
| 5.50E-59 | 1.47972451 | 0.675 | 0.505 | 7.79E-55 | Granulocytes | Rhog        |
| 6.38E-59 | 1.27290193 | 0.495 | 0.209 | 9.03E-55 | Granulocytes | Fcgr3       |
| 9.20E-59 | -2.7565272 | 0.094 | 0.49  | 1.30E-54 | Granulocytes | Hspa1a      |
| 1.14E-58 | -1.3213047 | 0.041 | 0.426 | 1.61E-54 | Granulocytes | Mdh1        |
| 1.50E-58 | -1.0761241 | 0.307 | 0.728 | 2.12E-54 | Granulocytes | Uqcrh       |
| 1.55E-58 | -0.6982716 | 0.861 | 0.939 | 2.19E-54 | Granulocytes | Rps27a      |
| 2.84E-58 | -1.1572757 | 0.188 | 0.624 | 4.02E-54 | Granulocytes | Gnas        |
| 2.90E-58 | 0.9850172  | 0.139 | 0.019 | 4.10E-54 | Granulocytes | Dmxl2       |
| 4.64E-58 | -1.1047332 | 0.194 | 0.631 | 6.57E-54 | Granulocytes | Eif3k       |
| 6.04E-58 | -2.2838728 | 0.055 | 0.432 | 8.55E-54 | Granulocytes | Cd3d        |
| 8.73E-58 | -1.1892785 | 0.18  | 0.605 | 1.24E-53 | Granulocytes | Cox5a       |
| 1.05E-57 | 1.98121606 | 0.663 | 0.492 | 1.48E-53 | Granulocytes | Cdk2ap2     |
| 1.58E-57 | -1.8760201 | 0.061 | 0.45  | 2.24E-53 | Granulocytes | Nr4a2       |
| 1.72E-57 | -1.5857239 | 0.033 | 0.407 | 2.43E-53 | Granulocytes | Snx5        |
| 2.16E-57 | -1.198765  | 0.125 | 0.543 | 3.06E-53 | Granulocytes | Ncl         |
| 4.28E-57 | 1.6108477  | 0.446 | 0.199 | 6.06E-53 | Granulocytes | Ninj1       |
| 6.28E-57 | -1.0406892 | 0.258 | 0.693 | 8.89E-53 | Granulocytes | Rpl10       |
| 7.45E-57 | 1.7490939  | 0.577 | 0.305 | 1.05E-52 | Granulocytes | Atf3        |
| 1.04E-56 | -1.1964883 | 0.125 | 0.54  | 1.47E-52 | Granulocytes | Cycs        |
| 1.37E-56 | 0.96160664 | 0.139 | 0.02  | 1.94E-52 | Granulocytes | Ppp1r3b     |
| 1.76E-56 | 1.41113001 | 0.524 | 0.26  | 2.49E-52 | Granulocytes | Sell        |
| 2.06E-56 | -1.7950776 | 0.061 | 0.439 | 2.92E-52 | Granulocytes | Cd69        |
| 2.32E-56 | 0.9837606  | 0.153 | 0.024 | 3.28E-52 | Granulocytes | Nfe2        |
| 2.67E-56 | -1.1898861 | 0.045 | 0.429 | 3.77E-52 | Granulocytes | Tmed9       |
| 7.84E-56 | 1.92994535 | 0.429 | 0.188 | 1.11E-51 | Granulocytes | Dgat1       |
| 8.66E-56 | -1.7815473 | 0.035 | 0.402 | 1.23E-51 | Granulocytes | Ctsc        |
| 2.45E-55 | -1.0044591 | 0.452 | 0.821 | 3.47E-51 | Granulocytes | Sub1        |
| 3.12E-55 | -1.7611289 | 0.155 | 0.557 | 4.41E-51 | Granulocytes | Dnajb1      |
| 4.53E-55 | 1.47271528 | 0.237 | 0.06  | 6.41E-51 | Granulocytes | 4833407H14I |
| 5.00E-55 | -1.1484791 | 0.067 | 0.447 | 7.08E-51 | Granulocytes | Tbca        |
| 1.04E-54 | -2.0001284 | 0.045 | 0.413 | 1.47E-50 | Granulocytes | S100a4      |
| 1.91E-54 | -1.7113039 | 0.035 | 0.393 | 2.70E-50 | Granulocytes | H2-DMa      |
| 3.06E-54 | -1.3497176 | 0.088 | 0.473 | 4.33E-50 | Granulocytes | Pdia3       |
| 1.26E-53 | -1.2604487 | 0.072 | 0.449 | 1.79E-49 | Granulocytes | Arl6ip5     |
| 2.64E-53 | -1.1846046 | 0.067 | 0.444 | 3.74E-49 | Granulocytes | Atp5g1      |
| 4.60E-53 | -1.1607391 | 0.112 | 0.505 | 6.51E-49 | Granulocytes | Cox7b       |
| 7.48E-53 | -1.3054877 | 0.035 | 0.394 | 1.06E-48 | Granulocytes | Nme1        |
| 9.26E-53 | 1.25370431 | 0.708 | 0.517 | 1.31E-48 | Granulocytes | Sat1        |
| 1.10E-52 | 1.5609345  | 0.174 | 0.033 | 1.55E-48 | Granulocytes | Csf1        |
| 1.31E-52 | -1.2618466 | 0.041 | 0.398 | 1.85E-48 | Granulocytes | Banf1       |
| 1.67E-52 | -1.3383866 | 0.039 | 0.394 | 2.36E-48 | Granulocytes | Prdx2       |
| 1.75E-52 | -2.1652774 | 0.047 | 0.407 | 2.48E-48 | Granulocytes | Gm26917     |
| 2.32E-52 | 0.87950257 | 0.129 | 0.018 | 3.29E-48 | Granulocytes | Arap3       |

|          |            |       |       |          |                       |
|----------|------------|-------|-------|----------|-----------------------|
| 3.63E-52 | -1.1212423 | 0.09  | 0.475 | 5.14E-48 | Granulocytes Hnrnpab  |
| 4.05E-52 | 1.19143901 | 0.221 | 0.053 | 5.74E-48 | Granulocytes Cd63     |
| 4.77E-52 | 1.21840467 | 0.434 | 0.175 | 6.75E-48 | Granulocytes Cd24a    |
| 5.28E-52 | 1.71942407 | 0.503 | 0.278 | 7.48E-48 | Granulocytes Card19   |
| 5.70E-52 | -1.2755628 | 0.031 | 0.381 | 8.07E-48 | Granulocytes Pebp1    |
| 8.82E-52 | -1.2618962 | 0.09  | 0.468 | 1.25E-47 | Granulocytes H2-Q4    |
| 8.83E-52 | -1.1814477 | 0.063 | 0.434 | 1.25E-47 | Granulocytes Anp32b   |
| 9.74E-52 | 1.63008733 | 0.37  | 0.148 | 1.38E-47 | Granulocytes Entpd1   |
| 1.62E-51 | 1.66741271 | 0.417 | 0.184 | 2.29E-47 | Granulocytes Kctd12   |
| 1.92E-51 | -1.542474  | 0.014 | 0.356 | 2.71E-47 | Granulocytes Ikzf3    |
| 2.06E-51 | -1.1654771 | 0.053 | 0.412 | 2.92E-47 | Granulocytes Ndufb5   |
| 2.20E-51 | 1.67703984 | 0.62  | 0.419 | 3.12E-47 | Granulocytes Plek     |
| 2.34E-51 | -1.0382782 | 0.145 | 0.542 | 3.32E-47 | Granulocytes Psmb1    |
| 4.95E-51 | -0.9367711 | 0.127 | 0.525 | 7.00E-47 | Granulocytes Tra2b    |
| 5.57E-51 | -1.0872768 | 0.119 | 0.507 | 7.88E-47 | Granulocytes Atp5b    |
| 7.02E-51 | -1.7545369 | 0.035 | 0.381 | 9.93E-47 | Granulocytes Lat      |
| 8.14E-51 | -1.0076044 | 0.264 | 0.669 | 1.15E-46 | Granulocytes Cox6c    |
| 8.78E-51 | -1.1855382 | 0.19  | 0.589 | 1.24E-46 | Granulocytes Emp3     |
| 1.04E-50 | -1.872461  | 0.025 | 0.364 | 1.47E-46 | Granulocytes Sh2d2a   |
| 1.29E-50 | -1.406032  | 0.033 | 0.378 | 1.83E-46 | Granulocytes Ms4a6b   |
| 1.51E-50 | -1.2942292 | 0.035 | 0.383 | 2.14E-46 | Granulocytes Dbi      |
| 1.66E-50 | -0.9837401 | 0.221 | 0.63  | 2.35E-46 | Granulocytes Atp5j2   |
| 2.11E-50 | -1.2060219 | 0.07  | 0.429 | 2.99E-46 | Granulocytes Rnaset2b |
| 2.23E-50 | -1.2353781 | 0.233 | 0.629 | 3.16E-46 | Granulocytes Arl6ip1  |
| 2.37E-50 | -1.1579536 | 0.037 | 0.383 | 3.36E-46 | Granulocytes Emg1     |
| 2.92E-50 | -1.7496331 | 0.039 | 0.383 | 4.13E-46 | Granulocytes Hsph1    |
| 9.19E-50 | -0.9979361 | 0.331 | 0.729 | 1.30E-45 | Granulocytes Pabpc1   |
| 1.09E-49 | -1.0597465 | 0.096 | 0.467 | 1.54E-45 | Granulocytes Atp5o    |
| 1.81E-49 | -1.4107867 | 0.022 | 0.359 | 2.56E-45 | Granulocytes Gimap4   |
| 1.82E-49 | -1.2609953 | 0.055 | 0.413 | 2.58E-45 | Granulocytes Psmb10   |
| 2.24E-49 | -1.2945448 | 0.02  | 0.35  | 3.17E-45 | Granulocytes Ranbp1   |
| 4.37E-49 | -1.156313  | 0.061 | 0.41  | 6.18E-45 | Granulocytes Ndufa11  |
| 5.20E-49 | -1.6252018 | 0.016 | 0.344 | 7.36E-45 | Granulocytes Lck      |
| 9.33E-49 | -1.1686859 | 0.045 | 0.389 | 1.32E-44 | Granulocytes Eif3c    |
| 1.02E-48 | -1.1338411 | 0.039 | 0.381 | 1.45E-44 | Granulocytes Manf     |
| 1.20E-48 | 1.48522169 | 0.673 | 0.531 | 1.69E-44 | Granulocytes Prr13    |
| 1.76E-48 | -1.2936203 | 0.027 | 0.355 | 2.49E-44 | Granulocytes Mndal    |
| 2.24E-48 | -1.4801769 | 0.02  | 0.348 | 3.17E-44 | Granulocytes Gimap3   |
| 4.70E-48 | -1.9153466 | 0.059 | 0.401 | 6.65E-44 | Granulocytes Ifi30    |
| 6.25E-48 | -1.0636788 | 0.027 | 0.357 | 8.85E-44 | Granulocytes Snrpd1   |
| 6.36E-48 | -1.467562  | 0.059 | 0.401 | 9.00E-44 | Granulocytes Foxp1    |
| 7.76E-48 | -1.169991  | 0.016 | 0.34  | 1.10E-43 | Granulocytes Akr1b3   |
| 7.90E-48 | -0.9653949 | 0.09  | 0.455 | 1.12E-43 | Granulocytes Tomm20   |
| 8.43E-48 | -1.3192036 | 0.012 | 0.334 | 1.19E-43 | Granulocytes Gimap1   |
| 1.04E-47 | -0.7315701 | 0.763 | 0.936 | 1.48E-43 | Granulocytes B2m      |
| 1.07E-47 | 1.52224252 | 0.405 | 0.184 | 1.51E-43 | Granulocytes Picalm   |
| 1.50E-47 | -1.0486762 | 0.053 | 0.399 | 2.12E-43 | Granulocytes Eif3m    |
| 1.85E-47 | -1.8619253 | 0.055 | 0.393 | 2.62E-43 | Granulocytes Rgs1     |

|          |            |       |       |          |                      |
|----------|------------|-------|-------|----------|----------------------|
| 2.48E-47 | -1.9403653 | 0.02  | 0.342 | 3.51E-43 | Granulocytes Ctsw    |
| 2.92E-47 | -0.976483  | 0.194 | 0.586 | 4.13E-43 | Granulocytes Atp5c1  |
| 3.00E-47 | -2.4773872 | 0.043 | 0.366 | 4.25E-43 | Granulocytes Cd8b1   |
| 3.76E-47 | -1.1283436 | 0.076 | 0.422 | 5.32E-43 | Granulocytes Spcs2   |
| 6.58E-47 | 1.64991099 | 0.35  | 0.143 | 9.31E-43 | Granulocytes Snap23  |
| 7.25E-47 | -1.7122145 | 0.025 | 0.344 | 1.03E-42 | Granulocytes Thy1    |
| 7.81E-47 | -1.4045237 | 0.022 | 0.344 | 1.11E-42 | Granulocytes Ablim1  |
| 1.05E-46 | -0.9803555 | 0.145 | 0.529 | 1.49E-42 | Granulocytes Psma3   |
| 1.07E-46 | -0.8314977 | 0.509 | 0.829 | 1.52E-42 | Granulocytes Chchd2  |
| 1.52E-46 | -1.1061114 | 0.1   | 0.46  | 2.15E-42 | Granulocytes Tpr     |
| 1.67E-46 | -1.0966323 | 0.096 | 0.444 | 2.37E-42 | Granulocytes Uqcrfs1 |
| 1.84E-46 | -0.9102161 | 0.16  | 0.543 | 2.61E-42 | Granulocytes Ube2i   |
| 1.92E-46 | -1.2689005 | 0.025 | 0.347 | 2.72E-42 | Granulocytes Ifi203  |
| 2.03E-46 | 1.38714167 | 0.294 | 0.102 | 2.88E-42 | Granulocytes Itgam   |
| 3.71E-46 | -1.1383401 | 0.055 | 0.385 | 5.26E-42 | Granulocytes Dek     |
| 3.87E-46 | -1.0166708 | 0.112 | 0.472 | 5.48E-42 | Granulocytes Srsf2   |
| 4.27E-46 | -1.03829   | 0.092 | 0.445 | 6.05E-42 | Granulocytes Hnrnpl  |
| 5.04E-46 | 1.40007351 | 0.329 | 0.124 | 7.13E-42 | Granulocytes Cd300a  |
| 5.38E-46 | -1.5674037 | 0.045 | 0.371 | 7.62E-42 | Granulocytes Itgb1   |
| 7.97E-46 | 1.76805923 | 0.348 | 0.143 | 1.13E-41 | Granulocytes Cwc25   |
| 8.83E-46 | 1.51500013 | 0.507 | 0.285 | 1.25E-41 | Granulocytes Nfe2l2  |
| 1.62E-45 | -1.1080913 | 0.08  | 0.418 | 2.29E-41 | Granulocytes Ndufv3  |
| 1.77E-45 | -1.1636619 | 0.027 | 0.342 | 2.50E-41 | Granulocytes Pole4   |
| 3.57E-45 | -1.1060025 | 0.041 | 0.36  | 5.06E-41 | Granulocytes Ndufc2  |
| 5.80E-45 | -1.6416904 | 0.025 | 0.337 | 8.20E-41 | Granulocytes Irf8    |
| 6.40E-45 | -0.9650779 | 0.033 | 0.358 | 9.06E-41 | Granulocytes Set     |
| 7.93E-45 | -0.9757546 | 0.076 | 0.416 | 1.12E-40 | Granulocytes Psmb6   |
| 8.09E-45 | -0.8693457 | 0.16  | 0.542 | 1.14E-40 | Granulocytes Polr1d  |
| 1.16E-44 | -2.0495981 | 0.018 | 0.326 | 1.64E-40 | Granulocytes Klrd1   |
| 1.20E-44 | -1.1135392 | 0.168 | 0.535 | 1.69E-40 | Granulocytes Ndfip1  |
| 1.24E-44 | -1.0814738 | 0.07  | 0.41  | 1.75E-40 | Granulocytes Calr    |
| 1.90E-44 | -1.0044629 | 0.121 | 0.482 | 2.69E-40 | Granulocytes Ssr4    |
| 2.08E-44 | -1.0296074 | 0.286 | 0.676 | 2.95E-40 | Granulocytes Hspa5   |
| 2.86E-44 | -0.9276453 | 0.123 | 0.484 | 4.04E-40 | Granulocytes Elf1    |
| 3.89E-44 | -2.2202834 | 0.027 | 0.331 | 5.51E-40 | Granulocytes Cd8a    |
| 4.25E-44 | -1.0111274 | 0.108 | 0.453 | 6.02E-40 | Granulocytes Psmb2   |
| 9.89E-44 | -1.0842365 | 0.02  | 0.326 | 1.40E-39 | Granulocytes Nt5c    |
| 1.10E-43 | -0.9095603 | 0.135 | 0.495 | 1.56E-39 | Granulocytes Zfp706  |
| 1.52E-43 | -0.9026275 | 0.139 | 0.503 | 2.15E-39 | Granulocytes Psma2   |
| 2.52E-43 | 1.4767524  | 0.254 | 0.082 | 3.57E-39 | Granulocytes Oasl2   |
| 2.53E-43 | -1.0342939 | 0.057 | 0.379 | 3.59E-39 | Granulocytes Snrpd2  |
| 2.77E-43 | -0.906284  | 0.235 | 0.606 | 3.91E-39 | Granulocytes Slc25a5 |
| 6.43E-43 | -0.8050765 | 0.141 | 0.514 | 9.10E-39 | Granulocytes Trmt112 |
| 7.11E-43 | -1.3171485 | 0.041 | 0.353 | 1.01E-38 | Granulocytes Bst2    |
| 7.90E-43 | -1.2534227 | 0.168 | 0.521 | 1.12E-38 | Granulocytes Ifngr1  |
| 8.33E-43 | -0.8833078 | 0.088 | 0.432 | 1.18E-38 | Granulocytes Lsm4    |
| 1.79E-42 | -1.7521585 | 0.027 | 0.325 | 2.54E-38 | Granulocytes Cd83    |
| 1.81E-42 | -1.1673436 | 0.043 | 0.356 | 2.56E-38 | Granulocytes Macf1   |

|          |            |       |       |          |                        |
|----------|------------|-------|-------|----------|------------------------|
| 2.68E-42 | -1.0111882 | 0.049 | 0.365 | 3.79E-38 | Granulocytes Sec11a    |
| 2.83E-42 | 1.11086577 | 0.166 | 0.037 | 4.01E-38 | Granulocytes Pilrb1    |
| 3.80E-42 | 0.85507436 | 0.115 | 0.018 | 5.38E-38 | Granulocytes Mapk13    |
| 7.21E-42 | -1.0706751 | 0.037 | 0.34  | 1.02E-37 | Granulocytes Tmem160   |
| 7.80E-42 | -1.1641313 | 0.037 | 0.341 | 1.10E-37 | Granulocytes Mrps6     |
| 8.83E-42 | -0.980735  | 0.082 | 0.407 | 1.25E-37 | Granulocytes Nap111    |
| 1.03E-41 | -1.0243963 | 0.029 | 0.324 | 1.46E-37 | Granulocytes Nudc      |
| 1.09E-41 | -0.9750541 | 0.09  | 0.424 | 1.54E-37 | Granulocytes Park7     |
| 1.39E-41 | -1.0875023 | 0.025 | 0.322 | 1.97E-37 | Granulocytes Slc25a4   |
| 1.77E-41 | -1.6537224 | 0.012 | 0.299 | 2.51E-37 | Granulocytes Cst7      |
| 1.78E-41 | -1.1083773 | 0.029 | 0.324 | 2.52E-37 | Granulocytes Fkbp3     |
| 3.94E-41 | -1.0548096 | 0.045 | 0.347 | 5.57E-37 | Granulocytes Pdpf      |
| 4.61E-41 | -0.9791679 | 0.043 | 0.349 | 6.52E-37 | Granulocytes Ddx39b    |
| 5.12E-41 | 0.5908868  | 0.955 | 0.914 | 7.24E-37 | Granulocytes Cd52      |
| 1.11E-40 | -0.9829349 | 0.115 | 0.453 | 1.57E-36 | Granulocytes Bsg       |
| 1.24E-40 | -0.8102404 | 0.061 | 0.374 | 1.75E-36 | Granulocytes Tcea1     |
| 1.40E-40 | -0.8774758 | 0.082 | 0.405 | 1.99E-36 | Granulocytes Bax       |
| 1.58E-40 | -0.8589736 | 0.225 | 0.598 | 2.23E-36 | Granulocytes Cd47      |
| 1.66E-40 | 1.46575237 | 0.548 | 0.387 | 2.36E-36 | Granulocytes Atp6v1g1  |
| 1.79E-40 | -0.6958235 | 0.141 | 0.489 | 2.54E-36 | Granulocytes Dusp2     |
| 2.20E-40 | -0.7794878 | 0.325 | 0.715 | 3.11E-36 | Granulocytes Hnrnpa2b1 |
| 3.62E-40 | -1.2699918 | 0.11  | 0.437 | 5.12E-36 | Granulocytes Id2       |
| 4.45E-40 | -1.4142597 | 0.037 | 0.326 | 6.30E-36 | Granulocytes Ly86      |
| 4.48E-40 | -1.0185071 | 0.031 | 0.322 | 6.35E-36 | Granulocytes Fbl       |
| 4.54E-40 | -0.8879917 | 0.047 | 0.354 | 6.43E-36 | Granulocytes Timm13    |
| 5.49E-40 | -0.9430417 | 0.104 | 0.432 | 7.77E-36 | Granulocytes Brd2      |
| 5.65E-40 | -1.1043569 | 0.022 | 0.308 | 8.00E-36 | Granulocytes Acp5      |
| 6.44E-40 | -0.909774  | 0.055 | 0.361 | 9.11E-36 | Granulocytes Sarnp     |
| 6.45E-40 | 1.53171957 | 0.505 | 0.308 | 9.13E-36 | Granulocytes Fosl2     |
| 7.70E-40 | 1.94599432 | 0.413 | 0.209 | 1.09E-35 | Granulocytes Marcks11  |
| 1.08E-39 | -0.8147553 | 0.211 | 0.574 | 1.52E-35 | Granulocytes Tma7      |
| 1.35E-39 | -1.1348364 | 0.031 | 0.316 | 1.91E-35 | Granulocytes Pycard    |
| 1.36E-39 | -1.2306888 | 0.033 | 0.32  | 1.92E-35 | Granulocytes Gm8369    |
| 1.60E-39 | -0.8219923 | 0.297 | 0.671 | 2.27E-35 | Granulocytes Ptpn18    |
| 1.92E-39 | 1.35154229 | 0.56  | 0.375 | 2.72E-35 | Granulocytes Samsn1    |
| 1.94E-39 | -1.2337194 | 0.014 | 0.292 | 2.74E-35 | Granulocytes Hmgn1     |
| 2.54E-39 | -0.7495086 | 0.155 | 0.512 | 3.59E-35 | Granulocytes Cox7a2l   |
| 3.22E-39 | -0.8624995 | 0.086 | 0.406 | 4.56E-35 | Granulocytes Pgl3      |
| 4.21E-39 | -1.113795  | 0.018 | 0.298 | 5.96E-35 | Granulocytes Dock10    |
| 4.77E-39 | -0.9065293 | 0.049 | 0.345 | 6.75E-35 | Granulocytes Phb2      |
| 5.09E-39 | -0.9865802 | 0.027 | 0.308 | 7.20E-35 | Granulocytes Tcp1      |
| 5.59E-39 | -0.9852835 | 0.027 | 0.309 | 7.91E-35 | Granulocytes Ndufa5    |
| 5.76E-39 | 1.07640873 | 0.732 | 0.611 | 8.16E-35 | Granulocytes Stk17b    |
| 5.77E-39 | -0.7550812 | 0.09  | 0.414 | 8.17E-35 | Granulocytes Eif2s2    |
| 5.77E-39 | -0.8857967 | 0.043 | 0.337 | 8.17E-35 | Granulocytes Bola2     |
| 6.45E-39 | 1.07857899 | 0.19  | 0.051 | 9.13E-35 | Granulocytes Rnf144a   |
| 7.89E-39 | -1.0057281 | 0.102 | 0.423 | 1.12E-34 | Granulocytes Akr1a1    |
| 8.35E-39 | -0.8589299 | 0.204 | 0.566 | 1.18E-34 | Granulocytes Edf1      |

|          |            |       |       |          |                         |
|----------|------------|-------|-------|----------|-------------------------|
| 1.03E-38 | -1.0150079 | 0.063 | 0.363 | 1.46E-34 | Granulocytes B4galnt1   |
| 1.15E-38 | -0.9969634 | 0.104 | 0.423 | 1.63E-34 | Granulocytes S100a13    |
| 1.17E-38 | -0.9330151 | 0.065 | 0.366 | 1.66E-34 | Granulocytes Cct2       |
| 1.25E-38 | -0.9493588 | 0.039 | 0.325 | 1.77E-34 | Granulocytes Mrpl54     |
| 1.44E-38 | -1.5615165 | 0.039 | 0.323 | 2.03E-34 | Granulocytes Klf4       |
| 2.00E-38 | -0.8616226 | 0.07  | 0.381 | 2.84E-34 | Granulocytes Llph       |
| 2.10E-38 | -1.666016  | 0.014 | 0.285 | 2.97E-34 | Granulocytes Icos       |
| 2.13E-38 | -0.8921437 | 0.031 | 0.314 | 3.02E-34 | Granulocytes Bcas2      |
| 2.17E-38 | -0.8711936 | 0.063 | 0.369 | 3.07E-34 | Granulocytes Txn2       |
| 3.40E-38 | -0.706854  | 0.143 | 0.494 | 4.81E-34 | Granulocytes Sf3b6      |
| 3.48E-38 | -1.0160506 | 0.025 | 0.302 | 4.92E-34 | Granulocytes Ddx21      |
| 4.22E-38 | -0.8461437 | 0.084 | 0.395 | 5.97E-34 | Granulocytes Snrpd3     |
| 5.39E-38 | -0.7178732 | 0.585 | 0.864 | 7.63E-34 | Granulocytes Calm1      |
| 5.89E-38 | 1.26674137 | 0.249 | 0.086 | 8.34E-34 | Granulocytes Igsf6      |
| 6.40E-38 | -0.7656498 | 0.168 | 0.529 | 9.06E-34 | Granulocytes Srsf3      |
| 6.68E-38 | -0.8909585 | 0.063 | 0.364 | 9.46E-34 | Granulocytes Ociad1     |
| 8.93E-38 | -0.7943178 | 0.239 | 0.597 | 1.26E-33 | Granulocytes Atp5j      |
| 9.77E-38 | -1.6089337 | 0.02  | 0.292 | 1.38E-33 | Granulocytes Tigit      |
| 9.99E-38 | 1.51588056 | 0.466 | 0.276 | 1.41E-33 | Granulocytes Kdm6b      |
| 1.00E-37 | -0.8886906 | 0.182 | 0.525 | 1.42E-33 | Granulocytes Abracl     |
| 1.19E-37 | -0.8567044 | 0.082 | 0.392 | 1.69E-33 | Granulocytes Sfr1       |
| 1.21E-37 | -0.857127  | 0.174 | 0.52  | 1.72E-33 | Granulocytes Psma7      |
| 1.40E-37 | -1.0223971 | 0.088 | 0.397 | 1.98E-33 | Granulocytes Prrc2c     |
| 1.43E-37 | -0.9126395 | 0.045 | 0.331 | 2.03E-33 | Granulocytes Nudt21     |
| 1.62E-37 | -0.7908696 | 0.147 | 0.494 | 2.30E-33 | Granulocytes Srsf7      |
| 2.04E-37 | -0.9807389 | 0.022 | 0.294 | 2.88E-33 | Granulocytes Tmem256    |
| 2.07E-37 | -0.9437021 | 0.047 | 0.334 | 2.93E-33 | Granulocytes Psma4      |
| 2.74E-37 | 0.8107602  | 0.1   | 0.016 | 3.88E-33 | Granulocytes B430306N03 |
| 2.96E-37 | -0.8871047 | 0.051 | 0.34  | 4.19E-33 | Granulocytes Cct5       |
| 3.31E-37 | -1.1824061 | 0.029 | 0.302 | 4.69E-33 | Granulocytes Il21r      |
| 3.34E-37 | -0.929282  | 0.035 | 0.317 | 4.73E-33 | Granulocytes Slc50a1    |
| 3.35E-37 | -0.9378046 | 0.055 | 0.343 | 4.74E-33 | Granulocytes Mettl23    |
| 4.21E-37 | -0.9751882 | 0.031 | 0.304 | 5.95E-33 | Granulocytes Metap2     |
| 4.28E-37 | -0.8301264 | 0.123 | 0.446 | 6.06E-33 | Granulocytes Tuba1a     |
| 5.26E-37 | -1.8359346 | 0.022 | 0.291 | 7.45E-33 | Granulocytes Pcdcd1     |
| 5.43E-37 | -1.5532626 | 0.014 | 0.278 | 7.68E-33 | Granulocytes Il2rb      |
| 6.20E-37 | -0.8856102 | 0.01  | 0.274 | 8.78E-33 | Granulocytes Churc1     |
| 6.91E-37 | -1.044579  | 0.025 | 0.292 | 9.78E-33 | Granulocytes Smc6       |
| 9.23E-37 | -1.022031  | 0.047 | 0.328 | 1.31E-32 | Granulocytes Mat2a      |
| 9.87E-37 | -0.808527  | 0.09  | 0.396 | 1.40E-32 | Granulocytes Cwc15      |
| 9.96E-37 | -0.9628877 | 0.043 | 0.327 | 1.41E-32 | Granulocytes Atp1a1     |
| 1.06E-36 | -0.8187476 | 0.11  | 0.421 | 1.51E-32 | Granulocytes Hnrnpdl    |
| 1.63E-36 | -0.9160804 | 0.141 | 0.466 | 2.31E-32 | Granulocytes Tubb4b     |
| 1.64E-36 | -0.8794616 | 0.041 | 0.321 | 2.33E-32 | Granulocytes Ssr2       |
| 1.76E-36 | 1.44902946 | 0.329 | 0.148 | 2.50E-32 | Granulocytes Pgd        |
| 2.25E-36 | 1.17430193 | 0.209 | 0.064 | 3.18E-32 | Granulocytes Tmem154    |
| 2.58E-36 | -0.7557488 | 0.106 | 0.428 | 3.66E-32 | Granulocytes Skp1a      |
| 2.74E-36 | -0.8273094 | 0.078 | 0.378 | 3.88E-32 | Granulocytes H2afy      |

|          |            |       |       |          |                         |
|----------|------------|-------|-------|----------|-------------------------|
| 3.54E-36 | 0.76776718 | 0.834 | 0.778 | 5.01E-32 | Granulocytes Arpc1b     |
| 4.07E-36 | -0.6903989 | 0.168 | 0.514 | 5.76E-32 | Granulocytes Ndufb11    |
| 4.23E-36 | -0.8200863 | 0.041 | 0.318 | 5.99E-32 | Granulocytes Psmc3      |
| 4.38E-36 | 1.36489931 | 0.27  | 0.101 | 6.20E-32 | Granulocytes Hist1h2bc  |
| 5.51E-36 | -0.8904527 | 0.033 | 0.3   | 7.80E-32 | Granulocytes Ddost      |
| 5.63E-36 | -0.7883959 | 0.102 | 0.416 | 7.97E-32 | Granulocytes Bzw1       |
| 5.84E-36 | -0.791234  | 0.303 | 0.65  | 8.27E-32 | Granulocytes Atp5h      |
| 6.57E-36 | -0.8695094 | 0.078 | 0.373 | 9.31E-32 | Granulocytes Ostc       |
| 7.19E-36 | -2.3194299 | 0.035 | 0.298 | 1.02E-31 | Granulocytes Ccr7       |
| 8.82E-36 | -0.9690797 | 0.012 | 0.269 | 1.25E-31 | Granulocytes Fundc2     |
| 1.25E-35 | -0.7380742 | 0.067 | 0.362 | 1.77E-31 | Granulocytes Pcdcd5     |
| 1.33E-35 | 1.03317362 | 0.64  | 0.495 | 1.89E-31 | Granulocytes Selplg     |
| 1.40E-35 | 1.19128148 | 0.247 | 0.088 | 1.98E-31 | Granulocytes Lpcat2     |
| 1.45E-35 | -0.8549116 | 0.037 | 0.307 | 2.06E-31 | Granulocytes Cox16      |
| 1.51E-35 | -0.8512505 | 0.074 | 0.364 | 2.13E-31 | Granulocytes Ssb        |
| 1.52E-35 | -0.7716612 | 0.108 | 0.42  | 2.16E-31 | Granulocytes Med28      |
| 1.68E-35 | -0.6635469 | 0.1   | 0.411 | 2.38E-31 | Granulocytes Ndufb10    |
| 1.71E-35 | -0.8021056 | 0.059 | 0.344 | 2.42E-31 | Granulocytes Uqcrc1     |
| 1.99E-35 | -0.724509  | 0.178 | 0.524 | 2.82E-31 | Granulocytes Pcbp1      |
| 2.87E-35 | -0.8010036 | 0.049 | 0.327 | 4.06E-31 | Granulocytes Ube2v1     |
| 3.41E-35 | -0.8066846 | 0.063 | 0.351 | 4.83E-31 | Granulocytes Wdr83os    |
| 3.58E-35 | -0.8318164 | 0.164 | 0.493 | 5.07E-31 | Granulocytes Gdi2       |
| 4.23E-35 | -0.7440448 | 0.084 | 0.381 | 5.98E-31 | Granulocytes Ptp4a2     |
| 4.94E-35 | -0.8050499 | 0.074 | 0.364 | 6.99E-31 | Granulocytes Ywhaq      |
| 5.45E-35 | -0.7640591 | 0.076 | 0.374 | 7.72E-31 | Granulocytes Psmb4      |
| 5.71E-35 | 1.2143127  | 0.364 | 0.177 | 8.08E-31 | Granulocytes Csf2ra     |
| 5.83E-35 | -0.7938796 | 0.047 | 0.325 | 8.26E-31 | Granulocytes Timm23     |
| 6.81E-35 | 1.45060376 | 0.342 | 0.161 | 9.64E-31 | Granulocytes Ncf1       |
| 7.73E-35 | -1.3124873 | 0.02  | 0.277 | 1.09E-30 | Granulocytes Itk        |
| 8.18E-35 | 0.92715329 | 0.147 | 0.035 | 1.16E-30 | Granulocytes Dgat2      |
| 9.23E-35 | 1.27961049 | 0.209 | 0.067 | 1.31E-30 | Granulocytes Tctex1d2   |
| 9.74E-35 | 0.52228161 | 0.922 | 0.858 | 1.38E-30 | Granulocytes H3f3a      |
| 1.21E-34 | 0.80878213 | 0.671 | 0.526 | 1.72E-30 | Granulocytes Hmgb2      |
| 1.39E-34 | -0.9458643 | 0.088 | 0.381 | 1.96E-30 | Granulocytes Saraf      |
| 1.41E-34 | -2.3351661 | 0.008 | 0.254 | 2.00E-30 | Granulocytes Gzmb       |
| 1.44E-34 | -0.9155414 | 0.029 | 0.291 | 2.04E-30 | Granulocytes Ptbp1      |
| 1.66E-34 | -0.7560538 | 0.317 | 0.66  | 2.35E-30 | Granulocytes Cox5b      |
| 1.68E-34 | -1.1008705 | 0.02  | 0.276 | 2.38E-30 | Granulocytes Skap1      |
| 1.69E-34 | 1.17997392 | 0.673 | 0.621 | 2.39E-30 | Granulocytes D8Ertd738e |
| 2.11E-34 | -1.0616454 | 0.016 | 0.269 | 2.98E-30 | Granulocytes Zgpat      |
| 2.15E-34 | -0.8324774 | 0.043 | 0.312 | 3.04E-30 | Granulocytes Mrps14     |
| 2.23E-34 | 0.93877786 | 0.121 | 0.024 | 3.15E-30 | Granulocytes Il15       |
| 2.61E-34 | -0.6823163 | 0.108 | 0.418 | 3.69E-30 | Granulocytes Psmc8      |
| 2.76E-34 | -0.8317278 | 0.07  | 0.348 | 3.90E-30 | Granulocytes Romo1      |
| 3.23E-34 | -0.7499192 | 0.172 | 0.502 | 4.57E-30 | Granulocytes Rnaset2a   |
| 3.68E-34 | -0.7966534 | 0.088 | 0.384 | 5.21E-30 | Granulocytes Ddx24      |
| 4.46E-34 | -0.8914953 | 0.02  | 0.272 | 6.31E-30 | Granulocytes Pa2g4      |
| 5.33E-34 | -0.8197151 | 0.027 | 0.284 | 7.54E-30 | Granulocytes Idh3b      |

|          |            |       |       |          |                       |
|----------|------------|-------|-------|----------|-----------------------|
| 6.31E-34 | -0.7903751 | 0.065 | 0.345 | 8.94E-30 | Granulocytes Vcp      |
| 7.30E-34 | -0.9322987 | 0.084 | 0.37  | 1.03E-29 | Granulocytes Crem     |
| 7.45E-34 | -0.702232  | 0.213 | 0.548 | 1.05E-29 | Granulocytes Hnnpf    |
| 8.63E-34 | 0.96163034 | 0.127 | 0.027 | 1.22E-29 | Granulocytes Gm14548  |
| 9.98E-34 | -0.8444514 | 0.016 | 0.265 | 1.41E-29 | Granulocytes Lsm5     |
| 1.24E-33 | -0.9760889 | 0.078 | 0.358 | 1.76E-29 | Granulocytes mt-Nd3   |
| 1.33E-33 | -0.8069109 | 0.072 | 0.348 | 1.88E-29 | Granulocytes Cct7     |
| 1.41E-33 | -0.8109134 | 0.043 | 0.304 | 2.00E-29 | Granulocytes Mrpl23   |
| 1.49E-33 | -1.7701658 | 0.01  | 0.252 | 2.11E-29 | Granulocytes Ctla4    |
| 1.56E-33 | -0.827235  | 0.119 | 0.417 | 2.21E-29 | Granulocytes Cope     |
| 1.58E-33 | -0.7667938 | 0.047 | 0.314 | 2.24E-29 | Granulocytes Tsn      |
| 1.70E-33 | -0.8675099 | 0.043 | 0.305 | 2.41E-29 | Granulocytes Cyc1     |
| 1.75E-33 | -1.2463523 | 0.022 | 0.272 | 2.48E-29 | Granulocytes Tnfrsf18 |
| 1.87E-33 | -1.0996448 | 0.102 | 0.393 | 2.64E-29 | Granulocytes Rel      |
| 1.94E-33 | -0.6979302 | 0.051 | 0.322 | 2.75E-29 | Granulocytes Ndufv2   |
| 1.96E-33 | -0.9188506 | 0.027 | 0.28  | 2.78E-29 | Granulocytes Esyt1    |
| 1.98E-33 | -0.7906419 | 0.07  | 0.348 | 2.80E-29 | Granulocytes Cacybp   |
| 2.09E-33 | -1.1934349 | 0.01  | 0.251 | 2.96E-29 | Granulocytes Gimap7   |
| 2.12E-33 | -0.8146845 | 0.072 | 0.348 | 3.00E-29 | Granulocytes Cdc37    |
| 2.64E-33 | -0.8745457 | 0.057 | 0.329 | 3.73E-29 | Granulocytes Dnajc3   |
| 2.73E-33 | -0.7351391 | 0.168 | 0.488 | 3.86E-29 | Granulocytes Pomp     |
| 2.97E-33 | 1.32403542 | 0.247 | 0.091 | 4.21E-29 | Granulocytes Gadd45a  |
| 3.26E-33 | -0.8270901 | 0.049 | 0.313 | 4.61E-29 | Granulocytes Ndufc1   |
| 3.43E-33 | -0.8819655 | 0.025 | 0.275 | 4.86E-29 | Granulocytes Anp32e   |
| 4.23E-33 | -0.8105304 | 0.086 | 0.373 | 5.98E-29 | Granulocytes Rps27l   |
| 4.44E-33 | -0.7410943 | 0.188 | 0.52  | 6.29E-29 | Granulocytes Eif4g2   |
| 4.58E-33 | 0.74147203 | 0.873 | 0.782 | 6.48E-29 | Granulocytes Btg1     |
| 5.58E-33 | -1.0585207 | 0.022 | 0.269 | 7.90E-29 | Granulocytes Gimap5   |
| 5.85E-33 | 0.84558957 | 0.783 | 0.763 | 8.28E-29 | Granulocytes Arpc3    |
| 6.46E-33 | -0.6424329 | 0.157 | 0.479 | 9.14E-29 | Granulocytes Tmem258  |
| 6.92E-33 | -1.9631148 | 0.02  | 0.263 | 9.80E-29 | Granulocytes Cd79b    |
| 7.04E-33 | -1.0645738 | 0.051 | 0.311 | 9.96E-29 | Granulocytes Anxa5    |
| 7.83E-33 | -0.8779184 | 0.014 | 0.256 | 1.11E-28 | Granulocytes C1qbp    |
| 7.84E-33 | -0.8189029 | 0.033 | 0.284 | 1.11E-28 | Granulocytes Emc10    |
| 7.91E-33 | -0.8349256 | 0.09  | 0.376 | 1.12E-28 | Granulocytes Aprt     |
| 9.70E-33 | -0.8889284 | 0.039 | 0.295 | 1.37E-28 | Granulocytes Khdrbs1  |
| 1.04E-32 | -0.7860258 | 0.049 | 0.313 | 1.47E-28 | Granulocytes Ndufb2   |
| 1.18E-32 | -0.8805625 | 0.074 | 0.346 | 1.67E-28 | Granulocytes Syng2    |
| 1.29E-32 | -0.7667122 | 0.215 | 0.537 | 1.83E-28 | Granulocytes Psmb3    |
| 1.30E-32 | -0.8273477 | 0.027 | 0.275 | 1.84E-28 | Granulocytes Rexo2    |
| 1.36E-32 | 1.42690722 | 0.323 | 0.151 | 1.93E-28 | Granulocytes Marcks   |
| 1.41E-32 | 0.83898132 | 0.748 | 0.697 | 2.00E-28 | Granulocytes Gng5     |
| 1.46E-32 | -1.1538234 | 0.006 | 0.241 | 2.06E-28 | Granulocytes Dut      |
| 1.57E-32 | -0.6807915 | 0.082 | 0.361 | 2.23E-28 | Granulocytes Mrpl30   |
| 1.73E-32 | -1.1183026 | 0.014 | 0.253 | 2.45E-28 | Granulocytes Prkca    |
| 1.87E-32 | -0.8250656 | 0.029 | 0.275 | 2.65E-28 | Granulocytes Glrx3    |
| 2.53E-32 | -1.4602148 | 0.02  | 0.26  | 3.59E-28 | Granulocytes H2-DMb1  |
| 2.55E-32 | 1.11607574 | 0.648 | 0.569 | 3.61E-28 | Granulocytes Ypel3    |

|          |            |       |       |          |                         |
|----------|------------|-------|-------|----------|-------------------------|
| 2.87E-32 | -0.773869  | 0.033 | 0.284 | 4.07E-28 | Granulocytes Cct8       |
| 3.07E-32 | -1.2118597 | 0.018 | 0.258 | 4.35E-28 | Granulocytes Cd28       |
| 3.18E-32 | -0.9034329 | 0.039 | 0.292 | 4.51E-28 | Granulocytes Ak2        |
| 3.54E-32 | -0.7998098 | 0.043 | 0.301 | 5.01E-28 | Granulocytes Mrps16     |
| 3.80E-32 | -1.0145836 | 0.149 | 0.446 | 5.38E-28 | Granulocytes Sdf4       |
| 3.83E-32 | -0.8507757 | 0.098 | 0.384 | 5.42E-28 | Granulocytes H2-T22     |
| 4.62E-32 | -0.7386538 | 0.094 | 0.383 | 6.54E-28 | Granulocytes U2af1      |
| 5.02E-32 | 3.26680568 | 0.411 | 0.232 | 7.10E-28 | Granulocytes Wfdc17     |
| 5.98E-32 | -0.6253628 | 0.209 | 0.544 | 8.46E-28 | Granulocytes Arhgdia    |
| 6.21E-32 | -0.7888337 | 0.047 | 0.302 | 8.79E-28 | Granulocytes Cops6      |
| 6.39E-32 | -0.7126673 | 0.119 | 0.419 | 9.05E-28 | Granulocytes Ndufb8     |
| 8.20E-32 | -1.459666  | 0.17  | 0.459 | 1.16E-27 | Granulocytes Ctsb       |
| 8.35E-32 | -0.8150079 | 0.039 | 0.289 | 1.18E-27 | Granulocytes Eif4b      |
| 8.85E-32 | -0.8739886 | 0.033 | 0.278 | 1.25E-27 | Granulocytes Xrn2       |
| 9.07E-32 | -0.7040628 | 0.078 | 0.354 | 1.28E-27 | Granulocytes Cuta       |
| 9.45E-32 | -1.2112838 | 0.016 | 0.251 | 1.34E-27 | Granulocytes Pld4       |
| 9.96E-32 | 0.32021888 | 1     | 0.99  | 1.41E-27 | Granulocytes Actb       |
| 1.00E-31 | 1.20334041 | 0.211 | 0.072 | 1.42E-27 | Granulocytes Tcn2       |
| 1.11E-31 | -1.2099157 | 0.014 | 0.247 | 1.57E-27 | Granulocytes Cd27       |
| 1.21E-31 | -0.7934464 | 0.037 | 0.29  | 1.72E-27 | Granulocytes Mif4gd     |
| 1.24E-31 | -1.05036   | 0.035 | 0.281 | 1.76E-27 | Granulocytes Ptpn22     |
| 1.38E-31 | -0.4719082 | 0.106 | 0.394 | 1.96E-27 | Granulocytes 2-Mar      |
| 1.40E-31 | -0.7260952 | 0.041 | 0.296 | 1.98E-27 | Granulocytes Eif5b      |
| 1.41E-31 | -0.5666302 | 0.137 | 0.443 | 2.00E-27 | Granulocytes Ywhah      |
| 1.42E-31 | -0.7805237 | 0.139 | 0.439 | 2.02E-27 | Granulocytes Spcs1      |
| 1.83E-31 | -0.8132684 | 0.035 | 0.279 | 2.59E-27 | Granulocytes Aimp1      |
| 1.96E-31 | -0.890643  | 0.031 | 0.271 | 2.77E-27 | Granulocytes Npm3       |
| 2.13E-31 | -0.684846  | 0.133 | 0.435 | 3.02E-27 | Granulocytes Atp5k      |
| 2.51E-31 | -1.1382213 | 0.018 | 0.253 | 3.55E-27 | Granulocytes P2ry10     |
| 2.55E-31 | -0.7108348 | 0.053 | 0.316 | 3.61E-27 | Granulocytes Psma5      |
| 2.63E-31 | -0.7224226 | 0.149 | 0.453 | 3.73E-27 | Granulocytes Arf6       |
| 2.66E-31 | -0.8173473 | 0.033 | 0.274 | 3.77E-27 | Granulocytes Lsm7       |
| 2.98E-31 | -0.9874398 | 0.012 | 0.242 | 4.22E-27 | Granulocytes Cblb       |
| 2.99E-31 | 1.1888174  | 0.245 | 0.095 | 4.23E-27 | Granulocytes Gng12      |
| 3.15E-31 | -0.7418852 | 0.082 | 0.356 | 4.46E-27 | Granulocytes Ahsa1      |
| 3.63E-31 | -1.0885922 | 0.016 | 0.247 | 5.14E-27 | Granulocytes Slamf7     |
| 4.02E-31 | -0.5785936 | 0.08  | 0.355 | 5.68E-27 | Granulocytes Ghitm      |
| 4.10E-31 | -0.7557475 | 0.043 | 0.296 | 5.81E-27 | Granulocytes Ndufs3     |
| 4.20E-31 | 1.04606215 | 0.153 | 0.041 | 5.95E-27 | Granulocytes Tarm1      |
| 4.42E-31 | -0.9032333 | 0.018 | 0.251 | 6.25E-27 | Granulocytes Dhx9       |
| 4.92E-31 | -0.6002292 | 0.211 | 0.541 | 6.97E-27 | Granulocytes Hnrnpk     |
| 5.07E-31 | -0.7890324 | 0.027 | 0.265 | 7.18E-27 | Granulocytes Dnajc19    |
| 5.08E-31 | 1.67774284 | 0.427 | 0.268 | 7.20E-27 | Granulocytes Csrnp1     |
| 6.55E-31 | -0.7007053 | 0.072 | 0.34  | 9.27E-27 | Granulocytes Eif3a      |
| 8.93E-31 | -1.4780653 | 0.01  | 0.236 | 1.26E-26 | Granulocytes Lag3       |
| 1.16E-30 | 0.86745931 | 0.123 | 0.028 | 1.65E-26 | Granulocytes 6430548M08 |
| 1.30E-30 | -0.7561099 | 0.045 | 0.296 | 1.84E-26 | Granulocytes St13       |
| 1.32E-30 | -0.656881  | 0.057 | 0.316 | 1.87E-26 | Granulocytes Emc7       |



|          |            |       |       |          |                         |
|----------|------------|-------|-------|----------|-------------------------|
| 1.33E-30 | 0.72322999 | 0.804 | 0.764 | 1.88E-26 | Granulocytes Myl12b     |
| 1.36E-30 | -0.7877862 | 0.037 | 0.277 | 1.93E-26 | Granulocytes Sec13      |
| 1.57E-30 | -0.6527104 | 0.458 | 0.791 | 2.22E-26 | Granulocytes Rbm39      |
| 1.62E-30 | -0.62283   | 0.17  | 0.485 | 2.29E-26 | Granulocytes Sec62      |
| 1.71E-30 | -0.8083942 | 0.041 | 0.281 | 2.43E-26 | Granulocytes Uqcc2      |
| 1.75E-30 | -0.6444858 | 0.108 | 0.392 | 2.48E-26 | Granulocytes Swi5       |
| 1.96E-30 | -0.8602367 | 0.031 | 0.269 | 2.77E-26 | Granulocytes Pdia6      |
| 2.03E-30 | -1.4077064 | 0.02  | 0.248 | 2.87E-26 | Granulocytes Mef2c      |
| 2.22E-30 | 1.4353042  | 0.303 | 0.139 | 3.15E-26 | Granulocytes Myadm      |
| 2.26E-30 | -0.7856197 | 0.02  | 0.252 | 3.19E-26 | Granulocytes Eny2       |
| 2.43E-30 | -0.8883185 | 0.027 | 0.26  | 3.44E-26 | Granulocytes Runx3      |
| 2.97E-30 | -0.9168198 | 0.029 | 0.264 | 4.20E-26 | Granulocytes Rabgap1    |
| 3.09E-30 | 2.08990587 | 0.458 | 0.289 | 4.37E-26 | Granulocytes Isg15      |
| 3.14E-30 | -1.1228901 | 0.031 | 0.264 | 4.45E-26 | Granulocytes Prkch      |
| 3.34E-30 | -0.609901  | 0.092 | 0.371 | 4.73E-26 | Granulocytes Mrps24     |
| 3.35E-30 | -2.6615891 | 0.033 | 0.261 | 4.74E-26 | Granulocytes Cd79a      |
| 3.70E-30 | -1.1147051 | 0.006 | 0.227 | 5.23E-26 | Granulocytes Gpr171     |
| 4.94E-30 | -0.729132  | 0.115 | 0.393 | 6.99E-26 | Granulocytes Srsf11     |
| 5.03E-30 | -0.8907584 | 0.018 | 0.244 | 7.12E-26 | Granulocytes Phf11b     |
| 5.15E-30 | -0.771566  | 0.047 | 0.292 | 7.30E-26 | Granulocytes Ndufab1    |
| 5.48E-30 | -0.692114  | 0.137 | 0.424 | 7.76E-26 | Granulocytes Sdhd       |
| 5.79E-30 | -1.6863899 | 0.025 | 0.251 | 8.19E-26 | Granulocytes H2-DMb2    |
| 5.91E-30 | -0.7331839 | 0.012 | 0.235 | 8.37E-26 | Granulocytes Bola3      |
| 7.09E-30 | -1.4852358 | 0.008 | 0.227 | 1.00E-25 | Granulocytes Cxcr6      |
| 9.40E-30 | -0.7696525 | 0.047 | 0.295 | 1.33E-25 | Granulocytes Dnajc15    |
| 9.95E-30 | 1.09316447 | 0.245 | 0.098 | 1.41E-25 | Granulocytes Hist2h2aa1 |
| 1.13E-29 | -0.6532497 | 0.129 | 0.418 | 1.61E-25 | Granulocytes Vdac2      |
| 1.14E-29 | -0.8080296 | 0.031 | 0.259 | 1.61E-25 | Granulocytes Prmt1      |
| 1.27E-29 | -0.5995873 | 0.121 | 0.406 | 1.80E-25 | Granulocytes Esd        |
| 1.44E-29 | -1.1993876 | 0.02  | 0.247 | 2.04E-25 | Granulocytes Gem        |
| 1.49E-29 | -0.7266621 | 0.045 | 0.287 | 2.11E-25 | Granulocytes Commd4     |
| 1.66E-29 | -0.731876  | 0.155 | 0.451 | 2.35E-25 | Granulocytes Tgfb1      |
| 1.80E-29 | -0.777592  | 0.022 | 0.248 | 2.54E-25 | Granulocytes Imp3       |
| 1.82E-29 | -0.6802726 | 0.055 | 0.303 | 2.57E-25 | Granulocytes Hypk       |
| 1.89E-29 | -0.899541  | 0.434 | 0.726 | 2.67E-25 | Granulocytes H2afz      |
| 2.07E-29 | -0.7343955 | 0.072 | 0.328 | 2.92E-25 | Granulocytes Smarca5    |
| 2.17E-29 | -1.5093153 | 0.018 | 0.24  | 3.07E-25 | Granulocytes Ms4a6c     |
| 2.55E-29 | -2.0124279 | 0.016 | 0.235 | 3.62E-25 | Granulocytes Ebf1       |
| 2.57E-29 | -1.0317799 | 0.016 | 0.236 | 3.64E-25 | Granulocytes Cd247      |
| 2.70E-29 | -0.5590869 | 0.487 | 0.78  | 3.83E-25 | Granulocytes Cox4i1     |
| 2.80E-29 | -0.6148499 | 0.053 | 0.301 | 3.97E-25 | Granulocytes Mrps33     |
| 2.82E-29 | -0.7291271 | 0.051 | 0.295 | 3.99E-25 | Granulocytes Cox20      |
| 3.44E-29 | -0.5826168 | 0.182 | 0.496 | 4.87E-25 | Granulocytes Srp9       |
| 3.66E-29 | -0.3431754 | 0.223 | 0.558 | 5.18E-25 | Granulocytes Sap18      |
| 3.90E-29 | -0.6597584 | 0.147 | 0.443 | 5.51E-25 | Granulocytes Ube2s      |
| 4.35E-29 | -1.003499  | 0.137 | 0.409 | 6.16E-25 | Granulocytes Capg       |
| 5.01E-29 | 1.1895729  | 0.569 | 0.47  | 7.09E-25 | Granulocytes Gpsm3      |
| 5.19E-29 | -0.5931266 | 0.194 | 0.517 | 7.35E-25 | Granulocytes Ndufa6     |

|          |            |       |       |          |                          |
|----------|------------|-------|-------|----------|--------------------------|
| 5.36E-29 | 1.23762933 | 0.288 | 0.129 | 7.58E-25 | Granulocytes Sirpa       |
| 5.45E-29 | -0.7226667 | 0.1   | 0.372 | 7.72E-25 | Granulocytes Rbm25       |
| 6.18E-29 | 0.4676026  | 0.808 | 0.676 | 8.74E-25 | Granulocytes Gpx1        |
| 6.72E-29 | 1.20235237 | 0.233 | 0.091 | 9.52E-25 | Granulocytes Tmcc1       |
| 6.96E-29 | -0.7330462 | 0.039 | 0.271 | 9.85E-25 | Granulocytes Psmc5       |
| 7.32E-29 | -0.8535539 | 0.057 | 0.306 | 1.04E-24 | Granulocytes Ccnd2       |
| 7.75E-29 | -0.6245643 | 0.07  | 0.323 | 1.10E-24 | Granulocytes Ndufs4      |
| 9.00E-29 | -0.6510264 | 0.249 | 0.569 | 1.27E-24 | Granulocytes Cox6a1      |
| 1.05E-28 | -0.6694063 | 0.127 | 0.413 | 1.48E-24 | Granulocytes H2afv       |
| 1.11E-28 | -0.7390128 | 0.051 | 0.292 | 1.57E-24 | Granulocytes Srp19       |
| 1.12E-28 | -0.5792682 | 0.172 | 0.481 | 1.59E-24 | Granulocytes 1810037I17R |
| 1.26E-28 | -0.6929638 | 0.037 | 0.27  | 1.78E-24 | Granulocytes Ergic3      |
| 1.33E-28 | -0.8470282 | 0.035 | 0.265 | 1.88E-24 | Granulocytes Plekha2     |
| 1.46E-28 | -0.7367063 | 0.043 | 0.277 | 2.07E-24 | Granulocytes Cct4        |
| 1.47E-28 | -0.7719676 | 0.006 | 0.216 | 2.07E-24 | Granulocytes Phb         |
| 1.64E-28 | -0.647835  | 0.123 | 0.404 | 2.32E-24 | Granulocytes Hspa4       |
| 2.00E-28 | -0.6904446 | 0.104 | 0.37  | 2.83E-24 | Granulocytes Ywhae       |
| 2.22E-28 | -0.6270939 | 0.237 | 0.556 | 3.15E-24 | Granulocytes Atp5f1      |
| 2.30E-28 | -0.7684266 | 0.016 | 0.231 | 3.25E-24 | Granulocytes Mrps36      |
| 2.31E-28 | 1.33277276 | 0.397 | 0.238 | 3.28E-24 | Granulocytes AB124611    |
| 2.94E-28 | -0.610802  | 0.139 | 0.426 | 4.16E-24 | Granulocytes Raly        |
| 2.96E-28 | -0.7059479 | 0.053 | 0.293 | 4.19E-24 | Granulocytes Dcun1d5     |
| 2.99E-28 | -0.9274969 | 0.012 | 0.223 | 4.23E-24 | Granulocytes Pkig        |
| 3.10E-28 | -0.6768584 | 0.01  | 0.221 | 4.39E-24 | Granulocytes Stard3nl    |
| 3.67E-28 | -0.9652183 | 0.025 | 0.244 | 5.20E-24 | Granulocytes Ptp4a3      |
| 3.74E-28 | -0.7857241 | 0.004 | 0.21  | 5.29E-24 | Granulocytes Bin1        |
| 4.03E-28 | 1.27834813 | 0.217 | 0.082 | 5.70E-24 | Granulocytes Ogfrl1      |
| 4.18E-28 | 1.05160615 | 0.188 | 0.064 | 5.92E-24 | Granulocytes Msra        |
| 4.19E-28 | -0.6986888 | 0.043 | 0.274 | 5.93E-24 | Granulocytes Lsm6        |
| 4.52E-28 | -0.7301557 | 0.055 | 0.293 | 6.39E-24 | Granulocytes Canx        |
| 4.69E-28 | -0.6665415 | 0.035 | 0.26  | 6.63E-24 | Granulocytes Ndufa12     |
| 5.29E-28 | -1.050064  | 0.047 | 0.279 | 7.49E-24 | Granulocytes Bhlhe40     |
| 5.47E-28 | 1.16334134 | 0.593 | 0.461 | 7.74E-24 | Granulocytes Ctsd        |
| 6.28E-28 | -0.8668057 | 0.029 | 0.249 | 8.88E-24 | Granulocytes Rhoh        |
| 6.41E-28 | -0.7564101 | 0.016 | 0.227 | 9.07E-24 | Granulocytes Mrpl12      |
| 6.47E-28 | -0.6029712 | 0.067 | 0.317 | 9.15E-24 | Granulocytes Mrpl4       |
| 6.59E-28 | -0.5486908 | 0.096 | 0.365 | 9.33E-24 | Granulocytes Higd1a      |
| 7.01E-28 | -0.7058317 | 0.033 | 0.258 | 9.93E-24 | Granulocytes 1110004F10F |
| 7.65E-28 | -0.5726169 | 0.092 | 0.354 | 1.08E-23 | Granulocytes Dpm3        |
| 8.81E-28 | -0.6847229 | 0.098 | 0.361 | 1.25E-23 | Granulocytes Acin1       |
| 8.86E-28 | -0.8851324 | 0.025 | 0.24  | 1.25E-23 | Granulocytes Slc1a5      |
| 9.96E-28 | -0.6891061 | 0.037 | 0.266 | 1.41E-23 | Granulocytes Thrap3      |
| 1.05E-27 | -0.739601  | 0.029 | 0.248 | 1.48E-23 | Granulocytes Mrpl42      |
| 1.05E-27 | -0.6941736 | 0.022 | 0.239 | 1.48E-23 | Granulocytes Naa38       |
| 1.06E-27 | -0.9510313 | 0.031 | 0.248 | 1.50E-23 | Granulocytes Camk2d      |
| 1.07E-27 | 0.89576157 | 0.732 | 0.715 | 1.51E-23 | Granulocytes Pnrc1       |
| 1.27E-27 | -0.6171696 | 0.084 | 0.339 | 1.79E-23 | Granulocytes Rwdd1       |
| 1.43E-27 | -0.7783903 | 0.012 | 0.221 | 2.03E-23 | Granulocytes Sms         |

|          |            |       |       |          |                          |
|----------|------------|-------|-------|----------|--------------------------|
| 1.83E-27 | -0.6668847 | 0.051 | 0.286 | 2.60E-23 | Granulocytes Ddrgk1      |
| 1.89E-27 | -0.7789986 | 0.01  | 0.215 | 2.67E-23 | Granulocytes H2-M3       |
| 2.53E-27 | -0.7363513 | 0.02  | 0.231 | 3.59E-23 | Granulocytes Ak6         |
| 2.65E-27 | -0.760821  | 0.072 | 0.316 | 3.75E-23 | Granulocytes 4930523C07F |
| 2.77E-27 | -0.6700668 | 0.053 | 0.288 | 3.93E-23 | Granulocytes Ndufs8      |
| 3.51E-27 | -0.6020654 | 0.088 | 0.342 | 4.97E-23 | Granulocytes Lman2       |
| 3.54E-27 | -0.6579573 | 0.065 | 0.305 | 5.01E-23 | Granulocytes Eif6        |
| 3.61E-27 | -0.7336723 | 0.084 | 0.33  | 5.11E-23 | Granulocytes Hnrnph1     |
| 4.06E-27 | -0.5517211 | 0.106 | 0.375 | 5.75E-23 | Granulocytes Csnk1a1     |
| 4.63E-27 | -0.7279233 | 0.022 | 0.233 | 6.55E-23 | Granulocytes Rpn2        |
| 4.89E-27 | -0.7131945 | 0.047 | 0.275 | 6.92E-23 | Granulocytes Tram1       |
| 4.97E-27 | -0.8018012 | 0.02  | 0.23  | 7.03E-23 | Granulocytes Stip1       |
| 4.99E-27 | -0.6803291 | 0.119 | 0.384 | 7.06E-23 | Granulocytes Atp1b3      |
| 5.28E-27 | -0.8657115 | 0.049 | 0.277 | 7.48E-23 | Granulocytes Smad7       |
| 5.32E-27 | 1.11951989 | 0.198 | 0.072 | 7.53E-23 | Granulocytes Rnf11       |
| 5.61E-27 | -0.8245806 | 0.014 | 0.22  | 7.95E-23 | Granulocytes Ehd4        |
| 5.87E-27 | 1.23418378 | 0.587 | 0.47  | 8.31E-23 | Granulocytes Pde4b       |
| 6.48E-27 | -0.7354101 | 0.031 | 0.247 | 9.17E-23 | Granulocytes Nhp2        |
| 6.85E-27 | -0.7151013 | 0.049 | 0.28  | 9.70E-23 | Granulocytes Lbh         |
| 7.59E-27 | -1.3514015 | 0.016 | 0.222 | 1.07E-22 | Granulocytes H2-Ob       |
| 8.36E-27 | -0.7792711 | 0.006 | 0.204 | 1.18E-22 | Granulocytes Fyn         |
| 8.78E-27 | -0.6759792 | 0.02  | 0.229 | 1.24E-22 | Granulocytes Pfdn1       |
| 9.25E-27 | -0.6810967 | 0.035 | 0.254 | 1.31E-22 | Granulocytes Mtch2       |
| 9.31E-27 | -0.7122658 | 0.014 | 0.217 | 1.32E-22 | Granulocytes Nubp1       |
| 1.10E-26 | -0.617553  | 0.151 | 0.436 | 1.55E-22 | Granulocytes Psmb5       |
| 1.16E-26 | -0.7146636 | 0.016 | 0.22  | 1.64E-22 | Granulocytes Exosc8      |
| 1.17E-26 | -0.7566452 | 0.02  | 0.225 | 1.66E-22 | Granulocytes Dnajc2      |
| 1.29E-26 | -0.7941476 | 0.049 | 0.274 | 1.82E-22 | Granulocytes Snx2        |
| 1.29E-26 | -0.9456697 | 0.016 | 0.219 | 1.83E-22 | Granulocytes Foxo1       |
| 1.46E-26 | -0.9110902 | 0.016 | 0.22  | 2.06E-22 | Granulocytes Bcl2        |
| 1.58E-26 | -0.6533118 | 0.025 | 0.234 | 2.24E-22 | Granulocytes Ndufa10     |
| 1.70E-26 | -0.7468602 | 0.051 | 0.279 | 2.40E-22 | Granulocytes Vgll4       |
| 1.82E-26 | -0.7011299 | 0.029 | 0.242 | 2.58E-22 | Granulocytes Med10       |
| 1.89E-26 | -0.6203418 | 0.098 | 0.356 | 2.67E-22 | Granulocytes Mtdh        |
| 1.90E-26 | -0.6770377 | 0.016 | 0.221 | 2.69E-22 | Granulocytes Impdh2      |
| 1.95E-26 | -0.5847177 | 0.082 | 0.329 | 2.76E-22 | Granulocytes Ptges3      |
| 2.03E-26 | 1.15694592 | 0.438 | 0.27  | 2.88E-22 | Granulocytes Fgl2        |
| 2.07E-26 | -2.2713229 | 0.022 | 0.226 | 2.92E-22 | Granulocytes Ly6d        |
| 2.17E-26 | -0.7476691 | 0.027 | 0.237 | 3.08E-22 | Granulocytes U2surp      |
| 2.23E-26 | -0.8210187 | 0.037 | 0.255 | 3.15E-22 | Granulocytes H2afx       |
| 2.30E-26 | -0.7085157 | 0.061 | 0.292 | 3.25E-22 | Granulocytes Ppig        |
| 2.37E-26 | -0.6860675 | 0.057 | 0.286 | 3.36E-22 | Granulocytes Cyb5a       |
| 2.39E-26 | -0.7446637 | 0.018 | 0.224 | 3.39E-22 | Granulocytes Eif4g1      |
| 2.46E-26 | -0.7101333 | 0.051 | 0.279 | 3.48E-22 | Granulocytes Tob2        |
| 2.90E-26 | -0.6030514 | 0.053 | 0.284 | 4.10E-22 | Granulocytes Phf5a       |
| 2.95E-26 | -0.7623007 | 0.02  | 0.227 | 4.18E-22 | Granulocytes Nop56       |
| 3.22E-26 | -0.6748034 | 0.018 | 0.223 | 4.56E-22 | Granulocytes Adh5        |
| 3.26E-26 | -0.6415628 | 0.047 | 0.268 | 4.61E-22 | Granulocytes Adrm1       |

|          |            |       |       |          |                       |
|----------|------------|-------|-------|----------|-----------------------|
| 3.33E-26 | -0.5206533 | 0.188 | 0.489 | 4.72E-22 | Granulocytes Snx3     |
| 3.85E-26 | -0.7974014 | 0.055 | 0.282 | 5.45E-22 | Granulocytes Clic4    |
| 3.91E-26 | -0.6375471 | 0.057 | 0.287 | 5.54E-22 | Granulocytes Arpc5l   |
| 4.07E-26 | -0.8375523 | 0.027 | 0.233 | 5.76E-22 | Granulocytes Fubp1    |
| 4.19E-26 | -0.7872853 | 0.016 | 0.218 | 5.93E-22 | Granulocytes Got1     |
| 4.47E-26 | -0.6848243 | 0.018 | 0.221 | 6.32E-22 | Granulocytes Cct3     |
| 4.48E-26 | -0.6287653 | 0.043 | 0.262 | 6.34E-22 | Granulocytes Emc6     |
| 4.56E-26 | -0.7541668 | 0.012 | 0.212 | 6.45E-22 | Granulocytes Cnp      |
| 4.68E-26 | -0.4716202 | 0.157 | 0.449 | 6.63E-22 | Granulocytes Aup1     |
| 4.80E-26 | -1.2257024 | 0.119 | 0.362 | 6.79E-22 | Granulocytes Plac8    |
| 4.94E-26 | -0.7335261 | 0.047 | 0.269 | 7.00E-22 | Granulocytes Apobec3  |
| 5.48E-26 | -0.580692  | 0.057 | 0.287 | 7.76E-22 | Granulocytes Eif4e2   |
| 6.08E-26 | -0.7246858 | 0.045 | 0.265 | 8.61E-22 | Granulocytes Taf1d    |
| 7.62E-26 | -0.5745753 | 0.09  | 0.339 | 1.08E-21 | Granulocytes Ndufb6   |
| 8.13E-26 | -0.7165908 | 0.051 | 0.272 | 1.15E-21 | Granulocytes Mrpl18   |
| 8.16E-26 | 1.03215765 | 0.194 | 0.069 | 1.15E-21 | Granulocytes Gm9733   |
| 8.41E-26 | -0.7453712 | 0.022 | 0.227 | 1.19E-21 | Granulocytes Srpk1    |
| 8.87E-26 | -0.7186834 | 0.027 | 0.233 | 1.26E-21 | Granulocytes Gm9844   |
| 1.06E-25 | -0.7727776 | 0.008 | 0.202 | 1.50E-21 | Granulocytes Pld3     |
| 1.15E-25 | -0.6392817 | 0.237 | 0.543 | 1.63E-21 | Granulocytes Reep5    |
| 1.23E-25 | -0.6402944 | 0.022 | 0.227 | 1.75E-21 | Granulocytes Timm17a  |
| 1.29E-25 | -0.7109071 | 0.053 | 0.276 | 1.82E-21 | Granulocytes Tbcx     |
| 1.37E-25 | -1.3432916 | 0.016 | 0.215 | 1.95E-21 | Granulocytes Ctla2a   |
| 1.48E-25 | -0.8797633 | 0.018 | 0.216 | 2.09E-21 | Granulocytes Chd3     |
| 1.49E-25 | -0.6648339 | 0.006 | 0.197 | 2.11E-21 | Granulocytes Eif2s1   |
| 1.51E-25 | -0.546683  | 0.115 | 0.38  | 2.14E-21 | Granulocytes Polr2l   |
| 1.61E-25 | -0.5965204 | 0.059 | 0.289 | 2.28E-21 | Granulocytes Eif4a3   |
| 1.67E-25 | -0.5359036 | 0.108 | 0.369 | 2.36E-21 | Granulocytes Bcap31   |
| 1.75E-25 | -0.6216215 | 0.02  | 0.22  | 2.48E-21 | Granulocytes Snrpb2   |
| 1.75E-25 | 0.92123367 | 0.1   | 0.022 | 2.48E-21 | Granulocytes Tnfrsf23 |
| 1.78E-25 | -0.8734411 | 0.112 | 0.359 | 2.53E-21 | Granulocytes Tpi1     |
| 1.81E-25 | -0.5756685 | 0.08  | 0.323 | 2.57E-21 | Granulocytes Psma6    |
| 1.87E-25 | -0.5343918 | 0.701 | 0.89  | 2.65E-21 | Granulocytes Oaz1     |
| 1.91E-25 | -0.5782573 | 0.076 | 0.31  | 2.71E-21 | Granulocytes Zc3h15   |
| 1.93E-25 | -0.6724474 | 0.016 | 0.212 | 2.73E-21 | Granulocytes Mrpl28   |
| 1.96E-25 | 0.87572999 | 0.153 | 0.048 | 2.77E-21 | Granulocytes Bst1     |
| 2.04E-25 | -1.6226338 | 0.01  | 0.201 | 2.89E-21 | Granulocytes Ifng     |
| 2.30E-25 | -0.6028344 | 0.153 | 0.434 | 3.26E-21 | Granulocytes Rps27rt  |
| 2.58E-25 | -0.8292352 | 0.014 | 0.207 | 3.66E-21 | Granulocytes Sdf2l1   |
| 2.68E-25 | -0.5502375 | 0.057 | 0.285 | 3.79E-21 | Granulocytes Ndufb3   |
| 2.69E-25 | -0.7569191 | 0.02  | 0.218 | 3.81E-21 | Granulocytes Dnajc9   |
| 2.75E-25 | -1.2196784 | 0.02  | 0.216 | 3.90E-21 | Granulocytes S1pr1    |
| 2.79E-25 | -0.7140507 | 0.016 | 0.214 | 3.95E-21 | Granulocytes Lat2     |
| 3.08E-25 | -0.6482151 | 0.014 | 0.209 | 4.36E-21 | Granulocytes Bccip    |
| 3.56E-25 | -0.6353315 | 0.137 | 0.401 | 5.04E-21 | Granulocytes Laptm4a  |
| 3.94E-25 | -0.6300077 | 0.01  | 0.202 | 5.57E-21 | Granulocytes Ddt      |
| 4.28E-25 | -0.5374265 | 0.084 | 0.327 | 6.06E-21 | Granulocytes Rnf187   |
| 4.52E-25 | 1.33818037 | 0.423 | 0.289 | 6.40E-21 | Granulocytes Fam32a   |

|          |            |       |       |          |                       |
|----------|------------|-------|-------|----------|-----------------------|
| 4.91E-25 | 1.24300511 | 0.268 | 0.126 | 6.95E-21 | Granulocytes Fem1c    |
| 4.97E-25 | -0.5058957 | 0.076 | 0.313 | 7.03E-21 | Granulocytes Zcrb1    |
| 5.18E-25 | -0.8266513 | 0.018 | 0.213 | 7.34E-21 | Granulocytes Spn      |
| 5.59E-25 | -0.6832882 | 0.053 | 0.272 | 7.92E-21 | Granulocytes Itgb7    |
| 5.62E-25 | 1.26745066 | 0.442 | 0.296 | 7.95E-21 | Granulocytes Gpcpd1   |
| 5.66E-25 | -0.7584289 | 0.055 | 0.277 | 8.02E-21 | Granulocytes Socs1    |
| 5.72E-25 | 2.50583352 | 0.292 | 0.149 | 8.10E-21 | Granulocytes Ccrl2    |
| 6.35E-25 | -0.5198823 | 0.198 | 0.481 | 8.99E-21 | Granulocytes Kmt2e    |
| 6.37E-25 | -1.3326042 | 0.002 | 0.186 | 9.02E-21 | Granulocytes Prf1     |
| 8.35E-25 | -0.9643449 | 0.1   | 0.329 | 1.18E-20 | Granulocytes Ctsh     |
| 8.41E-25 | -0.6534911 | 0.039 | 0.245 | 1.19E-20 | Granulocytes Chrac1   |
| 8.69E-25 | -0.9599979 | 0.027 | 0.224 | 1.23E-20 | Granulocytes Ms4a4c   |
| 8.76E-25 | -0.7429741 | 0.055 | 0.27  | 1.24E-20 | Granulocytes Bclaf1   |
| 9.99E-25 | -0.5344297 | 0.16  | 0.434 | 1.41E-20 | Granulocytes Smdt1    |
| 1.01E-24 | -1.0289048 | 0.012 | 0.201 | 1.42E-20 | Granulocytes Tubb2a   |
| 1.02E-24 | -0.64241   | 0.018 | 0.212 | 1.45E-20 | Granulocytes Cfdp1    |
| 1.09E-24 | -0.6692317 | 0.01  | 0.198 | 1.55E-20 | Granulocytes Polr2d   |
| 1.17E-24 | -0.5220557 | 0.211 | 0.507 | 1.65E-20 | Granulocytes Ndufa2   |
| 1.31E-24 | -0.5034498 | 0.258 | 0.58  | 1.85E-20 | Granulocytes Srrm2    |
| 1.34E-24 | -0.5978097 | 0.035 | 0.244 | 1.89E-20 | Granulocytes Abcf1    |
| 1.44E-24 | -0.794971  | 0.012 | 0.199 | 2.03E-20 | Granulocytes Grap     |
| 1.44E-24 | -0.8661819 | 0.08  | 0.307 | 2.04E-20 | Granulocytes Bcl2a1d  |
| 1.51E-24 | -0.521975  | 0.123 | 0.378 | 2.14E-20 | Granulocytes Atpif1   |
| 1.54E-24 | -0.6290906 | 0.039 | 0.248 | 2.18E-20 | Granulocytes Rassf1   |
| 1.55E-24 | -0.5065588 | 0.067 | 0.294 | 2.20E-20 | Granulocytes Rnf7     |
| 1.56E-24 | -0.6451869 | 0.037 | 0.241 | 2.20E-20 | Granulocytes Eif3g    |
| 1.57E-24 | -0.5854915 | 0.106 | 0.356 | 2.23E-20 | Granulocytes Glud1    |
| 1.63E-24 | 1.31759246 | 0.389 | 0.247 | 2.31E-20 | Granulocytes Atg3     |
| 1.66E-24 | 1.28687138 | 0.309 | 0.162 | 2.35E-20 | Granulocytes Lrrc25   |
| 1.71E-24 | -0.7133789 | 0.02  | 0.214 | 2.42E-20 | Granulocytes Evl      |
| 1.83E-24 | -0.6441128 | 0.041 | 0.251 | 2.59E-20 | Granulocytes Fam173a  |
| 1.87E-24 | -0.625455  | 0.342 | 0.635 | 2.65E-20 | Granulocytes Ldha     |
| 1.98E-24 | 1.2766559  | 0.245 | 0.103 | 2.80E-20 | Granulocytes Ifitm6   |
| 1.98E-24 | -0.592727  | 0.025 | 0.222 | 2.81E-20 | Granulocytes Nutf2    |
| 2.01E-24 | -0.550187  | 0.102 | 0.347 | 2.85E-20 | Granulocytes Epsti1   |
| 2.07E-24 | -0.5444056 | 0.102 | 0.342 | 2.92E-20 | Granulocytes Anapc11  |
| 2.17E-24 | -0.6597733 | 0.037 | 0.239 | 3.07E-20 | Granulocytes Psmc7    |
| 2.24E-24 | 0.97753601 | 0.188 | 0.069 | 3.17E-20 | Granulocytes St3gal6  |
| 2.24E-24 | -0.537854  | 0.055 | 0.272 | 3.17E-20 | Granulocytes Polr2e   |
| 2.36E-24 | -0.6142177 | 0.055 | 0.273 | 3.34E-20 | Granulocytes Gimp     |
| 2.44E-24 | 1.12724932 | 0.133 | 0.038 | 3.46E-20 | Granulocytes Rsad2    |
| 2.61E-24 | -0.5684038 | 0.045 | 0.254 | 3.69E-20 | Granulocytes Psmc4    |
| 2.82E-24 | -0.489448  | 0.082 | 0.318 | 3.99E-20 | Granulocytes Anxa6    |
| 2.94E-24 | 1.28466225 | 0.276 | 0.135 | 4.17E-20 | Granulocytes Svil     |
| 3.42E-24 | -0.5241294 | 0.1   | 0.343 | 4.85E-20 | Granulocytes Gtf2b    |
| 3.50E-24 | -0.6551223 | 0.061 | 0.281 | 4.95E-20 | Granulocytes Cdc42se2 |
| 3.51E-24 | -0.6215147 | 0.092 | 0.327 | 4.98E-20 | Granulocytes Ewsr1    |
| 3.76E-24 | -0.6154919 | 0.043 | 0.251 | 5.32E-20 | Granulocytes Pdap1    |

|          |            |       |       |          |                        |
|----------|------------|-------|-------|----------|------------------------|
| 3.85E-24 | -0.6229275 | 0.082 | 0.312 | 5.45E-20 | Granulocytes G3bp2     |
| 3.88E-24 | -0.6359429 | 0.027 | 0.224 | 5.49E-20 | Granulocytes Cdk4      |
| 3.88E-24 | -0.8211628 | 0.382 | 0.656 | 5.50E-20 | Granulocytes Vim       |
| 3.90E-24 | -0.5451984 | 0.078 | 0.308 | 5.52E-20 | Granulocytes Eif3j1    |
| 4.38E-24 | -0.6455947 | 0.02  | 0.211 | 6.21E-20 | Granulocytes Mrpl15    |
| 4.48E-24 | -0.6697838 | 0.018 | 0.208 | 6.35E-20 | Granulocytes Tcof1     |
| 4.52E-24 | -0.5263034 | 0.323 | 0.641 | 6.40E-20 | Granulocytes Clta      |
| 4.63E-24 | -0.497384  | 0.254 | 0.558 | 6.56E-20 | Granulocytes Sqstm1    |
| 4.68E-24 | -0.7714278 | 0.027 | 0.221 | 6.62E-20 | Granulocytes Mxd4      |
| 5.16E-24 | -0.5281735 | 0.053 | 0.27  | 7.30E-20 | Granulocytes Grpel1    |
| 5.30E-24 | -0.5781603 | 0.059 | 0.278 | 7.50E-20 | Granulocytes Hpvt      |
| 5.36E-24 | -0.9367453 | 0.01  | 0.193 | 7.58E-20 | Granulocytes Serpina3g |
| 5.49E-24 | -0.5554865 | 0.043 | 0.249 | 7.77E-20 | Granulocytes Ube2k     |
| 5.50E-24 | -0.5946674 | 0.025 | 0.218 | 7.78E-20 | Granulocytes Eif3d     |
| 5.55E-24 | -0.5292312 | 0.057 | 0.274 | 7.86E-20 | Granulocytes Kxd1      |
| 5.56E-24 | -0.5007278 | 0.202 | 0.501 | 7.87E-20 | Granulocytes Rbx1      |
| 5.65E-24 | 1.3448189  | 0.346 | 0.204 | 8.00E-20 | Granulocytes R3hdm4    |
| 6.33E-24 | -0.5757837 | 0.047 | 0.259 | 8.96E-20 | Granulocytes Ccdc59    |
| 6.34E-24 | -0.3909519 | 0.08  | 0.317 | 8.97E-20 | Granulocytes Ube2n     |
| 6.36E-24 | -0.5818125 | 0.033 | 0.231 | 9.00E-20 | Granulocytes Tomm5     |
| 6.67E-24 | -0.6534221 | 0.014 | 0.199 | 9.45E-20 | Granulocytes Al662270  |
| 7.63E-24 | -0.6163354 | 0.01  | 0.193 | 1.08E-19 | Granulocytes Mrps26    |
| 7.67E-24 | 1.392576   | 0.423 | 0.295 | 1.09E-19 | Granulocytes Rab7      |
| 7.91E-24 | -0.5740646 | 0.096 | 0.333 | 1.12E-19 | Granulocytes Gng10     |
| 7.98E-24 | -0.6730411 | 0.022 | 0.211 | 1.13E-19 | Granulocytes Mrps7     |
| 8.02E-24 | -0.5370893 | 0.063 | 0.283 | 1.14E-19 | Granulocytes Lsm12     |
| 8.02E-24 | 0.93274178 | 0.174 | 0.061 | 1.14E-19 | Granulocytes Iqsec1    |
| 8.09E-24 | -0.6592552 | 0.004 | 0.182 | 1.15E-19 | Granulocytes Nucks1    |
| 8.54E-24 | -0.5453921 | 0.157 | 0.423 | 1.21E-19 | Granulocytes Capns1    |
| 8.69E-24 | -0.6381103 | 0.055 | 0.268 | 1.23E-19 | Granulocytes Tacc1     |
| 9.21E-24 | -0.5825165 | 0.037 | 0.238 | 1.30E-19 | Granulocytes Psm11     |
| 9.39E-24 | -0.665868  | 0.051 | 0.26  | 1.33E-19 | Granulocytes Lsm8      |
| 9.97E-24 | -0.7517649 | 0.022 | 0.211 | 1.41E-19 | Granulocytes Slc38a1   |
| 1.03E-23 | -0.6174185 | 0.016 | 0.204 | 1.46E-19 | Granulocytes Nsf1c     |
| 1.08E-23 | -0.6635    | 0.033 | 0.229 | 1.53E-19 | Granulocytes Fkbp4     |
| 1.09E-23 | -0.5340163 | 0.072 | 0.293 | 1.54E-19 | Granulocytes Ufc1      |
| 1.09E-23 | -0.6111661 | 0.016 | 0.202 | 1.55E-19 | Granulocytes Emc4      |
| 1.18E-23 | -0.5507678 | 0.141 | 0.397 | 1.67E-19 | Granulocytes Srrm1     |
| 1.32E-23 | -0.5757701 | 0.084 | 0.309 | 1.87E-19 | Granulocytes Rab10     |
| 1.40E-23 | -0.6601591 | 0.055 | 0.265 | 1.98E-19 | Granulocytes Nfkbib    |
| 1.41E-23 | 0.89658127 | 0.141 | 0.043 | 1.99E-19 | Granulocytes Cpd       |
| 1.41E-23 | -0.4501909 | 0.133 | 0.392 | 2.00E-19 | Granulocytes Tmem234   |
| 1.43E-23 | -0.5510398 | 0.065 | 0.282 | 2.02E-19 | Granulocytes Polr2k    |
| 1.43E-23 | -0.590983  | 0.049 | 0.256 | 2.03E-19 | Granulocytes Vdac3     |
| 1.46E-23 | -0.6560468 | 0.016 | 0.202 | 2.07E-19 | Granulocytes Trp53     |
| 1.46E-23 | -0.4694214 | 0.098 | 0.338 | 2.07E-19 | Granulocytes Psm14     |
| 1.61E-23 | 1.21862761 | 0.423 | 0.286 | 2.28E-19 | Granulocytes Plp2      |
| 1.63E-23 | -0.5410923 | 0.051 | 0.258 | 2.31E-19 | Granulocytes Rpp21     |

|          |            |       |       |          |                       |
|----------|------------|-------|-------|----------|-----------------------|
| 1.73E-23 | -0.5778468 | 0.084 | 0.314 | 2.44E-19 | Granulocytes Birc6    |
| 1.75E-23 | -0.7318485 | 0.006 | 0.184 | 2.47E-19 | Granulocytes Lgals3bp |
| 2.07E-23 | -0.5387874 | 0.037 | 0.236 | 2.93E-19 | Granulocytes Polr2f   |
| 2.16E-23 | -0.6961305 | 0.02  | 0.208 | 3.06E-19 | Granulocytes Snrnp48  |
| 2.25E-23 | -0.5869616 | 0.057 | 0.269 | 3.18E-19 | Granulocytes Etfb     |
| 2.26E-23 | -0.5026637 | 0.051 | 0.259 | 3.19E-19 | Granulocytes Jtb      |
| 2.33E-23 | 0.91957534 | 0.634 | 0.561 | 3.29E-19 | Granulocytes Gnai2    |
| 2.57E-23 | -0.456504  | 0.123 | 0.368 | 3.64E-19 | Granulocytes Ndufb4   |
| 2.65E-23 | -0.5207865 | 0.045 | 0.251 | 3.75E-19 | Granulocytes Rnps1    |
| 2.88E-23 | -0.6358312 | 0.1   | 0.33  | 4.08E-19 | Granulocytes Ech1     |
| 2.93E-23 | -0.649376  | 0.031 | 0.222 | 4.14E-19 | Granulocytes Mrpl21   |
| 3.01E-23 | -0.6918077 | 0.149 | 0.404 | 4.26E-19 | Granulocytes Itga4    |
| 3.25E-23 | -0.5565344 | 0.115 | 0.354 | 4.60E-19 | Granulocytes Gna13    |
| 3.36E-23 | -0.6025152 | 0.031 | 0.222 | 4.75E-19 | Granulocytes Chchd1   |
| 3.51E-23 | 0.8426804  | 0.141 | 0.044 | 4.97E-19 | Granulocytes Il13ra1  |
| 3.71E-23 | -0.9862172 | 0.014 | 0.194 | 5.25E-19 | Granulocytes Tox      |
| 3.75E-23 | -0.5791038 | 0.055 | 0.263 | 5.31E-19 | Granulocytes Snw1     |
| 3.84E-23 | -0.5245089 | 0.18  | 0.451 | 5.44E-19 | Granulocytes Csnk2b   |
| 3.90E-23 | -0.5295678 | 0.272 | 0.572 | 5.52E-19 | Granulocytes Tagln2   |
| 4.01E-23 | -1.0507976 | 0.018 | 0.202 | 5.68E-19 | Granulocytes Stmn1    |
| 4.17E-23 | -1.3834608 | 0.01  | 0.188 | 5.90E-19 | Granulocytes Cd7      |
| 4.35E-23 | -0.6503188 | 0.016 | 0.197 | 6.15E-19 | Granulocytes Bscl2    |
| 4.35E-23 | -0.5901594 | 0.051 | 0.256 | 6.16E-19 | Granulocytes Commd3   |
| 4.65E-23 | 1.17705332 | 0.227 | 0.1   | 6.59E-19 | Granulocytes Gla      |
| 4.99E-23 | -0.9822979 | 0.219 | 0.474 | 7.06E-19 | Granulocytes Jun      |
| 5.01E-23 | -0.7688333 | 0.012 | 0.19  | 7.10E-19 | Granulocytes Nrip1    |
| 5.25E-23 | -3.4835711 | 0.022 | 0.204 | 7.43E-19 | Granulocytes Gzma     |
| 5.27E-23 | -0.6133002 | 0.033 | 0.225 | 7.46E-19 | Granulocytes Hdgf     |
| 5.31E-23 | -0.5814471 | 0.041 | 0.241 | 7.52E-19 | Granulocytes G3bp1    |
| 5.34E-23 | 0.68968949 | 0.11  | 0.029 | 7.56E-19 | Granulocytes Mtus1    |
| 5.44E-23 | -0.752714  | 0.012 | 0.191 | 7.69E-19 | Granulocytes Pkp3     |
| 5.55E-23 | -0.657431  | 0.012 | 0.192 | 7.85E-19 | Granulocytes Btg3     |
| 5.70E-23 | -0.5506939 | 0.045 | 0.247 | 8.06E-19 | Granulocytes Ntan1    |
| 5.85E-23 | -0.8272441 | 0.145 | 0.384 | 8.28E-19 | Granulocytes Ptms     |
| 5.87E-23 | -0.7926249 | 0.112 | 0.342 | 8.31E-19 | Granulocytes Lamp1    |
| 6.21E-23 | -0.5769576 | 0.084 | 0.312 | 8.79E-19 | Granulocytes Pold4    |
| 6.26E-23 | -0.5737664 | 0.016 | 0.198 | 8.86E-19 | Granulocytes Psmc1    |
| 6.27E-23 | -0.5661899 | 0.049 | 0.253 | 8.88E-19 | Granulocytes Srsf10   |
| 6.39E-23 | -0.7847094 | 0.01  | 0.184 | 9.05E-19 | Granulocytes Pde7a    |
| 6.63E-23 | -0.5168109 | 0.157 | 0.418 | 9.39E-19 | Granulocytes Ywhab    |
| 6.66E-23 | -0.7699631 | 0.037 | 0.228 | 9.43E-19 | Granulocytes Hexb     |
| 7.16E-23 | -0.5394505 | 0.037 | 0.233 | 1.01E-18 | Granulocytes Cdc5l    |
| 8.13E-23 | -0.6277261 | 0.022 | 0.205 | 1.15E-18 | Granulocytes Ssrp1    |
| 8.21E-23 | -0.8921798 | 0.018 | 0.199 | 1.16E-18 | Granulocytes Gramd3   |
| 8.26E-23 | -0.718625  | 0.035 | 0.227 | 1.17E-18 | Granulocytes Rgs10    |
| 8.30E-23 | -0.5753205 | 0.029 | 0.217 | 1.17E-18 | Granulocytes Hnrnpa0  |
| 8.44E-23 | -0.5861749 | 0.086 | 0.309 | 1.20E-18 | Granulocytes Snrnp70  |
| 8.67E-23 | -0.5489925 | 0.057 | 0.267 | 1.23E-18 | Granulocytes Rtf1     |

|          |            |       |       |          |                       |
|----------|------------|-------|-------|----------|-----------------------|
| 8.80E-23 | -1.2607921 | 0.033 | 0.219 | 1.25E-18 | Granulocytes Lgmn     |
| 8.91E-23 | -0.6111587 | 0.029 | 0.217 | 1.26E-18 | Granulocytes Sptssa   |
| 1.00E-22 | -0.5757309 | 0.043 | 0.242 | 1.42E-18 | Granulocytes Scamp3   |
| 1.03E-22 | -0.4327417 | 0.268 | 0.564 | 1.46E-18 | Granulocytes Eif4a1   |
| 1.05E-22 | -0.6590038 | 0.115 | 0.35  | 1.49E-18 | Granulocytes Cited2   |
| 1.20E-22 | -0.7872452 | 0.008 | 0.18  | 1.70E-18 | Granulocytes Gtf2i    |
| 1.29E-22 | -0.6851794 | 0.02  | 0.201 | 1.83E-18 | Granulocytes Gnptg    |
| 1.34E-22 | -0.6299547 | 0.008 | 0.181 | 1.90E-18 | Granulocytes Rsl1d1   |
| 1.38E-22 | -0.6003636 | 0.108 | 0.344 | 1.95E-18 | Granulocytes Pnp      |
| 1.38E-22 | -0.8578046 | 0.031 | 0.216 | 1.96E-18 | Granulocytes Pou2f2   |
| 1.40E-22 | 1.45921354 | 0.282 | 0.146 | 1.99E-18 | Granulocytes Fbxl5    |
| 1.45E-22 | -0.493352  | 0.022 | 0.208 | 2.05E-18 | Granulocytes Etfa     |
| 1.47E-22 | 1.01691857 | 0.168 | 0.061 | 2.08E-18 | Granulocytes Slc2a6   |
| 1.47E-22 | -0.5750428 | 0.055 | 0.26  | 2.08E-18 | Granulocytes Tm2d2    |
| 1.49E-22 | -0.5798723 | 0.025 | 0.209 | 2.10E-18 | Granulocytes Fkbp2    |
| 1.50E-22 | -0.3810187 | 0.151 | 0.414 | 2.13E-18 | Granulocytes Sf3b5    |
| 1.66E-22 | -0.7048365 | 0.035 | 0.225 | 2.34E-18 | Granulocytes 6-Sep    |
| 1.86E-22 | -0.6809659 | 0.025 | 0.206 | 2.63E-18 | Granulocytes Chordc1  |
| 1.90E-22 | -0.6305731 | 0.018 | 0.197 | 2.68E-18 | Granulocytes Rbbp7    |
| 1.96E-22 | -0.5329918 | 0.02  | 0.201 | 2.78E-18 | Granulocytes Psmc2    |
| 1.98E-22 | 0.93468557 | 0.597 | 0.534 | 2.80E-18 | Granulocytes Iqgap1   |
| 2.01E-22 | -0.7849903 | 0.008 | 0.18  | 2.84E-18 | Granulocytes Zap70    |
| 2.02E-22 | -0.5113186 | 0.033 | 0.224 | 2.86E-18 | Granulocytes Hsd17b10 |
| 2.03E-22 | -0.5505742 | 0.051 | 0.254 | 2.88E-18 | Granulocytes Ebp      |
| 2.08E-22 | -0.5367121 | 0.012 | 0.187 | 2.94E-18 | Granulocytes Cmc1     |
| 2.09E-22 | -0.7378295 | 0.037 | 0.229 | 2.96E-18 | Granulocytes Ifi47    |
| 2.09E-22 | -0.5410226 | 0.076 | 0.293 | 2.96E-18 | Granulocytes Puf60    |
| 2.29E-22 | -0.6269996 | 0.025 | 0.211 | 3.24E-18 | Granulocytes Abhd17b  |
| 2.30E-22 | -0.5083361 | 0.125 | 0.365 | 3.26E-18 | Granulocytes Tmem167  |
| 2.32E-22 | -0.4573836 | 0.035 | 0.229 | 3.28E-18 | Granulocytes Thoc7    |
| 2.56E-22 | -0.549966  | 0.037 | 0.229 | 3.62E-18 | Granulocytes Mcts1    |
| 2.58E-22 | -0.494821  | 0.063 | 0.276 | 3.65E-18 | Granulocytes Ifi35    |
| 2.59E-22 | -0.6329411 | 0.01  | 0.184 | 3.67E-18 | Granulocytes Nop58    |
| 2.63E-22 | -0.6948083 | 0.055 | 0.254 | 3.73E-18 | Granulocytes Smc4     |
| 2.65E-22 | -0.4468858 | 0.174 | 0.445 | 3.75E-18 | Granulocytes Uqcr10   |
| 2.97E-22 | -0.5021647 | 0.067 | 0.278 | 4.20E-18 | Granulocytes Ywhag    |
| 3.01E-22 | -0.5152848 | 0.084 | 0.303 | 4.26E-18 | Granulocytes Gch1     |
| 3.08E-22 | -0.7121049 | 0.035 | 0.224 | 4.36E-18 | Granulocytes Top2b    |
| 3.29E-22 | -0.4770863 | 0.123 | 0.365 | 4.66E-18 | Granulocytes Psma1    |
| 3.50E-22 | -0.5051308 | 0.067 | 0.279 | 4.95E-18 | Granulocytes Tmem128  |
| 3.64E-22 | -0.5529725 | 0.057 | 0.26  | 5.16E-18 | Granulocytes Stub1    |
| 3.74E-22 | -0.4643214 | 0.057 | 0.263 | 5.30E-18 | Granulocytes Nono     |
| 3.94E-22 | -0.5592227 | 0.004 | 0.172 | 5.57E-18 | Granulocytes Alg5     |
| 4.35E-22 | -0.6223079 | 0.029 | 0.21  | 6.16E-18 | Granulocytes Cetn2    |
| 4.97E-22 | -0.7996313 | 0.027 | 0.208 | 7.03E-18 | Granulocytes Sptbn1   |
| 5.08E-22 | -1.0730269 | 0.008 | 0.177 | 7.19E-18 | Granulocytes Tnfrsf9  |
| 5.15E-22 | -0.514968  | 0.08  | 0.296 | 7.29E-18 | Granulocytes Rrp1     |
| 5.18E-22 | -0.4868255 | 0.342 | 0.654 | 7.34E-18 | Granulocytes Ppp1ca   |



|          |            |       |       |          |                       |
|----------|------------|-------|-------|----------|-----------------------|
| 5.73E-22 | -0.5331513 | 0.086 | 0.305 | 8.12E-18 | Granulocytes Slbp     |
| 5.75E-22 | 1.21793672 | 0.211 | 0.09  | 8.15E-18 | Granulocytes Rab20    |
| 6.26E-22 | -0.5623847 | 0.029 | 0.212 | 8.87E-18 | Granulocytes Exosc3   |
| 6.27E-22 | -0.7841342 | 0.012 | 0.183 | 8.88E-18 | Granulocytes AU020206 |
| 6.63E-22 | -0.5880252 | 0.033 | 0.218 | 9.39E-18 | Granulocytes Babam1   |
| 6.63E-22 | -0.8668877 | 0.481 | 0.738 | 9.39E-18 | Granulocytes AY036118 |
| 6.76E-22 | 0.93621175 | 0.129 | 0.039 | 9.57E-18 | Granulocytes Oas3     |
| 6.86E-22 | -0.4980183 | 0.112 | 0.342 | 9.71E-18 | Granulocytes Ap2s1    |
| 7.21E-22 | -0.7910983 | 0.065 | 0.269 | 1.02E-17 | Granulocytes Glul     |
| 7.34E-22 | -0.5365115 | 0.02  | 0.196 | 1.04E-17 | Granulocytes Psmid6   |
| 7.39E-22 | -0.3776495 | 0.209 | 0.495 | 1.05E-17 | Granulocytes Arpp19   |
| 7.42E-22 | -1.4270288 | 0.016 | 0.187 | 1.05E-17 | Granulocytes Fcmr     |
| 7.52E-22 | -0.5778024 | 0.043 | 0.235 | 1.06E-17 | Granulocytes Caprin1  |
| 7.73E-22 | -0.7988182 | 0.01  | 0.178 | 1.09E-17 | Granulocytes Ccr5     |
| 7.80E-22 | -0.613025  | 0.041 | 0.232 | 1.10E-17 | Granulocytes Dhx15    |
| 7.87E-22 | -0.4347788 | 0.088 | 0.314 | 1.11E-17 | Granulocytes Txndc17  |
| 8.48E-22 | -0.488299  | 0.135 | 0.377 | 1.20E-17 | Granulocytes 7-Sep    |
| 8.90E-22 | -0.5674557 | 0.057 | 0.258 | 1.26E-17 | Granulocytes Dnajc7   |
| 9.30E-22 | -0.5067816 | 0.02  | 0.198 | 1.32E-17 | Granulocytes Kdelr2   |
| 9.49E-22 | -0.5041978 | 0.041 | 0.231 | 1.34E-17 | Granulocytes Mrpl36   |
| 9.50E-22 | -0.479976  | 0.112 | 0.349 | 1.34E-17 | Granulocytes Dynlrb1  |
| 1.03E-21 | -0.6564966 | 0.01  | 0.178 | 1.46E-17 | Granulocytes Fam3c    |
| 1.06E-21 | -0.5423879 | 0.045 | 0.24  | 1.50E-17 | Granulocytes Taf15    |
| 1.09E-21 | -1.0743263 | 0.022 | 0.198 | 1.55E-17 | Granulocytes Cd55     |
| 1.12E-21 | -0.466823  | 0.047 | 0.243 | 1.58E-17 | Granulocytes Txndc9   |
| 1.20E-21 | -0.6518658 | 0.025 | 0.202 | 1.70E-17 | Granulocytes Sh3bgrl  |
| 1.25E-21 | -0.9625596 | 0.008 | 0.173 | 1.77E-17 | Granulocytes Ralgps2  |
| 1.26E-21 | -0.5830339 | 0.012 | 0.182 | 1.79E-17 | Granulocytes Chchd7   |
| 1.31E-21 | -0.902857  | 0.025 | 0.2   | 1.86E-17 | Granulocytes Cd72     |
| 1.35E-21 | -0.532351  | 0.02  | 0.196 | 1.91E-17 | Granulocytes Mrps18a  |
| 1.35E-21 | -0.5406226 | 0.027 | 0.208 | 1.91E-17 | Granulocytes Hnrnpd   |
| 1.38E-21 | 0.92120294 | 0.153 | 0.053 | 1.96E-17 | Granulocytes Cpne2    |
| 1.74E-21 | -0.5024405 | 0.033 | 0.217 | 2.46E-17 | Granulocytes Sar1b    |
| 1.75E-21 | -0.4119886 | 0.127 | 0.373 | 2.48E-17 | Granulocytes Cirbp    |
| 1.77E-21 | -0.5213589 | 0.182 | 0.442 | 2.51E-17 | Granulocytes Ndufb7   |
| 1.78E-21 | -0.6439755 | 0.01  | 0.176 | 2.53E-17 | Granulocytes Snrpa1   |
| 1.83E-21 | -0.4732186 | 0.09  | 0.309 | 2.58E-17 | Granulocytes Pfdn2    |
| 1.97E-21 | -0.5663143 | 0.027 | 0.204 | 2.79E-17 | Granulocytes Arl6ip4  |
| 2.05E-21 | -0.6018341 | 0.025 | 0.201 | 2.90E-17 | Granulocytes Nans     |
| 2.19E-21 | 1.0507467  | 0.538 | 0.45  | 3.10E-17 | Granulocytes Adgre5   |
| 2.37E-21 | -0.474842  | 0.19  | 0.457 | 3.35E-17 | Granulocytes Rap1a    |
| 2.38E-21 | -0.4563985 | 0.153 | 0.405 | 3.37E-17 | Granulocytes Luc7l2   |
| 2.49E-21 | -0.4789958 | 0.057 | 0.254 | 3.52E-17 | Granulocytes Taf10    |
| 2.49E-21 | -0.5343828 | 0.012 | 0.18  | 3.52E-17 | Granulocytes Mdp1     |
| 2.54E-21 | -0.5236278 | 0.051 | 0.245 | 3.60E-17 | Granulocytes U2af2    |
| 2.70E-21 | -1.307338  | 0.014 | 0.181 | 3.82E-17 | Granulocytes Ms4a1    |
| 2.76E-21 | -0.5400607 | 0.055 | 0.249 | 3.90E-17 | Granulocytes Ctbp1    |
| 2.79E-21 | -0.6058604 | 0.059 | 0.254 | 3.95E-17 | Granulocytes Myo1g    |

|          |            |       |       |          |                         |
|----------|------------|-------|-------|----------|-------------------------|
| 2.80E-21 | -0.5214629 | 0.016 | 0.186 | 3.96E-17 | Granulocytes Pam16      |
| 2.85E-21 | -0.6499132 | 0.049 | 0.241 | 4.04E-17 | Granulocytes Odc1       |
| 2.98E-21 | -0.5103714 | 0.057 | 0.258 | 4.21E-17 | Granulocytes Ppm1g      |
| 2.99E-21 | -0.5983393 | 0.037 | 0.221 | 4.23E-17 | Granulocytes Prpf38b    |
| 3.10E-21 | -0.6045747 | 0.012 | 0.18  | 4.39E-17 | Granulocytes Ccdc50     |
| 3.41E-21 | -0.5541222 | 0.035 | 0.217 | 4.83E-17 | Granulocytes Acadl      |
| 3.55E-21 | -0.5161271 | 0.037 | 0.221 | 5.02E-17 | Granulocytes Smarce1    |
| 3.70E-21 | -0.6995137 | 0.016 | 0.184 | 5.23E-17 | Granulocytes Vars       |
| 3.81E-21 | -0.5791116 | 0.016 | 0.186 | 5.39E-17 | Granulocytes Gadd45gip1 |
| 3.82E-21 | -0.3825773 | 0.059 | 0.259 | 5.41E-17 | Granulocytes Gm16286    |
| 3.88E-21 | -0.5109482 | 0.031 | 0.211 | 5.49E-17 | Granulocytes Mrpl32     |
| 3.88E-21 | -0.5620547 | 0.027 | 0.202 | 5.49E-17 | Granulocytes Nfu1       |
| 4.05E-21 | -0.4476185 | 0.08  | 0.293 | 5.74E-17 | Granulocytes Gtf2h5     |
| 4.26E-21 | -0.5284592 | 0.094 | 0.31  | 6.03E-17 | Granulocytes M6pr       |
| 4.41E-21 | -0.5004662 | 0.063 | 0.264 | 6.24E-17 | Granulocytes Ndufs6     |
| 4.42E-21 | -0.5587717 | 0.018 | 0.189 | 6.26E-17 | Granulocytes Rtcb       |
| 4.46E-21 | 0.51842018 | 0.836 | 0.795 | 6.31E-17 | Granulocytes Rac2       |
| 4.52E-21 | -0.5274662 | 0.016 | 0.186 | 6.41E-17 | Granulocytes Mrps34     |
| 4.56E-21 | -0.5822344 | 0.008 | 0.169 | 6.46E-17 | Granulocytes Paics      |
| 4.91E-21 | -0.5921332 | 0.027 | 0.204 | 6.95E-17 | Granulocytes Hnrnph3    |
| 5.19E-21 | 1.02985966 | 0.18  | 0.071 | 7.34E-17 | Granulocytes Smim3      |
| 5.19E-21 | -0.4329429 | 0.168 | 0.42  | 7.35E-17 | Granulocytes Tmed2      |
| 5.29E-21 | -0.6797492 | 0.016 | 0.184 | 7.49E-17 | Granulocytes Rasal3     |
| 5.61E-21 | -0.5397952 | 0.057 | 0.252 | 7.94E-17 | Granulocytes Eif1ax     |
| 5.76E-21 | -0.7557922 | 0.008 | 0.168 | 8.15E-17 | Granulocytes Man1a      |
| 5.94E-21 | -2.5642591 | 0.039 | 0.213 | 8.41E-17 | Granulocytes C1qb       |
| 6.42E-21 | -0.4606852 | 0.333 | 0.621 | 9.09E-17 | Granulocytes Cox6b1     |
| 6.77E-21 | -0.6011381 | 0.016 | 0.184 | 9.58E-17 | Granulocytes Tmem126a   |
| 6.99E-21 | -0.6014166 | 0.025 | 0.197 | 9.90E-17 | Granulocytes Snrpa      |
| 7.00E-21 | -0.5853971 | 0.02  | 0.189 | 9.91E-17 | Granulocytes Dpy30      |
| 7.18E-21 | -0.5968874 | 0.082 | 0.291 | 1.02E-16 | Granulocytes Tap1       |
| 7.68E-21 | -0.6033058 | 0.022 | 0.192 | 1.09E-16 | Granulocytes Snhg12     |
| 8.02E-21 | -0.3803918 | 0.223 | 0.503 | 1.13E-16 | Granulocytes Uqcrq      |
| 8.02E-21 | -0.7280365 | 0.025 | 0.195 | 1.13E-16 | Granulocytes Gimap9     |
| 8.36E-21 | -0.5076352 | 0.151 | 0.394 | 1.18E-16 | Granulocytes Leprotl1   |
| 8.54E-21 | -0.485664  | 0.065 | 0.264 | 1.21E-16 | Granulocytes Zbtb7a     |
| 8.58E-21 | -0.5377252 | 0.072 | 0.275 | 1.21E-16 | Granulocytes Tor1aip2   |
| 8.60E-21 | 0.53804586 | 0.36  | 0.192 | 1.22E-16 | Granulocytes Tgfbi      |
| 8.69E-21 | -0.515256  | 0.018 | 0.187 | 1.23E-16 | Granulocytes Mydgf      |
| 8.71E-21 | -0.5746476 | 0.045 | 0.231 | 1.23E-16 | Granulocytes Foxn3      |
| 8.77E-21 | -0.4380605 | 0.084 | 0.293 | 1.24E-16 | Granulocytes Prpf40a    |
| 8.99E-21 | -0.4133467 | 0.133 | 0.37  | 1.27E-16 | Granulocytes Dctn3      |
| 9.09E-21 | -0.590643  | 0.025 | 0.197 | 1.29E-16 | Granulocytes Pop5       |
| 9.16E-21 | -0.9359934 | 0.01  | 0.17  | 1.30E-16 | Granulocytes Klrk1      |
| 9.69E-21 | -0.7764449 | 0.016 | 0.18  | 1.37E-16 | Granulocytes Nrp1       |
| 1.02E-20 | 1.01911023 | 0.172 | 0.066 | 1.44E-16 | Granulocytes Pdlim7     |
| 1.04E-20 | -0.4390153 | 0.082 | 0.291 | 1.48E-16 | Granulocytes Rbm8a      |
| 1.05E-20 | -0.5064364 | 0.215 | 0.481 | 1.49E-16 | Granulocytes H2-T23     |

|          |            |       |       |          |                       |
|----------|------------|-------|-------|----------|-----------------------|
| 1.08E-20 | -0.495831  | 0.053 | 0.242 | 1.53E-16 | Granulocytes Uqcr2    |
| 1.10E-20 | -0.7804023 | 0.039 | 0.216 | 1.56E-16 | Granulocytes Nfatc3   |
| 1.16E-20 | -0.5372855 | 0.018 | 0.185 | 1.64E-16 | Granulocytes Acbd6    |
| 1.20E-20 | -0.5854294 | 0.051 | 0.239 | 1.70E-16 | Granulocytes Ddx50    |
| 1.24E-20 | 0.8566671  | 0.587 | 0.537 | 1.75E-16 | Granulocytes Ostf1    |
| 1.28E-20 | -0.5051933 | 0.049 | 0.239 | 1.81E-16 | Granulocytes Actn4    |
| 1.29E-20 | -0.5051635 | 0.033 | 0.21  | 1.83E-16 | Granulocytes Glrx5    |
| 1.35E-20 | -0.4266825 | 0.074 | 0.28  | 1.91E-16 | Granulocytes Sugt1    |
| 1.37E-20 | -0.5483508 | 0.415 | 0.706 | 1.94E-16 | Granulocytes Eif5a    |
| 1.39E-20 | -0.5903986 | 0.027 | 0.198 | 1.96E-16 | Granulocytes Uchl3    |
| 1.47E-20 | -0.5665389 | 0.049 | 0.234 | 2.08E-16 | Granulocytes Tmem208  |
| 1.51E-20 | 0.99005336 | 0.176 | 0.069 | 2.14E-16 | Granulocytes Mir142hg |
| 1.57E-20 | -0.510166  | 0.022 | 0.192 | 2.23E-16 | Granulocytes Osgep    |
| 1.58E-20 | -0.7442981 | 0.041 | 0.221 | 2.24E-16 | Granulocytes Malt1    |
| 1.65E-20 | -0.4942955 | 0.029 | 0.204 | 2.33E-16 | Granulocytes Psmb7    |
| 1.82E-20 | -0.7633342 | 0.027 | 0.197 | 2.57E-16 | Granulocytes mt-Nd6   |
| 1.87E-20 | -0.6134557 | 0.012 | 0.173 | 2.65E-16 | Granulocytes Ddx18    |
| 1.91E-20 | -0.6430349 | 0.783 | 0.938 | 2.71E-16 | Granulocytes Lars2    |
| 1.91E-20 | -0.5035768 | 0.049 | 0.236 | 2.71E-16 | Granulocytes Tex261   |
| 1.92E-20 | -0.6050331 | 0.031 | 0.204 | 2.72E-16 | Granulocytes Gm11808  |
| 1.97E-20 | -0.5755165 | 0.004 | 0.159 | 2.78E-16 | Granulocytes Lpxn     |
| 2.13E-20 | 0.97110578 | 0.151 | 0.054 | 3.01E-16 | Granulocytes Pfkfb4   |
| 2.22E-20 | 1.17613822 | 0.284 | 0.154 | 3.14E-16 | Granulocytes Gsn      |
| 2.39E-20 | -1.1129154 | 0.022 | 0.187 | 3.39E-16 | Granulocytes Id3      |
| 2.46E-20 | -0.4878559 | 0.035 | 0.21  | 3.48E-16 | Granulocytes Eif3l    |
| 2.47E-20 | -1.0387455 | 0.039 | 0.212 | 3.50E-16 | Granulocytes Fcgr2b   |
| 2.54E-20 | -0.5397674 | 0.031 | 0.204 | 3.59E-16 | Granulocytes Cbx1     |
| 2.71E-20 | 1.2232518  | 0.36  | 0.229 | 3.84E-16 | Granulocytes Per1     |
| 2.74E-20 | -0.3832556 | 0.123 | 0.352 | 3.88E-16 | Granulocytes Ndufs7   |
| 3.16E-20 | -0.5236052 | 0.319 | 0.6   | 4.47E-16 | Granulocytes Ndufa13  |
| 3.27E-20 | -0.5764818 | 0.117 | 0.34  | 4.63E-16 | Granulocytes Rrbp1    |
| 3.40E-20 | -0.5589264 | 0.037 | 0.213 | 4.81E-16 | Granulocytes Tbrg1    |
| 3.49E-20 | -0.6462893 | 0.002 | 0.154 | 4.94E-16 | Granulocytes Cd38     |
| 3.57E-20 | -0.5416295 | 0.051 | 0.236 | 5.05E-16 | Granulocytes Bub3     |
| 3.59E-20 | -0.8342308 | 0.008 | 0.164 | 5.09E-16 | Granulocytes Ckb      |
| 3.66E-20 | -0.4806481 | 0.035 | 0.21  | 5.18E-16 | Granulocytes Psmd14   |
| 3.71E-20 | -0.3916091 | 0.059 | 0.25  | 5.25E-16 | Granulocytes Ndufs2   |
| 3.72E-20 | -0.4333481 | 0.194 | 0.455 | 5.27E-16 | Granulocytes Erp29    |
| 4.16E-20 | -0.5927503 | 0.008 | 0.162 | 5.89E-16 | Granulocytes Csrp1    |
| 4.25E-20 | -0.5824295 | 0.008 | 0.164 | 6.02E-16 | Granulocytes Brix1    |
| 4.33E-20 | 1.03239189 | 0.562 | 0.489 | 6.13E-16 | Granulocytes Samhd1   |
| 4.67E-20 | -0.5291246 | 0.065 | 0.261 | 6.62E-16 | Granulocytes Cd164    |
| 4.77E-20 | -0.4756409 | 0.055 | 0.245 | 6.75E-16 | Granulocytes Naa10    |
| 5.07E-20 | -0.6184404 | 0.043 | 0.222 | 7.17E-16 | Granulocytes Pdc4     |
| 5.09E-20 | -0.5606452 | 0.022 | 0.186 | 7.21E-16 | Granulocytes Ssbp4    |
| 5.14E-20 | 1.08765242 | 0.215 | 0.096 | 7.27E-16 | Granulocytes Tlr2     |
| 5.16E-20 | 0.7090378  | 0.687 | 0.676 | 7.30E-16 | Granulocytes Ptprc    |
| 5.26E-20 | -0.478576  | 0.147 | 0.379 | 7.44E-16 | Granulocytes Stk24    |

|          |            |       |       |          |                      |
|----------|------------|-------|-------|----------|----------------------|
| 5.34E-20 | -0.9079838 | 0.02  | 0.182 | 7.56E-16 | Granulocytes Gpr183  |
| 5.38E-20 | -0.5644151 | 0.027 | 0.195 | 7.61E-16 | Granulocytes Gspt1   |
| 5.52E-20 | -0.5428858 | 0.041 | 0.218 | 7.81E-16 | Granulocytes Ube3a   |
| 5.83E-20 | -0.5043951 | 0.014 | 0.174 | 8.25E-16 | Granulocytes Slirp   |
| 6.54E-20 | -0.4602248 | 0.106 | 0.322 | 9.26E-16 | Granulocytes Mlf2    |
| 6.64E-20 | -0.5133991 | 0.014 | 0.173 | 9.40E-16 | Granulocytes Samm50  |
| 6.76E-20 | -0.4002044 | 0.065 | 0.262 | 9.57E-16 | Granulocytes Gps2    |
| 6.77E-20 | -0.5872868 | 0.027 | 0.194 | 9.59E-16 | Granulocytes Gorasp2 |
| 6.82E-20 | -0.4801745 | 0.215 | 0.473 | 9.66E-16 | Granulocytes Arhgef1 |
| 7.15E-20 | -0.5990803 | 0.072 | 0.266 | 1.01E-15 | Granulocytes Scaf11  |
| 7.44E-20 | -0.8433882 | 0.16  | 0.375 | 1.05E-15 | Granulocytes Ctsz    |
| 7.50E-20 | -0.4980469 | 0.008 | 0.163 | 1.06E-15 | Granulocytes Clns1a  |
| 7.71E-20 | -0.4906685 | 0.049 | 0.232 | 1.09E-15 | Granulocytes Cetn3   |
| 7.95E-20 | -0.4721186 | 0.025 | 0.192 | 1.13E-15 | Granulocytes Suclg1  |
| 9.21E-20 | -0.3230444 | 0.098 | 0.309 | 1.30E-15 | Granulocytes Dnaja2  |
| 9.26E-20 | -0.645251  | 0.012 | 0.168 | 1.31E-15 | Granulocytes Dnajc1  |
| 9.35E-20 | -0.4248816 | 0.049 | 0.234 | 1.32E-15 | Granulocytes Rnf138  |
| 1.02E-19 | -0.5008034 | 0.018 | 0.179 | 1.44E-15 | Granulocytes Psm2    |
| 1.03E-19 | -0.5803282 | 0.072 | 0.265 | 1.46E-15 | Granulocytes Matr3   |
| 1.05E-19 | -0.3594388 | 0.157 | 0.401 | 1.48E-15 | Granulocytes Lamtor2 |
| 1.14E-19 | -0.5171153 | 0.037 | 0.21  | 1.61E-15 | Granulocytes Anapc5  |
| 1.15E-19 | -1.3698086 | 0.012 | 0.167 | 1.62E-15 | Granulocytes Tnfrsf4 |
| 1.23E-19 | -0.628286  | 0.035 | 0.204 | 1.74E-15 | Granulocytes Sf3b3   |
| 1.25E-19 | -0.4571597 | 0.074 | 0.271 | 1.77E-15 | Granulocytes Gltf    |
| 1.26E-19 | -0.7276236 | 0.014 | 0.17  | 1.79E-15 | Granulocytes Ass1    |
| 1.35E-19 | -0.4873772 | 0.178 | 0.42  | 1.91E-15 | Granulocytes Cmtm7   |
| 1.35E-19 | -2.1885807 | 0.025 | 0.185 | 1.91E-15 | Granulocytes C1qc    |
| 1.38E-19 | -0.4684082 | 0.049 | 0.229 | 1.96E-15 | Granulocytes Polr2j  |
| 1.39E-19 | -2.3010279 | 0.029 | 0.19  | 1.96E-15 | Granulocytes C1qa    |
| 1.45E-19 | -0.6218376 | 0.45  | 0.711 | 2.05E-15 | Granulocytes Dnaja1  |
| 1.47E-19 | -0.5391998 | 0.047 | 0.226 | 2.08E-15 | Granulocytes Ddx39   |
| 1.50E-19 | -0.5498366 | 0.014 | 0.171 | 2.13E-15 | Granulocytes Gtppb4  |
| 1.51E-19 | -0.3708217 | 0.112 | 0.331 | 2.13E-15 | Granulocytes Ap2m1   |
| 1.54E-19 | -1.9128654 | 0.121 | 0.311 | 2.17E-15 | Granulocytes Apoe    |
| 1.54E-19 | -0.5029059 | 0.02  | 0.182 | 2.18E-15 | Granulocytes Ddx47   |
| 1.62E-19 | -0.6993708 | 0.01  | 0.163 | 2.30E-15 | Granulocytes Inpp4b  |
| 1.65E-19 | -0.4576165 | 0.104 | 0.317 | 2.34E-15 | Granulocytes Dusp11  |
| 1.65E-19 | -0.5841241 | 0.041 | 0.216 | 2.34E-15 | Granulocytes Tpp2    |
| 1.71E-19 | 1.40450941 | 0.354 | 0.224 | 2.42E-15 | Granulocytes Nfkbid  |
| 1.72E-19 | -0.6023391 | 0.012 | 0.167 | 2.44E-15 | Granulocytes Pdia4   |
| 1.74E-19 | -0.62786   | 0.008 | 0.159 | 2.47E-15 | Granulocytes Sczep1  |
| 1.76E-19 | -0.4397791 | 0.037 | 0.212 | 2.49E-15 | Granulocytes Nsmce4a |
| 1.89E-19 | -0.5496195 | 0.012 | 0.165 | 2.68E-15 | Granulocytes Mrpl13  |
| 2.03E-19 | -0.6711632 | 0.039 | 0.211 | 2.87E-15 | Granulocytes Tagap   |
| 2.15E-19 | -0.5832881 | 0.016 | 0.173 | 3.05E-15 | Granulocytes Fam204a |
| 2.16E-19 | -0.5402991 | 0.043 | 0.217 | 3.06E-15 | Granulocytes Sf3b4   |
| 2.25E-19 | -0.7384741 | 0.01  | 0.162 | 3.19E-15 | Granulocytes Havcr2  |
| 2.60E-19 | -0.4598228 | 0.047 | 0.225 | 3.68E-15 | Granulocytes Idnk    |

|          |            |       |       |          |                       |
|----------|------------|-------|-------|----------|-----------------------|
| 2.65E-19 | -0.4521558 | 0.008 | 0.159 | 3.75E-15 | Granulocytes Prdx3    |
| 2.73E-19 | -0.4133561 | 0.057 | 0.241 | 3.87E-15 | Granulocytes Coa3     |
| 2.89E-19 | -0.5803445 | 0.008 | 0.158 | 4.09E-15 | Granulocytes Mri1     |
| 2.94E-19 | -0.4752256 | 0.047 | 0.223 | 4.16E-15 | Granulocytes Dctn6    |
| 3.09E-19 | -0.4861229 | 0.09  | 0.292 | 4.37E-15 | Granulocytes Sh3kbp1  |
| 3.12E-19 | -0.5339259 | 0.014 | 0.167 | 4.42E-15 | Granulocytes Ndufa9   |
| 3.32E-19 | -0.9017603 | 0.047 | 0.218 | 4.70E-15 | Granulocytes Cd81     |
| 3.40E-19 | -0.5883562 | 0.016 | 0.174 | 4.81E-15 | Granulocytes Ubash3b  |
| 3.48E-19 | -0.7256462 | 0.029 | 0.19  | 4.92E-15 | Granulocytes Stt3b    |
| 3.52E-19 | -0.5621458 | 0.025 | 0.184 | 4.99E-15 | Granulocytes Chchd3   |
| 3.66E-19 | -0.6136077 | 0.022 | 0.181 | 5.18E-15 | Granulocytes Polr2m   |
| 3.92E-19 | -0.5827908 | 0.035 | 0.203 | 5.55E-15 | Granulocytes Bod1l    |
| 4.07E-19 | -0.4018868 | 0.039 | 0.21  | 5.76E-15 | Granulocytes Sltm     |
| 4.07E-19 | -0.5156764 | 0.029 | 0.193 | 5.77E-15 | Granulocytes Ttc14    |
| 4.08E-19 | -0.313071  | 0.125 | 0.35  | 5.77E-15 | Granulocytes Rer1     |
| 4.15E-19 | -0.5227595 | 0.025 | 0.185 | 5.87E-15 | Granulocytes Cops8    |
| 4.19E-19 | -0.3234244 | 0.174 | 0.418 | 5.93E-15 | Granulocytes Sp100    |
| 4.50E-19 | -1.0603461 | 0.012 | 0.162 | 6.37E-15 | Granulocytes Cd19     |
| 4.53E-19 | -0.3642251 | 0.112 | 0.329 | 6.42E-15 | Granulocytes Plekhj1  |
| 4.63E-19 | -0.476243  | 0.022 | 0.181 | 6.55E-15 | Granulocytes Ola1     |
| 4.75E-19 | -0.5845658 | 0.051 | 0.23  | 6.72E-15 | Granulocytes Med21    |
| 4.90E-19 | -0.9320453 | 0.008 | 0.157 | 6.94E-15 | Granulocytes Dusp10   |
| 4.95E-19 | -0.5003578 | 0.153 | 0.385 | 7.00E-15 | Granulocytes Hnrnpu   |
| 4.98E-19 | -0.4500669 | 0.061 | 0.244 | 7.05E-15 | Granulocytes Eif4h    |
| 5.42E-19 | -0.4798181 | 0.055 | 0.236 | 7.67E-15 | Granulocytes Ogdh     |
| 5.45E-19 | -0.6573156 | 0.004 | 0.149 | 7.71E-15 | Granulocytes Sh2d1a   |
| 5.50E-19 | -0.5222675 | 0.01  | 0.161 | 7.79E-15 | Granulocytes Prrc2b   |
| 5.55E-19 | -0.406295  | 0.063 | 0.248 | 7.85E-15 | Granulocytes Ssna1    |
| 5.73E-19 | -0.4837426 | 0.039 | 0.21  | 8.12E-15 | Granulocytes Tm2d1    |
| 5.84E-19 | -0.3951925 | 0.051 | 0.233 | 8.27E-15 | Granulocytes Lsm3     |
| 5.89E-19 | -0.6174216 | 0.006 | 0.152 | 8.33E-15 | Granulocytes Parp1    |
| 5.91E-19 | 1.24705587 | 0.284 | 0.16  | 8.37E-15 | Granulocytes Glipr2   |
| 6.07E-19 | -0.6015501 | 0.025 | 0.184 | 8.59E-15 | Granulocytes Syncrip  |
| 6.12E-19 | -0.5594296 | 0.02  | 0.178 | 8.66E-15 | Granulocytes Pnn      |
| 6.17E-19 | -0.4701166 | 0.029 | 0.19  | 8.73E-15 | Granulocytes Mrpl40   |
| 6.45E-19 | -0.5093484 | 0.025 | 0.185 | 9.13E-15 | Granulocytes Lrpap1   |
| 6.45E-19 | -0.6312763 | 0.025 | 0.184 | 9.13E-15 | Granulocytes Uhrf2    |
| 6.59E-19 | -0.6234233 | 0.006 | 0.152 | 9.33E-15 | Granulocytes Mllt3    |
| 6.78E-19 | -0.7991267 | 0.008 | 0.154 | 9.59E-15 | Granulocytes Rasgef1b |
| 6.81E-19 | -0.6319162 | 0.041 | 0.212 | 9.63E-15 | Granulocytes Rbpj     |
| 7.03E-19 | -0.6048464 | 0.012 | 0.162 | 9.95E-15 | Granulocytes Alkbh1   |
| 7.21E-19 | -0.4923343 | 0.037 | 0.205 | 1.02E-14 | Granulocytes Dnajb11  |
| 7.46E-19 | -0.5012937 | 0.067 | 0.257 | 1.06E-14 | Granulocytes Rbbp4    |
| 7.50E-19 | -0.3888516 | 0.143 | 0.374 | 1.06E-14 | Granulocytes Peli1    |
| 7.51E-19 | -0.5608997 | 0.049 | 0.225 | 1.06E-14 | Granulocytes Traf1    |
| 7.58E-19 | -0.7872437 | 0.01  | 0.158 | 1.07E-14 | Granulocytes Cd5      |
| 7.62E-19 | -0.8109317 | 0.002 | 0.144 | 1.08E-14 | Granulocytes Fasl     |
| 8.01E-19 | -0.5773544 | 0.029 | 0.189 | 1.13E-14 | Granulocytes Ddx54    |

|          |            |       |       |          |                          |
|----------|------------|-------|-------|----------|--------------------------|
| 8.03E-19 | -0.5520254 | 0.041 | 0.208 | 1.14E-14 | Granulocytes Ubac2       |
| 8.06E-19 | -0.3951706 | 0.065 | 0.25  | 1.14E-14 | Granulocytes Trappc6b    |
| 8.26E-19 | 0.98796889 | 0.581 | 0.548 | 1.17E-14 | Granulocytes Ube2b       |
| 8.40E-19 | -0.449976  | 0.037 | 0.205 | 1.19E-14 | Granulocytes Sf3a2       |
| 8.58E-19 | -0.4496283 | 0.2   | 0.449 | 1.21E-14 | Granulocytes Psmb9       |
| 8.88E-19 | -0.5982014 | 0.022 | 0.179 | 1.26E-14 | Granulocytes B4galt1     |
| 8.96E-19 | -0.5030531 | 0.022 | 0.179 | 1.27E-14 | Granulocytes Tmem192     |
| 9.70E-19 | -0.5880818 | 0.02  | 0.176 | 1.37E-14 | Granulocytes Nolc1       |
| 1.02E-18 | -0.5262122 | 0.088 | 0.281 | 1.44E-14 | Granulocytes Fermt3      |
| 1.08E-18 | -0.4191603 | 0.057 | 0.237 | 1.53E-14 | Granulocytes Ngdn        |
| 1.09E-18 | -0.4732592 | 0.037 | 0.204 | 1.54E-14 | Granulocytes Guk1        |
| 1.10E-18 | -0.4901376 | 0.012 | 0.162 | 1.55E-14 | Granulocytes Nip7        |
| 1.11E-18 | -0.6283516 | 0.004 | 0.147 | 1.58E-14 | Granulocytes Itpr1       |
| 1.14E-18 | -0.4826705 | 0.053 | 0.231 | 1.61E-14 | Granulocytes Srsf6       |
| 1.18E-18 | -0.5294774 | 0.02  | 0.174 | 1.67E-14 | Granulocytes Rad23b      |
| 1.23E-18 | -0.4383323 | 0.053 | 0.23  | 1.74E-14 | Granulocytes Lims1       |
| 1.24E-18 | -0.6317856 | 0.006 | 0.15  | 1.75E-14 | Granulocytes Kdm2b       |
| 1.30E-18 | -0.7678137 | 0.135 | 0.34  | 1.84E-14 | Granulocytes Napsa       |
| 1.36E-18 | -0.5231129 | 0.008 | 0.154 | 1.93E-14 | Granulocytes Oxa1l       |
| 1.37E-18 | -0.3907012 | 0.041 | 0.211 | 1.94E-14 | Granulocytes Commd7      |
| 1.44E-18 | -0.8005192 | 0     | 0.139 | 2.03E-14 | Granulocytes Izumo1r     |
| 1.51E-18 | -0.5271258 | 0.022 | 0.179 | 2.14E-14 | Granulocytes Pon2        |
| 1.59E-18 | -0.5287121 | 0.016 | 0.166 | 2.25E-14 | Granulocytes 1110038F14F |
| 1.63E-18 | -0.5042526 | 0.018 | 0.17  | 2.31E-14 | Granulocytes Snrnp40     |
| 1.65E-18 | -0.6562502 | 0.027 | 0.185 | 2.33E-14 | Granulocytes Itgav       |
| 1.66E-18 | -0.4172851 | 0.045 | 0.217 | 2.35E-14 | Granulocytes Fcf1        |
| 1.66E-18 | -0.5144541 | 0.035 | 0.199 | 2.35E-14 | Granulocytes Yipf5       |
| 1.67E-18 | -0.5525092 | 0.008 | 0.152 | 2.36E-14 | Granulocytes Actl6a      |
| 1.75E-18 | -0.5549928 | 0.018 | 0.17  | 2.48E-14 | Granulocytes Pop7        |
| 1.77E-18 | -0.4581713 | 0.035 | 0.198 | 2.51E-14 | Granulocytes Ndufv1      |
| 1.90E-18 | -0.7152268 | 0.025 | 0.18  | 2.69E-14 | Granulocytes Cerk        |
| 1.92E-18 | 1.09453747 | 0.497 | 0.416 | 2.72E-14 | Granulocytes Ccnl1       |
| 1.96E-18 | 1.02978181 | 0.135 | 0.047 | 2.77E-14 | Granulocytes Osgin1      |
| 1.97E-18 | -0.4400552 | 0.055 | 0.232 | 2.79E-14 | Granulocytes Ift20       |
| 1.98E-18 | -0.9015174 | 0.022 | 0.177 | 2.80E-14 | Granulocytes Aif1        |
| 2.05E-18 | -0.5120942 | 0.006 | 0.149 | 2.90E-14 | Granulocytes Immt        |
| 2.10E-18 | -0.5133803 | 0.025 | 0.181 | 2.97E-14 | Granulocytes Phax        |
| 2.10E-18 | -0.3288827 | 0.29  | 0.58  | 2.97E-14 | Granulocytes Morf4l1     |
| 2.14E-18 | -0.6770755 | 0.016 | 0.167 | 3.03E-14 | Granulocytes Gpr18       |
| 2.18E-18 | -0.539423  | 0.047 | 0.218 | 3.08E-14 | Granulocytes Csnk2a1     |
| 2.20E-18 | -0.8388715 | 0.1   | 0.291 | 3.12E-14 | Granulocytes Cybb        |
| 2.35E-18 | -0.5024597 | 0.025 | 0.179 | 3.33E-14 | Granulocytes Psmg4       |
| 2.36E-18 | -0.5639861 | 0.016 | 0.166 | 3.34E-14 | Granulocytes Luc7l3      |
| 2.45E-18 | -0.4285399 | 0.037 | 0.2   | 3.47E-14 | Granulocytes Mrps12      |
| 2.55E-18 | -0.5043649 | 0.084 | 0.274 | 3.61E-14 | Granulocytes Tgfbr2      |
| 2.61E-18 | -0.5485705 | 0.02  | 0.172 | 3.69E-14 | Granulocytes Trim28      |
| 2.68E-18 | -0.5359552 | 0.27  | 0.514 | 3.79E-14 | Granulocytes Serinc3     |
| 2.95E-18 | -0.4478509 | 0.072 | 0.257 | 4.17E-14 | Granulocytes Ube2j1      |

|          |            |       |       |          |                          |
|----------|------------|-------|-------|----------|--------------------------|
| 2.98E-18 | -0.4808082 | 0.076 | 0.258 | 4.21E-14 | Granulocytes Ai413582    |
| 3.11E-18 | -0.5142948 | 0.039 | 0.204 | 4.41E-14 | Granulocytes N4bp2l2     |
| 3.12E-18 | -0.4106513 | 0.033 | 0.196 | 4.42E-14 | Granulocytes Fip1l1      |
| 3.22E-18 | -0.443778  | 0.072 | 0.255 | 4.56E-14 | Granulocytes Mvb12a      |
| 3.26E-18 | -0.5275555 | 0.067 | 0.248 | 4.61E-14 | Granulocytes Chd1        |
| 3.48E-18 | -0.616824  | 0.025 | 0.179 | 4.93E-14 | Granulocytes Rassf4      |
| 3.65E-18 | -0.3954374 | 0.274 | 0.555 | 5.17E-14 | Granulocytes Cox7a2      |
| 3.75E-18 | -0.5583091 | 0.01  | 0.153 | 5.31E-14 | Granulocytes Plekho1     |
| 3.75E-18 | -0.4547724 | 0.031 | 0.189 | 5.31E-14 | Granulocytes Srp72       |
| 3.81E-18 | -0.5089068 | 0.037 | 0.198 | 5.39E-14 | Granulocytes Rpn1        |
| 3.82E-18 | -0.3995085 | 0.029 | 0.188 | 5.41E-14 | Granulocytes Eprs        |
| 4.03E-18 | -0.5784768 | 0.02  | 0.17  | 5.70E-14 | Granulocytes Adcy7       |
| 4.05E-18 | -0.5041899 | 0.027 | 0.181 | 5.74E-14 | Granulocytes Slc35b1     |
| 4.12E-18 | -0.4659424 | 0.035 | 0.196 | 5.84E-14 | Granulocytes O610012G03l |
| 4.13E-18 | -0.586536  | 0.006 | 0.146 | 5.84E-14 | Granulocytes Mcm6        |
| 4.19E-18 | -0.5362018 | 0.039 | 0.202 | 5.93E-14 | Granulocytes Cd86        |
| 4.29E-18 | -0.4289092 | 0.086 | 0.276 | 6.08E-14 | Granulocytes Rnh1        |
| 4.50E-18 | -0.4688309 | 0.002 | 0.139 | 6.37E-14 | Granulocytes Idh3a       |
| 4.63E-18 | -0.3662519 | 0.045 | 0.214 | 6.55E-14 | Granulocytes Slc25a39    |
| 4.78E-18 | -0.5373501 | 0.008 | 0.149 | 6.76E-14 | Granulocytes Pigp        |
| 5.35E-18 | -0.4724157 | 0.051 | 0.223 | 7.58E-14 | Granulocytes Cbx4        |
| 5.37E-18 | -0.5269235 | 0.004 | 0.141 | 7.61E-14 | Granulocytes Ebpl        |
| 5.40E-18 | -0.4941866 | 0.033 | 0.19  | 7.64E-14 | Granulocytes Eif3b       |
| 5.55E-18 | -0.7826793 | 0.01  | 0.152 | 7.86E-14 | Granulocytes Bach2       |
| 5.63E-18 | -0.4428011 | 0.029 | 0.186 | 7.97E-14 | Granulocytes Lsm2        |
| 5.81E-18 | -1.1688812 | 0.055 | 0.223 | 8.22E-14 | Granulocytes Hist1h2ap   |
| 6.08E-18 | -0.6034481 | 0.016 | 0.162 | 8.61E-14 | Granulocytes Hivep2      |
| 6.19E-18 | 1.15623564 | 0.411 | 0.295 | 8.77E-14 | Granulocytes Klf3        |
| 6.39E-18 | -0.3524688 | 0.18  | 0.421 | 9.04E-14 | Granulocytes Ndufa1      |
| 6.49E-18 | -0.4168136 | 0.047 | 0.217 | 9.19E-14 | Granulocytes Sec61a1     |
| 6.68E-18 | -0.4006061 | 0.072 | 0.255 | 9.46E-14 | Granulocytes Zbp1        |
| 6.77E-18 | -0.3201451 | 0.121 | 0.331 | 9.59E-14 | Granulocytes Bag1        |
| 7.11E-18 | -0.4613904 | 0.012 | 0.156 | 1.01E-13 | Granulocytes Immp1l      |
| 7.17E-18 | 0.50875733 | 0.838 | 0.844 | 1.02E-13 | Granulocytes Serf2       |
| 7.18E-18 | -0.4464712 | 0.014 | 0.16  | 1.02E-13 | Granulocytes Dohh        |
| 7.21E-18 | -0.4683235 | 0.117 | 0.32  | 1.02E-13 | Granulocytes Smim14      |
| 7.28E-18 | -0.5712216 | 0.016 | 0.162 | 1.03E-13 | Granulocytes Tcf3        |
| 7.80E-18 | -0.500869  | 0.018 | 0.165 | 1.10E-13 | Granulocytes Ythdf2      |
| 7.86E-18 | -0.4926257 | 0.002 | 0.137 | 1.11E-13 | Granulocytes Wdr18       |
| 8.26E-18 | -0.4751501 | 0.045 | 0.21  | 1.17E-13 | Granulocytes Itm2c       |
| 8.32E-18 | -0.5223576 | 0.02  | 0.168 | 1.18E-13 | Granulocytes Chd9        |
| 8.52E-18 | -0.5493736 | 0.008 | 0.146 | 1.21E-13 | Granulocytes Cat         |
| 8.64E-18 | -0.5011212 | 0.041 | 0.203 | 1.22E-13 | Granulocytes Hdac1       |
| 8.70E-18 | -0.5785869 | 0.004 | 0.14  | 1.23E-13 | Granulocytes Agpat3      |
| 9.03E-18 | -0.529445  | 0.016 | 0.161 | 1.28E-13 | Granulocytes Smarca4     |
| 9.30E-18 | -0.524364  | 0.033 | 0.189 | 1.32E-13 | Granulocytes Sars        |
| 9.43E-18 | -0.4185617 | 0.076 | 0.26  | 1.34E-13 | Granulocytes Pcd6ip      |
| 9.52E-18 | -0.4623916 | 0.039 | 0.202 | 1.35E-13 | Granulocytes Psmc6       |

|          |            |       |       |          |                         |
|----------|------------|-------|-------|----------|-------------------------|
| 1.01E-17 | -0.4043061 | 0.072 | 0.253 | 1.43E-13 | Granulocytes Pdna       |
| 1.03E-17 | -0.4517534 | 0.012 | 0.155 | 1.46E-13 | Granulocytes Blvra      |
| 1.05E-17 | -0.4912655 | 0.014 | 0.158 | 1.49E-13 | Granulocytes Tmem147    |
| 1.05E-17 | -0.5813252 | 0.02  | 0.168 | 1.49E-13 | Granulocytes Cndp2      |
| 1.06E-17 | -0.4698275 | 0.09  | 0.278 | 1.50E-13 | Granulocytes Kif5b      |
| 1.07E-17 | -0.3797039 | 0.135 | 0.353 | 1.51E-13 | Granulocytes Map2k2     |
| 1.08E-17 | -0.503404  | 0.016 | 0.161 | 1.52E-13 | Granulocytes Casp8      |
| 1.09E-17 | -0.5114101 | 0.018 | 0.163 | 1.54E-13 | Granulocytes Pdrgr1     |
| 1.10E-17 | -0.3377473 | 0.041 | 0.206 | 1.55E-13 | Granulocytes Strap      |
| 1.18E-17 | -0.3654281 | 0.16  | 0.385 | 1.67E-13 | Granulocytes Paip2      |
| 1.20E-17 | -0.398269  | 0.07  | 0.25  | 1.70E-13 | Granulocytes Znrd1      |
| 1.21E-17 | -0.4073414 | 0.078 | 0.262 | 1.71E-13 | Granulocytes Trappc4    |
| 1.21E-17 | -0.5196022 | 0.053 | 0.219 | 1.71E-13 | Granulocytes Pcmt1      |
| 1.23E-17 | -0.5752182 | 0.012 | 0.153 | 1.74E-13 | Granulocytes 5430416N02 |
| 1.31E-17 | -0.5016396 | 0.088 | 0.276 | 1.86E-13 | Granulocytes Sla        |
| 1.34E-17 | -0.4011202 | 0.354 | 0.619 | 1.90E-13 | Granulocytes Sec61b     |
| 1.41E-17 | -0.467014  | 0.01  | 0.15  | 2.00E-13 | Granulocytes Cisd1      |
| 1.46E-17 | -0.5592896 | 0.033 | 0.186 | 2.06E-13 | Granulocytes Limd1      |
| 1.46E-17 | -0.5070372 | 0.031 | 0.183 | 2.06E-13 | Granulocytes Trappc6a   |
| 1.46E-17 | -0.4729691 | 0.004 | 0.138 | 2.06E-13 | Granulocytes Timm50     |
| 1.47E-17 | -0.8334171 | 0.014 | 0.154 | 2.08E-13 | Granulocytes H2-Oa      |
| 1.49E-17 | -0.3505398 | 0.104 | 0.305 | 2.10E-13 | Granulocytes Ndufa8     |
| 1.51E-17 | -0.5376077 | 0.01  | 0.149 | 2.14E-13 | Granulocytes Rpa2       |
| 1.52E-17 | -0.4347443 | 0.033 | 0.188 | 2.15E-13 | Granulocytes Ssbp1      |
| 1.52E-17 | -0.526149  | 0.065 | 0.24  | 2.15E-13 | Granulocytes Rbm5       |
| 1.54E-17 | 0.97638586 | 0.19  | 0.086 | 2.17E-13 | Granulocytes Sephs2     |
| 1.58E-17 | -0.5368746 | 0.018 | 0.163 | 2.24E-13 | Granulocytes Tmem173    |
| 1.58E-17 | -0.529823  | 0.014 | 0.156 | 2.24E-13 | Granulocytes Tcerg1     |
| 1.59E-17 | -0.6936049 | 0.008 | 0.144 | 2.25E-13 | Granulocytes Sesn1      |
| 1.59E-17 | -0.4171875 | 0.025 | 0.175 | 2.25E-13 | Granulocytes Cdc123     |
| 1.64E-17 | -0.4716606 | 0.01  | 0.15  | 2.33E-13 | Granulocytes Plaa       |
| 1.69E-17 | -0.4125325 | 0.051 | 0.22  | 2.40E-13 | Granulocytes Dda1       |
| 1.77E-17 | -0.448815  | 0.041 | 0.202 | 2.51E-13 | Granulocytes Wbp4       |
| 1.79E-17 | -0.5590931 | 0.006 | 0.142 | 2.53E-13 | Granulocytes Ier5l      |
| 1.89E-17 | 0.88321688 | 0.303 | 0.173 | 2.67E-13 | Granulocytes Plbd1      |
| 1.89E-17 | -0.2810545 | 0.162 | 0.39  | 2.68E-13 | Granulocytes Sf1        |
| 1.90E-17 | -0.6224724 | 0.016 | 0.16  | 2.68E-13 | Granulocytes S1pr4      |
| 1.94E-17 | -0.5480479 | 0.043 | 0.204 | 2.75E-13 | Granulocytes Cenpa      |
| 1.98E-17 | 0.93885171 | 0.16  | 0.065 | 2.80E-13 | Granulocytes Antxr2     |
| 2.07E-17 | -0.6144401 | 0.012 | 0.15  | 2.93E-13 | Granulocytes Rasgrp1    |
| 2.11E-17 | -0.3263795 | 0.235 | 0.5   | 2.98E-13 | Granulocytes Arf1       |
| 2.15E-17 | -0.3329534 | 0.104 | 0.305 | 3.04E-13 | Granulocytes Lrp10      |
| 2.25E-17 | 0.94625273 | 0.235 | 0.118 | 3.19E-13 | Granulocytes Sirpb1c    |
| 2.26E-17 | -0.4387683 | 0.059 | 0.23  | 3.20E-13 | Granulocytes Elavl1     |
| 2.29E-17 | -0.424083  | 0.022 | 0.169 | 3.24E-13 | Granulocytes Get4       |
| 2.31E-17 | -0.5779723 | 0.014 | 0.153 | 3.26E-13 | Granulocytes Map4k1     |
| 2.31E-17 | -0.5476898 | 0.029 | 0.179 | 3.27E-13 | Granulocytes Lrmp       |
| 2.33E-17 | 0.86885043 | 0.141 | 0.053 | 3.29E-13 | Granulocytes Gpr35      |



|          |            |       |       |          |                         |
|----------|------------|-------|-------|----------|-------------------------|
| 2.34E-17 | -0.4221201 | 0.008 | 0.146 | 3.31E-13 | Granulocytes Lyar       |
| 2.37E-17 | -0.386319  | 0.035 | 0.192 | 3.36E-13 | Granulocytes Utp3       |
| 2.39E-17 | -0.3375478 | 0.096 | 0.289 | 3.38E-13 | Granulocytes Vps29      |
| 2.44E-17 | -0.2827656 | 0.092 | 0.284 | 3.45E-13 | Granulocytes Mea1       |
| 2.60E-17 | -0.4412292 | 0.02  | 0.165 | 3.68E-13 | Granulocytes Magohb     |
| 2.64E-17 | -0.3710868 | 0.07  | 0.245 | 3.74E-13 | Granulocytes Mrpl24     |
| 2.67E-17 | -0.4173346 | 0.092 | 0.281 | 3.78E-13 | Granulocytes Tap2       |
| 2.67E-17 | -0.5651127 | 0.014 | 0.154 | 3.78E-13 | Granulocytes Lrrc8c     |
| 2.68E-17 | -0.3450223 | 0.125 | 0.331 | 3.80E-13 | Granulocytes Pcd10      |
| 2.80E-17 | -0.539736  | 0.004 | 0.136 | 3.97E-13 | Granulocytes Mybbp1a    |
| 2.90E-17 | -0.4061493 | 0.084 | 0.269 | 4.11E-13 | Granulocytes Plgrkt     |
| 2.94E-17 | -0.4254155 | 0.033 | 0.187 | 4.16E-13 | Granulocytes Nsmce1     |
| 2.94E-17 | 0.76466372 | 0.139 | 0.052 | 4.17E-13 | Granulocytes Atp1a3     |
| 2.96E-17 | -0.2787041 | 0.145 | 0.369 | 4.19E-13 | Granulocytes Rbm42      |
| 2.98E-17 | -0.527183  | 0.004 | 0.137 | 4.21E-13 | Granulocytes Nsmaf      |
| 3.12E-17 | -0.5311286 | 0.01  | 0.147 | 4.42E-13 | Granulocytes Kcnab2     |
| 3.15E-17 | -0.4204871 | 0.035 | 0.191 | 4.46E-13 | Granulocytes Sbds       |
| 3.27E-17 | -1.0312779 | 0.047 | 0.206 | 4.62E-13 | Granulocytes Mt1        |
| 3.45E-17 | -0.4135134 | 0.149 | 0.366 | 4.88E-13 | Granulocytes Ctsa       |
| 3.52E-17 | -0.4368953 | 0.059 | 0.227 | 4.99E-13 | Granulocytes Ssr3       |
| 3.59E-17 | -0.808806  | 0.012 | 0.148 | 5.08E-13 | Granulocytes Sdc4       |
| 3.60E-17 | 0.93384288 | 0.209 | 0.1   | 5.10E-13 | Granulocytes Cfp        |
| 3.65E-17 | -0.4585413 | 0.014 | 0.155 | 5.16E-13 | Granulocytes Acld       |
| 3.74E-17 | -0.5073777 | 0.033 | 0.184 | 5.30E-13 | Granulocytes B230219D22 |
| 3.85E-17 | -0.4513379 | 0.016 | 0.157 | 5.46E-13 | Granulocytes Gtf3a      |
| 3.98E-17 | 0.7464572  | 0.112 | 0.037 | 5.64E-13 | Granulocytes Cd101      |
| 4.00E-17 | -0.5963786 | 0.01  | 0.147 | 5.67E-13 | Granulocytes Chchd10    |
| 4.08E-17 | -0.3921985 | 0.02  | 0.166 | 5.77E-13 | Granulocytes Ap1s1      |
| 4.09E-17 | -0.465257  | 0.076 | 0.252 | 5.79E-13 | Granulocytes Ikbkb      |
| 4.19E-17 | -0.4802338 | 0.025 | 0.169 | 5.94E-13 | Granulocytes Mrpl51     |
| 4.21E-17 | -0.5264123 | 0.012 | 0.149 | 5.95E-13 | Granulocytes Efr3a      |
| 4.25E-17 | -0.3798972 | 0.02  | 0.165 | 6.01E-13 | Granulocytes Acp1       |
| 4.27E-17 | 1.23496733 | 0.29  | 0.174 | 6.05E-13 | Granulocytes Eif4ebp1   |
| 4.28E-17 | -0.421173  | 0.031 | 0.182 | 6.07E-13 | Granulocytes Psm12      |
| 4.32E-17 | -0.6512337 | 0.008 | 0.142 | 6.11E-13 | Granulocytes Arap2      |
| 4.40E-17 | -0.4388427 | 0.051 | 0.216 | 6.22E-13 | Granulocytes Sdf2       |
| 4.40E-17 | -0.4515838 | 0.039 | 0.196 | 6.24E-13 | Granulocytes Fam162a    |
| 4.41E-17 | -0.3631039 | 0.041 | 0.2   | 6.24E-13 | Granulocytes Asna1      |
| 4.47E-17 | -0.4901105 | 0.027 | 0.175 | 6.32E-13 | Granulocytes Naa50      |
| 4.48E-17 | -0.5634673 | 0.029 | 0.178 | 6.34E-13 | Granulocytes Arid5b     |
| 4.51E-17 | -0.3925042 | 0.006 | 0.14  | 6.38E-13 | Granulocytes Qdpr       |
| 4.58E-17 | -0.276957  | 0.168 | 0.401 | 6.49E-13 | Granulocytes Tecr       |
| 4.65E-17 | -0.4594875 | 0.018 | 0.162 | 6.58E-13 | Granulocytes Kpnb1      |
| 5.25E-17 | -0.4859436 | 0.012 | 0.149 | 7.43E-13 | Granulocytes Ccdc85b    |
| 5.32E-17 | -0.3695317 | 0.072 | 0.248 | 7.53E-13 | Granulocytes Mrps18c    |
| 5.33E-17 | -0.4002988 | 0.074 | 0.253 | 7.55E-13 | Granulocytes Mrps15     |
| 5.46E-17 | -0.5028977 | 0.012 | 0.15  | 7.73E-13 | Granulocytes Irf2bpl    |
| 5.57E-17 | -0.5057514 | 0.018 | 0.159 | 7.88E-13 | Granulocytes Prkacb     |

|          |            |       |       |          |                          |
|----------|------------|-------|-------|----------|--------------------------|
| 5.61E-17 | -0.4576811 | 0.045 | 0.204 | 7.94E-13 | Granulocytes Rbck1       |
| 6.31E-17 | -0.4696846 | 0.006 | 0.138 | 8.93E-13 | Granulocytes Tm2d3       |
| 6.35E-17 | -0.4203382 | 0.027 | 0.175 | 8.99E-13 | Granulocytes Ube2e1      |
| 6.51E-17 | -0.4947087 | 0.016 | 0.155 | 9.22E-13 | Granulocytes Luc7l       |
| 6.75E-17 | 1.12529124 | 0.254 | 0.14  | 9.56E-13 | Granulocytes Pxn         |
| 6.92E-17 | -0.5117492 | 0.016 | 0.155 | 9.79E-13 | Granulocytes Srrt        |
| 6.98E-17 | -0.425537  | 0.065 | 0.237 | 9.88E-13 | Granulocytes Baz1a       |
| 7.08E-17 | -0.4001231 | 0.043 | 0.203 | 1.00E-12 | Granulocytes Supt5       |
| 7.16E-17 | -0.3872695 | 0.055 | 0.221 | 1.01E-12 | Granulocytes Polr2c      |
| 7.17E-17 | -0.3781504 | 0.057 | 0.227 | 1.01E-12 | Granulocytes Rnf166      |
| 7.67E-17 | -0.4675725 | 0.008 | 0.14  | 1.09E-12 | Granulocytes Mrpl11      |
| 7.67E-17 | -0.4473235 | 0.006 | 0.137 | 1.09E-12 | Granulocytes Tex264      |
| 8.07E-17 | -0.6357455 | 0.045 | 0.205 | 1.14E-12 | Granulocytes Eea1        |
| 8.07E-17 | -0.4157835 | 0.008 | 0.141 | 1.14E-12 | Granulocytes Faim        |
| 8.12E-17 | -0.3216035 | 0.045 | 0.204 | 1.15E-12 | Granulocytes Commd1      |
| 8.25E-17 | -0.4807921 | 0.022 | 0.164 | 1.17E-12 | Granulocytes Pqbp1       |
| 8.26E-17 | -0.552436  | 0.008 | 0.141 | 1.17E-12 | Granulocytes Trim35      |
| 8.62E-17 | -0.4541433 | 0.022 | 0.165 | 1.22E-12 | Granulocytes Yif1b       |
| 8.69E-17 | 1.36582122 | 0.417 | 0.313 | 1.23E-12 | Granulocytes Cxcr4       |
| 8.79E-17 | -0.4164436 | 0.016 | 0.155 | 1.24E-12 | Granulocytes Comt        |
| 8.80E-17 | 1.06901136 | 0.372 | 0.254 | 1.25E-12 | Granulocytes Syk         |
| 9.05E-17 | -0.4041656 | 0.047 | 0.207 | 1.28E-12 | Granulocytes Pin4        |
| 9.07E-17 | -0.4512931 | 0.321 | 0.587 | 1.28E-12 | Granulocytes Tmem50a     |
| 9.08E-17 | -0.5061757 | 0.022 | 0.166 | 1.29E-12 | Granulocytes Eml4        |
| 9.12E-17 | 1.08707815 | 0.286 | 0.17  | 1.29E-12 | Granulocytes Nadk        |
| 9.18E-17 | 1.01851457 | 0.211 | 0.104 | 1.30E-12 | Granulocytes Dck         |
| 9.39E-17 | -0.3618809 | 0.198 | 0.43  | 1.33E-12 | Granulocytes Ubxn1       |
| 9.57E-17 | 0.68597873 | 0.742 | 0.74  | 1.35E-12 | Granulocytes Ier2        |
| 9.62E-17 | -0.4071901 | 0.016 | 0.155 | 1.36E-12 | Granulocytes 2210016F16F |
| 9.98E-17 | -0.4954009 | 0.022 | 0.163 | 1.41E-12 | Granulocytes Psmc1       |
| 9.99E-17 | -0.3631651 | 0.016 | 0.155 | 1.41E-12 | Granulocytes Abhd17a     |
| 1.06E-16 | -0.5244818 | 0.029 | 0.173 | 1.51E-12 | Granulocytes Bcl7b       |
| 1.08E-16 | -0.5440498 | 0.014 | 0.15  | 1.52E-12 | Granulocytes Phf6        |
| 1.08E-16 | -0.4353173 | 0.006 | 0.136 | 1.53E-12 | Granulocytes Ccs         |
| 1.13E-16 | -0.3819702 | 0.031 | 0.181 | 1.60E-12 | Granulocytes Idh3g       |
| 1.16E-16 | -0.3434812 | 0.123 | 0.325 | 1.64E-12 | Granulocytes H13         |
| 1.19E-16 | 1.0178348  | 0.198 | 0.095 | 1.69E-12 | Granulocytes Rassf3      |
| 1.20E-16 | -0.3425546 | 0.057 | 0.222 | 1.69E-12 | Granulocytes Svbp        |
| 1.21E-16 | -0.5728869 | 0.008 | 0.138 | 1.72E-12 | Granulocytes Klhl6       |
| 1.22E-16 | -0.4808503 | 0.018 | 0.158 | 1.73E-12 | Granulocytes Akap8       |
| 1.23E-16 | -0.5089136 | 0.012 | 0.147 | 1.74E-12 | Granulocytes Siah2       |
| 1.27E-16 | -0.493137  | 0.025 | 0.168 | 1.80E-12 | Granulocytes Hnrnp       |
| 1.29E-16 | -0.4343261 | 0.053 | 0.218 | 1.83E-12 | Granulocytes Itpkb       |
| 1.39E-16 | -0.5414091 | 0.041 | 0.196 | 1.97E-12 | Granulocytes Ptpn11      |
| 1.42E-16 | -0.3787304 | 0.033 | 0.181 | 2.02E-12 | Granulocytes Polr2i      |
| 1.43E-16 | -0.3333571 | 0.07  | 0.244 | 2.03E-12 | Granulocytes BC004004    |
| 1.54E-16 | -0.5776765 | 0.006 | 0.136 | 2.18E-12 | Granulocytes Gm19585     |
| 1.54E-16 | -0.428479  | 0.027 | 0.17  | 2.18E-12 | Granulocytes Pbdc1       |

|          |            |       |       |          |                        |
|----------|------------|-------|-------|----------|------------------------|
| 1.59E-16 | -0.535869  | 0.358 | 0.602 | 2.25E-12 | Granulocytes Cd37      |
| 1.59E-16 | -0.520931  | 0.004 | 0.131 | 2.26E-12 | Granulocytes 11-Sep    |
| 1.60E-16 | -0.4395119 | 0.018 | 0.157 | 2.26E-12 | Granulocytes Mad2l1bp  |
| 1.62E-16 | -0.4055099 | 0.029 | 0.174 | 2.29E-12 | Granulocytes Zcchc17   |
| 1.66E-16 | -0.4932795 | 0.01  | 0.142 | 2.35E-12 | Granulocytes Rftn1     |
| 1.77E-16 | -1.0632487 | 0.027 | 0.167 | 2.51E-12 | Granulocytes Mafb      |
| 1.78E-16 | -0.3898989 | 0.031 | 0.179 | 2.52E-12 | Granulocytes Stx4a     |
| 1.80E-16 | -0.4538314 | 0.008 | 0.139 | 2.55E-12 | Granulocytes Prkcsb    |
| 1.81E-16 | -0.3940614 | 0.065 | 0.234 | 2.57E-12 | Granulocytes Sp110     |
| 1.82E-16 | -0.3160285 | 0.041 | 0.194 | 2.58E-12 | Granulocytes C1d       |
| 1.86E-16 | -0.5490781 | 0.016 | 0.151 | 2.63E-12 | Granulocytes Ilf2      |
| 1.87E-16 | -0.4068008 | 0.031 | 0.178 | 2.65E-12 | Granulocytes Mrps17    |
| 1.90E-16 | -0.4777573 | 0.025 | 0.166 | 2.70E-12 | Granulocytes Serpinb6a |
| 1.94E-16 | -0.3388157 | 0.045 | 0.202 | 2.74E-12 | Granulocytes Vdac1     |
| 1.97E-16 | -0.4892194 | 0.01  | 0.141 | 2.79E-12 | Granulocytes Me2       |
| 1.99E-16 | -0.30263   | 0.104 | 0.294 | 2.81E-12 | Granulocytes Sod2      |
| 1.99E-16 | -0.4554738 | 0.049 | 0.208 | 2.82E-12 | Granulocytes Cbx3      |
| 2.00E-16 | -0.460522  | 0.115 | 0.306 | 2.83E-12 | Granulocytes Mycbp2    |
| 2.06E-16 | -0.4225947 | 0.057 | 0.221 | 2.91E-12 | Granulocytes Smc1a     |
| 2.14E-16 | -0.4902219 | 0.012 | 0.145 | 3.03E-12 | Granulocytes Aars      |
| 2.17E-16 | -0.430724  | 0.016 | 0.152 | 3.08E-12 | Granulocytes Gars      |
| 2.23E-16 | -0.4168636 | 0.045 | 0.2   | 3.16E-12 | Granulocytes Ebna1bp2  |
| 2.28E-16 | -0.5340358 | 0.008 | 0.136 | 3.23E-12 | Granulocytes Gna15     |
| 2.29E-16 | -0.3479492 | 0.033 | 0.181 | 3.24E-12 | Granulocytes Arl1      |
| 2.29E-16 | -0.4709541 | 0.051 | 0.207 | 3.25E-12 | Granulocytes Rdx       |
| 2.30E-16 | -0.348821  | 0.082 | 0.259 | 3.25E-12 | Granulocytes Mrpl57    |
| 2.31E-16 | -0.4733704 | 0.008 | 0.137 | 3.27E-12 | Granulocytes Prpf19    |
| 2.61E-16 | -1.5901957 | 0.016 | 0.15  | 3.70E-12 | Granulocytes Cxcl9     |
| 2.64E-16 | -0.5508087 | 0.008 | 0.137 | 3.73E-12 | Granulocytes Cers4     |
| 2.64E-16 | -0.4891855 | 0.012 | 0.144 | 3.74E-12 | Granulocytes Mak16     |
| 2.65E-16 | -0.4169953 | 0.049 | 0.205 | 3.75E-12 | Granulocytes Dazap1    |
| 2.66E-16 | -0.5461947 | 0.006 | 0.133 | 3.76E-12 | Granulocytes Sesn3     |
| 2.66E-16 | -0.3226211 | 0.063 | 0.228 | 3.76E-12 | Granulocytes Polr2g    |
| 2.68E-16 | -0.4356225 | 0.01  | 0.14  | 3.79E-12 | Granulocytes Mrpl35    |
| 2.73E-16 | -0.7115225 | 0.008 | 0.137 | 3.87E-12 | Granulocytes Maf       |
| 2.84E-16 | -0.5744697 | 0.033 | 0.179 | 4.02E-12 | Granulocytes Ero1lb    |
| 2.85E-16 | -0.7589724 | 0.008 | 0.137 | 4.04E-12 | Granulocytes Cxcl16    |
| 2.89E-16 | -0.4425454 | 0.012 | 0.143 | 4.09E-12 | Granulocytes Cltb      |
| 2.92E-16 | -0.3781578 | 0.027 | 0.171 | 4.13E-12 | Granulocytes Eif2s3x   |
| 2.99E-16 | -0.3018392 | 0.274 | 0.54  | 4.24E-12 | Granulocytes Tomm7     |
| 3.02E-16 | -0.4161078 | 0.029 | 0.172 | 4.28E-12 | Granulocytes Ogfr      |
| 3.12E-16 | -0.5482292 | 0.027 | 0.165 | 4.42E-12 | Granulocytes Elovl5    |
| 3.17E-16 | -0.69523   | 0.012 | 0.143 | 4.49E-12 | Granulocytes Ms4a6d    |
| 3.18E-16 | -0.9900364 | 0.01  | 0.138 | 4.50E-12 | Granulocytes Fcer2a    |
| 3.25E-16 | -0.4345515 | 0.031 | 0.176 | 4.60E-12 | Granulocytes Nmt1      |
| 3.50E-16 | 0.7369804  | 0.129 | 0.048 | 4.95E-12 | Granulocytes St3gal5   |
| 3.61E-16 | -0.4219656 | 0.016 | 0.152 | 5.11E-12 | Granulocytes E2f4      |
| 3.68E-16 | 1.142341   | 0.556 | 0.525 | 5.21E-12 | Granulocytes Ppp1r15a  |

|          |            |       |       |          |                          |
|----------|------------|-------|-------|----------|--------------------------|
| 3.74E-16 | -0.9403096 | 0.004 | 0.129 | 5.30E-12 | Granulocytes Mzb1        |
| 3.78E-16 | -0.3221362 | 0.041 | 0.194 | 5.36E-12 | Granulocytes Smim11      |
| 3.91E-16 | -0.2890557 | 0.221 | 0.461 | 5.54E-12 | Granulocytes Tnfaip3     |
| 3.98E-16 | -0.6221361 | 0.008 | 0.135 | 5.63E-12 | Granulocytes Tcf4        |
| 4.12E-16 | -0.4681632 | 0.014 | 0.146 | 5.83E-12 | Granulocytes Gsto1       |
| 4.16E-16 | -0.4515588 | 0.02  | 0.157 | 5.89E-12 | Granulocytes Mtx1        |
| 4.17E-16 | -0.553333  | 0.006 | 0.131 | 5.91E-12 | Granulocytes Arl5c       |
| 4.18E-16 | 1.1624312  | 0.317 | 0.207 | 5.92E-12 | Granulocytes Anxa11      |
| 4.32E-16 | -0.3451594 | 0.063 | 0.226 | 6.11E-12 | Granulocytes Denr        |
| 4.34E-16 | -0.4053565 | 0.008 | 0.136 | 6.14E-12 | Granulocytes Clpp        |
| 4.40E-16 | 1.29527846 | 0.313 | 0.203 | 6.23E-12 | Granulocytes 7-Mar       |
| 4.44E-16 | -0.7731741 | 0.004 | 0.128 | 6.28E-12 | Granulocytes Rgs16       |
| 4.45E-16 | -0.5610492 | 0.02  | 0.156 | 6.29E-12 | Granulocytes Piezo1      |
| 4.63E-16 | -0.475103  | 0.051 | 0.206 | 6.55E-12 | Granulocytes Prpf8       |
| 4.64E-16 | -0.713607  | 0.01  | 0.139 | 6.56E-12 | Granulocytes Bag3        |
| 4.76E-16 | -0.4787249 | 0.02  | 0.156 | 6.74E-12 | Granulocytes Otulin      |
| 4.93E-16 | -0.5011126 | 0.01  | 0.138 | 6.98E-12 | Granulocytes Rabggtb     |
| 4.93E-16 | -0.5280754 | 0.016 | 0.15  | 6.98E-12 | Granulocytes Galnt6      |
| 5.06E-16 | -0.3338842 | 0.151 | 0.36  | 7.16E-12 | Granulocytes Tapbp       |
| 5.15E-16 | -0.5215458 | 0.004 | 0.127 | 7.30E-12 | Granulocytes Txndc5      |
| 5.21E-16 | -0.3035625 | 0.086 | 0.266 | 7.37E-12 | Granulocytes Maf1        |
| 5.21E-16 | -0.3585701 | 0.041 | 0.192 | 7.37E-12 | Granulocytes Siva1       |
| 5.27E-16 | 1.33547449 | 0.286 | 0.172 | 7.47E-12 | Granulocytes Rtp4        |
| 5.41E-16 | -0.4754583 | 0.008 | 0.135 | 7.66E-12 | Granulocytes Dynll2      |
| 5.54E-16 | -0.4752541 | 0.037 | 0.183 | 7.84E-12 | Granulocytes O610010K14F |
| 5.61E-16 | -0.3944539 | 0.027 | 0.168 | 7.94E-12 | Granulocytes Copb2       |
| 5.62E-16 | -0.3667803 | 0.047 | 0.201 | 7.96E-12 | Granulocytes Emc2        |
| 5.82E-16 | -0.4445393 | 0.016 | 0.149 | 8.24E-12 | Granulocytes Psmc9       |
| 5.95E-16 | -0.4530267 | 0.004 | 0.126 | 8.43E-12 | Granulocytes Eef1e1      |
| 6.08E-16 | -0.3504416 | 0.055 | 0.214 | 8.61E-12 | Granulocytes Ufm1        |
| 6.17E-16 | -0.4537538 | 0.014 | 0.144 | 8.73E-12 | Granulocytes Cnih1       |
| 6.17E-16 | -0.334043  | 0.194 | 0.421 | 8.73E-12 | Granulocytes Sf3b2       |
| 6.27E-16 | -0.3964581 | 0.025 | 0.162 | 8.87E-12 | Granulocytes Ormdl2      |
| 6.27E-16 | -0.3552272 | 0.121 | 0.313 | 8.88E-12 | Granulocytes Tmod3       |
| 6.53E-16 | -0.5149803 | 0.209 | 0.409 | 9.25E-12 | Granulocytes Ccl4        |
| 6.57E-16 | -0.4293787 | 0.012 | 0.141 | 9.31E-12 | Granulocytes Vma21       |
| 6.69E-16 | -0.4351243 | 0.112 | 0.295 | 9.47E-12 | Granulocytes Crlf3       |
| 6.70E-16 | -0.2509688 | 0.082 | 0.257 | 9.48E-12 | Granulocytes Lamtor5     |
| 6.70E-16 | -0.4712148 | 0.008 | 0.134 | 9.49E-12 | Granulocytes Dhps        |
| 6.89E-16 | -0.4069449 | 0.301 | 0.549 | 9.75E-12 | Granulocytes Prelid1     |
| 6.91E-16 | 0.73047187 | 0.579 | 0.531 | 9.79E-12 | Granulocytes Pkm         |
| 6.98E-16 | -0.3676582 | 0.016 | 0.15  | 9.88E-12 | Granulocytes Mrto4       |
| 7.02E-16 | -0.4372104 | 0.004 | 0.127 | 9.94E-12 | Granulocytes Pop4        |
| 7.21E-16 | -0.6100228 | 0.014 | 0.146 | 1.02E-11 | Granulocytes Lmna        |
| 7.39E-16 | -0.3471683 | 0.067 | 0.235 | 1.05E-11 | Granulocytes Nmi         |
| 7.52E-16 | -0.3953196 | 0.031 | 0.172 | 1.07E-11 | Granulocytes Lsm1        |
| 7.57E-16 | -0.346414  | 0.01  | 0.138 | 1.07E-11 | Granulocytes Hscb        |
| 7.81E-16 | 0.91287552 | 0.145 | 0.059 | 1.11E-11 | Granulocytes Tlr13       |

|          |            |       |       |          |                        |
|----------|------------|-------|-------|----------|------------------------|
| 8.06E-16 | -0.312819  | 0.098 | 0.282 | 1.14E-11 | Granulocytes Mrpl20    |
| 8.07E-16 | -0.348548  | 0.051 | 0.206 | 1.14E-11 | Granulocytes Szrd1     |
| 8.10E-16 | -0.4800181 | 0.039 | 0.185 | 1.15E-11 | Granulocytes Prpf4b    |
| 8.12E-16 | -0.299625  | 0.28  | 0.55  | 1.15E-11 | Granulocytes Grcc10    |
| 8.24E-16 | -0.3979808 | 0.037 | 0.184 | 1.17E-11 | Granulocytes Fxr1      |
| 8.33E-16 | -0.4969877 | 0.022 | 0.157 | 1.18E-11 | Granulocytes Oxct1     |
| 8.37E-16 | -0.3785495 | 0.037 | 0.183 | 1.18E-11 | Granulocytes Dpm2      |
| 8.55E-16 | -0.4090065 | 0.014 | 0.143 | 1.21E-11 | Granulocytes Mrpl2     |
| 8.66E-16 | -0.5074514 | 0.006 | 0.13  | 1.23E-11 | Granulocytes Sla2      |
| 8.68E-16 | -0.3962064 | 0.037 | 0.184 | 1.23E-11 | Granulocytes Gtf2f1    |
| 9.13E-16 | -0.3747452 | 0.022 | 0.157 | 1.29E-11 | Granulocytes Wdr61     |
| 9.75E-16 | -0.4163647 | 0.004 | 0.125 | 1.38E-11 | Granulocytes Il3ra     |
| 1.01E-15 | -1.0045277 | 0.006 | 0.128 | 1.44E-11 | Granulocytes Il7r      |
| 1.02E-15 | -0.5084646 | 0.018 | 0.149 | 1.45E-11 | Granulocytes Sreb2     |
| 1.04E-15 | -0.4144654 | 0.029 | 0.167 | 1.48E-11 | Granulocytes Elof1     |
| 1.06E-15 | -0.354975  | 0.033 | 0.178 | 1.50E-11 | Granulocytes Psen2     |
| 1.09E-15 | -0.5797223 | 0     | 0.118 | 1.54E-11 | Granulocytes Tbx21     |
| 1.09E-15 | -0.4288438 | 0.016 | 0.147 | 1.55E-11 | Granulocytes Mrpl9     |
| 1.13E-15 | -0.4961544 | 0.055 | 0.213 | 1.59E-11 | Granulocytes Pik3r1    |
| 1.13E-15 | -0.3063507 | 0.166 | 0.379 | 1.61E-11 | Granulocytes Uqcr11    |
| 1.18E-15 | -0.4530498 | 0.018 | 0.15  | 1.67E-11 | Granulocytes Flt3l     |
| 1.22E-15 | -0.4542289 | 0.022 | 0.156 | 1.73E-11 | Granulocytes Gtf3c6    |
| 1.24E-15 | -0.7013605 | 0.012 | 0.138 | 1.76E-11 | Granulocytes Blnk      |
| 1.25E-15 | -0.4403653 | 0.01  | 0.136 | 1.77E-11 | Granulocytes Rce1      |
| 1.25E-15 | -0.8246583 | 0.012 | 0.139 | 1.77E-11 | Granulocytes Tmem176b  |
| 1.28E-15 | -0.4196861 | 0.006 | 0.128 | 1.81E-11 | Granulocytes Rpp25l    |
| 1.28E-15 | -0.8645283 | 0.008 | 0.132 | 1.82E-11 | Granulocytes Gzmk      |
| 1.29E-15 | -0.8472212 | 0.006 | 0.127 | 1.82E-11 | Granulocytes Blk       |
| 1.32E-15 | -0.7561093 | 0.002 | 0.12  | 1.87E-11 | Granulocytes Serpinb6b |
| 1.35E-15 | -0.3600989 | 0.018 | 0.152 | 1.91E-11 | Granulocytes Nsmce2    |
| 1.40E-15 | -0.3430261 | 0.059 | 0.22  | 1.99E-11 | Granulocytes Wdr33     |
| 1.42E-15 | -0.6946571 | 0.012 | 0.137 | 2.01E-11 | Granulocytes Hvcn1     |
| 1.45E-15 | -0.4021308 | 0.076 | 0.245 | 2.06E-11 | Granulocytes Psip1     |
| 1.46E-15 | -0.3014482 | 0.07  | 0.234 | 2.06E-11 | Granulocytes Eif1b     |
| 1.47E-15 | -0.509644  | 0.022 | 0.155 | 2.09E-11 | Granulocytes Rsb1      |
| 1.50E-15 | 1.29162547 | 0.209 | 0.106 | 2.12E-11 | Granulocytes Basp1     |
| 1.51E-15 | 1.00094122 | 0.213 | 0.11  | 2.14E-11 | Granulocytes Pnkp      |
| 1.52E-15 | -0.4202891 | 0.043 | 0.19  | 2.15E-11 | Granulocytes Erp44     |
| 1.54E-15 | -0.5333878 | 0.01  | 0.134 | 2.18E-11 | Granulocytes Klk8      |
| 1.59E-15 | -0.343667  | 0.057 | 0.216 | 2.25E-11 | Granulocytes Rad21     |
| 1.60E-15 | -0.4359497 | 0.006 | 0.127 | 2.26E-11 | Granulocytes Gar1      |
| 1.60E-15 | -0.4432407 | 0.006 | 0.128 | 2.27E-11 | Granulocytes Atic      |
| 1.61E-15 | -0.4750552 | 0.031 | 0.17  | 2.28E-11 | Granulocytes Smc3      |
| 1.62E-15 | -0.3017088 | 0.055 | 0.21  | 2.29E-11 | Granulocytes Tmco1     |
| 1.72E-15 | -0.4644877 | 0.018 | 0.149 | 2.44E-11 | Granulocytes Yrdc      |
| 1.74E-15 | -0.4908581 | 0.006 | 0.127 | 2.46E-11 | Granulocytes Lman1     |
| 1.80E-15 | -0.4085983 | 0.035 | 0.178 | 2.55E-11 | Granulocytes Hmga1     |
| 1.81E-15 | -0.4610749 | 0.008 | 0.131 | 2.56E-11 | Granulocytes Ncor2     |

|          |            |       |       |          |                         |
|----------|------------|-------|-------|----------|-------------------------|
| 1.88E-15 | -0.394659  | 0.01  | 0.135 | 2.66E-11 | Granulocytes Lage3      |
| 1.93E-15 | -0.398016  | 0.022 | 0.157 | 2.73E-11 | Granulocytes Aggf1      |
| 1.94E-15 | -0.505121  | 0.041 | 0.185 | 2.75E-11 | Granulocytes Snx9       |
| 1.94E-15 | 0.42309331 | 0.838 | 0.801 | 2.75E-11 | Granulocytes Cyba       |
| 1.95E-15 | -0.4976621 | 0.039 | 0.181 | 2.76E-11 | Granulocytes Nasp       |
| 1.96E-15 | -0.468544  | 0.016 | 0.143 | 2.78E-11 | Granulocytes Smarcb1    |
| 1.97E-15 | -0.3285849 | 0.006 | 0.127 | 2.79E-11 | Granulocytes Polr2h     |
| 2.00E-15 | -0.5172475 | 0.018 | 0.147 | 2.83E-11 | Granulocytes Supt16     |
| 2.21E-15 | -0.4591344 | 0.006 | 0.127 | 3.13E-11 | Granulocytes Cd2ap      |
| 2.21E-15 | -0.2829688 | 0.092 | 0.268 | 3.14E-11 | Granulocytes Chic2      |
| 2.24E-15 | -0.5596312 | 0.01  | 0.133 | 3.17E-11 | Granulocytes Gbp4       |
| 2.25E-15 | 1.0142618  | 0.309 | 0.197 | 3.19E-11 | Granulocytes Dok3       |
| 2.31E-15 | -0.3463731 | 0.025 | 0.159 | 3.27E-11 | Granulocytes Alyref     |
| 2.32E-15 | -0.292555  | 0.057 | 0.215 | 3.28E-11 | Granulocytes Pin1       |
| 2.33E-15 | -0.3951061 | 0.02  | 0.151 | 3.30E-11 | Granulocytes Mrpl41     |
| 2.39E-15 | -0.3860027 | 0.045 | 0.195 | 3.38E-11 | Granulocytes Gbbp1      |
| 2.62E-15 | -0.4790941 | 0.008 | 0.129 | 3.71E-11 | Granulocytes Eftud2     |
| 2.65E-15 | -0.427858  | 0.047 | 0.195 | 3.75E-11 | Granulocytes 1700123O20 |
| 2.65E-15 | -0.3663555 | 0.018 | 0.149 | 3.75E-11 | Granulocytes Josd2      |
| 2.73E-15 | -0.4275801 | 0.004 | 0.122 | 3.86E-11 | Granulocytes Rpa1       |
| 2.77E-15 | -0.5830662 | 0.566 | 0.758 | 3.92E-11 | Granulocytes Ucp2       |
| 2.81E-15 | -0.4150922 | 0.039 | 0.182 | 3.98E-11 | Granulocytes Susd3      |
| 2.81E-15 | -0.5060406 | 0.01  | 0.134 | 3.98E-11 | Granulocytes Dnmt1      |
| 2.88E-15 | -0.7138943 | 0.02  | 0.149 | 4.07E-11 | Granulocytes Rrad       |
| 2.89E-15 | -0.4089091 | 0     | 0.114 | 4.09E-11 | Granulocytes Bcap29     |
| 2.99E-15 | -0.4315178 | 0.025 | 0.157 | 4.23E-11 | Granulocytes Parl       |
| 3.08E-15 | -0.4440009 | 0.037 | 0.177 | 4.36E-11 | Granulocytes 5-Mar      |
| 3.15E-15 | -0.6988011 | 0.02  | 0.149 | 4.47E-11 | Granulocytes Ccr2       |
| 3.27E-15 | -0.3971175 | 0.012 | 0.137 | 4.63E-11 | Granulocytes Trnau1ap   |
| 3.28E-15 | -0.3527426 | 0.074 | 0.236 | 4.65E-11 | Granulocytes Mapk1      |
| 3.29E-15 | 0.40353311 | 0.857 | 0.863 | 4.65E-11 | Granulocytes Coro1a     |
| 3.31E-15 | -0.3676042 | 0.02  | 0.15  | 4.69E-11 | Granulocytes Sdhc       |
| 3.37E-15 | -0.4954822 | 0.012 | 0.135 | 4.78E-11 | Granulocytes Ptpn7      |
| 3.54E-15 | -0.4369035 | 0.012 | 0.135 | 5.01E-11 | Granulocytes Ppie       |
| 3.64E-15 | -0.46831   | 0.025 | 0.155 | 5.15E-11 | Granulocytes Mgat2      |
| 3.69E-15 | -0.4302024 | 0.025 | 0.157 | 5.23E-11 | Granulocytes Usp1       |
| 3.80E-15 | -0.3961598 | 0.043 | 0.188 | 5.38E-11 | Granulocytes Rbm17      |
| 3.83E-15 | -0.4758337 | 0.035 | 0.173 | 5.43E-11 | Granulocytes Blvrb      |
| 3.84E-15 | -0.3349051 | 0.029 | 0.166 | 5.43E-11 | Granulocytes Anapc16    |
| 3.84E-15 | -0.5253232 | 0.004 | 0.122 | 5.44E-11 | Granulocytes Cd226      |
| 3.99E-15 | -0.3201976 | 0.047 | 0.195 | 5.65E-11 | Granulocytes Trappc1    |
| 4.15E-15 | -0.3931534 | 0.047 | 0.193 | 5.87E-11 | Granulocytes Mrps23     |
| 4.17E-15 | -0.4896107 | 0.004 | 0.12  | 5.91E-11 | Granulocytes Fam189b    |
| 4.28E-15 | -0.3815022 | 0.035 | 0.175 | 6.06E-11 | Granulocytes Tpd52l2    |
| 4.34E-15 | -0.4073579 | 0.047 | 0.194 | 6.14E-11 | Granulocytes Ep400      |
| 4.37E-15 | -0.4690796 | 0.008 | 0.128 | 6.18E-11 | Granulocytes Mrpl38     |
| 4.38E-15 | -0.3679182 | 0.098 | 0.274 | 6.21E-11 | Granulocytes Tnfaip8    |
| 4.57E-15 | -0.4207598 | 0.012 | 0.134 | 6.47E-11 | Granulocytes Tmem242    |

|          |            |       |       |          |                        |
|----------|------------|-------|-------|----------|------------------------|
| 4.58E-15 | -0.4183432 | 0.031 | 0.168 | 6.48E-11 | Granulocytes Ppil2     |
| 4.63E-15 | -0.4428217 | 0.601 | 0.82  | 6.56E-11 | Granulocytes Laptm5    |
| 4.68E-15 | -0.4539734 | 0.072 | 0.23  | 6.63E-11 | Granulocytes Bptf      |
| 4.74E-15 | 1.04261343 | 0.397 | 0.297 | 6.71E-11 | Granulocytes Tspan13   |
| 4.76E-15 | -0.4265837 | 0.025 | 0.157 | 6.74E-11 | Granulocytes Xaf1      |
| 4.85E-15 | -0.3643152 | 0.025 | 0.156 | 6.87E-11 | Granulocytes Pabpn1    |
| 4.89E-15 | -0.4292242 | 0.049 | 0.195 | 6.92E-11 | Granulocytes Hdlbp     |
| 4.95E-15 | -0.4656396 | 0.037 | 0.179 | 7.01E-11 | Granulocytes Huwe1     |
| 4.96E-15 | -0.3688858 | 0.037 | 0.177 | 7.02E-11 | Granulocytes Dcps      |
| 4.97E-15 | -0.3252627 | 0.078 | 0.243 | 7.04E-11 | Granulocytes Fli1      |
| 4.98E-15 | -0.4701906 | 0.045 | 0.19  | 7.05E-11 | Granulocytes Plec      |
| 5.02E-15 | -0.2809942 | 0.045 | 0.192 | 7.11E-11 | Granulocytes Eif4e     |
| 5.18E-15 | -0.3934915 | 0.027 | 0.161 | 7.34E-11 | Granulocytes Cdv3      |
| 5.19E-15 | -0.4204651 | 0.012 | 0.134 | 7.35E-11 | Granulocytes Tomm40    |
| 5.28E-15 | -0.4610447 | 0.033 | 0.17  | 7.47E-11 | Granulocytes Tnks2     |
| 5.44E-15 | -0.641089  | 0.008 | 0.126 | 7.71E-11 | Granulocytes Trp53i11  |
| 5.50E-15 | -0.4944496 | 0.053 | 0.202 | 7.78E-11 | Granulocytes Rinl      |
| 5.52E-15 | -0.3105871 | 0.094 | 0.267 | 7.81E-11 | Granulocytes Psm13     |
| 5.60E-15 | -0.3845584 | 0.072 | 0.23  | 7.93E-11 | Granulocytes Zdhhc20   |
| 5.65E-15 | -0.285958  | 0.063 | 0.221 | 8.01E-11 | Granulocytes Dap       |
| 5.66E-15 | -0.3833584 | 0.035 | 0.172 | 8.01E-11 | Granulocytes Nucb1     |
| 5.67E-15 | 1.00209135 | 0.221 | 0.117 | 8.02E-11 | Granulocytes Slc11a1   |
| 5.68E-15 | -0.4003648 | 0.041 | 0.183 | 8.04E-11 | Granulocytes Sirt2     |
| 5.78E-15 | -0.4260231 | 0.027 | 0.16  | 8.18E-11 | Granulocytes Hadhb     |
| 5.85E-15 | -0.38267   | 0.002 | 0.116 | 8.28E-11 | Granulocytes Ybx3      |
| 5.91E-15 | -0.3833245 | 0.002 | 0.116 | 8.36E-11 | Granulocytes Hint2     |
| 5.92E-15 | -0.4405529 | 0.065 | 0.22  | 8.39E-11 | Granulocytes Hopx      |
| 6.02E-15 | -0.3874615 | 0.01  | 0.131 | 8.52E-11 | Granulocytes Nenf      |
| 6.14E-15 | -0.4783149 | 0.014 | 0.138 | 8.69E-11 | Granulocytes Tspan32   |
| 6.30E-15 | 0.90980316 | 0.209 | 0.105 | 8.91E-11 | Granulocytes Actn1     |
| 6.36E-15 | -0.3657131 | 0.039 | 0.179 | 9.01E-11 | Granulocytes B3gnt2    |
| 6.48E-15 | -0.434305  | 0.014 | 0.136 | 9.17E-11 | Granulocytes Tufm      |
| 6.63E-15 | -0.4464241 | 0.016 | 0.139 | 9.39E-11 | Granulocytes Ubl4a     |
| 6.64E-15 | -0.462014  | 0.002 | 0.115 | 9.39E-11 | Granulocytes Tex30     |
| 6.78E-15 | -0.4278233 | 0.051 | 0.199 | 9.60E-11 | Granulocytes Nap114    |
| 6.90E-15 | -0.4238311 | 0.012 | 0.134 | 9.77E-11 | Granulocytes D5Ert579e |
| 7.17E-15 | -0.5757207 | 0.027 | 0.158 | 1.01E-10 | Granulocytes Ddit4     |
| 7.19E-15 | -0.420383  | 0.016 | 0.14  | 1.02E-10 | Granulocytes Pcd2      |
| 7.26E-15 | -0.4072494 | 0.008 | 0.126 | 1.03E-10 | Granulocytes Dcp2      |
| 7.31E-15 | -0.4399912 | 0.016 | 0.14  | 1.04E-10 | Granulocytes Sf3a3     |
| 7.40E-15 | -0.4172825 | 0.018 | 0.145 | 1.05E-10 | Granulocytes Cops2     |
| 7.74E-15 | -0.3558788 | 0.031 | 0.166 | 1.10E-10 | Granulocytes Nosip     |
| 7.80E-15 | -0.4540722 | 0.059 | 0.212 | 1.10E-10 | Granulocytes Pcmt1     |
| 8.17E-15 | -0.6465001 | 0.029 | 0.161 | 1.16E-10 | Granulocytes Dmx1      |
| 8.29E-15 | 0.91063984 | 0.151 | 0.065 | 1.17E-10 | Granulocytes Rab31     |
| 8.31E-15 | -0.5117152 | 0.07  | 0.227 | 1.18E-10 | Granulocytes Rnf125    |
| 8.43E-15 | -0.4949726 | 0.055 | 0.202 | 1.19E-10 | Granulocytes Dgka      |
| 8.56E-15 | -0.4414794 | 0.02  | 0.147 | 1.21E-10 | Granulocytes Rfk       |

|          |            |       |       |          |                          |
|----------|------------|-------|-------|----------|--------------------------|
| 8.61E-15 | -0.3660773 | 0.035 | 0.172 | 1.22E-10 | Granulocytes Gusb        |
| 8.62E-15 | -0.5363667 | 0.01  | 0.129 | 1.22E-10 | Granulocytes Gimap8      |
| 8.64E-15 | -0.4452371 | 0.012 | 0.132 | 1.22E-10 | Granulocytes Vcpkmt      |
| 8.77E-15 | -0.3300747 | 0.061 | 0.214 | 1.24E-10 | Granulocytes Ube2f       |
| 8.93E-15 | -0.4949713 | 0.022 | 0.149 | 1.26E-10 | Granulocytes Wasl        |
| 8.98E-15 | -0.4476202 | 0.02  | 0.146 | 1.27E-10 | Granulocytes Nudcd3      |
| 9.05E-15 | -0.4128762 | 0.022 | 0.151 | 1.28E-10 | Granulocytes Stt3a       |
| 9.33E-15 | 1.0723055  | 0.262 | 0.155 | 1.32E-10 | Granulocytes Skap2       |
| 9.52E-15 | -0.3821402 | 0.074 | 0.231 | 1.35E-10 | Granulocytes Sharpin     |
| 9.53E-15 | -0.288043  | 0.043 | 0.187 | 1.35E-10 | Granulocytes Glrx2       |
| 9.71E-15 | -0.4275661 | 0.006 | 0.121 | 1.37E-10 | Granulocytes Pea15a      |
| 9.90E-15 | -0.4692466 | 0.016 | 0.14  | 1.40E-10 | Granulocytes 2310033P09F |
| 1.00E-14 | -0.3352096 | 0.031 | 0.165 | 1.42E-10 | Granulocytes Cs          |
| 1.01E-14 | -0.42367   | 0.049 | 0.194 | 1.43E-10 | Granulocytes Dync1h1     |
| 1.06E-14 | -0.5196325 | 0.008 | 0.126 | 1.50E-10 | Granulocytes Ppp1r16b    |
| 1.07E-14 | -0.3471724 | 0.012 | 0.134 | 1.51E-10 | Granulocytes 1500011B03I |
| 1.09E-14 | -0.3812651 | 0.012 | 0.133 | 1.54E-10 | Granulocytes Nubp2       |
| 1.09E-14 | -0.4035364 | 0.008 | 0.125 | 1.55E-10 | Granulocytes Capn2       |
| 1.09E-14 | -0.4158657 | 0.016 | 0.141 | 1.55E-10 | Granulocytes Errfi1      |
| 1.09E-14 | -0.4412548 | 0.02  | 0.146 | 1.55E-10 | Granulocytes Ddb1        |
| 1.11E-14 | -0.4333096 | 0.016 | 0.139 | 1.58E-10 | Granulocytes Tigd2       |
| 1.13E-14 | -0.4604356 | 0.025 | 0.154 | 1.60E-10 | Granulocytes Spint2      |
| 1.17E-14 | -0.4841965 | 0.022 | 0.15  | 1.66E-10 | Granulocytes Csnk1g3     |
| 1.18E-14 | -0.3857485 | 0.027 | 0.157 | 1.66E-10 | Granulocytes Atraid      |
| 1.18E-14 | -0.4241492 | 0.02  | 0.145 | 1.68E-10 | Granulocytes Pigt        |
| 1.23E-14 | -0.5254079 | 0.041 | 0.18  | 1.74E-10 | Granulocytes Irf5        |
| 1.23E-14 | -0.322253  | 0.029 | 0.161 | 1.74E-10 | Granulocytes Rab18       |
| 1.25E-14 | -0.4632843 | 0.006 | 0.12  | 1.77E-10 | Granulocytes Dok2        |
| 1.37E-14 | -0.3280896 | 0.029 | 0.16  | 1.94E-10 | Granulocytes Imp4        |
| 1.38E-14 | -0.4262014 | 0.059 | 0.21  | 1.95E-10 | Granulocytes Nfkb1       |
| 1.38E-14 | -0.3117861 | 0.129 | 0.315 | 1.95E-10 | Granulocytes Coro1b      |
| 1.39E-14 | -0.42639   | 0.004 | 0.117 | 1.97E-10 | Granulocytes Psmg2       |
| 1.39E-14 | -0.3500137 | 0.031 | 0.164 | 1.97E-10 | Granulocytes Cops5       |
| 1.41E-14 | -0.3896253 | 0.016 | 0.139 | 2.00E-10 | Granulocytes Bcl7c       |
| 1.43E-14 | -0.459161  | 0.012 | 0.131 | 2.02E-10 | Granulocytes Naa15       |
| 1.44E-14 | -0.4174831 | 0.025 | 0.153 | 2.04E-10 | Granulocytes Ciapin1     |
| 1.49E-14 | -0.3755035 | 0.016 | 0.139 | 2.11E-10 | Granulocytes Gmps        |
| 1.49E-14 | -0.4015529 | 0.002 | 0.113 | 2.11E-10 | Granulocytes Afg3l1      |
| 1.52E-14 | -0.3941973 | 0.039 | 0.176 | 2.15E-10 | Granulocytes Rraga       |
| 1.52E-14 | -0.2876532 | 0.047 | 0.191 | 2.16E-10 | Granulocytes Mrpl17      |
| 1.53E-14 | -0.3167461 | 0.039 | 0.176 | 2.16E-10 | Granulocytes Stx8        |
| 1.55E-14 | -0.3173659 | 0.086 | 0.252 | 2.19E-10 | Granulocytes Scamp2      |
| 1.59E-14 | -0.3810206 | 0.029 | 0.16  | 2.25E-10 | Granulocytes Dguok       |
| 1.61E-14 | -0.512316  | 0.006 | 0.12  | 2.28E-10 | Granulocytes Jakmip1     |
| 1.62E-14 | -0.5074142 | 0.025 | 0.149 | 2.30E-10 | Granulocytes Galnt1      |
| 1.63E-14 | -0.331095  | 0.02  | 0.146 | 2.31E-10 | Granulocytes Emc8        |
| 1.64E-14 | -0.4442173 | 0.029 | 0.159 | 2.32E-10 | Granulocytes Oat         |
| 1.66E-14 | 1.10810053 | 0.354 | 0.258 | 2.36E-10 | Granulocytes Ppp1r2      |



|          |            |       |       |          |                        |
|----------|------------|-------|-------|----------|------------------------|
| 1.67E-14 | -0.2514475 | 0.141 | 0.336 | 2.37E-10 | Granulocytes Sys1      |
| 1.69E-14 | -0.3938455 | 0.02  | 0.145 | 2.39E-10 | Granulocytes Abhd12    |
| 1.78E-14 | -0.2952028 | 0.057 | 0.208 | 2.53E-10 | Granulocytes Anapc13   |
| 1.91E-14 | -0.5131954 | 0.022 | 0.147 | 2.70E-10 | Granulocytes BC028528  |
| 1.93E-14 | -0.357717  | 0.096 | 0.266 | 2.73E-10 | Granulocytes Gpr65     |
| 1.95E-14 | -0.3981168 | 0.002 | 0.112 | 2.75E-10 | Granulocytes Psph      |
| 1.97E-14 | 0.77415309 | 0.395 | 0.277 | 2.79E-10 | Granulocytes Emb       |
| 2.00E-14 | -0.380828  | 0.008 | 0.124 | 2.83E-10 | Granulocytes Rbm28     |
| 2.02E-14 | -0.4532236 | 0.008 | 0.123 | 2.86E-10 | Granulocytes Lime1     |
| 2.06E-14 | -0.435281  | 0.037 | 0.171 | 2.91E-10 | Granulocytes Dnttip2   |
| 2.10E-14 | -0.4033798 | 0.014 | 0.134 | 2.97E-10 | Granulocytes Hint3     |
| 2.15E-14 | -0.6869728 | 0.004 | 0.115 | 3.05E-10 | Granulocytes Ccr8      |
| 2.16E-14 | -0.4705055 | 0.004 | 0.115 | 3.06E-10 | Granulocytes Mdfic     |
| 2.20E-14 | -0.4221058 | 0.037 | 0.171 | 3.11E-10 | Granulocytes Kmt2a     |
| 2.21E-14 | -0.810489  | 0.01  | 0.125 | 3.13E-10 | Granulocytes Fcrla     |
| 2.27E-14 | -0.3851426 | 0.029 | 0.157 | 3.22E-10 | Granulocytes Tmem11    |
| 2.28E-14 | -0.5405519 | 0.012 | 0.129 | 3.23E-10 | Granulocytes Nup210    |
| 2.40E-14 | -0.3214354 | 0.029 | 0.159 | 3.40E-10 | Granulocytes Commd6    |
| 2.44E-14 | -0.4970794 | 0.012 | 0.129 | 3.45E-10 | Granulocytes Cdk6      |
| 2.46E-14 | -0.4071232 | 0.025 | 0.149 | 3.49E-10 | Granulocytes Glo1      |
| 2.47E-14 | -0.8041172 | 0.004 | 0.115 | 3.50E-10 | Granulocytes Serpinb9  |
| 2.48E-14 | -0.4285065 | 0.006 | 0.118 | 3.52E-10 | Granulocytes Smco4     |
| 2.48E-14 | -0.3835141 | 0.022 | 0.147 | 3.52E-10 | Granulocytes Rsl24d1   |
| 2.49E-14 | -0.3778597 | 0.025 | 0.151 | 3.52E-10 | Granulocytes Commd2    |
| 2.52E-14 | -0.36742   | 0.02  | 0.144 | 3.56E-10 | Granulocytes Wdr43     |
| 2.53E-14 | -0.4796986 | 0.016 | 0.135 | 3.58E-10 | Granulocytes Mphosph10 |
| 2.54E-14 | -0.3800211 | 0.004 | 0.115 | 3.60E-10 | Granulocytes Elp5      |
| 2.55E-14 | -0.5625173 | 0.01  | 0.126 | 3.60E-10 | Granulocytes Fcgr1     |
| 2.55E-14 | -0.3873974 | 0.022 | 0.147 | 3.61E-10 | Granulocytes Eif1ad    |
| 2.56E-14 | -0.487828  | 0.053 | 0.194 | 3.63E-10 | Granulocytes Amd1      |
| 2.59E-14 | -0.4280832 | 0.043 | 0.181 | 3.67E-10 | Granulocytes Dcaf7     |
| 2.60E-14 | -0.3135309 | 0.031 | 0.164 | 3.68E-10 | Granulocytes Chtop     |
| 2.68E-14 | -0.4348525 | 0.059 | 0.207 | 3.80E-10 | Granulocytes Ifnar1    |
| 2.69E-14 | 0.49338446 | 0.957 | 0.961 | 3.81E-10 | Granulocytes H3f3b     |
| 2.77E-14 | -0.3599445 | 0.004 | 0.114 | 3.92E-10 | Granulocytes Mrps30    |
| 2.79E-14 | -0.4833359 | 0.033 | 0.164 | 3.95E-10 | Granulocytes P4ha1     |
| 2.86E-14 | -0.4523979 | 0.012 | 0.13  | 4.05E-10 | Granulocytes Cep57     |
| 3.17E-14 | 1.00063054 | 0.264 | 0.157 | 4.48E-10 | Granulocytes Gm26740   |
| 3.21E-14 | -0.4056138 | 0.012 | 0.129 | 4.55E-10 | Granulocytes Acat1     |
| 3.25E-14 | -0.2963849 | 0.045 | 0.184 | 4.60E-10 | Granulocytes Ppp2r2a   |
| 3.31E-14 | -0.4072056 | 0.027 | 0.153 | 4.68E-10 | Granulocytes Uba2      |
| 3.49E-14 | -0.354883  | 0.053 | 0.196 | 4.95E-10 | Granulocytes Tiprl     |
| 3.57E-14 | -0.4904645 | 0.012 | 0.129 | 5.05E-10 | Granulocytes Cx3cr1    |
| 3.58E-14 | -0.4228959 | 0.047 | 0.186 | 5.07E-10 | Granulocytes Pbrm1     |
| 3.59E-14 | -0.3442133 | 0.047 | 0.186 | 5.09E-10 | Granulocytes Emc3      |
| 3.61E-14 | -0.26788   | 0.057 | 0.204 | 5.10E-10 | Granulocytes Gtf2a2    |
| 3.62E-14 | -0.4379648 | 0.049 | 0.189 | 5.12E-10 | Granulocytes Krit1     |
| 3.72E-14 | -0.2642454 | 0.049 | 0.193 | 5.26E-10 | Granulocytes Cdc26     |

|          |            |       |       |          |                       |
|----------|------------|-------|-------|----------|-----------------------|
| 3.74E-14 | -0.2857721 | 0.043 | 0.183 | 5.30E-10 | Granulocytes Pfkp     |
| 3.86E-14 | -0.5793218 | 0.014 | 0.131 | 5.47E-10 | Granulocytes Traf4    |
| 3.89E-14 | -0.3624406 | 0.006 | 0.118 | 5.50E-10 | Granulocytes Mrps9    |
| 4.03E-14 | -0.3798887 | 0.092 | 0.254 | 5.71E-10 | Granulocytes Nfatc1   |
| 4.06E-14 | -0.3287581 | 0.061 | 0.211 | 5.75E-10 | Granulocytes Nxf1     |
| 4.12E-14 | -0.2960366 | 0.049 | 0.19  | 5.83E-10 | Granulocytes Otub1    |
| 4.16E-14 | -0.445485  | 0.014 | 0.132 | 5.89E-10 | Granulocytes Ccdc117  |
| 4.19E-14 | -0.3883455 | 0.029 | 0.157 | 5.94E-10 | Granulocytes Aco2     |
| 4.23E-14 | -0.4235263 | 0.027 | 0.152 | 5.99E-10 | Granulocytes Ivns1abp |
| 4.24E-14 | -0.4104353 | 0.008 | 0.119 | 6.00E-10 | Granulocytes Zfp593   |
| 4.26E-14 | -0.3862727 | 0.022 | 0.146 | 6.03E-10 | Granulocytes Zfp91    |
| 4.33E-14 | 0.70685171 | 0.72  | 0.747 | 6.12E-10 | Granulocytes Ubc      |
| 4.37E-14 | -0.3620607 | 0.112 | 0.284 | 6.19E-10 | Granulocytes Tmem123  |
| 4.39E-14 | -0.7525788 | 0.008 | 0.12  | 6.21E-10 | Granulocytes Ikzf2    |
| 4.39E-14 | -0.4332863 | 0.029 | 0.156 | 6.21E-10 | Granulocytes Ubqln1   |
| 4.41E-14 | -0.5774724 | 0.002 | 0.109 | 6.24E-10 | Granulocytes Sytl3    |
| 4.50E-14 | -0.3904317 | 0.02  | 0.142 | 6.38E-10 | Granulocytes Pura     |
| 4.67E-14 | -0.4545315 | 0.014 | 0.131 | 6.62E-10 | Granulocytes Zfp644   |
| 4.70E-14 | -0.6586406 | 0.006 | 0.117 | 6.65E-10 | Granulocytes Fam43a   |
| 4.80E-14 | -0.2610436 | 0.078 | 0.235 | 6.79E-10 | Granulocytes Trappc2l |
| 4.89E-14 | -0.3600246 | 0.01  | 0.124 | 6.93E-10 | Granulocytes Mrps28   |
| 4.91E-14 | -0.550569  | 0.008 | 0.119 | 6.95E-10 | Granulocytes Cnn3     |
| 4.95E-14 | -0.3485686 | 0.016 | 0.135 | 7.00E-10 | Granulocytes Gps1     |
| 4.95E-14 | -0.416343  | 0.029 | 0.154 | 7.01E-10 | Granulocytes Arl4a    |
| 5.30E-14 | -0.3595284 | 0.018 | 0.137 | 7.50E-10 | Granulocytes Dtymk    |
| 5.37E-14 | -0.4631196 | 0.006 | 0.116 | 7.60E-10 | Granulocytes Ppp3cc   |
| 5.57E-14 | -0.3734868 | 0.006 | 0.116 | 7.89E-10 | Granulocytes Aarsd1   |
| 5.67E-14 | -0.4928645 | 0.01  | 0.123 | 8.03E-10 | Granulocytes Card11   |
| 5.72E-14 | -0.4144216 | 0.002 | 0.108 | 8.10E-10 | Granulocytes Rangap1  |
| 5.78E-14 | -0.2658016 | 0.078 | 0.237 | 8.18E-10 | Granulocytes Mapre2   |
| 5.78E-14 | -0.3503279 | 0.027 | 0.152 | 8.19E-10 | Granulocytes Sike1    |
| 5.80E-14 | -0.4202772 | 0.012 | 0.127 | 8.20E-10 | Granulocytes Slc38a10 |
| 5.81E-14 | -0.2552531 | 0.1   | 0.269 | 8.22E-10 | Granulocytes Lypla2   |
| 6.01E-14 | -0.4183168 | 0.006 | 0.116 | 8.51E-10 | Granulocytes Phgdh    |
| 6.07E-14 | -0.3358144 | 0.027 | 0.151 | 8.59E-10 | Granulocytes Rpl7l1   |
| 6.20E-14 | -0.3187713 | 0.076 | 0.23  | 8.78E-10 | Granulocytes Rsb1l1   |
| 6.23E-14 | -0.3309894 | 0.035 | 0.166 | 8.82E-10 | Granulocytes Rnf4     |
| 6.29E-14 | -0.3535207 | 0.037 | 0.167 | 8.90E-10 | Granulocytes Eif2b2   |
| 6.56E-14 | -0.4828025 | 0.006 | 0.115 | 9.29E-10 | Granulocytes Kcnn4    |
| 6.60E-14 | -0.4067609 | 0.043 | 0.179 | 9.34E-10 | Granulocytes Eif1a    |
| 6.74E-14 | -0.4106265 | 0.002 | 0.108 | 9.54E-10 | Granulocytes Farsb    |
| 6.74E-14 | -0.3971273 | 0.288 | 0.521 | 9.54E-10 | Granulocytes Fam107b  |
| 6.82E-14 | -0.4215337 | 0.008 | 0.119 | 9.66E-10 | Granulocytes Dr1      |
| 6.99E-14 | -0.3899143 | 0.012 | 0.125 | 9.89E-10 | Granulocytes Wdr74    |
| 7.09E-14 | -0.508718  | 0.004 | 0.111 | 1.00E-09 | Granulocytes Bcl11b   |
| 7.25E-14 | -0.3674416 | 0.027 | 0.153 | 1.03E-09 | Granulocytes Rnf6     |
| 7.37E-14 | 0.89412723 | 0.139 | 0.059 | 1.04E-09 | Granulocytes Apobr    |
| 7.99E-14 | -0.4004238 | 0.008 | 0.118 | 1.13E-09 | Granulocytes Snrnp25  |

|          |            |       |       |          |                      |
|----------|------------|-------|-------|----------|----------------------|
| 8.13E-14 | -0.3783644 | 0.031 | 0.157 | 1.15E-09 | Granulocytes Adss    |
| 8.15E-14 | -0.4076502 | 0.01  | 0.123 | 1.15E-09 | Granulocytes AtI3    |
| 8.16E-14 | -0.429511  | 0.039 | 0.169 | 1.16E-09 | Granulocytes Clint1  |
| 8.23E-14 | -0.363937  | 0.012 | 0.125 | 1.17E-09 | Granulocytes Mrpl27  |
| 8.34E-14 | -0.4473198 | 0.01  | 0.122 | 1.18E-09 | Granulocytes Pdlim1  |
| 8.37E-14 | -0.3586237 | 0.047 | 0.186 | 1.18E-09 | Granulocytes Rbm7    |
| 8.48E-14 | -0.3978625 | 0.004 | 0.111 | 1.20E-09 | Granulocytes Elk3    |
| 8.54E-14 | -0.2608249 | 0.053 | 0.196 | 1.21E-09 | Granulocytes Nabp2   |
| 9.12E-14 | -0.3433338 | 0.018 | 0.136 | 1.29E-09 | Granulocytes Psmc3   |
| 9.22E-14 | -0.402383  | 0.012 | 0.125 | 1.31E-09 | Granulocytes Fh1     |
| 9.24E-14 | -0.4798152 | 0.006 | 0.115 | 1.31E-09 | Granulocytes Tgtp2   |
| 9.29E-14 | -0.4889824 | 0.004 | 0.11  | 1.32E-09 | Granulocytes Prkcq   |
| 9.37E-14 | -0.3875427 | 0.016 | 0.132 | 1.33E-09 | Granulocytes Tapbpl  |
| 9.40E-14 | -0.4147743 | 0.004 | 0.111 | 1.33E-09 | Granulocytes Ankrd10 |
| 9.43E-14 | -0.3653841 | 0.012 | 0.125 | 1.33E-09 | Granulocytes Mrpl16  |
| 9.61E-14 | -0.4180221 | 0.002 | 0.106 | 1.36E-09 | Granulocytes Ppil1   |
| 9.66E-14 | -0.3973556 | 0.006 | 0.114 | 1.37E-09 | Granulocytes Spr     |
| 9.71E-14 | -0.3411543 | 0.039 | 0.172 | 1.37E-09 | Granulocytes Glg1    |
| 9.95E-14 | -0.4358838 | 0.008 | 0.117 | 1.41E-09 | Granulocytes Ccdc107 |
| 1.01E-13 | -0.3683905 | 0.014 | 0.129 | 1.43E-09 | Granulocytes Ddx27   |
| 1.06E-13 | -0.4416407 | 0     | 0.103 | 1.50E-09 | Granulocytes Ahr     |
| 1.07E-13 | -0.3256133 | 0.178 | 0.377 | 1.51E-09 | Granulocytes Ppp1cc  |
| 1.07E-13 | -0.6291177 | 0.008 | 0.117 | 1.52E-09 | Granulocytes Txk     |
| 1.07E-13 | -0.3136265 | 0.17  | 0.363 | 1.52E-09 | Granulocytes Stat1   |
| 1.08E-13 | -0.5127861 | 0.012 | 0.124 | 1.53E-09 | Granulocytes Cd40    |
| 1.08E-13 | -0.3645139 | 0.004 | 0.11  | 1.53E-09 | Granulocytes Apex1   |
| 1.09E-13 | -0.3673137 | 0.063 | 0.208 | 1.54E-09 | Granulocytes Acot7   |
| 1.09E-13 | -0.3182492 | 0.033 | 0.16  | 1.55E-09 | Granulocytes Smim20  |
| 1.10E-13 | -0.4203324 | 0.043 | 0.174 | 1.55E-09 | Granulocytes Hadha   |
| 1.10E-13 | -0.4686678 | 0.037 | 0.165 | 1.55E-09 | Granulocytes Igtp    |
| 1.13E-13 | -0.3848598 | 0.012 | 0.126 | 1.60E-09 | Granulocytes Qrich1  |
| 1.14E-13 | -0.3826143 | 0.008 | 0.117 | 1.61E-09 | Granulocytes Mrps25  |
| 1.17E-13 | -0.4357284 | 0.006 | 0.113 | 1.65E-09 | Granulocytes Fcgrt   |
| 1.18E-13 | 1.10596423 | 0.329 | 0.23  | 1.67E-09 | Granulocytes Tgoln1  |
| 1.21E-13 | -0.3933799 | 0.035 | 0.163 | 1.71E-09 | Granulocytes Baz1b   |
| 1.21E-13 | -0.366772  | 0.006 | 0.113 | 1.71E-09 | Granulocytes Ppih    |
| 1.22E-13 | -0.3632787 | 0.025 | 0.146 | 1.73E-09 | Granulocytes Cops4   |
| 1.25E-13 | -0.3040509 | 0.014 | 0.13  | 1.77E-09 | Granulocytes Lrrc59  |
| 1.26E-13 | -0.3799065 | 0.006 | 0.113 | 1.78E-09 | Granulocytes Timm22  |
| 1.28E-13 | -0.4082115 | 0.006 | 0.114 | 1.81E-09 | Granulocytes Sdc3    |
| 1.34E-13 | -0.3905426 | 0.012 | 0.124 | 1.90E-09 | Granulocytes Pgrmc1  |
| 1.39E-13 | -0.4074774 | 0.008 | 0.117 | 1.96E-09 | Granulocytes Rabep1  |
| 1.43E-13 | -0.4567627 | 0.006 | 0.113 | 2.03E-09 | Granulocytes Msi2    |
| 1.44E-13 | 1.04087524 | 0.282 | 0.181 | 2.04E-09 | Granulocytes Ptpre   |
| 1.45E-13 | -0.5319626 | 0.025 | 0.143 | 2.05E-09 | Granulocytes Tecpr1  |
| 1.49E-13 | -0.4514516 | 0.01  | 0.119 | 2.11E-09 | Granulocytes Padi2   |
| 1.52E-13 | -0.4590025 | 0.01  | 0.12  | 2.15E-09 | Granulocytes Pml     |
| 1.53E-13 | -0.3322849 | 0.098 | 0.262 | 2.17E-09 | Granulocytes Ccnl2   |

|          |            |       |       |          |                         |
|----------|------------|-------|-------|----------|-------------------------|
| 1.54E-13 | -0.3799879 | 0.029 | 0.152 | 2.17E-09 | Granulocytes Nek7       |
| 1.56E-13 | -0.5366942 | 0.014 | 0.125 | 2.21E-09 | Granulocytes Filip1l    |
| 1.56E-13 | -0.354636  | 0.012 | 0.124 | 2.21E-09 | Granulocytes Fnta       |
| 1.62E-13 | -0.4134654 | 0.008 | 0.116 | 2.29E-09 | Granulocytes Esf1       |
| 1.63E-13 | -0.4978575 | 0.041 | 0.17  | 2.31E-09 | Granulocytes Sgk1       |
| 1.65E-13 | -0.2902108 | 0.051 | 0.189 | 2.33E-09 | Granulocytes Tmed3      |
| 1.65E-13 | -0.3444313 | 0.006 | 0.113 | 2.34E-09 | Granulocytes Ube2v2     |
| 1.68E-13 | -0.3442743 | 0.016 | 0.131 | 2.38E-09 | Granulocytes Tgs1       |
| 1.71E-13 | -0.3539512 | 0.025 | 0.145 | 2.42E-09 | Granulocytes Taf11      |
| 1.77E-13 | -0.2623009 | 0.174 | 0.368 | 2.51E-09 | Granulocytes Sfpq       |
| 1.78E-13 | -0.3821137 | 0     | 0.101 | 2.52E-09 | Granulocytes Hars       |
| 1.79E-13 | -0.4359245 | 0.016 | 0.131 | 2.53E-09 | Granulocytes Mmd        |
| 1.84E-13 | -0.2948178 | 0.084 | 0.241 | 2.61E-09 | Granulocytes Epc1       |
| 1.86E-13 | -0.4605906 | 0.012 | 0.122 | 2.63E-09 | Granulocytes Kpna1      |
| 1.87E-13 | -0.3442991 | 0.053 | 0.191 | 2.65E-09 | Granulocytes Yipf3      |
| 1.91E-13 | -0.2998694 | 0.031 | 0.156 | 2.70E-09 | Granulocytes Btf3l4     |
| 1.91E-13 | -0.3571275 | 0.027 | 0.148 | 2.70E-09 | Granulocytes Brms1      |
| 1.93E-13 | -0.4379533 | 0.018 | 0.135 | 2.73E-09 | Granulocytes Cd6        |
| 1.96E-13 | -0.2746634 | 0.231 | 0.461 | 2.77E-09 | Granulocytes Mdh2       |
| 2.06E-13 | -0.3393098 | 0.035 | 0.162 | 2.91E-09 | Granulocytes Larp7      |
| 2.10E-13 | -0.3384985 | 0.051 | 0.187 | 2.98E-09 | Granulocytes Smim7      |
| 2.11E-13 | -0.3595108 | 0.025 | 0.145 | 2.98E-09 | Granulocytes Rhof       |
| 2.17E-13 | -0.2980489 | 0.051 | 0.189 | 3.08E-09 | Granulocytes Chfr       |
| 2.19E-13 | -0.4217978 | 0.002 | 0.104 | 3.10E-09 | Granulocytes Ezh2       |
| 2.24E-13 | -0.3915937 | 0.004 | 0.107 | 3.18E-09 | Granulocytes Tusc3      |
| 2.26E-13 | -0.3033135 | 0.031 | 0.155 | 3.20E-09 | Granulocytes Rbm22      |
| 2.26E-13 | -0.3425277 | 0.022 | 0.141 | 3.20E-09 | Granulocytes Zcchc9     |
| 2.30E-13 | -0.6615252 | 0.016 | 0.127 | 3.25E-09 | Granulocytes Ms4a4a     |
| 2.31E-13 | -0.4397664 | 0     | 0.1   | 3.27E-09 | Granulocytes Gbp8       |
| 2.32E-13 | -0.4413611 | 0.016 | 0.129 | 3.28E-09 | Granulocytes P2rx4      |
| 2.34E-13 | -0.3009146 | 0.051 | 0.188 | 3.32E-09 | Granulocytes Ctcf       |
| 2.38E-13 | -0.2755837 | 0.061 | 0.203 | 3.37E-09 | Granulocytes Nars       |
| 2.40E-13 | 0.86116986 | 0.176 | 0.086 | 3.40E-09 | Granulocytes Mirt1      |
| 2.46E-13 | 0.90067414 | 0.431 | 0.347 | 3.48E-09 | Granulocytes Sdcbp      |
| 2.47E-13 | -0.5076308 | 0.012 | 0.121 | 3.50E-09 | Granulocytes Grap2      |
| 2.48E-13 | -0.362198  | 0.006 | 0.112 | 3.51E-09 | Granulocytes Nsun2      |
| 2.48E-13 | -0.4395072 | 0.041 | 0.17  | 3.52E-09 | Granulocytes Akap9      |
| 2.51E-13 | -0.387379  | 0.035 | 0.161 | 3.56E-09 | Granulocytes Fam133b    |
| 2.52E-13 | -0.3744962 | 0.016 | 0.129 | 3.57E-09 | Granulocytes Mphosph8   |
| 2.56E-13 | -0.4664562 | 0.008 | 0.115 | 3.62E-09 | Granulocytes Slamf6     |
| 2.59E-13 | -0.3515386 | 0.049 | 0.181 | 3.66E-09 | Granulocytes Kansl1     |
| 2.70E-13 | -0.413705  | 0.016 | 0.127 | 3.82E-09 | Granulocytes Epb41l4aos |
| 2.71E-13 | -0.4561327 | 0.059 | 0.197 | 3.83E-09 | Granulocytes Cntrl      |
| 2.73E-13 | -0.3273648 | 0.049 | 0.184 | 3.87E-09 | Granulocytes Copa       |
| 2.74E-13 | -0.3898718 | 0.043 | 0.172 | 3.88E-09 | Granulocytes Chka       |
| 2.75E-13 | -0.2991056 | 0.376 | 0.622 | 3.90E-09 | Granulocytes Arf5       |
| 2.77E-13 | -0.3832441 | 0.006 | 0.111 | 3.91E-09 | Granulocytes Sfxn1      |
| 2.82E-13 | -0.3074861 | 0.029 | 0.15  | 3.99E-09 | Granulocytes Isca2      |

|          |            |       |       |          |                       |
|----------|------------|-------|-------|----------|-----------------------|
| 2.84E-13 | -0.3691355 | 0.022 | 0.139 | 4.02E-09 | Granulocytes Cyb5b    |
| 2.91E-13 | -0.3338393 | 0.016 | 0.13  | 4.12E-09 | Granulocytes Eci1     |
| 2.92E-13 | -0.4876381 | 0.006 | 0.111 | 4.14E-09 | Granulocytes Pim2     |
| 2.94E-13 | -0.4470524 | 0.006 | 0.11  | 4.16E-09 | Granulocytes Dnm1l    |
| 3.00E-13 | -0.3718296 | 0.035 | 0.161 | 4.24E-09 | Granulocytes Tomm34   |
| 3.07E-13 | -0.3672326 | 0.035 | 0.16  | 4.35E-09 | Granulocytes Tlk1     |
| 3.09E-13 | -0.4114894 | 0.002 | 0.103 | 4.37E-09 | Granulocytes Arl5a    |
| 3.10E-13 | -0.4403066 | 0.014 | 0.126 | 4.39E-09 | Granulocytes Rbl2     |
| 3.14E-13 | -0.500598  | 0.002 | 0.102 | 4.44E-09 | Granulocytes Tmem163  |
| 3.16E-13 | -0.4851806 | 0.027 | 0.145 | 4.47E-09 | Granulocytes Clcn3    |
| 3.16E-13 | -0.386756  | 0.018 | 0.131 | 4.48E-09 | Granulocytes Apopt1   |
| 3.20E-13 | -0.622342  | 0.01  | 0.116 | 4.53E-09 | Granulocytes Irf4     |
| 3.22E-13 | -0.3111129 | 0.08  | 0.231 | 4.56E-09 | Granulocytes Fnbp1    |
| 3.24E-13 | -0.4488624 | 0.008 | 0.114 | 4.58E-09 | Granulocytes Ly9      |
| 3.30E-13 | -0.6914191 | 0.031 | 0.152 | 4.67E-09 | Granulocytes Bank1    |
| 3.34E-13 | -0.2788354 | 0.022 | 0.14  | 4.73E-09 | Granulocytes Bak1     |
| 3.34E-13 | -0.3985132 | 0.035 | 0.158 | 4.73E-09 | Granulocytes Acly     |
| 3.37E-13 | -0.2882203 | 0.047 | 0.179 | 4.77E-09 | Granulocytes Ten1     |
| 3.38E-13 | -0.414514  | 0.014 | 0.124 | 4.79E-09 | Granulocytes Zfp800   |
| 3.42E-13 | -0.3955612 | 0.018 | 0.132 | 4.83E-09 | Granulocytes Gpatch8  |
| 3.43E-13 | -0.4311058 | 0.01  | 0.117 | 4.86E-09 | Granulocytes Gmn      |
| 3.45E-13 | -0.3344086 | 0.012 | 0.121 | 4.88E-09 | Granulocytes Psmf1    |
| 3.47E-13 | -0.3947881 | 0.045 | 0.176 | 4.92E-09 | Granulocytes Lmbrd1   |
| 3.58E-13 | -0.4721379 | 0.002 | 0.102 | 5.06E-09 | Granulocytes Lax1     |
| 3.67E-13 | -0.3230214 | 0.025 | 0.142 | 5.20E-09 | Granulocytes Pnkd     |
| 3.68E-13 | -0.8355939 | 0.082 | 0.224 | 5.21E-09 | Granulocytes Grn      |
| 3.70E-13 | -0.5953269 | 0.076 | 0.218 | 5.24E-09 | Granulocytes Satb1    |
| 3.75E-13 | -0.4537239 | 0.016 | 0.127 | 5.31E-09 | Granulocytes Hdac7    |
| 3.90E-13 | -0.3128616 | 0.014 | 0.125 | 5.52E-09 | Granulocytes Ube2m    |
| 3.90E-13 | -0.366137  | 0.014 | 0.125 | 5.52E-09 | Granulocytes Zfp326   |
| 3.92E-13 | -0.3761357 | 0.01  | 0.116 | 5.55E-09 | Granulocytes Mrps35   |
| 3.93E-13 | -0.4043883 | 0.008 | 0.113 | 5.57E-09 | Granulocytes Trim27   |
| 4.00E-13 | -0.723259  | 0.01  | 0.116 | 5.67E-09 | Granulocytes Scd1     |
| 4.16E-13 | -0.3643779 | 0.047 | 0.179 | 5.90E-09 | Granulocytes Map4     |
| 4.24E-13 | -0.394349  | 0.031 | 0.152 | 6.00E-09 | Granulocytes Pum1     |
| 4.29E-13 | -0.3734058 | 0.01  | 0.117 | 6.07E-09 | Granulocytes Pafah1b3 |
| 4.36E-13 | -0.3926788 | 0.094 | 0.252 | 6.17E-09 | Granulocytes Atrx     |
| 4.39E-13 | -0.6895471 | 0.004 | 0.105 | 6.21E-09 | Granulocytes Klrc1    |
| 4.47E-13 | -0.347058  | 0.018 | 0.13  | 6.32E-09 | Granulocytes Ppa1     |
| 4.48E-13 | -0.3587815 | 0.022 | 0.136 | 6.35E-09 | Granulocytes Sumo3    |
| 4.64E-13 | -0.3221399 | 0.072 | 0.219 | 6.57E-09 | Granulocytes Smg1     |
| 4.72E-13 | -0.4002038 | 0.027 | 0.143 | 6.67E-09 | Granulocytes Vezf1    |
| 4.84E-13 | -0.3784677 | 0.016 | 0.126 | 6.85E-09 | Granulocytes Nr2c2ap  |
| 4.88E-13 | -0.4031085 | 0.002 | 0.101 | 6.91E-09 | Granulocytes Uri1     |
| 5.01E-13 | -0.3883898 | 0.016 | 0.127 | 7.10E-09 | Granulocytes Med15    |
| 5.06E-13 | -0.2877262 | 0.027 | 0.146 | 7.16E-09 | Granulocytes Faf2     |
| 5.06E-13 | -0.4376222 | 0.02  | 0.133 | 7.17E-09 | Granulocytes Mgst2    |
| 5.10E-13 | -0.3602916 | 0.029 | 0.147 | 7.22E-09 | Granulocytes Nxt1     |

|          |            |       |       |          |                          |
|----------|------------|-------|-------|----------|--------------------------|
| 5.14E-13 | -0.3422214 | 0.006 | 0.109 | 7.28E-09 | Granulocytes Srm         |
| 5.21E-13 | -0.4044681 | 0.016 | 0.127 | 7.37E-09 | Granulocytes Magt1       |
| 5.22E-13 | -0.2606261 | 0.067 | 0.212 | 7.38E-09 | Granulocytes Sdha        |
| 5.30E-13 | -0.3175539 | 0.014 | 0.123 | 7.50E-09 | Granulocytes A430005L14f |
| 5.43E-13 | -0.3682332 | 0.008 | 0.112 | 7.69E-09 | Granulocytes Mphosph6    |
| 5.50E-13 | -0.2599946 | 0.067 | 0.211 | 7.79E-09 | Granulocytes Eif4g3      |
| 5.86E-13 | -0.3690195 | 0.008 | 0.112 | 8.29E-09 | Granulocytes Ddi2        |
| 5.86E-13 | -0.3379653 | 0.012 | 0.119 | 8.30E-09 | Granulocytes Mbd3        |
| 5.87E-13 | -0.3372006 | 0.031 | 0.15  | 8.31E-09 | Granulocytes Psme3       |
| 5.90E-13 | -0.4476486 | 0.041 | 0.166 | 8.36E-09 | Granulocytes Etnk1       |
| 5.91E-13 | -0.3105139 | 0.033 | 0.155 | 8.36E-09 | Granulocytes Ubxn6       |
| 5.99E-13 | -0.3676768 | 0.043 | 0.172 | 8.48E-09 | Granulocytes Fryl        |
| 5.99E-13 | -0.3256119 | 0.018 | 0.129 | 8.49E-09 | Granulocytes Mrp155      |
| 6.04E-13 | -0.486755  | 0.008 | 0.112 | 8.55E-09 | Granulocytes Cxcr3       |
| 6.14E-13 | -0.4947354 | 0.008 | 0.112 | 8.68E-09 | Granulocytes Myo1e       |
| 6.21E-13 | -0.4512846 | 0.002 | 0.1   | 8.79E-09 | Granulocytes Tcf12       |
| 6.31E-13 | 1.05536312 | 0.384 | 0.305 | 8.93E-09 | Granulocytes Coq10b      |
| 6.38E-13 | -0.3991994 | 0.012 | 0.118 | 9.03E-09 | Granulocytes Gnl3        |
| 6.50E-13 | -0.3670136 | 0.004 | 0.104 | 9.21E-09 | Granulocytes Hspbp1      |
| 6.54E-13 | -0.3962847 | 0.029 | 0.147 | 9.26E-09 | Granulocytes Cldnd1      |
| 6.58E-13 | -0.3329062 | 0.012 | 0.119 | 9.32E-09 | Granulocytes Blmh        |
| 6.61E-13 | -0.4298714 | 0.072 | 0.213 | 9.36E-09 | Granulocytes Gns         |
| 6.68E-13 | -0.2806039 | 0.059 | 0.197 | 9.46E-09 | Granulocytes Snrnp27     |
| 6.69E-13 | -0.3821723 | 0.01  | 0.115 | 9.47E-09 | Granulocytes Brcc3       |
| 6.77E-13 | -0.3491674 | 0.02  | 0.134 | 9.58E-09 | Granulocytes Sec31a      |
| 6.92E-13 | -0.3644414 | 0.016 | 0.126 | 9.80E-09 | Granulocytes Sae1        |
| 7.04E-13 | -0.3321737 | 0.041 | 0.168 | 9.96E-09 | Granulocytes Golgb1      |
| 7.29E-13 | -0.2614718 | 0.033 | 0.155 | 1.03E-08 | Granulocytes Mpv17l2     |
| 7.31E-13 | -0.3387942 | 0.018 | 0.13  | 1.03E-08 | Granulocytes Jak3        |
| 7.50E-13 | -0.2714541 | 0.08  | 0.228 | 1.06E-08 | Granulocytes Os9         |
| 7.51E-13 | -0.3955382 | 0.002 | 0.1   | 1.06E-08 | Granulocytes Bzw2        |
| 7.83E-13 | 1.03030867 | 0.256 | 0.159 | 1.11E-08 | Granulocytes Cmip        |
| 7.84E-13 | -0.7264584 | 0.006 | 0.107 | 1.11E-08 | Granulocytes Klre1       |
| 7.85E-13 | -0.3939964 | 0.008 | 0.111 | 1.11E-08 | Granulocytes R3hdm1      |
| 7.87E-13 | -0.3448744 | 0.045 | 0.174 | 1.11E-08 | Granulocytes Ccar1       |
| 8.16E-13 | -0.3664134 | 0.012 | 0.118 | 1.15E-08 | Granulocytes Cfaf20      |
| 8.29E-13 | 1.03986167 | 0.466 | 0.403 | 1.17E-08 | Granulocytes Txnip       |
| 8.37E-13 | -0.3061126 | 0.004 | 0.104 | 1.18E-08 | Granulocytes lft27       |
| 8.39E-13 | -0.3925566 | 0.047 | 0.174 | 1.19E-08 | Granulocytes Mta2        |
| 8.65E-13 | -0.4127735 | 0.02  | 0.133 | 1.22E-08 | Granulocytes Gt(ROSA)26s |
| 8.71E-13 | -0.4077345 | 0.041 | 0.165 | 1.23E-08 | Granulocytes Cnot4       |
| 8.80E-13 | -0.4724624 | 0.01  | 0.114 | 1.25E-08 | Granulocytes Cdt1        |
| 8.84E-13 | -0.3937276 | 0.008 | 0.11  | 1.25E-08 | Granulocytes Htatsf1     |
| 9.07E-13 | -0.2633427 | 0.018 | 0.131 | 1.28E-08 | Granulocytes Manbal      |
| 9.10E-13 | -0.4909712 | 0.018 | 0.127 | 1.29E-08 | Granulocytes Gm4070      |
| 9.11E-13 | -0.4512589 | 0.008 | 0.111 | 1.29E-08 | Granulocytes Asxl2       |
| 9.26E-13 | -0.2720986 | 0.045 | 0.175 | 1.31E-08 | Granulocytes Rab10os     |
| 9.44E-13 | -0.3946595 | 0.016 | 0.124 | 1.34E-08 | Granulocytes Hsd17b12    |

|          |            |       |       |          |                          |
|----------|------------|-------|-------|----------|--------------------------|
| 9.61E-13 | -0.274041  | 0.08  | 0.225 | 1.36E-08 | Granulocytes Ppp2r1a     |
| 9.63E-13 | -0.3651004 | 0.029 | 0.146 | 1.36E-08 | Granulocytes Rad23a      |
| 9.86E-13 | -0.3728191 | 0.014 | 0.121 | 1.40E-08 | Granulocytes Ube2d1      |
| 9.90E-13 | -0.3084216 | 0.014 | 0.121 | 1.40E-08 | Granulocytes Ccnh        |
| 9.90E-13 | -0.3179042 | 0.037 | 0.161 | 1.40E-08 | Granulocytes Zfr         |
| 1.01E-12 | -0.430314  | 0.014 | 0.121 | 1.43E-08 | Granulocytes Riok1       |
| 1.04E-12 | 1.11830226 | 0.299 | 0.203 | 1.47E-08 | Granulocytes Creg1       |
| 1.09E-12 | -0.3250067 | 0.006 | 0.106 | 1.54E-08 | Granulocytes Mrps18b     |
| 1.10E-12 | -0.3938295 | 0.01  | 0.113 | 1.56E-08 | Granulocytes Gbp3        |
| 1.12E-12 | -0.3964533 | 0.027 | 0.142 | 1.59E-08 | Granulocytes 2410004B18f |
| 1.20E-12 | -0.4074347 | 0.006 | 0.106 | 1.70E-08 | Granulocytes Rab19       |
| 1.20E-12 | -0.3584781 | 0.008 | 0.11  | 1.70E-08 | Granulocytes Mad2l2      |
| 1.21E-12 | -0.3958804 | 0.051 | 0.181 | 1.71E-08 | Granulocytes Cnot6l      |
| 1.21E-12 | -0.323272  | 0.049 | 0.18  | 1.71E-08 | Granulocytes Parp14      |
| 1.21E-12 | -0.3467295 | 0.008 | 0.109 | 1.71E-08 | Granulocytes 3830406C13f |
| 1.22E-12 | -0.325162  | 0.018 | 0.128 | 1.73E-08 | Granulocytes Cebpzos     |
| 1.24E-12 | -0.3914632 | 0.006 | 0.105 | 1.76E-08 | Granulocytes Bmyc        |
| 1.25E-12 | -0.3785196 | 0.006 | 0.105 | 1.77E-08 | Granulocytes Mrps5       |
| 1.26E-12 | -0.2966624 | 0.039 | 0.161 | 1.78E-08 | Granulocytes Smu1        |
| 1.27E-12 | -0.2932761 | 0.031 | 0.147 | 1.80E-08 | Granulocytes Igbp1       |
| 1.29E-12 | -0.3836743 | 0.065 | 0.202 | 1.82E-08 | Granulocytes Arhgap17    |
| 1.31E-12 | -0.2819212 | 0.153 | 0.333 | 1.86E-08 | Granulocytes Rapgef6     |
| 1.33E-12 | -0.3063604 | 0.047 | 0.175 | 1.88E-08 | Granulocytes Cbfb        |
| 1.33E-12 | -0.3415079 | 0.018 | 0.128 | 1.89E-08 | Granulocytes BC003965    |
| 1.34E-12 | -0.3620585 | 0.008 | 0.109 | 1.90E-08 | Granulocytes Polb        |
| 1.34E-12 | -0.3017307 | 0.027 | 0.142 | 1.90E-08 | Granulocytes Ptpra       |
| 1.36E-12 | -0.4091319 | 0.014 | 0.119 | 1.93E-08 | Granulocytes Rcc2        |
| 1.40E-12 | -0.3968159 | 0.008 | 0.109 | 1.98E-08 | Granulocytes Mink1       |
| 1.43E-12 | -0.3441135 | 0.006 | 0.105 | 2.02E-08 | Granulocytes Dera        |
| 1.43E-12 | -0.3935417 | 0.014 | 0.119 | 2.03E-08 | Granulocytes Fdps        |
| 1.46E-12 | 0.63093966 | 0.112 | 0.044 | 2.06E-08 | Granulocytes Cd80        |
| 1.55E-12 | 1.02691174 | 0.247 | 0.152 | 2.19E-08 | Granulocytes Ddit3       |
| 1.56E-12 | -0.3729319 | 0.029 | 0.144 | 2.21E-08 | Granulocytes Creld2      |
| 1.58E-12 | -0.2771445 | 0.029 | 0.144 | 2.23E-08 | Granulocytes Fbxo6       |
| 1.67E-12 | -0.3699743 | 0.029 | 0.143 | 2.36E-08 | Granulocytes Cd2bp2      |
| 1.70E-12 | -0.3213719 | 0.057 | 0.191 | 2.41E-08 | Granulocytes Zfp292      |
| 1.72E-12 | -0.4191677 | 0.027 | 0.14  | 2.43E-08 | Granulocytes Traf6       |
| 1.73E-12 | -0.4091199 | 0.025 | 0.137 | 2.45E-08 | Granulocytes Cabin1      |
| 1.73E-12 | -0.480626  | 0.039 | 0.16  | 2.45E-08 | Granulocytes Lamb3       |
| 1.74E-12 | -0.3540134 | 0.004 | 0.101 | 2.46E-08 | Granulocytes Noc2l       |
| 1.79E-12 | -0.2729138 | 0.057 | 0.191 | 2.54E-08 | Granulocytes 2310011J03R |
| 1.85E-12 | -0.3008112 | 0.102 | 0.257 | 2.62E-08 | Granulocytes Ikzf1       |
| 1.86E-12 | -0.2749573 | 0.041 | 0.165 | 2.63E-08 | Granulocytes Surf1       |
| 1.86E-12 | -0.3065042 | 0.037 | 0.158 | 2.64E-08 | Granulocytes Cpsf6       |
| 1.86E-12 | -0.3228293 | 0.004 | 0.101 | 2.64E-08 | Granulocytes Rnaseh2a    |
| 1.92E-12 | -0.4428364 | 0.01  | 0.112 | 2.72E-08 | Granulocytes Plcx2       |
| 1.93E-12 | 1.45681141 | 0.442 | 0.373 | 2.73E-08 | Granulocytes Gadd45b     |
| 2.03E-12 | 1.137896   | 0.266 | 0.171 | 2.87E-08 | Granulocytes Cdkn2d      |

|          |            |       |       |          |                      |
|----------|------------|-------|-------|----------|----------------------|
| 2.04E-12 | -0.3222312 | 0.012 | 0.116 | 2.89E-08 | Granulocytes Rrp7a   |
| 2.05E-12 | -0.299265  | 0.029 | 0.143 | 2.90E-08 | Granulocytes Pdha1   |
| 2.13E-12 | -0.3366715 | 0.012 | 0.115 | 3.01E-08 | Granulocytes Vkorc1  |
| 2.17E-12 | -0.342196  | 0.004 | 0.1   | 3.08E-08 | Granulocytes Alad    |
| 2.18E-12 | 1.22823156 | 0.425 | 0.347 | 3.09E-08 | Granulocytes Fosb    |
| 2.22E-12 | -0.2896643 | 0.006 | 0.104 | 3.15E-08 | Granulocytes Hat1    |
| 2.26E-12 | -0.2859073 | 0.051 | 0.18  | 3.20E-08 | Granulocytes Golga7  |
| 2.27E-12 | -0.2795115 | 0.027 | 0.14  | 3.21E-08 | Granulocytes Nrpf2   |
| 2.32E-12 | -0.4163444 | 0.02  | 0.129 | 3.29E-08 | Granulocytes Nsf     |
| 2.34E-12 | 0.88772382 | 0.247 | 0.152 | 3.31E-08 | Granulocytes Mbp     |
| 2.34E-12 | -0.3650825 | 0.004 | 0.1   | 3.32E-08 | Granulocytes Rsrc1   |
| 2.37E-12 | -0.2595502 | 0.074 | 0.213 | 3.36E-08 | Granulocytes Vps36   |
| 2.48E-12 | -0.3204162 | 0.029 | 0.143 | 3.51E-08 | Granulocytes Paf1    |
| 2.48E-12 | 0.90561592 | 0.174 | 0.089 | 3.52E-08 | Granulocytes Por     |
| 2.51E-12 | -0.2584991 | 0.137 | 0.311 | 3.55E-08 | Granulocytes Ubxn4   |
| 2.54E-12 | -0.364746  | 0.01  | 0.111 | 3.60E-08 | Granulocytes Nop14   |
| 2.56E-12 | 1.18884082 | 0.317 | 0.23  | 3.63E-08 | Granulocytes Etf1    |
| 2.58E-12 | -0.3239802 | 0.016 | 0.122 | 3.65E-08 | Granulocytes Pes1    |
| 2.59E-12 | -0.3225644 | 0.031 | 0.146 | 3.66E-08 | Granulocytes Ccz1    |
| 2.59E-12 | -0.3702838 | 0.016 | 0.122 | 3.66E-08 | Granulocytes Dram2   |
| 2.64E-12 | -0.3167433 | 0.027 | 0.139 | 3.73E-08 | Granulocytes Cyb5r3  |
| 2.68E-12 | -0.3230594 | 0.02  | 0.129 | 3.80E-08 | Granulocytes Lactb   |
| 2.69E-12 | -0.3382019 | 0.012 | 0.114 | 3.81E-08 | Granulocytes Snx12   |
| 2.69E-12 | -0.3151815 | 0.01  | 0.11  | 3.81E-08 | Granulocytes Naa20   |
| 2.71E-12 | 1.01871071 | 0.117 | 0.048 | 3.84E-08 | Granulocytes Clec4n  |
| 2.74E-12 | -0.2907139 | 0.047 | 0.173 | 3.89E-08 | Granulocytes Cdc40   |
| 2.76E-12 | -0.293668  | 0.033 | 0.148 | 3.90E-08 | Granulocytes Zfp207  |
| 2.78E-12 | -0.387266  | 0.012 | 0.114 | 3.94E-08 | Granulocytes Fgd2    |
| 2.80E-12 | 0.81289894 | 0.137 | 0.061 | 3.96E-08 | Granulocytes Hdac4   |
| 2.82E-12 | -0.5409566 | 0.008 | 0.106 | 3.99E-08 | Granulocytes Slamf9  |
| 2.83E-12 | -0.3929268 | 0.006 | 0.102 | 4.00E-08 | Granulocytes Nob1    |
| 2.90E-12 | -0.3414349 | 0.029 | 0.143 | 4.10E-08 | Granulocytes Arhgef6 |
| 2.91E-12 | -0.3761058 | 0.018 | 0.125 | 4.13E-08 | Granulocytes Naaa    |
| 2.97E-12 | -0.3698976 | 0.008 | 0.107 | 4.20E-08 | Granulocytes Aldh9a1 |
| 2.98E-12 | -0.2993701 | 0.018 | 0.125 | 4.21E-08 | Granulocytes Larp1   |
| 3.01E-12 | -0.2598714 | 0.041 | 0.164 | 4.26E-08 | Granulocytes Ubtf    |
| 3.08E-12 | -0.2714264 | 0.143 | 0.317 | 4.36E-08 | Granulocytes Ifi27   |
| 3.26E-12 | -0.4656187 | 0.012 | 0.113 | 4.61E-08 | Granulocytes Arsb    |
| 3.29E-12 | 0.99835523 | 0.217 | 0.125 | 4.66E-08 | Granulocytes Atg2a   |
| 3.32E-12 | -0.3696056 | 0.006 | 0.102 | 4.69E-08 | Granulocytes Galnt2  |
| 3.34E-12 | 0.85632159 | 0.143 | 0.066 | 4.74E-08 | Granulocytes Hgsnat  |
| 3.45E-12 | -0.3553942 | 0.014 | 0.117 | 4.88E-08 | Granulocytes Ehmt2   |
| 3.45E-12 | -0.7779446 | 0.012 | 0.113 | 4.88E-08 | Granulocytes Tsc22d1 |
| 3.45E-12 | -0.2720239 | 0.018 | 0.125 | 4.88E-08 | Granulocytes Cmas    |
| 3.61E-12 | -0.286601  | 0.055 | 0.184 | 5.10E-08 | Granulocytes Dgkz    |
| 3.65E-12 | -0.2699867 | 0.053 | 0.182 | 5.17E-08 | Granulocytes Elf2    |
| 3.69E-12 | -0.2880499 | 0.057 | 0.187 | 5.22E-08 | Granulocytes Ddx46   |
| 3.76E-12 | -0.3176027 | 0.008 | 0.106 | 5.32E-08 | Granulocytes Tfg     |



|          |            |       |       |          |                          |
|----------|------------|-------|-------|----------|--------------------------|
| 3.76E-12 | -0.3413024 | 0.039 | 0.156 | 5.33E-08 | Granulocytes Rfc1        |
| 3.77E-12 | -0.3238457 | 0.016 | 0.121 | 5.34E-08 | Granulocytes Dars        |
| 3.81E-12 | -0.3023181 | 0.006 | 0.102 | 5.39E-08 | Granulocytes Prdx4       |
| 3.83E-12 | -0.3692856 | 0.008 | 0.105 | 5.41E-08 | Granulocytes Panx1       |
| 3.83E-12 | -0.26635   | 0.008 | 0.107 | 5.43E-08 | Granulocytes Hes6        |
| 3.86E-12 | -0.2852534 | 0.106 | 0.262 | 5.46E-08 | Granulocytes Tpst2       |
| 3.90E-12 | -0.41112   | 0.01  | 0.109 | 5.53E-08 | Granulocytes Tfam        |
| 3.91E-12 | -0.2750614 | 0.063 | 0.198 | 5.53E-08 | Granulocytes Pcpn        |
| 3.96E-12 | -0.2968078 | 0.016 | 0.121 | 5.61E-08 | Granulocytes Ppil3       |
| 4.00E-12 | -0.3332835 | 0.008 | 0.106 | 5.66E-08 | Granulocytes Phpt1       |
| 4.00E-12 | -0.29244   | 0.006 | 0.102 | 5.66E-08 | Granulocytes Galk1       |
| 4.08E-12 | -0.2734031 | 0.043 | 0.163 | 5.77E-08 | Granulocytes Derl2       |
| 4.08E-12 | -0.3627428 | 0.018 | 0.123 | 5.78E-08 | Granulocytes Eif4e3      |
| 4.14E-12 | -0.3161278 | 0.006 | 0.102 | 5.86E-08 | Granulocytes Tsr3        |
| 4.36E-12 | -0.3816691 | 0.02  | 0.127 | 6.17E-08 | Granulocytes Ccnt2       |
| 4.45E-12 | -0.6229194 | 0.012 | 0.112 | 6.30E-08 | Granulocytes Pltp        |
| 4.47E-12 | -0.3338181 | 0.012 | 0.113 | 6.33E-08 | Granulocytes Ppp5c       |
| 4.48E-12 | -0.2899222 | 0.047 | 0.17  | 6.35E-08 | Granulocytes Nras        |
| 4.49E-12 | -0.428293  | 0.008 | 0.105 | 6.36E-08 | Granulocytes Srek1       |
| 4.52E-12 | -0.2785932 | 0.022 | 0.131 | 6.40E-08 | Granulocytes 4930453N24I |
| 4.61E-12 | -0.3304524 | 0.008 | 0.105 | 6.53E-08 | Granulocytes Hmgn5       |
| 4.62E-12 | 0.82083542 | 0.16  | 0.078 | 6.54E-08 | Granulocytes Dennd5a     |
| 4.69E-12 | -0.3097329 | 0.008 | 0.106 | 6.64E-08 | Granulocytes Tmem60      |
| 4.70E-12 | -0.358406  | 0.02  | 0.126 | 6.66E-08 | Granulocytes U2af1l4     |
| 4.72E-12 | -0.2990479 | 0.039 | 0.157 | 6.68E-08 | Granulocytes Tmem222     |
| 4.77E-12 | -0.2522217 | 0.018 | 0.125 | 6.75E-08 | Granulocytes Ccny        |
| 4.87E-12 | -0.3086277 | 0.037 | 0.154 | 6.89E-08 | Granulocytes Kin         |
| 4.88E-12 | -0.3469626 | 0.018 | 0.122 | 6.90E-08 | Granulocytes Echs1       |
| 4.98E-12 | -0.3537391 | 0.025 | 0.132 | 7.05E-08 | Granulocytes Prpsap1     |
| 5.08E-12 | -0.308138  | 0.02  | 0.127 | 7.20E-08 | Granulocytes 4921524J17R |
| 5.11E-12 | -0.5979746 | 0.008 | 0.103 | 7.24E-08 | Granulocytes Snn         |
| 5.12E-12 | -0.2841178 | 0.037 | 0.154 | 7.25E-08 | Granulocytes lah1        |
| 5.16E-12 | -0.2549795 | 0.045 | 0.167 | 7.31E-08 | Granulocytes Tmem248     |
| 5.38E-12 | -0.2907874 | 0.027 | 0.137 | 7.61E-08 | Granulocytes Med11       |
| 5.41E-12 | -0.3488032 | 0.01  | 0.108 | 7.65E-08 | Granulocytes Rpa3        |
| 5.41E-12 | -0.3561351 | 0.02  | 0.127 | 7.66E-08 | Granulocytes Rasa1       |
| 5.42E-12 | -0.3798079 | 0.008 | 0.104 | 7.67E-08 | Granulocytes Zpr1        |
| 5.45E-12 | -0.3195119 | 0.01  | 0.109 | 7.71E-08 | Granulocytes Slc25a17    |
| 5.66E-12 | -0.2996603 | 0.049 | 0.175 | 8.01E-08 | Granulocytes Mia3        |
| 5.67E-12 | -0.3978758 | 0.006 | 0.101 | 8.02E-08 | Granulocytes A630001G21  |
| 5.67E-12 | -0.2834936 | 0.029 | 0.141 | 8.03E-08 | Granulocytes Ap2b1       |
| 5.75E-12 | -0.4061366 | 0.006 | 0.101 | 8.14E-08 | Granulocytes Syt11       |
| 5.75E-12 | -0.3680384 | 0.008 | 0.105 | 8.15E-08 | Granulocytes Atp2a2      |
| 5.88E-12 | -0.4258646 | 0.01  | 0.107 | 8.32E-08 | Granulocytes Cish        |
| 5.98E-12 | -0.2887176 | 0.016 | 0.119 | 8.46E-08 | Granulocytes Pdzd11      |
| 6.03E-12 | -0.3905277 | 0.01  | 0.107 | 8.54E-08 | Granulocytes Cul5        |
| 6.04E-12 | -0.2843987 | 0.029 | 0.141 | 8.55E-08 | Granulocytes Bloc1s4     |
| 6.08E-12 | -0.3389469 | 0.025 | 0.133 | 8.61E-08 | Granulocytes Atp6v0a2    |

|          |            |       |       |          |                         |
|----------|------------|-------|-------|----------|-------------------------|
| 6.11E-12 | -0.3028356 | 0.018 | 0.123 | 8.66E-08 | Granulocytes Nup50      |
| 6.12E-12 | -0.2868264 | 0.027 | 0.136 | 8.66E-08 | Granulocytes Mapkapk3   |
| 6.16E-12 | -0.3152233 | 0.01  | 0.107 | 8.71E-08 | Granulocytes Mrps11     |
| 6.18E-12 | -0.2581059 | 0.037 | 0.153 | 8.74E-08 | Granulocytes Txnl4a     |
| 6.18E-12 | -0.2636838 | 0.041 | 0.161 | 8.75E-08 | Granulocytes Ssr1       |
| 6.24E-12 | -0.3968617 | 0.022 | 0.128 | 8.83E-08 | Granulocytes Ahsa2      |
| 6.38E-12 | -0.2700752 | 0.364 | 0.6   | 9.03E-08 | Granulocytes Pcbp2      |
| 7.02E-12 | -0.367579  | 0.012 | 0.111 | 9.94E-08 | Granulocytes Nol12      |
| 7.05E-12 | -0.3451444 | 0.012 | 0.111 | 9.98E-08 | Granulocytes Eif2a      |
| 7.07E-12 | -0.3545555 | 0.033 | 0.143 | 1.00E-07 | Granulocytes Tomm70a    |
| 7.11E-12 | -0.2989266 | 0.043 | 0.163 | 1.01E-07 | Granulocytes Ddx42      |
| 7.22E-12 | -0.3413882 | 0.01  | 0.107 | 1.02E-07 | Granulocytes Mthfd2     |
| 7.32E-12 | -0.3438207 | 0.008 | 0.103 | 1.04E-07 | Granulocytes Nt5c3b     |
| 7.43E-12 | 1.03305454 | 0.207 | 0.118 | 1.05E-07 | Granulocytes Carhsp1    |
| 7.50E-12 | -0.3666638 | 0.043 | 0.161 | 1.06E-07 | Granulocytes Ubr2       |
| 7.57E-12 | -0.2963234 | 0.022 | 0.13  | 1.07E-07 | Granulocytes Cdkn2aipnl |
| 7.58E-12 | -0.4109906 | 0.045 | 0.164 | 1.07E-07 | Granulocytes Atp2a3     |
| 7.63E-12 | -0.3425405 | 0.01  | 0.106 | 1.08E-07 | Granulocytes Sf3a1      |
| 7.77E-12 | -0.281951  | 0.035 | 0.15  | 1.10E-07 | Granulocytes Egln2      |
| 7.88E-12 | -0.3242364 | 0.029 | 0.138 | 1.12E-07 | Granulocytes Rbmxl1     |
| 7.94E-12 | -0.305827  | 0.012 | 0.111 | 1.12E-07 | Granulocytes Eva1b      |
| 8.02E-12 | -0.285843  | 0.006 | 0.1   | 1.14E-07 | Granulocytes Bcat2      |
| 8.05E-12 | -0.3309632 | 0.027 | 0.135 | 1.14E-07 | Granulocytes Hmg20b     |
| 8.22E-12 | -0.3239919 | 0.025 | 0.131 | 1.16E-07 | Granulocytes Anxa7      |
| 8.28E-12 | -0.5591881 | 0.018 | 0.121 | 1.17E-07 | Granulocytes Fchsd2     |
| 8.84E-12 | -0.3202763 | 0.041 | 0.156 | 1.25E-07 | Granulocytes Azi2       |
| 8.84E-12 | -0.3689862 | 0.008 | 0.103 | 1.25E-07 | Granulocytes Mcm4       |
| 8.85E-12 | -0.3071872 | 0.016 | 0.118 | 1.25E-07 | Granulocytes Tubb6      |
| 8.91E-12 | -0.2552894 | 0.02  | 0.125 | 1.26E-07 | Granulocytes Mtfr1l     |
| 8.93E-12 | 1.22657486 | 0.327 | 0.238 | 1.26E-07 | Granulocytes Tiparp     |
| 8.97E-12 | -0.2783292 | 0.053 | 0.177 | 1.27E-07 | Granulocytes Rps6ka1    |
| 9.10E-12 | -0.3324228 | 0.008 | 0.102 | 1.29E-07 | Granulocytes Lxn        |
| 9.30E-12 | -0.2987395 | 0.055 | 0.18  | 1.32E-07 | Granulocytes Pdhb       |
| 9.52E-12 | -0.3218514 | 0.031 | 0.142 | 1.35E-07 | Granulocytes Traf3ip3   |
| 9.59E-12 | 0.59069003 | 0.681 | 0.717 | 1.36E-07 | Granulocytes Cdc42      |
| 9.66E-12 | -0.2813566 | 0.055 | 0.181 | 1.37E-07 | Granulocytes Pkn2       |
| 9.67E-12 | -0.2822012 | 0.039 | 0.156 | 1.37E-07 | Granulocytes Hspa14     |
| 9.83E-12 | -0.3113733 | 0.008 | 0.103 | 1.39E-07 | Granulocytes Erap1      |
| 1.03E-11 | -0.3582088 | 0.016 | 0.117 | 1.45E-07 | Granulocytes Snd1       |
| 1.04E-11 | -0.2772814 | 0.02  | 0.124 | 1.47E-07 | Granulocytes Zfp330     |
| 1.04E-11 | -0.3370245 | 0.01  | 0.106 | 1.47E-07 | Granulocytes Exosc7     |
| 1.08E-11 | -0.3260351 | 0.01  | 0.106 | 1.53E-07 | Granulocytes Pycr2      |
| 1.10E-11 | -0.2901826 | 0.049 | 0.173 | 1.56E-07 | Granulocytes Aplp2      |
| 1.11E-11 | -0.4235536 | 0.012 | 0.109 | 1.57E-07 | Granulocytes Slc4a7     |
| 1.12E-11 | -0.305198  | 0.031 | 0.141 | 1.59E-07 | Granulocytes Mrpl48     |
| 1.13E-11 | -0.2963226 | 0.022 | 0.126 | 1.60E-07 | Granulocytes Copg1      |
| 1.13E-11 | -0.3564995 | 0.008 | 0.102 | 1.61E-07 | Granulocytes Ncoa7      |
| 1.14E-11 | -0.4503809 | 0.125 | 0.273 | 1.61E-07 | Granulocytes Rgcc       |

|          |            |       |       |          |                          |
|----------|------------|-------|-------|----------|--------------------------|
| 1.14E-11 | -0.3351109 | 0.356 | 0.584 | 1.62E-07 | Granulocytes Zfp36l2     |
| 1.15E-11 | -0.2863069 | 0.037 | 0.151 | 1.63E-07 | Granulocytes Vps72       |
| 1.18E-11 | -0.2965553 | 0.031 | 0.14  | 1.67E-07 | Granulocytes Mapk1ip1l   |
| 1.23E-11 | -0.3537261 | 0.029 | 0.136 | 1.74E-07 | Granulocytes Zranb2      |
| 1.24E-11 | -0.4306563 | 0.008 | 0.102 | 1.76E-07 | Granulocytes Itm2a       |
| 1.28E-11 | -0.3188446 | 0.098 | 0.244 | 1.82E-07 | Granulocytes 9-Sep       |
| 1.31E-11 | -0.2789557 | 0.027 | 0.135 | 1.85E-07 | Granulocytes Stk19       |
| 1.31E-11 | 1.04100676 | 0.417 | 0.344 | 1.86E-07 | Granulocytes Efhd2       |
| 1.34E-11 | -0.377976  | 0.031 | 0.14  | 1.90E-07 | Granulocytes Map3k1      |
| 1.36E-11 | -0.3771698 | 0.008 | 0.102 | 1.92E-07 | Granulocytes Gm6377      |
| 1.39E-11 | -0.344371  | 0.018 | 0.119 | 1.96E-07 | Granulocytes Zfp511      |
| 1.43E-11 | -0.3167371 | 0.012 | 0.109 | 2.02E-07 | Granulocytes Ap1b1       |
| 1.43E-11 | -0.2725639 | 0.037 | 0.151 | 2.03E-07 | Granulocytes Ubn2        |
| 1.48E-11 | -0.3893915 | 0.014 | 0.112 | 2.10E-07 | Granulocytes Tia1        |
| 1.50E-11 | -0.2689167 | 0.02  | 0.123 | 2.13E-07 | Granulocytes 9130401M01  |
| 1.51E-11 | -0.251593  | 0.053 | 0.176 | 2.14E-07 | Granulocytes Ppp6c       |
| 1.51E-11 | -0.34826   | 0.025 | 0.129 | 2.14E-07 | Granulocytes 1700017B05I |
| 1.57E-11 | -0.3176351 | 0.012 | 0.108 | 2.22E-07 | Granulocytes Eci2        |
| 1.57E-11 | 0.87699174 | 0.149 | 0.073 | 2.22E-07 | Granulocytes Fas         |
| 1.57E-11 | -0.2774196 | 0.025 | 0.131 | 2.23E-07 | Granulocytes Man1a2      |
| 1.62E-11 | -0.3431295 | 0.012 | 0.108 | 2.29E-07 | Granulocytes Exosc10     |
| 1.68E-11 | -0.3272471 | 0.01  | 0.104 | 2.38E-07 | Granulocytes Tpm1        |
| 1.75E-11 | -0.3121061 | 0.014 | 0.111 | 2.48E-07 | Granulocytes Polr3k      |
| 1.76E-11 | 0.80482577 | 0.104 | 0.042 | 2.49E-07 | Granulocytes Sesn2       |
| 1.78E-11 | -0.3328137 | 0.025 | 0.129 | 2.52E-07 | Granulocytes Jmjd6       |
| 1.80E-11 | -0.3446367 | 0.027 | 0.132 | 2.55E-07 | Granulocytes Lrrc58      |
| 1.81E-11 | -0.3263696 | 0.033 | 0.143 | 2.56E-07 | Granulocytes Avl9        |
| 1.81E-11 | -0.2793212 | 0.569 | 0.772 | 2.56E-07 | Granulocytes Atp5e       |
| 1.82E-11 | -0.2835945 | 0.051 | 0.173 | 2.57E-07 | Granulocytes Ndfip2      |
| 1.85E-11 | -0.3768171 | 0.55  | 0.733 | 2.61E-07 | Granulocytes Clic1       |
| 1.90E-11 | -0.3336062 | 0.022 | 0.125 | 2.70E-07 | Granulocytes Tmub1       |
| 1.94E-11 | -0.3580128 | 0.014 | 0.111 | 2.75E-07 | Granulocytes Topbp1      |
| 1.95E-11 | -0.3560963 | 0.031 | 0.14  | 2.77E-07 | Granulocytes Zcchc7      |
| 1.96E-11 | -0.4059514 | 0.01  | 0.103 | 2.77E-07 | Granulocytes Ctso        |
| 1.96E-11 | -0.300296  | 0.074 | 0.206 | 2.77E-07 | Granulocytes Grk6        |
| 1.97E-11 | -0.3490369 | 0.008 | 0.1   | 2.78E-07 | Granulocytes Mfng        |
| 2.01E-11 | -0.4281059 | 0.112 | 0.257 | 2.84E-07 | Granulocytes Tcp11l2     |
| 2.10E-11 | -0.3496179 | 0.012 | 0.107 | 2.97E-07 | Granulocytes Ncbp1       |
| 2.13E-11 | -0.3224524 | 0.012 | 0.107 | 3.02E-07 | Granulocytes Pfdn4       |
| 2.15E-11 | -0.34141   | 0.008 | 0.1   | 3.04E-07 | Granulocytes Dpysl2      |
| 2.16E-11 | -0.3230053 | 0.049 | 0.167 | 3.06E-07 | Granulocytes Snx1        |
| 2.16E-11 | -0.3198163 | 0.029 | 0.134 | 3.06E-07 | Granulocytes Ggh         |
| 2.19E-11 | -0.4477414 | 0.098 | 0.237 | 3.09E-07 | Granulocytes Stap1       |
| 2.21E-11 | -0.3375201 | 0.027 | 0.131 | 3.13E-07 | Granulocytes Ube2l6      |
| 2.23E-11 | -0.2800717 | 0.039 | 0.151 | 3.16E-07 | Granulocytes Gtpbp2      |
| 2.26E-11 | -0.390633  | 0.016 | 0.115 | 3.20E-07 | Granulocytes Casp8ap2    |
| 2.27E-11 | -0.3404317 | 0.018 | 0.118 | 3.21E-07 | Granulocytes Ube2g2      |
| 2.35E-11 | -0.2946064 | 0.008 | 0.1   | 3.32E-07 | Granulocytes Mocs2       |

|          |            |       |       |          |                          |
|----------|------------|-------|-------|----------|--------------------------|
| 2.38E-11 | -0.6242297 | 0.01  | 0.103 | 3.37E-07 | Granulocytes Lef1        |
| 2.38E-11 | 0.80213679 | 0.135 | 0.063 | 3.37E-07 | Granulocytes Usp32       |
| 2.42E-11 | -0.3343389 | 0.01  | 0.103 | 3.43E-07 | Granulocytes Parp2       |
| 2.44E-11 | -0.3255547 | 0.037 | 0.149 | 3.45E-07 | Granulocytes Zc3h13      |
| 2.45E-11 | -0.2816054 | 0.029 | 0.136 | 3.47E-07 | Granulocytes Rexo1       |
| 2.45E-11 | -0.3606131 | 0.014 | 0.11  | 3.47E-07 | Granulocytes Hdac2       |
| 2.46E-11 | -0.4338806 | 0.016 | 0.113 | 3.48E-07 | Granulocytes Gfpt1       |
| 2.46E-11 | -0.3317313 | 0.022 | 0.125 | 3.49E-07 | Granulocytes Cpsf2       |
| 2.51E-11 | -0.3238643 | 0.012 | 0.106 | 3.55E-07 | Granulocytes Urm1        |
| 2.52E-11 | -0.3801383 | 0.043 | 0.156 | 3.57E-07 | Granulocytes Arcn1       |
| 2.57E-11 | -0.3260157 | 0.022 | 0.124 | 3.64E-07 | Granulocytes Trmt6       |
| 2.65E-11 | -0.8595826 | 0.016 | 0.113 | 3.74E-07 | Granulocytes Ccl2        |
| 2.65E-11 | -0.341962  | 0.014 | 0.11  | 3.75E-07 | Granulocytes Dnase2a     |
| 2.77E-11 | -0.4038972 | 0.027 | 0.13  | 3.92E-07 | Granulocytes Pcm1        |
| 2.78E-11 | -0.3468972 | 0.014 | 0.108 | 3.94E-07 | Granulocytes Polr1c      |
| 2.80E-11 | -0.2998896 | 0.016 | 0.113 | 3.97E-07 | Granulocytes Gfer        |
| 2.89E-11 | -0.3338532 | 0.022 | 0.124 | 4.09E-07 | Granulocytes Vps13a      |
| 2.93E-11 | -0.2581032 | 0.014 | 0.111 | 4.15E-07 | Granulocytes Dnpep       |
| 3.00E-11 | -0.3203628 | 0.02  | 0.121 | 4.24E-07 | Granulocytes 2610507B11f |
| 3.01E-11 | -0.3272927 | 0.025 | 0.127 | 4.26E-07 | Granulocytes Wdr82       |
| 3.05E-11 | -0.350539  | 0.059 | 0.182 | 4.32E-07 | Granulocytes Ranbp2      |
| 3.13E-11 | -0.3239412 | 0.01  | 0.102 | 4.44E-07 | Granulocytes Sgf29       |
| 3.15E-11 | -0.3663188 | 0.047 | 0.162 | 4.45E-07 | Granulocytes Tcirg1      |
| 3.17E-11 | -0.2602394 | 0.012 | 0.106 | 4.48E-07 | Granulocytes Tmem109     |
| 3.33E-11 | -0.2581407 | 0.106 | 0.252 | 4.72E-07 | Granulocytes Batf        |
| 3.41E-11 | -0.347944  | 0.045 | 0.16  | 4.83E-07 | Granulocytes Casp3       |
| 3.47E-11 | -0.251957  | 0.055 | 0.176 | 4.91E-07 | Granulocytes Aph1a       |
| 3.56E-11 | 0.93069146 | 0.436 | 0.379 | 5.03E-07 | Granulocytes Cdc42se1    |
| 3.67E-11 | -0.3564935 | 0.01  | 0.102 | 5.19E-07 | Granulocytes Dbf4        |
| 3.70E-11 | -0.3458752 | 0.045 | 0.16  | 5.23E-07 | Granulocytes Tmem243     |
| 3.79E-11 | -0.2895102 | 0.029 | 0.134 | 5.36E-07 | Granulocytes Dap3        |
| 3.79E-11 | -0.3142316 | 0.012 | 0.105 | 5.36E-07 | Granulocytes Exosc1      |
| 3.81E-11 | -0.3283928 | 0.014 | 0.109 | 5.40E-07 | Granulocytes Smarcc1     |
| 3.83E-11 | -0.2902399 | 0.014 | 0.109 | 5.43E-07 | Granulocytes 2610001J05R |
| 3.87E-11 | -0.2624283 | 0.022 | 0.123 | 5.49E-07 | Granulocytes Tpp1        |
| 3.92E-11 | -0.4533328 | 0.037 | 0.144 | 5.56E-07 | Granulocytes Rnase6      |
| 4.01E-11 | -0.2982081 | 0.016 | 0.112 | 5.68E-07 | Granulocytes Tbl1x       |
| 4.08E-11 | 1.04160997 | 0.233 | 0.148 | 5.77E-07 | Granulocytes Preb        |
| 4.11E-11 | 0.8752185  | 0.112 | 0.048 | 5.81E-07 | Granulocytes Jdp2        |
| 4.12E-11 | -0.2926645 | 0.018 | 0.116 | 5.83E-07 | Granulocytes Crbn        |
| 4.14E-11 | -0.3671131 | 0.016 | 0.111 | 5.86E-07 | Granulocytes Scimp       |
| 4.24E-11 | -0.2804501 | 0.016 | 0.113 | 6.00E-07 | Granulocytes 2300009A05f |
| 4.25E-11 | -0.4850542 | 0.027 | 0.127 | 6.02E-07 | Granulocytes Clec4a1     |
| 4.32E-11 | -0.2952513 | 0.035 | 0.143 | 6.11E-07 | Granulocytes Lypla1      |
| 4.32E-11 | -0.3560659 | 0.02  | 0.119 | 6.11E-07 | Granulocytes Rab3gap1    |
| 4.35E-11 | -0.255005  | 0.014 | 0.109 | 6.16E-07 | Granulocytes Rps19bp1    |
| 4.38E-11 | -0.3540613 | 0.016 | 0.112 | 6.20E-07 | Granulocytes Impa1       |
| 4.40E-11 | -0.4792172 | 0.022 | 0.122 | 6.22E-07 | Granulocytes Hist1h1e    |

|          |            |       |       |          |                       |
|----------|------------|-------|-------|----------|-----------------------|
| 4.73E-11 | -0.3016093 | 0.01  | 0.101 | 6.69E-07 | Granulocytes Cyb561d2 |
| 4.75E-11 | -0.3467459 | 0.016 | 0.111 | 6.72E-07 | Granulocytes Pex16    |
| 4.89E-11 | -0.3326688 | 0.014 | 0.108 | 6.92E-07 | Granulocytes ZnrF2    |
| 5.01E-11 | -0.3001867 | 0.029 | 0.133 | 7.09E-07 | Granulocytes Cul1     |
| 5.10E-11 | -0.3641994 | 0.012 | 0.104 | 7.22E-07 | Granulocytes Cd180    |
| 5.15E-11 | 0.94849248 | 0.192 | 0.109 | 7.28E-07 | Granulocytes Fes      |
| 5.53E-11 | -0.3355931 | 0.014 | 0.107 | 7.83E-07 | Granulocytes Srp54b   |
| 5.54E-11 | -0.3123323 | 0.01  | 0.1   | 7.84E-07 | Granulocytes Mrpl37   |
| 5.61E-11 | -0.3921928 | 0.035 | 0.14  | 7.95E-07 | Granulocytes Jarid2   |
| 5.66E-11 | -0.3285583 | 0.025 | 0.126 | 8.02E-07 | Granulocytes Fam114a2 |
| 5.85E-11 | -0.3192872 | 0.01  | 0.1   | 8.29E-07 | Granulocytes Anxa4    |
| 5.86E-11 | -0.3472397 | 0.018 | 0.114 | 8.30E-07 | Granulocytes Smg6     |
| 6.02E-11 | -0.3287481 | 0.022 | 0.121 | 8.52E-07 | Granulocytes Secisbp2 |
| 6.03E-11 | -0.2570057 | 0.057 | 0.177 | 8.53E-07 | Granulocytes Nab1     |
| 6.31E-11 | -0.3386625 | 0.018 | 0.113 | 8.93E-07 | Granulocytes Nelfe    |
| 6.31E-11 | -0.281287  | 0.104 | 0.249 | 8.93E-07 | Granulocytes Prrc2a   |
| 6.41E-11 | -0.3085042 | 0.106 | 0.249 | 9.08E-07 | Granulocytes Add3     |
| 6.49E-11 | -0.3249937 | 0.018 | 0.115 | 9.19E-07 | Granulocytes Pds5a    |
| 6.98E-11 | -0.308807  | 0.029 | 0.13  | 9.89E-07 | Granulocytes Rpf1     |
| 7.18E-11 | -0.320948  | 0.202 | 0.375 | 1.02E-06 | Granulocytes Bcl2a1b  |
| 7.26E-11 | -0.3253267 | 0.016 | 0.109 | 1.03E-06 | Granulocytes Ccdc86   |
| 7.42E-11 | -0.2564707 | 0.041 | 0.151 | 1.05E-06 | Granulocytes Arl2bp   |
| 7.52E-11 | -0.2652801 | 0.067 | 0.193 | 1.06E-06 | Granulocytes Add1     |
| 7.58E-11 | -0.3353011 | 0.037 | 0.146 | 1.07E-06 | Granulocytes Swap70   |
| 8.06E-11 | -0.2813545 | 0.039 | 0.148 | 1.14E-06 | Granulocytes Casp1    |
| 8.29E-11 | -0.3516729 | 0.016 | 0.109 | 1.17E-06 | Granulocytes Mtf2     |
| 8.42E-11 | -0.459487  | 0.012 | 0.101 | 1.19E-06 | Granulocytes Smc2     |
| 8.47E-11 | -0.2931248 | 0.02  | 0.117 | 1.20E-06 | Granulocytes Cers5    |
| 8.70E-11 | -0.26769   | 0.037 | 0.144 | 1.23E-06 | Granulocytes Clp1     |
| 9.09E-11 | -0.3220559 | 0.02  | 0.117 | 1.29E-06 | Granulocytes Gle1     |
| 9.18E-11 | -0.3232674 | 0.018 | 0.112 | 1.30E-06 | Granulocytes Fbxl6    |
| 9.24E-11 | -0.3538148 | 0.012 | 0.101 | 1.31E-06 | Granulocytes Exoc4    |
| 9.49E-11 | -0.3231002 | 0.016 | 0.11  | 1.34E-06 | Granulocytes Ahctf1   |
| 9.72E-11 | -0.2778266 | 0.045 | 0.157 | 1.38E-06 | Granulocytes Sash3    |
| 1.00E-10 | -0.2854594 | 0.07  | 0.195 | 1.42E-06 | Granulocytes Csnk1d   |
| 1.04E-10 | -0.2626499 | 0.025 | 0.124 | 1.48E-06 | Granulocytes Txndc11  |
| 1.04E-10 | -0.2896374 | 0.031 | 0.133 | 1.48E-06 | Granulocytes Prcp     |
| 1.06E-10 | -0.2796095 | 0.043 | 0.153 | 1.49E-06 | Granulocytes Tial1    |
| 1.12E-10 | 0.65673993 | 0.104 | 0.043 | 1.58E-06 | Granulocytes Slc35a5  |
| 1.12E-10 | -0.3129359 | 0.027 | 0.126 | 1.59E-06 | Granulocytes Topors   |
| 1.14E-10 | -0.3199349 | 0.02  | 0.115 | 1.61E-06 | Granulocytes Rae1     |
| 1.15E-10 | -0.2722615 | 0.045 | 0.154 | 1.63E-06 | Granulocytes Rbbp6    |
| 1.16E-10 | -0.4943929 | 0.012 | 0.1   | 1.64E-06 | Granulocytes Tmem176a |
| 1.16E-10 | -0.289543  | 0.012 | 0.102 | 1.65E-06 | Granulocytes Fam207a  |
| 1.20E-10 | -0.266829  | 0.035 | 0.14  | 1.70E-06 | Granulocytes Fam102a  |
| 1.20E-10 | -0.2756838 | 0.031 | 0.132 | 1.70E-06 | Granulocytes Tank     |
| 1.25E-10 | -0.3260298 | 0.012 | 0.101 | 1.77E-06 | Granulocytes Vps41    |
| 1.26E-10 | -0.2844938 | 0.016 | 0.108 | 1.79E-06 | Granulocytes Ppm1b    |

|          |            |       |       |          |                       |
|----------|------------|-------|-------|----------|-----------------------|
| 1.27E-10 | -0.3581058 | 0.033 | 0.136 | 1.80E-06 | Granulocytes Ipo7     |
| 1.27E-10 | -0.3212362 | 0.027 | 0.126 | 1.80E-06 | Granulocytes Dcaf8    |
| 1.29E-10 | -0.3164038 | 0.029 | 0.128 | 1.82E-06 | Granulocytes Ptprij   |
| 1.29E-10 | -0.3113829 | 0.029 | 0.129 | 1.83E-06 | Granulocytes Rbm6     |
| 1.30E-10 | -0.2900488 | 0.016 | 0.108 | 1.84E-06 | Granulocytes Spcs3    |
| 1.31E-10 | -0.3244155 | 0.02  | 0.114 | 1.86E-06 | Granulocytes Smim15   |
| 1.31E-10 | 1.03334974 | 0.301 | 0.22  | 1.86E-06 | Granulocytes Sbn01    |
| 1.33E-10 | 0.81473015 | 0.137 | 0.067 | 1.89E-06 | Granulocytes Pira2    |
| 1.34E-10 | -0.2963171 | 0.102 | 0.239 | 1.89E-06 | Granulocytes Smpdl3a  |
| 1.35E-10 | -0.2973514 | 0.016 | 0.108 | 1.91E-06 | Granulocytes BC029722 |
| 1.38E-10 | -0.4094033 | 0.02  | 0.113 | 1.96E-06 | Granulocytes Ripk2    |
| 1.39E-10 | -0.3511621 | 0.012 | 0.1   | 1.97E-06 | Granulocytes Dup3     |
| 1.40E-10 | -0.2952102 | 0.016 | 0.107 | 1.98E-06 | Granulocytes Lin37    |
| 1.48E-10 | -0.3852169 | 0.018 | 0.11  | 2.10E-06 | Granulocytes Prkd2    |
| 1.50E-10 | -0.3060704 | 0.012 | 0.1   | 2.13E-06 | Granulocytes Ercc1    |
| 1.55E-10 | -0.2848945 | 0.031 | 0.132 | 2.20E-06 | Granulocytes Rab22a   |
| 1.59E-10 | -0.255018  | 0.014 | 0.105 | 2.25E-06 | Granulocytes Zfx      |
| 1.61E-10 | -0.324667  | 0.022 | 0.118 | 2.27E-06 | Granulocytes Srsf4    |
| 1.65E-10 | -0.3186265 | 0.049 | 0.161 | 2.34E-06 | Granulocytes Mlec     |
| 1.68E-10 | -0.3070797 | 0.033 | 0.135 | 2.37E-06 | Granulocytes Poldip3  |
| 1.78E-10 | 1.01091426 | 0.313 | 0.231 | 2.52E-06 | Granulocytes Vsir     |
| 1.85E-10 | -0.349297  | 0.016 | 0.107 | 2.62E-06 | Granulocytes Nfx1     |
| 1.86E-10 | -0.3539208 | 0.018 | 0.11  | 2.63E-06 | Granulocytes Ktn1     |
| 1.87E-10 | -0.2737716 | 0.014 | 0.103 | 2.64E-06 | Granulocytes Nop16    |
| 1.88E-10 | -0.3069621 | 0.012 | 0.1   | 2.66E-06 | Granulocytes Sec63    |
| 1.92E-10 | -0.5493923 | 0.014 | 0.102 | 2.72E-06 | Granulocytes Siglecg  |
| 1.95E-10 | -0.3486353 | 0.016 | 0.107 | 2.76E-06 | Granulocytes Emsy     |
| 1.98E-10 | 0.74079223 | 0.131 | 0.062 | 2.80E-06 | Granulocytes Il18rap  |
| 1.99E-10 | -0.3118166 | 0.012 | 0.1   | 2.82E-06 | Granulocytes Aebp2    |
| 2.00E-10 | -0.3503772 | 0.016 | 0.106 | 2.83E-06 | Granulocytes Aak1     |
| 2.01E-10 | 1.00587336 | 0.272 | 0.186 | 2.85E-06 | Granulocytes Pag1     |
| 2.02E-10 | -0.3330433 | 0.031 | 0.131 | 2.86E-06 | Granulocytes Bdp1     |
| 2.11E-10 | -0.315063  | 0.014 | 0.102 | 2.99E-06 | Granulocytes Utp23    |
| 2.15E-10 | -0.3277345 | 0.02  | 0.113 | 3.05E-06 | Granulocytes Zmiz2    |
| 2.20E-10 | -0.2973855 | 0.012 | 0.1   | 3.11E-06 | Granulocytes Dynlt3   |
| 2.25E-10 | -0.445865  | 0.053 | 0.166 | 3.19E-06 | Granulocytes Gbp2     |
| 2.28E-10 | -0.3101324 | 0.014 | 0.103 | 3.23E-06 | Granulocytes Pigk     |
| 2.31E-10 | -0.2998828 | 0.055 | 0.168 | 3.27E-06 | Granulocytes Sh3gl1   |
| 2.31E-10 | -0.2502043 | 0.022 | 0.117 | 3.27E-06 | Granulocytes Slc48a1  |
| 2.35E-10 | -0.3764517 | 0.018 | 0.11  | 3.33E-06 | Granulocytes Zbtb20   |
| 2.38E-10 | -0.3070684 | 0.018 | 0.109 | 3.38E-06 | Granulocytes Ncbp2    |
| 2.39E-10 | -0.2984268 | 0.072 | 0.194 | 3.38E-06 | Granulocytes Dgkd     |
| 2.43E-10 | -0.3058952 | 0.016 | 0.107 | 3.43E-06 | Granulocytes Lsg1     |
| 2.52E-10 | -0.2752869 | 0.035 | 0.136 | 3.57E-06 | Granulocytes Vps51    |
| 2.64E-10 | -0.2792972 | 0.018 | 0.109 | 3.74E-06 | Granulocytes Gtf2f2   |
| 2.66E-10 | -0.3117448 | 0.047 | 0.156 | 3.77E-06 | Granulocytes Numa1    |
| 2.78E-10 | -0.2972941 | 0.037 | 0.139 | 3.93E-06 | Granulocytes Akap8l   |
| 2.82E-10 | -0.3033032 | 0.031 | 0.129 | 4.00E-06 | Granulocytes Brd9     |

|          |            |       |       |          |                        |
|----------|------------|-------|-------|----------|------------------------|
| 2.85E-10 | -0.2758589 | 0.037 | 0.139 | 4.04E-06 | Granulocytes Clptm1    |
| 2.86E-10 | -0.3120098 | 0.016 | 0.106 | 4.05E-06 | Granulocytes Tmem106a  |
| 2.92E-10 | 1.02131925 | 0.162 | 0.087 | 4.14E-06 | Granulocytes Trf       |
| 2.94E-10 | -0.2882476 | 0.02  | 0.112 | 4.17E-06 | Granulocytes Mplkip    |
| 2.98E-10 | -0.2614442 | 0.047 | 0.156 | 4.21E-06 | Granulocytes Map3k2    |
| 3.03E-10 | 0.71203603 | 0.125 | 0.058 | 4.30E-06 | Granulocytes Map3k5    |
| 3.09E-10 | -0.3311848 | 0.031 | 0.129 | 4.37E-06 | Granulocytes Sertad2   |
| 3.09E-10 | -0.308787  | 0.027 | 0.122 | 4.38E-06 | Granulocytes Rcn2      |
| 3.10E-10 | -0.3071365 | 0.014 | 0.102 | 4.38E-06 | Granulocytes Pgam5     |
| 3.14E-10 | -0.263672  | 0.057 | 0.172 | 4.44E-06 | Granulocytes Dync1i2   |
| 3.20E-10 | -0.2910915 | 0.037 | 0.138 | 4.53E-06 | Granulocytes Desi2     |
| 3.21E-10 | -0.2707654 | 0.047 | 0.154 | 4.55E-06 | Granulocytes Mfsd1     |
| 3.26E-10 | -0.2679277 | 0.033 | 0.131 | 4.61E-06 | Granulocytes Qars      |
| 3.36E-10 | -0.3029413 | 0.043 | 0.149 | 4.75E-06 | Granulocytes Lair1     |
| 3.39E-10 | -0.2601408 | 0.031 | 0.129 | 4.80E-06 | Granulocytes Zrsr2     |
| 3.50E-10 | 0.74659455 | 0.493 | 0.462 | 4.96E-06 | Granulocytes Atp6v0b   |
| 3.53E-10 | -0.3196695 | 0.033 | 0.133 | 5.00E-06 | Granulocytes Tle4      |
| 3.55E-10 | -0.3443092 | 0.027 | 0.121 | 5.02E-06 | Granulocytes Herc2     |
| 3.73E-10 | -0.2797377 | 0.499 | 0.731 | 5.27E-06 | Granulocytes Pfdn5     |
| 3.74E-10 | -0.33698   | 0.027 | 0.122 | 5.30E-06 | Granulocytes Ubxn2a    |
| 3.78E-10 | -0.3778678 | 0.076 | 0.194 | 5.36E-06 | Granulocytes Chd2      |
| 3.88E-10 | -0.4565168 | 0.828 | 0.929 | 5.50E-06 | Granulocytes Gapdh     |
| 3.91E-10 | -0.3065674 | 0.027 | 0.121 | 5.53E-06 | Granulocytes Usp48     |
| 3.96E-10 | -0.3626414 | 0.022 | 0.115 | 5.60E-06 | Granulocytes Hip1r     |
| 3.99E-10 | -0.2812914 | 0.02  | 0.112 | 5.65E-06 | Granulocytes Ldb1      |
| 4.03E-10 | -0.2943825 | 0.037 | 0.138 | 5.71E-06 | Granulocytes Ddx41     |
| 4.14E-10 | -0.3451985 | 0.018 | 0.107 | 5.86E-06 | Granulocytes Secisbp2l |
| 4.31E-10 | -0.2687767 | 0.016 | 0.104 | 6.10E-06 | Granulocytes Synj2bp   |
| 4.36E-10 | -0.3017075 | 0.022 | 0.115 | 6.17E-06 | Granulocytes Pid1      |
| 4.42E-10 | 0.86536918 | 0.276 | 0.191 | 6.26E-06 | Granulocytes Lamp2     |
| 4.80E-10 | -0.2952192 | 0.031 | 0.127 | 6.79E-06 | Granulocytes Cyfip1    |
| 4.84E-10 | 0.84767695 | 0.135 | 0.067 | 6.85E-06 | Granulocytes Man1b1    |
| 5.13E-10 | -0.2710835 | 0.067 | 0.184 | 7.26E-06 | Granulocytes Kdm5a     |
| 5.15E-10 | -0.354527  | 0.016 | 0.103 | 7.29E-06 | Granulocytes Uhmk1     |
| 5.27E-10 | -0.3244367 | 0.018 | 0.106 | 7.45E-06 | Granulocytes Trnt1     |
| 5.47E-10 | -0.4441426 | 0.018 | 0.105 | 7.74E-06 | Granulocytes Gm15987   |
| 5.63E-10 | -0.2573861 | 0.016 | 0.102 | 7.97E-06 | Granulocytes Rab9      |
| 5.68E-10 | -0.2520507 | 0.016 | 0.104 | 8.03E-06 | Granulocytes Sfswap    |
| 5.85E-10 | -0.3690939 | 0.02  | 0.109 | 8.28E-06 | Granulocytes Golga4    |
| 5.87E-10 | 1.00267432 | 0.256 | 0.176 | 8.31E-06 | Granulocytes Chp1      |
| 5.90E-10 | -0.3238178 | 0.031 | 0.127 | 8.35E-06 | Granulocytes Nlrc5     |
| 6.20E-10 | -0.5084077 | 0.022 | 0.111 | 8.77E-06 | Granulocytes Lrp1      |
| 6.40E-10 | -0.2597583 | 0.027 | 0.119 | 9.06E-06 | Granulocytes Zdhhc4    |
| 6.43E-10 | -0.2621577 | 0.078 | 0.197 | 9.10E-06 | Granulocytes Rnf10     |
| 6.61E-10 | 0.87127507 | 0.344 | 0.265 | 9.35E-06 | Granulocytes Itgal     |
| 6.62E-10 | -0.2703116 | 0.047 | 0.15  | 9.37E-06 | Granulocytes Tor1a     |
| 6.95E-10 | -0.3386939 | 0.018 | 0.106 | 9.83E-06 | Granulocytes Rpia      |
| 7.17E-10 | -0.2739522 | 0.033 | 0.13  | 1.01E-05 | Granulocytes Ncaph2    |

|          |            |       |       |          |                          |
|----------|------------|-------|-------|----------|--------------------------|
| 7.24E-10 | -0.2770262 | 0.018 | 0.106 | 1.03E-05 | Granulocytes Ilf3        |
| 7.90E-10 | -0.3194685 | 0.016 | 0.101 | 1.12E-05 | Granulocytes Asf1a       |
| 8.70E-10 | -0.3478033 | 0.016 | 0.102 | 1.23E-05 | Granulocytes Zbtb38      |
| 8.76E-10 | -0.3109977 | 0.027 | 0.118 | 1.24E-05 | Granulocytes Atp9b       |
| 8.98E-10 | -0.2635978 | 0.027 | 0.119 | 1.27E-05 | Granulocytes Mym1        |
| 9.12E-10 | -0.2845567 | 0.022 | 0.112 | 1.29E-05 | Granulocytes Uso1        |
| 9.53E-10 | -0.2953151 | 0.033 | 0.128 | 1.35E-05 | Granulocytes 4833420G171 |
| 9.68E-10 | 1.08124769 | 0.393 | 0.342 | 1.37E-05 | Granulocytes Emd         |
| 9.84E-10 | -0.308627  | 0.049 | 0.153 | 1.39E-05 | Granulocytes Rnf145      |
| 9.97E-10 | -0.2673302 | 0.027 | 0.118 | 1.41E-05 | Granulocytes Chd8        |
| 1.01E-09 | 0.79537064 | 0.147 | 0.077 | 1.43E-05 | Granulocytes Tmem43      |
| 1.05E-09 | -0.2552043 | 0.045 | 0.148 | 1.49E-05 | Granulocytes Cdk17       |
| 1.08E-09 | 0.79783097 | 0.153 | 0.082 | 1.53E-05 | Granulocytes Arrdc3      |
| 1.11E-09 | -0.2923415 | 0.039 | 0.137 | 1.58E-05 | Granulocytes Celf1       |
| 1.15E-09 | -0.3508703 | 0.027 | 0.117 | 1.63E-05 | Granulocytes Cdkn2aip    |
| 1.19E-09 | 0.95200838 | 0.137 | 0.071 | 1.68E-05 | Granulocytes Arrdc4      |
| 1.25E-09 | -0.2864334 | 0.016 | 0.1   | 1.78E-05 | Granulocytes Lars        |
| 1.26E-09 | -0.2518614 | 0.02  | 0.107 | 1.78E-05 | Granulocytes Ganab       |
| 1.27E-09 | -0.4973105 | 0.029 | 0.119 | 1.79E-05 | Granulocytes Ccl9        |
| 1.34E-09 | -0.2821176 | 0.824 | 0.895 | 1.90E-05 | Granulocytes Cfl1        |
| 1.41E-09 | -0.301543  | 0.039 | 0.135 | 2.00E-05 | Granulocytes Coro7       |
| 1.43E-09 | -0.2643311 | 0.027 | 0.118 | 2.02E-05 | Granulocytes Ppm1h       |
| 1.44E-09 | 0.6596583  | 0.125 | 0.06  | 2.03E-05 | Granulocytes Hk3         |
| 1.51E-09 | -0.2852598 | 0.025 | 0.112 | 2.14E-05 | Granulocytes Abhd16a     |
| 1.53E-09 | 0.72821455 | 0.108 | 0.049 | 2.16E-05 | Granulocytes Fbxo31      |
| 1.64E-09 | -0.3039158 | 0.053 | 0.159 | 2.32E-05 | Granulocytes Gatad2b     |
| 1.68E-09 | 0.98251252 | 0.374 | 0.319 | 2.38E-05 | Granulocytes Vasp        |
| 1.74E-09 | -0.5323146 | 0.027 | 0.115 | 2.46E-05 | Granulocytes Serpinb1a   |
| 1.80E-09 | -0.291559  | 0.02  | 0.106 | 2.55E-05 | Granulocytes Coro2a      |
| 1.82E-09 | -0.297724  | 0.031 | 0.122 | 2.58E-05 | Granulocytes Epb41       |
| 1.83E-09 | -0.2815087 | 0.045 | 0.145 | 2.59E-05 | Granulocytes Arfgap2     |
| 1.85E-09 | -0.3192877 | 0.022 | 0.109 | 2.62E-05 | Granulocytes Araf        |
| 1.87E-09 | -0.3593154 | 0.02  | 0.105 | 2.64E-05 | Granulocytes Hbs1l       |
| 1.94E-09 | -0.2690053 | 0.131 | 0.268 | 2.75E-05 | Granulocytes Wsb1        |
| 2.15E-09 | -0.4549968 | 0.051 | 0.152 | 3.05E-05 | Granulocytes Clec4a3     |
| 2.25E-09 | -0.2971168 | 0.025 | 0.112 | 3.18E-05 | Granulocytes Brwd1       |
| 2.51E-09 | -0.2506041 | 0.037 | 0.131 | 3.56E-05 | Granulocytes Alkbh5      |
| 2.57E-09 | -0.3190936 | 0.992 | 0.999 | 3.64E-05 | Granulocytes Gm42418     |
| 2.83E-09 | 0.82385246 | 0.219 | 0.139 | 4.00E-05 | Granulocytes Lyst        |
| 2.89E-09 | -0.292413  | 0.051 | 0.153 | 4.10E-05 | Granulocytes Ccdc88c     |
| 2.96E-09 | -0.3010047 | 0.055 | 0.16  | 4.19E-05 | Granulocytes Pitpnc1     |
| 3.01E-09 | -0.3125599 | 0.018 | 0.1   | 4.26E-05 | Granulocytes Gtf3c2      |
| 3.10E-09 | -0.2539159 | 0.025 | 0.111 | 4.38E-05 | Granulocytes Rbbp8       |
| 3.19E-09 | -0.2600526 | 0.027 | 0.115 | 4.52E-05 | Granulocytes Fkbp5       |
| 3.20E-09 | -0.3035371 | 0.02  | 0.104 | 4.53E-05 | Granulocytes Stag1       |
| 3.23E-09 | -0.3072744 | 0.022 | 0.107 | 4.57E-05 | Granulocytes Erlec1      |
| 3.49E-09 | -0.3228346 | 0.022 | 0.106 | 4.93E-05 | Granulocytes Nup153      |
| 3.75E-09 | 0.83077533 | 0.147 | 0.079 | 5.31E-05 | Granulocytes Cln3        |



|          |            |       |       |            |                       |
|----------|------------|-------|-------|------------|-----------------------|
| 4.05E-09 | -0.2734808 | 0.049 | 0.148 | 5.73E-05   | Granulocytes Swt1     |
| 4.05E-09 | 0.73443247 | 0.235 | 0.15  | 5.73E-05   | Granulocytes App      |
| 4.07E-09 | 0.91241031 | 0.172 | 0.1   | 5.76E-05   | Granulocytes Timp2    |
| 4.17E-09 | -0.2717684 | 0.027 | 0.114 | 5.90E-05   | Granulocytes Prr7     |
| 4.25E-09 | -0.3040307 | 0.454 | 0.658 | 6.01E-05   | Granulocytes Myl12a   |
| 4.57E-09 | -0.2708091 | 0.045 | 0.143 | 6.47E-05   | Granulocytes Osbp18   |
| 4.62E-09 | -0.2774554 | 0.035 | 0.126 | 6.54E-05   | Granulocytes Usp9x    |
| 4.67E-09 | -0.3326367 | 0.02  | 0.102 | 6.61E-05   | Granulocytes Mepce    |
| 4.99E-09 | -0.2748364 | 0.022 | 0.105 | 7.06E-05   | Granulocytes Ddx23    |
| 5.28E-09 | -0.2781957 | 0.029 | 0.115 | 7.47E-05   | Granulocytes Diablo   |
| 5.53E-09 | 1.17586461 | 0.192 | 0.119 | 7.82E-05   | Granulocytes Cdc42ep3 |
| 6.22E-09 | -0.2589043 | 0.953 | 0.976 | 8.80E-05   | Granulocytes Ubb      |
| 6.23E-09 | 1.04615869 | 0.239 | 0.162 | 8.82E-05   | Granulocytes Adrb2    |
| 6.78E-09 | -0.3175661 | 0.025 | 0.107 | 9.59E-05   | Granulocytes Xpo1     |
| 7.07E-09 | -1.0902561 | 0.027 | 0.11  | 0.00010005 | Granulocytes Cxcl10   |
| 7.33E-09 | -0.4784112 | 0.143 | 0.276 | 0.00010375 | Granulocytes Ccl3     |
| 7.40E-09 | -0.2501519 | 0.029 | 0.115 | 0.00010477 | Granulocytes Chtf8    |
| 7.47E-09 | -0.2625339 | 0.027 | 0.111 | 0.00010571 | Granulocytes Thap3    |
| 7.56E-09 | -0.2881478 | 0.025 | 0.107 | 0.00010705 | Granulocytes Sec24c   |
| 8.51E-09 | -0.4991607 | 0.031 | 0.115 | 0.00012046 | Granulocytes Nupr1    |
| 9.55E-09 | 0.82934756 | 0.151 | 0.084 | 0.00013515 | Granulocytes Impact   |
| 9.74E-09 | 1.02466774 | 0.319 | 0.256 | 0.00013787 | Granulocytes Mbnl2    |
| 9.94E-09 | -0.2650197 | 0.027 | 0.11  | 0.00014073 | Granulocytes Pex13    |
| 1.13E-08 | 0.84347259 | 0.176 | 0.105 | 0.00015986 | Granulocytes Tnrc18   |
| 1.61E-08 | -0.2519029 | 0.027 | 0.107 | 0.00022825 | Granulocytes Rnf146   |
| 1.61E-08 | -0.2730164 | 0.033 | 0.117 | 0.00022847 | Granulocytes Atf6     |
| 1.77E-08 | -0.6892635 | 0.534 | 0.646 | 0.00025078 | Granulocytes Klf2     |
| 1.77E-08 | -0.2778678 | 0.035 | 0.121 | 0.0002509  | Granulocytes Utrn     |
| 1.88E-08 | -0.2729354 | 0.031 | 0.113 | 0.00026616 | Granulocytes Gpbp111  |
| 2.25E-08 | 0.84486915 | 0.303 | 0.232 | 0.00031907 | Granulocytes Ehd1     |
| 2.33E-08 | 0.48421589 | 0.658 | 0.663 | 0.00032974 | Granulocytes Atp6v0c  |
| 2.42E-08 | -0.2825691 | 0.035 | 0.12  | 0.00034188 | Granulocytes Hmgcr    |
| 2.45E-08 | -0.3128536 | 0.022 | 0.1   | 0.00034648 | Granulocytes Ifitm10  |
| 2.58E-08 | -0.2642568 | 0.031 | 0.113 | 0.00036583 | Granulocytes Irf2bp2  |
| 3.18E-08 | -0.2564897 | 0.067 | 0.168 | 0.00045056 | Granulocytes Thoc2    |
| 5.20E-08 | -0.2673985 | 0.027 | 0.103 | 0.0007355  | Granulocytes Trim59   |
| 5.93E-08 | -0.2971929 | 0.041 | 0.125 | 0.00083965 | Granulocytes Eif2ak3  |
| 8.41E-08 | 1.07428265 | 0.266 | 0.199 | 0.00119001 | Granulocytes Ptp4a1   |
| 8.95E-08 | 0.87982345 | 0.153 | 0.091 | 0.00126689 | Granulocytes St3gal4  |
| 9.28E-08 | 0.95000364 | 0.454 | 0.452 | 0.00131348 | Granulocytes Cox17    |
| 1.10E-07 | -0.2699106 | 0.029 | 0.104 | 0.00155584 | Granulocytes Gtf3c1   |
| 1.43E-07 | -0.312896  | 0.029 | 0.103 | 0.002026   | Granulocytes Cmah     |
| 1.61E-07 | 0.73306962 | 0.155 | 0.092 | 0.00227973 | Granulocytes Klra2    |
| 1.79E-07 | 1.03187865 | 0.11  | 0.057 | 0.0025296  | Granulocytes Id1      |
| 1.83E-07 | -0.2639033 | 0.029 | 0.102 | 0.00259464 | Granulocytes Irf3     |
| 2.10E-07 | 0.79074529 | 0.143 | 0.083 | 0.00296616 | Granulocytes Ebi3     |
| 2.28E-07 | 0.78531183 | 0.254 | 0.186 | 0.00322251 | Granulocytes Myo1f    |
| 2.81E-07 | 0.79157616 | 0.176 | 0.112 | 0.00398225 | Granulocytes Abr      |

|          |            |       |       |            |                          |
|----------|------------|-------|-------|------------|--------------------------|
| 3.30E-07 | 0.67075111 | 0.519 | 0.549 | 0.00466664 | Granulocytes Arpc5       |
| 3.56E-07 | 0.65461043 | 0.489 | 0.46  | 0.00504468 | Granulocytes Ier5        |
| 3.61E-07 | 0.98747692 | 0.28  | 0.221 | 0.00511125 | Granulocytes Gliplr1     |
| 3.79E-07 | -0.259921  | 0.031 | 0.102 | 0.00536643 | Granulocytes Xrn1        |
| 3.99E-07 | 0.85503537 | 0.38  | 0.345 | 0.0056436  | Granulocytes Cap1        |
| 4.48E-07 | 0.84110604 | 0.315 | 0.254 | 0.00633833 | Granulocytes Neur13      |
| 5.01E-07 | 0.8207964  | 0.364 | 0.321 | 0.00708844 | Granulocytes Ptpn6       |
| 5.90E-07 | 0.74039469 | 0.17  | 0.109 | 0.00835775 | Granulocytes Fam129a     |
| 6.51E-07 | 0.94945528 | 0.223 | 0.16  | 0.00921355 | Granulocytes Slc6a6      |
| 7.90E-07 | 0.63363463 | 0.517 | 0.545 | 0.0111792  | Granulocytes Gnb2        |
| 8.06E-07 | -0.4297811 | 0.037 | 0.109 | 0.01140492 | Granulocytes Ly6i        |
| 8.22E-07 | 0.69466288 | 0.139 | 0.082 | 0.01163908 | Granulocytes Vamp5       |
| 9.60E-07 | 0.76083871 | 0.119 | 0.066 | 0.01359313 | Granulocytes Rnasel      |
| 1.16E-06 | 0.90153427 | 0.389 | 0.366 | 0.01642473 | Granulocytes Fmnl1       |
| 1.18E-06 | 0.87530801 | 0.188 | 0.127 | 0.01663478 | Granulocytes Reep3       |
| 1.31E-06 | 0.94072378 | 0.358 | 0.327 | 0.01859708 | Granulocytes Timm10b     |
| 1.34E-06 | 0.72610353 | 0.17  | 0.109 | 0.01902848 | Granulocytes Cfp43       |
| 1.70E-06 | 0.75349014 | 0.141 | 0.085 | 0.02405751 | Granulocytes Ltb4r1      |
| 1.76E-06 | 0.91545938 | 0.239 | 0.183 | 0.02486827 | Granulocytes Trim30a     |
| 1.83E-06 | 1.32383379 | 0.384 | 0.359 | 0.02587698 | Granulocytes Cstb        |
| 2.08E-06 | 0.92927322 | 0.178 | 0.12  | 0.02940033 | Granulocytes Flot1       |
| 3.10E-06 | 0.85622581 | 0.153 | 0.098 | 0.04386985 | Granulocytes Med31       |
| 3.14E-06 | 0.77363777 | 0.184 | 0.126 | 0.0444405  | Granulocytes Sema4a      |
| 3.48E-06 | 0.76899666 | 0.135 | 0.082 | 0.04923999 | Granulocytes Wbp1l       |
| 3.75E-06 | 0.90450049 | 0.382 | 0.359 | 0.05303995 | Granulocytes Mpc1        |
| 3.92E-06 | 0.71638445 | 0.139 | 0.086 | 0.05549555 | Granulocytes Stk40       |
| 5.81E-06 | 0.60250078 | 0.151 | 0.096 | 0.08225648 | Granulocytes Xylt1       |
| 6.82E-06 | 0.66242463 | 0.141 | 0.088 | 0.09650634 | Granulocytes Snrk        |
| 9.10E-06 | 0.67656347 | 0.141 | 0.089 | 0.12879764 | Granulocytes Clec4a2     |
| 9.14E-06 | 0.77554172 | 0.227 | 0.173 | 0.12938805 | Granulocytes Il17ra      |
| 1.06E-05 | 0.6248126  | 0.115 | 0.067 | 0.14983937 | Granulocytes Trim30d     |
| 1.09E-05 | 0.74763849 | 0.127 | 0.078 | 0.1545025  | Granulocytes Pnpla7      |
| 1.30E-05 | 0.77684337 | 0.178 | 0.125 | 0.1836208  | Granulocytes Mettl9      |
| 1.51E-05 | -0.2656362 | 0.045 | 0.108 | 0.21418765 | Granulocytes B3gnt5      |
| 1.76E-05 | 0.80480895 | 0.151 | 0.1   | 0.24985193 | Granulocytes Ell2        |
| 1.81E-05 | 0.80480016 | 0.139 | 0.09  | 0.25644547 | Granulocytes Dclre1c     |
| 2.39E-05 | 0.62955605 | 0.133 | 0.085 | 0.33775617 | Granulocytes Adssl1      |
| 2.44E-05 | 0.79272217 | 0.288 | 0.246 | 0.34555704 | Granulocytes Lbr         |
| 2.69E-05 | -0.5236833 | 0.133 | 0.215 | 0.38113055 | Granulocytes Ly6c2       |
| 2.84E-05 | 0.58403582 | 0.106 | 0.063 | 0.40253529 | Granulocytes Rab32       |
| 3.37E-05 | 0.79235826 | 0.301 | 0.264 | 0.47700354 | Granulocytes Ssh2        |
| 3.42E-05 | 0.94133706 | 0.305 | 0.272 | 0.48374667 | Granulocytes Ddx6        |
| 4.33E-05 | 0.91246812 | 0.178 | 0.127 | 0.61316584 | Granulocytes Xdh         |
| 5.04E-05 | 0.58613923 | 0.417 | 0.398 | 0.71317184 | Granulocytes Itgb2       |
| 5.09E-05 | 0.6752179  | 0.145 | 0.098 | 0.72060272 | Granulocytes Mboat7      |
| 6.87E-05 | 0.63055914 | 0.489 | 0.516 | 0.97184407 | Granulocytes Cd53        |
| 7.56E-05 | 0.85434656 | 0.35  | 0.336 | 1          | Granulocytes 1810058I24R |
| 7.94E-05 | 0.62994673 | 0.519 | 0.564 | 1          | Granulocytes Gpx4        |

|            |            |       |       |                         |
|------------|------------|-------|-------|-------------------------|
| 8.81E-05   | 0.62452324 | 0.102 | 0.062 | 1 Granulocytes Braf     |
| 9.06E-05   | 0.65653539 | 0.485 | 0.529 | 1 Granulocytes Dazap2   |
| 9.08E-05   | 0.80186171 | 0.213 | 0.168 | 1 Granulocytes Map2k3   |
| 0.00010364 | 0.61467827 | 0.44  | 0.459 | 1 Granulocytes Sh3glb1  |
| 0.00011065 | 0.70439303 | 0.147 | 0.103 | 1 Granulocytes Ttyh3    |
| 0.00011657 | 0.76602015 | 0.192 | 0.146 | 1 Granulocytes Mapkapk2 |
| 0.00011823 | 0.76785276 | 0.117 | 0.075 | 1 Granulocytes Klf7     |
| 0.00013643 | 0.80556827 | 0.194 | 0.15  | 1 Granulocytes Myd88    |
| 0.00014887 | -0.3419709 | 0.112 | 0.183 | 1 Granulocytes Csf1r    |
| 0.00017388 | 0.30040737 | 0.237 | 0.379 | 1 Granulocytes Dnajb6   |
| 0.00017903 | 0.90185493 | 0.374 | 0.372 | 1 Granulocytes Dennd4a  |
| 0.00019256 | 0.57075822 | 0.374 | 0.338 | 1 Granulocytes Lyn      |
| 0.00025061 | 0.48933994 | 0.1   | 0.062 | 1 Granulocytes Tmem38b  |
| 0.00025422 | 0.74373234 | 0.18  | 0.136 | 1 Granulocytes Mpp1     |
| 0.00027801 | 0.81068339 | 0.202 | 0.16  | 1 Granulocytes Sbno2    |
| 0.00027938 | 0.76796545 | 0.391 | 0.392 | 1 Granulocytes Hmgn2    |
| 0.00029051 | 0.30049491 | 0.231 | 0.363 | 1 Granulocytes Rp9      |
| 0.00029069 | 0.75169326 | 0.229 | 0.189 | 1 Granulocytes Cd84     |
| 0.00029083 | 0.72131706 | 0.233 | 0.194 | 1 Granulocytes Kdm7a    |
| 0.00032617 | 0.80066672 | 0.192 | 0.153 | 1 Granulocytes Sidt2    |
| 0.00038099 | 0.60642307 | 0.104 | 0.067 | 1 Granulocytes Bnip3    |
| 0.00047666 | 0.7971859  | 0.229 | 0.195 | 1 Granulocytes Dynlt1b  |
| 0.00048898 | 0.50768944 | 0.11  | 0.073 | 1 Granulocytes Rnf40    |
| 0.00058832 | 0.74887307 | 0.235 | 0.201 | 1 Granulocytes Ppt1     |
| 0.00060432 | 0.26182225 | 0.417 | 0.592 | 1 Granulocytes Tspo     |
| 0.00073021 | 0.67183387 | 0.401 | 0.414 | 1 Granulocytes Apbb1ip  |
| 0.00081508 | 0.28255183 | 0.072 | 0.13  | 1 Granulocytes Mbd2     |
| 0.00091236 | 0.26167553 | 0.217 | 0.329 | 1 Granulocytes Tra2a    |
| 0.00094681 | 0.50489593 | 0.217 | 0.172 | 1 Granulocytes Mpeg1    |
| 0.00098771 | 0.66815392 | 0.182 | 0.146 | 1 Granulocytes Mapk14   |
| 0.00110121 | 0.76053815 | 0.356 | 0.357 | 1 Granulocytes Rbms1    |
| 0.00113206 | 0.63483588 | 0.272 | 0.246 | 1 Granulocytes Arrb2    |
| 0.00117928 | 0.48651394 | 0.121 | 0.084 | 1 Granulocytes G6pdx    |
| 0.0012304  | 0.80920788 | 0.227 | 0.198 | 1 Granulocytes Taf7     |
| 0.00123983 | 0.59950882 | 0.123 | 0.086 | 1 Granulocytes Rab27a   |
| 0.00134275 | 0.61499297 | 0.133 | 0.096 | 1 Granulocytes Dusp16   |
| 0.00146383 | 0.56936013 | 0.1   | 0.067 | 1 Granulocytes Aldh3b1  |
| 0.00148814 | 0.68604002 | 0.119 | 0.084 | 1 Granulocytes Slc22a15 |
| 0.00151459 | 0.2755688  | 0.137 | 0.214 | 1 Granulocytes Mat2b    |
| 0.00151675 | 0.74407965 | 0.182 | 0.146 | 1 Granulocytes Isg20    |
| 0.00158529 | 0.71323814 | 0.217 | 0.184 | 1 Granulocytes Pten     |
| 0.00161165 | 0.25810215 | 0.217 | 0.33  | 1 Granulocytes Lgals9   |
| 0.00165857 | 0.62178474 | 0.151 | 0.115 | 1 Granulocytes Msl1     |
| 0.00176088 | 0.34996184 | 0.571 | 0.588 | 1 Granulocytes Nr4a1    |
| 0.00191327 | 0.98342389 | 0.219 | 0.188 | 1 Granulocytes Cks2     |
| 0.00209981 | 0.70584014 | 0.311 | 0.302 | 1 Granulocytes Ncf4     |
| 0.0022761  | 0.50353768 | 0.106 | 0.074 | 1 Granulocytes Ralb     |
| 0.00233383 | 0.78610589 | 0.427 | 0.452 | 1 Granulocytes Dusp5    |

|            |            |       |       |           |              |          |
|------------|------------|-------|-------|-----------|--------------|----------|
| 0.00235385 | 0.72061488 | 0.327 | 0.333 | 1         | Granulocytes | Iscu     |
| 0.00248694 | 0.33157615 | 0.29  | 0.43  | 1         | Granulocytes | Irf1     |
| 0.00285863 | 0.2811869  | 0.188 | 0.282 | 1         | Granulocytes | Isy1     |
| 0.00307387 | 0.48958073 | 0.108 | 0.075 | 1         | Granulocytes | Nbeal2   |
| 0.0031554  | 0.66588915 | 0.227 | 0.199 | 1         | Granulocytes | Pbxip1   |
| 0.00318191 | 0.57715149 | 0.19  | 0.156 | 1         | Granulocytes | Hck      |
| 0.00324661 | 0.66342054 | 0.19  | 0.158 | 1         | Granulocytes | Snx18    |
| 0.00329218 | 0.62735873 | 0.117 | 0.085 | 1         | Granulocytes | Sec14l1  |
| 0.00336854 | 0.71010004 | 0.35  | 0.36  | 1         | Granulocytes | Hcls1    |
| 0.00361318 | 0.2710302  | 0.157 | 0.239 | 1         | Granulocytes | Pik3cd   |
| 0.003895   | 0.68342679 | 0.198 | 0.168 | 1         | Granulocytes | Ttc7     |
| 0.00454935 | 0.28476361 | 0.09  | 0.145 | 1         | Granulocytes | Atp6v1a  |
| 0.00461161 | 0.69687902 | 0.266 | 0.248 | 1         | Granulocytes | Pstpip1  |
| 0.00500101 | 0.60005404 | 0.119 | 0.088 | 1         | Granulocytes | Tbc1d14  |
| 0.00545307 | 0.32308244 | 0.155 | 0.233 | 1         | Granulocytes | Cib1     |
| 0.0054552  | 0.66604461 | 0.164 | 0.135 | 1         | Granulocytes | Dstn     |
| 0.00563794 | 0.54307006 | 0.1   | 0.072 | 1         | Granulocytes | Samd4b   |
| 0.00612153 | 0.80169491 | 0.301 | 0.297 | 1         | Granulocytes | Cdk11b   |
| 0.00657637 | 0.66021954 | 0.143 | 0.114 | 1         | Granulocytes | Notch2   |
| 0.0068841  | 0.64792471 | 0.192 | 0.165 | 1         | Granulocytes | Rnf130   |
| 0.00692014 | 0.27012017 | 0.164 | 0.243 | 1         | Granulocytes | Frg1     |
| 0.0069416  | 0.32497362 | 0.129 | 0.197 | 1         | Granulocytes | Rassf5   |
| 0.00747342 | 0.57149401 | 0.188 | 0.157 | 1         | Granulocytes | Map4k2   |
| 0.0083269  | 0.63907445 | 0.149 | 0.121 | 1         | Granulocytes | N4bp1    |
| 0          | 4.72174577 | 0.905 | 0.154 | 0         | NK cells     | Gzma     |
| 0          | 3.14717649 | 0.757 | 0.01  | 0         | NK cells     | Klrb1c   |
| 0          | 2.77118821 | 0.386 | 0.004 | 0         | NK cells     | Klra4    |
| 0          | 2.75221279 | 0.684 | 0.077 | 0         | NK cells     | Serpib9  |
| 0          | 2.66891678 | 0.741 | 0.066 | 0         | NK cells     | Klre1    |
| 0          | 2.59444878 | 0.635 | 0.003 | 0         | NK cells     | Ncr1     |
| 0          | 2.5273885  | 0.451 | 0.002 | 0         | NK cells     | Klra8    |
| 0          | 2.37047601 | 0.392 | 0.005 | 0         | NK cells     | Klra7    |
| 0          | 2.34912767 | 0.414 | 0.006 | 0         | NK cells     | Klra9    |
| 0          | 1.99003945 | 0.346 | 0.001 | 0         | NK cells     | Cma1     |
| 0          | 1.83213998 | 0.405 | 0.02  | 0         | NK cells     | Eomes    |
| 0          | 1.81123116 | 0.389 | 0.008 | 0         | NK cells     | Klrc2    |
| 0          | 1.77187611 | 0.397 | 0.014 | 0         | NK cells     | Il12rb2  |
| 0          | 1.51002141 | 0.324 | 0.003 | 0         | NK cells     | Klrb1a   |
| 2.31E-283  | 1.15811037 | 0.262 | 0.006 | 3.27E-279 | NK cells     | Klrb1f   |
| 9.13E-258  | 1.94008329 | 0.284 | 0.01  | 1.29E-253 | NK cells     | Klra3    |
| 6.51E-249  | 1.47756591 | 0.176 | 0.001 | 9.22E-245 | NK cells     | Serpib9b |
| 7.02E-244  | 0.77435093 | 0.165 | 0     | 9.94E-240 | NK cells     | Khdc1a   |
| 2.94E-243  | 2.2958452  | 0.73  | 0.13  | 4.16E-239 | NK cells     | Klrk1    |
| 1.02E-234  | 1.62458458 | 0.351 | 0.022 | 1.45E-230 | NK cells     | Klri2    |
| 1.64E-228  | 1.95060352 | 0.373 | 0.027 | 2.31E-224 | NK cells     | Klrb1b   |
| 2.99E-223  | 1.60062712 | 0.316 | 0.017 | 4.23E-219 | NK cells     | Klrg1    |
| 2.41E-199  | 2.21268074 | 0.568 | 0.089 | 3.41E-195 | NK cells     | Serpib6b |
| 1.99E-198  | 1.02269035 | 0.265 | 0.013 | 2.81E-194 | NK cells     | Adamts14 |

|           |            |       |       |           |          |          |
|-----------|------------|-------|-------|-----------|----------|----------|
| 3.45E-189 | 2.33705911 | 0.695 | 0.147 | 4.88E-185 | NK cells | Prf1     |
| 8.43E-186 | 1.56165102 | 0.446 | 0.052 | 1.19E-181 | NK cells | Atp1b1   |
| 1.01E-169 | 0.53262856 | 0.149 | 0.003 | 1.43E-165 | NK cells | Clnk     |
| 1.10E-163 | 2.12627543 | 0.786 | 0.233 | 1.56E-159 | NK cells | Il2rb    |
| 1.14E-151 | 0.92420813 | 0.208 | 0.011 | 1.61E-147 | NK cells | Samd3    |
| 1.25E-151 | 1.9989168  | 0.865 | 0.292 | 1.76E-147 | NK cells | Ctsw     |
| 2.09E-144 | 1.70300633 | 0.503 | 0.089 | 2.96E-140 | NK cells | Txk      |
| 4.72E-136 | 2.75034551 | 0.751 | 0.294 | 6.68E-132 | NK cells | Irf8     |
| 9.36E-131 | 2.4334337  | 0.714 | 0.213 | 1.32E-126 | NK cells | Gzmb     |
| 1.98E-125 | 1.51015519 | 0.981 | 0.396 | 2.80E-121 | NK cells | Fcer1g   |
| 2.84E-124 | 1.41609187 | 0.395 | 0.064 | 4.02E-120 | NK cells | Ctla2b   |
| 1.18E-123 | 1.66540242 | 0.522 | 0.114 | 1.67E-119 | NK cells | Fasl     |
| 6.10E-114 | 1.33696587 | 0.957 | 0.413 | 8.64E-110 | NK cells | Tyrobp   |
| 2.24E-113 | 0.7312714  | 0.141 | 0.006 | 3.17E-109 | NK cells | Gpc1     |
| 3.30E-109 | 0.57491596 | 0.135 | 0.006 | 4.67E-105 | NK cells | Styk1    |
| 3.58E-108 | 1.50604559 | 0.432 | 0.089 | 5.07E-104 | NK cells | Arsb     |
| 2.37E-105 | 1.53711915 | 0.473 | 0.109 | 3.35E-101 | NK cells | Gm19585  |
| 4.26E-104 | 1.50815738 | 0.524 | 0.139 | 6.03E-100 | NK cells | Ugcg     |
| 1.91E-100 | 1.79478712 | 0.359 | 0.061 | 2.70E-96  | NK cells | Xcl1     |
| 7.09E-99  | 1.775831   | 0.581 | 0.183 | 1.00E-94  | NK cells | Pik3r1   |
| 1.72E-97  | 1.39264858 | 0.981 | 0.545 | 2.44E-93  | NK cells | AW112010 |
| 2.85E-95  | 0.75766889 | 0.162 | 0.012 | 4.04E-91  | NK cells | Spry2    |
| 1.55E-93  | 1.15051168 | 0.986 | 0.436 | 2.20E-89  | NK cells | Nkg7     |
| 6.54E-92  | 1.95783099 | 0.581 | 0.182 | 9.26E-88  | NK cells | Ctla2a   |
| 3.44E-91  | -3.2277481 | 0.065 | 0.647 | 4.87E-87  | NK cells | Ifi2712a |
| 1.88E-88  | 1.05710691 | 0.303 | 0.049 | 2.66E-84  | NK cells | Pde2a    |
| 1.55E-87  | 2.3695965  | 0.53  | 0.158 | 2.19E-83  | NK cells | Cd7      |
| 6.58E-86  | 0.99269628 | 0.105 | 0.004 | 9.31E-82  | NK cells | Klra1    |
| 6.83E-85  | 1.0456128  | 0.986 | 0.533 | 9.67E-81  | NK cells | Ccl5     |
| 1.52E-83  | 1.24218237 | 0.749 | 0.283 | 2.15E-79  | NK cells | Klrd1    |
| 9.18E-83  | 1.16777122 | 0.284 | 0.047 | 1.30E-78  | NK cells | Car2     |
| 1.38E-82  | 1.67877601 | 0.819 | 0.481 | 1.95E-78  | NK cells | Ifngr1   |
| 1.01E-74  | 1.12189002 | 0.373 | 0.088 | 1.43E-70  | NK cells | Syt13    |
| 1.16E-74  | -4.5595144 | 0.227 | 0.667 | 1.65E-70  | NK cells | Cd74     |
| 4.28E-74  | 1.67701691 | 0.846 | 0.554 | 6.05E-70  | NK cells | Zfp3612  |
| 6.01E-74  | 0.63610219 | 0.143 | 0.012 | 8.51E-70  | NK cells | Qrfp     |
| 1.54E-72  | 1.20807839 | 0.827 | 0.438 | 2.18E-68  | NK cells | Anxa2    |
| 5.91E-70  | 0.56088007 | 0.135 | 0.011 | 8.37E-66  | NK cells | Emid1    |
| 8.06E-69  | 0.87088891 | 0.989 | 0.923 | 1.14E-64  | NK cells | Tmsb10   |
| 7.89E-68  | 1.00713543 | 0.222 | 0.034 | 1.12E-63  | NK cells | Nrap     |
| 1.76E-67  | 1.27158955 | 0.811 | 0.488 | 2.49E-63  | NK cells | Selplg   |
| 2.30E-65  | 1.16825402 | 0.368 | 0.096 | 3.26E-61  | NK cells | Tbx21    |
| 2.74E-65  | 0.9845878  | 0.278 | 0.055 | 3.87E-61  | NK cells | Il18rap  |
| 6.22E-65  | 0.63090212 | 0.157 | 0.017 | 8.80E-61  | NK cells | S1pr5    |
| 7.03E-65  | -4.0173076 | 0.059 | 0.528 | 9.96E-61  | NK cells | H2-Eb1   |
| 2.41E-63  | 1.04562376 | 0.335 | 0.082 | 3.41E-59  | NK cells | Ifitm10  |
| 7.70E-63  | -2.8384805 | 0.132 | 0.578 | 1.09E-58  | NK cells | Ctss     |
| 9.59E-63  | -3.9574267 | 0.062 | 0.517 | 1.36E-58  | NK cells | H2-Ab1   |

|          |            |       |       |          |          |            |
|----------|------------|-------|-------|----------|----------|------------|
| 6.37E-62 | -4.0954925 | 0.086 | 0.532 | 9.02E-58 | NK cells | H2-Aa      |
| 1.29E-61 | -1.4768602 | 0.951 | 0.958 | 1.82E-57 | NK cells | Fth1       |
| 7.62E-61 | 0.56307607 | 0.111 | 0.009 | 1.08E-56 | NK cells | Rac3       |
| 9.91E-61 | 1.12265347 | 0.757 | 0.407 | 1.40E-56 | NK cells | 1-Sep      |
| 2.25E-60 | 1.0850782  | 0.903 | 0.697 | 3.18E-56 | NK cells | H2afz      |
| 1.00E-58 | 0.7719388  | 0.168 | 0.023 | 1.42E-54 | NK cells | Sulf2      |
| 5.04E-58 | 1.17364949 | 0.351 | 0.1   | 7.13E-54 | NK cells | Dok2       |
| 3.90E-57 | 1.02391276 | 0.27  | 0.059 | 5.52E-53 | NK cells | Itgax      |
| 2.89E-56 | 1.00726527 | 0.281 | 0.065 | 4.09E-52 | NK cells | Adora2a    |
| 3.08E-55 | 0.84836358 | 0.224 | 0.044 | 4.35E-51 | NK cells | 1700025G04 |
| 3.21E-55 | 0.92814963 | 0.195 | 0.033 | 4.54E-51 | NK cells | Lpin1      |
| 6.34E-55 | 1.02324563 | 0.884 | 0.507 | 8.97E-51 | NK cells | Lgals1     |
| 2.48E-53 | 0.84554624 | 0.205 | 0.038 | 3.50E-49 | NK cells | Olfm1      |
| 2.37E-52 | 1.19216662 | 0.386 | 0.127 | 3.36E-48 | NK cells | Hsd11b1    |
| 3.08E-51 | 1.07624714 | 0.87  | 0.667 | 4.36E-47 | NK cells | Ptpcr      |
| 2.30E-50 | 0.97382268 | 0.765 | 0.442 | 3.26E-46 | NK cells | Hcst       |
| 2.46E-49 | 1.17523891 | 0.805 | 0.554 | 3.49E-45 | NK cells | Vps37b     |
| 7.93E-49 | 0.88991223 | 0.476 | 0.174 | 1.12E-44 | NK cells | Cd9        |
| 1.70E-47 | 1.09980814 | 0.703 | 0.394 | 2.41E-43 | NK cells | Ahnak      |
| 1.86E-47 | 0.81328093 | 0.23  | 0.051 | 2.63E-43 | NK cells | Camk2n1    |
| 2.45E-47 | 1.08254669 | 0.651 | 0.334 | 3.47E-43 | NK cells | Itgb1      |
| 1.11E-45 | 0.86231094 | 0.678 | 0.324 | 1.57E-41 | NK cells | Sh2d2a     |
| 2.55E-45 | 0.49574652 | 0.119 | 0.015 | 3.61E-41 | NK cells | Pogk       |
| 1.05E-44 | 1.45013963 | 0.497 | 0.218 | 1.49E-40 | NK cells | Gem        |
| 1.19E-44 | 0.76928493 | 0.932 | 0.794 | 1.68E-40 | NK cells | Myl6       |
| 4.67E-44 | -1.5852457 | 0.105 | 0.497 | 6.61E-40 | NK cells | Ltb        |
| 5.07E-44 | 0.92104681 | 0.822 | 0.538 | 7.17E-40 | NK cells | Tagln2     |
| 9.30E-44 | -2.1264029 | 0.097 | 0.479 | 1.32E-39 | NK cells | Ly6a       |
| 2.58E-43 | 0.4211677  | 0.116 | 0.015 | 3.65E-39 | NK cells | Cuedc1     |
| 1.18E-42 | 1.19580849 | 0.651 | 0.386 | 1.68E-38 | NK cells | Itgb2      |
| 1.48E-42 | 1.12479695 | 0.538 | 0.25  | 2.09E-38 | NK cells | Bhlhe40    |
| 1.54E-42 | -2.193068  | 0.059 | 0.426 | 2.17E-38 | NK cells | Cd3e       |
| 3.33E-42 | 0.9502987  | 0.224 | 0.054 | 4.72E-38 | NK cells | Tmem37     |
| 1.79E-41 | 1.24241535 | 0.616 | 0.355 | 2.53E-37 | NK cells | Ubal2      |
| 5.42E-41 | 0.76998028 | 0.151 | 0.026 | 7.67E-37 | NK cells | Vegfa      |
| 7.29E-41 | 0.49516661 | 0.154 | 0.027 | 1.03E-36 | NK cells | Rnf157     |
| 1.62E-40 | 0.89099739 | 0.192 | 0.042 | 2.30E-36 | NK cells | Ern1       |
| 2.98E-40 | 0.99140887 | 0.749 | 0.492 | 4.22E-36 | NK cells | Jak1       |
| 4.97E-40 | 0.97655469 | 0.562 | 0.276 | 7.04E-36 | NK cells | Ccnd2      |
| 2.25E-39 | 0.62596603 | 0.97  | 0.95  | 3.19E-35 | NK cells | Pfn1       |
| 4.10E-39 | -1.8944916 | 0.011 | 0.344 | 5.80E-35 | NK cells | Spi1       |
| 9.20E-39 | 1.21471296 | 0.573 | 0.333 | 1.30E-34 | NK cells | Ywhaq      |
| 8.84E-38 | 0.52892421 | 0.151 | 0.028 | 1.25E-33 | NK cells | Smad3      |
| 1.43E-37 | 0.74669895 | 0.235 | 0.063 | 2.02E-33 | NK cells | Il18r1     |
| 3.72E-37 | 1.19947076 | 0.432 | 0.195 | 5.27E-33 | NK cells | Bcl2       |
| 3.78E-37 | 0.69668982 | 0.143 | 0.026 | 5.35E-33 | NK cells | Arl4d      |
| 5.67E-37 | -2.522386  | 0.035 | 0.361 | 8.02E-33 | NK cells | Cd8b1      |
| 7.96E-37 | 0.58407964 | 0.151 | 0.029 | 1.13E-32 | NK cells | Ppm1j      |

|          |            |       |       |          |          |          |
|----------|------------|-------|-------|----------|----------|----------|
| 4.19E-36 | 0.61273667 | 0.838 | 0.432 | 5.93E-32 | NK cells | Ms4a4b   |
| 5.08E-36 | 0.89931759 | 0.522 | 0.257 | 7.19E-32 | NK cells | Itgal    |
| 1.30E-35 | -1.5474968 | 0.016 | 0.329 | 1.85E-31 | NK cells | Ctsh     |
| 1.63E-35 | -1.85367   | 0.5   | 0.694 | 2.31E-31 | NK cells | Gpx1     |
| 1.71E-35 | -2.7056853 | 0.014 | 0.323 | 2.41E-31 | NK cells | Alox5ap  |
| 4.56E-35 | -1.5863087 | 0.014 | 0.322 | 6.46E-31 | NK cells | Ly86     |
| 8.72E-35 | 1.10794865 | 0.276 | 0.089 | 1.23E-30 | NK cells | Klrc1    |
| 1.33E-34 | 0.68560045 | 0.741 | 0.456 | 1.88E-30 | NK cells | Ctsd     |
| 2.45E-34 | 0.84617992 | 0.646 | 0.393 | 3.47E-30 | NK cells | Rnaset2b |
| 2.80E-34 | 1.02128663 | 0.673 | 0.439 | 3.96E-30 | NK cells | Dusp5    |
| 4.83E-34 | -3.0917545 | 0.03  | 0.333 | 6.84E-30 | NK cells | Ifitm3   |
| 5.72E-34 | -2.2672717 | 0.024 | 0.326 | 8.10E-30 | NK cells | Cd8a     |
| 5.76E-34 | -1.9465365 | 0.154 | 0.454 | 8.15E-30 | NK cells | Lgals3   |
| 5.95E-34 | -1.8637838 | 0.108 | 0.423 | 8.42E-30 | NK cells | Cd3d     |
| 9.49E-34 | 0.94787139 | 0.584 | 0.324 | 1.34E-29 | NK cells | Gimap4   |
| 9.69E-34 | 0.96145163 | 0.335 | 0.127 | 1.37E-29 | NK cells | Lmna     |
| 1.02E-33 | -2.4066237 | 0.324 | 0.583 | 1.44E-29 | NK cells | Cst3     |
| 1.23E-33 | -2.8288533 | 0.027 | 0.327 | 1.74E-29 | NK cells | Ifitm2   |
| 1.24E-33 | 0.67904696 | 0.141 | 0.028 | 1.75E-29 | NK cells | As3mt    |
| 1.41E-33 | 1.1061446  | 0.538 | 0.304 | 1.99E-29 | NK cells | Ccnd3    |
| 2.09E-32 | -1.9825936 | 0.162 | 0.454 | 2.96E-28 | NK cells | Ctsb     |
| 3.57E-32 | 0.81502339 | 0.292 | 0.103 | 5.05E-28 | NK cells | Padi2    |
| 5.68E-32 | -1.648589  | 0.024 | 0.32  | 8.05E-28 | NK cells | Cd83     |
| 7.08E-32 | -1.3248159 | 0.024 | 0.316 | 1.00E-27 | NK cells | Gm8369   |
| 1.99E-31 | 0.90540274 | 0.335 | 0.13  | 2.81E-27 | NK cells | Ccr2     |
| 1.99E-31 | 0.86863782 | 0.554 | 0.319 | 2.82E-27 | NK cells | Epsti1   |
| 2.17E-31 | 0.79944542 | 0.165 | 0.039 | 3.07E-27 | NK cells | Dhrs3    |
| 2.30E-31 | -1.917499  | 0.097 | 0.393 | 3.25E-27 | NK cells | Ifi30    |
| 4.40E-31 | -4.1814265 | 0.084 | 0.365 | 6.23E-27 | NK cells | Lyz2     |
| 5.28E-31 | 0.8954949  | 0.305 | 0.114 | 7.47E-27 | NK cells | Nabp1    |
| 5.96E-31 | -1.6101347 | 0.014 | 0.293 | 8.44E-27 | NK cells | Cybb     |
| 6.39E-31 | -1.7466365 | 0.149 | 0.454 | 9.04E-27 | NK cells | Cd3g     |
| 1.47E-30 | 0.85973959 | 0.408 | 0.19  | 2.09E-26 | NK cells | Spn      |
| 2.01E-30 | -1.4872382 | 0.086 | 0.375 | 2.84E-26 | NK cells | Ctsz     |
| 2.11E-30 | 0.8365198  | 0.478 | 0.237 | 2.98E-26 | NK cells | Prkch    |
| 3.13E-30 | -3.1041617 | 0.035 | 0.312 | 4.43E-26 | NK cells | Apoe     |
| 5.24E-30 | 0.6882085  | 0.246 | 0.079 | 7.42E-26 | NK cells | Rbpms    |
| 9.97E-30 | 0.82091438 | 0.662 | 0.402 | 1.41E-25 | NK cells | Id2      |
| 1.26E-29 | 0.92884673 | 0.3   | 0.115 | 1.79E-25 | NK cells | Mmd      |
| 2.63E-29 | -2.7994487 | 0.008 | 0.274 | 3.72E-25 | NK cells | Ccl6     |
| 2.63E-29 | 0.7249009  | 0.684 | 0.411 | 3.72E-25 | NK cells | Nr4a2    |
| 6.39E-29 | -1.3347331 | 0.097 | 0.384 | 9.05E-25 | NK cells | H2-DMA   |
| 6.68E-29 | -1.9139425 | 0.076 | 0.36  | 9.45E-25 | NK cells | Plac8    |
| 1.70E-28 | -1.8036728 | 0.011 | 0.272 | 2.40E-24 | NK cells | Lst1     |
| 1.79E-28 | -1.3395193 | 0.23  | 0.507 | 2.54E-24 | NK cells | Samhd1   |
| 1.88E-28 | -1.3960778 | 0.092 | 0.378 | 2.67E-24 | NK cells | Bcl2a1b  |
| 2.66E-28 | -1.0996006 | 0.924 | 0.934 | 3.76E-24 | NK cells | Ftl1     |
| 3.14E-28 | -2.4072302 | 0.03  | 0.294 | 4.44E-24 | NK cells | Ccr7     |

|          |            |       |       |          |          |             |
|----------|------------|-------|-------|----------|----------|-------------|
| 3.16E-28 | 0.52296063 | 0.978 | 0.913 | 4.47E-24 | NK cells | H2-K1       |
| 4.17E-28 | 0.43403274 | 0.138 | 0.03  | 5.91E-24 | NK cells | Dapk2       |
| 4.38E-28 | 0.86630215 | 0.249 | 0.087 | 6.20E-24 | NK cells | Klhdc2      |
| 7.55E-27 | 0.45293838 | 0.135 | 0.03  | 1.07E-22 | NK cells | Rab37       |
| 1.07E-26 | -1.463483  | 0.022 | 0.273 | 1.51E-22 | NK cells | Ncf2        |
| 1.31E-26 | 0.77963918 | 0.341 | 0.15  | 1.85E-22 | NK cells | Metrn1      |
| 2.27E-26 | -3.8732864 | 0.035 | 0.284 | 3.22E-22 | NK cells | Il1b        |
| 2.39E-26 | 0.75930138 | 0.211 | 0.068 | 3.38E-22 | NK cells | Osbp13      |
| 3.54E-26 | -2.0095662 | 0.014 | 0.259 | 5.02E-22 | NK cells | Cd79b       |
| 4.19E-26 | 0.68678087 | 0.232 | 0.08  | 5.94E-22 | NK cells | Peak1       |
| 7.46E-26 | 0.79586413 | 0.614 | 0.396 | 1.06E-21 | NK cells | H2-Q6       |
| 2.21E-25 | -1.2695978 | 0.011 | 0.248 | 3.13E-21 | NK cells | Pld4        |
| 2.59E-25 | -1.0995121 | 0.043 | 0.294 | 3.67E-21 | NK cells | Gm2a        |
| 3.08E-25 | -2.4408379 | 0.016 | 0.255 | 4.36E-21 | NK cells | Wfdc17      |
| 3.33E-25 | 0.82481166 | 0.454 | 0.242 | 4.71E-21 | NK cells | Gimap5      |
| 4.17E-25 | -1.329324  | 0.105 | 0.361 | 5.90E-21 | NK cells | Unc93b1     |
| 7.21E-25 | -1.2595809 | 0     | 0.229 | 1.02E-20 | NK cells | Cyp4f18     |
| 1.06E-24 | -2.0877695 | 0.03  | 0.268 | 1.50E-20 | NK cells | Ier3        |
| 1.12E-24 | 0.78631375 | 0.495 | 0.292 | 1.58E-20 | NK cells | Anxa6       |
| 1.14E-24 | 0.45518709 | 0.13  | 0.03  | 1.62E-20 | NK cells | Pear1       |
| 1.38E-24 | 0.85045741 | 0.616 | 0.414 | 1.95E-20 | NK cells | Arl6ip5     |
| 4.17E-24 | 0.51085908 | 0.524 | 0.268 | 5.90E-20 | NK cells | Cst7        |
| 4.97E-24 | -1.2374566 | 0.446 | 0.66  | 7.04E-20 | NK cells | Fos         |
| 6.23E-24 | -1.3066227 | 0.014 | 0.241 | 8.82E-20 | NK cells | Cd68        |
| 1.05E-23 | 0.47339598 | 0.941 | 0.79  | 1.49E-19 | NK cells | Rac2        |
| 1.07E-23 | -1.3321087 | 0.049 | 0.288 | 1.51E-19 | NK cells | Lilrb4a     |
| 1.46E-23 | -1.6804888 | 0.019 | 0.247 | 2.07E-19 | NK cells | H2-DMb2     |
| 1.92E-23 | 0.77999328 | 0.297 | 0.13  | 2.72E-19 | NK cells | Kcnab2      |
| 1.97E-23 | -0.9688825 | 0.143 | 0.404 | 2.79E-19 | NK cells | Capg        |
| 2.55E-23 | -1.407099  | 0.027 | 0.256 | 3.61E-19 | NK cells | H2-DMb1     |
| 2.76E-23 | 0.6450976  | 0.83  | 0.631 | 3.91E-19 | NK cells | S100a10     |
| 3.24E-23 | -2.8346266 | 0.032 | 0.257 | 4.58E-19 | NK cells | Cd79a       |
| 4.20E-23 | 0.44692527 | 0.135 | 0.034 | 5.95E-19 | NK cells | Baiap3      |
| 6.43E-23 | 0.59009836 | 0.803 | 0.65  | 9.10E-19 | NK cells | Calm2       |
| 6.98E-23 | -2.0731342 | 0.014 | 0.231 | 9.88E-19 | NK cells | Ebf1        |
| 1.81E-22 | 0.75799099 | 0.73  | 0.588 | 2.56E-18 | NK cells | Gnas        |
| 2.44E-22 | 0.54865189 | 0.157 | 0.045 | 3.45E-18 | NK cells | Nedd4       |
| 3.10E-22 | 0.73060737 | 0.411 | 0.217 | 4.39E-18 | NK cells | D16Ertd472e |
| 3.21E-22 | 0.99689548 | 0.419 | 0.23  | 4.55E-18 | NK cells | Bcl2l11     |
| 3.55E-22 | 0.652241   | 0.554 | 0.338 | 5.03E-18 | NK cells | Efhd2       |
| 4.14E-22 | -1.7200006 | 0.005 | 0.214 | 5.86E-18 | NK cells | Tgfb1       |
| 4.26E-22 | -0.9699555 | 0.005 | 0.215 | 6.03E-18 | NK cells | Dok3        |
| 4.89E-22 | 0.69061576 | 0.286 | 0.123 | 6.92E-18 | NK cells | Agpat3      |
| 5.03E-22 | 0.58482773 | 0.643 | 0.383 | 7.12E-18 | NK cells | Ccl4        |
| 7.14E-22 | 0.78410336 | 0.443 | 0.254 | 1.01E-17 | NK cells | Esyt1       |
| 8.29E-22 | 0.51269342 | 0.965 | 0.939 | 1.17E-17 | NK cells | Actg1       |
| 1.01E-21 | 0.46680343 | 0.978 | 0.944 | 1.43E-17 | NK cells | H2-D1       |
| 1.14E-21 | 0.67296162 | 0.841 | 0.678 | 1.61E-17 | NK cells | Eif5a       |



|          |            |       |       |          |          |          |
|----------|------------|-------|-------|----------|----------|----------|
| 1.20E-21 | -1.0859873 | 0.008 | 0.217 | 1.70E-17 | NK cells | Cd81     |
| 1.23E-21 | -0.8113696 | 0.832 | 0.863 | 1.75E-17 | NK cells | H3f3a    |
| 1.25E-21 | -0.5289609 | 0.684 | 0.833 | 1.77E-17 | NK cells | Ly6e     |
| 1.43E-21 | -2.2721255 | 0.014 | 0.223 | 2.02E-17 | NK cells | Ly6d     |
| 1.62E-21 | -1.3714801 | 0.022 | 0.233 | 2.29E-17 | NK cells | Marcks11 |
| 1.64E-21 | -0.6680159 | 0.876 | 0.864 | 2.33E-17 | NK cells | Rps19    |
| 7.19E-21 | 0.54494935 | 0.189 | 0.064 | 1.02E-16 | NK cells | Hhex     |
| 7.20E-21 | 0.69301091 | 0.53  | 0.312 | 1.02E-16 | NK cells | Lck      |
| 7.28E-21 | -0.8438883 | 0.032 | 0.248 | 1.03E-16 | NK cells | Ehd1     |
| 8.52E-21 | 0.39522678 | 0.124 | 0.032 | 1.21E-16 | NK cells | Syne3    |
| 1.07E-20 | -1.4067229 | 0.016 | 0.218 | 1.52E-16 | NK cells | H2-Ob    |
| 1.22E-20 | -1.3994138 | 0.005 | 0.202 | 1.73E-16 | NK cells | Cd24a    |
| 1.57E-20 | -1.307191  | 0.041 | 0.251 | 2.22E-16 | NK cells | Gngt2    |
| 4.00E-20 | -1.0153027 | 0     | 0.19  | 5.66E-16 | NK cells | Pirb     |
| 4.20E-20 | 0.64874907 | 0.238 | 0.096 | 5.94E-16 | NK cells | Prkcq    |
| 6.56E-20 | -1.3463045 | 0.019 | 0.217 | 9.28E-16 | NK cells | Lgmn     |
| 7.28E-20 | -1.0967206 | 0.081 | 0.304 | 1.03E-15 | NK cells | Bcl2a1d  |
| 7.75E-20 | -1.4163671 | 0.032 | 0.235 | 1.10E-15 | NK cells | Ms4a6c   |
| 8.02E-20 | -1.7313031 | 0.073 | 0.285 | 1.14E-15 | NK cells | Plaur    |
| 9.04E-20 | 0.5416621  | 0.451 | 0.249 | 1.28E-15 | NK cells | Skap1    |
| 9.94E-20 | 0.56207662 | 0.786 | 0.607 | 1.41E-15 | NK cells | Il2rg    |
| 1.04E-19 | -1.0631685 | 0.003 | 0.191 | 1.48E-15 | NK cells | Plbd1    |
| 1.22E-19 | -0.7652124 | 0.008 | 0.201 | 1.72E-15 | NK cells | Cd86     |
| 2.05E-19 | -1.2311976 | 0.003 | 0.188 | 2.90E-15 | NK cells | Csf1r    |
| 2.83E-19 | -0.847164  | 0.568 | 0.716 | 4.01E-15 | NK cells | Lsp1     |
| 3.37E-19 | -1.3186222 | 0.027 | 0.225 | 4.76E-15 | NK cells | Grn      |
| 4.78E-19 | 0.51641429 | 0.865 | 0.733 | 6.77E-15 | NK cells | Ier2     |
| 5.75E-19 | 0.69946833 | 0.678 | 0.526 | 8.14E-15 | NK cells | Cnn2     |
| 7.59E-19 | 0.62165641 | 0.708 | 0.538 | 1.07E-14 | NK cells | Dad1     |
| 9.14E-19 | -0.8444102 | 0.03  | 0.224 | 1.29E-14 | NK cells | Rgs10    |
| 1.02E-18 | -0.9010172 | 0.005 | 0.186 | 1.44E-14 | NK cells | Themis2  |
| 1.04E-18 | -0.8682102 | 0.022 | 0.214 | 1.48E-14 | NK cells | Pou2f2   |
| 1.05E-18 | 0.64337634 | 0.719 | 0.566 | 1.48E-14 | NK cells | Cd47     |
| 1.27E-18 | -0.8566039 | 0.003 | 0.181 | 1.80E-14 | NK cells | Lrrc25   |
| 1.42E-18 | 0.50983862 | 0.178 | 0.063 | 2.02E-14 | NK cells | Lpcat4   |
| 1.62E-18 | 0.75531926 | 0.324 | 0.166 | 2.29E-14 | NK cells | Zmiz1    |
| 1.66E-18 | -0.9081091 | 0.014 | 0.198 | 2.35E-14 | NK cells | Csf2ra   |
| 1.95E-18 | 0.55531746 | 0.203 | 0.078 | 2.76E-14 | NK cells | Rhoc     |
| 2.02E-18 | -1.3663641 | 0.038 | 0.231 | 2.87E-14 | NK cells | Lag3     |
| 2.64E-18 | 0.72655136 | 0.276 | 0.131 | 3.74E-14 | NK cells | Lta4h    |
| 2.71E-18 | -1.9711105 | 0.135 | 0.342 | 3.84E-14 | NK cells | Msrb1    |
| 2.71E-18 | -0.740922  | 0.003 | 0.179 | 3.84E-14 | NK cells | Ifngr2   |
| 3.03E-18 | 0.72869177 | 0.627 | 0.458 | 4.29E-14 | NK cells | Dusp2    |
| 3.11E-18 | 0.5350911  | 0.759 | 0.558 | 4.41E-14 | NK cells | H2-Q7    |
| 3.23E-18 | -1.0983599 | 0.011 | 0.192 | 4.57E-14 | NK cells | Trib1    |
| 3.67E-18 | 0.53379858 | 0.735 | 0.517 | 5.20E-14 | NK cells | Ptprcap  |
| 3.89E-18 | -0.6802274 | 0.062 | 0.273 | 5.50E-14 | NK cells | Tnfaip8  |
| 4.13E-18 | -1.246488  | 0.008 | 0.186 | 5.84E-14 | NK cells | Pla2g7   |

|          |            |       |       |          |          |             |
|----------|------------|-------|-------|----------|----------|-------------|
| 4.94E-18 | -3.1907992 | 0.014 | 0.192 | 7.00E-14 | NK cells | Cxcl2       |
| 5.06E-18 | -1.0853792 | 0.008 | 0.184 | 7.17E-14 | NK cells | Mpeg1       |
| 7.31E-18 | 0.76108957 | 0.338 | 0.175 | 1.03E-13 | NK cells | Gimap9      |
| 8.98E-18 | 0.6411374  | 0.676 | 0.53  | 1.27E-13 | NK cells | Sqstm1      |
| 9.03E-18 | -0.824479  | 0.005 | 0.178 | 1.28E-13 | NK cells | Nrp1        |
| 9.26E-18 | 0.55235044 | 0.808 | 0.697 | 1.31E-13 | NK cells | Pabpc1      |
| 9.52E-18 | -1.6985881 | 0.019 | 0.198 | 1.35E-13 | NK cells | Cd14        |
| 1.12E-17 | -1.1242868 | 0     | 0.168 | 1.58E-13 | NK cells | Fcgr4       |
| 1.67E-17 | -2.5250965 | 0.011 | 0.183 | 2.37E-13 | NK cells | C1qc        |
| 1.72E-17 | -1.1086555 | 0.062 | 0.258 | 2.44E-13 | NK cells | Ets2        |
| 1.96E-17 | 0.70409081 | 0.551 | 0.382 | 2.78E-13 | NK cells | Tpm4        |
| 1.99E-17 | -1.0635562 | 0.073 | 0.269 | 2.82E-13 | NK cells | Tpd52       |
| 2.37E-17 | 0.62376453 | 0.541 | 0.368 | 3.35E-13 | NK cells | Zyx         |
| 2.39E-17 | 0.38631329 | 0.119 | 0.033 | 3.38E-13 | NK cells | Kcnq5       |
| 2.51E-17 | 0.40564162 | 0.143 | 0.046 | 3.56E-13 | NK cells | Fhl2        |
| 2.59E-17 | -1.1131721 | 0.054 | 0.249 | 3.67E-13 | NK cells | Lilr4b      |
| 3.17E-17 | -1.0186635 | 0.265 | 0.479 | 4.49E-13 | NK cells | Mcl1        |
| 3.20E-17 | -1.4563026 | 0.014 | 0.184 | 4.53E-13 | NK cells | Fcmmr       |
| 3.27E-17 | -1.4658213 | 0.057 | 0.246 | 4.63E-13 | NK cells | Ctla4       |
| 3.35E-17 | -1.1768954 | 0.008 | 0.178 | 4.75E-13 | NK cells | Slc16a3     |
| 4.15E-17 | -0.7746817 | 0.008 | 0.177 | 5.87E-13 | NK cells | Rassf4      |
| 4.40E-17 | 0.55225908 | 0.316 | 0.156 | 6.22E-13 | NK cells | Anxa1       |
| 5.44E-17 | -1.3510227 | 0.011 | 0.178 | 7.69E-13 | NK cells | Ms4a1       |
| 5.46E-17 | -0.7715029 | 0.003 | 0.166 | 7.73E-13 | NK cells | Hck         |
| 5.72E-17 | 0.44616738 | 0.157 | 0.054 | 8.09E-13 | NK cells | 2700038G22l |
| 5.85E-17 | -1.3531065 | 0.003 | 0.166 | 8.27E-13 | NK cells | Mafb        |
| 6.50E-17 | -1.0544646 | 0.008 | 0.175 | 9.20E-13 | NK cells | Aif1        |
| 8.14E-17 | 0.7435524  | 0.397 | 0.236 | 1.15E-12 | NK cells | Runx3       |
| 9.95E-17 | 0.54700564 | 0.697 | 0.54  | 1.41E-12 | NK cells | Ndufa4      |
| 1.12E-16 | -1.8629953 | 0.005 | 0.168 | 1.59E-12 | NK cells | Hp          |
| 1.15E-16 | 0.72625305 | 0.292 | 0.148 | 1.63E-12 | NK cells | Map7d1      |
| 1.24E-16 | -0.7779604 | 0.008 | 0.171 | 1.76E-12 | NK cells | Gsn         |
| 2.05E-16 | 0.55779359 | 0.376 | 0.204 | 2.90E-12 | NK cells | Gpr171      |
| 2.05E-16 | -1.0018519 | 0.17  | 0.384 | 2.91E-12 | NK cells | Rel         |
| 2.21E-16 | 0.31636081 | 0.843 | 0.704 | 3.12E-12 | NK cells | Btg2        |
| 2.31E-16 | -2.5780792 | 0.022 | 0.188 | 3.27E-12 | NK cells | C1qa        |
| 2.51E-16 | -0.853353  | 0     | 0.156 | 3.55E-12 | NK cells | Cd5         |
| 2.63E-16 | -0.8257691 | 0.008 | 0.17  | 3.72E-12 | NK cells | Marcks      |
| 2.94E-16 | -0.8816646 | 0.005 | 0.164 | 4.17E-12 | NK cells | App         |
| 3.03E-16 | 0.42781341 | 0.47  | 0.288 | 4.29E-12 | NK cells | Mxd1        |
| 3.15E-16 | -0.9191784 | 0.043 | 0.219 | 4.45E-12 | NK cells | Ms4a4c      |
| 3.18E-16 | 0.61302233 | 0.468 | 0.302 | 4.50E-12 | NK cells | Dnajc3      |
| 3.40E-16 | 0.80274073 | 0.27  | 0.134 | 4.81E-12 | NK cells | Irf2bpl     |
| 3.61E-16 | -0.7563598 | 0.003 | 0.16  | 5.10E-12 | NK cells | Havcr2      |
| 4.78E-16 | 0.82019218 | 0.332 | 0.182 | 6.76E-12 | NK cells | Stat4       |
| 5.82E-16 | -0.928715  | 0.011 | 0.17  | 8.23E-12 | NK cells | Ralgps2     |
| 5.99E-16 | -0.7654175 | 0.016 | 0.181 | 8.48E-12 | NK cells | Ncf1        |
| 6.61E-16 | -1.1116229 | 0.005 | 0.16  | 9.36E-12 | NK cells | Cd19        |

|          |            |       |       |          |          |          |
|----------|------------|-------|-------|----------|----------|----------|
| 7.53E-16 | 0.34116596 | 1     | 0.99  | 1.07E-11 | NK cells | Actb     |
| 9.39E-16 | 0.6512322  | 0.443 | 0.278 | 1.33E-11 | NK cells | Tes      |
| 1.02E-15 | 0.54029486 | 0.211 | 0.089 | 1.45E-11 | NK cells | Lax1     |
| 1.32E-15 | -0.7372831 | 0.884 | 0.924 | 1.86E-11 | NK cells | Gapdh    |
| 1.52E-15 | -0.8018154 | 0.151 | 0.361 | 2.15E-11 | NK cells | Stat1    |
| 1.74E-15 | 0.68991259 | 0.354 | 0.202 | 2.47E-11 | NK cells | Pdcd4    |
| 1.83E-15 | -0.7119836 | 0.003 | 0.153 | 2.60E-11 | NK cells | Clec12a  |
| 1.87E-15 | -0.7868642 | 0.003 | 0.153 | 2.64E-11 | NK cells | Clec4a3  |
| 1.95E-15 | 0.71736761 | 0.286 | 0.147 | 2.76E-11 | NK cells | Irak2    |
| 2.08E-15 | -0.9340062 | 0.278 | 0.481 | 2.95E-11 | NK cells | Serp1    |
| 2.09E-15 | -2.9078568 | 0.046 | 0.21  | 2.96E-11 | NK cells | C1qb     |
| 2.41E-15 | 0.61663435 | 0.162 | 0.06  | 3.41E-11 | NK cells | Abcb9    |
| 2.46E-15 | -1.3900593 | 0.011 | 0.165 | 3.48E-11 | NK cells | Tnfrsf4  |
| 2.61E-15 | -0.7413271 | 0     | 0.147 | 3.69E-11 | NK cells | Sirpa    |
| 2.67E-15 | -0.8395318 | 0.059 | 0.237 | 3.78E-11 | NK cells | Stap1    |
| 3.51E-15 | -0.6537505 | 0.092 | 0.283 | 4.97E-11 | NK cells | Mif4gd   |
| 3.55E-15 | -0.6270825 | 0.005 | 0.156 | 5.03E-11 | NK cells | Sgms1    |
| 4.07E-15 | -0.6391716 | 0.914 | 0.927 | 5.77E-11 | NK cells | Srgn     |
| 4.22E-15 | -0.7200661 | 0.014 | 0.168 | 5.97E-11 | NK cells | Ass1     |
| 4.36E-15 | 0.67708644 | 0.195 | 0.084 | 6.18E-11 | NK cells | Elmo2    |
| 4.75E-15 | 0.5864252  | 0.243 | 0.115 | 6.72E-11 | NK cells | Sla2     |
| 4.78E-15 | 0.51889133 | 0.776 | 0.638 | 6.76E-11 | NK cells | Myl12a   |
| 5.01E-15 | -0.7182451 | 0.643 | 0.75  | 7.09E-11 | NK cells | Ucp2     |
| 6.16E-15 | 0.52016594 | 0.314 | 0.158 | 8.72E-11 | NK cells | Tnfrsf9  |
| 6.41E-15 | 0.70090249 | 0.359 | 0.213 | 9.07E-11 | NK cells | Ift20    |
| 6.46E-15 | -0.543339  | 0.205 | 0.414 | 9.14E-11 | NK cells | Cmtm7    |
| 9.04E-15 | -0.3454537 | 0.919 | 0.936 | 1.28E-10 | NK cells | Rps9     |
| 9.69E-15 | -0.6089475 | 0.003 | 0.146 | 1.37E-10 | NK cells | BC028528 |
| 1.08E-14 | 0.59151898 | 0.251 | 0.124 | 1.54E-10 | NK cells | Sema4a   |
| 1.13E-14 | -0.9849562 | 0     | 0.141 | 1.60E-10 | NK cells | Tgm2     |
| 1.18E-14 | -0.7553522 | 0.003 | 0.145 | 1.67E-10 | NK cells | Cd300a   |
| 1.23E-14 | 0.41528536 | 0.135 | 0.046 | 1.74E-10 | NK cells | Sidt1    |
| 1.28E-14 | 0.57313456 | 0.276 | 0.142 | 1.81E-10 | NK cells | Azi2     |
| 1.31E-14 | 0.61490131 | 0.411 | 0.257 | 1.86E-10 | NK cells | Ptpn22   |
| 1.39E-14 | -0.7397562 | 0.003 | 0.144 | 1.96E-10 | NK cells | Slfn1    |
| 1.59E-14 | -1.547352  | 0.043 | 0.204 | 2.24E-10 | NK cells | Mt1      |
| 1.66E-14 | -0.7852184 | 0.184 | 0.388 | 2.36E-10 | NK cells | Gadd45b  |
| 1.84E-14 | 0.51820847 | 0.186 | 0.079 | 2.60E-10 | NK cells | Gsap     |
| 1.92E-14 | 0.70327077 | 0.286 | 0.149 | 2.72E-10 | NK cells | Atp2a3   |
| 2.11E-14 | 0.57143085 | 0.484 | 0.318 | 2.98E-10 | NK cells | Gimap3   |
| 2.21E-14 | 0.38935266 | 0.154 | 0.058 | 3.13E-10 | NK cells | Chn2     |
| 2.21E-14 | -0.6323211 | 0.008 | 0.152 | 3.14E-10 | NK cells | Il6ra    |
| 2.27E-14 | -0.6422687 | 0.414 | 0.601 | 3.21E-10 | NK cells | Gmfg     |
| 2.51E-14 | 0.36140312 | 0.138 | 0.048 | 3.55E-10 | NK cells | Sytl2    |
| 2.76E-14 | -0.8154335 | 0.132 | 0.325 | 3.90E-10 | NK cells | Hif1a    |
| 2.79E-14 | -0.7285043 | 0.046 | 0.209 | 3.95E-10 | NK cells | Rbpj     |
| 2.81E-14 | -1.5631531 | 0.005 | 0.146 | 3.98E-10 | NK cells | Tnfaip2  |
| 3.06E-14 | -1.5781827 | 0.405 | 0.539 | 4.33E-10 | NK cells | Psap     |

|          |            |       |       |          |          |          |
|----------|------------|-------|-------|----------|----------|----------|
| 3.22E-14 | -0.9953533 | 0.046 | 0.208 | 4.56E-10 | NK cells | Fcgr2b   |
| 3.23E-14 | -0.5387587 | 0.986 | 0.961 | 4.58E-10 | NK cells | mt-Co1   |
| 3.61E-14 | 0.63740591 | 0.238 | 0.115 | 5.10E-10 | NK cells | Nup210   |
| 4.53E-14 | -0.9698471 | 0     | 0.135 | 6.42E-10 | NK cells | Cd300ld  |
| 4.74E-14 | 0.49661067 | 0.168 | 0.066 | 6.71E-10 | NK cells | Clcf1    |
| 5.00E-14 | 0.52834119 | 0.678 | 0.558 | 7.08E-10 | NK cells | Tpm3     |
| 5.37E-14 | 0.62332275 | 0.235 | 0.114 | 7.61E-10 | NK cells | Gm4070   |
| 5.58E-14 | 0.40399236 | 0.178 | 0.072 | 7.90E-10 | NK cells | St3gal6  |
| 5.97E-14 | -0.6726606 | 0     | 0.134 | 8.45E-10 | NK cells | Cd6      |
| 6.65E-14 | -0.6283026 | 0.03  | 0.183 | 9.41E-10 | NK cells | Snx9     |
| 7.09E-14 | -2.4261917 | 0     | 0.133 | 1.00E-09 | NK cells | Slpi     |
| 7.17E-14 | -0.9525283 | 0.003 | 0.138 | 1.02E-09 | NK cells | Hmox1    |
| 7.86E-14 | -0.7342841 | 0     | 0.133 | 1.11E-09 | NK cells | Sirpb1c  |
| 8.25E-14 | -0.9627019 | 0.003 | 0.137 | 1.17E-09 | NK cells | Mgst1    |
| 9.32E-14 | 0.55817223 | 0.424 | 0.272 | 1.32E-09 | NK cells | Ppp1r12a |
| 9.70E-14 | -0.9696958 | 0.132 | 0.313 | 1.37E-09 | NK cells | Klf4     |
| 1.03E-13 | 0.56327323 | 0.219 | 0.103 | 1.46E-09 | NK cells | Ppp3cc   |
| 1.07E-13 | 0.50914728 | 0.316 | 0.173 | 1.51E-09 | NK cells | Acap1    |
| 1.47E-13 | -0.825609  | 0.014 | 0.152 | 2.08E-09 | NK cells | H2-Oa    |
| 1.54E-13 | -1.004815  | 0.003 | 0.135 | 2.18E-09 | NK cells | C5ar1    |
| 1.54E-13 | 0.75726372 | 0.405 | 0.27  | 2.19E-09 | NK cells | Ppig     |
| 1.59E-13 | -0.610678  | 0.008 | 0.144 | 2.25E-09 | NK cells | Rnase6   |
| 1.67E-13 | 0.50759468 | 0.654 | 0.505 | 2.37E-09 | NK cells | Cycc     |
| 1.71E-13 | 0.50875564 | 0.186 | 0.081 | 2.42E-09 | NK cells | Atp8b4   |
| 1.72E-13 | 0.35417608 | 0.897 | 0.84  | 2.44E-09 | NK cells | Serf2    |
| 1.73E-13 | -0.8312461 | 0     | 0.129 | 2.44E-09 | NK cells | Gda      |
| 1.73E-13 | 0.34518443 | 0.943 | 0.887 | 2.46E-09 | NK cells | Cfl1     |
| 2.34E-13 | 0.5384259  | 0.308 | 0.174 | 3.31E-09 | NK cells | Btg3     |
| 2.37E-13 | -0.7083946 | 0.219 | 0.41  | 3.36E-09 | NK cells | Slfn2    |
| 2.51E-13 | -0.6891208 | 0.003 | 0.133 | 3.55E-09 | NK cells | Nfam1    |
| 2.58E-13 | 0.44054505 | 0.178 | 0.076 | 3.65E-09 | NK cells | Chsy1    |
| 2.61E-13 | -1.1342825 | 0.481 | 0.624 | 3.70E-09 | NK cells | Zfp36    |
| 2.84E-13 | -0.7241876 | 0.008 | 0.141 | 4.02E-09 | NK cells | Ms4a6d   |
| 2.86E-13 | -0.7561387 | 0.146 | 0.331 | 4.05E-09 | NK cells | Rilpl2   |
| 3.14E-13 | 0.43658284 | 0.138 | 0.051 | 4.44E-09 | NK cells | Gramd4   |
| 3.19E-13 | -0.6142939 | 0     | 0.127 | 4.51E-09 | NK cells | Clec4a1  |
| 3.33E-13 | 0.62473825 | 0.538 | 0.362 | 4.71E-09 | NK cells | Rgs1     |
| 3.59E-13 | -1.7038542 | 0.014 | 0.148 | 5.08E-09 | NK cells | Cxcl9    |
| 3.93E-13 | 0.48101519 | 0.614 | 0.464 | 5.57E-09 | NK cells | Prkar1a  |
| 4.07E-13 | -1.5456303 | 0.003 | 0.131 | 5.76E-09 | NK cells | Trem1    |
| 4.55E-13 | -1.2702856 | 0.005 | 0.135 | 6.44E-09 | NK cells | Clec4e   |
| 5.01E-13 | -0.6305124 | 0.119 | 0.297 | 7.09E-09 | NK cells | Gch1     |
| 5.43E-13 | -5.4538716 | 0.024 | 0.161 | 7.68E-09 | NK cells | S100a8   |
| 5.75E-13 | -0.7605819 | 0.559 | 0.668 | 8.13E-09 | NK cells | Atp6v0c  |
| 5.93E-13 | -0.9017167 | 0.016 | 0.151 | 8.40E-09 | NK cells | Bank1    |
| 6.07E-13 | -1.367907  | 0.162 | 0.332 | 8.59E-09 | NK cells | Atf3     |
| 6.37E-13 | -0.6420152 | 0.016 | 0.152 | 9.02E-09 | NK cells | Sh3bp5   |
| 7.19E-13 | -0.6591189 | 0     | 0.123 | 1.02E-08 | NK cells | Csf2rb   |

|          |            |       |       |          |          |          |
|----------|------------|-------|-------|----------|----------|----------|
| 7.21E-13 | 0.51295059 | 0.349 | 0.205 | 1.02E-08 | NK cells | 6-Sep    |
| 7.46E-13 | 0.50215925 | 0.224 | 0.11  | 1.06E-08 | NK cells | Plscr1   |
| 7.56E-13 | -0.735818  | 0.008 | 0.136 | 1.07E-08 | NK cells | Blnk     |
| 7.94E-13 | 0.45129791 | 0.157 | 0.064 | 1.12E-08 | NK cells | Mmgt2    |
| 8.34E-13 | 0.63449159 | 0.278 | 0.154 | 1.18E-08 | NK cells | Snx18    |
| 8.41E-13 | 0.41633919 | 0.927 | 0.841 | 1.19E-08 | NK cells | Sh3bgrl3 |
| 8.41E-13 | 0.63838893 | 0.184 | 0.081 | 1.19E-08 | NK cells | Bambi    |
| 8.80E-13 | -0.2972754 | 0     | 0.123 | 1.25E-08 | NK cells | 1-Mar    |
| 9.18E-13 | -0.6088578 | 0.03  | 0.171 | 1.30E-08 | NK cells | Blvrb    |
| 1.05E-12 | 0.46830833 | 0.276 | 0.144 | 1.49E-08 | NK cells | S1pr4    |
| 1.21E-12 | -0.6982308 | 0.186 | 0.365 | 1.71E-08 | NK cells | Ms4a6b   |
| 1.23E-12 | -0.7216984 | 0     | 0.121 | 1.75E-08 | NK cells | Pilra    |
| 1.31E-12 | -1.881737  | 0.003 | 0.125 | 1.86E-08 | NK cells | Il1r2    |
| 1.37E-12 | -0.6242296 | 0.035 | 0.178 | 1.95E-08 | NK cells | Irf5     |
| 1.38E-12 | -0.6516167 | 0.008 | 0.136 | 1.96E-08 | NK cells | Izumo1r  |
| 1.40E-12 | 0.52966201 | 0.168 | 0.072 | 1.99E-08 | NK cells | Tmcc3    |
| 1.76E-12 | 0.4206456  | 0.108 | 0.036 | 2.49E-08 | NK cells | F2r      |
| 1.77E-12 | 0.34364232 | 0.1   | 0.032 | 2.51E-08 | NK cells | Acss2    |
| 1.80E-12 | -0.6094764 | 0.003 | 0.124 | 2.54E-08 | NK cells | Fcgr1    |
| 1.84E-12 | 0.48810603 | 0.808 | 0.725 | 2.60E-08 | NK cells | Shisa5   |
| 1.93E-12 | 0.44653563 | 0.132 | 0.05  | 2.73E-08 | NK cells | Sh2d1b1  |
| 1.95E-12 | -0.7345811 | 0.086 | 0.249 | 2.75E-08 | NK cells | Nrros    |
| 2.01E-12 | 0.26964277 | 0.959 | 0.905 | 2.85E-08 | NK cells | Ppia     |
| 2.18E-12 | -0.9237592 | 0.014 | 0.142 | 3.08E-08 | NK cells | Adam8    |
| 2.21E-12 | -0.8863892 | 0.041 | 0.183 | 3.13E-08 | NK cells | Id3      |
| 2.26E-12 | 0.5025645  | 0.711 | 0.555 | 3.19E-08 | NK cells | Emp3     |
| 2.26E-12 | -0.9790752 | 0     | 0.119 | 3.19E-08 | NK cells | Ifitm6   |
| 2.45E-12 | -0.5672468 | 0.014 | 0.142 | 3.46E-08 | NK cells | Apobec1  |
| 2.51E-12 | 0.54752403 | 0.195 | 0.092 | 3.55E-08 | NK cells | Cdk2ap1  |
| 2.62E-12 | -1.0953586 | 0.089 | 0.241 | 3.71E-08 | NK cells | Mef2c    |
| 2.62E-12 | 1.01524286 | 0.338 | 0.203 | 3.71E-08 | NK cells | Ly6c2    |
| 2.77E-12 | -0.5381477 | 0.124 | 0.298 | 3.92E-08 | NK cells | Acp5     |
| 2.93E-12 | 0.73593704 | 0.373 | 0.246 | 4.14E-08 | NK cells | Tpst2    |
| 3.00E-12 | -0.5426512 | 0.003 | 0.122 | 4.25E-08 | NK cells | Cd40     |
| 3.03E-12 | -0.8960311 | 0.065 | 0.22  | 4.28E-08 | NK cells | Cxcr6    |
| 3.06E-12 | -0.4934495 | 0.019 | 0.15  | 4.34E-08 | NK cells | Plekho1  |
| 3.13E-12 | 0.59199567 | 0.597 | 0.448 | 4.43E-08 | NK cells | Adgre5   |
| 3.13E-12 | 0.48394968 | 0.657 | 0.516 | 4.43E-08 | NK cells | Reep5    |
| 3.24E-12 | -0.9331196 | 0.005 | 0.126 | 4.59E-08 | NK cells | Mzb1     |
| 3.69E-12 | 0.53615562 | 0.227 | 0.114 | 5.23E-08 | NK cells | Spata13  |
| 3.98E-12 | -1.7661801 | 0     | 0.116 | 5.64E-08 | NK cells | Ifitm1   |
| 4.08E-12 | -0.7734529 | 0.011 | 0.135 | 5.77E-08 | NK cells | Cxcl16   |
| 4.21E-12 | 0.6687925  | 0.384 | 0.25  | 5.95E-08 | NK cells | Wipf1    |
| 4.42E-12 | 0.55889437 | 0.143 | 0.058 | 6.26E-08 | NK cells | Tnik     |
| 4.57E-12 | 0.75384029 | 0.386 | 0.251 | 6.48E-08 | NK cells | Neur13   |
| 4.70E-12 | 0.52248575 | 0.543 | 0.402 | 6.65E-08 | NK cells | Anp32b   |
| 4.99E-12 | -0.6419397 | 0.008 | 0.13  | 7.06E-08 | NK cells | Slc11a1  |
| 5.02E-12 | 0.32726267 | 0.886 | 0.776 | 7.11E-08 | NK cells | Arpc1b   |

|          |            |       |       |          |          |             |
|----------|------------|-------|-------|----------|----------|-------------|
| 5.14E-12 | -0.6544355 | 0.003 | 0.12  | 7.27E-08 | NK cells | Slc15a3     |
| 5.20E-12 | -0.6739046 | 0     | 0.115 | 7.36E-08 | NK cells | Nupr1       |
| 5.56E-12 | -0.4983528 | 0     | 0.115 | 7.87E-08 | NK cells | Pid1        |
| 6.01E-12 | 0.47850552 | 0.743 | 0.642 | 8.51E-08 | NK cells | Ptpn18      |
| 6.77E-12 | -0.5029248 | 0.032 | 0.169 | 9.58E-08 | NK cells | Ap1s2       |
| 6.84E-12 | 0.52861719 | 0.511 | 0.365 | 9.68E-08 | NK cells | Dennd4a     |
| 7.35E-12 | -0.719882  | 0.073 | 0.223 | 1.04E-07 | NK cells | Trim25      |
| 7.78E-12 | 0.58402923 | 0.176 | 0.08  | 1.10E-07 | NK cells | Abcb1b      |
| 8.12E-12 | 0.66329792 | 0.305 | 0.185 | 1.15E-07 | NK cells | Fyn         |
| 8.28E-12 | -1.2096392 | 0     | 0.113 | 1.17E-07 | NK cells | Csf3r       |
| 9.19E-12 | -0.4569424 | 0.008 | 0.128 | 1.30E-07 | NK cells | P2rx4       |
| 9.29E-12 | -0.9058299 | 0.014 | 0.136 | 1.31E-07 | NK cells | Fcer2a      |
| 9.42E-12 | -0.7379338 | 0.222 | 0.398 | 1.33E-07 | NK cells | S100a4      |
| 1.01E-11 | -0.6708582 | 0.151 | 0.322 | 1.43E-07 | NK cells | Snx20       |
| 1.08E-11 | -0.8332353 | 0.008 | 0.125 | 1.53E-07 | NK cells | Blk         |
| 1.19E-11 | -0.5865412 | 0.019 | 0.144 | 1.68E-07 | NK cells | Chchd10     |
| 1.31E-11 | -0.9508339 | 0.003 | 0.116 | 1.85E-07 | NK cells | Nlrp3       |
| 1.53E-11 | -0.7554283 | 0.189 | 0.348 | 2.17E-07 | NK cells | Lyn         |
| 1.57E-11 | 0.48500109 | 0.608 | 0.485 | 2.23E-07 | NK cells | Ndufb11     |
| 1.61E-11 | 0.56336636 | 0.435 | 0.308 | 2.28E-07 | NK cells | Bin2        |
| 1.62E-11 | -0.6389909 | 0.284 | 0.446 | 2.30E-07 | NK cells | Erp29       |
| 1.63E-11 | 0.51240745 | 0.568 | 0.432 | 2.31E-07 | NK cells | Krtcap2     |
| 1.70E-11 | -0.4588603 | 0.011 | 0.13  | 2.40E-07 | NK cells | Ube2l6      |
| 1.83E-11 | -0.6700164 | 0.024 | 0.151 | 2.59E-07 | NK cells | Rasgef1b    |
| 1.84E-11 | 0.59787651 | 0.457 | 0.331 | 2.61E-07 | NK cells | Dpm3        |
| 1.88E-11 | 0.53546367 | 0.165 | 0.074 | 2.65E-07 | NK cells | Nt5c3       |
| 1.89E-11 | 0.40505113 | 0.784 | 0.661 | 2.68E-07 | NK cells | Tmbim6      |
| 1.90E-11 | 0.55774403 | 0.289 | 0.167 | 2.69E-07 | NK cells | Tm6sf1      |
| 2.15E-11 | 0.42276579 | 0.535 | 0.395 | 3.04E-07 | NK cells | S100a13     |
| 2.26E-11 | 0.61521309 | 0.403 | 0.272 | 3.19E-07 | NK cells | Dnajc15     |
| 2.39E-11 | -1.1365533 | 0     | 0.109 | 3.38E-07 | NK cells | Clec4d      |
| 2.53E-11 | 0.44166653 | 0.141 | 0.058 | 3.58E-07 | NK cells | Gstm1       |
| 2.79E-11 | -0.4388028 | 0.986 | 0.947 | 3.95E-07 | NK cells | mt-Co2      |
| 2.81E-11 | -0.6813018 | 0.005 | 0.118 | 3.98E-07 | NK cells | Tnf         |
| 2.89E-11 | 0.55500946 | 0.805 | 0.688 | 4.10E-07 | NK cells | Dnaja1      |
| 2.92E-11 | 0.49688773 | 0.465 | 0.33  | 4.13E-07 | NK cells | 1810058I24R |
| 2.98E-11 | -1.0528786 | 0.003 | 0.112 | 4.22E-07 | NK cells | Ccl2        |
| 2.99E-11 | -0.6882424 | 0.049 | 0.186 | 4.23E-07 | NK cells | Rtp4        |
| 3.06E-11 | 0.54064597 | 0.227 | 0.116 | 4.33E-07 | NK cells | Gimap8      |
| 3.33E-11 | 0.31966709 | 0.105 | 0.037 | 4.72E-07 | NK cells | Gm14029     |
| 3.65E-11 | -0.8633698 | 0.07  | 0.21  | 5.17E-07 | NK cells | S1pr1       |
| 3.74E-11 | -0.5491427 | 0.073 | 0.22  | 5.29E-07 | NK cells | Znhit1      |
| 3.91E-11 | -0.4365481 | 0.003 | 0.112 | 5.54E-07 | NK cells | Fcgrt       |
| 3.93E-11 | 0.47753528 | 0.265 | 0.147 | 5.56E-07 | NK cells | Pitpnc1     |
| 4.10E-11 | -0.9912613 | 0.035 | 0.165 | 5.81E-07 | NK cells | Ccl2        |
| 4.10E-11 | 0.52086394 | 0.305 | 0.179 | 5.81E-07 | NK cells | Amd1        |
| 4.26E-11 | -0.6025685 | 0.003 | 0.111 | 6.03E-07 | NK cells | Lrp1        |
| 4.41E-11 | -0.5173798 | 0.138 | 0.305 | 6.25E-07 | NK cells | Pold4       |

|          |            |       |       |          |          |          |
|----------|------------|-------|-------|----------|----------|----------|
| 4.62E-11 | -1.0002144 | 0.4   | 0.536 | 6.54E-07 | NK cells | Sat1     |
| 5.10E-11 | -0.6244658 | 0.005 | 0.115 | 7.22E-07 | NK cells | Irf4     |
| 5.12E-11 | -0.6454818 | 0.095 | 0.245 | 7.25E-07 | NK cells | Prkcd    |
| 5.32E-11 | 0.52594881 | 0.214 | 0.111 | 7.53E-07 | NK cells | Pik3r5   |
| 6.08E-11 | -0.5061183 | 0.003 | 0.11  | 8.61E-07 | NK cells | Bcl11b   |
| 6.24E-11 | -0.8543392 | 0.003 | 0.109 | 8.83E-07 | NK cells | Ly6i     |
| 6.56E-11 | -0.5607374 | 0.003 | 0.109 | 9.29E-07 | NK cells | Tlr2     |
| 6.87E-11 | 0.45337995 | 0.143 | 0.061 | 9.72E-07 | NK cells | Golm1    |
| 7.48E-11 | -0.6254546 | 0.068 | 0.208 | 1.06E-06 | NK cells | Aldh2    |
| 7.76E-11 | 0.47963035 | 0.362 | 0.23  | 1.10E-06 | NK cells | Nfil3    |
| 7.77E-11 | -0.432597  | 0     | 0.104 | 1.10E-06 | NK cells | Cd180    |
| 8.49E-11 | -0.5515594 | 0.008 | 0.119 | 1.20E-06 | NK cells | Basp1    |
| 9.30E-11 | -0.6560199 | 0.014 | 0.126 | 1.32E-06 | NK cells | Ms4a4a   |
| 9.57E-11 | -0.5749682 | 0.005 | 0.112 | 1.36E-06 | NK cells | Cfp      |
| 1.06E-10 | 0.44531209 | 0.284 | 0.168 | 1.51E-06 | NK cells | Pfkp     |
| 1.12E-10 | 0.43814785 | 0.714 | 0.63  | 1.58E-06 | NK cells | Cnbp     |
| 1.12E-10 | -0.6357048 | 0.068 | 0.205 | 1.59E-06 | NK cells | Pmaip1   |
| 1.15E-10 | -0.4974022 | 0     | 0.102 | 1.63E-06 | NK cells | Igsf6    |
| 1.16E-10 | -0.621466  | 0.589 | 0.673 | 1.64E-06 | NK cells | Aldoa    |
| 1.19E-10 | -0.4907321 | 0     | 0.102 | 1.68E-06 | NK cells | Klra2    |
| 1.31E-10 | 0.35025822 | 0.146 | 0.063 | 1.85E-06 | NK cells | Ak3      |
| 1.32E-10 | -0.7151047 | 0.532 | 0.605 | 1.87E-06 | NK cells | Npc2     |
| 1.35E-10 | -0.5299908 | 0.008 | 0.116 | 1.91E-06 | NK cells | Ifi204   |
| 1.35E-10 | 0.4380532  | 0.724 | 0.622 | 1.92E-06 | NK cells | Atp5h    |
| 1.36E-10 | 0.47151751 | 0.132 | 0.055 | 1.93E-06 | NK cells | Vopp1    |
| 1.40E-10 | -0.7960075 | 0     | 0.101 | 1.98E-06 | NK cells | Il1rn    |
| 1.48E-10 | -0.696968  | 0.027 | 0.145 | 2.10E-06 | NK cells | Sdc4     |
| 1.51E-10 | -0.7300888 | 0.032 | 0.155 | 2.14E-06 | NK cells | Fabp5    |
| 1.57E-10 | 0.28547351 | 0.749 | 0.572 | 2.22E-06 | NK cells | Tspo     |
| 1.63E-10 | 0.41980325 | 0.962 | 0.914 | 2.31E-06 | NK cells | Cd52     |
| 1.64E-10 | -0.5748364 | 0.003 | 0.105 | 2.33E-06 | NK cells | Slamf9   |
| 1.65E-10 | -0.4017315 | 0.003 | 0.105 | 2.34E-06 | NK cells | Tmem106a |
| 1.70E-10 | -0.7713729 | 0.014 | 0.123 | 2.40E-06 | NK cells | Fcrla    |
| 1.78E-10 | 0.60151203 | 0.311 | 0.195 | 2.53E-06 | NK cells | Lat2     |
| 1.82E-10 | -0.5187575 | 0.035 | 0.159 | 2.58E-06 | NK cells | Inpp4b   |
| 1.83E-10 | -0.5771672 | 0.178 | 0.341 | 2.59E-06 | NK cells | Bst2     |
| 2.11E-10 | -0.3452561 | 1     | 0.998 | 2.98E-06 | NK cells | Gm42418  |
| 2.15E-10 | -0.5961635 | 0.011 | 0.118 | 3.04E-06 | NK cells | Actn1    |
| 2.18E-10 | -1.4340344 | 0.003 | 0.104 | 3.08E-06 | NK cells | Hdc      |
| 2.36E-10 | -1.0225124 | 0.132 | 0.275 | 3.34E-06 | NK cells | Icos     |
| 2.40E-10 | -0.5276957 | 0.011 | 0.117 | 3.39E-06 | NK cells | Cnn3     |
| 2.45E-10 | -0.4560674 | 0.008 | 0.113 | 3.47E-06 | NK cells | Fgd2     |
| 2.50E-10 | -0.3853778 | 0.003 | 0.103 | 3.54E-06 | NK cells | Bmyc     |
| 2.67E-10 | -0.9472977 | 0.424 | 0.543 | 3.78E-06 | NK cells | Taldo1   |
| 2.68E-10 | 0.54431652 | 0.516 | 0.395 | 3.79E-06 | NK cells | Mdh1     |
| 2.70E-10 | 0.55219641 | 0.365 | 0.244 | 3.82E-06 | NK cells | Prex1    |
| 2.73E-10 | 0.40594214 | 0.138 | 0.059 | 3.86E-06 | NK cells | Gramd1b  |
| 2.78E-10 | -5.6564131 | 0.051 | 0.172 | 3.94E-06 | NK cells | S100a9   |

|          |            |       |       |          |          |             |
|----------|------------|-------|-------|----------|----------|-------------|
| 2.84E-10 | 1.23540573 | 0.351 | 0.245 | 4.03E-06 | NK cells | Irf7        |
| 2.98E-10 | 0.46901887 | 0.576 | 0.454 | 4.22E-06 | NK cells | Gabarapl2   |
| 3.01E-10 | -2.3003172 | 0.003 | 0.102 | 4.25E-06 | NK cells | G0s2        |
| 3.47E-10 | 0.42453098 | 0.732 | 0.622 | 4.91E-06 | NK cells | Atp5d       |
| 3.79E-10 | 0.43989331 | 0.641 | 0.541 | 5.36E-06 | NK cells | Serbp1      |
| 4.00E-10 | -0.4238524 | 0.003 | 0.102 | 5.66E-06 | NK cells | Btk         |
| 4.08E-10 | 0.45058763 | 0.6   | 0.474 | 5.77E-06 | NK cells | Rnaset2a    |
| 4.08E-10 | -0.6784575 | 0.011 | 0.115 | 5.78E-06 | NK cells | Fam43a      |
| 4.67E-10 | -0.4504193 | 0.003 | 0.101 | 6.61E-06 | NK cells | Gm6377      |
| 5.06E-10 | -0.4830999 | 0.016 | 0.123 | 7.17E-06 | NK cells | Naaa        |
| 5.24E-10 | -0.4860306 | 0.046 | 0.17  | 7.41E-06 | NK cells | Agpat4      |
| 5.64E-10 | -0.3849638 | 0.016 | 0.124 | 7.98E-06 | NK cells | Cd2ap       |
| 5.80E-10 | 0.50811716 | 0.305 | 0.191 | 8.21E-06 | NK cells | Ubac2       |
| 6.49E-10 | 0.47402588 | 0.184 | 0.091 | 9.19E-06 | NK cells | Mical1      |
| 6.97E-10 | -0.4058726 | 0.989 | 0.946 | 9.87E-06 | NK cells | mt-Co3      |
| 7.12E-10 | -0.4650508 | 0.005 | 0.104 | 1.01E-05 | NK cells | Lpcat2      |
| 7.52E-10 | -0.5619917 | 0.008 | 0.108 | 1.07E-05 | NK cells | C3          |
| 7.63E-10 | 0.55012983 | 0.47  | 0.355 | 1.08E-05 | NK cells | Slc3a2      |
| 7.77E-10 | -0.487567  | 0.222 | 0.394 | 1.10E-05 | NK cells | Nap11l      |
| 8.05E-10 | 0.48507447 | 0.5   | 0.371 | 1.14E-05 | NK cells | Leprotl1    |
| 8.78E-10 | -0.295325  | 0.005 | 0.104 | 1.24E-05 | NK cells | Tspan31     |
| 8.85E-10 | 0.46667142 | 0.443 | 0.314 | 1.25E-05 | NK cells | Fosl2       |
| 8.93E-10 | -0.4508879 | 0.492 | 0.648 | 1.26E-05 | NK cells | Limd2       |
| 9.66E-10 | -0.3341854 | 0.051 | 0.179 | 1.37E-05 | NK cells | Susd3       |
| 9.81E-10 | -0.53234   | 0.957 | 0.919 | 1.39E-05 | NK cells | mt-Cytb     |
| 1.03E-09 | 0.57977332 | 0.295 | 0.184 | 1.46E-05 | NK cells | Pld3        |
| 1.08E-09 | 0.45307877 | 0.241 | 0.134 | 1.53E-05 | NK cells | Sh2d1a      |
| 1.13E-09 | 0.35207851 | 0.622 | 0.491 | 1.59E-05 | NK cells | Ppp1r18     |
| 1.14E-09 | 0.44795845 | 0.57  | 0.438 | 1.62E-05 | NK cells | Tubb4b      |
| 1.14E-09 | -3.2165476 | 0.005 | 0.101 | 1.62E-05 | NK cells | Retnlg      |
| 1.18E-09 | 0.46035784 | 0.459 | 0.338 | 1.67E-05 | NK cells | B4galnt1    |
| 1.27E-09 | -0.8269345 | 0.062 | 0.185 | 1.80E-05 | NK cells | Rnf149      |
| 1.31E-09 | 0.45946813 | 0.122 | 0.05  | 1.85E-05 | NK cells | Mgat5       |
| 1.33E-09 | -0.5921048 | 0.005 | 0.101 | 1.89E-05 | NK cells | Siglecg     |
| 1.35E-09 | 0.43038473 | 0.216 | 0.118 | 1.91E-05 | NK cells | 11-Sep      |
| 1.45E-09 | -0.5897601 | 0.011 | 0.11  | 2.06E-05 | NK cells | Pltp        |
| 1.46E-09 | -0.6968822 | 0.014 | 0.114 | 2.07E-05 | NK cells | Scd1        |
| 1.47E-09 | 0.40958842 | 0.565 | 0.439 | 2.08E-05 | NK cells | Tnfaip3     |
| 1.48E-09 | 0.46447153 | 0.208 | 0.111 | 2.09E-05 | NK cells | D1Erttd622e |
| 1.49E-09 | 0.31152813 | 0.416 | 0.274 | 2.11E-05 | NK cells | Fgl2        |
| 1.52E-09 | -0.534917  | 0.073 | 0.203 | 2.14E-05 | NK cells | Lamp2       |
| 1.54E-09 | -0.8206929 | 0.07  | 0.198 | 2.18E-05 | NK cells | Plk3        |
| 1.54E-09 | 0.40968459 | 0.181 | 0.093 | 2.18E-05 | NK cells | Ube2e3      |
| 1.56E-09 | 0.6875075  | 0.17  | 0.086 | 2.20E-05 | NK cells | Borcs7      |
| 1.79E-09 | 0.39038088 | 0.17  | 0.083 | 2.54E-05 | NK cells | Phf1        |
| 1.84E-09 | 0.3929753  | 0.638 | 0.512 | 2.61E-05 | NK cells | H2afj       |
| 1.87E-09 | 0.49369712 | 0.232 | 0.131 | 2.65E-05 | NK cells | Tecpr1      |
| 2.09E-09 | -0.3784954 | 0.135 | 0.282 | 2.96E-05 | NK cells | Ak2         |



|          |            |       |       |            |          |           |
|----------|------------|-------|-------|------------|----------|-----------|
| 2.11E-09 | 0.4703699  | 0.205 | 0.11  | 2.99E-05   | NK cells | Usp48     |
| 2.14E-09 | -0.5210039 | 0.062 | 0.188 | 3.03E-05   | NK cells | Eif4ebp1  |
| 2.16E-09 | -0.4439487 | 0.014 | 0.112 | 3.06E-05   | NK cells | Slamf6    |
| 2.25E-09 | 0.52930991 | 0.292 | 0.183 | 3.19E-05   | NK cells | Gnptg     |
| 2.41E-09 | -0.4980698 | 0.014 | 0.111 | 3.42E-05   | NK cells | Sdc3      |
| 2.66E-09 | -0.4095427 | 0.03  | 0.139 | 3.77E-05   | NK cells | Adam19    |
| 2.71E-09 | -0.6111566 | 0.159 | 0.301 | 3.83E-05   | NK cells | Anxa5     |
| 2.91E-09 | 0.52150893 | 0.305 | 0.193 | 4.11E-05   | NK cells | Acot7     |
| 3.16E-09 | -0.3677335 | 0.03  | 0.139 | 4.47E-05   | NK cells | Rftn1     |
| 3.65E-09 | 0.5046154  | 0.238 | 0.136 | 5.16E-05   | NK cells | Rin3      |
| 3.80E-09 | -0.7784457 | 0.049 | 0.164 | 5.38E-05   | NK cells | Gbp2      |
| 3.85E-09 | 0.51101205 | 0.643 | 0.558 | 5.45E-05   | NK cells | Rap1b     |
| 4.01E-09 | -0.4701274 | 0.057 | 0.178 | 5.68E-05   | NK cells | Gpr183    |
| 4.50E-09 | -0.4738335 | 0.178 | 0.331 | 6.37E-05   | NK cells | Ptpn6     |
| 4.69E-09 | -0.5856245 | 0.016 | 0.114 | 6.64E-05   | NK cells | Serpinb1a |
| 4.88E-09 | 0.5879705  | 0.362 | 0.255 | 6.90E-05   | NK cells | Tram1     |
| 4.89E-09 | 0.45394536 | 0.459 | 0.347 | 6.92E-05   | NK cells | Dock2     |
| 5.05E-09 | -0.5405045 | 0.214 | 0.364 | 7.14E-05   | NK cells | Aprt      |
| 5.19E-09 | 0.5238727  | 0.189 | 0.099 | 7.35E-05   | NK cells | Pim2      |
| 5.39E-09 | 0.3272541  | 0.141 | 0.065 | 7.63E-05   | NK cells | Scyl1     |
| 5.42E-09 | 0.51739993 | 0.357 | 0.243 | 7.67E-05   | NK cells | Mknk2     |
| 5.80E-09 | -0.5542421 | 0.141 | 0.28  | 8.22E-05   | NK cells | Hmgn1     |
| 5.81E-09 | 0.31703725 | 0.884 | 0.836 | 8.22E-05   | NK cells | Rpl10-ps3 |
| 5.89E-09 | -0.5519147 | 0.089 | 0.215 | 8.34E-05   | NK cells | Pkig      |
| 6.07E-09 | -0.3778604 | 0.97  | 0.898 | 8.60E-05   | NK cells | Rps20     |
| 6.34E-09 | -0.5289396 | 0.051 | 0.165 | 8.98E-05   | NK cells | Map4k2    |
| 6.68E-09 | -0.6678544 | 0.17  | 0.308 | 9.46E-05   | NK cells | Glrx      |
| 6.72E-09 | 0.54185808 | 0.268 | 0.161 | 9.52E-05   | NK cells | Rnf130    |
| 6.87E-09 | 0.55664716 | 0.165 | 0.082 | 9.72E-05   | NK cells | Cd160     |
| 6.95E-09 | -0.4181951 | 0.03  | 0.136 | 9.83E-05   | NK cells | Rnf19b    |
| 7.06E-09 | -0.3441906 | 0.011 | 0.103 | 9.99E-05   | NK cells | Sgk3      |
| 7.77E-09 | 0.44020176 | 0.476 | 0.356 | 0.00011004 | NK cells | Saraf     |
| 8.25E-09 | 0.52952196 | 0.254 | 0.154 | 0.00011673 | NK cells | Gatad2a   |
| 8.34E-09 | -0.6757396 | 0.105 | 0.232 | 0.000118   | NK cells | Dut       |
| 8.47E-09 | 0.51560358 | 0.235 | 0.139 | 0.00011992 | NK cells | Sike1     |
| 8.56E-09 | -0.4610023 | 0.427 | 0.582 | 0.00012116 | NK cells | Ypel3     |
| 8.87E-09 | -0.5575208 | 0.011 | 0.102 | 0.00012563 | NK cells | Snn       |
| 9.24E-09 | 0.48613147 | 0.289 | 0.187 | 0.0001308  | NK cells | Cers2     |
| 9.45E-09 | -0.4277392 | 0.019 | 0.115 | 0.00013384 | NK cells | Dck       |
| 9.57E-09 | -0.4275975 | 0.027 | 0.128 | 0.00013551 | NK cells | Arl5c     |
| 9.69E-09 | -0.3695709 | 0.019 | 0.116 | 0.00013712 | NK cells | Smco4     |
| 9.74E-09 | -0.3931375 | 0.141 | 0.286 | 0.00013786 | NK cells | Grb2      |
| 9.95E-09 | -0.8502193 | 0.078 | 0.192 | 0.00014086 | NK cells | Cd55      |
| 1.01E-08 | 0.42960125 | 0.17  | 0.088 | 0.00014364 | NK cells | Lrrk1     |
| 1.02E-08 | 0.55144202 | 0.319 | 0.213 | 0.00014387 | NK cells | Os9       |
| 1.15E-08 | 0.54897944 | 0.349 | 0.242 | 0.00016217 | NK cells | Ikzf1     |
| 1.15E-08 | 0.42689878 | 0.211 | 0.12  | 0.00016283 | NK cells | Vcpkmt    |
| 1.16E-08 | -0.5646064 | 0.019 | 0.114 | 0.00016355 | NK cells | Emilin2   |

|          |            |       |       |            |          |             |
|----------|------------|-------|-------|------------|----------|-------------|
| 1.20E-08 | 0.32419866 | 0.841 | 0.781 | 0.00016938 | NK cells | Cox8a       |
| 1.26E-08 | -0.3877019 | 0.027 | 0.127 | 0.00017839 | NK cells | Ptprj       |
| 1.29E-08 | 0.54480344 | 0.211 | 0.121 | 0.000182   | NK cells | Atp6v0a2    |
| 1.32E-08 | -0.529729  | 0.046 | 0.156 | 0.00018725 | NK cells | Myadm       |
| 1.41E-08 | -0.4422093 | 0.065 | 0.18  | 0.00020022 | NK cells | Bri3bp      |
| 1.44E-08 | -0.5071448 | 0.146 | 0.284 | 0.0002038  | NK cells | Tap1        |
| 1.47E-08 | -0.4401694 | 0.014 | 0.104 | 0.00020763 | NK cells | Gm15987     |
| 1.56E-08 | -0.535481  | 0.149 | 0.289 | 0.00022018 | NK cells | Smchd1      |
| 1.57E-08 | -0.2545778 | 0.011 | 0.1   | 0.00022248 | NK cells | Prdx4       |
| 1.58E-08 | -0.5430521 | 0.124 | 0.255 | 0.00022343 | NK cells | Sp140       |
| 1.62E-08 | -0.5488655 | 0.046 | 0.153 | 0.00022868 | NK cells | Isg20       |
| 1.62E-08 | -0.6679646 | 0.019 | 0.112 | 0.00022941 | NK cells | Cd300lf     |
| 1.68E-08 | -0.566859  | 0.343 | 0.478 | 0.00023812 | NK cells | Gdi2        |
| 1.72E-08 | -0.3885611 | 0.022 | 0.118 | 0.00024325 | NK cells | Ccl9        |
| 1.90E-08 | -0.5701019 | 0.051 | 0.16  | 0.00026835 | NK cells | Fbxl5       |
| 2.00E-08 | 0.44598932 | 0.495 | 0.385 | 0.0002826  | NK cells | Cd48        |
| 2.03E-08 | 0.30404584 | 0.865 | 0.802 | 0.00028695 | NK cells | Laptm5      |
| 2.09E-08 | -0.4664859 | 0.051 | 0.161 | 0.00029553 | NK cells | Trps1       |
| 2.15E-08 | 0.41387398 | 0.535 | 0.426 | 0.00030463 | NK cells | Plek        |
| 2.26E-08 | -0.9677622 | 0.127 | 0.253 | 0.00032058 | NK cells | Lmnb1       |
| 2.27E-08 | -0.3600694 | 0.165 | 0.314 | 0.00032167 | NK cells | Mrpl54      |
| 2.28E-08 | 0.28314574 | 0.735 | 0.628 | 0.00032246 | NK cells | Ppp1ca      |
| 2.47E-08 | 0.53636782 | 0.184 | 0.101 | 0.00034913 | NK cells | Scimp       |
| 2.52E-08 | -0.4952492 | 0.108 | 0.237 | 0.00035628 | NK cells | Smpdl3a     |
| 2.59E-08 | -0.7025892 | 0.054 | 0.161 | 0.00036601 | NK cells | Ctsl        |
| 2.88E-08 | -0.4748345 | 0.197 | 0.342 | 0.0004071  | NK cells | Irf2        |
| 2.88E-08 | 0.48040971 | 0.286 | 0.187 | 0.00040773 | NK cells | Rinl        |
| 3.12E-08 | 0.40442214 | 0.586 | 0.477 | 0.00044159 | NK cells | Arf1        |
| 3.19E-08 | -0.5670166 | 0.049 | 0.154 | 0.00045207 | NK cells | 2310001H17I |
| 3.20E-08 | -0.3085738 | 0.022 | 0.114 | 0.00045293 | NK cells | Pafah1b3    |
| 3.21E-08 | -0.551541  | 0.051 | 0.159 | 0.00045455 | NK cells | Ckb         |
| 3.33E-08 | 0.56579335 | 0.297 | 0.191 | 0.00047132 | NK cells | Sptbn1      |
| 3.46E-08 | -0.4612893 | 0.065 | 0.179 | 0.00049001 | NK cells | Uhrf2       |
| 3.60E-08 | 0.4406132  | 0.376 | 0.249 | 0.00050911 | NK cells | Tnfrsf18    |
| 3.72E-08 | -0.3993351 | 0.119 | 0.251 | 0.00052648 | NK cells | Hmox2       |
| 3.76E-08 | -0.3144077 | 0.062 | 0.176 | 0.00053261 | NK cells | Evi2a       |
| 3.82E-08 | 0.41188722 | 0.681 | 0.563 | 0.000541   | NK cells | Hsp90b1     |
| 3.97E-08 | 0.29963769 | 0.743 | 0.638 | 0.00056178 | NK cells | Sumo2       |
| 4.00E-08 | 0.42606699 | 0.186 | 0.102 | 0.00056685 | NK cells | Tinf2       |
| 4.06E-08 | 0.6479714  | 0.381 | 0.284 | 0.00057408 | NK cells | Slc9a3r1    |
| 4.08E-08 | -0.4259543 | 0.046 | 0.149 | 0.00057822 | NK cells | Map4k1      |
| 4.09E-08 | -0.3330884 | 0.062 | 0.174 | 0.00057927 | NK cells | Rnf213      |
| 4.10E-08 | 0.31664964 | 0.581 | 0.46  | 0.00058092 | NK cells | Tln1        |
| 4.17E-08 | 0.33182597 | 0.154 | 0.078 | 0.00058978 | NK cells | Camk2g      |
| 4.35E-08 | -0.3784694 | 0.049 | 0.154 | 0.000616   | NK cells | Lpxn        |
| 4.56E-08 | -0.9811646 | 0.397 | 0.487 | 0.00064617 | NK cells | Prdx5       |
| 4.68E-08 | -0.527949  | 0.154 | 0.286 | 0.00066193 | NK cells | Sh3kbp1     |
| 4.89E-08 | -0.464089  | 0.059 | 0.168 | 0.00069205 | NK cells | Sbno2       |

|          |            |       |       |            |          |          |
|----------|------------|-------|-------|------------|----------|----------|
| 5.07E-08 | -0.3800817 | 0.038 | 0.137 | 0.00071794 | NK cells | Myo1c    |
| 5.11E-08 | -0.693793  | 0.354 | 0.484 | 0.00072286 | NK cells | Pde4b    |
| 5.17E-08 | -0.4623035 | 0.03  | 0.124 | 0.00073159 | NK cells | Irgm1    |
| 5.19E-08 | 0.25394371 | 0.865 | 0.755 | 0.00073505 | NK cells | Cox4i1   |
| 5.34E-08 | -0.53703   | 0.022 | 0.112 | 0.00075637 | NK cells | Ccr8     |
| 5.70E-08 | -0.3482597 | 0.032 | 0.13  | 0.00080746 | NK cells | Tank     |
| 5.75E-08 | -0.6007334 | 0.054 | 0.157 | 0.00081463 | NK cells | Dmxl1    |
| 5.93E-08 | 0.6329728  | 0.311 | 0.214 | 0.00083887 | NK cells | Tmem30a  |
| 6.50E-08 | 0.43719539 | 0.473 | 0.37  | 0.00092049 | NK cells | Tmem234  |
| 6.58E-08 | 0.43959636 | 0.284 | 0.185 | 0.00093167 | NK cells | Myo1f    |
| 6.85E-08 | -0.4766021 | 0.046 | 0.146 | 0.0009694  | NK cells | Asah1    |
| 7.63E-08 | 0.46717884 | 0.13  | 0.062 | 0.00108052 | NK cells | Adamts10 |
| 7.82E-08 | -0.3472058 | 0.019 | 0.106 | 0.00110666 | NK cells | Rassf3   |
| 7.84E-08 | -0.6681404 | 0.078 | 0.188 | 0.00110999 | NK cells | Tox      |
| 7.99E-08 | 0.42583418 | 0.343 | 0.233 | 0.0011314  | NK cells | Tbc1d10c |
| 8.09E-08 | 0.47264182 | 0.238 | 0.145 | 0.00114584 | NK cells | Prkacb   |
| 8.28E-08 | 0.48276656 | 0.165 | 0.087 | 0.00117171 | NK cells | Dnajb4   |
| 8.78E-08 | -0.5112036 | 0.173 | 0.312 | 0.00124282 | NK cells | Gpcpd1   |
| 8.87E-08 | -0.6417321 | 0.211 | 0.333 | 0.00125591 | NK cells | Napsa    |
| 9.16E-08 | 0.45314589 | 0.522 | 0.414 | 0.00129676 | NK cells | Slc38a2  |
| 9.89E-08 | 0.34660261 | 0.616 | 0.469 | 0.00139986 | NK cells | Cd2      |
| 1.04E-07 | 0.2871789  | 0.111 | 0.049 | 0.00146905 | NK cells | Ptpn4    |
| 1.05E-07 | 0.48201121 | 0.224 | 0.136 | 0.00148663 | NK cells | Ttc39b   |
| 1.14E-07 | 0.45319098 | 0.127 | 0.061 | 0.00161046 | NK cells | Apobr    |
| 1.17E-07 | -0.5052745 | 0.368 | 0.492 | 0.00165894 | NK cells | Scand1   |
| 1.19E-07 | 0.37788016 | 0.53  | 0.405 | 0.00169018 | NK cells | Gimap6   |
| 1.24E-07 | 0.57458052 | 0.257 | 0.163 | 0.00176157 | NK cells | Suco     |
| 1.35E-07 | -0.3149415 | 0.022 | 0.108 | 0.00191741 | NK cells | Dnase2a  |
| 1.43E-07 | -0.3363106 | 0.092 | 0.211 | 0.00202142 | NK cells | Got1     |
| 1.48E-07 | -0.541902  | 0.038 | 0.13  | 0.00209077 | NK cells | Fgr      |
| 1.50E-07 | 0.46601339 | 0.254 | 0.159 | 0.00212919 | NK cells | Fryl     |
| 1.55E-07 | -0.4557177 | 0.019 | 0.103 | 0.00219157 | NK cells | Dusp16   |
| 1.55E-07 | 0.34747414 | 0.17  | 0.093 | 0.00219423 | NK cells | Lrrfip2  |
| 1.58E-07 | -0.4321499 | 0.103 | 0.221 | 0.00223692 | NK cells | Hexb     |
| 1.60E-07 | -0.4335693 | 0.054 | 0.154 | 0.00227083 | NK cells | Pxk      |
| 1.65E-07 | -0.6489536 | 0.397 | 0.534 | 0.00233428 | NK cells | Ppp1r15a |
| 1.65E-07 | 0.52962347 | 0.292 | 0.197 | 0.00233867 | NK cells | Evl      |
| 1.79E-07 | 0.4555089  | 0.273 | 0.176 | 0.00253815 | NK cells | Isca1    |
| 1.92E-07 | 0.37178089 | 0.192 | 0.108 | 0.00272496 | NK cells | Cpne3    |
| 1.95E-07 | -0.3953666 | 0.176 | 0.309 | 0.00276061 | NK cells | Slc25a4  |
| 1.99E-07 | 0.27188823 | 0.727 | 0.621 | 0.0028207  | NK cells | Capzb    |
| 2.09E-07 | -0.3344457 | 0.041 | 0.136 | 0.0029586  | NK cells | Soat1    |
| 2.14E-07 | -0.310708  | 0.059 | 0.162 | 0.00302259 | NK cells | Igtp     |
| 2.26E-07 | 0.44031366 | 0.173 | 0.097 | 0.00320627 | NK cells | Coro2a   |
| 2.27E-07 | -0.3618223 | 0.054 | 0.154 | 0.00320713 | NK cells | Scpep1   |
| 2.35E-07 | -0.3591412 | 0.019 | 0.102 | 0.00332933 | NK cells | Alcam    |
| 2.36E-07 | 0.46235283 | 0.192 | 0.113 | 0.00334003 | NK cells | Capn2    |
| 2.39E-07 | 0.38622572 | 0.138 | 0.07  | 0.00338364 | NK cells | Crot     |

|          |            |       |       |            |          |             |
|----------|------------|-------|-------|------------|----------|-------------|
| 2.53E-07 | -0.5930579 | 0.481 | 0.605 | 0.00357711 | NK cells | Nfkbia      |
| 2.57E-07 | -0.4929221 | 0.041 | 0.133 | 0.00363366 | NK cells | Maf         |
| 2.65E-07 | -0.2657603 | 0.046 | 0.142 | 0.00374466 | NK cells | Phyh        |
| 2.70E-07 | 0.3820517  | 0.416 | 0.307 | 0.00381639 | NK cells | Gimap1      |
| 2.74E-07 | -0.3643611 | 0.035 | 0.126 | 0.00388578 | NK cells | Cdk6        |
| 2.76E-07 | 0.57978648 | 0.327 | 0.227 | 0.00390714 | NK cells | Slamf7      |
| 2.94E-07 | 0.41138821 | 0.392 | 0.292 | 0.00415676 | NK cells | Pycard      |
| 3.16E-07 | -0.3384451 | 0.065 | 0.17  | 0.00447166 | NK cells | Slc6a6      |
| 3.39E-07 | 0.46797777 | 0.314 | 0.217 | 0.0047957  | NK cells | Tonsl       |
| 3.40E-07 | 0.47259915 | 0.546 | 0.443 | 0.00480601 | NK cells | Pdia3       |
| 3.59E-07 | -0.5998419 | 0.381 | 0.493 | 0.00508083 | NK cells | Mif         |
| 3.61E-07 | -0.3350627 | 0.114 | 0.231 | 0.00510383 | NK cells | Baz1a       |
| 3.67E-07 | -0.5093771 | 0.032 | 0.118 | 0.0051895  | NK cells | Fchs2       |
| 3.96E-07 | -0.731869  | 0.105 | 0.212 | 0.00560822 | NK cells | Plin2       |
| 4.02E-07 | 0.26043245 | 0.786 | 0.711 | 0.00569312 | NK cells | Cdc42       |
| 4.07E-07 | 0.50158179 | 0.208 | 0.128 | 0.00576212 | NK cells | Me2         |
| 4.19E-07 | 0.38709365 | 0.376 | 0.274 | 0.00593566 | NK cells | Cd82        |
| 4.31E-07 | -0.3158221 | 0.03  | 0.116 | 0.00609583 | NK cells | Tubb6       |
| 4.40E-07 | -0.3238078 | 0.843 | 0.863 | 0.00622957 | NK cells | Coro1a      |
| 4.43E-07 | 0.54509122 | 0.278 | 0.189 | 0.0062715  | NK cells | Lfng        |
| 4.69E-07 | -0.4537449 | 0.346 | 0.47  | 0.00664174 | NK cells | Atp6v0b     |
| 4.99E-07 | -0.6750422 | 0.246 | 0.367 | 0.0070706  | NK cells | Cstb        |
| 5.01E-07 | -0.4532273 | 0.181 | 0.311 | 0.00708618 | NK cells | Il10ra      |
| 5.03E-07 | 0.32433097 | 0.132 | 0.067 | 0.00711528 | NK cells | Arhgap18    |
| 5.27E-07 | 0.44475464 | 0.165 | 0.092 | 0.00745474 | NK cells | Galnt2      |
| 5.30E-07 | 0.48024912 | 0.335 | 0.243 | 0.00750428 | NK cells | Pdcd6ip     |
| 5.30E-07 | -0.4374864 | 0.065 | 0.164 | 0.00750535 | NK cells | Cndp2       |
| 5.42E-07 | -0.3929678 | 0.37  | 0.516 | 0.00767516 | NK cells | Akap13      |
| 5.56E-07 | 0.35600205 | 0.592 | 0.493 | 0.00787303 | NK cells | Tra2b       |
| 5.57E-07 | -0.5886133 | 0.097 | 0.203 | 0.00787947 | NK cells | Picalm      |
| 5.93E-07 | -0.308318  | 0.043 | 0.134 | 0.00839545 | NK cells | Hmgcl       |
| 5.94E-07 | 0.44735432 | 0.232 | 0.148 | 0.00841282 | NK cells | Ssr1        |
| 6.19E-07 | -1.0568727 | 0.027 | 0.108 | 0.00875901 | NK cells | Cxcl10      |
| 6.20E-07 | 0.35153897 | 0.595 | 0.504 | 0.00877764 | NK cells | Mbnl1       |
| 6.33E-07 | 0.45191168 | 0.165 | 0.092 | 0.00895993 | NK cells | Dbf4        |
| 6.54E-07 | 0.3733667  | 0.511 | 0.418 | 0.00926452 | NK cells | Ywhah       |
| 6.77E-07 | 0.3882968  | 0.162 | 0.089 | 0.00958803 | NK cells | Seps2       |
| 6.81E-07 | -0.5918436 | 0.214 | 0.333 | 0.00963681 | NK cells | Lamp1       |
| 6.92E-07 | 0.42245226 | 0.308 | 0.214 | 0.00979417 | NK cells | Runx1       |
| 7.00E-07 | -0.3133152 | 0.022 | 0.1   | 0.00991107 | NK cells | Nuak2       |
| 7.54E-07 | -0.3081593 | 0.038 | 0.125 | 0.01067995 | NK cells | Cyfip1      |
| 8.04E-07 | -0.4591057 | 0.035 | 0.117 | 0.0113859  | NK cells | Cfap43      |
| 8.11E-07 | -0.3047195 | 0.049 | 0.142 | 0.01148152 | NK cells | Itpr1       |
| 8.56E-07 | -0.4696631 | 0.324 | 0.438 | 0.01212405 | NK cells | Psmb9       |
| 8.72E-07 | 0.38719021 | 0.178 | 0.103 | 0.01233991 | NK cells | Ly9         |
| 8.93E-07 | 0.30578642 | 0.141 | 0.074 | 0.01264574 | NK cells | 1700047117R |
| 9.12E-07 | -0.6295461 | 0.27  | 0.384 | 0.01290801 | NK cells | Foxp1       |
| 9.46E-07 | 0.34417563 | 0.651 | 0.559 | 0.01339546 | NK cells | Ndufa3      |

|          |            |       |       |            |          |          |
|----------|------------|-------|-------|------------|----------|----------|
| 9.68E-07 | -0.5523744 | 0.119 | 0.227 | 0.0136986  | NK cells | Arhgap31 |
| 1.10E-06 | -0.5099343 | 0.03  | 0.108 | 0.01560059 | NK cells | B3gnt5   |
| 1.12E-06 | -0.3384201 | 0.062 | 0.157 | 0.01587221 | NK cells | Abi3     |
| 1.13E-06 | 0.26345288 | 0.732 | 0.632 | 0.01594347 | NK cells | Cox5b    |
| 1.15E-06 | 0.38172659 | 0.203 | 0.124 | 0.01632104 | NK cells | Prpf19   |
| 1.16E-06 | -0.935192  | 0.081 | 0.174 | 0.01637712 | NK cells | Gsr      |
| 1.18E-06 | -0.3508494 | 0.051 | 0.142 | 0.01674896 | NK cells | Gsto1    |
| 1.19E-06 | -0.4773618 | 0.057 | 0.148 | 0.01689349 | NK cells | Lyst     |
| 1.21E-06 | -0.2733238 | 0.03  | 0.111 | 0.01714901 | NK cells | Acer3    |
| 1.22E-06 | -0.4352617 | 0.054 | 0.143 | 0.01731664 | NK cells | Swap70   |
| 1.37E-06 | -0.2639377 | 0.908 | 0.864 | 0.01941935 | NK cells | Rpl35    |
| 1.40E-06 | 0.37460405 | 0.305 | 0.215 | 0.01975827 | NK cells | Gm9844   |
| 1.40E-06 | -0.4660592 | 0.186 | 0.309 | 0.01978027 | NK cells | Ncf4     |
| 1.41E-06 | -0.4390659 | 0.111 | 0.219 | 0.01990982 | NK cells | Plekho2  |
| 1.43E-06 | 0.32497812 | 0.146 | 0.078 | 0.0202402  | NK cells | Tatdn2   |
| 1.47E-06 | 0.4872829  | 0.414 | 0.332 | 0.02076999 | NK cells | Cuta     |
| 1.53E-06 | -0.3040878 | 0.054 | 0.146 | 0.02171605 | NK cells | Etv6     |
| 1.56E-06 | -0.296732  | 0.097 | 0.205 | 0.02212734 | NK cells | Mrpl14   |
| 1.57E-06 | -0.4055843 | 0.097 | 0.199 | 0.0222628  | NK cells | Cenpa    |
| 1.58E-06 | 0.30908871 | 0.146 | 0.079 | 0.02239509 | NK cells | Inpp1    |
| 1.59E-06 | -0.3938862 | 0.105 | 0.214 | 0.02244365 | NK cells | Uvrag    |
| 1.63E-06 | -0.4523212 | 0.159 | 0.28  | 0.02311018 | NK cells | Pdcd1    |
| 1.66E-06 | -0.537905  | 0.043 | 0.128 | 0.02343829 | NK cells | Gzmk     |
| 1.70E-06 | 0.46930972 | 0.251 | 0.171 | 0.02412319 | NK cells | Cmc1     |
| 1.75E-06 | -0.5108388 | 0.159 | 0.267 | 0.02471086 | NK cells | Syk      |
| 1.76E-06 | 0.45946849 | 0.289 | 0.204 | 0.02484663 | NK cells | Mxd4     |
| 1.80E-06 | -0.3570413 | 0.1   | 0.204 | 0.02542234 | NK cells | Cnp      |
| 1.83E-06 | -0.4760159 | 0.238 | 0.358 | 0.02587512 | NK cells | Ctsa     |
| 1.84E-06 | -0.4391882 | 0.116 | 0.224 | 0.02605056 | NK cells | Birc3    |
| 1.84E-06 | -0.3209138 | 0.054 | 0.143 | 0.02609809 | NK cells | Mpp1     |
| 1.86E-06 | -0.3656113 | 0.078 | 0.178 | 0.02639596 | NK cells | Hexa     |
| 1.88E-06 | 0.35721061 | 0.222 | 0.139 | 0.0266166  | NK cells | Arl2bp   |
| 1.99E-06 | 0.45886373 | 0.216 | 0.137 | 0.02810464 | NK cells | Flt3l    |
| 2.02E-06 | -0.3869684 | 0.068 | 0.162 | 0.02853878 | NK cells | Serpib6a |
| 2.02E-06 | 0.50435383 | 0.222 | 0.143 | 0.0285534  | NK cells | Otulin   |
| 2.02E-06 | 0.38660528 | 0.181 | 0.11  | 0.02861655 | NK cells | Pea15a   |
| 2.08E-06 | 0.39553124 | 0.341 | 0.244 | 0.02939767 | NK cells | Lbr      |
| 2.09E-06 | 0.41665295 | 0.246 | 0.162 | 0.02964454 | NK cells | Ccr5     |
| 2.10E-06 | -0.3862364 | 0.189 | 0.313 | 0.0296672  | NK cells | Smim14   |
| 2.10E-06 | 0.44565136 | 0.522 | 0.439 | 0.0297601  | NK cells | H2-Q4    |
| 2.13E-06 | 0.51424812 | 0.503 | 0.429 | 0.03008767 | NK cells | Arf6     |
| 2.19E-06 | -0.3047425 | 0.041 | 0.123 | 0.03096285 | NK cells | Slc43a2  |
| 2.26E-06 | -0.3481198 | 0.046 | 0.13  | 0.03196505 | NK cells | Mgst2    |
| 2.28E-06 | -0.6787571 | 0.13  | 0.238 | 0.03233822 | NK cells | Nfkbid   |
| 2.39E-06 | -0.5149713 | 0.027 | 0.101 | 0.03387114 | NK cells | AA467197 |
| 2.40E-06 | 0.34398654 | 0.678 | 0.576 | 0.03399962 | NK cells | Ndufa13  |
| 2.46E-06 | -0.6702535 | 0.043 | 0.124 | 0.03477001 | NK cells | Il7r     |
| 2.47E-06 | 0.45396911 | 0.154 | 0.088 | 0.03492328 | NK cells | Gnptab   |

|          |            |       |       |            |          |           |
|----------|------------|-------|-------|------------|----------|-----------|
| 2.49E-06 | -0.4527789 | 0.173 | 0.29  | 0.03518718 | NK cells | Il21r     |
| 2.51E-06 | -0.4435179 | 0.132 | 0.242 | 0.03547187 | NK cells | Vsir      |
| 2.55E-06 | -0.4773871 | 0.081 | 0.174 | 0.03609695 | NK cells | Ero1lb    |
| 2.56E-06 | -0.3591548 | 0.027 | 0.102 | 0.03627893 | NK cells | Rab20     |
| 2.57E-06 | -0.3070108 | 0.046 | 0.13  | 0.036369   | NK cells | Fam111a   |
| 2.58E-06 | 0.50421736 | 0.303 | 0.219 | 0.03646986 | NK cells | Tex261    |
| 2.66E-06 | -0.3385108 | 0.062 | 0.152 | 0.03765981 | NK cells | Map2k1    |
| 2.69E-06 | -0.4675349 | 0.368 | 0.463 | 0.03807939 | NK cells | Vamp8     |
| 2.77E-06 | 0.41276129 | 0.37  | 0.282 | 0.03922169 | NK cells | Hypk      |
| 2.80E-06 | -0.256883  | 0.943 | 0.897 | 0.0396911  | NK cells | Rps26     |
| 2.89E-06 | -0.4318883 | 0.138 | 0.25  | 0.04089362 | NK cells | Tiparp    |
| 3.05E-06 | 0.54416498 | 0.381 | 0.272 | 0.04318628 | NK cells | Sell      |
| 3.12E-06 | 0.25360711 | 0.176 | 0.101 | 0.04411737 | NK cells | Plcx2     |
| 3.14E-06 | 0.44501354 | 0.192 | 0.119 | 0.0444718  | NK cells | Sertad2   |
| 3.25E-06 | 0.319089   | 0.105 | 0.051 | 0.04594632 | NK cells | Prr5l     |
| 3.25E-06 | -0.462516  | 0.035 | 0.112 | 0.04599896 | NK cells | Gla       |
| 3.35E-06 | -0.6165681 | 0.535 | 0.623 | 0.04743568 | NK cells | Stk17b    |
| 3.36E-06 | 0.44672471 | 0.146 | 0.082 | 0.04753289 | NK cells | Rgs3      |
| 3.44E-06 | -0.2924995 | 0.046 | 0.13  | 0.04866367 | NK cells | Klk8      |
| 3.62E-06 | 0.48385439 | 0.181 | 0.11  | 0.05129585 | NK cells | Riok1     |
| 3.63E-06 | 0.45233195 | 0.184 | 0.111 | 0.05136475 | NK cells | Itgam     |
| 3.65E-06 | -0.3249737 | 0.097 | 0.198 | 0.05165057 | NK cells | Pip4k2a   |
| 3.65E-06 | -0.3552731 | 0.332 | 0.471 | 0.0516909  | NK cells | Hspa1a    |
| 3.69E-06 | 0.25945573 | 0.751 | 0.686 | 0.05226975 | NK cells | Hnrnpa2b1 |
| 3.71E-06 | -0.3218238 | 0.051 | 0.137 | 0.05252796 | NK cells | Nampt     |
| 3.82E-06 | 0.28104281 | 0.251 | 0.164 | 0.05402767 | NK cells | Zap70     |
| 3.84E-06 | 0.36747237 | 0.114 | 0.058 | 0.05436477 | NK cells | Aoah      |
| 3.94E-06 | 0.39501363 | 0.211 | 0.133 | 0.05575338 | NK cells | Rhof      |
| 4.13E-06 | -0.3990713 | 0.189 | 0.307 | 0.05852172 | NK cells | Rbm38     |
| 4.34E-06 | 0.41882143 | 0.922 | 0.871 | 0.06141379 | NK cells | Hspa8     |
| 4.39E-06 | 0.34843224 | 0.286 | 0.2   | 0.06216372 | NK cells | Dgat1     |
| 4.47E-06 | 0.36016724 | 0.178 | 0.108 | 0.06321316 | NK cells | Ube2g2    |
| 4.53E-06 | 0.4033117  | 0.422 | 0.34  | 0.06410292 | NK cells | Ociad1    |
| 4.77E-06 | -0.2824663 | 0.043 | 0.123 | 0.06757586 | NK cells | Vrk1      |
| 4.79E-06 | -0.3509906 | 0.081 | 0.177 | 0.06787044 | NK cells | AU020206  |
| 4.82E-06 | 0.31346309 | 0.138 | 0.076 | 0.06818438 | NK cells | Agtrap    |
| 4.87E-06 | 0.53260804 | 0.319 | 0.243 | 0.06900196 | NK cells | Lsm8      |
| 4.95E-06 | -0.3002367 | 0.046 | 0.127 | 0.07005189 | NK cells | Pmvk      |
| 5.11E-06 | 0.36636162 | 0.449 | 0.362 | 0.07227582 | NK cells | Atp1b3    |
| 5.26E-06 | 0.38157481 | 0.208 | 0.132 | 0.07447819 | NK cells | Vezf1     |
| 5.41E-06 | -0.5747933 | 0.378 | 0.467 | 0.07665257 | NK cells | Txn1      |
| 5.52E-06 | 0.27784396 | 0.646 | 0.535 | 0.07821169 | NK cells | Ostf1     |
| 5.66E-06 | -0.4242083 | 0.095 | 0.192 | 0.0801162  | NK cells | Trim30a   |
| 6.06E-06 | 0.39054881 | 0.378 | 0.29  | 0.08575812 | NK cells | Ankrd44   |
| 6.11E-06 | -0.3326057 | 0.046 | 0.126 | 0.08648287 | NK cells | Nsf       |
| 6.13E-06 | 0.37498284 | 0.743 | 0.633 | 0.0867387  | NK cells | Klf2      |
| 6.16E-06 | 0.33262335 | 0.157 | 0.091 | 0.08718875 | NK cells | St3gal4   |
| 6.23E-06 | -0.421151  | 0.032 | 0.105 | 0.08819542 | NK cells | Gadd45a   |

|          |            |       |       |            |          |          |
|----------|------------|-------|-------|------------|----------|----------|
| 6.28E-06 | -0.2677068 | 0.035 | 0.111 | 0.08896692 | NK cells | Mdfic    |
| 6.58E-06 | -0.6814228 | 0.919 | 0.929 | 0.09308569 | NK cells | Lars2    |
| 6.65E-06 | 0.34504198 | 0.33  | 0.239 | 0.09414879 | NK cells | Nfatc1   |
| 6.68E-06 | -0.2706466 | 0.035 | 0.111 | 0.09456176 | NK cells | Irf2bp2  |
| 6.74E-06 | 0.43241291 | 0.419 | 0.344 | 0.09546542 | NK cells | Cap1     |
| 6.88E-06 | -0.2847018 | 0.068 | 0.158 | 0.09737099 | NK cells | Larp4b   |
| 6.93E-06 | -0.2951439 | 0.062 | 0.148 | 0.09807094 | NK cells | Cd38     |
| 7.34E-06 | 0.33991434 | 0.47  | 0.382 | 0.10394125 | NK cells | Arf4     |
| 7.40E-06 | -0.375774  | 0.184 | 0.299 | 0.10470876 | NK cells | Tor1aip1 |
| 7.52E-06 | 0.33433816 | 0.349 | 0.258 | 0.10651311 | NK cells | Socs1    |
| 7.92E-06 | -0.4864513 | 0.181 | 0.294 | 0.11209948 | NK cells | Kdm6b    |
| 8.18E-06 | 0.33637126 | 0.116 | 0.061 | 0.11576398 | NK cells | Slc9a9   |
| 8.19E-06 | 0.32866632 | 0.143 | 0.08  | 0.1158693  | NK cells | Sult2b1  |
| 8.39E-06 | 0.27043786 | 0.114 | 0.059 | 0.11870286 | NK cells | Prkd3    |
| 8.66E-06 | -0.2874638 | 0.959 | 0.911 | 0.12258942 | NK cells | Rps15a   |
| 8.80E-06 | -0.3152148 | 0.043 | 0.12  | 0.12451671 | NK cells | Notch2   |
| 8.95E-06 | -0.3159507 | 0.081 | 0.171 | 0.12666748 | NK cells | Fam3c    |
| 9.22E-06 | 0.39145413 | 0.446 | 0.36  | 0.13056908 | NK cells | Stk24    |
| 1.04E-05 | -0.62185   | 0.073 | 0.158 | 0.14692326 | NK cells | Plk2     |
| 1.04E-05 | 0.37841009 | 0.314 | 0.227 | 0.14788572 | NK cells | Gm26532  |
| 1.08E-05 | -0.3062796 | 0.043 | 0.12  | 0.1534106  | NK cells | Camk1d   |
| 1.10E-05 | -0.3616269 | 0.065 | 0.147 | 0.15541405 | NK cells | Parp1    |
| 1.11E-05 | 0.27379473 | 0.138 | 0.078 | 0.15747247 | NK cells | Cdk5rap3 |
| 1.16E-05 | -0.3867726 | 0.032 | 0.101 | 0.16391062 | NK cells | Cmah     |
| 1.16E-05 | -0.3010644 | 0.111 | 0.209 | 0.16440029 | NK cells | Ube2f    |
| 1.16E-05 | 0.42913821 | 0.295 | 0.216 | 0.1648413  | NK cells | Rsbn1l   |
| 1.20E-05 | 0.36506719 | 0.405 | 0.326 | 0.16975599 | NK cells | Cdc37    |
| 1.20E-05 | -0.3062362 | 0.159 | 0.27  | 0.17019956 | NK cells | Ywhag    |
| 1.29E-05 | 0.3982088  | 0.468 | 0.391 | 0.18316865 | NK cells | Bzw1     |
| 1.34E-05 | 0.33751694 | 0.389 | 0.307 | 0.19026278 | NK cells | Rnf187   |
| 1.38E-05 | -0.3090374 | 0.038 | 0.111 | 0.1958156  | NK cells | Tgtp2    |
| 1.39E-05 | 0.32748772 | 0.476 | 0.403 | 0.19613119 | NK cells | Skp1a    |
| 1.53E-05 | 0.46448097 | 0.338 | 0.26  | 0.21721033 | NK cells | Vgll4    |
| 1.64E-05 | -0.423854  | 0.035 | 0.103 | 0.23146342 | NK cells | Xylt1    |
| 1.64E-05 | 0.26807079 | 0.586 | 0.498 | 0.2326149  | NK cells | Abrac1   |
| 1.68E-05 | -0.3273937 | 0.143 | 0.245 | 0.2375764  | NK cells | Ikbkb    |
| 1.74E-05 | 0.34908024 | 0.181 | 0.112 | 0.24563376 | NK cells | Stim1    |
| 1.74E-05 | 0.43412118 | 0.392 | 0.319 | 0.24650882 | NK cells | Vasp     |
| 1.79E-05 | -0.4632191 | 0.311 | 0.427 | 0.25280513 | NK cells | Ccnl1    |
| 1.80E-05 | -0.456155  | 0.227 | 0.334 | 0.25419859 | NK cells | Pnp      |
| 1.88E-05 | 0.28320138 | 0.492 | 0.401 | 0.26616545 | NK cells | Capns1   |
| 1.88E-05 | 0.3893383  | 0.224 | 0.152 | 0.26634341 | NK cells | Gramd1a  |
| 1.94E-05 | 0.28482206 | 0.124 | 0.068 | 0.27492514 | NK cells | Sppl3    |
| 2.01E-05 | -0.3177772 | 0.035 | 0.104 | 0.28475998 | NK cells | Tmcc1    |
| 2.10E-05 | -0.4495224 | 0.068 | 0.146 | 0.29739542 | NK cells | Lair1    |
| 2.19E-05 | 0.30755078 | 0.384 | 0.303 | 0.31006673 | NK cells | Lrrfip1  |
| 2.28E-05 | 0.4016955  | 0.192 | 0.125 | 0.32230545 | NK cells | Gna15    |
| 2.29E-05 | 0.39531693 | 0.238 | 0.165 | 0.32366412 | NK cells | B4galt1  |

|          |            |       |       |            |          |          |
|----------|------------|-------|-------|------------|----------|----------|
| 2.41E-05 | 0.2540032  | 0.116 | 0.062 | 0.34176866 | NK cells | Eml3     |
| 2.50E-05 | -0.3579328 | 0.049 | 0.122 | 0.35433806 | NK cells | Filip1l  |
| 2.55E-05 | 0.26748651 | 0.646 | 0.575 | 0.36098465 | NK cells | Hnrnpa3  |
| 2.57E-05 | -0.3262708 | 0.068 | 0.147 | 0.36385228 | NK cells | Ncoa3    |
| 2.60E-05 | 0.43724186 | 0.314 | 0.237 | 0.36808122 | NK cells | Nptn     |
| 2.64E-05 | -0.3180327 | 0.57  | 0.639 | 0.37421075 | NK cells | Nme2     |
| 2.64E-05 | 0.32988811 | 0.33  | 0.251 | 0.37437778 | NK cells | Rab1b    |
| 2.67E-05 | 0.27742358 | 0.627 | 0.529 | 0.37736473 | NK cells | Ran      |
| 2.93E-05 | -0.2968503 | 0.257 | 0.376 | 0.41473928 | NK cells | Prdx2    |
| 2.96E-05 | -0.5495042 | 0.476 | 0.565 | 0.41853701 | NK cells | Zfp36l1  |
| 2.96E-05 | -0.3845294 | 0.173 | 0.274 | 0.41885926 | NK cells | Rasgrp2  |
| 3.03E-05 | 0.46065528 | 0.23  | 0.158 | 0.42909276 | NK cells | Sgk1     |
| 3.23E-05 | 0.35543297 | 0.5   | 0.415 | 0.45734134 | NK cells | Spcs1    |
| 3.23E-05 | -0.2924209 | 0.116 | 0.209 | 0.45737946 | NK cells | Dnajc9   |
| 3.41E-05 | 0.43571087 | 0.462 | 0.398 | 0.48231329 | NK cells | Ywhab    |
| 3.63E-05 | -0.7055853 | 0.292 | 0.362 | 0.5132155  | NK cells | Lat      |
| 3.63E-05 | 0.25424389 | 0.335 | 0.248 | 0.51455253 | NK cells | Zgpat    |
| 3.65E-05 | 0.41397426 | 0.376 | 0.309 | 0.51717996 | NK cells | Cript    |
| 3.78E-05 | -0.4728267 | 0.3   | 0.403 | 0.53520929 | NK cells | Atp6v1g1 |
| 4.27E-05 | -0.4256014 | 0.095 | 0.179 | 0.60516594 | NK cells | Itgav    |
| 4.38E-05 | 0.38647976 | 0.154 | 0.096 | 0.62062039 | NK cells | Dtnbp1   |
| 4.59E-05 | -0.4582218 | 0.184 | 0.279 | 0.64943474 | NK cells | Ddx6     |
| 4.70E-05 | -0.382064  | 0.143 | 0.239 | 0.66543715 | NK cells | Camk2d   |
| 4.73E-05 | -0.7344267 | 0.297 | 0.382 | 0.66927805 | NK cells | Ctsc     |
| 4.76E-05 | 0.34028935 | 0.468 | 0.402 | 0.67391919 | NK cells | Ndufa1   |
| 4.76E-05 | -0.4785926 | 0.13  | 0.219 | 0.67401126 | NK cells | Ninj1    |
| 4.82E-05 | -0.2776326 | 0.149 | 0.248 | 0.68161966 | NK cells | Batf     |
| 4.83E-05 | 0.38240358 | 0.149 | 0.091 | 0.68360114 | NK cells | Pacsin2  |
| 4.85E-05 | -0.3456515 | 0.089 | 0.172 | 0.68593363 | NK cells | Irf9     |
| 4.98E-05 | -0.3629163 | 0.362 | 0.477 | 0.70502596 | NK cells | Gpi1     |
| 5.16E-05 | 0.34558843 | 0.168 | 0.106 | 0.73074144 | NK cells | Chtf8    |
| 5.17E-05 | 0.30571422 | 0.597 | 0.534 | 0.73140191 | NK cells | Cox7a2   |
| 5.18E-05 | -0.3361322 | 0.297 | 0.412 | 0.73383161 | NK cells | Txnip    |
| 5.18E-05 | -0.325203  | 0.205 | 0.311 | 0.73392673 | NK cells | Mier1    |
| 5.32E-05 | -0.3916189 | 0.262 | 0.366 | 0.75252944 | NK cells | Atpif1   |
| 5.36E-05 | -0.257919  | 0.065 | 0.141 | 0.75928875 | NK cells | Abhd12   |
| 5.73E-05 | 0.31473513 | 0.17  | 0.109 | 0.81169854 | NK cells | Nck1     |
| 5.83E-05 | -0.2968424 | 0.07  | 0.148 | 0.82512551 | NK cells | Svil     |
| 5.88E-05 | 0.33754338 | 0.241 | 0.171 | 0.83224874 | NK cells | Il10rb   |
| 5.90E-05 | 0.40635953 | 0.224 | 0.153 | 0.83458029 | NK cells | Gpr18    |
| 6.09E-05 | 0.40154012 | 0.192 | 0.129 | 0.86181238 | NK cells | Cyb5r3   |
| 6.10E-05 | -0.3120138 | 0.154 | 0.25  | 0.86335648 | NK cells | Smap2    |
| 6.36E-05 | -0.305222  | 0.049 | 0.118 | 0.90012398 | NK cells | Fes      |
| 6.54E-05 | 0.29079287 | 0.222 | 0.148 | 0.92550397 | NK cells | Lamb3    |
| 6.61E-05 | 0.35356308 | 0.186 | 0.121 | 0.93608964 | NK cells | Ccdc117  |
| 6.98E-05 | -0.3879481 | 0.124 | 0.213 | 0.98759447 | NK cells | Creg1    |
| 7.08E-05 | -0.2530609 | 0.059 | 0.134 | 1          | NK cells | Hip1     |
| 7.09E-05 | -0.3365738 | 0.062 | 0.133 | 1          | NK cells | Nrm      |



|            |            |       |       |   |          |         |
|------------|------------|-------|-------|---|----------|---------|
| 7.11E-05   | -0.3224914 | 0.905 | 0.881 | 1 | NK cells | mt-Atp6 |
| 7.19E-05   | 0.32016885 | 0.459 | 0.396 | 1 | NK cells | Capza1  |
| 7.54E-05   | -0.3995659 | 0.211 | 0.305 | 1 | NK cells | Man2b1  |
| 7.64E-05   | -0.3044542 | 0.054 | 0.123 | 1 | NK cells | Pcf11   |
| 7.90E-05   | 0.47016242 | 0.189 | 0.126 | 1 | NK cells | Klhl6   |
| 8.08E-05   | 0.38257402 | 0.259 | 0.192 | 1 | NK cells | Lasp1   |
| 8.09E-05   | 0.32424814 | 0.468 | 0.404 | 1 | NK cells | Raly    |
| 8.10E-05   | -0.294439  | 0.17  | 0.27  | 1 | NK cells | Lbh     |
| 8.11E-05   | -0.6790404 | 0.157 | 0.232 | 1 | NK cells | Fcgr3   |
| 8.20E-05   | -0.2941147 | 0.086 | 0.166 | 1 | NK cells | Skap2   |
| 8.24E-05   | -0.4495234 | 0.238 | 0.34  | 1 | NK cells | Cited2  |
| 8.24E-05   | -0.4011906 | 0.173 | 0.264 | 1 | NK cells | Snx2    |
| 8.38E-05   | 0.31573139 | 0.481 | 0.412 | 1 | NK cells | Atp5k   |
| 8.60E-05   | -0.3274374 | 0.146 | 0.239 | 1 | NK cells | Rhoh    |
| 8.74E-05   | 0.33706402 | 0.492 | 0.419 | 1 | NK cells | Tbca    |
| 9.07E-05   | 0.29375584 | 0.197 | 0.13  | 1 | NK cells | Arap2   |
| 9.09E-05   | 0.39793806 | 0.222 | 0.155 | 1 | NK cells | Dnajc1  |
| 9.57E-05   | -0.2939653 | 0.168 | 0.266 | 1 | NK cells | Tgfb2   |
| 0.0001005  | -0.3012188 | 0.086 | 0.166 | 1 | NK cells | Entpd1  |
| 0.00010732 | -0.4650177 | 0.322 | 0.416 | 1 | NK cells | Tubb5   |
| 0.00010768 | -0.5705319 | 0.078 | 0.15  | 1 | NK cells | Dusp10  |
| 0.00011156 | -0.2851256 | 0.073 | 0.146 | 1 | NK cells | Egln2   |
| 0.00011318 | 0.30933285 | 0.227 | 0.162 | 1 | NK cells | Unc119  |
| 0.00011326 | 0.37412865 | 0.343 | 0.279 | 1 | NK cells | Ddost   |
| 0.00011407 | -0.3724601 | 0.116 | 0.197 | 1 | NK cells | Dgka    |
| 0.00011702 | -0.3884706 | 0.227 | 0.328 | 1 | NK cells | Gng2    |
| 0.00012274 | 0.39986219 | 0.481 | 0.429 | 1 | NK cells | Tgfb1   |
| 0.00012372 | -0.2930747 | 0.108 | 0.19  | 1 | NK cells | Pten    |
| 0.00012564 | 0.37101193 | 0.368 | 0.298 | 1 | NK cells | Rab8a   |
| 0.00013105 | 0.51478363 | 0.295 | 0.228 | 1 | NK cells | Atp11b  |
| 0.00013502 | -0.29902   | 0.051 | 0.116 | 1 | NK cells | Pml     |
| 0.00014064 | 0.31532714 | 0.286 | 0.218 | 1 | NK cells | Rnf138  |
| 0.00014301 | 0.42186983 | 0.322 | 0.254 | 1 | NK cells | Itgb7   |
| 0.00014317 | 0.28337207 | 0.149 | 0.094 | 1 | NK cells | Itpk1   |
| 0.00014389 | -0.4427726 | 0.238 | 0.326 | 1 | NK cells | Mrps6   |
| 0.00014502 | 0.42390123 | 0.408 | 0.349 | 1 | NK cells | Bcap31  |
| 0.00015191 | 0.4138597  | 0.259 | 0.195 | 1 | NK cells | Cetn2   |
| 0.00016309 | 0.38021184 | 0.273 | 0.206 | 1 | NK cells | Hopx    |
| 0.00016551 | 0.4393699  | 0.362 | 0.299 | 1 | NK cells | Ssr2    |
| 0.0001663  | -0.9383418 | 0.665 | 0.649 | 1 | NK cells | S100a11 |
| 0.0001705  | 0.35567555 | 0.151 | 0.097 | 1 | NK cells | Rap2b   |
| 0.00017459 | 0.38565191 | 0.335 | 0.272 | 1 | NK cells | Cmpk1   |
| 0.00018484 | 0.38334345 | 0.319 | 0.255 | 1 | NK cells | Glrx3   |
| 0.0001921  | -0.255318  | 0.119 | 0.201 | 1 | NK cells | Dynlt1b |
| 0.00019449 | 0.30195496 | 0.197 | 0.134 | 1 | NK cells | Cab39   |
| 0.00019537 | 0.27986102 | 0.132 | 0.082 | 1 | NK cells | Acadvl  |
| 0.00021144 | -0.9982206 | 0.286 | 0.389 | 1 | NK cells | Gm26917 |
| 0.00021351 | -0.2501925 | 0.119 | 0.2   | 1 | NK cells | Kdm7a   |

|            |            |       |       |            |          |
|------------|------------|-------|-------|------------|----------|
| 0.00021446 | -0.3201876 | 0.07  | 0.139 | 1 NK cells | Fem1c    |
| 0.00022142 | -0.2716467 | 0.068 | 0.136 | 1 NK cells | Map3k8   |
| 0.00022389 | 0.2667826  | 0.462 | 0.401 | 1 NK cells | Tmed9    |
| 0.00022576 | 0.25409968 | 0.357 | 0.289 | 1 NK cells | Card19   |
| 0.00022605 | 0.35353639 | 0.189 | 0.129 | 1 NK cells | Tle3     |
| 0.00022866 | 0.29966284 | 0.343 | 0.274 | 1 NK cells | Tnfrsf1b |
| 0.00023377 | 0.31130466 | 0.381 | 0.319 | 1 NK cells | Lgals9   |
| 0.00023509 | 0.425389   | 0.349 | 0.289 | 1 NK cells | Lrp10    |
| 0.00023741 | -0.3346601 | 0.595 | 0.667 | 1 NK cells | Klf6     |
| 0.00024104 | 0.32769939 | 0.195 | 0.136 | 1 NK cells | Mrpl9    |
| 0.00025212 | -0.3127302 | 0.162 | 0.251 | 1 NK cells | BC005537 |
| 0.00026376 | -0.257384  | 0.111 | 0.19  | 1 NK cells | Tmem219  |
| 0.0002727  | -0.2683873 | 0.046 | 0.105 | 1 NK cells | Cmtr1    |
| 0.00031244 | -0.2784984 | 0.059 | 0.123 | 1 NK cells | Bach1    |
| 0.00033357 | -0.2959929 | 0.127 | 0.207 | 1 NK cells | Ppt1     |
| 0.00034096 | 0.32753106 | 0.459 | 0.405 | 1 NK cells | Sumo1    |
| 0.00034116 | 0.41784893 | 0.219 | 0.16  | 1 NK cells | Lsm1     |
| 0.00034746 | 0.41502822 | 0.411 | 0.348 | 1 NK cells | Crem     |
| 0.0003488  | -0.2570106 | 0.068 | 0.132 | 1 NK cells | Neu1     |
| 0.00035672 | 0.35293873 | 0.227 | 0.169 | 1 NK cells | Polr2i   |
| 0.0003587  | -0.4642569 | 0.122 | 0.198 | 1 NK cells | Eea1     |
| 0.00035931 | 0.32538751 | 0.154 | 0.101 | 1 NK cells | Golga4   |
| 0.00037136 | -0.4360392 | 0.146 | 0.224 | 1 NK cells | Sorl1    |
| 0.00037231 | 0.35278808 | 0.2   | 0.142 | 1 NK cells | Chst12   |
| 0.00037387 | 0.35944466 | 0.295 | 0.23  | 1 NK cells | Psip1    |
| 0.000376   | 0.36100086 | 0.132 | 0.084 | 1 NK cells | Sfxn3    |
| 0.00037844 | -0.2787676 | 0.219 | 0.313 | 1 NK cells | Pgk1     |
| 0.00038316 | 0.39619458 | 0.395 | 0.332 | 1 NK cells | Ncor1    |
| 0.00039758 | -0.3000652 | 0.151 | 0.233 | 1 NK cells | Phf11b   |
| 0.00041544 | -0.3134608 | 0.176 | 0.263 | 1 NK cells | Wsb1     |
| 0.00043323 | -0.2776304 | 0.168 | 0.254 | 1 NK cells | Pstpip1  |
| 0.00044737 | 0.36151019 | 0.286 | 0.227 | 1 NK cells | Ube2j2   |
| 0.00044837 | 0.28797954 | 0.341 | 0.273 | 1 NK cells | Isy1     |
| 0.0004546  | 0.31414425 | 0.127 | 0.078 | 1 NK cells | Arhgef18 |
| 0.00047055 | 0.47871967 | 0.297 | 0.242 | 1 NK cells | Ppm1g    |
| 0.00048412 | 0.48749249 | 0.184 | 0.13  | 1 NK cells | Errfi1   |
| 0.00048831 | 0.29567301 | 0.116 | 0.07  | 1 NK cells | Gata3    |
| 0.00050113 | -0.3170957 | 0.165 | 0.245 | 1 NK cells | Smc4     |
| 0.00051087 | 0.25360635 | 0.116 | 0.071 | 1 NK cells | Sec23b   |
| 0.00051095 | 0.29232092 | 0.308 | 0.245 | 1 NK cells | Lsm5     |
| 0.00051287 | -0.5282889 | 0.486 | 0.536 | 1 NK cells | Pkm      |
| 0.00052642 | -0.9801468 | 0.232 | 0.304 | 1 NK cells | lsg15    |
| 0.0005452  | -0.2510065 | 0.057 | 0.115 | 1 NK cells | Rcc2     |
| 0.00055712 | -0.2738583 | 0.089 | 0.159 | 1 NK cells | P4ha1    |
| 0.00056545 | 0.27886361 | 0.141 | 0.091 | 1 NK cells | Alad     |
| 0.00056827 | 0.27060388 | 0.708 | 0.62  | 1 NK cells | Ppib     |
| 0.0005765  | -0.3355995 | 0.216 | 0.303 | 1 NK cells | Tgif1    |
| 0.00057728 | 0.28655222 | 0.203 | 0.144 | 1 NK cells | Ss18     |

|            |            |       |       |            |          |
|------------|------------|-------|-------|------------|----------|
| 0.00057903 | -0.349492  | 0.568 | 0.605 | 1 NK cells | Prdx1    |
| 0.00058166 | 0.27812674 | 0.168 | 0.113 | 1 NK cells | Ccng2    |
| 0.00058673 | -0.2654225 | 0.07  | 0.134 | 1 NK cells | Tmem176b |
| 0.0006141  | -0.2781144 | 0.051 | 0.107 | 1 NK cells | Prkd2    |
| 0.00062486 | 0.31112567 | 0.281 | 0.215 | 1 NK cells | Tob1     |
| 0.00062867 | 0.29005184 | 0.505 | 0.455 | 1 NK cells | Tmem258  |
| 0.00064775 | 0.30891486 | 0.1   | 0.059 | 1 NK cells | Wdr95    |
| 0.00065358 | 0.30233446 | 0.168 | 0.115 | 1 NK cells | Txndc11  |
| 0.00066069 | 0.3224928  | 0.127 | 0.081 | 1 NK cells | Nop9     |
| 0.00066278 | 0.38700799 | 0.446 | 0.402 | 1 NK cells | Tmed2    |
| 0.00067747 | 0.34777415 | 0.195 | 0.14  | 1 NK cells | Stt3a    |
| 0.00068098 | -0.4499122 | 0.154 | 0.229 | 1 NK cells | Tnfrsf1a |
| 0.00068386 | 0.4217529  | 0.27  | 0.211 | 1 NK cells | Tm9sf3   |
| 0.00069247 | 0.28833148 | 0.176 | 0.124 | 1 NK cells | Ptpn7    |
| 0.00069702 | -0.2709109 | 0.149 | 0.23  | 1 NK cells | Stk38    |
| 0.00070728 | 0.31409995 | 0.322 | 0.264 | 1 NK cells | Idh3b    |
| 0.00073494 | 0.34008418 | 0.286 | 0.225 | 1 NK cells | Odc1     |
| 0.00073669 | 0.33360655 | 0.103 | 0.062 | 1 NK cells | Ssh1     |
| 0.00076395 | 0.29130765 | 0.297 | 0.234 | 1 NK cells | Tgoln1   |
| 0.00078299 | 0.31929396 | 0.351 | 0.293 | 1 NK cells | M6pr     |
| 0.00080299 | -0.3512469 | 0.189 | 0.267 | 1 NK cells | Rnh1     |
| 0.00082244 | 0.2692477  | 0.473 | 0.419 | 1 NK cells | Hnrnp1   |
| 0.00082478 | 0.27667257 | 0.362 | 0.295 | 1 NK cells | Slc50a1  |
| 0.00083018 | -0.3465469 | 0.073 | 0.132 | 1 NK cells | Hvcn1    |
| 0.00083303 | -0.2911077 | 0.87  | 0.858 | 1 NK cells | Rpl17    |
| 0.00085401 | 0.31303898 | 0.416 | 0.359 | 1 NK cells | Polr2l   |
| 0.0008601  | 0.28706207 | 0.224 | 0.168 | 1 NK cells | Map4     |
| 0.00087279 | 0.26206931 | 0.551 | 0.496 | 1 NK cells | Eif4g2   |
| 0.00087948 | -0.3486438 | 0.684 | 0.696 | 1 NK cells | Psmb8    |
| 0.00090461 | 0.41254073 | 0.2   | 0.147 | 1 NK cells | Acly     |
| 0.00093152 | 0.29315847 | 0.178 | 0.127 | 1 NK cells | Arhgef2  |
| 0.00096536 | 0.38263442 | 0.197 | 0.144 | 1 NK cells | Ccdc88c  |
| 0.00097024 | 0.3210137  | 0.497 | 0.447 | 1 NK cells | Hnrnpab  |
| 0.00100153 | -0.38787   | 0.173 | 0.25  | 1 NK cells | Hilpda   |
| 0.00105127 | 0.41155141 | 0.214 | 0.162 | 1 NK cells | Ndfip2   |
| 0.00105687 | 0.39364183 | 0.708 | 0.647 | 1 NK cells | Hspa5    |
| 0.00115354 | -0.2539507 | 0.065 | 0.122 | 1 NK cells | Rgs16    |
| 0.00115699 | -0.2633294 | 0.162 | 0.241 | 1 NK cells | Per1     |
| 0.00118936 | 0.40792642 | 0.216 | 0.162 | 1 NK cells | Aplp2    |
| 0.00120905 | 0.27835303 | 0.276 | 0.214 | 1 NK cells | Rnf125   |
| 0.0012137  | -0.3473738 | 0.17  | 0.247 | 1 NK cells | Zbp1     |
| 0.00122227 | 0.36601082 | 0.378 | 0.325 | 1 NK cells | Sft2d1   |
| 0.00123087 | 0.32021129 | 0.154 | 0.106 | 1 NK cells | Slc35b2  |
| 0.00126538 | 0.26745243 | 0.211 | 0.156 | 1 NK cells | Ppil2    |
| 0.00127134 | 0.29329886 | 0.368 | 0.312 | 1 NK cells | Plekhj1  |
| 0.00127802 | 0.34872913 | 0.189 | 0.137 | 1 NK cells | Efr3a    |
| 0.00128447 | 0.28359967 | 0.219 | 0.161 | 1 NK cells | Kif21b   |
| 0.00129182 | -0.2878524 | 0.073 | 0.133 | 1 NK cells | Bag3     |

|            |            |       |       |            |           |
|------------|------------|-------|-------|------------|-----------|
| 0.00132509 | 0.28885036 | 0.565 | 0.524 | 1 NK cells | Hnrnpf    |
| 0.00134043 | 0.43468194 | 0.408 | 0.369 | 1 NK cells | Nme1      |
| 0.00134573 | 0.33111688 | 0.284 | 0.228 | 1 NK cells | Zeb2      |
| 0.00136959 | -0.3016615 | 0.265 | 0.349 | 1 NK cells | Zfand5    |
| 0.00137987 | -0.2677998 | 0.189 | 0.271 | 1 NK cells | Clic4     |
| 0.00138167 | -0.5159045 | 0.351 | 0.424 | 1 NK cells | Irf1      |
| 0.00140913 | -0.4885945 | 0.23  | 0.304 | 1 NK cells | Nfe2l2    |
| 0.00145927 | -0.25031   | 0.097 | 0.16  | 1 NK cells | Pias1     |
| 0.00149555 | -0.2704572 | 0.219 | 0.306 | 1 NK cells | Lamtor1   |
| 0.00156537 | 0.27813501 | 0.162 | 0.112 | 1 NK cells | Pdlim1    |
| 0.00167485 | 0.26181478 | 0.408 | 0.358 | 1 NK cells | 7-Sep     |
| 0.00170413 | 0.27382368 | 0.146 | 0.1   | 1 NK cells | Ppm1b     |
| 0.00175373 | 0.33699494 | 0.151 | 0.105 | 1 NK cells | Txnrd1    |
| 0.00176729 | 0.27815852 | 0.159 | 0.11  | 1 NK cells | Jakmip1   |
| 0.00178015 | -0.2850609 | 0.327 | 0.42  | 1 NK cells | Rps27rt   |
| 0.00178533 | 0.28180005 | 0.403 | 0.351 | 1 NK cells | Rbm42     |
| 0.00180708 | -0.3230234 | 0.07  | 0.122 | 1 NK cells | Eif2ak3   |
| 0.001864   | 0.2647946  | 0.362 | 0.304 | 1 NK cells | Mob4      |
| 0.00189311 | -0.3064395 | 0.062 | 0.115 | 1 NK cells | Hist1h2bc |
| 0.00190153 | 0.31725896 | 0.214 | 0.16  | 1 NK cells | Fam204a   |
| 0.00193523 | 0.30491099 | 0.154 | 0.107 | 1 NK cells | Esyt2     |
| 0.00195708 | 0.32450526 | 0.251 | 0.198 | 1 NK cells | Exosc3    |
| 0.00200662 | 0.27199098 | 0.3   | 0.244 | 1 NK cells | Rnaseh2c  |
| 0.00208006 | 0.30226595 | 0.203 | 0.154 | 1 NK cells | Pdcl3     |
| 0.00209893 | 0.36545226 | 0.111 | 0.071 | 1 NK cells | Snip1     |
| 0.00211436 | 0.25186595 | 0.511 | 0.462 | 1 NK cells | Sec62     |
| 0.00218092 | 0.29328214 | 0.132 | 0.089 | 1 NK cells | Fam53b    |
| 0.00218378 | 0.35907023 | 0.3   | 0.248 | 1 NK cells | Trappc4   |
| 0.00225665 | 0.29132828 | 0.381 | 0.333 | 1 NK cells | Rer1      |
| 0.00227684 | -0.3466754 | 0.457 | 0.52  | 1 NK cells | Rhog      |
| 0.00227906 | 0.33846952 | 0.289 | 0.242 | 1 NK cells | Prmt1     |
| 0.00228195 | 0.31996081 | 0.354 | 0.303 | 1 NK cells | Nt5c      |
| 0.00248574 | 0.3950969  | 0.178 | 0.134 | 1 NK cells | Prkag1    |
| 0.00257431 | 0.30364147 | 0.146 | 0.102 | 1 NK cells | Sfxn1     |
| 0.00265023 | 0.26922195 | 0.151 | 0.105 | 1 NK cells | Trabd     |
| 0.0028234  | -0.5231264 | 0.281 | 0.356 | 1 NK cells | Fosb      |
| 0.00303898 | 0.29236355 | 0.273 | 0.217 | 1 NK cells | Zdhhc20   |
| 0.00304076 | 0.28597272 | 0.132 | 0.09  | 1 NK cells | Fcho1     |
| 0.00310626 | 0.25899744 | 0.362 | 0.315 | 1 NK cells | Bag1      |
| 0.00328299 | 0.31570231 | 0.322 | 0.274 | 1 NK cells | Vps29     |
| 0.00334763 | 0.34037716 | 0.243 | 0.198 | 1 NK cells | Hpcal1    |
| 0.0033832  | 0.28128375 | 0.549 | 0.503 | 1 NK cells | Fam107b   |
| 0.00356612 | 0.27914677 | 0.224 | 0.175 | 1 NK cells | Midn      |
| 0.00366286 | 0.30881268 | 0.262 | 0.217 | 1 NK cells | Rpn2      |
| 0.00373175 | 0.32612292 | 0.219 | 0.171 | 1 NK cells | Syncrip   |
| 0.00388559 | 0.3901513  | 0.259 | 0.214 | 1 NK cells | Stip1     |
| 0.00393923 | 0.32881646 | 0.327 | 0.282 | 1 NK cells | Ddx21     |
| 0.00401685 | -0.2668021 | 0.795 | 0.789 | 1 NK cells | Rpl36a    |

|            |            |       |       |           |             |            |
|------------|------------|-------|-------|-----------|-------------|------------|
| 0.00406761 | 0.38522802 | 0.338 | 0.298 | 1         | NK cells    | Ubxn4      |
| 0.00422023 | 0.32222121 | 0.181 | 0.135 | 1         | NK cells    | Clcn3      |
| 0.0042282  | 0.26434481 | 0.114 | 0.076 | 1         | NK cells    | Tbc1d9b    |
| 0.00428518 | -0.2547672 | 0.227 | 0.303 | 1         | NK cells    | Kpna4      |
| 0.00500936 | 0.32677175 | 0.216 | 0.168 | 1         | NK cells    | Polr2m     |
| 0.00504647 | -0.2855778 | 0.192 | 0.263 | 1         | NK cells    | Mbnl2      |
| 0.00513645 | -0.2505509 | 0.232 | 0.311 | 1         | NK cells    | Wnk1       |
| 0.00524228 | 0.25009072 | 0.303 | 0.255 | 1         | NK cells    | Polr2e     |
| 0.00541187 | -0.9796817 | 0.23  | 0.286 | 1         | NK cells    | Egr1       |
| 0.00548465 | 0.28891383 | 0.108 | 0.072 | 1         | NK cells    | Fbxo34     |
| 0.00581987 | 0.30562682 | 0.224 | 0.174 | 1         | NK cells    | Sun2       |
| 0.0058528  | 0.25548354 | 0.122 | 0.084 | 1         | NK cells    | Qtrt1      |
| 0.00595561 | 0.28174402 | 0.278 | 0.234 | 1         | NK cells    | Eny2       |
| 0.00599099 | 0.25445968 | 0.108 | 0.072 | 1         | NK cells    | D10Wsu102e |
| 0.00604814 | 0.29519364 | 0.273 | 0.227 | 1         | NK cells    | Scamp3     |
| 0.00622009 | -0.5199401 | 0.173 | 0.235 | 1         | NK cells    | Nfkbiz     |
| 0.00626931 | 0.34669821 | 0.27  | 0.225 | 1         | NK cells    | Taf15      |
| 0.00630261 | -0.3271818 | 0.116 | 0.172 | 1         | NK cells    | Gtf2i      |
| 0.00636228 | 0.25255899 | 0.17  | 0.128 | 1         | NK cells    | Stk16      |
| 0.00644562 | 0.25321617 | 0.178 | 0.135 | 1         | NK cells    | Nelfb      |
| 0.00644565 | 0.27628492 | 0.227 | 0.184 | 1         | NK cells    | Kdelr2     |
| 0.00646536 | 0.35075085 | 0.208 | 0.168 | 1         | NK cells    | Rsl1d1     |
| 0.00654657 | 0.2946622  | 0.178 | 0.138 | 1         | NK cells    | Josd2      |
| 0.00683954 | -0.3916109 | 0.508 | 0.548 | 1         | NK cells    | Tsc22d3    |
| 0.00693732 | 0.33378428 | 0.249 | 0.209 | 1         | NK cells    | Cdk4       |
| 0.00741817 | 0.26067757 | 0.327 | 0.283 | 1         | NK cells    | Mrps33     |
| 0.00747759 | -0.2746146 | 0.186 | 0.254 | 1         | NK cells    | Cltc       |
| 0.00751613 | 0.30430795 | 0.3   | 0.263 | 1         | NK cells    | Tmem128    |
| 0.00757758 | 0.25707508 | 0.111 | 0.076 | 1         | NK cells    | Nbeal2     |
| 0.00763786 | 0.25881349 | 0.465 | 0.423 | 1         | NK cells    | Ndufb7     |
| 0.00772404 | 0.26236311 | 0.246 | 0.2   | 1         | NK cells    | Sptan1     |
| 0.00777226 | 0.33912452 | 0.284 | 0.243 | 1         | NK cells    | Rbbp4      |
| 0.00800329 | 0.29109743 | 0.23  | 0.187 | 1         | NK cells    | Nans       |
| 0.00802433 | -0.2649511 | 0.349 | 0.404 | 1         | NK cells    | Akr1a1     |
| 0.00823623 | 0.27681129 | 0.143 | 0.104 | 1         | NK cells    | Ldb1       |
| 0.00889989 | 0.28272408 | 0.338 | 0.288 | 1         | NK cells    | Slbp       |
| 0.00903256 | -0.3804763 | 0.989 | 0.983 | 1         | NK cells    | Malat1     |
| 0.009324   | -0.3738994 | 0.4   | 0.466 | 1         | NK cells    | Pim1       |
| 0.00961952 | 0.29978751 | 0.295 | 0.252 | 1         | NK cells    | Gpr65      |
| 0.00975669 | -0.3108129 | 0.151 | 0.206 | 1         | NK cells    | Gns        |
| 0          | 3.93447674 | 0.859 | 0.018 | 0         | Macrophage: | Pf4        |
| 0          | 2.51062241 | 0.515 | 0.009 | 0         | Macrophage: | Cbr2       |
| 0          | 2.45851822 | 0.657 | 0.012 | 0         | Macrophage: | Mgl2       |
| 0          | 2.0787684  | 0.556 | 0.002 | 0         | Macrophage: | Fcrls      |
| 0          | 1.74158422 | 0.475 | 0.004 | 0         | Macrophage: | Gas6       |
| 0          | 1.51532318 | 0.424 | 0.003 | 0         | Macrophage: | Pmp22      |
| 0          | 1.15257837 | 0.465 | 0.002 | 0         | Macrophage: | Slco2b1    |
| 2.73E-280  | 2.15598179 | 0.778 | 0.036 | 3.87E-276 | Macrophage: | Dab2       |

|           |            |       |       |           |                      |
|-----------|------------|-------|-------|-----------|----------------------|
| 3.58E-237 | 0.99428236 | 0.242 | 0.002 | 5.07E-233 | Macrophage: Cd163    |
| 2.90E-223 | 1.28249203 | 0.414 | 0.011 | 4.10E-219 | Macrophage: Igf1     |
| 5.23E-222 | 2.05821845 | 0.697 | 0.036 | 7.41E-218 | Macrophage: Stab1    |
| 2.87E-217 | 2.07658661 | 0.606 | 0.028 | 4.06E-213 | Macrophage: Cfh      |
| 1.64E-215 | 2.1955284  | 0.667 | 0.034 | 2.33E-211 | Macrophage: Mrc1     |
| 4.58E-215 | 2.21565142 | 0.707 | 0.038 | 6.49E-211 | Macrophage: Hpgd     |
| 4.09E-208 | 1.29725277 | 0.212 | 0.002 | 5.78E-204 | Macrophage: Mmp13    |
| 2.82E-203 | 1.05235888 | 0.273 | 0.004 | 3.99E-199 | Macrophage: Ccl24    |
| 4.05E-192 | 0.97431174 | 0.283 | 0.005 | 5.74E-188 | Macrophage: Fxyd2    |
| 1.51E-179 | 0.99311514 | 0.293 | 0.006 | 2.14E-175 | Macrophage: Gpr34    |
| 5.56E-179 | 2.10862153 | 0.525 | 0.025 | 7.86E-175 | Macrophage: Lpl      |
| 9.07E-161 | 1.63039081 | 0.515 | 0.027 | 1.28E-156 | Macrophage: Lilra5   |
| 1.24E-158 | 1.10173507 | 0.162 | 0.001 | 1.76E-154 | Macrophage: Lyve1    |
| 1.26E-158 | 1.47433025 | 0.444 | 0.02  | 1.78E-154 | Macrophage: Trim47   |
| 1.90E-158 | 1.5798309  | 0.273 | 0.006 | 2.69E-154 | Macrophage: Folr2    |
| 1.63E-152 | 2.32587001 | 0.818 | 0.082 | 2.31E-148 | Macrophage: Trf      |
| 1.89E-149 | 0.66011989 | 0.172 | 0.002 | 2.67E-145 | Macrophage: Col14a1  |
| 3.20E-149 | 0.49082023 | 0.172 | 0.002 | 4.53E-145 | Macrophage: Kitl     |
| 2.83E-142 | 2.24413439 | 0.707 | 0.064 | 4.01E-138 | Macrophage: C3ar1    |
| 9.84E-142 | 0.41352626 | 0.162 | 0.002 | 1.39E-137 | Macrophage: Etv1     |
| 2.01E-141 | 0.97612594 | 0.343 | 0.013 | 2.85E-137 | Macrophage: Abca9    |
| 5.16E-131 | 0.63861536 | 0.242 | 0.006 | 7.30E-127 | Macrophage: Xlr      |
| 7.41E-131 | 0.38672927 | 0.111 | 0.001 | 1.05E-126 | Macrophage: P3h2     |
| 1.46E-129 | 2.20574907 | 0.202 | 0.004 | 2.06E-125 | Macrophage: Cxcl1    |
| 1.64E-129 | 2.66950381 | 0.889 | 0.12  | 2.32E-125 | Macrophage: Tmem176b |
| 3.06E-129 | 1.29557659 | 0.263 | 0.008 | 4.33E-125 | Macrophage: Ltc4s    |
| 6.82E-129 | 1.91612236 | 0.727 | 0.074 | 9.65E-125 | Macrophage: Adgre1   |
| 2.92E-124 | 2.2483448  | 0.525 | 0.038 | 4.13E-120 | Macrophage: F13a1    |
| 7.71E-124 | 0.49210682 | 0.131 | 0.001 | 1.09E-119 | Macrophage: Fcna     |
| 2.82E-122 | 1.45452396 | 0.556 | 0.041 | 3.99E-118 | Macrophage: Igfbp4   |
| 7.70E-120 | 1.21568031 | 0.525 | 0.039 | 1.09E-115 | Macrophage: Dhrs3    |
| 5.77E-118 | 1.91380668 | 0.747 | 0.086 | 8.16E-114 | Macrophage: Tmem176a |
| 3.54E-117 | 2.93192997 | 0.99  | 0.163 | 5.01E-113 | Macrophage: C1qc     |
| 6.66E-115 | 0.88695029 | 0.303 | 0.012 | 9.43E-111 | Macrophage: Ptgs1    |
| 1.59E-110 | 2.73951825 | 0.949 | 0.168 | 2.26E-106 | Macrophage: Csf1r    |
| 3.00E-108 | 1.3923519  | 0.505 | 0.041 | 4.24E-104 | Macrophage: Rnase4   |
| 1.37E-106 | 0.57786189 | 0.172 | 0.004 | 1.94E-102 | Macrophage: Nes      |
| 2.70E-106 | 1.71344876 | 0.768 | 0.1   | 3.82E-102 | Macrophage: Pid1     |
| 4.83E-106 | 1.61690612 | 0.596 | 0.057 | 6.84E-102 | Macrophage: Cd63     |
| 1.07E-105 | 1.61793687 | 0.687 | 0.081 | 1.51E-101 | Macrophage: P2ry6    |
| 2.28E-105 | 2.82697431 | 0.96  | 0.169 | 3.23E-101 | Macrophage: C1qa     |
| 1.89E-103 | 1.21309113 | 0.596 | 0.06  | 2.68E-99  | Macrophage: Camk1    |
| 3.77E-101 | 0.70687561 | 0.101 | 0.001 | 5.34E-97  | Macrophage: Bmp2     |
| 4.20E-101 | 0.44240029 | 0.141 | 0.002 | 5.95E-97  | Macrophage: Ctsf     |
| 3.10E-98  | 2.46766036 | 0.717 | 0.097 | 4.39E-94  | Macrophage: Pltp     |
| 4.68E-98  | 2.71297015 | 0.879 | 0.148 | 6.62E-94  | Macrophage: Mafb     |
| 5.68E-98  | 2.56257198 | 0.96  | 0.196 | 8.04E-94  | Macrophage: Cd81     |
| 1.36E-94  | 2.17665789 | 0.798 | 0.119 | 1.93E-90  | Macrophage: C5ar1    |

|          |            |       |       |          |                       |
|----------|------------|-------|-------|----------|-----------------------|
| 5.00E-94 | 2.53462834 | 0.98  | 0.191 | 7.08E-90 | Macrophage: C1qb      |
| 6.47E-93 | 0.35745514 | 0.131 | 0.002 | 9.16E-89 | Macrophage: Repts2    |
| 2.21E-92 | 0.4249987  | 0.121 | 0.002 | 3.13E-88 | Macrophage: Gm15726   |
| 1.03E-91 | 0.34976394 | 0.141 | 0.003 | 1.45E-87 | Macrophage: Mxra7     |
| 3.24E-91 | 1.28714071 | 0.535 | 0.053 | 4.59E-87 | Macrophage: Cd36      |
| 1.17E-90 | 0.8232086  | 0.263 | 0.012 | 1.65E-86 | Macrophage: Tanc2     |
| 6.02E-90 | 0.70277028 | 0.131 | 0.002 | 8.52E-86 | Macrophage: Adam33    |
| 1.23E-89 | 1.35098058 | 0.485 | 0.045 | 1.74E-85 | Macrophage: Axl       |
| 2.11E-89 | 1.06294717 | 0.414 | 0.033 | 2.98E-85 | Macrophage: Rab3il1   |
| 8.43E-89 | 1.04989002 | 0.414 | 0.033 | 1.19E-84 | Macrophage: Anxa3     |
| 3.54E-87 | 1.06211212 | 0.414 | 0.033 | 5.02E-83 | Macrophage: Zfhx3     |
| 1.03E-86 | 1.81869071 | 0.677 | 0.092 | 1.46E-82 | Macrophage: Slamf9    |
| 4.34E-86 | 0.99738718 | 0.333 | 0.021 | 6.14E-82 | Macrophage: Plxdc2    |
| 1.59E-85 | 0.84331374 | 0.162 | 0.004 | 2.25E-81 | Macrophage: Il1a      |
| 2.23E-84 | 3.62358778 | 0.889 | 0.186 | 3.15E-80 | Macrophage: Mt1       |
| 1.77E-83 | 2.21388238 | 0.697 | 0.104 | 2.51E-79 | Macrophage: Tnf       |
| 7.81E-83 | 0.65711234 | 0.313 | 0.019 | 1.11E-78 | Macrophage: Alox5     |
| 2.04E-82 | 3.54015274 | 0.99  | 0.289 | 2.89E-78 | Macrophage: Apoe      |
| 4.19E-81 | 0.88174383 | 0.354 | 0.026 | 5.94E-77 | Macrophage: Hpgds     |
| 9.31E-81 | 0.30983753 | 0.111 | 0.002 | 1.32E-76 | Macrophage: Rhobtb1   |
| 1.69E-80 | 0.57715096 | 0.162 | 0.005 | 2.39E-76 | Macrophage: Timd4     |
| 8.72E-80 | 2.87824262 | 0.727 | 0.123 | 1.23E-75 | Macrophage: Hmox1     |
| 2.97E-75 | 1.58300389 | 0.646 | 0.097 | 4.20E-71 | Macrophage: Timp2     |
| 3.90E-75 | 1.88944915 | 0.788 | 0.147 | 5.52E-71 | Macrophage: App       |
| 1.14E-73 | 2.45577457 | 0.859 | 0.18  | 1.62E-69 | Macrophage: Cd14      |
| 5.15E-73 | 0.32366534 | 0.101 | 0.002 | 7.28E-69 | Macrophage: Colec12   |
| 8.05E-71 | 0.92305806 | 0.414 | 0.041 | 1.14E-66 | Macrophage: Lacc1     |
| 1.57E-70 | 1.46980689 | 0.131 | 0.003 | 2.22E-66 | Macrophage: Mmp12     |
| 1.98E-70 | 1.07593685 | 0.394 | 0.037 | 2.80E-66 | Macrophage: Rgl1      |
| 4.14E-70 | 3.36453943 | 0.919 | 0.275 | 5.86E-66 | Macrophage: Egr1      |
| 4.98E-70 | 0.68627496 | 0.253 | 0.015 | 7.05E-66 | Macrophage: Rab11fip5 |
| 1.60E-67 | 1.63169411 | 0.879 | 0.198 | 2.26E-63 | Macrophage: Lgmn      |
| 3.42E-67 | 1.58668165 | 0.667 | 0.114 | 4.84E-63 | Macrophage: Cx3cr1    |
| 1.98E-65 | 2.54314179 | 0.859 | 0.224 | 2.81E-61 | Macrophage: Nfkbiz    |
| 3.40E-65 | 0.76883315 | 0.333 | 0.029 | 4.81E-61 | Macrophage: Gas7      |
| 9.56E-65 | 1.57559389 | 0.576 | 0.085 | 1.35E-60 | Macrophage: Ms4a7     |
| 1.16E-64 | 0.57055075 | 0.263 | 0.018 | 1.65E-60 | Macrophage: Arhgap22  |
| 2.49E-64 | 1.23437917 | 0.424 | 0.048 | 3.52E-60 | Macrophage: Ccnd1     |
| 5.74E-64 | 0.77517739 | 0.263 | 0.018 | 8.13E-60 | Macrophage: Stard8    |
| 2.50E-63 | 1.72066513 | 0.758 | 0.165 | 3.55E-59 | Macrophage: Hexa      |
| 7.81E-63 | 0.53981485 | 0.222 | 0.013 | 1.11E-58 | Macrophage: Serpinb8  |
| 2.67E-62 | 2.88304376 | 0.899 | 0.282 | 3.78E-58 | Macrophage: Rhob      |
| 1.73E-60 | 1.21602472 | 0.434 | 0.054 | 2.44E-56 | Macrophage: Itgb5     |
| 5.65E-60 | 1.66453632 | 0.899 | 0.219 | 8.00E-56 | Macrophage: Fcgr3     |
| 1.50E-59 | 2.55246114 | 0.98  | 0.343 | 2.12E-55 | Macrophage: Lyz2      |
| 5.92E-59 | 1.24602982 | 0.455 | 0.059 | 8.38E-55 | Macrophage: Cebpa     |
| 7.12E-59 | 1.26699103 | 0.606 | 0.107 | 1.01E-54 | Macrophage: Pea15a    |
| 1.18E-58 | 0.8785109  | 0.424 | 0.051 | 1.67E-54 | Macrophage: Dse       |

|          |            |       |       |          |                      |
|----------|------------|-------|-------|----------|----------------------|
| 6.76E-58 | 2.48998196 | 0.808 | 0.215 | 9.57E-54 | Macrophage: Marcks11 |
| 4.10E-57 | 1.32480772 | 0.404 | 0.049 | 5.80E-53 | Macrophage: Creb5    |
| 4.89E-57 | 1.5954153  | 0.808 | 0.206 | 6.93E-53 | Macrophage: Rgs10    |
| 5.87E-57 | 1.47555364 | 0.646 | 0.121 | 8.31E-53 | Macrophage: Maf      |
| 1.36E-56 | 0.94052925 | 0.303 | 0.027 | 1.93E-52 | Macrophage: Lifr     |
| 4.81E-56 | 2.59073223 | 0.929 | 0.315 | 6.80E-52 | Macrophage: Atf3     |
| 5.60E-56 | 0.61244417 | 0.242 | 0.017 | 7.93E-52 | Macrophage: Serpinf1 |
| 6.38E-56 | 1.59401666 | 0.869 | 0.221 | 9.02E-52 | Macrophage: Cd68     |
| 8.97E-56 | 0.92076384 | 0.343 | 0.035 | 1.27E-51 | Macrophage: Mid1     |
| 1.42E-54 | 1.37921425 | 0.848 | 0.206 | 2.01E-50 | Macrophage: Grn      |
| 2.17E-54 | 1.52140547 | 0.566 | 0.1   | 3.07E-50 | Macrophage: Fcgrt    |
| 8.01E-54 | 0.88492526 | 0.384 | 0.045 | 1.13E-49 | Macrophage: Cd33     |
| 9.29E-54 | 0.65847677 | 0.263 | 0.022 | 1.31E-49 | Macrophage: Cysltr1  |
| 1.06E-53 | 2.03961465 | 0.636 | 0.131 | 1.50E-49 | Macrophage: Lmna     |
| 1.43E-53 | 2.56516358 | 0.616 | 0.124 | 2.03E-49 | Macrophage: Bag3     |
| 2.43E-53 | 2.52182182 | 0.838 | 0.248 | 3.44E-49 | Macrophage: Ier3     |
| 4.89E-53 | 0.70852444 | 0.273 | 0.023 | 6.93E-49 | Macrophage: Itsn1    |
| 8.36E-53 | 3.0585542  | 0.96  | 0.45  | 1.18E-48 | Macrophage: Jun      |
| 7.73E-52 | 1.11434656 | 0.646 | 0.13  | 1.09E-47 | Macrophage: Abhd12   |
| 8.91E-52 | 0.36876718 | 0.131 | 0.005 | 1.26E-47 | Macrophage: Rnf150   |
| 3.10E-51 | 0.27791262 | 0.101 | 0.003 | 4.39E-47 | Macrophage: Nuak1    |
| 3.92E-51 | 0.49665961 | 0.212 | 0.015 | 5.55E-47 | Macrophage: Sult1a1  |
| 6.39E-51 | 1.96251314 | 0.97  | 0.37  | 9.05E-47 | Macrophage: Ctsc     |
| 4.18E-50 | 0.52658108 | 0.182 | 0.011 | 5.92E-46 | Macrophage: Ang      |
| 5.82E-50 | 0.28599249 | 0.121 | 0.005 | 8.24E-46 | Macrophage: Zfp658   |
| 1.31E-49 | 0.95978266 | 0.444 | 0.066 | 1.85E-45 | Macrophage: Adam15   |
| 1.43E-49 | 1.13122631 | 0.657 | 0.134 | 2.02E-45 | Macrophage: Asah1    |
| 5.90E-49 | 0.94825611 | 0.596 | 0.115 | 8.36E-45 | Macrophage: Cyfip1   |
| 7.04E-49 | 1.75631843 | 0.758 | 0.208 | 9.97E-45 | Macrophage: Hexb     |
| 2.92E-48 | 1.10701413 | 0.374 | 0.048 | 4.13E-44 | Macrophage: Clec4n   |
| 9.11E-48 | 1.00940883 | 0.444 | 0.068 | 1.29E-43 | Macrophage: Rab7b    |
| 2.11E-47 | 1.1842477  | 0.667 | 0.143 | 2.99E-43 | Macrophage: Myadm    |
| 4.15E-47 | 1.45926154 | 0.838 | 0.252 | 5.87E-43 | Macrophage: Rtn4     |
| 5.29E-47 | 1.19251974 | 0.273 | 0.027 | 7.49E-43 | Macrophage: Rnd3     |
| 6.71E-47 | 1.10699946 | 0.636 | 0.133 | 9.51E-43 | Macrophage: Sirpa    |
| 1.19E-46 | 1.40842376 | 0.657 | 0.147 | 1.68E-42 | Macrophage: Ckb      |
| 1.90E-46 | 1.23745362 | 0.747 | 0.189 | 2.69E-42 | Macrophage: Lamp2    |
| 7.96E-46 | 0.93781582 | 0.808 | 0.195 | 1.13E-41 | Macrophage: Tgfbi    |
| 8.77E-46 | 0.45967873 | 0.182 | 0.012 | 1.24E-41 | Macrophage: Soga1    |
| 1.04E-45 | 0.78744145 | 0.273 | 0.027 | 1.48E-41 | Macrophage: Rin2     |
| 1.32E-45 | 1.60075018 | 0.899 | 0.319 | 1.87E-41 | Macrophage: Lamp1    |
| 6.17E-45 | 0.8934681  | 0.394 | 0.057 | 8.74E-41 | Macrophage: Ptpro    |
| 9.94E-45 | 2.78290561 | 0.677 | 0.176 | 1.41E-40 | Macrophage: Cxcl2    |
| 2.18E-44 | 0.45831129 | 0.232 | 0.02  | 3.09E-40 | Macrophage: Sbf2     |
| 5.01E-44 | 1.57704229 | 0.525 | 0.106 | 7.09E-40 | Macrophage: Tubb6    |
| 7.40E-44 | 1.09065669 | 0.737 | 0.181 | 1.05E-39 | Macrophage: Csf2ra   |
| 7.79E-44 | 0.65367613 | 0.333 | 0.042 | 1.10E-39 | Macrophage: Cmklr1   |
| 9.20E-44 | 1.1882848  | 0.596 | 0.122 | 1.30E-39 | Macrophage: Cxcl16   |



|          |            |       |       |          |                      |
|----------|------------|-------|-------|----------|----------------------|
| 9.95E-44 | 0.54584958 | 0.202 | 0.016 | 1.41E-39 | Macrophage: Lima1    |
| 1.04E-43 | 2.37032295 | 0.798 | 0.253 | 1.47E-39 | Macrophage: Cdkn1a   |
| 1.50E-43 | 0.57179017 | 0.212 | 0.017 | 2.13E-39 | Macrophage: B4galt6  |
| 2.00E-43 | 0.78926328 | 0.364 | 0.05  | 2.84E-39 | Macrophage: Eps8     |
| 6.56E-43 | 1.59729946 | 0.99  | 0.565 | 9.29E-39 | Macrophage: Cst3     |
| 1.46E-42 | 1.04395418 | 0.444 | 0.072 | 2.07E-38 | Macrophage: St3gal6  |
| 2.47E-42 | 2.31236268 | 0.97  | 0.612 | 3.49E-38 | Macrophage: Zfp36    |
| 3.62E-42 | 2.9547436  | 0.919 | 0.458 | 5.12E-38 | Macrophage: Hspa1a   |
| 6.17E-42 | 1.15918092 | 0.333 | 0.044 | 8.73E-38 | Macrophage: Egr2     |
| 6.94E-42 | 0.84220067 | 0.414 | 0.066 | 9.82E-38 | Macrophage: Idh2     |
| 7.53E-42 | 1.53907063 | 1     | 0.933 | 1.07E-37 | Macrophage: Ftl1     |
| 8.32E-42 | 1.14326206 | 0.505 | 0.099 | 1.18E-37 | Macrophage: Nfic     |
| 4.19E-41 | 2.45007227 | 0.99  | 0.644 | 5.94E-37 | Macrophage: Fos      |
| 4.39E-41 | 2.21253766 | 0.768 | 0.248 | 6.22E-37 | Macrophage: Glul     |
| 5.48E-41 | 1.41811401 | 0.636 | 0.15  | 7.76E-37 | Macrophage: Ctsl     |
| 6.92E-41 | 0.68846471 | 0.313 | 0.04  | 9.79E-37 | Macrophage: Pla2g15  |
| 7.09E-41 | 0.43180914 | 0.182 | 0.014 | 1.00E-36 | Macrophage: Kcnk13   |
| 8.53E-41 | 0.40925041 | 0.141 | 0.008 | 1.21E-36 | Macrophage: Psd3     |
| 2.74E-40 | 1.73338424 | 0.939 | 0.433 | 3.88E-36 | Macrophage: Ctsb     |
| 2.76E-40 | 1.08622759 | 0.646 | 0.155 | 3.91E-36 | Macrophage: Marcks   |
| 5.34E-40 | 1.95460319 | 0.667 | 0.184 | 7.55E-36 | Macrophage: Icam1    |
| 6.95E-40 | 0.31452177 | 0.111 | 0.005 | 9.84E-36 | Macrophage: Spaca6   |
| 1.53E-39 | 0.64057296 | 0.192 | 0.016 | 2.16E-35 | Macrophage: Olfml3   |
| 2.30E-39 | 1.08231282 | 0.737 | 0.193 | 3.26E-35 | Macrophage: Fcgr2b   |
| 2.45E-39 | 0.31723735 | 0.111 | 0.005 | 3.46E-35 | Macrophage: B3galnt1 |
| 3.30E-39 | 0.29159148 | 0.131 | 0.007 | 4.67E-35 | Macrophage: Cracr2b  |
| 3.33E-39 | 1.17317975 | 0.434 | 0.075 | 4.71E-35 | Macrophage: Gatm     |
| 3.75E-39 | 0.84905726 | 0.444 | 0.079 | 5.30E-35 | Macrophage: Hacd4    |
| 7.95E-39 | 0.99533473 | 0.465 | 0.088 | 1.13E-34 | Macrophage: Clec4a2  |
| 8.31E-39 | 1.44699534 | 0.909 | 0.341 | 1.18E-34 | Macrophage: Unc93b1  |
| 8.41E-39 | 0.59150849 | 0.293 | 0.037 | 1.19E-34 | Macrophage: Sash1    |
| 1.09E-38 | 1.02043259 | 0.667 | 0.165 | 1.55E-34 | Macrophage: Lrrc25   |
| 1.54E-38 | 2.0952715  | 0.828 | 0.346 | 2.17E-34 | Macrophage: Fosb     |
| 1.74E-38 | 0.34942394 | 0.111 | 0.005 | 2.46E-34 | Macrophage: Trpv4    |
| 2.06E-38 | 0.25713862 | 0.111 | 0.005 | 2.91E-34 | Macrophage: Scamp5   |
| 3.92E-38 | 1.07526287 | 0.424 | 0.075 | 5.54E-34 | Macrophage: Trem2    |
| 4.23E-38 | 0.88294514 | 0.414 | 0.074 | 5.99E-34 | Macrophage: Cmtm3    |
| 5.03E-38 | 0.98434923 | 0.495 | 0.099 | 7.11E-34 | Macrophage: Tlr2     |
| 7.76E-38 | 0.69271745 | 0.232 | 0.024 | 1.10E-33 | Macrophage: Pros1    |
| 1.91E-37 | 2.00674689 | 0.818 | 0.297 | 2.71E-33 | Macrophage: Klf4     |
| 3.47E-37 | 1.26204008 | 0.687 | 0.2   | 4.92E-33 | Macrophage: Ehd4     |
| 4.33E-37 | 0.90581287 | 0.475 | 0.094 | 6.13E-33 | Macrophage: Lpcat2   |
| 5.04E-37 | 1.8144448  | 1     | 0.741 | 7.13E-33 | Macrophage: Ubc      |
| 5.06E-37 | 0.77512112 | 0.556 | 0.118 | 7.16E-33 | Macrophage: Slc11a1  |
| 8.97E-37 | 1.40377433 | 0.505 | 0.108 | 1.27E-32 | Macrophage: Ccl9     |
| 9.31E-37 | 0.53296146 | 0.162 | 0.012 | 1.32E-32 | Macrophage: Rac3     |
| 1.03E-36 | 0.70464094 | 0.364 | 0.058 | 1.46E-32 | Macrophage: Tbxas1   |
| 1.06E-36 | 2.70602962 | 0.485 | 0.102 | 1.50E-32 | Macrophage: Ccl2     |

|          |            |       |       |          |                       |
|----------|------------|-------|-------|----------|-----------------------|
| 1.15E-36 | 0.29832528 | 0.172 | 0.014 | 1.63E-32 | Macrophage: Scamp1    |
| 1.20E-36 | 0.78474782 | 0.303 | 0.041 | 1.71E-32 | Macrophage: Mob3c     |
| 1.99E-36 | 0.9583572  | 0.515 | 0.111 | 2.82E-32 | Macrophage: Tpp1      |
| 2.55E-36 | 1.40358592 | 0.636 | 0.161 | 3.61E-32 | Macrophage: Adrb2     |
| 2.56E-36 | 1.28690702 | 1     | 0.526 | 3.62E-32 | Macrophage: Psap      |
| 2.71E-36 | 1.96484028 | 0.939 | 0.62  | 3.83E-32 | Macrophage: Dusp1     |
| 2.74E-36 | 0.9043255  | 0.667 | 0.168 | 3.88E-32 | Macrophage: Mpeg1     |
| 5.63E-36 | -2.4005123 | 0.808 | 0.928 | 7.97E-32 | Macrophage: Tmsb10    |
| 1.17E-35 | 0.5091014  | 0.232 | 0.025 | 1.66E-31 | Macrophage: Ctbp2     |
| 1.87E-35 | 0.75769386 | 0.364 | 0.059 | 2.65E-31 | Macrophage: Tmem37    |
| 3.55E-35 | 0.61928183 | 0.293 | 0.04  | 5.03E-31 | Macrophage: Cryl1     |
| 4.01E-35 | 1.18307871 | 0.808 | 0.269 | 5.68E-31 | Macrophage: Liltrb4a  |
| 4.84E-35 | 1.9013151  | 0.879 | 0.456 | 6.85E-31 | Macrophage: Ier5      |
| 4.86E-35 | 1.31575602 | 0.869 | 0.345 | 6.89E-31 | Macrophage: Ctsa      |
| 5.01E-35 | 0.9715612  | 0.606 | 0.157 | 7.09E-31 | Macrophage: Gusb      |
| 5.36E-35 | 0.28118558 | 0.141 | 0.01  | 7.58E-31 | Macrophage: Cav2      |
| 7.35E-35 | 0.35090491 | 0.162 | 0.013 | 1.04E-30 | Macrophage: Fblim1    |
| 7.40E-35 | 0.94601897 | 0.253 | 0.03  | 1.05E-30 | Macrophage: Cyp27a1   |
| 1.08E-34 | 0.43547062 | 0.182 | 0.016 | 1.53E-30 | Macrophage: Gas2l1    |
| 1.10E-34 | 0.36933837 | 0.141 | 0.01  | 1.56E-30 | Macrophage: Gpr84     |
| 1.86E-34 | 1.00930328 | 0.747 | 0.224 | 2.64E-30 | Macrophage: Zeb2      |
| 5.66E-34 | 0.80176    | 0.434 | 0.085 | 8.01E-30 | Macrophage: Cd302     |
| 6.97E-34 | 0.94202188 | 0.596 | 0.153 | 9.87E-30 | Macrophage: Cndp2     |
| 1.16E-33 | 0.98850907 | 0.657 | 0.184 | 1.64E-29 | Macrophage: Sh3bgrl   |
| 2.15E-33 | 0.88255649 | 0.525 | 0.121 | 3.04E-29 | Macrophage: Prcp      |
| 3.11E-33 | 1.87773049 | 0.737 | 0.281 | 4.40E-29 | Macrophage: Soc3      |
| 3.51E-33 | 1.32902498 | 0.111 | 0.006 | 4.97E-29 | Macrophage: Lyz1      |
| 4.57E-33 | 0.6646694  | 0.414 | 0.079 | 6.46E-29 | Macrophage: Hfe       |
| 6.16E-33 | 0.68860405 | 0.303 | 0.045 | 8.72E-29 | Macrophage: Cttnbp2nl |
| 8.69E-33 | 0.50359584 | 0.222 | 0.025 | 1.23E-28 | Macrophage: Dapk1     |
| 8.86E-33 | 0.84126224 | 0.424 | 0.086 | 1.25E-28 | Macrophage: Ntpcr     |
| 1.82E-32 | 1.47222151 | 0.293 | 0.044 | 2.57E-28 | Macrophage: Tnfsf9    |
| 1.83E-32 | 0.85482565 | 0.364 | 0.065 | 2.59E-28 | Macrophage: Daglb     |
| 2.28E-32 | 1.0905147  | 0.384 | 0.071 | 3.23E-28 | Macrophage: Maff      |
| 2.84E-32 | 0.61034037 | 0.333 | 0.054 | 4.01E-28 | Macrophage: Gnaq      |
| 3.99E-32 | 0.6493835  | 0.263 | 0.036 | 5.65E-28 | Macrophage: Clec5a    |
| 4.29E-32 | 1.86983658 | 0.303 | 0.047 | 6.08E-28 | Macrophage: Ccl12     |
| 4.71E-32 | 0.5431065  | 0.232 | 0.028 | 6.67E-28 | Macrophage: Spred1    |
| 7.31E-32 | 0.41023591 | 0.202 | 0.021 | 1.04E-27 | Macrophage: Mfhas1    |
| 2.90E-31 | 0.8853571  | 0.606 | 0.162 | 4.10E-27 | Macrophage: Rassf4    |
| 2.91E-31 | 1.36605609 | 0.778 | 0.288 | 4.12E-27 | Macrophage: Anxa5     |
| 3.64E-31 | 0.76881298 | 0.404 | 0.08  | 5.15E-27 | Macrophage: Rhoc      |
| 4.00E-31 | 0.78127609 | 0.424 | 0.088 | 5.67E-27 | Macrophage: Pepd      |
| 5.36E-31 | 0.97611164 | 0.818 | 0.272 | 7.58E-27 | Macrophage: Cybb      |
| 5.76E-31 | 0.74127138 | 0.465 | 0.102 | 8.15E-27 | Macrophage: Sdc3      |
| 6.48E-31 | 0.757627   | 0.374 | 0.069 | 9.18E-27 | Macrophage: Dpep2     |
| 7.78E-31 | 0.53513606 | 0.303 | 0.047 | 1.10E-26 | Macrophage: Il13ra1   |
| 7.85E-31 | 0.69665921 | 0.939 | 0.299 | 1.11E-26 | Macrophage: Alox5ap   |

|          |            |       |       |          |                       |
|----------|------------|-------|-------|----------|-----------------------|
| 8.57E-31 | 0.79033154 | 0.556 | 0.142 | 1.21E-26 | Macrophage: Mfsd1     |
| 9.94E-31 | 0.7547353  | 0.566 | 0.14  | 1.41E-26 | Macrophage: Clec4a3   |
| 1.32E-30 | 0.63121608 | 0.636 | 0.16  | 1.86E-26 | Macrophage: Aif1      |
| 1.69E-30 | 0.46318636 | 0.192 | 0.02  | 2.39E-26 | Macrophage: Fads1     |
| 1.97E-30 | 0.82776405 | 0.293 | 0.046 | 2.79E-26 | Macrophage: Wwp1      |
| 4.27E-30 | 0.65630822 | 0.424 | 0.087 | 6.04E-26 | Macrophage: Lmo2      |
| 5.25E-30 | 0.60802685 | 0.364 | 0.068 | 7.43E-26 | Macrophage: Tfe3      |
| 5.90E-30 | 0.97275864 | 0.737 | 0.229 | 8.35E-26 | Macrophage: Pld4      |
| 7.86E-30 | 0.70882324 | 0.374 | 0.072 | 1.11E-25 | Macrophage: Ralb      |
| 9.62E-30 | 0.78605264 | 0.455 | 0.101 | 1.36E-25 | Macrophage: Lrp1      |
| 9.65E-30 | 0.49176452 | 0.242 | 0.032 | 1.37E-25 | Macrophage: Dpp7      |
| 1.24E-29 | 0.65519502 | 0.192 | 0.021 | 1.76E-25 | Macrophage: 8-Mar     |
| 1.31E-29 | 0.54532184 | 0.364 | 0.067 | 1.85E-25 | Macrophage: Rab31     |
| 1.33E-29 | 0.40735775 | 0.202 | 0.023 | 1.89E-25 | Macrophage: Jup       |
| 1.59E-29 | 0.98423849 | 0.485 | 0.116 | 2.25E-25 | Macrophage: Clec4a1   |
| 1.64E-29 | 1.01997077 | 0.717 | 0.242 | 2.32E-25 | Macrophage: Arrb2     |
| 2.03E-29 | 0.49996185 | 0.222 | 0.028 | 2.87E-25 | Macrophage: Tnfrsf11a |
| 2.27E-29 | 0.73485716 | 0.354 | 0.066 | 3.21E-25 | Macrophage: Plxn2     |
| 3.55E-29 | 0.63591706 | 0.131 | 0.01  | 5.02E-25 | Macrophage: Arc       |
| 3.67E-29 | 0.57946664 | 0.172 | 0.017 | 5.19E-25 | Macrophage: Cdr2      |
| 4.21E-29 | 0.46162687 | 0.333 | 0.058 | 5.96E-25 | Macrophage: Ptafr     |
| 5.34E-29 | 0.94005884 | 0.677 | 0.213 | 7.55E-25 | Macrophage: Runx1     |
| 1.46E-28 | 1.63278837 | 0.929 | 0.522 | 2.07E-24 | Macrophage: Ppp1r15a  |
| 1.72E-28 | 1.32953116 | 0.97  | 0.875 | 2.43E-24 | Macrophage: Junb      |
| 2.73E-28 | 0.83515797 | 0.444 | 0.104 | 3.86E-24 | Macrophage: Vkorc1    |
| 3.85E-28 | 1.38762978 | 0.929 | 0.492 | 5.44E-24 | Macrophage: Serinc3   |
| 8.00E-28 | 0.98683058 | 0.525 | 0.134 | 1.13E-23 | Macrophage: Sdc4      |
| 1.27E-27 | 0.53881305 | 0.152 | 0.014 | 1.79E-23 | Macrophage: Etv5      |
| 1.43E-27 | 0.66507909 | 0.323 | 0.058 | 2.03E-23 | Macrophage: Dusp6     |
| 1.57E-27 | 0.90471894 | 0.576 | 0.168 | 2.23E-23 | Macrophage: Tm6sf1    |
| 1.69E-27 | 0.75099908 | 0.364 | 0.073 | 2.39E-23 | Macrophage: Myo5a     |
| 2.18E-27 | 0.47127397 | 0.192 | 0.023 | 3.09E-23 | Macrophage: Selenbp1  |
| 2.87E-27 | 1.02028986 | 0.808 | 0.3   | 4.07E-23 | Macrophage: Ly86      |
| 3.25E-27 | 0.60729258 | 0.162 | 0.016 | 4.60E-23 | Macrophage: Plau      |
| 4.38E-27 | 1.00076294 | 0.687 | 0.233 | 6.20E-23 | Macrophage: Lilr4b    |
| 4.77E-27 | 1.19889849 | 0.98  | 0.821 | 6.75E-23 | Macrophage: Itm2b     |
| 4.78E-27 | 0.64130971 | 0.242 | 0.035 | 6.77E-23 | Macrophage: Cd93      |
| 4.91E-27 | 1.11645248 | 0.111 | 0.008 | 6.95E-23 | Macrophage: Gdf15     |
| 8.54E-27 | 1.69306742 | 0.929 | 0.659 | 1.21E-22 | Macrophage: Klf6      |
| 1.00E-26 | 1.56573418 | 0.333 | 0.064 | 1.42E-22 | Macrophage: Ecm1      |
| 1.87E-26 | 1.23775729 | 0.687 | 0.253 | 2.65E-22 | Macrophage: Wsb1      |
| 2.10E-26 | 0.69749331 | 0.313 | 0.059 | 2.97E-22 | Macrophage: Pdlim4    |
| 2.35E-26 | 1.86272663 | 0.859 | 0.49  | 3.32E-22 | Macrophage: Hspa1b    |
| 3.07E-26 | 0.32312847 | 0.141 | 0.013 | 4.34E-22 | Macrophage: Pald1     |
| 3.30E-26 | 0.62958072 | 0.364 | 0.076 | 4.68E-22 | Macrophage: Mknk1     |
| 3.69E-26 | 1.00697598 | 0.404 | 0.091 | 5.23E-22 | Macrophage: Gm6377    |
| 3.92E-26 | 0.7178123  | 0.374 | 0.079 | 5.55E-22 | Macrophage: Lyl1      |
| 4.59E-26 | 0.50249937 | 0.222 | 0.031 | 6.49E-22 | Macrophage: Clec4b1   |

|          |            |       |       |          |                         |
|----------|------------|-------|-------|----------|-------------------------|
| 5.22E-26 | 0.35992526 | 0.192 | 0.023 | 7.39E-22 | Macrophage: Ext1        |
| 6.22E-26 | 0.55531194 | 0.242 | 0.037 | 8.81E-22 | Macrophage: Gna12       |
| 6.94E-26 | 0.51505187 | 0.263 | 0.043 | 9.83E-22 | Macrophage: Ptov1       |
| 8.69E-26 | 1.27415279 | 0.939 | 0.594 | 1.23E-21 | Macrophage: Nfkbia      |
| 9.01E-26 | 0.5835559  | 0.313 | 0.059 | 1.28E-21 | Macrophage: Zeb2os      |
| 9.83E-26 | 0.65578058 | 0.444 | 0.106 | 1.39E-21 | Macrophage: Nlrp3       |
| 1.04E-25 | 0.95310544 | 0.596 | 0.19  | 1.47E-21 | Macrophage: Mef2a       |
| 1.05E-25 | 1.24581992 | 0.798 | 0.347 | 1.48E-21 | Macrophage: Sdcbp       |
| 1.60E-25 | 0.3605282  | 0.222 | 0.031 | 2.26E-21 | Macrophage: Mfge8       |
| 2.24E-25 | 0.79676424 | 0.303 | 0.057 | 3.17E-21 | Macrophage: Smagp       |
| 2.36E-25 | 0.64791286 | 0.556 | 0.158 | 3.34E-21 | Macrophage: Gsn         |
| 2.43E-25 | 1.31782365 | 0.596 | 0.194 | 3.43E-21 | Macrophage: Kctd12      |
| 2.67E-25 | -1.296166  | 0.97  | 0.927 | 3.78E-21 | Macrophage: Rpsa        |
| 2.84E-25 | 0.40284445 | 0.222 | 0.032 | 4.02E-21 | Macrophage: Mtus1       |
| 3.23E-25 | 0.87364691 | 0.545 | 0.159 | 4.57E-21 | Macrophage: Blvrb       |
| 4.57E-25 | 1.10310819 | 0.626 | 0.201 | 6.47E-21 | Macrophage: Plin2       |
| 5.17E-25 | 0.91363972 | 0.586 | 0.184 | 7.32E-21 | Macrophage: Tubb2a      |
| 5.54E-25 | 0.5433623  | 0.182 | 0.022 | 7.84E-21 | Macrophage: Man1c1      |
| 6.95E-25 | 0.61872098 | 0.444 | 0.11  | 9.84E-21 | Macrophage: Fes         |
| 7.02E-25 | 0.7833265  | 0.616 | 0.193 | 9.93E-21 | Macrophage: Itm2c       |
| 9.09E-25 | 0.54245414 | 0.303 | 0.057 | 1.29E-20 | Macrophage: Aoah        |
| 9.53E-25 | 0.6712474  | 0.263 | 0.044 | 1.35E-20 | Macrophage: Vat1        |
| 1.07E-24 | 0.45213167 | 0.768 | 0.254 | 1.52E-20 | Macrophage: Ccl6        |
| 1.26E-24 | 0.53858006 | 0.263 | 0.045 | 1.79E-20 | Macrophage: Itpripl2    |
| 1.38E-24 | 1.22895937 | 0.707 | 0.261 | 1.96E-20 | Macrophage: Clic4       |
| 1.41E-24 | 0.74328626 | 0.333 | 0.067 | 1.99E-20 | Macrophage: Atp6v0a1    |
| 1.72E-24 | 0.68679261 | 0.323 | 0.066 | 2.43E-20 | Macrophage: Dnase1l1    |
| 1.86E-24 | 0.2597809  | 0.131 | 0.012 | 2.63E-20 | Macrophage: Snta1       |
| 2.13E-24 | 1.06122543 | 0.848 | 0.394 | 3.01E-20 | Macrophage: Neat1       |
| 2.74E-24 | 0.42450861 | 0.212 | 0.03  | 3.89E-20 | Macrophage: Wdfy3       |
| 3.09E-24 | 0.90320901 | 0.687 | 0.245 | 4.38E-20 | Macrophage: Cltc        |
| 4.00E-24 | 0.58424332 | 0.444 | 0.113 | 5.66E-20 | Macrophage: Rnpep       |
| 6.08E-24 | 0.40247571 | 0.212 | 0.03  | 8.61E-20 | Macrophage: Arsa        |
| 6.93E-24 | 1.40647657 | 0.758 | 0.299 | 9.81E-20 | Macrophage: Cd83        |
| 7.12E-24 | 0.2897316  | 0.111 | 0.009 | 1.01E-19 | Macrophage: 2510009E07F |
| 7.30E-24 | 0.98515643 | 0.798 | 0.307 | 1.03E-19 | Macrophage: Ctsh        |
| 8.18E-24 | 0.94083471 | 0.424 | 0.109 | 1.16E-19 | Macrophage: Basp1       |
| 1.19E-23 | 0.626287   | 0.394 | 0.096 | 1.68E-19 | Macrophage: Tmem106a    |
| 1.75E-23 | 0.59834356 | 0.354 | 0.078 | 2.48E-19 | Macrophage: Rasa4       |
| 1.87E-23 | 0.91152888 | 0.515 | 0.154 | 2.65E-19 | Macrophage: Metrnl      |
| 2.05E-23 | 0.60021245 | 0.323 | 0.066 | 2.90E-19 | Macrophage: Sgpp1       |
| 2.26E-23 | 1.69971813 | 0.404 | 0.103 | 3.21E-19 | Macrophage: Cfp         |
| 2.40E-23 | 0.28754421 | 0.101 | 0.008 | 3.39E-19 | Macrophage: Clmp        |
| 3.38E-23 | 0.61643827 | 0.586 | 0.172 | 4.79E-19 | Macrophage: Pla2g7      |
| 3.40E-23 | 0.87515302 | 0.444 | 0.121 | 4.81E-19 | Macrophage: Lipa        |
| 3.72E-23 | 0.85643123 | 0.535 | 0.165 | 5.27E-19 | Macrophage: Nrp1        |
| 3.99E-23 | 0.61062537 | 0.414 | 0.103 | 5.65E-19 | Macrophage: Acer3       |
| 4.09E-23 | 0.26537831 | 0.131 | 0.013 | 5.78E-19 | Macrophage: Pld1        |

|          |            |       |       |          |                      |
|----------|------------|-------|-------|----------|----------------------|
| 8.41E-23 | 0.71047106 | 0.556 | 0.165 | 1.19E-18 | Macrophage: Irf5     |
| 8.83E-23 | 0.58534889 | 0.465 | 0.122 | 1.25E-18 | Macrophage: Tcf4     |
| 1.57E-22 | 0.63119569 | 0.475 | 0.131 | 2.22E-18 | Macrophage: Apobec1  |
| 1.60E-22 | 0.98032137 | 0.364 | 0.085 | 2.27E-18 | Macrophage: Ephx1    |
| 1.85E-22 | 0.50879448 | 0.192 | 0.027 | 2.62E-18 | Macrophage: Slc7a8   |
| 2.51E-22 | 0.2655402  | 0.141 | 0.015 | 3.55E-18 | Macrophage: Pld2     |
| 3.75E-22 | 0.99170298 | 0.798 | 0.372 | 5.31E-18 | Macrophage: Gadd45b  |
| 3.75E-22 | 1.11098953 | 0.768 | 0.323 | 5.31E-18 | Macrophage: Pnp      |
| 3.81E-22 | 0.63533424 | 0.545 | 0.169 | 5.40E-18 | Macrophage: Il10rb   |
| 3.99E-22 | 0.67556172 | 0.535 | 0.166 | 5.65E-18 | Macrophage: Evi2a    |
| 4.43E-22 | -6.053879  | 0.04  | 0.562 | 6.27E-18 | Macrophage: Ccl5     |
| 4.77E-22 | 0.77925792 | 0.475 | 0.137 | 6.76E-18 | Macrophage: Rnf13    |
| 5.53E-22 | 0.27036222 | 0.859 | 0.304 | 7.82E-18 | Macrophage: Ifitm2   |
| 6.77E-22 | 0.50307831 | 0.242 | 0.043 | 9.58E-18 | Macrophage: Arl11    |
| 7.13E-22 | 0.36901663 | 0.192 | 0.028 | 1.01E-17 | Macrophage: P2rx7    |
| 8.04E-22 | 0.49074634 | 0.293 | 0.059 | 1.14E-17 | Macrophage: Igsf8    |
| 8.41E-22 | 0.83553882 | 0.444 | 0.123 | 1.19E-17 | Macrophage: Ppp1r10  |
| 8.57E-22 | -1.0112387 | 0.99  | 0.92  | 1.21E-17 | Macrophage: Rpl19    |
| 9.71E-22 | 0.38209898 | 0.152 | 0.018 | 1.38E-17 | Macrophage: Sord     |
| 1.00E-21 | 0.43061921 | 0.242 | 0.043 | 1.42E-17 | Macrophage: Vwa5a    |
| 1.06E-21 | 0.33307614 | 0.172 | 0.022 | 1.50E-17 | Macrophage: Tle1     |
| 1.20E-21 | 0.62401987 | 0.465 | 0.132 | 1.70E-17 | Macrophage: Dstn     |
| 1.22E-21 | 2.11526806 | 0.525 | 0.179 | 1.73E-17 | Macrophage: Phlda1   |
| 1.27E-21 | 0.28293397 | 0.121 | 0.012 | 1.80E-17 | Macrophage: Agap1    |
| 1.33E-21 | 0.61358334 | 0.333 | 0.074 | 1.89E-17 | Macrophage: Klf7     |
| 1.41E-21 | 0.89663442 | 0.485 | 0.143 | 2.00E-17 | Macrophage: Mdm2     |
| 1.66E-21 | 0.60800062 | 0.515 | 0.158 | 2.35E-17 | Macrophage: Skap2    |
| 1.97E-21 | 1.06314044 | 0.232 | 0.039 | 2.79E-17 | Macrophage: Ccl7     |
| 2.24E-21 | 0.88221546 | 0.475 | 0.141 | 3.17E-17 | Macrophage: Clec12a  |
| 2.27E-21 | 0.58042592 | 0.394 | 0.097 | 3.21E-17 | Macrophage: Rap1gds1 |
| 2.70E-21 | 0.4495287  | 0.313 | 0.067 | 3.83E-17 | Macrophage: Arhgap18 |
| 2.71E-21 | 0.52936083 | 0.434 | 0.115 | 3.83E-17 | Macrophage: Vps26a   |
| 2.85E-21 | 1.41039547 | 0.939 | 0.635 | 4.04E-17 | Macrophage: Klf2     |
| 3.36E-21 | 0.45276803 | 0.273 | 0.054 | 4.75E-17 | Macrophage: Myof     |
| 3.58E-21 | 0.89107839 | 0.798 | 0.334 | 5.06E-17 | Macrophage: mt-Nd3   |
| 3.81E-21 | 0.6664335  | 0.192 | 0.029 | 5.40E-17 | Macrophage: Mt2      |
| 4.50E-21 | 0.75356797 | 0.404 | 0.109 | 6.38E-17 | Macrophage: Fam129a  |
| 4.83E-21 | 0.27098783 | 0.111 | 0.01  | 6.83E-17 | Macrophage: Itga9    |
| 6.40E-21 | -1.754539  | 0.606 | 0.801 | 9.06E-17 | Macrophage: Rac2     |
| 6.75E-21 | 0.30674163 | 0.121 | 0.012 | 9.55E-17 | Macrophage: P2ry12   |
| 7.60E-21 | 0.7212066  | 0.364 | 0.092 | 1.08E-16 | Macrophage: Prdx4    |
| 8.91E-21 | 0.52325019 | 0.232 | 0.041 | 1.26E-16 | Macrophage: Glb1     |
| 1.03E-20 | 0.64848016 | 0.313 | 0.07  | 1.45E-16 | Macrophage: Acvrl1   |
| 1.09E-20 | 0.8576258  | 0.566 | 0.196 | 1.55E-16 | Macrophage: Atp6ap2  |
| 1.24E-20 | 0.40241658 | 0.212 | 0.035 | 1.76E-16 | Macrophage: Plscr3   |
| 1.37E-20 | 0.99166218 | 0.667 | 0.239 | 1.94E-16 | Macrophage: H2-DMb1  |
| 1.61E-20 | 0.86057782 | 0.828 | 0.354 | 2.28E-16 | Macrophage: Ctsz     |
| 2.11E-20 | 0.53788124 | 0.222 | 0.038 | 2.99E-16 | Macrophage: Sowahc   |

|          |            |       |       |          |                        |
|----------|------------|-------|-------|----------|------------------------|
| 2.22E-20 | -1.0051096 | 0.97  | 0.92  | 3.15E-16 | Macrophage: Rpl18      |
| 2.47E-20 | 0.59876938 | 0.293 | 0.063 | 3.49E-16 | Macrophage: Fam234a    |
| 2.58E-20 | 0.5678861  | 0.828 | 0.321 | 3.65E-16 | Macrophage: Spi1       |
| 3.35E-20 | -1.2649429 | 0.99  | 0.912 | 4.74E-16 | Macrophage: Rps15a     |
| 3.74E-20 | -1.6261688 | 0.636 | 0.799 | 5.30E-16 | Macrophage: Sub1       |
| 4.37E-20 | 0.95116147 | 0.99  | 0.68  | 6.18E-16 | Macrophage: Gpx1       |
| 5.13E-20 | 0.40884917 | 0.222 | 0.038 | 7.26E-16 | Macrophage: Plekhg3    |
| 7.33E-20 | -0.9556176 | 1     | 0.943 | 1.04E-15 | Macrophage: Uba52      |
| 8.93E-20 | 0.5025726  | 0.323 | 0.075 | 1.26E-15 | Macrophage: Ppp1r21    |
| 9.23E-20 | 0.50745525 | 0.242 | 0.046 | 1.31E-15 | Macrophage: Idh1       |
| 9.88E-20 | -1.2848585 | 0.889 | 0.917 | 1.40E-15 | Macrophage: Cd52       |
| 1.15E-19 | 0.49667185 | 0.465 | 0.134 | 1.63E-15 | Macrophage: Cd300a     |
| 1.17E-19 | 0.69431235 | 0.414 | 0.114 | 1.66E-15 | Macrophage: Fcgr1      |
| 1.37E-19 | 0.87432558 | 0.677 | 0.279 | 1.93E-15 | Macrophage: Ddx3x      |
| 1.50E-19 | 0.28273053 | 0.131 | 0.015 | 2.12E-15 | Macrophage: Ctnnd1     |
| 2.56E-19 | 0.67320349 | 0.394 | 0.109 | 3.63E-15 | Macrophage: Dok2       |
| 2.76E-19 | 0.7205388  | 0.636 | 0.235 | 3.91E-15 | Macrophage: Nrros      |
| 2.95E-19 | -1.0134874 | 0.939 | 0.901 | 4.18E-15 | Macrophage: Rpl8       |
| 3.04E-19 | 0.71091642 | 0.434 | 0.13  | 4.31E-15 | Macrophage: Ptpa       |
| 3.35E-19 | 0.37962219 | 0.232 | 0.044 | 4.74E-15 | Macrophage: Shtn1      |
| 3.92E-19 | 0.42865396 | 0.162 | 0.023 | 5.54E-15 | Macrophage: Parvb      |
| 3.93E-19 | 0.54538681 | 0.515 | 0.162 | 5.56E-15 | Macrophage: Rnf130     |
| 4.02E-19 | -3.8917426 | 0.141 | 0.573 | 5.68E-15 | Macrophage: AW112010   |
| 4.36E-19 | 0.48691582 | 0.242 | 0.048 | 6.17E-15 | Macrophage: Pak1       |
| 4.56E-19 | 0.28844852 | 0.111 | 0.011 | 6.46E-15 | Macrophage: Zdhhc14    |
| 4.83E-19 | 0.77746576 | 0.909 | 0.567 | 6.83E-15 | Macrophage: Cebpb      |
| 5.58E-19 | 0.29932364 | 0.192 | 0.031 | 7.90E-15 | Macrophage: Mertk      |
| 5.58E-19 | -0.9441723 | 1     | 0.936 | 7.91E-15 | Macrophage: Rpl18a     |
| 5.98E-19 | -2.3096493 | 0.071 | 0.534 | 8.46E-15 | Macrophage: Ptprcap    |
| 6.42E-19 | 0.88136007 | 0.404 | 0.118 | 9.09E-15 | Macrophage: Casp4      |
| 7.31E-19 | 0.6631987  | 0.525 | 0.178 | 1.03E-14 | Macrophage: Nckap1l    |
| 8.78E-19 | 0.51382125 | 0.354 | 0.091 | 1.24E-14 | Macrophage: Anxa4      |
| 9.74E-19 | 0.66135221 | 0.455 | 0.138 | 1.38E-14 | Macrophage: Lair1      |
| 1.17E-18 | 0.26424288 | 0.121 | 0.013 | 1.65E-14 | Macrophage: Ston2      |
| 1.19E-18 | 0.93541562 | 0.667 | 0.295 | 1.68E-14 | Macrophage: Man2b1     |
| 1.20E-18 | 0.56349064 | 0.384 | 0.104 | 1.70E-14 | Macrophage: Fgd2       |
| 1.26E-18 | 0.48663583 | 0.677 | 0.254 | 1.78E-14 | Macrophage: Tpd52      |
| 1.55E-18 | 0.50780276 | 0.222 | 0.042 | 2.19E-14 | Macrophage: Msr1       |
| 1.78E-18 | 0.49776721 | 0.616 | 0.22  | 2.52E-14 | Macrophage: Tnfrsf1a   |
| 1.90E-18 | 0.5174557  | 0.404 | 0.112 | 2.69E-14 | Macrophage: D1Ertd622e |
| 2.30E-18 | 0.92816259 | 0.838 | 0.463 | 3.25E-14 | Macrophage: Mcl1       |
| 2.61E-18 | 0.75955541 | 0.354 | 0.095 | 3.69E-14 | Macrophage: Rab20      |
| 2.63E-18 | 0.28713058 | 0.101 | 0.01  | 3.73E-14 | Macrophage: Slc13a3    |
| 2.75E-18 | 1.11249938 | 0.475 | 0.159 | 3.90E-14 | Macrophage: Chka       |
| 3.39E-18 | -0.9148487 | 0.949 | 0.917 | 4.80E-14 | Macrophage: Rpl9-ps6   |
| 3.97E-18 | 0.47568422 | 0.232 | 0.045 | 5.62E-14 | Macrophage: Siglece    |
| 4.30E-18 | 0.36581481 | 0.152 | 0.021 | 6.09E-14 | Macrophage: Slc35f5    |
| 4.41E-18 | -1.2378862 | 0.828 | 0.834 | 6.25E-14 | Macrophage: Arhgdib    |

|          |            |       |       |          |                     |
|----------|------------|-------|-------|----------|---------------------|
| 5.59E-18 | 0.41491323 | 0.99  | 0.433 | 7.91E-14 | Macrophage: Tyrobp  |
| 5.67E-18 | -1.0724007 | 0.96  | 0.903 | 8.03E-14 | Macrophage: Rps7    |
| 5.88E-18 | 0.67257741 | 0.606 | 0.231 | 8.33E-14 | Macrophage: Vsir    |
| 6.04E-18 | 0.3586512  | 0.162 | 0.024 | 8.56E-14 | Macrophage: Inpp1   |
| 7.11E-18 | 0.47039817 | 0.273 | 0.06  | 1.01E-13 | Macrophage: Slc9a9  |
| 1.06E-17 | 0.91519398 | 1     | 0.845 | 1.50E-13 | Macrophage: mt-Nd4l |
| 1.14E-17 | 0.65682853 | 0.929 | 0.55  | 1.61E-13 | Macrophage: Ctss    |
| 1.29E-17 | 0.45285768 | 0.192 | 0.034 | 1.83E-13 | Macrophage: Eng     |
| 1.69E-17 | 0.55063422 | 0.394 | 0.114 | 2.40E-13 | Macrophage: Eps15   |
| 1.70E-17 | -1.0511494 | 0.98  | 0.929 | 2.40E-13 | Macrophage: Rplp0   |
| 1.86E-17 | 0.55034695 | 0.323 | 0.084 | 2.63E-13 | Macrophage: Ebi3    |
| 1.95E-17 | -0.9533754 | 0.98  | 0.92  | 2.75E-13 | Macrophage: Rps2    |
| 1.99E-17 | 0.33312583 | 0.111 | 0.012 | 2.82E-13 | Macrophage: Fnbp1l  |
| 2.37E-17 | 0.72005769 | 0.525 | 0.187 | 3.36E-13 | Macrophage: Cd86    |
| 2.45E-17 | 0.73785496 | 0.788 | 0.355 | 3.47E-13 | Macrophage: Atpif1  |
| 2.50E-17 | 0.49193244 | 0.313 | 0.078 | 3.54E-13 | Macrophage: Tcn2    |
| 2.68E-17 | 0.48944752 | 0.202 | 0.037 | 3.79E-13 | Macrophage: Dst     |
| 2.85E-17 | 0.48003268 | 0.626 | 0.22  | 4.03E-13 | Macrophage: Ms4a6c  |
| 2.90E-17 | 0.46304838 | 0.222 | 0.045 | 4.10E-13 | Macrophage: Ubtd1   |
| 3.22E-17 | -0.9137253 | 1     | 0.928 | 4.56E-13 | Macrophage: Rps3a1  |
| 3.29E-17 | -0.8490234 | 1     | 0.94  | 4.65E-13 | Macrophage: Rps8    |
| 3.45E-17 | 0.51806188 | 0.343 | 0.092 | 4.89E-13 | Macrophage: Ski     |
| 3.58E-17 | 0.37774129 | 0.172 | 0.028 | 5.07E-13 | Macrophage: Tdrd7   |
| 4.12E-17 | -1.1054697 | 0.949 | 0.883 | 5.83E-13 | Macrophage: Rpl13a  |
| 4.17E-17 | 0.47669719 | 0.232 | 0.047 | 5.90E-13 | Macrophage: Acox1   |
| 4.91E-17 | 0.73908567 | 1     | 0.957 | 6.95E-13 | Macrophage: Fth1    |
| 4.92E-17 | -4.1804895 | 0.03  | 0.469 | 6.97E-13 | Macrophage: Nkg7    |
| 5.38E-17 | 0.63457951 | 0.556 | 0.196 | 7.61E-13 | Macrophage: Aldh2   |
| 5.51E-17 | 0.45871677 | 0.404 | 0.118 | 7.79E-13 | Macrophage: Ptprij  |
| 5.51E-17 | 0.58951414 | 0.283 | 0.067 | 7.80E-13 | Macrophage: Zfp703  |
| 6.13E-17 | 0.40235415 | 0.273 | 0.064 | 8.68E-13 | Macrophage: Rbm47   |
| 6.33E-17 | 0.44959922 | 0.222 | 0.045 | 8.96E-13 | Macrophage: Zfp385a |
| 6.60E-17 | 0.70738812 | 0.323 | 0.085 | 9.35E-13 | Macrophage: Arf2    |
| 6.99E-17 | 0.69530983 | 0.626 | 0.238 | 9.90E-13 | Macrophage: Wfdc17  |
| 7.48E-17 | 0.52703638 | 0.384 | 0.114 | 1.06E-12 | Macrophage: Ehbp1l1 |
| 7.72E-17 | 0.45958383 | 0.172 | 0.028 | 1.09E-12 | Macrophage: Sulf2   |
| 9.09E-17 | -0.804873  | 1     | 0.937 | 1.29E-12 | Macrophage: Rpl13   |
| 1.00E-16 | 0.45179686 | 0.495 | 0.164 | 1.42E-12 | Macrophage: Cmtm6   |
| 1.14E-16 | -0.8804355 | 0.98  | 0.905 | 1.61E-12 | Macrophage: Rps3    |
| 1.16E-16 | -0.837228  | 1     | 0.941 | 1.64E-12 | Macrophage: Rps16   |
| 1.30E-16 | 0.54329821 | 0.99  | 0.417 | 1.85E-12 | Macrophage: Fcer1g  |
| 1.34E-16 | 0.99444565 | 0.697 | 0.34  | 1.89E-12 | Macrophage: Zfand5  |
| 1.46E-16 | 0.45651536 | 0.343 | 0.095 | 2.06E-12 | Macrophage: Tspan31 |
| 1.48E-16 | 0.5967739  | 0.394 | 0.116 | 2.09E-12 | Macrophage: Ms4a4a  |
| 1.48E-16 | 0.54654963 | 0.434 | 0.141 | 2.10E-12 | Macrophage: Rsu1    |
| 1.53E-16 | 0.96768788 | 0.909 | 0.708 | 2.17E-12 | Macrophage: Btg2    |
| 1.59E-16 | 0.49518612 | 0.354 | 0.097 | 2.26E-12 | Macrophage: Tmcc1   |
| 1.91E-16 | 1.00102763 | 0.404 | 0.129 | 2.71E-12 | Macrophage: Errfi1  |

|          |            |       |       |          |                         |
|----------|------------|-------|-------|----------|-------------------------|
| 1.96E-16 | 0.5012588  | 0.333 | 0.09  | 2.78E-12 | Macrophage: Etv3        |
| 2.06E-16 | 0.48543662 | 0.444 | 0.14  | 2.92E-12 | Macrophage: Il6ra       |
| 2.35E-16 | 0.55603513 | 0.202 | 0.039 | 3.33E-12 | Macrophage: 4930430E12F |
| 2.55E-16 | 0.39101159 | 0.323 | 0.084 | 3.60E-12 | Macrophage: 5031439G07I |
| 2.56E-16 | 0.40116804 | 0.313 | 0.081 | 3.63E-12 | Macrophage: Dennd5a     |
| 2.78E-16 | 0.98128578 | 0.99  | 0.872 | 3.93E-12 | Macrophage: Hspa8       |
| 2.83E-16 | 0.42699197 | 0.434 | 0.135 | 4.00E-12 | Macrophage: BC028528    |
| 2.99E-16 | 0.47272448 | 0.172 | 0.029 | 4.23E-12 | Macrophage: Pdgfb       |
| 3.24E-16 | 0.69503034 | 0.556 | 0.207 | 4.58E-12 | Macrophage: Herpud1     |
| 3.44E-16 | 0.8577228  | 0.687 | 0.304 | 4.87E-12 | Macrophage: Mat2a       |
| 3.58E-16 | 0.79002662 | 0.687 | 0.301 | 5.06E-12 | Macrophage: Cyth4       |
| 3.59E-16 | 0.52480863 | 0.374 | 0.112 | 5.09E-12 | Macrophage: Camk1d      |
| 3.77E-16 | 0.46035459 | 0.455 | 0.15  | 5.33E-12 | Macrophage: Tcirg1      |
| 3.89E-16 | 0.31880494 | 0.263 | 0.059 | 5.51E-12 | Macrophage: Gstm1       |
| 4.17E-16 | 0.38372191 | 0.242 | 0.054 | 5.90E-12 | Macrophage: Slc29a3     |
| 4.39E-16 | 0.42455504 | 0.343 | 0.094 | 6.21E-12 | Macrophage: Qk          |
| 4.39E-16 | 0.66232451 | 0.596 | 0.24  | 6.21E-12 | Macrophage: Hmox2       |
| 4.48E-16 | 0.41285882 | 0.222 | 0.046 | 6.34E-12 | Macrophage: Ly96        |
| 4.60E-16 | 0.52974028 | 0.313 | 0.084 | 6.51E-12 | Macrophage: Sec14l1     |
| 4.81E-16 | 0.36976591 | 0.162 | 0.026 | 6.81E-12 | Macrophage: Tlr4        |
| 5.26E-16 | -1.6164344 | 0.313 | 0.644 | 7.45E-12 | Macrophage: Limd2       |
| 5.29E-16 | 0.31149584 | 0.141 | 0.021 | 7.49E-12 | Macrophage: Il11ra1     |
| 6.62E-16 | -0.6145087 | 1     | 0.98  | 9.38E-12 | Macrophage: Fau         |
| 6.63E-16 | -0.9010865 | 0.949 | 0.859 | 9.38E-12 | Macrophage: Rpl27       |
| 7.47E-16 | 0.86244407 | 0.929 | 0.646 | 1.06E-11 | Macrophage: Hspa5       |
| 7.91E-16 | 0.54270339 | 0.606 | 0.233 | 1.12E-11 | Macrophage: Prkcd       |
| 8.32E-16 | 0.40659416 | 0.192 | 0.037 | 1.18E-11 | Macrophage: Tspan4      |
| 8.68E-16 | 0.4479185  | 0.323 | 0.087 | 1.23E-11 | Macrophage: Dnajc13     |
| 9.59E-16 | 0.52650537 | 0.657 | 0.272 | 1.36E-11 | Macrophage: Canx        |
| 9.93E-16 | -0.7709088 | 0.96  | 0.948 | 1.41E-11 | Macrophage: Gm10076     |
| 1.03E-15 | 0.70873214 | 0.455 | 0.149 | 1.46E-11 | Macrophage: Plk2        |
| 1.21E-15 | 0.71552522 | 0.667 | 0.295 | 1.71E-11 | Macrophage: Nfe2l2      |
| 1.33E-15 | 0.54909732 | 0.354 | 0.102 | 1.88E-11 | Macrophage: Tgfbr1      |
| 1.40E-15 | 0.51436273 | 0.394 | 0.123 | 1.98E-11 | Macrophage: Ncstn       |
| 1.64E-15 | -0.8293252 | 0.97  | 0.921 | 2.32E-11 | Macrophage: Rpl30       |
| 1.67E-15 | 0.52426662 | 0.222 | 0.049 | 2.36E-11 | Macrophage: Renbp       |
| 1.86E-15 | 0.4085052  | 0.404 | 0.125 | 2.64E-11 | Macrophage: Cd300ld     |
| 1.98E-15 | 0.39140936 | 0.182 | 0.034 | 2.81E-11 | Macrophage: Manba       |
| 2.01E-15 | 0.57946528 | 0.273 | 0.069 | 2.84E-11 | Macrophage: Pira2       |
| 2.09E-15 | 0.46414418 | 0.222 | 0.048 | 2.96E-11 | Macrophage: Dbn1d2      |
| 2.54E-15 | 0.67197284 | 0.758 | 0.36  | 3.59E-11 | Macrophage: Capza2      |
| 3.23E-15 | 0.446273   | 0.263 | 0.062 | 4.57E-11 | Macrophage: Abca1       |
| 3.24E-15 | 0.53086905 | 0.354 | 0.104 | 4.59E-11 | Macrophage: Irf2bp2     |
| 3.81E-15 | 0.33364639 | 0.152 | 0.025 | 5.40E-11 | Macrophage: Tmem141     |
| 3.87E-15 | 0.43200197 | 0.141 | 0.022 | 5.47E-11 | Macrophage: Tceal8      |
| 4.16E-15 | 0.27491667 | 0.152 | 0.025 | 5.88E-11 | Macrophage: Pparg       |
| 4.58E-15 | 0.34037023 | 0.101 | 0.012 | 6.48E-11 | Macrophage: Disc1       |
| 4.78E-15 | 0.26408114 | 0.131 | 0.019 | 6.76E-11 | Macrophage: Gm20481     |



|          |            |       |       |          |                      |
|----------|------------|-------|-------|----------|----------------------|
| 4.81E-15 | 0.44036997 | 0.333 | 0.097 | 6.81E-11 | Macrophage: Tmem109  |
| 5.04E-15 | 0.40261681 | 0.293 | 0.077 | 7.13E-11 | Macrophage: Cep170   |
| 5.87E-15 | 0.31463916 | 0.182 | 0.034 | 8.31E-11 | Macrophage: Zmynd15  |
| 6.91E-15 | 0.48737435 | 0.414 | 0.138 | 9.79E-11 | Macrophage: Atp6v1a  |
| 7.21E-15 | 0.56707519 | 0.404 | 0.135 | 1.02E-10 | Macrophage: Mpp1     |
| 7.30E-15 | 0.44240296 | 0.273 | 0.069 | 1.03E-10 | Macrophage: Hgsnat   |
| 7.63E-15 | 0.53730317 | 0.242 | 0.056 | 1.08E-10 | Macrophage: Itga6    |
| 7.97E-15 | 0.28029376 | 0.646 | 0.255 | 1.13E-10 | Macrophage: Ncf2     |
| 8.59E-15 | 0.41199355 | 0.343 | 0.102 | 1.22E-10 | Macrophage: Mapk3    |
| 8.60E-15 | 0.59486909 | 0.354 | 0.11  | 1.22E-10 | Macrophage: Ap2a2    |
| 9.59E-15 | 0.37994122 | 0.303 | 0.082 | 1.36E-10 | Macrophage: Abcb1b   |
| 1.07E-14 | 0.78272751 | 0.455 | 0.169 | 1.51E-10 | Macrophage: Nop58    |
| 1.08E-14 | 0.30996981 | 0.152 | 0.025 | 1.53E-10 | Macrophage: Evi5     |
| 1.08E-14 | -3.0113317 | 0.051 | 0.444 | 1.53E-10 | Macrophage: Cd3g     |
| 1.16E-14 | 0.40546779 | 0.263 | 0.066 | 1.64E-10 | Macrophage: Pisd     |
| 1.18E-14 | 0.46654045 | 0.424 | 0.14  | 1.67E-10 | Macrophage: Ncoa3    |
| 1.20E-14 | -1.9861213 | 0.101 | 0.482 | 1.70E-10 | Macrophage: Cd2      |
| 1.28E-14 | 0.45403547 | 0.535 | 0.205 | 1.81E-10 | Macrophage: Creg1    |
| 1.35E-14 | 0.2614847  | 0.455 | 0.153 | 1.92E-10 | Macrophage: Snap23   |
| 1.38E-14 | 0.43714885 | 0.222 | 0.05  | 1.95E-10 | Macrophage: Rreb1    |
| 1.42E-14 | 0.51996315 | 0.303 | 0.085 | 2.00E-10 | Macrophage: Slc29a1  |
| 1.44E-14 | 0.52941664 | 0.303 | 0.086 | 2.04E-10 | Macrophage: Tep1     |
| 1.72E-14 | 0.52948235 | 0.475 | 0.169 | 2.43E-10 | Macrophage: Stx7     |
| 1.76E-14 | 0.55661904 | 0.394 | 0.129 | 2.49E-10 | Macrophage: Map3k8   |
| 1.78E-14 | -0.7965542 | 0.96  | 0.915 | 2.52E-10 | Macrophage: Rps10    |
| 1.81E-14 | 0.53778415 | 0.566 | 0.231 | 2.56E-10 | Macrophage: Taok3    |
| 1.98E-14 | 0.52036295 | 0.606 | 0.253 | 2.80E-10 | Macrophage: Gltf     |
| 2.01E-14 | 0.59207342 | 0.646 | 0.284 | 2.84E-10 | Macrophage: Kdm6b    |
| 2.05E-14 | 0.42404971 | 0.283 | 0.075 | 2.90E-10 | Macrophage: Tbc1d9b  |
| 2.25E-14 | 0.31754022 | 0.263 | 0.065 | 3.19E-10 | Macrophage: Ncln     |
| 2.29E-14 | -0.7320882 | 0.99  | 0.911 | 3.24E-10 | Macrophage: Rpl6     |
| 3.07E-14 | 0.3786781  | 0.232 | 0.054 | 4.34E-10 | Macrophage: Plod1    |
| 3.08E-14 | 0.36309401 | 0.293 | 0.08  | 4.37E-10 | Macrophage: Rcbtb2   |
| 3.10E-14 | 0.64877615 | 0.758 | 0.378 | 4.39E-10 | Macrophage: Snx5     |
| 3.42E-14 | 0.39839982 | 0.202 | 0.043 | 4.84E-10 | Macrophage: Gab2     |
| 3.49E-14 | 0.85346887 | 0.535 | 0.227 | 4.94E-10 | Macrophage: Gm26532  |
| 3.49E-14 | 0.30423592 | 0.162 | 0.029 | 4.94E-10 | Macrophage: Il15     |
| 3.58E-14 | -1.904464  | 0.101 | 0.482 | 5.07E-10 | Macrophage: Ltb      |
| 3.97E-14 | 0.40244772 | 0.111 | 0.015 | 5.62E-10 | Macrophage: Tmem119  |
| 4.08E-14 | -2.6184593 | 0.081 | 0.465 | 5.78E-10 | Macrophage: Ly6a     |
| 4.08E-14 | 0.33189036 | 0.141 | 0.023 | 5.78E-10 | Macrophage: Hlx      |
| 5.48E-14 | 0.50945831 | 0.535 | 0.21  | 7.76E-10 | Macrophage: Plekho2  |
| 5.60E-14 | 0.34199167 | 0.131 | 0.02  | 7.93E-10 | Macrophage: Nfxl1    |
| 5.87E-14 | 0.45633894 | 0.182 | 0.037 | 8.30E-10 | Macrophage: Mitf     |
| 6.14E-14 | -0.6850706 | 0.98  | 0.909 | 8.69E-10 | Macrophage: Rpl11    |
| 6.22E-14 | 0.25432633 | 0.141 | 0.023 | 8.80E-10 | Macrophage: Slc35e4  |
| 7.06E-14 | 0.40771308 | 0.253 | 0.063 | 9.99E-10 | Macrophage: Nab2     |
| 7.49E-14 | 0.3512728  | 0.121 | 0.018 | 1.06E-09 | Macrophage: Itpripl1 |

|          |            |       |       |          |                     |
|----------|------------|-------|-------|----------|---------------------|
| 8.34E-14 | 1.11996866 | 0.828 | 0.526 | 1.18E-09 | Macrophage: Dnajb1  |
| 8.47E-14 | -1.494485  | 0.313 | 0.62  | 1.20E-09 | Macrophage: Il2rg   |
| 1.11E-13 | 0.37160238 | 0.273 | 0.073 | 1.57E-09 | Macrophage: Map3k11 |
| 1.14E-13 | 0.75384443 | 0.929 | 0.659 | 1.61E-09 | Macrophage: Atp6v0c |
| 1.20E-13 | 0.45161158 | 0.505 | 0.194 | 1.70E-09 | Macrophage: Picalm  |
| 1.21E-13 | 0.49279152 | 0.293 | 0.084 | 1.72E-09 | Macrophage: Phf23   |
| 1.22E-13 | 0.51589609 | 0.424 | 0.151 | 1.72E-09 | Macrophage: Map7d1  |
| 1.29E-13 | 0.43110604 | 0.222 | 0.052 | 1.83E-09 | Macrophage: Diaph2  |
| 1.32E-13 | 0.42465304 | 0.111 | 0.016 | 1.86E-09 | Macrophage: Ch25h   |
| 1.38E-13 | 0.63934174 | 0.414 | 0.145 | 1.95E-09 | Macrophage: Sccep1  |
| 1.48E-13 | -0.968218  | 0.99  | 0.901 | 2.10E-09 | Macrophage: Rps20   |
| 1.52E-13 | 0.59684124 | 0.556 | 0.237 | 2.16E-09 | Macrophage: Nptn    |
| 1.70E-13 | 0.45351837 | 0.485 | 0.182 | 2.40E-09 | Macrophage: Vmp1    |
| 1.79E-13 | 0.38455487 | 0.313 | 0.091 | 2.54E-09 | Macrophage: Atp13a2 |
| 2.06E-13 | 0.55205978 | 0.232 | 0.058 | 2.91E-09 | Macrophage: Tom1    |
| 2.06E-13 | -1.6347475 | 0.192 | 0.571 | 2.92E-09 | Macrophage: Vps37b  |
| 2.09E-13 | 0.35351165 | 0.212 | 0.049 | 2.96E-09 | Macrophage: Vps37c  |
| 2.18E-13 | 0.44864624 | 0.354 | 0.111 | 3.09E-09 | Macrophage: Itgam   |
| 2.24E-13 | -0.6563599 | 1     | 0.933 | 3.18E-09 | Macrophage: Rps27a  |
| 2.33E-13 | 0.32904113 | 0.152 | 0.027 | 3.30E-09 | Macrophage: Nckipsd |
| 2.47E-13 | -2.595166  | 0.051 | 0.412 | 3.49E-09 | Macrophage: Cd3d    |
| 2.50E-13 | 0.30530039 | 0.172 | 0.034 | 3.54E-09 | Macrophage: Klf11   |
| 2.56E-13 | 0.32657014 | 0.283 | 0.078 | 3.63E-09 | Macrophage: Ctla2b  |
| 2.66E-13 | 0.61761549 | 0.788 | 0.416 | 3.76E-09 | Macrophage: Ccnl1   |
| 2.79E-13 | -2.6078219 | 0.101 | 0.457 | 3.94E-09 | Macrophage: Ms4a4b  |
| 2.92E-13 | 0.31713301 | 0.141 | 0.024 | 4.13E-09 | Macrophage: Mmp19   |
| 3.37E-13 | 0.28673332 | 0.273 | 0.074 | 4.78E-09 | Macrophage: Stx12   |
| 3.44E-13 | 0.48905345 | 0.283 | 0.081 | 4.87E-09 | Macrophage: Htra2   |
| 3.48E-13 | 0.46400254 | 0.202 | 0.046 | 4.92E-09 | Macrophage: Pmepa1  |
| 3.69E-13 | 0.54510255 | 0.434 | 0.159 | 5.23E-09 | Macrophage: Sbno2   |
| 3.89E-13 | 0.47789819 | 0.263 | 0.073 | 5.51E-09 | Macrophage: S100a1  |
| 4.32E-13 | 0.41053494 | 0.222 | 0.054 | 6.12E-09 | Macrophage: Itga5   |
| 4.44E-13 | -2.2980314 | 0.03  | 0.39  | 6.28E-09 | Macrophage: Pglyrp1 |
| 4.44E-13 | 0.41363382 | 0.232 | 0.058 | 6.29E-09 | Macrophage: Pfkfb4  |
| 4.56E-13 | 1.12236121 | 0.929 | 0.641 | 6.46E-09 | Macrophage: Cd74    |
| 4.59E-13 | 0.71981867 | 0.475 | 0.184 | 6.50E-09 | Macrophage: Cd72    |
| 4.87E-13 | 0.29902869 | 0.232 | 0.058 | 6.90E-09 | Macrophage: Bcl2l1  |
| 4.91E-13 | -1.6512045 | 0.071 | 0.429 | 6.96E-09 | Macrophage: 1-Sep   |
| 5.01E-13 | 0.27572049 | 0.172 | 0.035 | 7.09E-09 | Macrophage: Tnfaip1 |
| 5.02E-13 | -1.2433294 | 0.737 | 0.827 | 7.11E-09 | Macrophage: Ly6e    |
| 5.12E-13 | 0.6745948  | 0.778 | 0.427 | 7.25E-09 | Macrophage: Plek    |
| 5.40E-13 | -0.6969675 | 0.99  | 0.914 | 7.65E-09 | Macrophage: Rps11   |
| 5.48E-13 | 0.29746971 | 0.152 | 0.028 | 7.76E-09 | Macrophage: Clec10a |
| 5.52E-13 | 1.28343694 | 0.818 | 0.534 | 7.82E-09 | Macrophage: Sqstm1  |
| 5.85E-13 | 0.31647698 | 0.222 | 0.055 | 8.28E-09 | Macrophage: Ppfia4  |
| 6.30E-13 | 0.70425775 | 0.697 | 0.344 | 8.91E-09 | Macrophage: Efhd2   |
| 6.32E-13 | 0.54365957 | 0.162 | 0.032 | 8.95E-09 | Macrophage: Emp1    |
| 6.41E-13 | 0.3368251  | 0.303 | 0.089 | 9.07E-09 | Macrophage: Npepl1  |

|          |            |       |       |          |                      |
|----------|------------|-------|-------|----------|----------------------|
| 6.67E-13 | 0.46423739 | 0.515 | 0.199 | 9.44E-09 | Macrophage: Gns      |
| 6.68E-13 | 0.47571512 | 0.343 | 0.111 | 9.46E-09 | Macrophage: Gapvd1   |
| 6.85E-13 | 0.96930633 | 0.848 | 0.556 | 9.70E-09 | Macrophage: Zfp36l1  |
| 7.24E-13 | 0.52172332 | 0.323 | 0.102 | 1.02E-08 | Macrophage: Mafg     |
| 8.50E-13 | 0.37742421 | 0.202 | 0.047 | 1.20E-08 | Macrophage: Parp12   |
| 8.70E-13 | 0.42940772 | 0.242 | 0.064 | 1.23E-08 | Macrophage: Tmbim1   |
| 8.70E-13 | 0.47788215 | 0.202 | 0.047 | 1.23E-08 | Macrophage: Lipe     |
| 8.83E-13 | -0.8081724 | 1     | 0.939 | 1.25E-08 | Macrophage: Rps24    |
| 9.13E-13 | 0.65695563 | 0.384 | 0.14  | 1.29E-08 | Macrophage: Plekho1  |
| 9.28E-13 | 0.35562523 | 0.394 | 0.132 | 1.31E-08 | Macrophage: Relb     |
| 9.37E-13 | 0.33123687 | 0.182 | 0.039 | 1.33E-08 | Macrophage: Stom     |
| 9.79E-13 | 0.43171487 | 0.384 | 0.131 | 1.39E-08 | Macrophage: Ms4a6d   |
| 1.01E-12 | -0.8826858 | 0.919 | 0.916 | 1.42E-08 | Macrophage: H2-K1    |
| 1.02E-12 | 0.2539888  | 0.192 | 0.042 | 1.44E-08 | Macrophage: Abcc5    |
| 1.16E-12 | 0.57330366 | 0.848 | 0.466 | 1.64E-08 | Macrophage: Gdi2     |
| 1.16E-12 | -0.7959335 | 0.97  | 0.899 | 1.64E-08 | Macrophage: Rps26    |
| 1.23E-12 | 0.25522615 | 0.111 | 0.017 | 1.75E-08 | Macrophage: Abcd2    |
| 1.30E-12 | 0.33540823 | 0.242 | 0.063 | 1.84E-08 | Macrophage: Cyb5r1   |
| 1.31E-12 | 0.50156104 | 0.343 | 0.114 | 1.85E-08 | Macrophage: Oas1a    |
| 1.34E-12 | 0.3110961  | 0.434 | 0.159 | 1.90E-08 | Macrophage: Entpd1   |
| 1.38E-12 | 0.48428036 | 0.394 | 0.143 | 1.95E-08 | Macrophage: Comt     |
| 1.40E-12 | 0.29357399 | 0.202 | 0.046 | 1.99E-08 | Macrophage: Cass4    |
| 1.43E-12 | 0.4154685  | 0.525 | 0.211 | 2.02E-08 | Macrophage: Usf2     |
| 1.43E-12 | -2.3969704 | 0.061 | 0.412 | 2.02E-08 | Macrophage: Cd3e     |
| 1.66E-12 | 0.27730232 | 0.101 | 0.014 | 2.35E-08 | Macrophage: Ophn1    |
| 1.77E-12 | 0.43693066 | 0.253 | 0.069 | 2.51E-08 | Macrophage: Tifa     |
| 1.82E-12 | -0.6860331 | 1     | 0.906 | 2.58E-08 | Macrophage: Rpl34    |
| 1.86E-12 | 0.55504673 | 0.263 | 0.074 | 2.64E-08 | Macrophage: Tmcc3    |
| 1.92E-12 | 0.37186279 | 0.172 | 0.037 | 2.71E-08 | Macrophage: F11r     |
| 1.98E-12 | 0.30451178 | 0.283 | 0.081 | 2.80E-08 | Macrophage: Rb1      |
| 2.03E-12 | 0.39152697 | 0.192 | 0.045 | 2.87E-08 | Macrophage: Zfp467   |
| 2.08E-12 | 0.92823455 | 0.646 | 0.33  | 2.94E-08 | Macrophage: Cited2   |
| 2.16E-12 | 0.40703595 | 0.152 | 0.029 | 3.06E-08 | Macrophage: Gm10138  |
| 2.17E-12 | 0.40325777 | 0.444 | 0.169 | 3.07E-08 | Macrophage: Lgals3bp |
| 2.30E-12 | 0.3754907  | 0.182 | 0.04  | 3.25E-08 | Macrophage: Pvr      |
| 2.31E-12 | 0.40559431 | 0.222 | 0.056 | 3.27E-08 | Macrophage: Tlr7     |
| 2.49E-12 | 0.32306208 | 0.232 | 0.06  | 3.53E-08 | Macrophage: Slc8b1   |
| 2.57E-12 | 0.47364044 | 0.384 | 0.134 | 3.63E-08 | Macrophage: Cat      |
| 2.90E-12 | 0.35521695 | 0.222 | 0.056 | 4.11E-08 | Macrophage: Zswim6   |
| 2.97E-12 | 0.46000193 | 0.646 | 0.304 | 4.20E-08 | Macrophage: Atp1a1   |
| 2.98E-12 | 0.4278696  | 0.364 | 0.122 | 4.22E-08 | Macrophage: Arap1    |
| 3.18E-12 | 0.56001014 | 0.545 | 0.231 | 4.51E-08 | Macrophage: Atp6ap1  |
| 3.22E-12 | 0.56129634 | 0.354 | 0.119 | 4.56E-08 | Macrophage: P2rx4    |
| 3.24E-12 | 0.35110572 | 0.172 | 0.037 | 4.58E-08 | Macrophage: Stard9   |
| 4.02E-12 | 0.50192745 | 0.242 | 0.068 | 5.69E-08 | Macrophage: Milr1    |
| 4.02E-12 | 0.60326062 | 0.162 | 0.034 | 5.70E-08 | Macrophage: Rcan1    |
| 4.55E-12 | 0.4770972  | 0.707 | 0.328 | 6.44E-08 | Macrophage: Bst2     |
| 4.58E-12 | 0.36386762 | 0.222 | 0.057 | 6.49E-08 | Macrophage: Nkiras2  |

|          |            |       |       |          |                       |
|----------|------------|-------|-------|----------|-----------------------|
| 5.17E-12 | 0.55818837 | 0.667 | 0.336 | 7.32E-08 | Macrophage: Atp2b1    |
| 5.18E-12 | 0.31275777 | 0.172 | 0.037 | 7.33E-08 | Macrophage: Aph1c     |
| 5.22E-12 | 0.43985022 | 0.293 | 0.091 | 7.39E-08 | Macrophage: Pacsin2   |
| 5.23E-12 | 0.30799315 | 0.131 | 0.023 | 7.40E-08 | Macrophage: Pon3      |
| 6.54E-12 | 0.33110905 | 0.253 | 0.071 | 9.26E-08 | Macrophage: Frmd4b    |
| 6.59E-12 | 0.28449151 | 0.111 | 0.017 | 9.32E-08 | Macrophage: Nlrc4     |
| 7.02E-12 | 0.37890918 | 0.131 | 0.024 | 9.94E-08 | Macrophage: Nav1      |
| 7.23E-12 | -1.3220321 | 0.677 | 0.73  | 1.02E-07 | Macrophage: Shisa5    |
| 8.22E-12 | 0.40746422 | 0.444 | 0.171 | 1.16E-07 | Macrophage: Zmiz1     |
| 8.60E-12 | 0.28325056 | 0.232 | 0.062 | 1.22E-07 | Macrophage: Hk3       |
| 8.73E-12 | 0.32552099 | 0.465 | 0.176 | 1.24E-07 | Macrophage: Pirb      |
| 8.87E-12 | 0.98997827 | 0.939 | 0.723 | 1.26E-07 | Macrophage: Hsp90aa1  |
| 1.00E-11 | 2.20518543 | 0.192 | 0.048 | 1.42E-07 | Macrophage: Hspb1     |
| 1.18E-11 | 0.47362766 | 0.687 | 0.34  | 1.66E-07 | Macrophage: Tmem59    |
| 1.21E-11 | 0.53888637 | 0.576 | 0.255 | 1.71E-07 | Macrophage: Snx2      |
| 1.29E-11 | 0.46316059 | 0.333 | 0.114 | 1.83E-07 | Macrophage: Mvp       |
| 1.30E-11 | 0.27231141 | 0.152 | 0.03  | 1.84E-07 | Macrophage: Myo9a     |
| 1.40E-11 | 0.41637968 | 0.253 | 0.073 | 1.99E-07 | Macrophage: Baiap2    |
| 1.41E-11 | 0.53720426 | 0.525 | 0.228 | 1.99E-07 | Macrophage: Fuca1     |
| 1.41E-11 | 0.27132213 | 0.152 | 0.031 | 2.00E-07 | Macrophage: Tspan17   |
| 1.54E-11 | 0.55825329 | 0.424 | 0.166 | 2.18E-07 | Macrophage: Eif1a     |
| 1.77E-11 | 0.34050361 | 0.141 | 0.028 | 2.50E-07 | Macrophage: Fkbp1b    |
| 1.97E-11 | -1.9455471 | 0.02  | 0.346 | 2.79E-07 | Macrophage: Sh2d2a    |
| 2.01E-11 | 0.37920502 | 0.283 | 0.088 | 2.85E-07 | Macrophage: Ogfrl1    |
| 2.15E-11 | 0.5071165  | 0.293 | 0.094 | 3.05E-07 | Macrophage: Ube2e3    |
| 2.26E-11 | 0.42506165 | 0.475 | 0.189 | 3.20E-07 | Macrophage: Jmjd1c    |
| 2.35E-11 | 0.25937809 | 0.131 | 0.024 | 3.32E-07 | Macrophage: Dusp23    |
| 2.42E-11 | 0.50517542 | 0.354 | 0.129 | 3.43E-07 | Macrophage: Sap30     |
| 2.49E-11 | -0.5972339 | 0.99  | 0.937 | 3.52E-07 | Macrophage: Rpl23     |
| 2.57E-11 | 0.3406104  | 0.242 | 0.069 | 3.63E-07 | Macrophage: Dnajb14   |
| 2.58E-11 | 0.33615555 | 0.333 | 0.112 | 3.65E-07 | Macrophage: Pilra     |
| 2.64E-11 | 0.281792   | 0.101 | 0.015 | 3.74E-07 | Macrophage: Plxna4os1 |
| 2.70E-11 | 0.33217532 | 0.293 | 0.092 | 3.82E-07 | Macrophage: 2-Sep     |
| 2.83E-11 | 0.29120303 | 0.111 | 0.018 | 4.00E-07 | Macrophage: Gamt      |
| 3.35E-11 | 0.6116066  | 0.626 | 0.309 | 4.75E-07 | Macrophage: P4hb      |
| 3.45E-11 | -1.6554439 | 0.152 | 0.471 | 4.89E-07 | Macrophage: Ets1      |
| 3.58E-11 | 0.47124917 | 0.323 | 0.111 | 5.06E-07 | Macrophage: Colgalt1  |
| 3.68E-11 | 0.66233553 | 0.283 | 0.09  | 5.20E-07 | Macrophage: Zfand2a   |
| 3.85E-11 | 0.42620673 | 0.222 | 0.061 | 5.45E-07 | Macrophage: Mfsd11    |
| 3.95E-11 | 0.99202028 | 0.818 | 0.506 | 5.59E-07 | Macrophage: H2-Aa     |
| 4.22E-11 | 0.44055526 | 0.414 | 0.154 | 5.98E-07 | Macrophage: Man1a     |
| 4.50E-11 | 0.46300913 | 0.242 | 0.069 | 6.37E-07 | Macrophage: Vps18     |
| 4.56E-11 | 0.26524311 | 0.152 | 0.032 | 6.45E-07 | Macrophage: As3mt     |
| 4.97E-11 | 0.56145571 | 0.939 | 0.661 | 7.03E-07 | Macrophage: Rpl10     |
| 4.97E-11 | 0.94903917 | 0.818 | 0.49  | 7.04E-07 | Macrophage: H2-Ab1    |
| 5.02E-11 | -0.748997  | 0.919 | 0.85  | 7.11E-07 | Macrophage: Rpl15     |
| 5.18E-11 | 0.39263488 | 0.242 | 0.071 | 7.34E-07 | Macrophage: Uap111    |
| 5.21E-11 | 0.42318905 | 0.576 | 0.257 | 7.37E-07 | Macrophage: Tgfbr2    |

|          |            |       |       |          |                       |
|----------|------------|-------|-------|----------|-----------------------|
| 5.27E-11 | 0.38007338 | 0.232 | 0.066 | 7.47E-07 | Macrophage: Arl8a     |
| 5.29E-11 | 0.59457011 | 0.525 | 0.243 | 7.49E-07 | Macrophage: BC005537  |
| 5.34E-11 | 0.83802502 | 0.717 | 0.417 | 7.56E-07 | Macrophage: Irf1      |
| 5.86E-11 | -0.6896526 | 0.98  | 0.886 | 8.29E-07 | Macrophage: Rps13     |
| 6.06E-11 | 0.48291104 | 0.293 | 0.096 | 8.57E-07 | Macrophage: Bmyc      |
| 6.31E-11 | 0.25875667 | 0.141 | 0.029 | 8.93E-07 | Macrophage: Oas2      |
| 6.36E-11 | 0.67238199 | 0.485 | 0.213 | 9.00E-07 | Macrophage: Skil      |
| 7.02E-11 | 0.80248486 | 0.374 | 0.141 | 9.93E-07 | Macrophage: Rasgef1b  |
| 7.05E-11 | 0.463756   | 0.333 | 0.12  | 9.97E-07 | Macrophage: Nenf      |
| 7.19E-11 | -1.3906403 | 0.677 | 0.696 | 1.02E-06 | Macrophage: Psmb8     |
| 7.26E-11 | 0.33778383 | 0.121 | 0.022 | 1.03E-06 | Macrophage: Spg20     |
| 8.04E-11 | 0.56659421 | 0.485 | 0.215 | 1.14E-06 | Macrophage: Rab1a     |
| 8.14E-11 | 0.3959185  | 0.263 | 0.082 | 1.15E-06 | Macrophage: H1f0      |
| 8.20E-11 | 0.30616096 | 0.192 | 0.048 | 1.16E-06 | Macrophage: Lrp6      |
| 8.43E-11 | 0.31089999 | 0.283 | 0.086 | 1.19E-06 | Macrophage: Mtss1     |
| 9.71E-11 | 0.48070237 | 0.899 | 0.538 | 1.37E-06 | Macrophage: Gnb2      |
| 1.04E-10 | 0.40673738 | 0.293 | 0.096 | 1.48E-06 | Macrophage: Cd180     |
| 1.08E-10 | 0.34919695 | 0.202 | 0.053 | 1.53E-06 | Macrophage: Rp2       |
| 1.21E-10 | 0.32943534 | 0.192 | 0.048 | 1.72E-06 | Macrophage: Icosl     |
| 1.22E-10 | 0.57258817 | 0.455 | 0.201 | 1.72E-06 | Macrophage: Ilk       |
| 1.32E-10 | 0.43611887 | 0.364 | 0.137 | 1.87E-06 | Macrophage: Cnpy3     |
| 1.33E-10 | 0.33181001 | 0.323 | 0.112 | 1.88E-06 | Macrophage: Sgpl1     |
| 1.33E-10 | 0.40753673 | 0.333 | 0.117 | 1.88E-06 | Macrophage: Bach1     |
| 1.33E-10 | 0.31459764 | 0.384 | 0.144 | 1.89E-06 | Macrophage: Pxn       |
| 1.39E-10 | 0.43222129 | 0.384 | 0.15  | 1.96E-06 | Macrophage: Myd88     |
| 1.45E-10 | 0.53018819 | 0.394 | 0.154 | 2.05E-06 | Macrophage: Serpinb6a |
| 1.47E-10 | 0.27738153 | 0.192 | 0.049 | 2.08E-06 | Macrophage: Tbc1d5    |
| 1.51E-10 | 0.5530975  | 0.566 | 0.275 | 2.14E-06 | Macrophage: Csrnp1    |
| 1.59E-10 | 0.48373115 | 0.414 | 0.167 | 2.24E-06 | Macrophage: Tmed7     |
| 1.64E-10 | 0.42376853 | 0.444 | 0.184 | 2.32E-06 | Macrophage: Ptpre     |
| 1.72E-10 | 0.53522351 | 0.313 | 0.108 | 2.44E-06 | Macrophage: Ifi204    |
| 1.83E-10 | 0.34250283 | 0.323 | 0.112 | 2.59E-06 | Macrophage: Dram2     |
| 2.05E-10 | 0.26598953 | 0.202 | 0.054 | 2.91E-06 | Macrophage: Mpv17     |
| 2.12E-10 | 0.45092855 | 0.818 | 0.443 | 3.00E-06 | Macrophage: Pdia3     |
| 2.14E-10 | 0.32777512 | 0.263 | 0.082 | 3.03E-06 | Macrophage: Edem2     |
| 2.21E-10 | -1.5087283 | 0.253 | 0.5   | 3.13E-06 | Macrophage: Gstp1     |
| 2.31E-10 | 0.51532279 | 0.828 | 0.459 | 3.28E-06 | Macrophage: Atp6v0b   |
| 2.32E-10 | 0.2768863  | 0.152 | 0.034 | 3.28E-06 | Macrophage: Cpq       |
| 2.32E-10 | 0.35792098 | 0.364 | 0.127 | 3.29E-06 | Macrophage: Blnk      |
| 2.32E-10 | 0.2970842  | 0.192 | 0.05  | 3.29E-06 | Macrophage: Slc25a45  |
| 2.37E-10 | -2.6451475 | 0.051 | 0.349 | 3.35E-06 | Macrophage: Cd8b1     |
| 2.43E-10 | -1.6967748 | 0.364 | 0.617 | 3.44E-06 | Macrophage: S100a6    |
| 2.44E-10 | -0.7649888 | 0.879 | 0.862 | 3.45E-06 | Macrophage: Coro1a    |
| 2.75E-10 | 0.49553655 | 0.707 | 0.379 | 3.89E-06 | Macrophage: Laptm4a   |
| 2.81E-10 | 0.51550402 | 0.394 | 0.161 | 3.97E-06 | Macrophage: Slc6a6    |
| 2.89E-10 | -2.0787008 | 0.01  | 0.31  | 4.09E-06 | Macrophage: Klrd1     |
| 3.15E-10 | -0.6593028 | 1     | 0.905 | 4.46E-06 | Macrophage: Rps5      |
| 3.39E-10 | 1.13756702 | 0.778 | 0.501 | 4.81E-06 | Macrophage: H2-Eb1    |

|          |            |       |       |          |                      |
|----------|------------|-------|-------|----------|----------------------|
| 3.41E-10 | 0.36750852 | 0.444 | 0.184 | 4.82E-06 | Macrophage: Vav1     |
| 3.45E-10 | 0.27978533 | 0.242 | 0.073 | 4.89E-06 | Macrophage: Polr3gl  |
| 3.61E-10 | 0.55391487 | 0.758 | 0.397 | 5.11E-06 | Macrophage: Akr1a1   |
| 3.85E-10 | -1.6403541 | 0.384 | 0.571 | 5.44E-06 | Macrophage: H2-Q7    |
| 3.85E-10 | -0.6248826 | 0.99  | 0.877 | 5.45E-06 | Macrophage: Rplp2    |
| 3.89E-10 | -1.9694748 | 0.03  | 0.325 | 5.50E-06 | Macrophage: Ctsw     |
| 4.11E-10 | -1.8043867 | 0.071 | 0.363 | 5.81E-06 | Macrophage: Lat      |
| 4.14E-10 | 0.40762782 | 0.333 | 0.125 | 5.87E-06 | Macrophage: Ggh      |
| 4.17E-10 | 0.30805754 | 0.283 | 0.094 | 5.91E-06 | Macrophage: Rab9     |
| 4.58E-10 | 0.49941706 | 0.293 | 0.102 | 6.48E-06 | Macrophage: Scimp    |
| 4.66E-10 | 0.44730905 | 0.535 | 0.242 | 6.60E-06 | Macrophage: Epn1     |
| 4.97E-10 | 0.49061207 | 0.394 | 0.162 | 7.04E-06 | Macrophage: Naa50    |
| 4.99E-10 | 0.43173085 | 0.253 | 0.081 | 7.06E-06 | Macrophage: Nagk     |
| 5.05E-10 | -2.2161676 | 0.02  | 0.315 | 7.15E-06 | Macrophage: Cd8a     |
| 5.34E-10 | -0.6637343 | 0.98  | 0.891 | 7.56E-06 | Macrophage: Rpl32    |
| 5.48E-10 | -1.4732529 | 0.04  | 0.338 | 7.76E-06 | Macrophage: Ikzf3    |
| 5.79E-10 | 0.42425253 | 0.303 | 0.106 | 8.20E-06 | Macrophage: Ppp1r12c |
| 5.82E-10 | 0.29738761 | 0.263 | 0.083 | 8.23E-06 | Macrophage: Mapk6    |
| 5.82E-10 | 0.41413228 | 0.212 | 0.062 | 8.23E-06 | Macrophage: Dusp22   |
| 6.47E-10 | 0.26424299 | 0.343 | 0.128 | 9.16E-06 | Macrophage: Leprot   |
| 6.73E-10 | 0.36251934 | 0.212 | 0.061 | 9.53E-06 | Macrophage: Mcfd2    |
| 7.29E-10 | 0.37615212 | 0.293 | 0.101 | 1.03E-05 | Macrophage: Dnase2a  |
| 7.57E-10 | 0.38121381 | 0.152 | 0.035 | 1.07E-05 | Macrophage: Tmem9    |
| 8.28E-10 | 0.54144421 | 0.192 | 0.053 | 1.17E-05 | Macrophage: Mid1ip1  |
| 8.35E-10 | 0.3802332  | 0.141 | 0.031 | 1.18E-05 | Macrophage: Tcta     |
| 8.68E-10 | -1.3139562 | 0.03  | 0.316 | 1.23E-05 | Macrophage: Gimap1   |
| 9.74E-10 | 0.36167968 | 0.222 | 0.067 | 1.38E-05 | Macrophage: Aldh3b1  |
| 9.88E-10 | 0.47715575 | 0.374 | 0.152 | 1.40E-05 | Macrophage: Cflar    |
| 1.02E-09 | 0.39405179 | 0.273 | 0.094 | 1.44E-05 | Macrophage: Pcd2l    |
| 1.02E-09 | 0.39680688 | 0.394 | 0.158 | 1.45E-05 | Macrophage: Nisch    |
| 1.03E-09 | -0.7287396 | 0.98  | 0.951 | 1.46E-05 | Macrophage: Pfn1     |
| 1.03E-09 | -0.8233699 | 0.919 | 0.829 | 1.46E-05 | Macrophage: Rps18    |
| 1.07E-09 | 0.39299698 | 0.364 | 0.142 | 1.51E-05 | Macrophage: Scarb2   |
| 1.16E-09 | 0.39266921 | 0.212 | 0.063 | 1.64E-05 | Macrophage: Smim10l1 |
| 1.17E-09 | 0.33423327 | 0.121 | 0.025 | 1.66E-05 | Macrophage: Snx24    |
| 1.19E-09 | 0.65159089 | 0.687 | 0.356 | 1.68E-05 | Macrophage: Cstb     |
| 1.24E-09 | 0.30993636 | 0.263 | 0.087 | 1.76E-05 | Macrophage: Stard3   |
| 1.26E-09 | 0.31459051 | 0.121 | 0.025 | 1.78E-05 | Macrophage: Cadm1    |
| 1.44E-09 | -0.873614  | 0.707 | 0.764 | 2.04E-05 | Macrophage: Eif3f    |
| 1.66E-09 | 0.66479579 | 0.707 | 0.445 | 2.34E-05 | Macrophage: Srsf2    |
| 1.66E-09 | -0.6583252 | 0.919 | 0.863 | 2.35E-05 | Macrophage: Rpl29    |
| 1.72E-09 | 0.3214085  | 0.242 | 0.078 | 2.44E-05 | Macrophage: Hk2      |
| 1.86E-09 | 0.31564667 | 0.121 | 0.025 | 2.63E-05 | Macrophage: Rab40c   |
| 1.88E-09 | 0.40074048 | 0.374 | 0.148 | 2.67E-05 | Macrophage: Oat      |
| 1.90E-09 | -0.6068481 | 0.97  | 0.871 | 2.69E-05 | Macrophage: Rpl24    |
| 1.90E-09 | 0.37660279 | 0.576 | 0.274 | 2.70E-05 | Macrophage: Pitpna   |
| 2.05E-09 | 0.2879373  | 0.172 | 0.045 | 2.91E-05 | Macrophage: Rnf141   |
| 2.10E-09 | 0.28714543 | 0.162 | 0.041 | 2.97E-05 | Macrophage: Prkra    |

|          |            |       |       |            |                         |
|----------|------------|-------|-------|------------|-------------------------|
| 2.15E-09 | 0.30065418 | 0.354 | 0.135 | 3.05E-05   | Macrophage: Commd8      |
| 2.41E-09 | 0.29026513 | 0.162 | 0.041 | 3.41E-05   | Macrophage: Ctbs        |
| 2.60E-09 | 0.37557064 | 0.192 | 0.054 | 3.68E-05   | Macrophage: Tmem86a     |
| 2.86E-09 | 0.4641655  | 0.556 | 0.272 | 4.05E-05   | Macrophage: Ifnar2      |
| 2.95E-09 | 0.40833016 | 0.172 | 0.045 | 4.18E-05   | Macrophage: Slc5a3      |
| 3.05E-09 | 0.51621936 | 0.384 | 0.162 | 4.32E-05   | Macrophage: Aplp2       |
| 3.06E-09 | 0.78654423 | 0.414 | 0.183 | 4.33E-05   | Macrophage: Dnajb9      |
| 3.09E-09 | 0.27219704 | 0.475 | 0.2   | 4.37E-05   | Macrophage: Ptp4a1      |
| 3.17E-09 | 0.52025529 | 0.576 | 0.299 | 4.49E-05   | Macrophage: Coro1b      |
| 3.42E-09 | 0.33885581 | 0.131 | 0.029 | 4.84E-05   | Macrophage: Ssh3        |
| 3.50E-09 | -0.5871225 | 0.98  | 0.91  | 4.95E-05   | Macrophage: Rps4x       |
| 3.52E-09 | 0.2751875  | 0.374 | 0.149 | 4.98E-05   | Macrophage: Pik3ap1     |
| 3.68E-09 | 0.38890791 | 0.545 | 0.26  | 5.21E-05   | Macrophage: Hprt        |
| 3.80E-09 | -0.5847277 | 0.99  | 0.893 | 5.38E-05   | Macrophage: Rpl27a      |
| 4.02E-09 | 0.38494066 | 0.242 | 0.078 | 5.69E-05   | Macrophage: Slc15a4     |
| 4.13E-09 | -1.7737911 | 0.01  | 0.278 | 5.85E-05   | Macrophage: Tigit       |
| 4.66E-09 | -0.6766801 | 0.939 | 0.877 | 6.59E-05   | Macrophage: Oaz1        |
| 4.66E-09 | 0.26836569 | 0.172 | 0.046 | 6.60E-05   | Macrophage: Gm20707     |
| 4.71E-09 | -1.9618417 | 0.01  | 0.277 | 6.67E-05   | Macrophage: Pdcd1       |
| 5.01E-09 | 0.37423052 | 0.283 | 0.101 | 7.09E-05   | Macrophage: Naa20       |
| 5.08E-09 | 0.30712628 | 0.192 | 0.055 | 7.19E-05   | Macrophage: Tnip2       |
| 5.09E-09 | 0.36503794 | 0.232 | 0.075 | 7.21E-05   | Macrophage: Gabarapl1   |
| 5.12E-09 | 0.34922359 | 0.313 | 0.117 | 7.24E-05   | Macrophage: Rassf2      |
| 5.24E-09 | 0.3892505  | 0.152 | 0.038 | 7.42E-05   | Macrophage: Gcc1        |
| 5.33E-09 | 0.38662183 | 0.273 | 0.097 | 7.55E-05   | Macrophage: Ripk1       |
| 5.38E-09 | 0.6337018  | 0.677 | 0.366 | 7.62E-05   | Macrophage: H2-DMA      |
| 5.49E-09 | 0.30657595 | 0.303 | 0.112 | 7.77E-05   | Macrophage: 2610507B11f |
| 5.49E-09 | -1.5282784 | 0.061 | 0.326 | 7.77E-05   | Macrophage: Lck         |
| 5.68E-09 | 0.30323553 | 0.687 | 0.336 | 8.05E-05   | Macrophage: Lyn         |
| 5.87E-09 | 0.33735698 | 0.242 | 0.079 | 8.31E-05   | Macrophage: Ptger4      |
| 6.01E-09 | 0.51368331 | 0.747 | 0.434 | 8.51E-05   | Macrophage: Tuba1b      |
| 6.08E-09 | -1.6306771 | 0.02  | 0.284 | 8.60E-05   | Macrophage: Cst7        |
| 6.13E-09 | -0.6386185 | 0.96  | 0.869 | 8.68E-05   | Macrophage: Rpl36       |
| 6.14E-09 | 0.29977008 | 0.434 | 0.18  | 8.69E-05   | Macrophage: Taf6l       |
| 6.14E-09 | 0.3497174  | 0.182 | 0.051 | 8.70E-05   | Macrophage: 1700025G04f |
| 6.17E-09 | 0.31463018 | 0.253 | 0.085 | 8.73E-05   | Macrophage: Man2b2      |
| 6.19E-09 | 0.26166069 | 0.111 | 0.022 | 8.77E-05   | Macrophage: Xylt2       |
| 6.22E-09 | 0.29367239 | 0.263 | 0.089 | 8.81E-05   | Macrophage: Fnip1       |
| 6.54E-09 | 0.37888069 | 0.303 | 0.112 | 9.26E-05   | Macrophage: Pdlim1      |
| 7.19E-09 | -1.3894409 | 0     | 0.259 | 0.00010173 | Macrophage: Tnfrsf18    |
| 7.32E-09 | 0.3191936  | 0.121 | 0.026 | 0.00010367 | Macrophage: Mib2        |
| 7.46E-09 | 0.37688435 | 0.404 | 0.175 | 0.00010563 | Macrophage: Dctn2       |
| 7.54E-09 | 0.40833554 | 0.434 | 0.193 | 0.00010668 | Macrophage: Bin1        |
| 7.72E-09 | 0.35542057 | 0.394 | 0.17  | 0.00010922 | Macrophage: Sirt2       |
| 8.02E-09 | -1.6153946 | 0.061 | 0.327 | 0.00011358 | Macrophage: Thy1        |
| 8.68E-09 | -0.806507  | 0.879 | 0.797 | 0.00012285 | Macrophage: Naca        |
| 8.87E-09 | 0.56002413 | 0.96  | 0.778 | 0.0001255  | Macrophage: Jund        |
| 9.02E-09 | 0.26244002 | 0.515 | 0.23  | 0.00012765 | Macrophage: Mef2c       |

|          |            |       |       |            |                      |
|----------|------------|-------|-------|------------|----------------------|
| 9.11E-09 | 0.43411547 | 0.354 | 0.145 | 0.00012901 | Macrophage: Mapk14   |
| 9.21E-09 | 0.26765987 | 0.323 | 0.123 | 0.00013038 | Macrophage: Nfam1    |
| 9.38E-09 | 0.33846952 | 0.394 | 0.165 | 0.00013272 | Macrophage: Pon2     |
| 9.46E-09 | -1.3795672 | 0.374 | 0.572 | 0.00013391 | Macrophage: Cytip    |
| 9.51E-09 | 0.28375827 | 0.273 | 0.094 | 0.00013465 | Macrophage: Btk      |
| 9.90E-09 | -0.5103792 | 1     | 0.928 | 0.00014015 | Macrophage: Rpl37    |
| 1.02E-08 | 0.42876973 | 0.657 | 0.348 | 0.00014486 | Macrophage: Mrfap1   |
| 1.12E-08 | -0.5251119 | 0.99  | 0.935 | 0.000159   | Macrophage: Rps9     |
| 1.14E-08 | 0.3437982  | 0.303 | 0.114 | 0.00016128 | Macrophage: Synj1    |
| 1.18E-08 | 0.34428773 | 0.475 | 0.215 | 0.00016672 | Macrophage: Birc3    |
| 1.21E-08 | 0.3690405  | 0.202 | 0.061 | 0.00017157 | Macrophage: Bbc3     |
| 1.22E-08 | 0.42426484 | 0.556 | 0.278 | 0.0001721  | Macrophage: Sod2     |
| 1.23E-08 | 0.48250462 | 0.273 | 0.101 | 0.00017452 | Macrophage: Ap1b1    |
| 1.24E-08 | 0.30788313 | 0.495 | 0.233 | 0.00017544 | Macrophage: Etf1     |
| 1.26E-08 | -1.6777128 | 0.545 | 0.651 | 0.00017875 | Macrophage: S100a11  |
| 1.32E-08 | -0.5772849 | 0.96  | 0.876 | 0.00018635 | Macrophage: Rps14    |
| 1.45E-08 | 0.6428235  | 0.687 | 0.414 | 0.00020563 | Macrophage: Tuba1c   |
| 1.70E-08 | 0.38581283 | 0.556 | 0.279 | 0.00024032 | Macrophage: Ddost    |
| 1.74E-08 | 0.32667681 | 0.343 | 0.135 | 0.00024566 | Macrophage: Siah2    |
| 1.82E-08 | 0.324255   | 0.152 | 0.039 | 0.00025745 | Macrophage: Naip5    |
| 1.86E-08 | 0.46942569 | 0.636 | 0.349 | 0.00026304 | Macrophage: Ywhae    |
| 1.87E-08 | -1.4180387 | 0.283 | 0.509 | 0.00026402 | Macrophage: Fam107b  |
| 1.88E-08 | 0.35135427 | 0.768 | 0.427 | 0.00026573 | Macrophage: Tgfb1    |
| 1.90E-08 | -2.0948002 | 0.091 | 0.35  | 0.00026866 | Macrophage: Plac8    |
| 1.90E-08 | 0.34373953 | 0.283 | 0.106 | 0.00026956 | Macrophage: Slc35b2  |
| 2.06E-08 | 0.35088071 | 0.354 | 0.147 | 0.00029118 | Macrophage: Mapkapk2 |
| 2.19E-08 | 0.25167797 | 0.212 | 0.067 | 0.00031022 | Macrophage: Lonp1    |
| 2.22E-08 | 0.2569791  | 0.212 | 0.069 | 0.00031475 | Macrophage: Dcxr     |
| 2.38E-08 | 0.3070154  | 0.202 | 0.063 | 0.00033634 | Macrophage: Sh3bp2   |
| 2.40E-08 | 0.49048262 | 0.848 | 0.54  | 0.00034006 | Macrophage: Eif4a1   |
| 2.67E-08 | 0.32598736 | 0.424 | 0.19  | 0.00037777 | Macrophage: Pip4k2a  |
| 2.82E-08 | 0.31613463 | 0.323 | 0.129 | 0.00039919 | Macrophage: Reep3    |
| 2.99E-08 | -1.5190345 | 0.242 | 0.461 | 0.00042256 | Macrophage: Hcst     |
| 2.99E-08 | 0.59531476 | 0.414 | 0.186 | 0.00042366 | Macrophage: Cd9      |
| 3.05E-08 | 0.31716923 | 0.242 | 0.083 | 0.00043246 | Macrophage: Bmp2k    |
| 3.06E-08 | 0.28295126 | 0.253 | 0.086 | 0.00043254 | Macrophage: Myc      |
| 3.06E-08 | -0.876329  | 0.768 | 0.766 | 0.00043327 | Macrophage: Myl12b   |
| 3.16E-08 | -1.2540271 | 0.051 | 0.304 | 0.00044705 | Macrophage: Gm8369   |
| 3.36E-08 | 0.25177802 | 0.172 | 0.049 | 0.00047596 | Macrophage: Man2c1   |
| 3.39E-08 | -0.4839555 | 0.99  | 0.951 | 0.00047923 | Macrophage: Tpt1     |
| 3.70E-08 | 0.4715529  | 0.475 | 0.232 | 0.00052413 | Macrophage: Oser1    |
| 3.82E-08 | 0.28788668 | 0.202 | 0.063 | 0.00054071 | Macrophage: Myo18a   |
| 3.90E-08 | -0.7710513 | 0.838 | 0.768 | 0.00055173 | Macrophage: Btf3     |
| 4.17E-08 | 0.51945959 | 0.677 | 0.406 | 0.0005901  | Macrophage: Ahnak    |
| 4.30E-08 | -0.6481191 | 0.929 | 0.825 | 0.00060843 | Macrophage: Rpl14    |
| 4.39E-08 | 0.66529994 | 0.697 | 0.432 | 0.00062164 | Macrophage: Rsrp1    |
| 4.41E-08 | -1.5164411 | 0.02  | 0.264 | 0.00062412 | Macrophage: Il2rb    |
| 4.58E-08 | 0.35868543 | 0.343 | 0.141 | 0.00064892 | Macrophage: Ivns1abp |



|          |            |       |       |            |                      |
|----------|------------|-------|-------|------------|----------------------|
| 4.97E-08 | 0.34368714 | 0.222 | 0.075 | 0.00070387 | Macrophage: Mrpl3    |
| 5.04E-08 | 0.27990613 | 0.182 | 0.054 | 0.00071351 | Macrophage: Kat5     |
| 5.33E-08 | -1.1805315 | 0.212 | 0.455 | 0.00075478 | Macrophage: Prdx6    |
| 5.74E-08 | 0.34057979 | 0.192 | 0.06  | 0.00081209 | Macrophage: Scarb1   |
| 6.28E-08 | 0.4192284  | 0.394 | 0.174 | 0.00088951 | Macrophage: Zc3h12a  |
| 6.49E-08 | 0.32977492 | 0.202 | 0.065 | 0.00091853 | Macrophage: Adam9    |
| 6.58E-08 | 0.32883447 | 0.172 | 0.051 | 0.00093095 | Macrophage: Dync1li2 |
| 6.63E-08 | 0.26588219 | 0.273 | 0.103 | 0.00093895 | Macrophage: Ppp1r9b  |
| 6.95E-08 | 0.35724885 | 0.859 | 0.565 | 0.00098419 | Macrophage: Zfp36l2  |
| 7.22E-08 | 0.28419885 | 0.152 | 0.042 | 0.00102244 | Macrophage: Frmd4a   |
| 7.45E-08 | 0.49093933 | 0.465 | 0.238 | 0.00105465 | Macrophage: Scamp2   |
| 7.53E-08 | 0.51869788 | 0.909 | 0.723 | 0.0010659  | Macrophage: mt-Nd4   |
| 7.74E-08 | -1.2533009 | 0.081 | 0.329 | 0.00109592 | Macrophage: Gimap3   |
| 7.95E-08 | -1.4041785 | 0.172 | 0.414 | 0.00112494 | Macrophage: Gimap6   |
| 7.99E-08 | -1.272397  | 0.091 | 0.34  | 0.00113098 | Macrophage: Gimap4   |
| 8.59E-08 | 0.29468346 | 0.384 | 0.171 | 0.0012163  | Macrophage: Rela     |
| 8.69E-08 | 0.29221092 | 0.192 | 0.061 | 0.00122949 | Macrophage: Mcoln1   |
| 8.92E-08 | 0.26315746 | 0.121 | 0.029 | 0.00126214 | Macrophage: Maml2    |
| 9.37E-08 | -0.7679633 | 0.869 | 0.782 | 0.00132648 | Macrophage: Cox8a    |
| 9.48E-08 | 0.32452863 | 0.242 | 0.087 | 0.00134144 | Macrophage: Furin    |
| 9.51E-08 | 0.2905863  | 0.131 | 0.034 | 0.00134684 | Macrophage: Tmem159  |
| 9.95E-08 | -2.2594191 | 0.01  | 0.241 | 0.00140906 | Macrophage: Gzmb     |
| 1.04E-07 | 0.61843959 | 0.838 | 0.496 | 0.00146804 | Macrophage: Pcbp1    |
| 1.11E-07 | -1.7610689 | 0.01  | 0.239 | 0.0015741  | Macrophage: Ctla4    |
| 1.13E-07 | 0.47174863 | 0.444 | 0.216 | 0.0015966  | Macrophage: Rpn2     |
| 1.13E-07 | 0.25259137 | 0.212 | 0.072 | 0.00159876 | Macrophage: Ltbr     |
| 1.15E-07 | 0.2634051  | 0.253 | 0.091 | 0.00162135 | Macrophage: Tfeb     |
| 1.24E-07 | -1.132927  | 0.03  | 0.262 | 0.00175666 | Macrophage: Skap1    |
| 1.26E-07 | 0.2720427  | 0.364 | 0.156 | 0.00178005 | Macrophage: Hexim1   |
| 1.28E-07 | -0.7642878 | 0.848 | 0.753 | 0.00180653 | Macrophage: Rpl36al  |
| 1.32E-07 | 0.27842294 | 0.111 | 0.026 | 0.00187026 | Macrophage: Akr1e1   |
| 1.36E-07 | 0.26320347 | 0.384 | 0.169 | 0.00192932 | Macrophage: Tm9sf2   |
| 1.37E-07 | 0.29596169 | 0.172 | 0.053 | 0.00194287 | Macrophage: Prkar2a  |
| 1.43E-07 | 0.40861695 | 0.182 | 0.056 | 0.00202748 | Macrophage: Hes1     |
| 1.47E-07 | 0.27829081 | 0.242 | 0.088 | 0.00207785 | Macrophage: Epb41l2  |
| 1.55E-07 | 0.31905978 | 0.677 | 0.364 | 0.00218792 | Macrophage: Ptms     |
| 1.55E-07 | 0.33208614 | 0.232 | 0.083 | 0.00220056 | Macrophage: Rock2    |
| 1.56E-07 | 0.33241194 | 0.121 | 0.029 | 0.00220144 | Macrophage: Thbd     |
| 1.58E-07 | 0.4995545  | 0.657 | 0.384 | 0.0022376  | Macrophage: Calr     |
| 1.64E-07 | -1.168063  | 0.081 | 0.326 | 0.00232544 | Macrophage: Ablim1   |
| 1.66E-07 | 0.32720684 | 0.172 | 0.053 | 0.00234443 | Macrophage: Acp2     |
| 1.71E-07 | 0.29734813 | 0.212 | 0.072 | 0.0024251  | Macrophage: Pik3c2a  |
| 1.71E-07 | 0.32203624 | 0.212 | 0.074 | 0.00242591 | Macrophage: Plbd2    |
| 1.82E-07 | -1.5738607 | 0.04  | 0.271 | 0.00257162 | Macrophage: Icos     |
| 1.82E-07 | 0.41300023 | 0.303 | 0.128 | 0.00257287 | Macrophage: Sema4a   |
| 1.86E-07 | 0.40672178 | 0.253 | 0.098 | 0.00263244 | Macrophage: Rap2b    |
| 1.89E-07 | 0.30149351 | 0.182 | 0.058 | 0.00268254 | Macrophage: Nagpa    |
| 1.94E-07 | -0.5693975 | 0.949 | 0.851 | 0.00273948 | Macrophage: Rps23    |

|          |            |       |       |            |                      |
|----------|------------|-------|-------|------------|----------------------|
| 1.94E-07 | 0.29885227 | 0.162 | 0.049 | 0.00274334 | Macrophage: Tns3     |
| 2.05E-07 | -1.4479848 | 0.192 | 0.428 | 0.00290257 | Macrophage: Nr4a2    |
| 2.06E-07 | 0.30836972 | 0.232 | 0.085 | 0.00291476 | Macrophage: Abcd1    |
| 2.08E-07 | 0.68642895 | 0.636 | 0.4   | 0.0029476  | Macrophage: Ifrd1    |
| 2.09E-07 | -1.4616956 | 0.101 | 0.33  | 0.00295241 | Macrophage: Napsa    |
| 2.12E-07 | 0.82823513 | 0.354 | 0.162 | 0.00299998 | Macrophage: Anxa1    |
| 2.16E-07 | 0.29547368 | 0.242 | 0.091 | 0.00305379 | Macrophage: Dpysl2   |
| 2.18E-07 | -0.678259  | 0.859 | 0.815 | 0.00308237 | Macrophage: Rpl41    |
| 2.27E-07 | -1.1032934 | 0.03  | 0.256 | 0.00321511 | Macrophage: Gimap5   |
| 2.28E-07 | 0.39313773 | 0.545 | 0.301 | 0.00323019 | Macrophage: Rab7     |
| 2.32E-07 | 0.31162224 | 0.343 | 0.151 | 0.00328556 | Macrophage: Tmem173  |
| 2.41E-07 | 0.41798271 | 0.283 | 0.115 | 0.00340706 | Macrophage: Srsf9    |
| 2.42E-07 | 0.37900879 | 0.202 | 0.07  | 0.00342678 | Macrophage: Dennd1a  |
| 2.48E-07 | 0.49239465 | 0.99  | 0.863 | 0.00351108 | Macrophage: mt-Nd1   |
| 2.55E-07 | -0.9941902 | 0.657 | 0.671 | 0.00361492 | Macrophage: Rpl22l1  |
| 2.64E-07 | 0.32620665 | 0.222 | 0.08  | 0.0037329  | Macrophage: Ctnna1   |
| 2.64E-07 | -1.111261  | 0.04  | 0.273 | 0.00373543 | Macrophage: Itgal    |
| 2.67E-07 | 0.31273081 | 0.596 | 0.315 | 0.00378043 | Macrophage: Tkt      |
| 2.72E-07 | 0.44655052 | 0.374 | 0.169 | 0.00385456 | Macrophage: Gpr183   |
| 2.73E-07 | 0.38295416 | 0.182 | 0.058 | 0.00386076 | Macrophage: Ralgds   |
| 2.83E-07 | -1.0377961 | 0.404 | 0.548 | 0.00400166 | Macrophage: Fis1     |
| 2.83E-07 | 0.70021301 | 0.859 | 0.691 | 0.00400674 | Macrophage: Dnaja1   |
| 3.00E-07 | 0.34220825 | 0.566 | 0.301 | 0.00424465 | Macrophage: Il10ra   |
| 3.03E-07 | 0.33233825 | 0.394 | 0.178 | 0.00428434 | Macrophage: Plbd1    |
| 3.04E-07 | -0.9628481 | 0.626 | 0.658 | 0.00430696 | Macrophage: Atp5g3   |
| 3.08E-07 | 0.59217528 | 0.96  | 0.822 | 0.0043568  | Macrophage: mt-Nd2   |
| 3.25E-07 | 0.32328162 | 0.232 | 0.085 | 0.00459628 | Macrophage: Nbr1     |
| 3.37E-07 | -1.147439  | 0.02  | 0.238 | 0.00477112 | Macrophage: Gimap7   |
| 3.53E-07 | -1.5380073 | 0.01  | 0.224 | 0.00499662 | Macrophage: Lag3     |
| 3.56E-07 | 0.31822141 | 0.162 | 0.049 | 0.00503724 | Macrophage: Slc16a10 |
| 3.66E-07 | 0.3480329  | 0.919 | 0.669 | 0.00517762 | Macrophage: Gabarap  |
| 3.84E-07 | 0.39774539 | 0.343 | 0.156 | 0.00543605 | Macrophage: Ccrl2    |
| 4.40E-07 | -0.9786434 | 0.04  | 0.26  | 0.00622558 | Macrophage: Itgb7    |
| 4.41E-07 | 0.41065973 | 0.465 | 0.241 | 0.006239   | Macrophage: Tiparp   |
| 4.46E-07 | 0.29528025 | 0.263 | 0.103 | 0.0063131  | Macrophage: Ddi2     |
| 4.50E-07 | 0.31577422 | 0.222 | 0.082 | 0.00636648 | Macrophage: Rabl6    |
| 4.59E-07 | 0.63841213 | 0.242 | 0.094 | 0.00649119 | Macrophage: Il1rn    |
| 4.70E-07 | 0.26449763 | 0.283 | 0.114 | 0.00664902 | Macrophage: Pdlim5   |
| 4.73E-07 | 0.37923413 | 0.303 | 0.13  | 0.00669166 | Macrophage: Clptm1   |
| 4.74E-07 | 0.33508306 | 0.263 | 0.106 | 0.00670982 | Macrophage: Usf1     |
| 4.80E-07 | 0.33146834 | 0.283 | 0.117 | 0.00680026 | Macrophage: Rnf5     |
| 4.82E-07 | 0.285676   | 0.242 | 0.092 | 0.00682357 | Macrophage: Dusp3    |
| 4.96E-07 | -0.7903905 | 0.798 | 0.761 | 0.00702611 | Macrophage: Eef1b2   |
| 5.20E-07 | 0.40426904 | 0.838 | 0.56  | 0.00736426 | Macrophage: Tpm3     |
| 5.62E-07 | 0.2649417  | 0.172 | 0.055 | 0.00796118 | Macrophage: Mpp6     |
| 6.02E-07 | 0.2595896  | 0.222 | 0.081 | 0.00851981 | Macrophage: Strn4    |
| 6.17E-07 | 0.2738569  | 0.131 | 0.036 | 0.00874079 | Macrophage: Dag1     |
| 6.44E-07 | 0.25372612 | 0.212 | 0.076 | 0.00911657 | Macrophage: Pcyt1a   |

|          |            |       |       |            |                         |
|----------|------------|-------|-------|------------|-------------------------|
| 6.45E-07 | 0.41838118 | 1     | 0.92  | 0.00912963 | Macrophage: mt-Cytb     |
| 6.66E-07 | 0.32000131 | 0.485 | 0.25  | 0.00943352 | Macrophage: Rab5c       |
| 6.92E-07 | -1.2954162 | 0.475 | 0.588 | 0.00980297 | Macrophage: Cd37        |
| 7.04E-07 | 0.26020699 | 0.232 | 0.088 | 0.00996596 | Macrophage: Fbxw11      |
| 7.35E-07 | -0.6002538 | 0.96  | 0.847 | 0.01040636 | Macrophage: Rpl10a      |
| 7.76E-07 | 0.43916045 | 0.697 | 0.407 | 0.01098793 | Macrophage: Brd2        |
| 7.95E-07 | 0.34056552 | 0.758 | 0.465 | 0.01125303 | Macrophage: Snx3        |
| 8.03E-07 | 0.32341935 | 0.202 | 0.072 | 0.01136615 | Macrophage: Smpdl3b     |
| 8.07E-07 | 0.30238334 | 0.808 | 0.525 | 0.01142263 | Macrophage: Sat1        |
| 8.13E-07 | -0.7654277 | 0.828 | 0.764 | 0.01151048 | Macrophage: Arpc3       |
| 8.50E-07 | 0.29974268 | 0.657 | 0.356 | 0.012032   | Macrophage: Dbi         |
| 8.56E-07 | 0.28826259 | 0.152 | 0.047 | 0.01211158 | Macrophage: Tmem106c    |
| 8.88E-07 | -1.0676691 | 0.081 | 0.303 | 0.01257277 | Macrophage: 4930523C07F |
| 8.89E-07 | 0.46910906 | 0.172 | 0.057 | 0.01259016 | Macrophage: Tifab       |
| 9.31E-07 | -1.3990922 | 0.01  | 0.215 | 0.01318335 | Macrophage: Cxcr6       |
| 9.47E-07 | 0.25810112 | 0.121 | 0.032 | 0.01340597 | Macrophage: Wdfy2       |
| 9.94E-07 | 0.28202685 | 0.202 | 0.072 | 0.01406842 | Macrophage: Orai3       |
| 1.01E-06 | 0.32148223 | 0.323 | 0.146 | 0.0143263  | Macrophage: Ube2r2      |
| 1.01E-06 | -1.2208287 | 0.182 | 0.417 | 0.01435288 | Macrophage: Cd69        |
| 1.15E-06 | 0.25926834 | 0.172 | 0.056 | 0.01625935 | Macrophage: Abl2        |
| 1.21E-06 | -0.9897736 | 0.04  | 0.248 | 0.0171437  | Macrophage: Cyfip2      |
| 1.28E-06 | -1.1725075 | 0.212 | 0.418 | 0.01806959 | Macrophage: Rps27rt     |
| 1.36E-06 | 0.3954223  | 0.242 | 0.098 | 0.01929216 | Macrophage: Aldh9a1     |
| 1.40E-06 | 0.30584416 | 0.172 | 0.057 | 0.01988159 | Macrophage: Lman2l      |
| 1.41E-06 | -0.5593996 | 0.97  | 0.891 | 0.01999762 | Macrophage: Rpl39       |
| 1.45E-06 | 0.37404119 | 0.424 | 0.213 | 0.02051089 | Macrophage: Xbp1        |
| 1.50E-06 | -0.5443528 | 1     | 0.923 | 0.02128921 | Macrophage: B2m         |
| 1.51E-06 | -1.0149012 | 0.02  | 0.22  | 0.02140364 | Macrophage: Rnf125      |
| 1.61E-06 | 0.47930622 | 0.869 | 0.548 | 0.02276607 | Macrophage: Tagln2      |
| 1.61E-06 | -0.9186236 | 0.96  | 0.922 | 0.02283783 | Macrophage: Gapdh       |
| 1.62E-06 | 0.25044483 | 0.172 | 0.058 | 0.02287151 | Macrophage: Apaf1       |
| 1.62E-06 | -1.6189561 | 0     | 0.191 | 0.02289463 | Macrophage: Ifng        |
| 2.00E-06 | 0.34617392 | 0.182 | 0.063 | 0.02825946 | Macrophage: Gpr137b     |
| 2.01E-06 | 0.26095781 | 0.677 | 0.405 | 0.02841007 | Macrophage: Bri3        |
| 2.01E-06 | 0.26250036 | 0.273 | 0.116 | 0.02850356 | Macrophage: Dctn5       |
| 2.12E-06 | 0.27473883 | 0.313 | 0.14  | 0.02999579 | Macrophage: Stt3a       |
| 2.12E-06 | 0.36035472 | 0.909 | 0.686 | 0.03007906 | Macrophage: Lcp1        |
| 2.16E-06 | 0.3375875  | 0.283 | 0.121 | 0.03057058 | Macrophage: Nabp1       |
| 2.26E-06 | 0.25695528 | 0.121 | 0.034 | 0.03192467 | Macrophage: Pvt1        |
| 2.30E-06 | 0.272674   | 0.232 | 0.089 | 0.03261698 | Macrophage: Dnajb4      |
| 2.39E-06 | 0.27651786 | 0.131 | 0.039 | 0.03380885 | Macrophage: Sh3pxd2b    |
| 2.43E-06 | 0.28954421 | 0.111 | 0.03  | 0.03438375 | Macrophage: Smad1       |
| 2.53E-06 | 0.35082185 | 0.253 | 0.105 | 0.03575631 | Macrophage: Trim8       |
| 2.60E-06 | 0.27627335 | 0.253 | 0.106 | 0.03686911 | Macrophage: Mdfic       |
| 2.62E-06 | 0.3069692  | 0.323 | 0.149 | 0.03712197 | Macrophage: Casp8       |
| 2.62E-06 | 0.25059171 | 0.394 | 0.198 | 0.03712328 | Macrophage: Hpcal1      |
| 2.67E-06 | 0.36447674 | 0.485 | 0.255 | 0.0377823  | Macrophage: Neur13      |
| 2.77E-06 | -0.6762063 | 0.848 | 0.779 | 0.03920999 | Macrophage: Rps6        |

|          |            |       |       |            |                         |
|----------|------------|-------|-------|------------|-------------------------|
| 2.98E-06 | -0.9353016 | 0     | 0.183 | 0.04216978 | Macrophage: Serpina3g   |
| 3.01E-06 | -1.162086  | 0.04  | 0.235 | 0.04266565 | Macrophage: Cd27        |
| 3.05E-06 | 0.25952279 | 0.273 | 0.117 | 0.04311609 | Macrophage: Slc43a2     |
| 3.09E-06 | -0.5693368 | 0.96  | 0.888 | 0.04379356 | Macrophage: Rpl21       |
| 3.26E-06 | -0.7960694 | 0.778 | 0.721 | 0.04610376 | Macrophage: Rbm3        |
| 3.26E-06 | 0.31254531 | 0.333 | 0.158 | 0.04620842 | Macrophage: Sh3bp1      |
| 3.33E-06 | 0.51671564 | 0.646 | 0.383 | 0.04713944 | Macrophage: Arf4        |
| 3.36E-06 | 0.26512868 | 0.172 | 0.059 | 0.04751003 | Macrophage: Dennd4b     |
| 3.76E-06 | -1.7339593 | 0.02  | 0.212 | 0.0532399  | Macrophage: Ly6c2       |
| 3.77E-06 | -1.1518352 | 0.061 | 0.263 | 0.05342549 | Macrophage: Itk         |
| 3.92E-06 | 1.04116531 | 0.343 | 0.174 | 0.05542959 | Macrophage: Gadd45g     |
| 4.06E-06 | -1.2495181 | 0.081 | 0.28  | 0.05750852 | Macrophage: Sell        |
| 4.12E-06 | 0.29894674 | 0.283 | 0.124 | 0.05835786 | Macrophage: Fam111a     |
| 4.12E-06 | 0.25795304 | 0.404 | 0.202 | 0.05836933 | Macrophage: Sptssa      |
| 4.26E-06 | 0.27357019 | 0.909 | 0.58  | 0.06026179 | Macrophage: Pcbp2       |
| 4.27E-06 | 0.29594966 | 0.616 | 0.355 | 0.06041427 | Macrophage: Hcls1       |
| 4.35E-06 | 0.29031677 | 0.273 | 0.119 | 0.06153894 | Macrophage: Dlgap4      |
| 4.39E-06 | 0.31796377 | 0.182 | 0.067 | 0.06214143 | Macrophage: Batf3       |
| 4.42E-06 | 0.41709342 | 0.889 | 0.617 | 0.06255133 | Macrophage: Clta        |
| 4.43E-06 | 0.35400206 | 0.182 | 0.066 | 0.06268467 | Macrophage: B4galt3     |
| 4.53E-06 | 0.35364084 | 0.273 | 0.122 | 0.06412677 | Macrophage: Fibp        |
| 4.58E-06 | 0.34536198 | 0.283 | 0.128 | 0.06488273 | Macrophage: Rnf19b      |
| 4.63E-06 | 0.25755873 | 0.111 | 0.03  | 0.06555312 | Macrophage: Ank         |
| 4.92E-06 | -1.302095  | 0     | 0.176 | 0.06969663 | Macrophage: Prf1        |
| 4.95E-06 | 0.33301806 | 0.444 | 0.234 | 0.07009522 | Macrophage: Ehd1        |
| 4.95E-06 | 0.34104327 | 0.798 | 0.527 | 0.07011677 | Macrophage: Rac1        |
| 5.00E-06 | -2.7573125 | 0.061 | 0.248 | 0.07075495 | Macrophage: Cd79a       |
| 5.10E-06 | 0.28850709 | 0.263 | 0.115 | 0.07213488 | Macrophage: Pgrmc1      |
| 5.14E-06 | 0.32407047 | 0.293 | 0.134 | 0.07281571 | Macrophage: Aars        |
| 5.42E-06 | -1.1142969 | 0.212 | 0.41  | 0.07675979 | Macrophage: H2-Q6       |
| 5.69E-06 | 0.30671749 | 0.424 | 0.217 | 0.08052872 | Macrophage: Srsf6       |
| 5.70E-06 | 0.38307442 | 0.889 | 0.656 | 0.08063502 | Macrophage: Rhoa        |
| 5.93E-06 | 0.29332946 | 0.202 | 0.078 | 0.08397602 | Macrophage: Stx6        |
| 5.98E-06 | 0.25097996 | 0.141 | 0.045 | 0.08467107 | Macrophage: Trim41      |
| 5.98E-06 | -0.9151467 | 0.04  | 0.24  | 0.08471727 | Macrophage: P2ry10      |
| 6.18E-06 | 0.31910394 | 0.303 | 0.143 | 0.08749872 | Macrophage: Blvra       |
| 6.42E-06 | -0.9793678 | 0.081 | 0.279 | 0.09086496 | Macrophage: Isy1        |
| 6.46E-06 | 0.3261342  | 0.828 | 0.559 | 0.09138838 | Macrophage: Rap1b       |
| 6.92E-06 | -1.1293955 | 0.525 | 0.575 | 0.09800397 | Macrophage: Psme2       |
| 7.40E-06 | -0.4846725 | 0.99  | 0.909 | 0.10481554 | Macrophage: Rpl37a      |
| 7.44E-06 | 0.42745871 | 0.131 | 0.042 | 0.10529813 | Macrophage: Phf11d      |
| 7.75E-06 | -1.0307629 | 0.081 | 0.272 | 0.10974753 | Macrophage: Rasgrp2     |
| 7.80E-06 | -0.485013  | 1     | 0.907 | 0.11038847 | Macrophage: Ppia        |
| 7.85E-06 | -0.8837406 | 0.071 | 0.259 | 0.1111803  | Macrophage: 1110008P14f |
| 7.87E-06 | 0.25200036 | 0.263 | 0.115 | 0.11135692 | Macrophage: Hsd17b12    |
| 8.28E-06 | -0.998854  | 0.01  | 0.184 | 0.11725243 | Macrophage: Tox         |
| 8.32E-06 | 0.29147338 | 0.364 | 0.185 | 0.11774764 | Macrophage: Necap2      |
| 8.36E-06 | 0.38617361 | 0.212 | 0.086 | 0.11832756 | Macrophage: Insig1      |

|          |            |       |       |            |                     |
|----------|------------|-------|-------|------------|---------------------|
| 8.84E-06 | -1.0939571 | 0     | 0.168 | 0.12515646 | Macrophage: Tnfrsf9 |
| 9.00E-06 | -1.0033673 | 0.071 | 0.255 | 0.12736665 | Macrophage: Zgpat   |
| 9.14E-06 | -0.7979304 | 0.01  | 0.183 | 0.12934604 | Macrophage: Acap1   |
| 9.19E-06 | 0.45571825 | 0.596 | 0.36  | 0.13007114 | Macrophage: Bcl2a1b |
| 9.44E-06 | -1.010192  | 0.545 | 0.578 | 0.13361993 | Macrophage: Cox5a   |
| 9.52E-06 | 0.32996038 | 0.162 | 0.057 | 0.13469812 | Macrophage: Nbeal1  |
| 9.56E-06 | -1.1697803 | 0.061 | 0.245 | 0.13537237 | Macrophage: Cd28    |
| 1.02E-05 | 0.35468416 | 0.172 | 0.063 | 0.14484161 | Macrophage: Plekha1 |
| 1.07E-05 | 0.43990716 | 0.646 | 0.403 | 0.15144308 | Macrophage: Txnip   |
| 1.08E-05 | -0.8149466 | 0.828 | 0.755 | 0.15303896 | Macrophage: Rpl12   |
| 1.13E-05 | 0.42240823 | 0.333 | 0.165 | 0.15954958 | Macrophage: Rraga   |
| 1.16E-05 | 0.25138464 | 0.99  | 0.907 | 0.16485659 | Macrophage: mt-Atp8 |
| 1.16E-05 | -1.4092635 | 0.01  | 0.178 | 0.1648855  | Macrophage: Cd7     |
| 1.17E-05 | 0.33463757 | 0.838 | 0.562 | 0.16558418 | Macrophage: Gnai2   |
| 1.23E-05 | -2.3673346 | 0.04  | 0.215 | 0.17392385 | Macrophage: Ly6d    |
| 1.23E-05 | -0.5138005 | 0.909 | 0.82  | 0.17397446 | Macrophage: Rpl22   |
| 1.30E-05 | -0.8841746 | 0.081 | 0.276 | 0.18467224 | Macrophage: Sik1    |
| 1.33E-05 | 0.30534791 | 0.374 | 0.198 | 0.18795097 | Macrophage: Tmco1   |
| 1.39E-05 | -0.9289009 | 0     | 0.162 | 0.19646917 | Macrophage: Klrk1   |
| 1.40E-05 | -0.8321361 | 0.04  | 0.224 | 0.19863432 | Macrophage: Cd247   |
| 1.46E-05 | 0.25254999 | 0.303 | 0.147 | 0.20609856 | Macrophage: Lamtor3 |
| 1.50E-05 | 0.27885421 | 0.202 | 0.081 | 0.21272026 | Macrophage: Bcl2a1a |
| 1.62E-05 | -0.5009678 | 0.919 | 0.844 | 0.22983382 | Macrophage: Rpl3    |
| 1.63E-05 | 0.37551068 | 0.869 | 0.637 | 0.23028776 | Macrophage: Actr3   |
| 1.69E-05 | -1.4353248 | 0     | 0.159 | 0.23867399 | Macrophage: Tnfrsf4 |
| 1.84E-05 | 0.2919217  | 0.323 | 0.162 | 0.26009129 | Macrophage: Dync1i2 |
| 1.84E-05 | 0.31600253 | 0.333 | 0.166 | 0.26083998 | Macrophage: Aph1a   |
| 1.86E-05 | 0.27612171 | 0.96  | 0.803 | 0.2637515  | Macrophage: Laptm5  |
| 2.00E-05 | -1.0256458 | 0.263 | 0.453 | 0.28284854 | Macrophage: Dusp5   |
| 2.02E-05 | -1.8312344 | 0.051 | 0.223 | 0.28649217 | Macrophage: Ebf1    |
| 2.04E-05 | 0.29540074 | 0.758 | 0.507 | 0.28885452 | Macrophage: Cotl1   |
| 2.05E-05 | -0.883191  | 0.727 | 0.659 | 0.2904245  | Macrophage: Psme1   |
| 2.13E-05 | 0.29682395 | 0.394 | 0.216 | 0.30169524 | Macrophage: Twf2    |
| 2.15E-05 | -0.7828302 | 0.01  | 0.171 | 0.30497529 | Macrophage: Zap70   |
| 2.15E-05 | 0.2669931  | 0.333 | 0.167 | 0.30498868 | Macrophage: Stx4a   |
| 2.24E-05 | 0.28690993 | 0.172 | 0.066 | 0.31750195 | Macrophage: Tmem115 |
| 2.41E-05 | -0.718488  | 0.97  | 0.86  | 0.34130532 | Macrophage: H3f3a   |
| 2.50E-05 | 0.2609906  | 0.212 | 0.089 | 0.35341637 | Macrophage: Anapc2  |
| 2.54E-05 | 0.86532527 | 0.828 | 0.636 | 0.35965134 | Macrophage: Vim     |
| 2.57E-05 | 0.38190178 | 0.96  | 0.815 | 0.36418534 | Macrophage: Ddx5    |
| 2.72E-05 | 0.27547307 | 0.152 | 0.055 | 0.38457901 | Macrophage: Vps9d1  |
| 2.73E-05 | 0.32964496 | 1     | 0.974 | 0.38628807 | Macrophage: Ubb     |
| 2.85E-05 | -0.835465  | 0.141 | 0.326 | 0.40333071 | Macrophage: Sys1    |
| 2.87E-05 | -3.4846863 | 0.03  | 0.194 | 0.40659884 | Macrophage: Gzma    |
| 2.94E-05 | 0.27803338 | 0.141 | 0.049 | 0.41618445 | Macrophage: Pde12   |
| 3.14E-05 | 0.25049258 | 0.263 | 0.123 | 0.44481753 | Macrophage: Slc39a7 |
| 3.18E-05 | -0.8293187 | 0     | 0.15  | 0.45082705 | Macrophage: Cd5     |
| 3.27E-05 | -0.8870369 | 0.03  | 0.192 | 0.46330812 | Macrophage: Stat4   |

|            |            |       |       |            |                         |
|------------|------------|-------|-------|------------|-------------------------|
| 3.30E-05   | 0.28837971 | 0.313 | 0.156 | 0.46742675 | Macrophage: Ddit3       |
| 3.30E-05   | -0.9832894 | 0.333 | 0.453 | 0.46751207 | Macrophage: Erh         |
| 3.38E-05   | -0.3808981 | 0.97  | 0.945 | 0.47872912 | Macrophage: Eif1        |
| 3.38E-05   | -1.9464103 | 0.111 | 0.283 | 0.47917315 | Macrophage: Ccr7        |
| 3.44E-05   | -0.7427765 | 0.02  | 0.181 | 0.48719382 | Macrophage: Pkp3        |
| 3.45E-05   | 0.54222738 | 0.909 | 0.718 | 0.48867565 | Macrophage: Crip1       |
| 3.78E-05   | -0.8399278 | 0.04  | 0.201 | 0.53565787 | Macrophage: Acot7       |
| 3.93E-05   | -1.0750931 | 0.061 | 0.234 | 0.55633408 | Macrophage: Gem         |
| 3.95E-05   | 0.45381702 | 0.394 | 0.223 | 0.55925242 | Macrophage: Glipr1      |
| 4.16E-05   | -0.84364   | 0.071 | 0.241 | 0.58827279 | Macrophage: Tbc1d10c    |
| 4.20E-05   | 0.25328969 | 0.172 | 0.067 | 0.59409648 | Macrophage: Gmppa       |
| 4.33E-05   | 0.34244395 | 0.253 | 0.116 | 0.61269916 | Macrophage: 4933434E20f |
| 4.60E-05   | 0.27605469 | 0.313 | 0.161 | 0.65143069 | Macrophage: Nucb1       |
| 4.67E-05   | 0.35363134 | 0.172 | 0.068 | 0.6611463  | Macrophage: Vav3        |
| 4.67E-05   | 0.31919089 | 0.162 | 0.064 | 0.66148019 | Macrophage: Gipc1       |
| 4.78E-05   | 0.25132807 | 0.758 | 0.479 | 0.67657402 | Macrophage: Arf1        |
| 4.93E-05   | -1.3134923 | 0.02  | 0.172 | 0.69747755 | Macrophage: Ms4a1       |
| 5.27E-05   | -1.7341142 | 0     | 0.143 | 0.74629006 | Macrophage: Cxcl9       |
| 5.86E-05   | -0.8336923 | 0.03  | 0.189 | 0.82960664 | Macrophage: Gramd3      |
| 6.04E-05   | 0.26273466 | 0.172 | 0.069 | 0.85533326 | Macrophage: Rasgrp4     |
| 6.30E-05   | -0.7160256 | 0.051 | 0.214 | 0.89164283 | Macrophage: 6-Sep       |
| 7.03E-05   | -0.8571035 | 0.404 | 0.514 | 0.99585901 | Macrophage: Cycs        |
| 7.18E-05   | 0.66928912 | 0.828 | 0.739 | 1          | Macrophage: Ier2        |
| 7.36E-05   | 0.4373996  | 0.99  | 0.96  | 1          | Macrophage: H3f3b       |
| 7.52E-05   | -0.506177  | 0.98  | 0.893 | 1          | Macrophage: Rps21       |
| 7.80E-05   | 0.30579859 | 0.394 | 0.215 | 1          | Macrophage: Tob1        |
| 8.01E-05   | -0.9228725 | 0.091 | 0.25  | 1          | Macrophage: Rabgap1l    |
| 8.27E-05   | -0.7372861 | 0.051 | 0.212 | 1          | Macrophage: Hopx        |
| 9.28E-05   | 0.25037195 | 0.374 | 0.204 | 1          | Macrophage: Uba1        |
| 0.00010163 | -0.805865  | 0.97  | 0.904 | 1          | Macrophage: Rps27       |
| 0.00010243 | -0.4446852 | 0.929 | 0.835 | 1          | Macrophage: Rpl7        |
| 0.00010514 | -1.0881945 | 0.606 | 0.603 | 1          | Macrophage: Arl6ip1     |
| 0.00010587 | -0.8284891 | 0.505 | 0.551 | 1          | Macrophage: Tma7        |
| 0.00010693 | -0.4298548 | 0.99  | 0.864 | 1          | Macrophage: Rpl35       |
| 0.0001113  | 0.39925108 | 0.232 | 0.107 | 1          | Macrophage: Emilin2     |
| 0.000118   | -0.7674269 | 0     | 0.131 | 1          | Macrophage: Izumo1r     |
| 0.00011885 | -1.0048378 | 0.111 | 0.267 | 1          | Macrophage: Ptpn22      |
| 0.00011901 | -0.8740808 | 0.071 | 0.227 | 1          | Macrophage: Dut         |
| 0.00012188 | 0.29179586 | 0.152 | 0.06  | 1          | Macrophage: Rnft1       |
| 0.00012962 | -0.9038013 | 0.475 | 0.517 | 1          | Macrophage: Psmb3       |
| 0.00015224 | -0.8307335 | 0.081 | 0.239 | 1          | Macrophage: Prkca       |
| 0.00015721 | -0.5816696 | 0     | 0.127 | 1          | Macrophage: Gbp4        |
| 0.00017885 | -0.8859223 | 0     | 0.125 | 1          | Macrophage: Gzmk        |
| 0.00018017 | -0.3890627 | 0.97  | 0.851 | 1          | Macrophage: Rpl26       |
| 0.00018556 | -0.8176246 | 0.707 | 0.627 | 1          | Macrophage: Atp5d       |
| 0.00018725 | -0.6238067 | 0.01  | 0.141 | 1          | Macrophage: Sh2d1a      |
| 0.00019181 | -1.0105718 | 0.02  | 0.154 | 1          | Macrophage: Cd19        |
| 0.00019614 | 0.25464292 | 0.162 | 0.066 | 1          | Macrophage: Sirt1       |

|            |            |       |       |                           |
|------------|------------|-------|-------|---------------------------|
| 0.00020755 | -1.0764661 | 0.111 | 0.266 | 1 Macrophage: Bhlhe40     |
| 0.00022183 | 0.2525168  | 0.212 | 0.1   | 1 Macrophage: Arhgap1     |
| 0.0002276  | -0.9116097 | 0.374 | 0.461 | 1 Macrophage: Gabarapl2   |
| 0.00023241 | -0.6752778 | 0.02  | 0.153 | 1 Macrophage: Lamb3       |
| 0.00023334 | -0.7569945 | 0     | 0.121 | 1 Macrophage: Rgs16       |
| 0.00023735 | -1.1730347 | 0.091 | 0.249 | 1 Macrophage: Lmnb1       |
| 0.00025439 | -0.7540216 | 0.01  | 0.136 | 1 Macrophage: Fasl        |
| 0.00025801 | -0.5630148 | 0     | 0.12  | 1 Macrophage: Ppp1r16b    |
| 0.00029158 | -1.0092435 | 0.404 | 0.505 | 1 Macrophage: Cdk2ap2     |
| 0.0002943  | -0.9178102 | 0.071 | 0.214 | 1 Macrophage: Gpr171      |
| 0.00029865 | -0.6873989 | 0.01  | 0.134 | 1 Macrophage: Cd274       |
| 0.00030356 | -0.6503406 | 0.939 | 0.926 | 1 Macrophage: Srgn        |
| 0.00033922 | -0.7652048 | 0.131 | 0.288 | 1 Macrophage: Tes         |
| 0.00034357 | 0.30898364 | 0.101 | 0.035 | 1 Macrophage: Arl10       |
| 0.00034378 | 0.26526148 | 0.444 | 0.261 | 1 Macrophage: Rnh1        |
| 0.00034518 | -0.7170331 | 0.697 | 0.676 | 1 Macrophage: Npm1        |
| 0.00034901 | -0.41327   | 0.96  | 0.889 | 1 Macrophage: Cfl1        |
| 0.00036793 | -0.3746889 | 0.96  | 0.881 | 1 Macrophage: Rpl28       |
| 0.00036947 | -0.5539507 | 0.02  | 0.147 | 1 Macrophage: Spint2      |
| 0.00037243 | -1.0943745 | 0.04  | 0.177 | 1 Macrophage: Fcmr        |
| 0.00039055 | -0.7300425 | 0.051 | 0.185 | 1 Macrophage: Gimap9      |
| 0.00039198 | 0.32016976 | 0.212 | 0.102 | 1 Macrophage: Tet3        |
| 0.00041507 | -0.603223  | 0.01  | 0.129 | 1 Macrophage: Gm19585     |
| 0.00043402 | -1.0653665 | 0.071 | 0.21  | 1 Macrophage: H2-Ob       |
| 0.00043499 | -1.6308884 | 0.111 | 0.249 | 1 Macrophage: Cd79b       |
| 0.00043818 | -0.6445629 | 0.848 | 0.699 | 1 Macrophage: Uqcrh       |
| 0.00044297 | -0.8191463 | 0.091 | 0.228 | 1 Macrophage: D16Ertd472e |
| 0.00044912 | -0.5160756 | 0.01  | 0.128 | 1 Macrophage: Mgst2       |
| 0.00047228 | -0.5804125 | 0.02  | 0.142 | 1 Macrophage: Hsd11b1     |
| 0.00048146 | -0.9340385 | 0.384 | 0.49  | 1 Macrophage: Ezr         |
| 0.00048358 | -0.9460384 | 0.222 | 0.353 | 1 Macrophage: Crem        |
| 0.00049099 | -0.521079  | 0     | 0.11  | 1 Macrophage: Hip1r       |
| 0.0004916  | -1.3524228 | 0.071 | 0.203 | 1 Macrophage: Ctla2a      |
| 0.00050637 | -0.6956897 | 0.717 | 0.641 | 1 Macrophage: Cox6c       |
| 0.00050899 | -0.6796202 | 0     | 0.109 | 1 Macrophage: Ccr8        |
| 0.00053598 | -0.608013  | 0.586 | 0.642 | 1 Macrophage: S100a10     |
| 0.00053678 | -0.5703148 | 0.02  | 0.139 | 1 Macrophage: Rhof        |
| 0.00054385 | -0.8612695 | 0.343 | 0.435 | 1 Macrophage: Csnk2b      |
| 0.000561   | -0.4666483 | 0.455 | 0.269 | 1 Macrophage: Il1b        |
| 0.00056337 | -0.4763251 | 0.98  | 0.863 | 1 Macrophage: Rps19       |
| 0.00056743 | -0.5837854 | 0.01  | 0.125 | 1 Macrophage: Traf4       |
| 0.00062244 | -0.9160584 | 0.01  | 0.122 | 1 Macrophage: Mzb1        |
| 0.00062564 | 0.2694226  | 0.394 | 0.246 | 1 Macrophage: Csde1       |
| 0.00064046 | 0.33507227 | 0.232 | 0.119 | 1 Macrophage: Atp6v1h     |
| 0.00066138 | -0.6202899 | 0.576 | 0.602 | 1 Macrophage: Sec61b      |
| 0.00066617 | -0.8383022 | 0     | 0.105 | 1 Macrophage: Ly6i        |
| 0.00067097 | -0.4445168 | 0.98  | 0.887 | 1 Macrophage: Ptma        |
| 0.00068953 | -0.8552614 | 0.111 | 0.265 | 1 Macrophage: Rgcc        |

|            |            |       |       |                         |
|------------|------------|-------|-------|-------------------------|
| 0.00069165 | -0.4755001 | 0.01  | 0.121 | 1 Macrophage: Impa2     |
| 0.00070462 | 0.46072111 | 0.192 | 0.093 | 1 Macrophage: Slc20a1   |
| 0.00072899 | -0.7694418 | 0.505 | 0.543 | 1 Macrophage: Edf1      |
| 0.00073024 | 0.27971866 | 0.111 | 0.042 | 1 Macrophage: Mroh1     |
| 0.00076393 | -0.5228123 | 0.889 | 0.788 | 1 Macrophage: Rpl36a    |
| 0.00080774 | -0.7685135 | 0.354 | 0.457 | 1 Macrophage: Tax1bp1   |
| 0.00088201 | -0.7658296 | 0.03  | 0.147 | 1 Macrophage: H2-Oa     |
| 0.00089381 | -0.6680701 | 0.687 | 0.633 | 1 Macrophage: Ppp1ca    |
| 0.00090263 | -0.573061  | 0.909 | 0.799 | 1 Macrophage: Myl6      |
| 0.0009482  | -0.4437093 | 0.01  | 0.116 | 1 Macrophage: Lime1     |
| 0.00095827 | -0.7954424 | 0.313 | 0.418 | 1 Macrophage: Psmb5     |
| 0.00095925 | -0.6123215 | 0.03  | 0.144 | 1 Macrophage: Mllt3     |
| 0.00096863 | -0.6675682 | 0     | 0.1   | 1 Macrophage: Klrc1     |
| 0.00101156 | -0.5274559 | 0.808 | 0.715 | 1 Macrophage: Pfdn5     |
| 0.00102801 | -0.980241  | 0.152 | 0.299 | 1 Macrophage: Mxd1      |
| 0.00103377 | -0.8528841 | 0.192 | 0.323 | 1 Macrophage: Rapgef6   |
| 0.0010421  | -0.4787386 | 0.99  | 0.857 | 1 Macrophage: Rpl17     |
| 0.00104393 | -0.7679291 | 0.323 | 0.468 | 1 Macrophage: Dusp2     |
| 0.00105401 | -0.784589  | 0.465 | 0.519 | 1 Macrophage: H2afj     |
| 0.00107313 | 0.6140758  | 0.131 | 0.057 | 1 Macrophage: Tnip3     |
| 0.00107713 | -0.7167606 | 0.01  | 0.114 | 1 Macrophage: Serpinb6b |
| 0.00108127 | -0.9325708 | 0.414 | 0.489 | 1 Macrophage: Mif       |
| 0.00110551 | -0.7529908 | 0.01  | 0.114 | 1 Macrophage: Ikzf2     |
| 0.00113386 | -0.5446842 | 0.01  | 0.115 | 1 Macrophage: Cd226     |
| 0.00114654 | -0.6581271 | 0.081 | 0.206 | 1 Macrophage: Dnajc9    |
| 0.00116759 | -0.4365148 | 0.899 | 0.757 | 1 Macrophage: Atp5e     |
| 0.00119561 | -4.3273954 | 0.04  | 0.156 | 1 Macrophage: S100a8    |
| 0.00119986 | -0.7445336 | 0.182 | 0.31  | 1 Macrophage: Pgk1      |
| 0.00121172 | -1.046698  | 0.071 | 0.188 | 1 Macrophage: Cd55      |
| 0.00122688 | -0.8692931 | 0.131 | 0.264 | 1 Macrophage: Socs1     |
| 0.00123804 | -0.7420227 | 0.242 | 0.367 | 1 Macrophage: H2-T22    |
| 0.00129129 | -0.544547  | 0.01  | 0.111 | 1 Macrophage: Tbx21     |
| 0.00129651 | -1.6774216 | 0.01  | 0.112 | 1 Macrophage: Ifitm1    |
| 0.00131226 | -4.5526494 | 0.051 | 0.168 | 1 Macrophage: S100a9    |
| 0.00132447 | -0.7170325 | 0.111 | 0.236 | 1 Macrophage: 9-Sep     |
| 0.00134762 | -0.5070397 | 0.808 | 0.754 | 1 Macrophage: Rpl5      |
| 0.00136752 | -0.7284754 | 0.01  | 0.11  | 1 Macrophage: Scd1      |
| 0.00142776 | -0.9314891 | 0.081 | 0.206 | 1 Macrophage: Dgat1     |
| 0.00145943 | -0.7913734 | 0.646 | 0.615 | 1 Macrophage: Ldha      |
| 0.00147303 | -0.6894075 | 0.475 | 0.517 | 1 Macrophage: Psmb1     |
| 0.00147627 | -0.6580403 | 0.111 | 0.24  | 1 Macrophage: Atg101    |
| 0.00150249 | -0.2608302 | 0.515 | 0.314 | 1 Macrophage: Irf8      |
| 0.00153803 | -1.4065465 | 0.121 | 0.237 | 1 Macrophage: H2-DMb2   |
| 0.00160871 | 0.29247241 | 0.162 | 0.078 | 1 Macrophage: Tor3a     |
| 0.00168288 | -0.6070826 | 0.04  | 0.152 | 1 Macrophage: S1pr4     |
| 0.00169489 | 0.27882181 | 0.566 | 0.399 | 1 Macrophage: Slfn2     |
| 0.00171528 | -0.3586534 | 0.636 | 0.375 | 1 Macrophage: Ifi30     |
| 0.00175392 | -0.4925019 | 0.02  | 0.123 | 1 Macrophage: Sla2      |



|            |            |       |       |                       |
|------------|------------|-------|-------|-----------------------|
| 0.00179749 | -0.7570573 | 0.424 | 0.482 | 1 Macrophage: Rbx1    |
| 0.00179823 | -0.7597514 | 0.636 | 0.581 | 1 Macrophage: Ndufa13 |
| 0.00180348 | -0.9259377 | 0.515 | 0.541 | 1 Macrophage: Prr13   |
| 0.00182419 | -0.6709386 | 0.242 | 0.364 | 1 Macrophage: Polr2l  |
| 0.00186923 | -0.3979136 | 0.02  | 0.122 | 1 Macrophage: Rpp25l  |
| 0.00187524 | -0.8661053 | 0.101 | 0.221 | 1 Macrophage: Sorl1   |
| 0.00189169 | -0.7164327 | 0.374 | 0.453 | 1 Macrophage: Nop10   |
| 0.00191536 | -0.6025592 | 0.03  | 0.135 | 1 Macrophage: Arap2   |
| 0.00196023 | -0.5332982 | 0.03  | 0.135 | 1 Macrophage: Fam102a |
| 0.00199738 | -0.7908257 | 0.02  | 0.119 | 1 Macrophage: Fcrla   |
| 0.00207045 | 0.69249234 | 0.222 | 0.118 | 1 Macrophage: Irgm1   |
| 0.0020914  | -0.6025346 | 0.04  | 0.148 | 1 Macrophage: Ccdc88c |
| 0.00211981 | -0.6144339 | 0.636 | 0.628 | 1 Macrophage: Ubl5    |
| 0.00217743 | 0.32652808 | 0.394 | 0.252 | 1 Macrophage: Gpr65   |
| 0.00220257 | -0.6836861 | 0.091 | 0.215 | 1 Macrophage: Traf1   |
| 0.00220308 | -0.5442317 | 0.01  | 0.103 | 1 Macrophage: Sytl3   |
| 0.00222458 | -0.6476265 | 0.667 | 0.602 | 1 Macrophage: Eif3k   |
| 0.00222755 | 0.3926026  | 0.283 | 0.16  | 1 Macrophage: Sgk1    |
| 0.00224114 | -1.1304461 | 0.172 | 0.302 | 1 Macrophage: Isg15   |
| 0.0023023  | -0.649154  | 0.162 | 0.291 | 1 Macrophage: Acp5    |
| 0.00231475 | -1.0001927 | 0.293 | 0.388 | 1 Macrophage: Itga4   |
| 0.00235156 | -0.6774722 | 0.737 | 0.642 | 1 Macrophage: Sumo2   |
| 0.0023585  | -0.9394939 | 0.616 | 0.619 | 1 Macrophage: Stk17b  |
| 0.00237265 | -0.6841346 | 0.717 | 0.668 | 1 Macrophage: Aldoa   |
| 0.00240158 | -0.4753501 | 0.919 | 0.753 | 1 Macrophage: Rpl9    |
| 0.00240894 | 0.30236418 | 0.121 | 0.053 | 1 Macrophage: Gart    |
| 0.00247358 | -0.7948089 | 0.374 | 0.44  | 1 Macrophage: Krtcap2 |
| 0.00248589 | -0.6596507 | 0.051 | 0.158 | 1 Macrophage: Gpr18   |
| 0.00249363 | -0.7075746 | 0.444 | 0.494 | 1 Macrophage: Sri     |
| 0.00256565 | -0.7807851 | 0.253 | 0.348 | 1 Macrophage: Higd1a  |
| 0.00258102 | -0.7680354 | 0.455 | 0.48  | 1 Macrophage: Psma2   |
| 0.00258432 | -0.6949212 | 0.01  | 0.101 | 1 Macrophage: Klre1   |
| 0.00263203 | -0.6612075 | 0.071 | 0.181 | 1 Macrophage: Chfr    |
| 0.00264463 | -0.7500731 | 0.384 | 0.456 | 1 Macrophage: Supt4a  |
| 0.00270345 | -0.8275986 | 0.434 | 0.477 | 1 Macrophage: Gpsm3   |
| 0.00272967 | -0.5019577 | 0.02  | 0.115 | 1 Macrophage: Grap2   |
| 0.00273592 | -0.7689245 | 0.394 | 0.446 | 1 Macrophage: Mdh2    |
| 0.00276255 | -0.6545489 | 0.242 | 0.36  | 1 Macrophage: Pebp1   |
| 0.00277381 | -0.3933885 | 0.04  | 0.151 | 1 Macrophage: Ddit4   |
| 0.00281728 | -0.7089038 | 0.374 | 0.447 | 1 Macrophage: Eif3i   |
| 0.00285063 | -0.9486836 | 0.101 | 0.21  | 1 Macrophage: Satb1   |
| 0.00286588 | -0.3537737 | 0.01  | 0.1   | 1 Macrophage: Panx1   |
| 0.00288107 | -0.4985597 | 0.03  | 0.13  | 1 Macrophage: Cers4   |
| 0.00297428 | -0.9941976 | 0.455 | 0.494 | 1 Macrophage: Samhd1  |
| 0.00299476 | -0.5956534 | 0.172 | 0.295 | 1 Macrophage: Pcd6    |
| 0.00304467 | -0.7001279 | 0.111 | 0.228 | 1 Macrophage: Cblb    |
| 0.00307073 | -0.4738794 | 0.02  | 0.113 | 1 Macrophage: Jakmip1 |
| 0.00314808 | -0.5733461 | 0.03  | 0.128 | 1 Macrophage: Cd6     |

|            |            |       |       |                        |
|------------|------------|-------|-------|------------------------|
| 0.00331919 | -0.6993681 | 0.121 | 0.235 | 1 Macrophage: Psip1    |
| 0.00352297 | -0.6279182 | 0.141 | 0.252 | 1 Macrophage: Ndufs6   |
| 0.00353536 | -0.8487951 | 0.313 | 0.391 | 1 Macrophage: Tomm6    |
| 0.00357098 | -0.6375865 | 0.717 | 0.631 | 1 Macrophage: Eif3h    |
| 0.00358919 | -0.9522869 | 0.253 | 0.352 | 1 Macrophage: Stat1    |
| 0.00366589 | -0.7097062 | 0.889 | 0.734 | 1 Macrophage: Fxyd5    |
| 0.00367344 | -0.6577724 | 0.404 | 0.476 | 1 Macrophage: Srp9     |
| 0.00367974 | -0.4584821 | 0.949 | 0.844 | 1 Macrophage: Calm1    |
| 0.00373436 | -0.9003961 | 0.283 | 0.389 | 1 Macrophage: Samsn1   |
| 0.00383017 | -0.3796925 | 0.98  | 0.878 | 1 Macrophage: Rpl38    |
| 0.00387904 | -0.5872046 | 0.768 | 0.685 | 1 Macrophage: Eif5a    |
| 0.00397893 | -0.4182847 | 0.03  | 0.127 | 1 Macrophage: Klk8     |
| 0.00399142 | -0.5260566 | 0.091 | 0.2   | 1 Macrophage: Cetn2    |
| 0.00408161 | -0.542879  | 0.101 | 0.215 | 1 Macrophage: Srpk1    |
| 0.00421363 | -0.373863  | 0.02  | 0.11  | 1 Macrophage: Phgdh    |
| 0.00427049 | -0.697463  | 0.02  | 0.109 | 1 Macrophage: Cd300lf  |
| 0.00443514 | -0.7693934 | 0.03  | 0.12  | 1 Macrophage: Blk      |
| 0.00444369 | -0.4481265 | 0.03  | 0.123 | 1 Macrophage: Zdhhc18  |
| 0.00474987 | -0.4961493 | 0.071 | 0.175 | 1 Macrophage: Chchd3   |
| 0.00476122 | -0.7223874 | 0.263 | 0.356 | 1 Macrophage: Rp9      |
| 0.00483672 | 0.37743134 | 0.162 | 0.087 | 1 Macrophage: Eid1     |
| 0.00486729 | -0.646442  | 0.222 | 0.325 | 1 Macrophage: Mettl23  |
| 0.00488123 | -0.7261978 | 0.545 | 0.547 | 1 Macrophage: Dad1     |
| 0.00495198 | -0.6675672 | 0.071 | 0.173 | 1 Macrophage: AU020206 |
| 0.00496237 | -0.6739635 | 0.667 | 0.634 | 1 Macrophage: Cnbp     |
| 0.00498799 | -0.7182834 | 0.081 | 0.185 | 1 Macrophage: Nr4a3    |
| 0.00504643 | -0.7231051 | 0.283 | 0.372 | 1 Macrophage: Nme1     |
| 0.00512096 | -0.4946167 | 0.02  | 0.107 | 1 Macrophage: Cxcr3    |
| 0.00522386 | -0.7632525 | 0.293 | 0.379 | 1 Macrophage: Leprotl1 |
| 0.00527436 | -0.6953381 | 0.444 | 0.477 | 1 Macrophage: Arpp19   |
| 0.00530941 | -0.7625612 | 0.556 | 0.532 | 1 Macrophage: Prelid1  |
| 0.00530991 | -0.512947  | 0.051 | 0.146 | 1 Macrophage: Map4k1   |
| 0.00557221 | -0.4473962 | 0.02  | 0.105 | 1 Macrophage: Bcl11b   |
| 0.00558859 | -0.6406675 | 0.586 | 0.581 | 1 Macrophage: Slc25a5  |
| 0.00560318 | -0.6179339 | 0.727 | 0.626 | 1 Macrophage: Atp5h    |
| 0.00568601 | -0.5325067 | 0.02  | 0.105 | 1 Macrophage: B3gnt5   |
| 0.00571121 | -0.6923574 | 0.172 | 0.273 | 1 Macrophage: Arpc5l   |
| 0.00576667 | -0.6502096 | 0.545 | 0.537 | 1 Macrophage: Cox7a2   |
| 0.00584325 | -0.5112704 | 0.101 | 0.206 | 1 Macrophage: Pin1     |
| 0.00585858 | -0.883241  | 0.283 | 0.373 | 1 Macrophage: Dennd4a  |
| 0.00587951 | -0.5841535 | 0.071 | 0.172 | 1 Macrophage: Srpk2    |
| 0.00590201 | -0.6760665 | 0.051 | 0.145 | 1 Macrophage: Lyst     |
| 0.00605657 | -0.3148409 | 0.99  | 0.991 | 1 Macrophage: Actb     |
| 0.00614104 | -0.500683  | 0.111 | 0.221 | 1 Macrophage: Gm9844   |
| 0.00653154 | -0.6597675 | 0.596 | 0.563 | 1 Macrophage: Hint1    |
| 0.00664459 | -0.7501733 | 0.111 | 0.211 | 1 Macrophage: Malt1    |
| 0.00664883 | -0.6159817 | 0.182 | 0.285 | 1 Macrophage: Mrps16   |
| 0.00670203 | -0.3329984 | 0.929 | 0.842 | 1 Macrophage: Serf2    |

|            |            |       |       |                          |
|------------|------------|-------|-------|--------------------------|
| 0.00673077 | -0.5905682 | 0.505 | 0.525 | 1 Macrophage: Snrpe      |
| 0.00679171 | -0.7826455 | 0.263 | 0.345 | 1 Macrophage: B4galnt1   |
| 0.00693054 | -0.8758746 | 0.424 | 0.463 | 1 Macrophage: Txn1       |
| 0.00700295 | -0.4579595 | 0.051 | 0.145 | 1 Macrophage: 5430416N02 |
| 0.00704818 | -0.3817114 | 0.04  | 0.131 | 1 Macrophage: Xpa        |
| 0.00709251 | -0.8276164 | 0.141 | 0.248 | 1 Macrophage: Hilpda     |
| 0.00710121 | -1.0151502 | 0.556 | 0.537 | 1 Macrophage: Taldo1     |
| 0.00712605 | -0.5654476 | 0.152 | 0.259 | 1 Macrophage: Mrpl18     |
| 0.00715745 | -0.5577654 | 0.03  | 0.117 | 1 Macrophage: Hist1h1e   |
| 0.00733081 | 0.34300369 | 0.242 | 0.148 | 1 Macrophage: Arl4c      |
| 0.00740022 | -0.4369423 | 0.03  | 0.114 | 1 Macrophage: Fam189b    |
| 0.0075026  | 0.3546504  | 0.495 | 0.359 | 1 Macrophage: Hsph1      |
| 0.00774985 | -0.3833417 | 0.02  | 0.1   | 1 Macrophage: Rab19      |
| 0.0078062  | -1.043552  | 0.111 | 0.213 | 1 Macrophage: Hist1h2ap  |
| 0.00784716 | -0.4679594 | 0.101 | 0.205 | 1 Macrophage: Nubp1      |
| 0.00787589 | -0.6337998 | 0.212 | 0.308 | 1 Macrophage: Timm23     |
| 0.00793663 | -0.6027591 | 0.667 | 0.605 | 1 Macrophage: Arf5       |
| 0.00799708 | -0.5633096 | 0.051 | 0.139 | 1 Macrophage: Chchd10    |
| 0.00819732 | -0.6510424 | 0.232 | 0.329 | 1 Macrophage: Pdpf       |
| 0.00821029 | -0.4725387 | 0.03  | 0.113 | 1 Macrophage: Cnn3       |
| 0.00824325 | -0.6253266 | 0.212 | 0.308 | 1 Macrophage: Mrpl54     |
| 0.00829506 | -1.6305319 | 0.071 | 0.161 | 1 Macrophage: Hp         |
| 0.00843598 | -0.7275493 | 0.091 | 0.194 | 1 Macrophage: Cd24a      |
| 0.00850119 | -0.4749686 | 0.737 | 0.658 | 1 Macrophage: Atp5g2     |
| 0.00855619 | -0.6454151 | 0.212 | 0.306 | 1 Macrophage: Fkbp3      |
| 0.00858317 | -0.6346297 | 0.616 | 0.579 | 1 Macrophage: Snrpg      |
| 0.00860657 | -0.3098375 | 0.99  | 0.905 | 1 Macrophage: Rplp1      |
| 0.00884384 | -0.5171951 | 0.051 | 0.138 | 1 Macrophage: Rnase6     |
| 0.0089254  | -0.7289001 | 0.182 | 0.28  | 1 Macrophage: Cd82       |
| 0.00895325 | -0.5949304 | 0.414 | 0.471 | 1 Macrophage: Sf3b6      |
| 0.00905709 | -0.4520611 | 0.04  | 0.126 | 1 Macrophage: Sesn3      |
| 0.00931516 | -0.4682392 | 0.081 | 0.174 | 1 Macrophage: Ubl7       |
| 0.0097604  | -0.7705566 | 0.768 | 0.676 | 1 Macrophage: Ptprc      |
| 0.00996834 | -0.5903621 | 0.071 | 0.16  | 1 Macrophage: Map4k2     |
| 0.00997927 | -0.6749929 | 0.111 | 0.206 | 1 Macrophage: Nfatc3     |





















Rik









Rik



Rik







Rik









lik







Rik

rik

























Rik

Rik

























ik

Rik









rik

rik



ik

Rik

Rik









rik





30r

Rik

Rik





























ik

rik













































Rik

Rik

Rik









Rik

Rik  
Rik



'Rik





Rik

Rik







Rik











ik

rik

rik

























rik

Rik

Rik

Rik

rik



rik





Rik



Rik

Rik













rik

50r

Rik

Rik

Rik



Rik

ik

Rik



.Rik

Rik

Rik

lik

Rik









Rik













Rik







Rik









ik







Rik







































rik









rik  
Rik















Rik

Rik







rik







rik









Rik
