# Supplementary material for: The Regulation Network of Glycerolipid Metabolism as Coregulators of Immunotherapy-Related Myocarditis
Source: Hindawi journal article supplement (doi:10.1155/2023/8774971), 2023-06-21
Supplement: f2 [file 8774971.f2.pdf]

Table S2

| gene           | p_val     | avg_log2FC   | pct.1 | pct.2 | p_val_adj | cluster                          |
|----------------|-----------|--------------|-------|-------|-----------|----------------------------------|
| <b>Ccl5</b>    | 2.67E-110 | -2.57694129  | 0.018 | 0.416 | 3.78E-106 | T cells, CD8+, naive, stimulated |
| <b>Rps29</b>   | 9.28E-105 | 1.320332606  | 0.999 | 0.852 | 1.31E-100 | T cells, CD8+, naive, stimulated |
| <b>Eef1a1</b>  | 8.78E-89  | 1.057047483  | 0.999 | 0.872 | 1.24E-84  | T cells, CD8+, naive, stimulated |
| <b>Rps27</b>   | 6.69E-85  | 1.048338516  | 1     | 0.889 | 9.47E-81  | T cells, CD8+, naive, stimulated |
| <b>Btg1</b>    | 6.82E-78  | 1.651852945  | 0.975 | 0.678 | 9.65E-74  | T cells, CD8+, naive, stimulated |
| <b>Rpl35a</b>  | 2.71E-75  | 0.943064313  | 1     | 0.815 | 3.84E-71  | T cells, CD8+, naive, stimulated |
| <b>Rps28</b>   | 1.21E-73  | 0.990717655  | 0.999 | 0.819 | 1.72E-69  | T cells, CD8+, naive, stimulated |
| <b>Klf2</b>    | 1.85E-70  | 1.717577584  | 0.965 | 0.695 | 2.62E-66  | T cells, CD8+, naive, stimulated |
| <b>Hspa8</b>   | 1.66E-60  | 1.736227339  | 0.961 | 0.701 | 2.36E-56  | T cells, CD8+, naive, stimulated |
| <b>Jund</b>    | 2.24E-58  | 1.227875053  | 0.979 | 0.711 | 3.17E-54  | T cells, CD8+, naive, stimulated |
| <b>Nr4a1</b>   | 3.08E-58  | 1.766411709  | 0.877 | 0.49  | 4.35E-54  | T cells, CD8+, naive, stimulated |
| <b>Rpl38</b>   | 4.44E-56  | 0.823274285  | 0.999 | 0.832 | 6.28E-52  | T cells, CD8+, naive, stimulated |
| <b>Eef2</b>    | 1.53E-52  | 1.004865677  | 0.974 | 0.601 | 2.17E-48  | T cells, CD8+, naive, stimulated |
| <b>Tsc22d3</b> | 2.05E-50  | 1.26214362   | 0.891 | 0.44  | 2.91E-46  | T cells, CD8+, naive, stimulated |
| <b>Dusp2</b>   | 3.08E-48  | 1.215770532  | 0.784 | 0.305 | 4.36E-44  | T cells, CD8+, naive, stimulated |
| <b>Cxcr4</b>   | 2.17E-47  | 1.55858789   | 0.629 | 0.144 | 3.07E-43  | T cells, CD8+, naive, stimulated |
| <b>Serp1</b>   | 1.16E-46  | 1.098078432  | 0.889 | 0.456 | 1.65E-42  | T cells, CD8+, naive, stimulated |
| <b>Junb</b>    | 9.55E-46  | 1.279984488  | 0.947 | 0.711 | 1.35E-41  | T cells, CD8+, naive, stimulated |
| <b>Ier5</b>    | 3.37E-39  | 1.192274244  | 0.731 | 0.275 | 4.77E-35  | T cells, CD8+, naive, stimulated |
| <b>Stk17b</b>  | 3.61E-39  | 0.983127329  | 0.868 | 0.463 | 5.1E-35   | T cells, CD8+, naive, stimulated |
| <b>Pcbp2</b>   | 8.34E-38  | 1.023829488  | 0.809 | 0.346 | 1.18E-33  | T cells, CD8+, naive, stimulated |
| <b>Cytip</b>   | 1.07E-37  | 1.035886887  | 0.795 | 0.349 | 1.51E-33  | T cells, CD8+, naive, stimulated |
| <b>Hnrnpf</b>  | 4.54E-37  | 1.136607794  | 0.737 | 0.309 | 6.43E-33  | T cells, CD8+, naive, stimulated |
| <b>Dazap2</b>  | 4.89E-36  | 1.135560836  | 0.698 | 0.285 | 6.93E-32  | T cells, CD8+, naive, stimulated |
| <b>Ccr7</b>    | 1.59E-35  | 0.986347051  | 0.9   | 0.574 | 2.26E-31  | T cells, CD8+, naive, stimulated |
| <b>Rap1b</b>   | 6.45E-35  | 1.044720354  | 0.7   | 0.268 | 9.13E-31  | T cells, CD8+, naive, stimulated |
| <b>Fam107b</b> | 8.83E-35  | 1.151250057  | 0.729 | 0.326 | 1.25E-30  | T cells, CD8+, naive, stimulated |
| <b>Pabpc1</b>  | 9.48E-35  | 0.885346916  | 0.885 | 0.47  | 1.34E-30  | T cells, CD8+, naive, stimulated |
| <b>Ywhaz</b>   | 1.21E-34  | 0.925518621  | 0.866 | 0.443 | 1.72E-30  | T cells, CD8+, naive, stimulated |
| <b>Rhob</b>    | 2.19E-34  | 1.56832249   | 0.547 | 0.151 | 3.1E-30   | T cells, CD8+, naive, stimulated |
| <b>Rps27rt</b> | 7.8E-34   | -1.706681342 | 0.29  | 0.56  | 1.1E-29   | T cells, CD8+, naive, stimulated |
| <b>Hspa1a</b>  | 3.85E-33  | 2.05564667   | 0.599 | 0.255 | 5.46E-29  | T cells, CD8+, naive, stimulated |

|                |          |              |       |       |          |                                  |
|----------------|----------|--------------|-------|-------|----------|----------------------------------|
| <b>Actg1</b>   | 7.58E-33 | 0.816803539  | 0.956 | 0.628 | 1.07E-28 | T cells, CD8+, naive, stimulated |
| <b>H3f3b</b>   | 1.02E-31 | 0.658988562  | 0.996 | 0.93  | 1.44E-27 | T cells, CD8+, naive, stimulated |
| <b>Zfp36</b>   | 1.12E-30 | 0.970859392  | 0.81  | 0.413 | 1.58E-26 | T cells, CD8+, naive, stimulated |
| <b>Dnajb1</b>  | 4.34E-30 | 1.782699779  | 0.717 | 0.393 | 6.14E-26 | T cells, CD8+, naive, stimulated |
| <b>Gnas</b>    | 8.22E-30 | 0.93124452   | 0.768 | 0.383 | 1.16E-25 | T cells, CD8+, naive, stimulated |
| <b>Dusp1</b>   | 2.42E-29 | 1.167959951  | 0.581 | 0.191 | 3.43E-25 | T cells, CD8+, naive, stimulated |
| <b>Fcer2a</b>  | 2.9E-29  | 1.00936175   | 0.609 | 0.198 | 4.11E-25 | T cells, CD8+, naive, stimulated |
| <b>Cnbp</b>    | 3.07E-29 | 0.781639534  | 0.861 | 0.466 | 4.35E-25 | T cells, CD8+, naive, stimulated |
| <b>Rpl17</b>   | 2.27E-28 | 0.57111111   | 0.989 | 0.822 | 3.22E-24 | T cells, CD8+, naive, stimulated |
| <b>Zfp36l2</b> | 3.95E-28 | 1.051677598  | 0.595 | 0.218 | 5.59E-24 | T cells, CD8+, naive, stimulated |
| <b>Serinc3</b> | 4.55E-28 | 0.832250841  | 0.804 | 0.393 | 6.45E-24 | T cells, CD8+, naive, stimulated |
| <b>mt-Co2</b>  | 7.65E-28 | -0.939430346 | 0.999 | 0.997 | 1.08E-23 | T cells, CD8+, naive, stimulated |
| <b>Ets1</b>    | 2.06E-27 | 0.616093613  | 0.787 | 0.376 | 2.92E-23 | T cells, CD8+, naive, stimulated |
| <b>mt-Nd3</b>  | 2.44E-27 | 0.547278595  | 0.638 | 0.242 | 3.46E-23 | T cells, CD8+, naive, stimulated |
| <b>S100a6</b>  | 2.76E-26 | -2.3609815   | 0.051 | 0.228 | 3.91E-22 | T cells, CD8+, naive, stimulated |
| <b>Snx5</b>    | 8.25E-26 | 0.846302781  | 0.68  | 0.292 | 1.17E-21 | T cells, CD8+, naive, stimulated |
| <b>Pnrc1</b>   | 3.17E-25 | 0.758882531  | 0.832 | 0.507 | 4.49E-21 | T cells, CD8+, naive, stimulated |
| <b>Rps21</b>   | 3.35E-25 | 0.492726622  | 0.999 | 0.872 | 4.74E-21 | T cells, CD8+, naive, stimulated |
| <b>Hnrnpk</b>  | 4.86E-25 | 0.765541753  | 0.68  | 0.305 | 6.88E-21 | T cells, CD8+, naive, stimulated |
| <b>Ptp4a3</b>  | 5.33E-25 | 0.895973202  | 0.577 | 0.211 | 7.54E-21 | T cells, CD8+, naive, stimulated |
| <b>Tcp11l2</b> | 2.54E-24 | 1.054606047  | 0.527 | 0.185 | 3.6E-20  | T cells, CD8+, naive, stimulated |
| <b>mt-Co3</b>  | 7.82E-24 | -0.956574842 | 0.999 | 0.993 | 1.11E-19 | T cells, CD8+, naive, stimulated |
| <b>Ubc</b>     | 8.87E-24 | 0.770216163  | 0.805 | 0.473 | 1.26E-19 | T cells, CD8+, naive, stimulated |
| <b>Arf6</b>    | 2.08E-23 | 0.784339002  | 0.648 | 0.279 | 2.95E-19 | T cells, CD8+, naive, stimulated |
| <b>Tgfb1</b>   | 2.22E-23 | 0.795825552  | 0.625 | 0.272 | 3.14E-19 | T cells, CD8+, naive, stimulated |
| <b>Hsph1</b>   | 2.37E-23 | 0.908964662  | 0.577 | 0.245 | 3.36E-19 | T cells, CD8+, naive, stimulated |
| <b>Ddx5</b>    | 3.05E-23 | 0.452755171  | 0.965 | 0.698 | 4.32E-19 | T cells, CD8+, naive, stimulated |
| <b>Ezr</b>     | 3.64E-23 | 0.678463216  | 0.741 | 0.366 | 5.15E-19 | T cells, CD8+, naive, stimulated |
| <b>Vps37b</b>  | 6.56E-23 | 0.851358334  | 0.692 | 0.346 | 9.28E-19 | T cells, CD8+, naive, stimulated |
| <b>Rhoa</b>    | 1.09E-22 | 0.669972584  | 0.82  | 0.443 | 1.54E-18 | T cells, CD8+, naive, stimulated |
| <b>P2ry10</b>  | 1.61E-22 | 0.878483585  | 0.521 | 0.191 | 2.28E-18 | T cells, CD8+, naive, stimulated |
| <b>Klf4</b>    | 1.76E-22 | 1.299928769  | 0.498 | 0.188 | 2.48E-18 | T cells, CD8+, naive, stimulated |
| <b>Ifi30</b>   | 2.02E-22 | -1.473568177 | 0.376 | 0.581 | 2.86E-18 | T cells, CD8+, naive, stimulated |
| <b>Klf6</b>    | 6.1E-22  | 0.799691059  | 0.712 | 0.366 | 8.64E-18 | T cells, CD8+, naive, stimulated |
| <b>Rplp0</b>   | 1.68E-21 | -0.604433982 | 0.994 | 0.876 | 2.38E-17 | T cells, CD8+, naive, stimulated |

|                 |          |              |       |       |          |                                  |
|-----------------|----------|--------------|-------|-------|----------|----------------------------------|
| <b>Lgals1</b>   | 2.65E-21 | -0.999000253 | 0.049 | 0.205 | 3.76E-17 | T cells, CD8+, naive, stimulated |
| <b>Plk2</b>     | 2.81E-21 | 1.279021761  | 0.358 | 0.07  | 3.98E-17 | T cells, CD8+, naive, stimulated |
| <b>Cfap43</b>   | 4.31E-21 | 0.855647886  | 0.316 | 0.044 | 6.1E-17  | T cells, CD8+, naive, stimulated |
| <b>Hspa1b</b>   | 7.9E-21  | 1.036109668  | 0.617 | 0.326 | 1.12E-16 | T cells, CD8+, naive, stimulated |
| <b>Rpsa</b>     | 1.03E-20 | -0.452577192 | 0.997 | 0.906 | 1.46E-16 | T cells, CD8+, naive, stimulated |
| <b>Add3</b>     | 1.26E-20 | 0.716527062  | 0.498 | 0.178 | 1.78E-16 | T cells, CD8+, naive, stimulated |
| <b>Tonsl</b>    | 1.81E-20 | 1.040761314  | 0.345 | 0.087 | 2.56E-16 | T cells, CD8+, naive, stimulated |
| <b>Pcbp1</b>    | 3.37E-20 | 0.751012974  | 0.662 | 0.336 | 4.77E-16 | T cells, CD8+, naive, stimulated |
| <b>Bach2</b>    | 1.46E-19 | 0.541265186  | 0.476 | 0.154 | 2.06E-15 | T cells, CD8+, naive, stimulated |
| <b>Cnn3</b>     | 1.47E-19 | 1.031767429  | 0.309 | 0.057 | 2.08E-15 | T cells, CD8+, naive, stimulated |
| <b>Csk</b>      | 2.24E-19 | 0.742361219  | 0.49  | 0.191 | 3.17E-15 | T cells, CD8+, naive, stimulated |
| <b>Snn</b>      | 2.33E-19 | 0.915428302  | 0.434 | 0.144 | 3.3E-15  | T cells, CD8+, naive, stimulated |
| <b>Tgif1</b>    | 2.4E-19  | 0.867635599  | 0.498 | 0.205 | 3.39E-15 | T cells, CD8+, naive, stimulated |
| <b>Hmgn2</b>    | 9.55E-19 | 0.866827449  | 0.514 | 0.221 | 1.35E-14 | T cells, CD8+, naive, stimulated |
| <b>Ube2d3</b>   | 9.64E-19 | 0.640537009  | 0.7   | 0.366 | 1.37E-14 | T cells, CD8+, naive, stimulated |
| <b>Sqstm1</b>   | 1.58E-18 | 0.652887275  | 0.638 | 0.312 | 2.24E-14 | T cells, CD8+, naive, stimulated |
| <b>Anxa2</b>    | 1.87E-18 | -0.636852009 | 0.012 | 0.104 | 2.65E-14 | T cells, CD8+, naive, stimulated |
| <b>Rbm38</b>    | 2.49E-18 | 0.632048661  | 0.52  | 0.218 | 3.53E-14 | T cells, CD8+, naive, stimulated |
| <b>Syk</b>      | 2.58E-18 | 0.42112303   | 0.595 | 0.248 | 3.65E-14 | T cells, CD8+, naive, stimulated |
| <b>Arf1</b>     | 2.68E-18 | 0.547722248  | 0.569 | 0.252 | 3.79E-14 | T cells, CD8+, naive, stimulated |
| <b>Ptp4a1</b>   | 3.82E-18 | 1.108329408  | 0.271 | 0.047 | 5.4E-14  | T cells, CD8+, naive, stimulated |
| <b>Actr3</b>    | 5.27E-18 | 0.572023538  | 0.698 | 0.356 | 7.46E-14 | T cells, CD8+, naive, stimulated |
| <b>Tgfr2</b>    | 6.28E-18 | 0.662496872  | 0.42  | 0.148 | 8.88E-14 | T cells, CD8+, naive, stimulated |
| <b>Gdi2</b>     | 8.84E-18 | 0.563579174  | 0.682 | 0.356 | 1.25E-13 | T cells, CD8+, naive, stimulated |
| <b>Rpl4</b>     | 1.05E-17 | 0.574174563  | 0.88  | 0.577 | 1.48E-13 | T cells, CD8+, naive, stimulated |
| <b>Sdcbp</b>    | 1.35E-17 | 0.863898313  | 0.379 | 0.121 | 1.91E-13 | T cells, CD8+, naive, stimulated |
| <b>Hnrnpab</b>  | 1.44E-17 | 0.723995626  | 0.554 | 0.255 | 2.03E-13 | T cells, CD8+, naive, stimulated |
| <b>Rpl13</b>    | 1.61E-17 | -0.350806064 | 0.999 | 0.906 | 2.28E-13 | T cells, CD8+, naive, stimulated |
| <b>Cd37</b>     | 1.83E-17 | -0.787769815 | 0.875 | 0.836 | 2.59E-13 | T cells, CD8+, naive, stimulated |
| <b>Rasgef1b</b> | 2.1E-17  | 0.981727915  | 0.368 | 0.111 | 2.97E-13 | T cells, CD8+, naive, stimulated |
| <b>Ppp1r15a</b> | 2.67E-17 | 0.644593644  | 0.616 | 0.315 | 3.78E-13 | T cells, CD8+, naive, stimulated |
| <b>Cd19</b>     | 2.98E-17 | 0.438266951  | 0.696 | 0.346 | 4.21E-13 | T cells, CD8+, naive, stimulated |
| <b>Hsp90aa1</b> | 4.08E-17 | 0.662960806  | 0.869 | 0.651 | 5.77E-13 | T cells, CD8+, naive, stimulated |
| <b>Rps2</b>     | 4.48E-17 | -0.461756413 | 0.999 | 0.919 | 6.34E-13 | T cells, CD8+, naive, stimulated |
| <b>Eif4a1</b>   | 8.72E-17 | 0.599441915  | 0.589 | 0.268 | 1.23E-12 | T cells, CD8+, naive, stimulated |

|                |          |              |       |       |          |                                  |
|----------------|----------|--------------|-------|-------|----------|----------------------------------|
| <b>Pim1</b>    | 1.05E-16 | 0.695307439  | 0.532 | 0.248 | 1.49E-12 | T cells, CD8+, naive, stimulated |
| <b>Gga2</b>    | 1.86E-16 | 0.827158479  | 0.318 | 0.081 | 2.64E-12 | T cells, CD8+, naive, stimulated |
| <b>Cd83</b>    | 1.88E-16 | 0.558958625  | 0.761 | 0.456 | 2.66E-12 | T cells, CD8+, naive, stimulated |
| <b>Dusp5</b>   | 2.38E-16 | 0.934984644  | 0.446 | 0.181 | 3.37E-12 | T cells, CD8+, naive, stimulated |
| <b>Scd1</b>    | 2.59E-16 | 0.608785091  | 0.499 | 0.221 | 3.66E-12 | T cells, CD8+, naive, stimulated |
| <b>Brd2</b>    | 3.84E-16 | 0.65983135   | 0.524 | 0.245 | 5.44E-12 | T cells, CD8+, naive, stimulated |
| <b>Rnf187</b>  | 5.65E-16 | 0.827979351  | 0.393 | 0.151 | 7.99E-12 | T cells, CD8+, naive, stimulated |
| <b>Cd79a</b>   | 1.06E-15 | -0.569102668 | 0.994 | 0.899 | 1.5E-11  | T cells, CD8+, naive, stimulated |
| <b>Sell</b>    | 1.36E-15 | 0.319709663  | 0.585 | 0.285 | 1.92E-11 | T cells, CD8+, naive, stimulated |
| <b>Lamp1</b>   | 1.36E-15 | 0.654108639  | 0.389 | 0.141 | 1.92E-11 | T cells, CD8+, naive, stimulated |
| <b>Cd24a</b>   | 2.31E-15 | 0.631493938  | 0.631 | 0.336 | 3.27E-11 | T cells, CD8+, naive, stimulated |
| <b>Lyn</b>     | 3.81E-15 | 0.517402452  | 0.606 | 0.309 | 5.39E-11 | T cells, CD8+, naive, stimulated |
| <b>Sf1</b>     | 4.96E-15 | 0.527520391  | 0.537 | 0.255 | 7.02E-11 | T cells, CD8+, naive, stimulated |
| <b>Cd53</b>    | 7.29E-15 | 0.448159566  | 0.607 | 0.309 | 1.03E-10 | T cells, CD8+, naive, stimulated |
| <b>Fam43a</b>  | 8.39E-15 | 0.773793659  | 0.404 | 0.158 | 1.19E-10 | T cells, CD8+, naive, stimulated |
| <b>Capza1</b>  | 9.91E-15 | 0.719126823  | 0.372 | 0.141 | 1.4E-10  | T cells, CD8+, naive, stimulated |
| <b>Cebpb</b>   | 1.03E-14 | 0.841453298  | 0.504 | 0.245 | 1.45E-10 | T cells, CD8+, naive, stimulated |
| <b>Fam49b</b>  | 1.17E-14 | 0.644335443  | 0.456 | 0.208 | 1.66E-10 | T cells, CD8+, naive, stimulated |
| <b>Slbp</b>    | 1.39E-14 | 0.76068523   | 0.384 | 0.151 | 1.97E-10 | T cells, CD8+, naive, stimulated |
| <b>Rpl10</b>   | 1.75E-14 | 0.513557977  | 0.81  | 0.497 | 2.48E-10 | T cells, CD8+, naive, stimulated |
| <b>Polr2a</b>  | 2.06E-14 | 0.501763611  | 0.478 | 0.218 | 2.92E-10 | T cells, CD8+, naive, stimulated |
| <b>Tmed2</b>   | 3.53E-14 | 0.574339455  | 0.476 | 0.218 | 5E-10    | T cells, CD8+, naive, stimulated |
| <b>Cd9</b>     | 3.58E-14 | -0.574629202 | 0.023 | 0.117 | 5.07E-10 | T cells, CD8+, naive, stimulated |
| <b>Tob1</b>    | 5.17E-14 | 0.661951743  | 0.308 | 0.101 | 7.32E-10 | T cells, CD8+, naive, stimulated |
| <b>Rps4x</b>   | 5.56E-14 | -0.330113173 | 0.999 | 0.872 | 7.86E-10 | T cells, CD8+, naive, stimulated |
| <b>Srsf3</b>   | 6.23E-14 | 0.521757367  | 0.62  | 0.342 | 8.82E-10 | T cells, CD8+, naive, stimulated |
| <b>Sh3bp5</b>  | 7.01E-14 | 0.679634436  | 0.391 | 0.154 | 9.92E-10 | T cells, CD8+, naive, stimulated |
| <b>Foxo1</b>   | 7.82E-14 | 0.62973309   | 0.404 | 0.164 | 1.11E-09 | T cells, CD8+, naive, stimulated |
| <b>Cd79b</b>   | 8.09E-14 | -0.863418989 | 0.852 | 0.802 | 1.14E-09 | T cells, CD8+, naive, stimulated |
| <b>Mcl1</b>    | 8.23E-14 | 0.651743366  | 0.52  | 0.262 | 1.17E-09 | T cells, CD8+, naive, stimulated |
| <b>Oser1</b>   | 9.88E-14 | 0.774644583  | 0.328 | 0.121 | 1.4E-09  | T cells, CD8+, naive, stimulated |
| <b>Pmaip1</b>  | 1.01E-13 | 0.959174691  | 0.282 | 0.081 | 1.42E-09 | T cells, CD8+, naive, stimulated |
| <b>Tsc22d1</b> | 1.37E-13 | 1.061566049  | 0.308 | 0.091 | 1.93E-09 | T cells, CD8+, naive, stimulated |
| <b>Arhgef1</b> | 1.63E-13 | 0.417463512  | 0.599 | 0.319 | 2.31E-09 | T cells, CD8+, naive, stimulated |
| <b>Khdrbs1</b> | 1.69E-13 | 0.5730999    | 0.344 | 0.124 | 2.4E-09  | T cells, CD8+, naive, stimulated |

|                |          |              |       |       |          |                                  |
|----------------|----------|--------------|-------|-------|----------|----------------------------------|
| <b>H2-D1</b>   | 2.2E-13  | 0.290553598  | 0.98  | 0.862 | 3.12E-09 | T cells, CD8+, naive, stimulated |
| <b>Zfp36l1</b> | 2.37E-13 | 0.40070132   | 0.852 | 0.597 | 3.35E-09 | T cells, CD8+, naive, stimulated |
| <b>Gapdh</b>   | 2.89E-13 | -0.728901109 | 0.886 | 0.792 | 4.09E-09 | T cells, CD8+, naive, stimulated |
| <b>Crlf3</b>   | 4.68E-13 | 0.413262067  | 0.43  | 0.191 | 6.62E-09 | T cells, CD8+, naive, stimulated |
| <b>Tomm6</b>   | 4.95E-13 | -0.914454502 | 0.185 | 0.356 | 7E-09    | T cells, CD8+, naive, stimulated |
| <b>Cd55</b>    | 5.56E-13 | 0.292379587  | 0.696 | 0.376 | 7.87E-09 | T cells, CD8+, naive, stimulated |
| <b>Rpl39</b>   | 6.47E-13 | 0.347117654  | 0.997 | 0.839 | 9.16E-09 | T cells, CD8+, naive, stimulated |
| <b>Herpud1</b> | 6.89E-13 | 0.815063651  | 0.34  | 0.134 | 9.75E-09 | T cells, CD8+, naive, stimulated |
| <b>Rpl10a</b>  | 7.47E-13 | -0.437081211 | 0.985 | 0.859 | 1.06E-08 | T cells, CD8+, naive, stimulated |
| <b>Rbm3</b>    | 7.9E-13  | 0.482831677  | 0.845 | 0.55  | 1.12E-08 | T cells, CD8+, naive, stimulated |
| <b>Clic1</b>   | 8.2E-13  | -0.902840778 | 0.57  | 0.631 | 1.16E-08 | T cells, CD8+, naive, stimulated |
| <b>Sfpq</b>    | 8.63E-13 | 0.467768748  | 0.457 | 0.218 | 1.22E-08 | T cells, CD8+, naive, stimulated |
| <b>Rpl11</b>   | 9.08E-13 | -0.337585552 | 0.993 | 0.886 | 1.29E-08 | T cells, CD8+, naive, stimulated |
| <b>Eif4a2</b>  | 1.16E-12 | 0.506604168  | 0.508 | 0.255 | 1.65E-08 | T cells, CD8+, naive, stimulated |
| <b>Myh9</b>    | 1.22E-12 | 0.473541475  | 0.58  | 0.315 | 1.73E-08 | T cells, CD8+, naive, stimulated |
| <b>Jun</b>     | 1.29E-12 | 0.470405018  | 0.545 | 0.295 | 1.83E-08 | T cells, CD8+, naive, stimulated |
| <b>Cyth1</b>   | 2.25E-12 | 0.402089897  | 0.432 | 0.198 | 3.18E-08 | T cells, CD8+, naive, stimulated |
| <b>Wipf1</b>   | 2.3E-12  | 0.635855539  | 0.241 | 0.057 | 3.25E-08 | T cells, CD8+, naive, stimulated |
| <b>Cbx4</b>    | 2.38E-12 | 0.695097896  | 0.244 | 0.06  | 3.38E-08 | T cells, CD8+, naive, stimulated |
| <b>Srsf2</b>   | 2.49E-12 | 0.498626387  | 0.541 | 0.292 | 3.53E-08 | T cells, CD8+, naive, stimulated |
| <b>Cxcr5</b>   | 2.53E-12 | 0.554062895  | 0.393 | 0.178 | 3.59E-08 | T cells, CD8+, naive, stimulated |
| <b>Rnf145</b>  | 2.71E-12 | 0.648261416  | 0.26  | 0.074 | 3.83E-08 | T cells, CD8+, naive, stimulated |
| <b>Taf6l</b>   | 2.8E-12  | 0.693197407  | 0.272 | 0.087 | 3.96E-08 | T cells, CD8+, naive, stimulated |
| <b>Mrfap1</b>  | 2.99E-12 | 0.610792524  | 0.403 | 0.195 | 4.23E-08 | T cells, CD8+, naive, stimulated |
| <b>Pou2af1</b> | 3.18E-12 | 0.511661372  | 0.386 | 0.161 | 4.5E-08  | T cells, CD8+, naive, stimulated |
| <b>Rps13</b>   | 3.2E-12  | 0.332038789  | 0.999 | 0.856 | 4.52E-08 | T cells, CD8+, naive, stimulated |
| <b>Snx9</b>    | 3.39E-12 | 0.613454328  | 0.395 | 0.178 | 4.8E-08  | T cells, CD8+, naive, stimulated |
| <b>Prkcb</b>   | 3.53E-12 | 0.421078092  | 0.502 | 0.252 | 5E-08    | T cells, CD8+, naive, stimulated |
| <b>Amd1</b>    | 3.99E-12 | 0.744311122  | 0.249 | 0.07  | 5.64E-08 | T cells, CD8+, naive, stimulated |
| <b>Rpl18</b>   | 4.12E-12 | -0.389882335 | 0.996 | 0.876 | 5.83E-08 | T cells, CD8+, naive, stimulated |
| <b>Cpm</b>     | 4.13E-12 | 0.546737819  | 0.297 | 0.094 | 5.85E-08 | T cells, CD8+, naive, stimulated |
| <b>Tpm4</b>    | 4.14E-12 | 0.501201033  | 0.408 | 0.195 | 5.86E-08 | T cells, CD8+, naive, stimulated |
| <b>Rps8</b>    | 4.94E-12 | -0.273002104 | 0.999 | 0.916 | 7E-08    | T cells, CD8+, naive, stimulated |
| <b>Ppp1cc</b>  | 5.9E-12  | 0.424004863  | 0.412 | 0.191 | 8.35E-08 | T cells, CD8+, naive, stimulated |
| <b>Cacybp</b>  | 5.91E-12 | 0.595492868  | 0.414 | 0.191 | 8.36E-08 | T cells, CD8+, naive, stimulated |

|                  |          |              |       |       |          |                                  |
|------------------|----------|--------------|-------|-------|----------|----------------------------------|
| <b>Pxk</b>       | 6.12E-12 | 0.343461564  | 0.373 | 0.154 | 8.66E-08 | T cells, CD8+, naive, stimulated |
| <b>Eif2ak3</b>   | 7.26E-12 | 0.459552484  | 0.322 | 0.114 | 1.03E-07 | T cells, CD8+, naive, stimulated |
| <b>Eif4g2</b>    | 8.06E-12 | 0.278302243  | 0.617 | 0.342 | 1.14E-07 | T cells, CD8+, naive, stimulated |
| <b>Rps3a1</b>    | 8.09E-12 | -0.285306357 | 0.999 | 0.909 | 1.15E-07 | T cells, CD8+, naive, stimulated |
| <b>Dnajb6</b>    | 9.06E-12 | 0.658363939  | 0.367 | 0.158 | 1.28E-07 | T cells, CD8+, naive, stimulated |
| <b>Ncf2</b>      | 9.59E-12 | 0.578538823  | 0.334 | 0.134 | 1.36E-07 | T cells, CD8+, naive, stimulated |
| <b>Tmem123</b>   | 9.81E-12 | 0.518664754  | 0.463 | 0.221 | 1.39E-07 | T cells, CD8+, naive, stimulated |
| <b>Cnn2</b>      | 1.22E-11 | 0.572410398  | 0.483 | 0.252 | 1.73E-07 | T cells, CD8+, naive, stimulated |
| <b>Wsb1</b>      | 1.25E-11 | 0.504289736  | 0.325 | 0.128 | 1.77E-07 | T cells, CD8+, naive, stimulated |
| <b>Gpr171</b>    | 1.32E-11 | 0.533621903  | 0.385 | 0.168 | 1.86E-07 | T cells, CD8+, naive, stimulated |
| <b>Hist1h2ap</b> | 1.32E-11 | 0.762240619  | 0.327 | 0.131 | 1.86E-07 | T cells, CD8+, naive, stimulated |
| <b>Fmnl1</b>     | 1.57E-11 | 0.494838721  | 0.381 | 0.171 | 2.22E-07 | T cells, CD8+, naive, stimulated |
| <b>Eif3e</b>     | 1.67E-11 | 0.433644692  | 0.476 | 0.238 | 2.36E-07 | T cells, CD8+, naive, stimulated |
| <b>Stk24</b>     | 1.86E-11 | 0.361673609  | 0.495 | 0.252 | 2.64E-07 | T cells, CD8+, naive, stimulated |
| <b>Tubb4b</b>    | 1.92E-11 | 0.376459737  | 0.576 | 0.312 | 2.71E-07 | T cells, CD8+, naive, stimulated |
| <b>Cd22</b>      | 1.93E-11 | 0.552839337  | 0.333 | 0.131 | 2.73E-07 | T cells, CD8+, naive, stimulated |
| <b>Rps11</b>     | 2.34E-11 | -0.371005409 | 0.996 | 0.872 | 3.31E-07 | T cells, CD8+, naive, stimulated |
| <b>Adipor1</b>   | 2.45E-11 | 0.472819138  | 0.34  | 0.141 | 3.47E-07 | T cells, CD8+, naive, stimulated |
| <b>Tuba1a</b>    | 2.56E-11 | 0.598578552  | 0.576 | 0.339 | 3.63E-07 | T cells, CD8+, naive, stimulated |
| <b>Atf4</b>      | 2.8E-11  | 0.387070447  | 0.488 | 0.255 | 3.97E-07 | T cells, CD8+, naive, stimulated |
| <b>Trp53i11</b>  | 2.85E-11 | 0.570432588  | 0.355 | 0.148 | 4.04E-07 | T cells, CD8+, naive, stimulated |
| <b>Mknk2</b>     | 2.96E-11 | 0.59884253   | 0.31  | 0.124 | 4.19E-07 | T cells, CD8+, naive, stimulated |
| <b>Rpl21</b>     | 3.01E-11 | 0.332809153  | 1     | 0.839 | 4.26E-07 | T cells, CD8+, naive, stimulated |
| <b>Nrros</b>     | 3.17E-11 | 0.606089352  | 0.383 | 0.181 | 4.48E-07 | T cells, CD8+, naive, stimulated |
| <b>Nrbp1</b>     | 3.23E-11 | 0.571171599  | 0.32  | 0.134 | 4.58E-07 | T cells, CD8+, naive, stimulated |
| <b>Lbr</b>       | 3.9E-11  | 0.399256048  | 0.307 | 0.114 | 5.52E-07 | T cells, CD8+, naive, stimulated |
| <b>Ywhaq</b>     | 4.38E-11 | 0.442870791  | 0.402 | 0.188 | 6.2E-07  | T cells, CD8+, naive, stimulated |
| <b>Peli1</b>     | 4.64E-11 | 0.306792723  | 0.346 | 0.144 | 6.57E-07 | T cells, CD8+, naive, stimulated |
| <b>Man1a</b>     | 4.64E-11 | 0.419782679  | 0.371 | 0.178 | 6.57E-07 | T cells, CD8+, naive, stimulated |
| <b>Hnrnpl</b>    | 4.77E-11 | 0.460521565  | 0.475 | 0.248 | 6.75E-07 | T cells, CD8+, naive, stimulated |
| <b>Uald2</b>     | 5.19E-11 | 0.792723017  | 0.343 | 0.158 | 7.35E-07 | T cells, CD8+, naive, stimulated |
| <b>Akap13</b>    | 5.61E-11 | 0.288020073  | 0.564 | 0.315 | 7.94E-07 | T cells, CD8+, naive, stimulated |
| <b>Tagap</b>     | 5.61E-11 | 0.738672901  | 0.252 | 0.084 | 7.94E-07 | T cells, CD8+, naive, stimulated |
| <b>Rps5</b>      | 5.64E-11 | -0.325868938 | 0.998 | 0.883 | 7.98E-07 | T cells, CD8+, naive, stimulated |
| <b>Rnf167</b>    | 5.76E-11 | 0.629784381  | 0.284 | 0.104 | 8.16E-07 | T cells, CD8+, naive, stimulated |

|                 |          |              |       |       |          |                                  |
|-----------------|----------|--------------|-------|-------|----------|----------------------------------|
| <b>S1pr1</b>    | 5.82E-11 | 0.415028546  | 0.532 | 0.289 | 8.24E-07 | T cells, CD8+, naive, stimulated |
| <b>B4galnt1</b> | 6.66E-11 | 0.468353851  | 0.415 | 0.201 | 9.43E-07 | T cells, CD8+, naive, stimulated |
| <b>Unc93b1</b>  | 6.86E-11 | 0.391729737  | 0.643 | 0.383 | 9.71E-07 | T cells, CD8+, naive, stimulated |
| <b>Ap2m1</b>    | 7.18E-11 | 0.596832914  | 0.33  | 0.144 | 1.02E-06 | T cells, CD8+, naive, stimulated |
| <b>Calr</b>     | 7.57E-11 | 0.430096539  | 0.417 | 0.198 | 1.07E-06 | T cells, CD8+, naive, stimulated |
| <b>Prrc2a</b>   | 8.01E-11 | 0.469299474  | 0.309 | 0.121 | 1.13E-06 | T cells, CD8+, naive, stimulated |
| <b>Lmo2</b>     | 8.15E-11 | 0.557986527  | 0.215 | 0.054 | 1.15E-06 | T cells, CD8+, naive, stimulated |
| <b>AW112010</b> | 8.64E-11 | -1.046311547 | 0.077 | 0.191 | 1.22E-06 | T cells, CD8+, naive, stimulated |
| <b>Dnaja1</b>   | 8.74E-11 | 0.445364017  | 0.778 | 0.55  | 1.24E-06 | T cells, CD8+, naive, stimulated |
| <b>Ctbp1</b>    | 9.06E-11 | 0.614500145  | 0.312 | 0.134 | 1.28E-06 | T cells, CD8+, naive, stimulated |
| <b>Mef2d</b>    | 1.02E-10 | 0.462688781  | 0.312 | 0.134 | 1.44E-06 | T cells, CD8+, naive, stimulated |
| <b>Tnfaip3</b>  | 1.03E-10 | 0.711926072  | 0.33  | 0.144 | 1.45E-06 | T cells, CD8+, naive, stimulated |
| <b>Hnrnpa2b</b> | 1.14E-10 | 0.259820301  | 0.77  | 0.477 | 1.62E-06 | T cells, CD8+, naive, stimulated |
| <b>Fosb</b>     | 1.22E-10 | 0.47611797   | 0.415 | 0.208 | 1.73E-06 | T cells, CD8+, naive, stimulated |
| <b>Cd164</b>    | 1.24E-10 | 0.5661303    | 0.304 | 0.124 | 1.76E-06 | T cells, CD8+, naive, stimulated |
| <b>Mfap1b</b>   | 1.75E-10 | 0.575278889  | 0.258 | 0.084 | 2.48E-06 | T cells, CD8+, naive, stimulated |
| <b>Tprgl</b>    | 1.78E-10 | 0.6490128    | 0.287 | 0.114 | 2.52E-06 | T cells, CD8+, naive, stimulated |
| <b>Ly6a</b>     | 1.86E-10 | -1.23200544  | 0.333 | 0.446 | 2.63E-06 | T cells, CD8+, naive, stimulated |
| <b>Cd74</b>     | 1.91E-10 | -0.343834305 | 1     | 0.993 | 2.71E-06 | T cells, CD8+, naive, stimulated |
| <b>Bcl10</b>    | 1.91E-10 | 0.498436756  | 0.381 | 0.185 | 2.71E-06 | T cells, CD8+, naive, stimulated |
| <b>Kctd12</b>   | 2.32E-10 | 0.389011889  | 0.306 | 0.121 | 3.28E-06 | T cells, CD8+, naive, stimulated |
| <b>Hnrnp2</b>   | 2.43E-10 | 0.466440803  | 0.295 | 0.114 | 3.44E-06 | T cells, CD8+, naive, stimulated |
| <b>Morf4l2</b>  | 2.5E-10  | 0.58534065   | 0.239 | 0.077 | 3.54E-06 | T cells, CD8+, naive, stimulated |
| <b>Rps9</b>     | 2.77E-10 | -0.317939116 | 0.987 | 0.866 | 3.92E-06 | T cells, CD8+, naive, stimulated |
| <b>Traf4</b>    | 2.95E-10 | 0.630808292  | 0.267 | 0.097 | 4.18E-06 | T cells, CD8+, naive, stimulated |
| <b>Irf4</b>     | 3.21E-10 | 0.410249212  | 0.338 | 0.141 | 4.54E-06 | T cells, CD8+, naive, stimulated |
| <b>Azin1</b>    | 3.44E-10 | 0.555452896  | 0.246 | 0.081 | 4.86E-06 | T cells, CD8+, naive, stimulated |
| <b>Cat</b>      | 3.49E-10 | 0.582207688  | 0.23  | 0.07  | 4.94E-06 | T cells, CD8+, naive, stimulated |
| <b>Ier2</b>     | 3.83E-10 | 0.391614031  | 0.837 | 0.607 | 5.42E-06 | T cells, CD8+, naive, stimulated |
| <b>Hvcn1</b>    | 4.21E-10 | 0.43137983   | 0.382 | 0.178 | 5.95E-06 | T cells, CD8+, naive, stimulated |
| <b>Rpl37a</b>   | 4.38E-10 | 0.297694941  | 0.995 | 0.899 | 6.2E-06  | T cells, CD8+, naive, stimulated |
| <b>Eif4b</b>    | 4.94E-10 | 0.493289439  | 0.323 | 0.138 | 6.99E-06 | T cells, CD8+, naive, stimulated |
| <b>Polr2m</b>   | 5.12E-10 | 0.436018838  | 0.24  | 0.074 | 7.25E-06 | T cells, CD8+, naive, stimulated |
| <b>Stip1</b>    | 5.15E-10 | 0.375949326  | 0.325 | 0.138 | 7.29E-06 | T cells, CD8+, naive, stimulated |
| <b>Map2k1</b>   | 6.33E-10 | 0.54971503   | 0.253 | 0.091 | 8.97E-06 | T cells, CD8+, naive, stimulated |

|                 |          |              |       |       |          |                                  |
|-----------------|----------|--------------|-------|-------|----------|----------------------------------|
| <b>Ptbp3</b>    | 6.62E-10 | 0.381121184  | 0.51  | 0.292 | 9.37E-06 | T cells, CD8+, naive, stimulated |
| <b>Per1</b>     | 6.91E-10 | 0.530117601  | 0.338 | 0.154 | 9.78E-06 | T cells, CD8+, naive, stimulated |
| <b>Ubl3</b>     | 7.08E-10 | 0.468335566  | 0.379 | 0.188 | 1E-05    | T cells, CD8+, naive, stimulated |
| <b>Fkbp4</b>    | 7.43E-10 | 0.511724096  | 0.306 | 0.128 | 1.05E-05 | T cells, CD8+, naive, stimulated |
| <b>Rbm7</b>     | 7.56E-10 | 0.598173275  | 0.231 | 0.077 | 1.07E-05 | T cells, CD8+, naive, stimulated |
| <b>Siah2</b>    | 7.87E-10 | 0.605085981  | 0.234 | 0.081 | 1.11E-05 | T cells, CD8+, naive, stimulated |
| <b>Tob2</b>     | 7.89E-10 | 0.48897395   | 0.387 | 0.191 | 1.12E-05 | T cells, CD8+, naive, stimulated |
| <b>Abhd17b</b>  | 7.95E-10 | 0.380477556  | 0.403 | 0.205 | 1.13E-05 | T cells, CD8+, naive, stimulated |
| <b>Ptk2b</b>    | 9.46E-10 | 0.366628538  | 0.317 | 0.138 | 1.34E-05 | T cells, CD8+, naive, stimulated |
| <b>Cyba</b>     | 1.01E-09 | -0.77945067  | 0.765 | 0.715 | 1.43E-05 | T cells, CD8+, naive, stimulated |
| <b>Ubqln1</b>   | 1.02E-09 | 0.476335097  | 0.251 | 0.087 | 1.44E-05 | T cells, CD8+, naive, stimulated |
| <b>Epn1</b>     | 1.2E-09  | 0.626768031  | 0.303 | 0.141 | 1.7E-05  | T cells, CD8+, naive, stimulated |
| <b>Ass1</b>     | 1.24E-09 | -0.376159339 | 0.035 | 0.121 | 1.76E-05 | T cells, CD8+, naive, stimulated |
| <b>Srgn</b>     | 1.34E-09 | -0.601046478 | 0.946 | 0.869 | 1.89E-05 | T cells, CD8+, naive, stimulated |
| <b>Gem</b>      | 1.43E-09 | 0.31985275   | 0.404 | 0.205 | 2.03E-05 | T cells, CD8+, naive, stimulated |
| <b>H2-T23</b>   | 1.46E-09 | 0.250445395  | 0.524 | 0.285 | 2.07E-05 | T cells, CD8+, naive, stimulated |
| <b>Atp5b</b>    | 1.59E-09 | 0.292639782  | 0.529 | 0.302 | 2.25E-05 | T cells, CD8+, naive, stimulated |
| <b>Elmsan1</b>  | 1.62E-09 | 0.456353099  | 0.323 | 0.148 | 2.29E-05 | T cells, CD8+, naive, stimulated |
| <b>Usp38</b>    | 1.62E-09 | 0.55071527   | 0.183 | 0.044 | 2.3E-05  | T cells, CD8+, naive, stimulated |
| <b>Ctnnb1</b>   | 1.64E-09 | 0.297221985  | 0.287 | 0.114 | 2.33E-05 | T cells, CD8+, naive, stimulated |
| <b>Gm26532</b>  | 1.73E-09 | 0.337725329  | 0.33  | 0.144 | 2.45E-05 | T cells, CD8+, naive, stimulated |
| <b>Ppp4c</b>    | 2.01E-09 | 0.437714771  | 0.41  | 0.218 | 2.84E-05 | T cells, CD8+, naive, stimulated |
| <b>Gm42418</b>  | 2.04E-09 | -0.325287963 | 0.998 | 1     | 2.89E-05 | T cells, CD8+, naive, stimulated |
| <b>Gpi1</b>     | 2.12E-09 | 0.375175857  | 0.434 | 0.228 | 3E-05    | T cells, CD8+, naive, stimulated |
| <b>AI467606</b> | 2.17E-09 | 0.616237907  | 0.222 | 0.07  | 3.08E-05 | T cells, CD8+, naive, stimulated |
| <b>Prkcd</b>    | 2.33E-09 | 0.520117961  | 0.287 | 0.121 | 3.29E-05 | T cells, CD8+, naive, stimulated |
| <b>Wbp2</b>     | 2.6E-09  | 0.528468412  | 0.358 | 0.181 | 3.68E-05 | T cells, CD8+, naive, stimulated |
| <b>Neur13</b>   | 2.69E-09 | 0.293039529  | 0.292 | 0.111 | 3.81E-05 | T cells, CD8+, naive, stimulated |
| <b>Oat</b>      | 2.74E-09 | 0.361734875  | 0.254 | 0.094 | 3.87E-05 | T cells, CD8+, naive, stimulated |
| <b>Ly6e</b>     | 2.79E-09 | -0.480392534 | 0.99  | 0.936 | 3.95E-05 | T cells, CD8+, naive, stimulated |
| <b>Arhgdia</b>  | 2.84E-09 | 0.349593319  | 0.53  | 0.322 | 4.03E-05 | T cells, CD8+, naive, stimulated |
| <b>Adrb2</b>    | 2.87E-09 | 0.488200094  | 0.261 | 0.101 | 4.07E-05 | T cells, CD8+, naive, stimulated |
| <b>Ago2</b>     | 2.9E-09  | 0.427959906  | 0.242 | 0.084 | 4.1E-05  | T cells, CD8+, naive, stimulated |
| <b>Hmgb1</b>    | 3.15E-09 | 0.338328787  | 0.717 | 0.453 | 4.46E-05 | T cells, CD8+, naive, stimulated |
| <b>Itsn2</b>    | 3.18E-09 | 0.485092886  | 0.29  | 0.124 | 4.5E-05  | T cells, CD8+, naive, stimulated |



|                |          |              |       |       |            |                                  |
|----------------|----------|--------------|-------|-------|------------|----------------------------------|
| <b>Blk</b>     | 3.25E-09 | 0.335153484  | 0.532 | 0.299 | 4.6E-05    | T cells, CD8+, naive, stimulated |
| <b>Ost4</b>    | 4.11E-09 | 0.384863118  | 0.552 | 0.336 | 5.81E-05   | T cells, CD8+, naive, stimulated |
| <b>Tspan13</b> | 4.14E-09 | 0.379135953  | 0.469 | 0.272 | 5.86E-05   | T cells, CD8+, naive, stimulated |
| <b>Rpl8</b>    | 4.36E-09 | -0.271374779 | 0.996 | 0.889 | 6.17E-05   | T cells, CD8+, naive, stimulated |
| <b>Tram1</b>   | 4.37E-09 | 0.382767603  | 0.264 | 0.104 | 6.18E-05   | T cells, CD8+, naive, stimulated |
| <b>Ccm2</b>    | 4.46E-09 | 0.478704804  | 0.291 | 0.124 | 6.31E-05   | T cells, CD8+, naive, stimulated |
| <b>Blnk</b>    | 4.49E-09 | 0.3338876    | 0.493 | 0.285 | 6.35E-05   | T cells, CD8+, naive, stimulated |
| <b>Ppp3ca</b>  | 4.52E-09 | 0.358402131  | 0.466 | 0.252 | 6.4E-05    | T cells, CD8+, naive, stimulated |
| <b>Csrnp1</b>  | 4.55E-09 | 0.57709226   | 0.274 | 0.114 | 6.44E-05   | T cells, CD8+, naive, stimulated |
| <b>Arid5a</b>  | 4.57E-09 | 0.4155453    | 0.361 | 0.181 | 6.47E-05   | T cells, CD8+, naive, stimulated |
| <b>Il16</b>    | 4.79E-09 | 0.455104465  | 0.218 | 0.07  | 6.78E-05   | T cells, CD8+, naive, stimulated |
| <b>Sesn3</b>   | 5.55E-09 | 0.383772185  | 0.218 | 0.067 | 7.86E-05   | T cells, CD8+, naive, stimulated |
| <b>Ube2d2a</b> | 5.85E-09 | 0.306036732  | 0.524 | 0.319 | 8.28E-05   | T cells, CD8+, naive, stimulated |
| <b>Tpm3</b>    | 6.18E-09 | 0.266947032  | 0.547 | 0.322 | 8.75E-05   | T cells, CD8+, naive, stimulated |
| <b>Cap1</b>    | 6.32E-09 | 0.41131443   | 0.279 | 0.114 | 8.95E-05   | T cells, CD8+, naive, stimulated |
| <b>Marcks1</b> | 6.64E-09 | 0.690389346  | 0.332 | 0.158 | 9.4E-05    | T cells, CD8+, naive, stimulated |
| <b>Vapa</b>    | 6.69E-09 | 0.461983871  | 0.35  | 0.178 | 9.47E-05   | T cells, CD8+, naive, stimulated |
| <b>Spop</b>    | 7.46E-09 | 0.622843425  | 0.26  | 0.111 | 0.00010567 | T cells, CD8+, naive, stimulated |
| <b>Ehd1</b>    | 8.88E-09 | 0.533302835  | 0.268 | 0.111 | 0.00012574 | T cells, CD8+, naive, stimulated |
| <b>Cdc42</b>   | 8.99E-09 | 0.320487999  | 0.733 | 0.47  | 0.00012729 | T cells, CD8+, naive, stimulated |
| <b>Hspe1</b>   | 9.13E-09 | 0.521579428  | 0.818 | 0.624 | 0.00012928 | T cells, CD8+, naive, stimulated |
| <b>Fli1</b>    | 9.57E-09 | 0.3470382    | 0.353 | 0.168 | 0.00013549 | T cells, CD8+, naive, stimulated |
| <b>Rsrp1</b>   | 1.02E-08 | 0.291177958  | 0.403 | 0.208 | 0.00014407 | T cells, CD8+, naive, stimulated |
| <b>Capza2</b>  | 1.04E-08 | 0.456408275  | 0.344 | 0.178 | 0.00014666 | T cells, CD8+, naive, stimulated |
| <b>Ewsr1</b>   | 1.07E-08 | 0.452040499  | 0.333 | 0.164 | 0.00015109 | T cells, CD8+, naive, stimulated |
| <b>Ywhah</b>   | 1.09E-08 | 0.490430187  | 0.454 | 0.265 | 0.00015418 | T cells, CD8+, naive, stimulated |
| <b>Actb</b>    | 1.21E-08 | -0.383627748 | 0.999 | 0.956 | 0.00017069 | T cells, CD8+, naive, stimulated |
| <b>Zfp318</b>  | 1.24E-08 | 0.250627586  | 0.252 | 0.087 | 0.00017530 | T cells, CD8+, naive, stimulated |
| <b>Chtf8</b>   | 1.26E-08 | 0.586573124  | 0.179 | 0.05  | 0.00017828 | T cells, CD8+, naive, stimulated |
| <b>Rpl29</b>   | 1.44E-08 | -0.385194346 | 0.979 | 0.842 | 0.00020360 | T cells, CD8+, naive, stimulated |
| <b>Set</b>     | 1.5E-08  | 0.378716475  | 0.372 | 0.205 | 0.00021284 | T cells, CD8+, naive, stimulated |
| <b>Ptges3</b>  | 1.53E-08 | 0.526726475  | 0.367 | 0.195 | 0.00021729 | T cells, CD8+, naive, stimulated |
| <b>Cnp</b>     | 1.56E-08 | 0.45752595   | 0.39  | 0.208 | 0.00022077 | T cells, CD8+, naive, stimulated |
| <b>Vars</b>    | 1.56E-08 | 0.296848068  | 0.352 | 0.181 | 0.00022137 | T cells, CD8+, naive, stimulated |
| <b>Sipa1</b>   | 1.71E-08 | 0.324743392  | 0.302 | 0.134 | 0.00024139 | T cells, CD8+, naive, stimulated |

|                  |          |             |       |       |            |                                  |
|------------------|----------|-------------|-------|-------|------------|----------------------------------|
| <b>Snx2</b>      | 1.72E-08 | 0.304281455 | 0.545 | 0.322 | 0.00024302 | T cells, CD8+, naive, stimulated |
| <b>Bri3</b>      | 1.74E-08 | 0.437926613 | 0.593 | 0.389 | 0.00024627 | T cells, CD8+, naive, stimulated |
| <b>Tiparp</b>    | 1.81E-08 | 0.512873265 | 0.263 | 0.111 | 0.00025586 | T cells, CD8+, naive, stimulated |
| <b>Atp6v0d1</b>  | 1.89E-08 | 0.503897459 | 0.363 | 0.191 | 0.00026717 | T cells, CD8+, naive, stimulated |
| <b>Irs2</b>      | 2.29E-08 | 0.307688979 | 0.288 | 0.128 | 0.00032392 | T cells, CD8+, naive, stimulated |
| <b>Lpgat1</b>    | 2.3E-08  | 0.504936292 | 0.201 | 0.067 | 0.00032606 | T cells, CD8+, naive, stimulated |
| <b>Plekham1</b>  | 2.35E-08 | 0.446013788 | 0.185 | 0.054 | 0.00033197 | T cells, CD8+, naive, stimulated |
| <b>Hnrnpdl</b>   | 2.45E-08 | 0.325536046 | 0.451 | 0.258 | 0.00034678 | T cells, CD8+, naive, stimulated |
| <b>Mta2</b>      | 2.46E-08 | 0.588650257 | 0.202 | 0.07  | 0.00034795 | T cells, CD8+, naive, stimulated |
| <b>Wdr1</b>      | 2.46E-08 | 0.505119497 | 0.275 | 0.124 | 0.00034886 | T cells, CD8+, naive, stimulated |
| <b>Arpc5</b>     | 2.65E-08 | 0.332296981 | 0.536 | 0.315 | 0.00037564 | T cells, CD8+, naive, stimulated |
| <b>Tnfrsf13c</b> | 2.75E-08 | 0.519277302 | 0.29  | 0.128 | 0.00038927 | T cells, CD8+, naive, stimulated |
| <b>Cirbp</b>     | 2.78E-08 | 0.361481153 | 0.507 | 0.299 | 0.00039335 | T cells, CD8+, naive, stimulated |
| <b>Ptp4a2</b>    | 2.83E-08 | 0.329213964 | 0.391 | 0.205 | 0.00040064 | T cells, CD8+, naive, stimulated |
| <b>Rab11b</b>    | 2.87E-08 | 0.396032209 | 0.381 | 0.208 | 0.00040688 | T cells, CD8+, naive, stimulated |
| <b>St6gal1</b>   | 3.04E-08 | 0.307541478 | 0.308 | 0.141 | 0.00043067 | T cells, CD8+, naive, stimulated |
| <b>Trp53inp2</b> | 3.13E-08 | 0.495477494 | 0.228 | 0.087 | 0.00044368 | T cells, CD8+, naive, stimulated |
| <b>Atp6ap1</b>   | 3.85E-08 | 0.493721021 | 0.274 | 0.124 | 0.00054478 | T cells, CD8+, naive, stimulated |
| <b>Parp1</b>     | 4.3E-08  | 0.442159471 | 0.311 | 0.151 | 0.00060864 | T cells, CD8+, naive, stimulated |
| <b>Csde1</b>     | 4.51E-08 | 0.410139159 | 0.283 | 0.138 | 0.00063894 | T cells, CD8+, naive, stimulated |
| <b>Hnrnpa3</b>   | 4.76E-08 | 0.263786765 | 0.581 | 0.366 | 0.00067377 | T cells, CD8+, naive, stimulated |
| <b>Ssrp1</b>     | 4.97E-08 | 0.470164269 | 0.219 | 0.081 | 0.00070345 | T cells, CD8+, naive, stimulated |
| <b>Esyt1</b>     | 5.14E-08 | 0.308033102 | 0.246 | 0.104 | 0.00072813 | T cells, CD8+, naive, stimulated |
| <b>Rnf44</b>     | 5.29E-08 | 0.448367571 | 0.247 | 0.104 | 0.00074853 | T cells, CD8+, naive, stimulated |
| <b>Cmtm6</b>     | 5.33E-08 | 0.462176054 | 0.229 | 0.094 | 0.00075417 | T cells, CD8+, naive, stimulated |
| <b>Srp54b</b>    | 5.58E-08 | 0.554430608 | 0.152 | 0.037 | 0.00079007 | T cells, CD8+, naive, stimulated |
| <b>Birc3</b>     | 5.71E-08 | 0.386018003 | 0.383 | 0.215 | 0.00080776 | T cells, CD8+, naive, stimulated |
| <b>Smap2</b>     | 5.81E-08 | 0.370051419 | 0.376 | 0.205 | 0.00082267 | T cells, CD8+, naive, stimulated |
| <b>M6pr</b>      | 5.84E-08 | 0.284394506 | 0.275 | 0.124 | 0.00082672 | T cells, CD8+, naive, stimulated |
| <b>Rras2</b>     | 6.24E-08 | 0.456717144 | 0.172 | 0.047 | 0.00088356 | T cells, CD8+, naive, stimulated |
| <b>Nfkb2</b>     | 6.68E-08 | 0.315805851 | 0.258 | 0.111 | 0.00094493 | T cells, CD8+, naive, stimulated |
| <b>Pgam1</b>     | 6.69E-08 | 0.400941152 | 0.254 | 0.104 | 0.00094729 | T cells, CD8+, naive, stimulated |
| <b>Vamp2</b>     | 7.38E-08 | 0.580480147 | 0.2   | 0.074 | 0.00104495 | T cells, CD8+, naive, stimulated |
| <b>U2af2</b>     | 7.74E-08 | 0.360447048 | 0.293 | 0.138 | 0.00109565 | T cells, CD8+, naive, stimulated |
| <b>Ccni</b>      | 7.74E-08 | 0.471648303 | 0.251 | 0.111 | 0.00109595 | T cells, CD8+, naive, stimulated |

|                |          |              |       |       |            |                                  |
|----------------|----------|--------------|-------|-------|------------|----------------------------------|
| <b>Tcf3</b>    | 8.35E-08 | 0.457108124  | 0.305 | 0.154 | 0.00118236 | T cells, CD8+, naive, stimulated |
| <b>Nsmce4a</b> | 8.4E-08  | 0.463884374  | 0.249 | 0.107 | 0.00118932 | T cells, CD8+, naive, stimulated |
| <b>Helz2</b>   | 8.45E-08 | 0.430978953  | 0.251 | 0.104 | 0.00119603 | T cells, CD8+, naive, stimulated |
| <b>Myc</b>     | 8.82E-08 | 0.694228974  | 0.225 | 0.087 | 0.00124856 | T cells, CD8+, naive, stimulated |
| <b>Pim3</b>    | 8.85E-08 | 0.506780954  | 0.212 | 0.077 | 0.00125305 | T cells, CD8+, naive, stimulated |
| <b>Traf5</b>   | 8.98E-08 | 0.472797363  | 0.169 | 0.047 | 0.00127197 | T cells, CD8+, naive, stimulated |
| <b>Plac8</b>   | 9.65E-08 | -1.094165313 | 0.417 | 0.477 | 0.00136658 | T cells, CD8+, naive, stimulated |
| <b>Rps3</b>    | 1.02E-07 | -0.268530371 | 0.996 | 0.876 | 0.00144135 | T cells, CD8+, naive, stimulated |
| <b>Myo1c</b>   | 1.02E-07 | 0.334074158  | 0.243 | 0.107 | 0.00144752 | T cells, CD8+, naive, stimulated |
| <b>Tubb5</b>   | 1.07E-07 | 0.308494849  | 0.428 | 0.245 | 0.00151473 | T cells, CD8+, naive, stimulated |
| <b>Dedd2</b>   | 1.07E-07 | 0.431783705  | 0.224 | 0.084 | 0.00151490 | T cells, CD8+, naive, stimulated |
| <b>Prkar1a</b> | 1.07E-07 | 0.350058806  | 0.469 | 0.279 | 0.00151817 | T cells, CD8+, naive, stimulated |
| <b>Lsm14a</b>  | 1.11E-07 | 0.501762635  | 0.194 | 0.07  | 0.00157507 | T cells, CD8+, naive, stimulated |
| <b>Map4k1</b>  | 1.18E-07 | 0.472477367  | 0.278 | 0.134 | 0.00166715 | T cells, CD8+, naive, stimulated |
| <b>Ppp1cb</b>  | 1.2E-07  | 0.302761798  | 0.227 | 0.087 | 0.00170268 | T cells, CD8+, naive, stimulated |
| <b>Ets2</b>    | 1.23E-07 | 0.524563345  | 0.24  | 0.104 | 0.00173754 | T cells, CD8+, naive, stimulated |
| <b>Cmpk1</b>   | 1.23E-07 | 0.586366677  | 0.253 | 0.117 | 0.00174717 | T cells, CD8+, naive, stimulated |
| <b>Snx8</b>    | 1.37E-07 | 0.448480302  | 0.299 | 0.144 | 0.00194233 | T cells, CD8+, naive, stimulated |
| <b>Rnf144a</b> | 1.38E-07 | 0.322474975  | 0.132 | 0.023 | 0.00195514 | T cells, CD8+, naive, stimulated |
| <b>Isca1</b>   | 1.39E-07 | 0.571210097  | 0.242 | 0.107 | 0.00196932 | T cells, CD8+, naive, stimulated |
| <b>Fbxo11</b>  | 1.41E-07 | 0.394029767  | 0.219 | 0.091 | 0.00200255 | T cells, CD8+, naive, stimulated |
| <b>Rasa3</b>   | 1.44E-07 | 0.357403507  | 0.372 | 0.205 | 0.00203425 | T cells, CD8+, naive, stimulated |
| <b>Sf3b4</b>   | 1.48E-07 | 0.392838763  | 0.262 | 0.117 | 0.00209512 | T cells, CD8+, naive, stimulated |
| <b>Atf7ip</b>  | 1.49E-07 | 0.405780946  | 0.283 | 0.138 | 0.00210547 | T cells, CD8+, naive, stimulated |
| <b>Pxdc1</b>   | 1.71E-07 | 0.400233938  | 0.131 | 0.023 | 0.00241424 | T cells, CD8+, naive, stimulated |
| <b>Ptpn6</b>   | 1.75E-07 | 0.386535808  | 0.383 | 0.208 | 0.00247924 | T cells, CD8+, naive, stimulated |
| <b>Ccng2</b>   | 1.78E-07 | 0.510666424  | 0.148 | 0.037 | 0.00251693 | T cells, CD8+, naive, stimulated |
| <b>Pax5</b>    | 1.78E-07 | 0.283638622  | 0.352 | 0.181 | 0.00252268 | T cells, CD8+, naive, stimulated |
| <b>Vasp</b>    | 1.85E-07 | 0.462639094  | 0.271 | 0.131 | 0.00261393 | T cells, CD8+, naive, stimulated |
| <b>H2-Eb2</b>  | 1.86E-07 | 0.405504931  | 0.206 | 0.074 | 0.00263073 | T cells, CD8+, naive, stimulated |
| <b>Aldh2</b>   | 1.89E-07 | 0.374498913  | 0.409 | 0.238 | 0.00266856 | T cells, CD8+, naive, stimulated |
| <b>Hspd1</b>   | 1.9E-07  | 0.273281242  | 0.583 | 0.396 | 0.00268816 | T cells, CD8+, naive, stimulated |
| <b>Erp29</b>   | 2.04E-07 | -0.733526819 | 0.452 | 0.517 | 0.00288725 | T cells, CD8+, naive, stimulated |
| <b>Sgms1</b>   | 2.06E-07 | 0.35108484   | 0.222 | 0.087 | 0.00291810 | T cells, CD8+, naive, stimulated |
| <b>G3bp1</b>   | 2.11E-07 | 0.379143241  | 0.28  | 0.138 | 0.00298779 | T cells, CD8+, naive, stimulated |

|                |          |              |       |       |            |                                  |
|----------------|----------|--------------|-------|-------|------------|----------------------------------|
| <b>Plcg2</b>   | 2.13E-07 | 0.295601515  | 0.319 | 0.168 | 0.00301129 | T cells, CD8+, naive, stimulated |
| <b>Trim28</b>  | 2.16E-07 | 0.479949791  | 0.217 | 0.091 | 0.00306303 | T cells, CD8+, naive, stimulated |
| <b>Coq10b</b>  | 2.26E-07 | 0.373600439  | 0.328 | 0.174 | 0.00319379 | T cells, CD8+, naive, stimulated |
| <b>Csnk1g3</b> | 2.28E-07 | 0.345676967  | 0.278 | 0.131 | 0.00323098 | T cells, CD8+, naive, stimulated |
| <b>Tpd52</b>   | 2.31E-07 | 0.493086812  | 0.266 | 0.128 | 0.00326649 | T cells, CD8+, naive, stimulated |
| <b>Neu1</b>    | 2.31E-07 | 0.425866352  | 0.213 | 0.084 | 0.00327048 | T cells, CD8+, naive, stimulated |
| <b>Wtap</b>    | 2.43E-07 | 0.439632801  | 0.186 | 0.067 | 0.00344012 | T cells, CD8+, naive, stimulated |
| <b>Kpna4</b>   | 2.51E-07 | 0.304998294  | 0.319 | 0.161 | 0.00354639 | T cells, CD8+, naive, stimulated |
| <b>Mirt1</b>   | 2.54E-07 | 0.464958463  | 0.197 | 0.074 | 0.00359362 | T cells, CD8+, naive, stimulated |
| <b>Add1</b>    | 2.67E-07 | 0.465759051  | 0.268 | 0.131 | 0.00378426 | T cells, CD8+, naive, stimulated |
| <b>Cdt1</b>    | 2.68E-07 | 0.353428787  | 0.245 | 0.104 | 0.00379478 | T cells, CD8+, naive, stimulated |
| <b>Malat1</b>  | 2.73E-07 | -1.080874102 | 0.996 | 0.977 | 0.00386857 | T cells, CD8+, naive, stimulated |
| <b>Rftn1</b>   | 2.87E-07 | 0.446212056  | 0.221 | 0.094 | 0.00405987 | T cells, CD8+, naive, stimulated |
| <b>Hnrnpm</b>  | 2.9E-07  | 0.332783618  | 0.279 | 0.128 | 0.00410214 | T cells, CD8+, naive, stimulated |
| <b>Zc3hav1</b> | 3.09E-07 | 0.32446636   | 0.277 | 0.131 | 0.00438104 | T cells, CD8+, naive, stimulated |
| <b>Litaf</b>   | 3.22E-07 | 0.412772555  | 0.536 | 0.352 | 0.00456290 | T cells, CD8+, naive, stimulated |
| <b>Nxf1</b>    | 3.26E-07 | 0.324611531  | 0.255 | 0.117 | 0.00460845 | T cells, CD8+, naive, stimulated |
| <b>Rfk</b>     | 3.3E-07  | 0.51962175   | 0.233 | 0.104 | 0.00466787 | T cells, CD8+, naive, stimulated |
| <b>Plaur</b>   | 3.5E-07  | 0.44690034   | 0.414 | 0.242 | 0.00495449 | T cells, CD8+, naive, stimulated |
| <b>Ctps2</b>   | 3.51E-07 | 0.507389759  | 0.137 | 0.034 | 0.00497264 | T cells, CD8+, naive, stimulated |
| <b>Rasgrp2</b> | 3.68E-07 | 0.297429715  | 0.502 | 0.302 | 0.00520910 | T cells, CD8+, naive, stimulated |
| <b>Ctdsp1</b>  | 3.89E-07 | 0.510974935  | 0.152 | 0.044 | 0.00551283 | T cells, CD8+, naive, stimulated |
| <b>Bin1</b>    | 3.97E-07 | 0.33061807   | 0.278 | 0.131 | 0.00561788 | T cells, CD8+, naive, stimulated |
| <b>Zdhhc18</b> | 4E-07    | 0.430525831  | 0.155 | 0.044 | 0.00566254 | T cells, CD8+, naive, stimulated |
| <b>Dgka</b>    | 4.05E-07 | 0.35817382   | 0.231 | 0.097 | 0.00572818 | T cells, CD8+, naive, stimulated |
| <b>Galnt1</b>  | 4.11E-07 | 0.428649648  | 0.19  | 0.07  | 0.00581637 | T cells, CD8+, naive, stimulated |
| <b>Sypl</b>    | 4.19E-07 | 0.401935957  | 0.292 | 0.151 | 0.00592566 | T cells, CD8+, naive, stimulated |
| <b>Fos</b>     | 4.21E-07 | 0.456466366  | 0.643 | 0.473 | 0.00596156 | T cells, CD8+, naive, stimulated |
| <b>Cct3</b>    | 4.23E-07 | 0.400846923  | 0.267 | 0.131 | 0.00598437 | T cells, CD8+, naive, stimulated |
| <b>VeZF1</b>   | 4.27E-07 | 0.428507317  | 0.194 | 0.074 | 0.00603857 | T cells, CD8+, naive, stimulated |
| <b>Lrrk2</b>   | 4.31E-07 | 0.280310162  | 0.206 | 0.074 | 0.00609573 | T cells, CD8+, naive, stimulated |
| <b>Cbx7</b>    | 4.31E-07 | 0.399998706  | 0.164 | 0.05  | 0.00609832 | T cells, CD8+, naive, stimulated |
| <b>Plekho2</b> | 4.32E-07 | 0.507613234  | 0.282 | 0.144 | 0.00611119 | T cells, CD8+, naive, stimulated |
| <b>Tfeb</b>    | 4.36E-07 | 0.47377236   | 0.146 | 0.04  | 0.00617520 | T cells, CD8+, naive, stimulated |
| <b>Elavl1</b>  | 4.68E-07 | 0.45129762   | 0.263 | 0.131 | 0.00661818 | T cells, CD8+, naive, stimulated |

|                  |          |              |       |       |            |                                  |
|------------------|----------|--------------|-------|-------|------------|----------------------------------|
| <b>Ndufa3</b>    | 4.69E-07 | 0.262901627  | 0.57  | 0.352 | 0.00663335 | T cells, CD8+, naive, stimulated |
| <b>Dcaf12</b>    | 4.7E-07  | 0.445137104  | 0.184 | 0.067 | 0.00665602 | T cells, CD8+, naive, stimulated |
| <b>Rab7</b>      | 4.71E-07 | 0.516066514  | 0.274 | 0.144 | 0.00667176 | T cells, CD8+, naive, stimulated |
| <b>Lpcat1</b>    | 4.88E-07 | 0.332650776  | 0.209 | 0.081 | 0.00690415 | T cells, CD8+, naive, stimulated |
| <b>Pink1</b>     | 4.91E-07 | 0.570583237  | 0.203 | 0.084 | 0.00695165 | T cells, CD8+, naive, stimulated |
| <b>Tfrc</b>      | 5.16E-07 | 0.358452498  | 0.122 | 0.023 | 0.00730635 | T cells, CD8+, naive, stimulated |
| <b>Thrap3</b>    | 5.21E-07 | 0.357198726  | 0.297 | 0.151 | 0.00737120 | T cells, CD8+, naive, stimulated |
| <b>Gorasp2</b>   | 5.37E-07 | 0.368156674  | 0.282 | 0.138 | 0.00760404 | T cells, CD8+, naive, stimulated |
| <b>Cdc25b</b>    | 5.43E-07 | 0.360603553  | 0.166 | 0.054 | 0.00768647 | T cells, CD8+, naive, stimulated |
| <b>Hexb</b>      | 5.47E-07 | 0.397528767  | 0.294 | 0.151 | 0.00774345 | T cells, CD8+, naive, stimulated |
| <b>Gpr132</b>    | 5.53E-07 | 0.282105489  | 0.321 | 0.164 | 0.00782184 | T cells, CD8+, naive, stimulated |
| <b>S1pr4</b>     | 5.62E-07 | 0.421812163  | 0.23  | 0.097 | 0.00794965 | T cells, CD8+, naive, stimulated |
| <b>Grk6</b>      | 5.69E-07 | 0.371910209  | 0.314 | 0.171 | 0.00805370 | T cells, CD8+, naive, stimulated |
| <b>Pnrc2</b>     | 5.69E-07 | 0.45997391   | 0.18  | 0.067 | 0.00805485 | T cells, CD8+, naive, stimulated |
| <b>Tm9sf2</b>    | 5.78E-07 | 0.326479045  | 0.219 | 0.094 | 0.00817511 | T cells, CD8+, naive, stimulated |
| <b>Smarcd2</b>   | 6.16E-07 | 0.467767881  | 0.179 | 0.067 | 0.00872480 | T cells, CD8+, naive, stimulated |
| <b>Prpf38a</b>   | 6.21E-07 | 0.416366092  | 0.174 | 0.06  | 0.00879574 | T cells, CD8+, naive, stimulated |
| <b>Ddx3x</b>     | 6.24E-07 | 0.294238328  | 0.314 | 0.168 | 0.00883834 | T cells, CD8+, naive, stimulated |
| <b>Mat2b</b>     | 6.61E-07 | 0.418259832  | 0.191 | 0.074 | 0.00935527 | T cells, CD8+, naive, stimulated |
| <b>Mob1a</b>     | 6.72E-07 | 0.353449628  | 0.218 | 0.091 | 0.00950852 | T cells, CD8+, naive, stimulated |
| <b>Tcp1</b>      | 7.35E-07 | 0.408882637  | 0.351 | 0.205 | 0.01041070 | T cells, CD8+, naive, stimulated |
| <b>Srek1</b>     | 7.43E-07 | -0.570354868 | 0.044 | 0.114 | 0.01051405 | T cells, CD8+, naive, stimulated |
| <b>Brd4</b>      | 7.44E-07 | 0.474865187  | 0.321 | 0.185 | 0.01053647 | T cells, CD8+, naive, stimulated |
| <b>Ppp1r2</b>    | 7.57E-07 | 0.389440166  | 0.292 | 0.151 | 0.01072095 | T cells, CD8+, naive, stimulated |
| <b>Sik1</b>      | 7.59E-07 | 0.267241084  | 0.379 | 0.218 | 0.01074575 | T cells, CD8+, naive, stimulated |
| <b>Anp32e</b>    | 7.85E-07 | 0.402666878  | 0.286 | 0.144 | 0.01110647 | T cells, CD8+, naive, stimulated |
| <b>Gt(ROSA)2</b> | 8.14E-07 | 0.393254212  | 0.184 | 0.067 | 0.01152725 | T cells, CD8+, naive, stimulated |
| <b>Golph3</b>    | 8.27E-07 | 0.554838191  | 0.155 | 0.05  | 0.01170920 | T cells, CD8+, naive, stimulated |
| <b>Btk</b>       | 8.62E-07 | 0.487764148  | 0.256 | 0.128 | 0.01220057 | T cells, CD8+, naive, stimulated |
| <b>Skil</b>      | 8.63E-07 | 0.406860031  | 0.204 | 0.084 | 0.01221333 | T cells, CD8+, naive, stimulated |
| <b>Kras</b>      | 8.7E-07  | 0.34132678   | 0.369 | 0.218 | 0.01231393 | T cells, CD8+, naive, stimulated |
| <b>mt-Atp6</b>   | 9.02E-07 | -0.694953839 | 0.975 | 0.923 | 0.01277355 | T cells, CD8+, naive, stimulated |
| <b>Dnaja2</b>    | 9.11E-07 | 0.35759366   | 0.307 | 0.161 | 0.01289177 | T cells, CD8+, naive, stimulated |
| <b>Skp1a</b>     | 9.14E-07 | 0.274211647  | 0.41  | 0.248 | 0.01294175 | T cells, CD8+, naive, stimulated |
| <b>Ifnar1</b>    | 9.19E-07 | 0.410990373  | 0.259 | 0.128 | 0.01300411 | T cells, CD8+, naive, stimulated |

|                 |          |              |       |       |            |                                  |
|-----------------|----------|--------------|-------|-------|------------|----------------------------------|
| <b>Ptbp1</b>    | 9.26E-07 | 0.375975452  | 0.299 | 0.154 | 0.01311184 | T cells, CD8+, naive, stimulated |
| <b>Syf2</b>     | 9.3E-07  | 0.283354537  | 0.407 | 0.242 | 0.01316255 | T cells, CD8+, naive, stimulated |
| <b>Canx</b>     | 9.51E-07 | 0.26476015   | 0.29  | 0.148 | 0.01346470 | T cells, CD8+, naive, stimulated |
| <b>Ginm1</b>    | 9.56E-07 | 0.497973289  | 0.145 | 0.044 | 0.01353846 | T cells, CD8+, naive, stimulated |
| <b>Ywhae</b>    | 9.71E-07 | 0.351140182  | 0.371 | 0.221 | 0.01374003 | T cells, CD8+, naive, stimulated |
| <b>Supt5</b>    | 9.84E-07 | 0.280317208  | 0.199 | 0.081 | 0.01392656 | T cells, CD8+, naive, stimulated |
| <b>Pcna</b>     | 1.09E-06 | 0.461770313  | 0.237 | 0.111 | 0.01545655 | T cells, CD8+, naive, stimulated |
| <b>Srebfb2</b>  | 1.09E-06 | 0.386798202  | 0.226 | 0.107 | 0.01546415 | T cells, CD8+, naive, stimulated |
| <b>Kif5b</b>    | 1.13E-06 | 0.386096812  | 0.287 | 0.151 | 0.01604557 | T cells, CD8+, naive, stimulated |
| <b>Bmp2k</b>    | 1.13E-06 | 0.292049287  | 0.181 | 0.067 | 0.01606656 | T cells, CD8+, naive, stimulated |
| <b>Tmem108</b>  | 1.17E-06 | 0.320196104  | 0.18  | 0.06  | 0.01650844 | T cells, CD8+, naive, stimulated |
| <b>BC005537</b> | 1.22E-06 | 0.410497863  | 0.249 | 0.124 | 0.01726168 | T cells, CD8+, naive, stimulated |
| <b>Rpia</b>     | 1.29E-06 | 0.637974322  | 0.201 | 0.091 | 0.01826530 | T cells, CD8+, naive, stimulated |
| <b>Irak2</b>    | 1.42E-06 | 0.467512643  | 0.172 | 0.064 | 0.02006940 | T cells, CD8+, naive, stimulated |
| <b>Evi2a</b>    | 1.43E-06 | -0.296435666 | 0.043 | 0.114 | 0.02027950 | T cells, CD8+, naive, stimulated |
| <b>Ptms</b>     | 1.51E-06 | -0.404894608 | 0.052 | 0.128 | 0.02144580 | T cells, CD8+, naive, stimulated |
| <b>Cmah</b>     | 1.54E-06 | 0.27856382   | 0.269 | 0.131 | 0.02181795 | T cells, CD8+, naive, stimulated |
| <b>Cbfb</b>     | 1.71E-06 | 0.406552352  | 0.193 | 0.081 | 0.02421547 | T cells, CD8+, naive, stimulated |
| <b>Gucd1</b>    | 1.75E-06 | 0.378633564  | 0.136 | 0.037 | 0.02482706 | T cells, CD8+, naive, stimulated |
| <b>Atp5k</b>    | 1.8E-06  | 0.392485173  | 0.377 | 0.232 | 0.02554366 | T cells, CD8+, naive, stimulated |
| <b>Zc3h12a</b>  | 1.81E-06 | 0.286551551  | 0.232 | 0.107 | 0.02559787 | T cells, CD8+, naive, stimulated |
| <b>Zfp622</b>   | 1.87E-06 | 0.437701645  | 0.218 | 0.097 | 0.02650686 | T cells, CD8+, naive, stimulated |
| <b>Paip2</b>    | 1.87E-06 | 0.401837089  | 0.448 | 0.285 | 0.02651522 | T cells, CD8+, naive, stimulated |
| <b>Msi2</b>     | 1.87E-06 | 0.356917331  | 0.124 | 0.03  | 0.02652552 | T cells, CD8+, naive, stimulated |
| <b>Heg1</b>     | 1.94E-06 | 0.370189373  | 0.194 | 0.077 | 0.02740194 | T cells, CD8+, naive, stimulated |
| <b>Ifrd1</b>    | 1.97E-06 | 0.321972953  | 0.364 | 0.201 | 0.02786098 | T cells, CD8+, naive, stimulated |
| <b>Abi1</b>     | 2.03E-06 | 0.281205341  | 0.207 | 0.087 | 0.02875057 | T cells, CD8+, naive, stimulated |
| <b>Tm9sf3</b>   | 2.31E-06 | 0.446125446  | 0.198 | 0.087 | 0.03263529 | T cells, CD8+, naive, stimulated |
| <b>Npc2</b>     | 2.37E-06 | -0.790748583 | 0.266 | 0.366 | 0.03360802 | T cells, CD8+, naive, stimulated |
| <b>Mcrs1</b>    | 2.4E-06  | 0.355686528  | 0.144 | 0.044 | 0.03394738 | T cells, CD8+, naive, stimulated |
| <b>Eif3l</b>    | 2.49E-06 | 0.396951122  | 0.206 | 0.094 | 0.03517950 | T cells, CD8+, naive, stimulated |
| <b>Rac2</b>     | 2.49E-06 | -0.641662471 | 0.74  | 0.661 | 0.03528863 | T cells, CD8+, naive, stimulated |
| <b>Mapk1</b>    | 2.5E-06  | 0.301578875  | 0.241 | 0.121 | 0.03543073 | T cells, CD8+, naive, stimulated |
| <b>Myadm</b>    | 2.52E-06 | 0.545351075  | 0.213 | 0.101 | 0.03566596 | T cells, CD8+, naive, stimulated |
| <b>Rpl28</b>    | 2.57E-06 | -0.252177323 | 0.993 | 0.862 | 0.03632912 | T cells, CD8+, naive, stimulated |

|                |          |              |       |       |            |                                  |
|----------------|----------|--------------|-------|-------|------------|----------------------------------|
| <b>Rassf5</b>  | 2.64E-06 | 0.352713077  | 0.143 | 0.044 | 0.03743276 | T cells, CD8+, naive, stimulated |
| <b>Ppp2r1a</b> | 2.66E-06 | 0.332691165  | 0.234 | 0.117 | 0.03764666 | T cells, CD8+, naive, stimulated |
| <b>Wac</b>     | 2.85E-06 | 0.382395052  | 0.227 | 0.111 | 0.04033826 | T cells, CD8+, naive, stimulated |
| <b>Tmem243</b> | 2.94E-06 | 0.399251238  | 0.32  | 0.185 | 0.04162906 | T cells, CD8+, naive, stimulated |
| <b>Rassf4</b>  | 2.94E-06 | -0.449031841 | 0.064 | 0.144 | 0.04165885 | T cells, CD8+, naive, stimulated |
| <b>Fam220a</b> | 3.02E-06 | 0.420256146  | 0.119 | 0.03  | 0.04273680 | T cells, CD8+, naive, stimulated |
| <b>Map3k1</b>  | 3.02E-06 | 0.257929043  | 0.222 | 0.101 | 0.04277507 | T cells, CD8+, naive, stimulated |
| <b>Mtpn</b>    | 3.17E-06 | 0.427735361  | 0.32  | 0.198 | 0.04484306 | T cells, CD8+, naive, stimulated |
| <b>Rnf130</b>  | 3.28E-06 | 0.457982537  | 0.187 | 0.081 | 0.04641072 | T cells, CD8+, naive, stimulated |
| <b>Txnbc5</b>  | 3.3E-06  | 0.284684959  | 0.234 | 0.111 | 0.04666283 | T cells, CD8+, naive, stimulated |
| <b>Cd200</b>   | 3.33E-06 | 0.457767456  | 0.141 | 0.044 | 0.04715704 | T cells, CD8+, naive, stimulated |
| <b>Spib</b>    | 3.36E-06 | 0.425002295  | 0.275 | 0.144 | 0.04753493 | T cells, CD8+, naive, stimulated |
| <b>Ccl5</b>    | 3.01E-98 | 2.09945865   | 0.445 | 0.03  | 4.26E-94   | T cells, CD4+, naive, stimulated |
| <b>Btg1</b>    | 3.61E-71 | -1.853404152 | 0.697 | 0.959 | 5.1E-67    | T cells, CD4+, naive, stimulated |
| <b>Rps29</b>   | 4.62E-67 | -1.037596704 | 0.962 | 0.976 | 6.53E-63   | T cells, CD4+, naive, stimulated |
| <b>Rplp0</b>   | 5.69E-62 | 0.928887449  | 1     | 0.97  | 8.06E-58   | T cells, CD4+, naive, stimulated |
| <b>Rpsa</b>    | 6.9E-57  | 0.745193981  | 1     | 0.978 | 9.77E-53   | T cells, CD4+, naive, stimulated |
| <b>Klf2</b>    | 1.01E-55 | -1.718987534 | 0.748 | 0.946 | 1.43E-51   | T cells, CD4+, naive, stimulated |
| <b>Eef1a1</b>  | 2.23E-55 | -0.828783844 | 0.958 | 0.98  | 3.16E-51   | T cells, CD4+, naive, stimulated |
| <b>Rps27rt</b> | 2.94E-55 | 1.983520136  | 0.689 | 0.28  | 4.17E-51   | T cells, CD4+, naive, stimulated |
| <b>Nr4a1</b>   | 4.41E-54 | -2.112406968 | 0.496 | 0.86  | 6.24E-50   | T cells, CD4+, naive, stimulated |
| <b>Rpl13</b>   | 5.59E-54 | 0.65173067   | 1     | 0.98  | 7.91E-50   | T cells, CD4+, naive, stimulated |
| <b>Rps4x</b>   | 2.25E-50 | 0.664447509  | 1     | 0.974 | 3.19E-46   | T cells, CD4+, naive, stimulated |
| <b>Jund</b>    | 9.84E-49 | -1.286762161 | 0.765 | 0.959 | 1.39E-44   | T cells, CD4+, naive, stimulated |
| <b>Rps27</b>   | 3.13E-48 | -0.745864878 | 0.979 | 0.981 | 4.43E-44   | T cells, CD4+, naive, stimulated |
| <b>Hspa8</b>   | 6.19E-48 | -1.75687086  | 0.739 | 0.944 | 8.77E-44   | T cells, CD4+, naive, stimulated |
| <b>Rps2</b>    | 3.04E-46 | 0.724415041  | 0.996 | 0.983 | 4.3E-42    | T cells, CD4+, naive, stimulated |
| <b>Rps8</b>    | 4.84E-45 | 0.584213578  | 1     | 0.982 | 6.85E-41   | T cells, CD4+, naive, stimulated |
| <b>Junb</b>    | 2.98E-43 | -1.427326545 | 0.723 | 0.936 | 4.22E-39   | T cells, CD4+, naive, stimulated |
| <b>Rps3a1</b>  | 7.56E-43 | 0.583305736  | 1     | 0.981 | 1.07E-38   | T cells, CD4+, naive, stimulated |
| <b>Cxcr4</b>   | 1.84E-42 | -1.979066279 | 0.134 | 0.611 | 2.61E-38   | T cells, CD4+, naive, stimulated |
| <b>Stk17b</b>  | 5.35E-42 | -1.418845189 | 0.458 | 0.852 | 7.58E-38   | T cells, CD4+, naive, stimulated |
| <b>Rps28</b>   | 5.63E-41 | -0.698493057 | 0.945 | 0.972 | 7.97E-37   | T cells, CD4+, naive, stimulated |
| <b>Rps5</b>    | 1.04E-40 | 0.636181141  | 0.996 | 0.975 | 1.47E-36   | T cells, CD4+, naive, stimulated |
| <b>Rpl18</b>   | 1.05E-40 | 0.689922458  | 0.996 | 0.972 | 1.48E-36   | T cells, CD4+, naive, stimulated |

|                 |          |              |       |       |          |                                  |
|-----------------|----------|--------------|-------|-------|----------|----------------------------------|
| <b>Rpl35a</b>   | 2.32E-40 | -0.608680726 | 0.975 | 0.967 | 3.29E-36 | T cells, CD4+, naive, stimulated |
| <b>Dusp2</b>    | 5.22E-40 | -1.546835099 | 0.324 | 0.762 | 7.39E-36 | T cells, CD4+, naive, stimulated |
| <b>Eef2</b>     | 1.52E-39 | -0.931654004 | 0.668 | 0.948 | 2.16E-35 | T cells, CD4+, naive, stimulated |
| <b>Rps7</b>     | 2.74E-38 | 0.556242198  | 1     | 0.978 | 3.88E-34 | T cells, CD4+, naive, stimulated |
| <b>Tsc22d3</b>  | 2.78E-38 | -1.228670149 | 0.487 | 0.864 | 3.93E-34 | T cells, CD4+, naive, stimulated |
| <b>Rps9</b>     | 1.56E-37 | 0.625384476  | 0.987 | 0.962 | 2.21E-33 | T cells, CD4+, naive, stimulated |
| <b>Cytip</b>    | 2.05E-37 | -1.422467842 | 0.345 | 0.778 | 2.91E-33 | T cells, CD4+, naive, stimulated |
| <b>Rpl11</b>    | 2.42E-37 | 0.597172884  | 0.987 | 0.972 | 3.43E-33 | T cells, CD4+, naive, stimulated |
| <b>Rps11</b>    | 4.99E-37 | 0.661709106  | 0.987 | 0.972 | 7.07E-33 | T cells, CD4+, naive, stimulated |
| <b>Ccr7</b>     | 1.37E-35 | -1.306705258 | 0.584 | 0.885 | 1.94E-31 | T cells, CD4+, naive, stimulated |
| <b>Rpl9-ps6</b> | 3.68E-35 | 0.545957583  | 0.996 | 0.972 | 5.2E-31  | T cells, CD4+, naive, stimulated |
| <b>Rpl8</b>     | 4.09E-35 | 0.56434231   | 0.996 | 0.975 | 5.79E-31 | T cells, CD4+, naive, stimulated |
| <b>Ets1</b>     | 1.76E-34 | -1.222092378 | 0.345 | 0.775 | 2.48E-30 | T cells, CD4+, naive, stimulated |
| <b>Rpl10a</b>   | 1.81E-34 | 0.700237593  | 0.975 | 0.961 | 2.56E-30 | T cells, CD4+, naive, stimulated |
| <b>Ifi30</b>    | 3.15E-34 | 1.563469354  | 0.685 | 0.367 | 4.45E-30 | T cells, CD4+, naive, stimulated |
| <b>S100a6</b>   | 1.24E-33 | 2.597059909  | 0.273 | 0.051 | 1.75E-29 | T cells, CD4+, naive, stimulated |
| <b>Rps3</b>     | 4.23E-33 | 0.575768998  | 0.992 | 0.973 | 5.99E-29 | T cells, CD4+, naive, stimulated |
| <b>Rpl19</b>    | 8.5E-33  | 0.483678977  | 0.996 | 0.979 | 1.2E-28  | T cells, CD4+, naive, stimulated |
| <b>mt-Nd4l</b>  | 1.48E-32 | -0.800514287 | 0.849 | 0.987 | 2.1E-28  | T cells, CD4+, naive, stimulated |
| <b>Rpl6</b>     | 3.06E-32 | 0.540057797  | 1     | 0.978 | 4.33E-28 | T cells, CD4+, naive, stimulated |
| <b>Ier5</b>     | 1.79E-31 | -1.270117107 | 0.294 | 0.709 | 2.53E-27 | T cells, CD4+, naive, stimulated |
| <b>Rpl18a</b>   | 2.65E-31 | 0.536807385  | 0.996 | 0.974 | 3.75E-27 | T cells, CD4+, naive, stimulated |
| <b>Rps10</b>    | 4.16E-31 | 0.497691755  | 0.992 | 0.97  | 5.89E-27 | T cells, CD4+, naive, stimulated |
| <b>mt-Nd3</b>   | 1.06E-30 | -1.323693629 | 0.214 | 0.627 | 1.5E-26  | T cells, CD4+, naive, stimulated |
| <b>Hspa1a</b>   | 1.56E-30 | -3.320935889 | 0.244 | 0.587 | 2.21E-26 | T cells, CD4+, naive, stimulated |
| <b>Gapdh</b>    | 3.57E-30 | 0.982196844  | 0.916 | 0.862 | 5.06E-26 | T cells, CD4+, naive, stimulated |
| <b>Rap1b</b>    | 1.4E-29  | -1.255985542 | 0.282 | 0.68  | 1.99E-25 | T cells, CD4+, naive, stimulated |
| <b>Ddx5</b>     | 1.79E-29 | -0.803986884 | 0.706 | 0.953 | 2.53E-25 | T cells, CD4+, naive, stimulated |
| <b>Rpl28</b>    | 2.04E-29 | 0.559176035  | 0.983 | 0.968 | 2.88E-25 | T cells, CD4+, naive, stimulated |
| <b>Rpl29</b>    | 2.45E-29 | 0.674151005  | 0.971 | 0.953 | 3.47E-25 | T cells, CD4+, naive, stimulated |
| <b>Ywhaz</b>    | 1.38E-28 | -0.99265293  | 0.475 | 0.843 | 1.96E-24 | T cells, CD4+, naive, stimulated |
| <b>Hnrnpf</b>   | 4.8E-28  | -1.153789793 | 0.34  | 0.715 | 6.8E-24  | T cells, CD4+, naive, stimulated |
| <b>Serp1</b>    | 1.14E-27 | -0.91677607  | 0.542 | 0.858 | 1.61E-23 | T cells, CD4+, naive, stimulated |
| <b>Fam107b</b>  | 3.97E-27 | -1.2580875   | 0.353 | 0.708 | 5.63E-23 | T cells, CD4+, naive, stimulated |
| <b>Pabpc1</b>   | 8.32E-27 | -0.922026087 | 0.508 | 0.862 | 1.18E-22 | T cells, CD4+, naive, stimulated |



|                |          |              |       |       |          |                                  |
|----------------|----------|--------------|-------|-------|----------|----------------------------------|
| <b>Rpl38</b>   | 1.36E-26 | -0.531250906 | 0.941 | 0.974 | 1.92E-22 | T cells, CD4+, naive, stimulated |
| <b>Vps37b</b>  | 1.77E-26 | -1.379247382 | 0.324 | 0.682 | 2.5E-22  | T cells, CD4+, naive, stimulated |
| <b>Fcer2a</b>  | 3.07E-26 | -1.263585337 | 0.193 | 0.593 | 4.35E-22 | T cells, CD4+, naive, stimulated |
| <b>Snx5</b>    | 3.68E-26 | -1.181845189 | 0.282 | 0.666 | 5.21E-22 | T cells, CD4+, naive, stimulated |
| <b>mt-Atp8</b> | 3.75E-26 | -0.60267521  | 0.958 | 0.999 | 5.31E-22 | T cells, CD4+, naive, stimulated |
| <b>Hsph1</b>   | 9.99E-26 | -1.722162695 | 0.218 | 0.568 | 1.41E-21 | T cells, CD4+, naive, stimulated |
| <b>Dusp1</b>   | 1.06E-25 | -1.463860792 | 0.189 | 0.566 | 1.5E-21  | T cells, CD4+, naive, stimulated |
| <b>Lgals1</b>  | 1.39E-25 | 1.00396364   | 0.239 | 0.049 | 1.96E-21 | T cells, CD4+, naive, stimulated |
| <b>Serinc3</b> | 1.49E-25 | -0.936695055 | 0.403 | 0.785 | 2.12E-21 | T cells, CD4+, naive, stimulated |
| <b>Cd79a</b>   | 2.43E-25 | 0.629505419  | 0.979 | 0.977 | 3.44E-21 | T cells, CD4+, naive, stimulated |
| <b>Rps20</b>   | 2.85E-25 | 0.412009166  | 0.996 | 0.978 | 4.03E-21 | T cells, CD4+, naive, stimulated |
| <b>Rhob</b>    | 3.52E-25 | -1.546283437 | 0.172 | 0.527 | 4.99E-21 | T cells, CD4+, naive, stimulated |
| <b>Pcbp2</b>   | 2.42E-24 | -0.923822023 | 0.399 | 0.781 | 3.42E-20 | T cells, CD4+, naive, stimulated |
| <b>Clic1</b>   | 2.61E-24 | 1.041166447  | 0.744 | 0.554 | 3.7E-20  | T cells, CD4+, naive, stimulated |
| <b>Cnbp</b>    | 3.99E-24 | -0.863947033 | 0.504 | 0.839 | 5.65E-20 | T cells, CD4+, naive, stimulated |
| <b>Zfp36l2</b> | 1.35E-23 | -1.287792774 | 0.227 | 0.578 | 1.92E-19 | T cells, CD4+, naive, stimulated |
| <b>Rpl15</b>   | 6.41E-23 | 0.583177285  | 0.962 | 0.955 | 9.08E-19 | T cells, CD4+, naive, stimulated |
| <b>Rpl24</b>   | 6.85E-23 | 0.581735877  | 0.958 | 0.936 | 9.7E-19  | T cells, CD4+, naive, stimulated |
| <b>Satb1</b>   | 8.3E-23  | -1.160660144 | 0.164 | 0.515 | 1.18E-18 | T cells, CD4+, naive, stimulated |
| <b>Ezr</b>     | 9.91E-23 | -0.996368592 | 0.37  | 0.725 | 1.4E-18  | T cells, CD4+, naive, stimulated |
| <b>Tomm6</b>   | 3.52E-22 | 1.115025549  | 0.437 | 0.179 | 4.99E-18 | T cells, CD4+, naive, stimulated |
| <b>Dazap2</b>  | 5.23E-22 | -0.973275393 | 0.345 | 0.672 | 7.4E-18  | T cells, CD4+, naive, stimulated |
| <b>Actg1</b>   | 5.84E-22 | -0.726398913 | 0.702 | 0.93  | 8.27E-18 | T cells, CD4+, naive, stimulated |
| <b>Zfp36</b>   | 6.81E-22 | -0.973385347 | 0.458 | 0.787 | 9.64E-18 | T cells, CD4+, naive, stimulated |
| <b>Rpl32</b>   | 1.08E-21 | 0.436226356  | 0.983 | 0.97  | 1.53E-17 | T cells, CD4+, naive, stimulated |
| <b>Bach2</b>   | 2.34E-21 | -1.193382106 | 0.126 | 0.467 | 3.32E-17 | T cells, CD4+, naive, stimulated |
| <b>Anxa2</b>   | 3.39E-21 | 0.665589667  | 0.122 | 0.013 | 4.79E-17 | T cells, CD4+, naive, stimulated |
| <b>Hspa1b</b>  | 3.72E-21 | -1.684650661 | 0.307 | 0.608 | 5.27E-17 | T cells, CD4+, naive, stimulated |
| <b>P2ry10</b>  | 5.03E-21 | -1.170707287 | 0.185 | 0.509 | 7.12E-17 | T cells, CD4+, naive, stimulated |
| <b>Tcp11l2</b> | 7.48E-21 | -1.208376141 | 0.185 | 0.513 | 1.06E-16 | T cells, CD4+, naive, stimulated |
| <b>Actb</b>    | 9.89E-21 | 0.563294452  | 0.996 | 0.991 | 1.4E-16  | T cells, CD4+, naive, stimulated |
| <b>Rpl23</b>   | 9.9E-21  | 0.384900468  | 0.996 | 0.974 | 1.4E-16  | T cells, CD4+, naive, stimulated |
| <b>Syk</b>     | 1.85E-20 | -1.0099696   | 0.227 | 0.585 | 2.62E-16 | T cells, CD4+, naive, stimulated |
| <b>Dnajb1</b>  | 2.09E-20 | -1.761793248 | 0.441 | 0.696 | 2.96E-16 | T cells, CD4+, naive, stimulated |
| <b>Naca</b>    | 2.5E-20  | 0.690879993  | 0.895 | 0.866 | 3.54E-16 | T cells, CD4+, naive, stimulated |

|                  |          |              |       |       |          |                                  |
|------------------|----------|--------------|-------|-------|----------|----------------------------------|
| <b>Cfap43</b>    | 4.11E-20 | -1.261768112 | 0.025 | 0.308 | 5.81E-16 | T cells, CD4+, naive, stimulated |
| <b>Rps12</b>     | 5.15E-20 | 0.608661805  | 0.954 | 0.942 | 7.29E-16 | T cells, CD4+, naive, stimulated |
| <b>Ubc</b>       | 6.43E-20 | -0.957165385 | 0.504 | 0.787 | 9.1E-16  | T cells, CD4+, naive, stimulated |
| <b>H2-D1</b>     | 1.06E-19 | -0.530218081 | 0.878 | 0.973 | 1.5E-15  | T cells, CD4+, naive, stimulated |
| <b>Klf6</b>      | 1.23E-19 | -1.08614151  | 0.378 | 0.696 | 1.74E-15 | T cells, CD4+, naive, stimulated |
| <b>Cd19</b>      | 1.74E-19 | -0.877144334 | 0.332 | 0.684 | 2.46E-15 | T cells, CD4+, naive, stimulated |
| <b>Rps26</b>     | 2.13E-19 | 0.415350847  | 0.992 | 0.968 | 3.01E-15 | T cells, CD4+, naive, stimulated |
| <b>Plac8</b>     | 3.12E-19 | 1.410423491  | 0.588 | 0.401 | 4.41E-15 | T cells, CD4+, naive, stimulated |
| <b>Pnrc1</b>     | 4.46E-19 | -0.818333984 | 0.559 | 0.81  | 6.32E-15 | T cells, CD4+, naive, stimulated |
| <b>Rpl14</b>     | 4.48E-19 | 0.554892659  | 0.929 | 0.928 | 6.34E-15 | T cells, CD4+, naive, stimulated |
| <b>Plk2</b>      | 5.67E-19 | -1.593864553 | 0.059 | 0.348 | 8.03E-15 | T cells, CD4+, naive, stimulated |
| <b>Arf6</b>      | 5.74E-19 | -0.881641796 | 0.294 | 0.63  | 8.12E-15 | T cells, CD4+, naive, stimulated |
| <b>Cd79b</b>     | 6.02E-19 | 0.803197422  | 0.882 | 0.837 | 8.52E-15 | T cells, CD4+, naive, stimulated |
| <b>Rpl10-ps3</b> | 6.63E-19 | 0.512971304  | 0.937 | 0.933 | 9.39E-15 | T cells, CD4+, naive, stimulated |
| <b>H3f3b</b>     | 1.88E-18 | -0.536221486 | 0.971 | 0.986 | 2.66E-14 | T cells, CD4+, naive, stimulated |
| <b>Klf4</b>      | 6.2E-18  | -1.373435805 | 0.197 | 0.484 | 8.78E-14 | T cells, CD4+, naive, stimulated |
| <b>Rps16</b>     | 1.02E-17 | 0.340320804  | 1     | 0.978 | 1.44E-13 | T cells, CD4+, naive, stimulated |
| <b>Gnas</b>      | 1.32E-17 | -0.806029739 | 0.45  | 0.742 | 1.86E-13 | T cells, CD4+, naive, stimulated |
| <b>Hspa5</b>     | 1.56E-17 | -0.838972073 | 0.466 | 0.759 | 2.21E-13 | T cells, CD4+, naive, stimulated |
| <b>Cd74</b>      | 1.83E-17 | 0.317768541  | 1     | 0.999 | 2.59E-13 | T cells, CD4+, naive, stimulated |
| <b>Rps27a</b>    | 1.87E-17 | 0.352702791  | 0.983 | 0.97  | 2.65E-13 | T cells, CD4+, naive, stimulated |
| <b>Scd1</b>      | 2.04E-17 | -1.098873367 | 0.206 | 0.49  | 2.89E-13 | T cells, CD4+, naive, stimulated |
| <b>Rac2</b>      | 2.29E-17 | 0.878245903  | 0.782 | 0.717 | 3.24E-13 | T cells, CD4+, naive, stimulated |
| <b>Hnrnpk</b>    | 3.52E-17 | -0.779322286 | 0.345 | 0.659 | 4.98E-13 | T cells, CD4+, naive, stimulated |
| <b>Cd37</b>      | 5.5E-17  | 0.674275892  | 0.887 | 0.865 | 7.79E-13 | T cells, CD4+, naive, stimulated |
| <b>Oaz1</b>      | 6.4E-17  | 0.673382289  | 0.899 | 0.881 | 9.06E-13 | T cells, CD4+, naive, stimulated |
| <b>Cd55</b>      | 6.96E-17 | -0.691041427 | 0.353 | 0.686 | 9.86E-13 | T cells, CD4+, naive, stimulated |
| <b>Cd83</b>      | 7.4E-17  | -0.877665133 | 0.466 | 0.747 | 1.05E-12 | T cells, CD4+, naive, stimulated |
| <b>Tgfb1</b>     | 1.16E-16 | -0.791344649 | 0.303 | 0.606 | 1.64E-12 | T cells, CD4+, naive, stimulated |
| <b>Ptprc</b>     | 1.21E-16 | -0.876223476 | 0.34  | 0.643 | 1.71E-12 | T cells, CD4+, naive, stimulated |
| <b>Ly6a</b>      | 1.96E-16 | 1.3032395    | 0.517 | 0.327 | 2.78E-12 | T cells, CD4+, naive, stimulated |
| <b>Hsp90aa1</b>  | 2.2E-16  | -0.948206682 | 0.693 | 0.854 | 3.11E-12 | T cells, CD4+, naive, stimulated |
| <b>Tgfb2</b>     | 2.65E-16 | -0.952389263 | 0.143 | 0.41  | 3.75E-12 | T cells, CD4+, naive, stimulated |
| <b>Rps18</b>     | 2.83E-16 | 0.522552808  | 0.937 | 0.929 | 4.01E-12 | T cells, CD4+, naive, stimulated |
| <b>Fau</b>       | 3.12E-16 | 0.376016732  | 1     | 0.988 | 4.42E-12 | T cells, CD4+, naive, stimulated |

|                 |          |              |       |       |          |                                  |
|-----------------|----------|--------------|-------|-------|----------|----------------------------------|
| <b>Ptp4a3</b>   | 5.85E-16 | -0.816722893 | 0.248 | 0.556 | 8.29E-12 | T cells, CD4+, naive, stimulated |
| <b>Gdi2</b>     | 7.01E-16 | -0.760184798 | 0.37  | 0.667 | 9.92E-12 | T cells, CD4+, naive, stimulated |
| <b>Cd9</b>      | 8.9E-16  | 0.477109071  | 0.134 | 0.024 | 1.26E-11 | T cells, CD4+, naive, stimulated |
| <b>Polr2a</b>   | 1.12E-15 | -0.968588893 | 0.202 | 0.47  | 1.58E-11 | T cells, CD4+, naive, stimulated |
| <b>Ppp1r15a</b> | 1.28E-15 | -0.896314805 | 0.324 | 0.602 | 1.81E-11 | T cells, CD4+, naive, stimulated |
| <b>Add3</b>     | 1.75E-15 | -0.750997521 | 0.193 | 0.482 | 2.48E-11 | T cells, CD4+, naive, stimulated |
| <b>Cox4i1</b>   | 2.9E-15  | 0.676605998  | 0.794 | 0.716 | 4.11E-11 | T cells, CD4+, naive, stimulated |
| <b>Csk</b>      | 3.55E-15 | -0.896201634 | 0.206 | 0.476 | 5.03E-11 | T cells, CD4+, naive, stimulated |
| <b>Srgn</b>     | 3.87E-15 | 0.544206938  | 0.95  | 0.93  | 5.48E-11 | T cells, CD4+, naive, stimulated |
| <b>Arhgef1</b>  | 5.11E-15 | -0.807092423 | 0.311 | 0.589 | 7.23E-11 | T cells, CD4+, naive, stimulated |
| <b>Eef1b2</b>   | 1.11E-14 | 0.653450327  | 0.828 | 0.826 | 1.57E-10 | T cells, CD4+, naive, stimulated |
| <b>Tonsl</b>    | 1.75E-14 | -0.997756728 | 0.105 | 0.332 | 2.47E-10 | T cells, CD4+, naive, stimulated |
| <b>Neat1</b>    | 1.95E-14 | -1.048089323 | 0.185 | 0.439 | 2.76E-10 | T cells, CD4+, naive, stimulated |
| <b>Pim1</b>     | 2.13E-14 | -0.969042484 | 0.256 | 0.52  | 3.01E-10 | T cells, CD4+, naive, stimulated |
| <b>Cnn3</b>     | 2.31E-14 | -1.005970535 | 0.067 | 0.297 | 3.27E-10 | T cells, CD4+, naive, stimulated |
| <b>Ass1</b>     | 2.53E-14 | 0.502680741  | 0.151 | 0.034 | 3.58E-10 | T cells, CD4+, naive, stimulated |
| <b>Hnrnp1</b>   | 2.82E-14 | -0.748706974 | 0.202 | 0.469 | 4E-10    | T cells, CD4+, naive, stimulated |
| <b>Actr3</b>    | 2.93E-14 | -0.708034192 | 0.382 | 0.68  | 4.15E-10 | T cells, CD4+, naive, stimulated |
| <b>Uba52</b>    | 3.4E-14  | 0.335229791  | 1     | 0.978 | 4.82E-10 | T cells, CD4+, naive, stimulated |
| <b>Sell</b>     | 3.72E-14 | -0.711667396 | 0.29  | 0.572 | 5.26E-10 | T cells, CD4+, naive, stimulated |
| <b>Rbm38</b>    | 4E-14    | -0.798970269 | 0.235 | 0.505 | 5.67E-10 | T cells, CD4+, naive, stimulated |
| <b>Clk1</b>     | 4.1E-14  | -0.84721449  | 0.248 | 0.519 | 5.81E-10 | T cells, CD4+, naive, stimulated |
| <b>Sqstm1</b>   | 6.5E-14  | -0.706582737 | 0.34  | 0.62  | 9.2E-10  | T cells, CD4+, naive, stimulated |
| <b>Lamp1</b>    | 7.43E-14 | -0.906287541 | 0.139 | 0.379 | 1.05E-09 | T cells, CD4+, naive, stimulated |
| <b>Rplp1</b>    | 8.47E-14 | 0.382646446  | 0.979 | 0.97  | 1.2E-09  | T cells, CD4+, naive, stimulated |
| <b>AW112010</b> | 9.24E-14 | 0.965686755  | 0.223 | 0.077 | 1.31E-09 | T cells, CD4+, naive, stimulated |
| <b>Brd2</b>     | 1.07E-13 | -0.885505361 | 0.256 | 0.511 | 1.52E-09 | T cells, CD4+, naive, stimulated |
| <b>Eif4a1</b>   | 1.13E-13 | -0.722020419 | 0.282 | 0.574 | 1.59E-09 | T cells, CD4+, naive, stimulated |
| <b>Snn</b>      | 1.14E-13 | -0.90324816  | 0.164 | 0.419 | 1.61E-09 | T cells, CD4+, naive, stimulated |
| <b>Sdcbp</b>    | 1.36E-13 | -0.936625657 | 0.13  | 0.367 | 1.93E-09 | T cells, CD4+, naive, stimulated |
| <b>Sf1</b>      | 1.79E-13 | -0.813799777 | 0.261 | 0.524 | 2.54E-09 | T cells, CD4+, naive, stimulated |
| <b>Rhoa</b>     | 2.29E-13 | -0.572785681 | 0.504 | 0.795 | 3.24E-09 | T cells, CD4+, naive, stimulated |
| <b>Ube2d3</b>   | 2.65E-13 | -0.680861393 | 0.403 | 0.68  | 3.75E-09 | T cells, CD4+, naive, stimulated |
| <b>Arf1</b>     | 2.8E-13  | -0.587828676 | 0.277 | 0.551 | 3.96E-09 | T cells, CD4+, naive, stimulated |
| <b>Hnrnpa2b</b> | 3.06E-13 | -0.595829812 | 0.475 | 0.759 | 4.34E-09 | T cells, CD4+, naive, stimulated |

|                 |          |              |       |       |          |                                  |
|-----------------|----------|--------------|-------|-------|----------|----------------------------------|
| <b>Ccdc28b</b>  | 3.6E-13  | 0.481273393  | 0.109 | 0.02  | 5.09E-09 | T cells, CD4+, naive, stimulated |
| <b>Sfpq</b>     | 3.76E-13 | -0.850243884 | 0.21  | 0.449 | 5.32E-09 | T cells, CD4+, naive, stimulated |
| <b>Cyba</b>     | 3.88E-13 | 0.717520711  | 0.79  | 0.751 | 5.49E-09 | T cells, CD4+, naive, stimulated |
| <b>Ptp4a1</b>   | 4.48E-13 | -1.049445321 | 0.059 | 0.26  | 6.35E-09 | T cells, CD4+, naive, stimulated |
| <b>Cfl1</b>     | 4.8E-13  | 0.510636466  | 0.891 | 0.858 | 6.8E-09  | T cells, CD4+, naive, stimulated |
| <b>Psme1</b>    | 5.02E-13 | 0.844887047  | 0.647 | 0.511 | 7.11E-09 | T cells, CD4+, naive, stimulated |
| <b>Lbr</b>      | 5.06E-13 | -0.969321158 | 0.088 | 0.304 | 7.16E-09 | T cells, CD4+, naive, stimulated |
| <b>Ubb</b>      | 5.08E-13 | 0.397380918  | 0.992 | 0.978 | 7.18E-09 | T cells, CD4+, naive, stimulated |
| <b>Tgif1</b>    | 5.1E-13  | -0.846974252 | 0.235 | 0.481 | 7.22E-09 | T cells, CD4+, naive, stimulated |
| <b>Btf3</b>     | 5.89E-13 | 0.582602474  | 0.815 | 0.809 | 8.34E-09 | T cells, CD4+, naive, stimulated |
| <b>Tmsb4x</b>   | 6.3E-13  | 0.397851248  | 0.992 | 0.982 | 8.92E-09 | T cells, CD4+, naive, stimulated |
| <b>Rpl35</b>    | 7.15E-13 | 0.327866318  | 0.992 | 0.965 | 1.01E-08 | T cells, CD4+, naive, stimulated |
| <b>Ppia</b>     | 7.19E-13 | 0.436607384  | 0.971 | 0.971 | 1.02E-08 | T cells, CD4+, naive, stimulated |
| <b>Cd52</b>     | 7.93E-13 | 0.608682467  | 0.941 | 0.898 | 1.12E-08 | T cells, CD4+, naive, stimulated |
| <b>Rps15a</b>   | 7.96E-13 | 0.326138696  | 0.992 | 0.976 | 1.13E-08 | T cells, CD4+, naive, stimulated |
| <b>Foxo1</b>    | 9.7E-13  | -0.898051233 | 0.16  | 0.395 | 1.37E-08 | T cells, CD4+, naive, stimulated |
| <b>S1pr1</b>    | 1.28E-12 | -0.876540916 | 0.273 | 0.524 | 1.81E-08 | T cells, CD4+, naive, stimulated |
| <b>Fam43a</b>   | 1.42E-12 | -0.942169215 | 0.16  | 0.394 | 2.01E-08 | T cells, CD4+, naive, stimulated |
| <b>Rps24</b>    | 1.73E-12 | 0.293267234  | 1     | 0.98  | 2.45E-08 | T cells, CD4+, naive, stimulated |
| <b>Laptm5</b>   | 1.95E-12 | -0.551523287 | 0.504 | 0.783 | 2.76E-08 | T cells, CD4+, naive, stimulated |
| <b>Ly6d</b>     | 1.97E-12 | 0.836486203  | 0.87  | 0.841 | 2.79E-08 | T cells, CD4+, naive, stimulated |
| <b>Cd53</b>     | 2.43E-12 | -0.659375382 | 0.328 | 0.592 | 3.43E-08 | T cells, CD4+, naive, stimulated |
| <b>Rasgef1b</b> | 2.57E-12 | -0.90704627  | 0.126 | 0.355 | 3.64E-08 | T cells, CD4+, naive, stimulated |
| <b>Lyn</b>      | 2.81E-12 | -0.626868233 | 0.328 | 0.591 | 3.97E-08 | T cells, CD4+, naive, stimulated |
| <b>Srsf3</b>    | 3.05E-12 | -0.680460462 | 0.357 | 0.606 | 4.32E-08 | T cells, CD4+, naive, stimulated |
| <b>Hmgn2</b>    | 3.29E-12 | -0.847557315 | 0.256 | 0.497 | 4.66E-08 | T cells, CD4+, naive, stimulated |
| <b>Arhgdib</b>  | 3.4E-12  | 0.489003571  | 0.908 | 0.873 | 4.82E-08 | T cells, CD4+, naive, stimulated |
| <b>Ly6e</b>     | 3.85E-12 | 0.481300722  | 0.983 | 0.98  | 5.45E-08 | T cells, CD4+, naive, stimulated |
| <b>Fosb</b>     | 3.88E-12 | -1.186131791 | 0.189 | 0.41  | 5.5E-08  | T cells, CD4+, naive, stimulated |
| <b>Pfn1</b>     | 4.19E-12 | 0.538865675  | 0.95  | 0.938 | 5.94E-08 | T cells, CD4+, naive, stimulated |
| <b>Pxk</b>      | 4.87E-12 | -0.834098622 | 0.143 | 0.366 | 6.89E-08 | T cells, CD4+, naive, stimulated |
| <b>Eif4a2</b>   | 5.18E-12 | -0.784160774 | 0.256 | 0.497 | 7.34E-08 | T cells, CD4+, naive, stimulated |
| <b>Tob1</b>     | 5.35E-12 | -0.946749197 | 0.101 | 0.299 | 7.57E-08 | T cells, CD4+, naive, stimulated |
| <b>Arpc3</b>    | 5.73E-12 | 0.607465369  | 0.777 | 0.701 | 8.11E-08 | T cells, CD4+, naive, stimulated |
| <b>Akap13</b>   | 5.92E-12 | -0.692276837 | 0.311 | 0.554 | 8.38E-08 | T cells, CD4+, naive, stimulated |

|                |          |              |       |       |          |                                  |
|----------------|----------|--------------|-------|-------|----------|----------------------------------|
| <b>Cpm</b>     | 6.04E-12 | -0.952884328 | 0.08  | 0.291 | 8.54E-08 | T cells, CD4+, naive, stimulated |
| <b>Gga2</b>    | 7.38E-12 | -0.780785736 | 0.092 | 0.306 | 1.04E-07 | T cells, CD4+, naive, stimulated |
| <b>Psmb8</b>   | 7.4E-12  | 0.864291608  | 0.66  | 0.57  | 1.05E-07 | T cells, CD4+, naive, stimulated |
| <b>Rpl41</b>   | 8.82E-12 | 0.516783615  | 0.849 | 0.875 | 1.25E-07 | T cells, CD4+, naive, stimulated |
| <b>Crlf3</b>   | 1.17E-11 | -0.759413236 | 0.193 | 0.42  | 1.65E-07 | T cells, CD4+, naive, stimulated |
| <b>Dmxl1</b>   | 1.28E-11 | -0.927563505 | 0.168 | 0.397 | 1.81E-07 | T cells, CD4+, naive, stimulated |
| <b>Dusp5</b>   | 1.31E-11 | -0.936966683 | 0.202 | 0.432 | 1.86E-07 | T cells, CD4+, naive, stimulated |
| <b>Btg2</b>    | 1.37E-11 | -0.730707997 | 0.487 | 0.7   | 1.93E-07 | T cells, CD4+, naive, stimulated |
| <b>Fus</b>     | 1.69E-11 | -0.678967869 | 0.277 | 0.516 | 2.39E-07 | T cells, CD4+, naive, stimulated |
| <b>Cyth1</b>   | 2.13E-11 | -0.798717265 | 0.197 | 0.423 | 3.02E-07 | T cells, CD4+, naive, stimulated |
| <b>Zfp36l1</b> | 2.28E-11 | -0.538947657 | 0.639 | 0.835 | 3.23E-07 | T cells, CD4+, naive, stimulated |
| <b>Pcbp1</b>   | 2.74E-11 | -0.611272433 | 0.395 | 0.64  | 3.88E-07 | T cells, CD4+, naive, stimulated |
| <b>Eif2ak3</b> | 3.36E-11 | -0.850052076 | 0.105 | 0.315 | 4.76E-07 | T cells, CD4+, naive, stimulated |
| <b>Rpl22</b>   | 3.76E-11 | 0.357191723  | 0.962 | 0.952 | 5.32E-07 | T cells, CD4+, naive, stimulated |
| <b>Capg</b>    | 3.77E-11 | 0.82869496   | 0.534 | 0.382 | 5.34E-07 | T cells, CD4+, naive, stimulated |
| <b>Nme2</b>    | 3.9E-11  | 0.804208982  | 0.664 | 0.592 | 5.53E-07 | T cells, CD4+, naive, stimulated |
| <b>Prkcb</b>   | 4.12E-11 | -0.673535719 | 0.256 | 0.491 | 5.83E-07 | T cells, CD4+, naive, stimulated |
| <b>Gpr171</b>  | 4.23E-11 | -0.973594531 | 0.16  | 0.377 | 5.99E-07 | T cells, CD4+, naive, stimulated |
| <b>Eif3f</b>   | 4.24E-11 | 0.596888883  | 0.845 | 0.854 | 6.01E-07 | T cells, CD4+, naive, stimulated |
| <b>Erp29</b>   | 4.99E-11 | 0.690227768  | 0.584 | 0.444 | 7.06E-07 | T cells, CD4+, naive, stimulated |
| <b>Foxp1</b>   | 5.23E-11 | -0.545735368 | 0.521 | 0.785 | 7.41E-07 | T cells, CD4+, naive, stimulated |
| <b>Sh3bp5</b>  | 6.27E-11 | -0.779315786 | 0.164 | 0.379 | 8.88E-07 | T cells, CD4+, naive, stimulated |
| <b>Cebpb</b>   | 6.39E-11 | -0.877687428 | 0.265 | 0.491 | 9.04E-07 | T cells, CD4+, naive, stimulated |
| <b>Kctd12</b>  | 6.62E-11 | -0.889591242 | 0.105 | 0.301 | 9.37E-07 | T cells, CD4+, naive, stimulated |
| <b>Tsc22d1</b> | 7.44E-11 | -1.147605875 | 0.092 | 0.299 | 1.05E-06 | T cells, CD4+, naive, stimulated |
| <b>Khdrbs1</b> | 7.55E-11 | -0.776247568 | 0.13  | 0.334 | 1.07E-06 | T cells, CD4+, naive, stimulated |
| <b>Gm8797</b>  | 7.62E-11 | 0.929835116  | 0.387 | 0.217 | 1.08E-06 | T cells, CD4+, naive, stimulated |
| <b>Ppp1cc</b>  | 1.02E-10 | -0.653481009 | 0.193 | 0.402 | 1.44E-06 | T cells, CD4+, naive, stimulated |
| <b>Timm8a1</b> | 1.11E-10 | 0.710677943  | 0.122 | 0.031 | 1.58E-06 | T cells, CD4+, naive, stimulated |
| <b>Rnf187</b>  | 1.13E-10 | -0.785377895 | 0.176 | 0.379 | 1.6E-06  | T cells, CD4+, naive, stimulated |
| <b>Cd24a</b>   | 1.18E-10 | -0.720342259 | 0.37  | 0.614 | 1.67E-06 | T cells, CD4+, naive, stimulated |
| <b>Elmsan1</b> | 1.18E-10 | -0.990125611 | 0.13  | 0.319 | 1.67E-06 | T cells, CD4+, naive, stimulated |
| <b>Mzb1</b>    | 1.36E-10 | 0.894223929  | 0.571 | 0.476 | 1.92E-06 | T cells, CD4+, naive, stimulated |
| <b>Fam49b</b>  | 1.39E-10 | -0.735813989 | 0.231 | 0.442 | 1.96E-06 | T cells, CD4+, naive, stimulated |
| <b>Hnrnpab</b> | 1.43E-10 | -0.661668349 | 0.298 | 0.535 | 2.03E-06 | T cells, CD4+, naive, stimulated |

|                |          |              |       |       |          |                                  |
|----------------|----------|--------------|-------|-------|----------|----------------------------------|
| <b>H2-T23</b>  | 1.57E-10 | -0.692962282 | 0.277 | 0.516 | 2.22E-06 | T cells, CD4+, naive, stimulated |
| <b>Jun</b>     | 1.81E-10 | -0.962637266 | 0.307 | 0.533 | 2.56E-06 | T cells, CD4+, naive, stimulated |
| <b>Man1a</b>   | 1.85E-10 | -0.885227804 | 0.176 | 0.363 | 2.61E-06 | T cells, CD4+, naive, stimulated |
| <b>Cxcr5</b>   | 2.16E-10 | -0.850591872 | 0.185 | 0.383 | 3.06E-06 | T cells, CD4+, naive, stimulated |
| <b>B2m</b>     | 2.34E-10 | 0.393322084  | 0.899 | 0.913 | 3.31E-06 | T cells, CD4+, naive, stimulated |
| <b>Wsb1</b>    | 2.52E-10 | -0.811799002 | 0.126 | 0.317 | 3.57E-06 | T cells, CD4+, naive, stimulated |
| <b>Lcp1</b>    | 3.53E-10 | -0.594360515 | 0.399 | 0.642 | 5E-06    | T cells, CD4+, naive, stimulated |
| <b>Rps14</b>   | 3.89E-10 | 0.358192211  | 0.945 | 0.961 | 5.5E-06  | T cells, CD4+, naive, stimulated |
| <b>Slbp</b>    | 4.56E-10 | -0.745852892 | 0.172 | 0.371 | 6.45E-06 | T cells, CD4+, naive, stimulated |
| <b>Bank1</b>   | 4.9E-10  | -0.540008663 | 0.353 | 0.603 | 6.94E-06 | T cells, CD4+, naive, stimulated |
| <b>Rnf145</b>  | 5.1E-10  | -0.803596504 | 0.076 | 0.252 | 7.22E-06 | T cells, CD4+, naive, stimulated |
| <b>Stk24</b>   | 5.13E-10 | -0.633393943 | 0.261 | 0.484 | 7.27E-06 | T cells, CD4+, naive, stimulated |
| <b>Serf2</b>   | 5.25E-10 | 0.504259949  | 0.84  | 0.841 | 7.43E-06 | T cells, CD4+, naive, stimulated |
| <b>Gm26532</b> | 5.68E-10 | -0.902892762 | 0.13  | 0.325 | 8.04E-06 | T cells, CD4+, naive, stimulated |
| <b>Capza1</b>  | 6.53E-10 | -0.679387213 | 0.164 | 0.359 | 9.25E-06 | T cells, CD4+, naive, stimulated |
| <b>Rpl7</b>    | 7.35E-10 | 0.355772156  | 0.937 | 0.936 | 1.04E-05 | T cells, CD4+, naive, stimulated |
| <b>Nrros</b>   | 7.62E-10 | -0.889928206 | 0.185 | 0.374 | 1.08E-05 | T cells, CD4+, naive, stimulated |
| <b>Fmnl1</b>   | 7.96E-10 | -0.732278599 | 0.176 | 0.371 | 1.13E-05 | T cells, CD4+, naive, stimulated |
| <b>Tmed2</b>   | 8.57E-10 | -0.63115109  | 0.244 | 0.461 | 1.21E-05 | T cells, CD4+, naive, stimulated |
| <b>Taf6l</b>   | 8.82E-10 | -0.851304339 | 0.092 | 0.264 | 1.25E-05 | T cells, CD4+, naive, stimulated |
| <b>Emb</b>     | 9.01E-10 | 0.464380989  | 0.101 | 0.023 | 1.28E-05 | T cells, CD4+, naive, stimulated |
| <b>Rpl30</b>   | 9.89E-10 | 0.282487123  | 0.996 | 0.978 | 1.4E-05  | T cells, CD4+, naive, stimulated |
| <b>Tnfaip3</b> | 1.12E-09 | -1.046040132 | 0.143 | 0.322 | 1.58E-05 | T cells, CD4+, naive, stimulated |
| <b>Calm1</b>   | 1.13E-09 | 0.545598802  | 0.845 | 0.839 | 1.61E-05 | T cells, CD4+, naive, stimulated |
| <b>Adgre5</b>  | 1.15E-09 | -0.631970805 | 0.303 | 0.533 | 1.62E-05 | T cells, CD4+, naive, stimulated |
| <b>Ptms</b>    | 1.22E-09 | 0.491253999  | 0.155 | 0.051 | 1.73E-05 | T cells, CD4+, naive, stimulated |
| <b>Myh9</b>    | 1.4E-09  | -0.55075197  | 0.34  | 0.565 | 1.99E-05 | T cells, CD4+, naive, stimulated |
| <b>Kdm6b</b>   | 1.52E-09 | -0.873046176 | 0.16  | 0.341 | 2.15E-05 | T cells, CD4+, naive, stimulated |
| <b>Npc2</b>    | 1.71E-09 | 0.780712004  | 0.42  | 0.261 | 2.42E-05 | T cells, CD4+, naive, stimulated |
| <b>Matr3</b>   | 1.77E-09 | -0.653658386 | 0.181 | 0.384 | 2.5E-05  | T cells, CD4+, naive, stimulated |
| <b>Rpl7a</b>   | 1.8E-09  | 0.431920131  | 0.866 | 0.899 | 2.54E-05 | T cells, CD4+, naive, stimulated |
| <b>Gm10076</b> | 1.8E-09  | 0.254080506  | 0.987 | 0.978 | 2.55E-05 | T cells, CD4+, naive, stimulated |
| <b>Pou2af1</b> | 2.04E-09 | -0.669673827 | 0.172 | 0.375 | 2.88E-05 | T cells, CD4+, naive, stimulated |
| <b>Peli1</b>   | 2.12E-09 | -0.707719795 | 0.147 | 0.337 | 2.99E-05 | T cells, CD4+, naive, stimulated |
| <b>Rsrp1</b>   | 2.13E-09 | -0.716766408 | 0.197 | 0.397 | 3.01E-05 | T cells, CD4+, naive, stimulated |

|                  |          |              |       |       |            |                                  |
|------------------|----------|--------------|-------|-------|------------|----------------------------------|
| <b>Pmaip1</b>    | 2.16E-09 | -0.915406465 | 0.097 | 0.271 | 3.06E-05   | T cells, CD4+, naive, stimulated |
| <b>Rps19</b>     | 2.53E-09 | 0.306372103  | 0.987 | 0.968 | 3.59E-05   | T cells, CD4+, naive, stimulated |
| <b>Il2rg</b>     | 2.66E-09 | -0.439558186 | 0.546 | 0.767 | 3.76E-05   | T cells, CD4+, naive, stimulated |
| <b>Ctnnb1</b>    | 2.73E-09 | -0.83078489  | 0.105 | 0.282 | 3.86E-05   | T cells, CD4+, naive, stimulated |
| <b>Brwd1</b>     | 2.76E-09 | -0.763533831 | 0.067 | 0.239 | 3.9E-05    | T cells, CD4+, naive, stimulated |
| <b>Cbx4</b>      | 2.84E-09 | -0.734429704 | 0.067 | 0.235 | 4.01E-05   | T cells, CD4+, naive, stimulated |
| <b>Mcl1</b>      | 3.35E-09 | -0.650420338 | 0.294 | 0.504 | 4.75E-05   | T cells, CD4+, naive, stimulated |
| <b>Herpud1</b>   | 3.38E-09 | -0.863374118 | 0.151 | 0.329 | 4.78E-05   | T cells, CD4+, naive, stimulated |
| <b>Oser1</b>     | 3.6E-09  | -0.740662257 | 0.143 | 0.316 | 5.1E-05    | T cells, CD4+, naive, stimulated |
| <b>Snx9</b>      | 3.7E-09  | -0.684716165 | 0.193 | 0.384 | 5.24E-05   | T cells, CD4+, naive, stimulated |
| <b>Sh3bgrl3</b>  | 3.78E-09 | 0.444220562  | 0.836 | 0.836 | 5.35E-05   | T cells, CD4+, naive, stimulated |
| <b>Polr2m</b>    | 3.86E-09 | -0.7125748   | 0.067 | 0.234 | 5.47E-05   | T cells, CD4+, naive, stimulated |
| <b>Fchsd2</b>    | 4.42E-09 | -0.641405379 | 0.164 | 0.37  | 6.25E-05   | T cells, CD4+, naive, stimulated |
| <b>Sat1</b>      | 4.43E-09 | 0.725280179  | 0.508 | 0.358 | 6.27E-05   | T cells, CD4+, naive, stimulated |
| <b>Calr</b>      | 4.97E-09 | -0.672364422 | 0.206 | 0.407 | 7.04E-05   | T cells, CD4+, naive, stimulated |
| <b>Hnrnph2</b>   | 5.26E-09 | -0.732756628 | 0.113 | 0.288 | 7.45E-05   | T cells, CD4+, naive, stimulated |
| <b>Ptk2b</b>     | 5.35E-09 | -0.703493467 | 0.134 | 0.31  | 7.58E-05   | T cells, CD4+, naive, stimulated |
| <b>Srek1</b>     | 6.44E-09 | 0.570867148  | 0.134 | 0.043 | 9.11E-05   | T cells, CD4+, naive, stimulated |
| <b>Tpm4</b>      | 6.56E-09 | -0.697041198 | 0.214 | 0.396 | 9.28E-05   | T cells, CD4+, naive, stimulated |
| <b>C13002612</b> | 6.6E-09  | 0.515959934  | 0.122 | 0.036 | 9.35E-05   | T cells, CD4+, naive, stimulated |
| <b>Zfp318</b>    | 6.74E-09 | -0.569825642 | 0.071 | 0.248 | 9.54E-05   | T cells, CD4+, naive, stimulated |
| <b>Trim25</b>    | 6.91E-09 | -0.546404956 | 0.189 | 0.398 | 9.79E-05   | T cells, CD4+, naive, stimulated |
| <b>Sec61b</b>    | 7.26E-09 | 0.667413161  | 0.592 | 0.479 | 0.0001027  | T cells, CD4+, naive, stimulated |
| <b>Rpl17</b>     | 7.44E-09 | -0.275821737 | 0.95  | 0.962 | 0.00010527 | T cells, CD4+, naive, stimulated |
| <b>Trp53i11</b>  | 7.47E-09 | -0.650806321 | 0.155 | 0.346 | 0.0001057  | T cells, CD4+, naive, stimulated |
| <b>Rassf4</b>    | 7.62E-09 | 0.487873472  | 0.172 | 0.062 | 0.00010782 | T cells, CD4+, naive, stimulated |
| <b>Lmo2</b>      | 8.61E-09 | -0.740375277 | 0.055 | 0.209 | 0.00012185 | T cells, CD4+, naive, stimulated |
| <b>Prrc2a</b>    | 9.12E-09 | -0.694597397 | 0.126 | 0.301 | 0.00012906 | T cells, CD4+, naive, stimulated |
| <b>Ncf2</b>      | 1.02E-08 | -0.633257296 | 0.147 | 0.324 | 0.00014398 | T cells, CD4+, naive, stimulated |
| <b>Tmem123</b>   | 1.04E-08 | -0.585561791 | 0.239 | 0.45  | 0.00014787 | T cells, CD4+, naive, stimulated |
| <b>Ptbp3</b>     | 1.17E-08 | -0.586757664 | 0.307 | 0.499 | 0.00016506 | T cells, CD4+, naive, stimulated |
| <b>Prdx1</b>     | 1.17E-08 | 0.768234147  | 0.576 | 0.474 | 0.00016538 | T cells, CD4+, naive, stimulated |
| <b>Prr13</b>     | 1.17E-08 | 0.811611529  | 0.471 | 0.323 | 0.00016625 | T cells, CD4+, naive, stimulated |
| <b>B4galnt1</b>  | 1.19E-08 | -0.634515512 | 0.214 | 0.404 | 0.00016894 | T cells, CD4+, naive, stimulated |
| <b>Mknk2</b>     | 1.21E-08 | -0.712836973 | 0.134 | 0.301 | 0.00017152 | T cells, CD4+, naive, stimulated |

|                  |          |              |       |       |            |                                  |
|------------------|----------|--------------|-------|-------|------------|----------------------------------|
| <b>Irf4</b>      | 1.22E-08 | -0.575063486 | 0.143 | 0.33  | 0.00017203 | T cells, CD4+, naive, stimulated |
| <b>Hist1h2ap</b> | 1.23E-08 | -0.788328074 | 0.143 | 0.317 | 0.00017464 | T cells, CD4+, naive, stimulated |
| <b>Rpl34</b>     | 1.32E-08 | 0.250633863  | 0.992 | 0.972 | 0.00018717 | T cells, CD4+, naive, stimulated |
| <b>Nfatc3</b>    | 1.37E-08 | -0.754826864 | 0.168 | 0.345 | 0.00019333 | T cells, CD4+, naive, stimulated |
| <b>Mef2d</b>     | 1.43E-08 | -0.767840229 | 0.143 | 0.304 | 0.00020307 | T cells, CD4+, naive, stimulated |
| <b>Ywhaq</b>     | 1.54E-08 | -0.581056901 | 0.202 | 0.391 | 0.00021766 | T cells, CD4+, naive, stimulated |
| <b>Evi2a</b>     | 1.55E-08 | 0.317947436  | 0.134 | 0.043 | 0.00021959 | T cells, CD4+, naive, stimulated |
| <b>Msn</b>       | 1.56E-08 | -0.391167332 | 0.462 | 0.696 | 0.00022099 | T cells, CD4+, naive, stimulated |
| <b>Srsf2</b>     | 1.62E-08 | -0.568593419 | 0.324 | 0.526 | 0.00022889 | T cells, CD4+, naive, stimulated |
| <b>Psme2</b>     | 1.65E-08 | 0.78904159   | 0.454 | 0.311 | 0.00023378 | T cells, CD4+, naive, stimulated |
| <b>Eif4g2</b>    | 1.67E-08 | -0.43784648  | 0.374 | 0.601 | 0.00023579 | T cells, CD4+, naive, stimulated |
| <b>Ndufb11</b>   | 1.76E-08 | 0.640192311  | 0.563 | 0.427 | 0.00024917 | T cells, CD4+, naive, stimulated |
| <b>Csnk2b</b>    | 1.89E-08 | 0.732358635  | 0.387 | 0.242 | 0.00026797 | T cells, CD4+, naive, stimulated |
| <b>Irs2</b>      | 1.9E-08  | -0.803160441 | 0.118 | 0.283 | 0.00026942 | T cells, CD4+, naive, stimulated |
| <b>Amd1</b>      | 1.95E-08 | -0.713241801 | 0.084 | 0.24  | 0.00027657 | T cells, CD4+, naive, stimulated |
| <b>Dnaja1</b>    | 2E-08    | -0.540930346 | 0.592 | 0.762 | 0.00028377 | T cells, CD4+, naive, stimulated |
| <b>Tpt1</b>      | 2.04E-08 | 0.267039194  | 1     | 0.97  | 0.00028829 | T cells, CD4+, naive, stimulated |
| <b>Atf4</b>      | 2.1E-08  | -0.578199792 | 0.277 | 0.475 | 0.00029689 | T cells, CD4+, naive, stimulated |
| <b>Tob2</b>      | 2.1E-08  | -0.728259832 | 0.197 | 0.378 | 0.00029757 | T cells, CD4+, naive, stimulated |
| <b>Lgals3</b>    | 2.12E-08 | 0.470272729  | 0.122 | 0.037 | 0.00030027 | T cells, CD4+, naive, stimulated |
| <b>Ivns1abp</b>  | 2.15E-08 | -0.747495569 | 0.08  | 0.232 | 0.00030509 | T cells, CD4+, naive, stimulated |
| <b>Hnrnpl</b>    | 2.26E-08 | -0.60249463  | 0.269 | 0.462 | 0.00031966 | T cells, CD4+, naive, stimulated |
| <b>Tagap</b>     | 2.58E-08 | -0.830677414 | 0.092 | 0.244 | 0.00036570 | T cells, CD4+, naive, stimulated |
| <b>Wipf1</b>     | 2.77E-08 | -0.521738923 | 0.071 | 0.231 | 0.00039218 | T cells, CD4+, naive, stimulated |
| <b>Blk</b>       | 3E-08    | -0.521397489 | 0.307 | 0.521 | 0.00042440 | T cells, CD4+, naive, stimulated |
| <b>Mrfap1</b>    | 3.4E-08  | -0.66053052  | 0.223 | 0.39  | 0.00048079 | T cells, CD4+, naive, stimulated |
| <b>Abhd17b</b>   | 3.54E-08 | -0.570813545 | 0.214 | 0.393 | 0.00050129 | T cells, CD4+, naive, stimulated |
| <b>Mat2a</b>     | 3.67E-08 | -0.640751792 | 0.244 | 0.422 | 0.00051958 | T cells, CD4+, naive, stimulated |
| <b>Cd164</b>     | 3.76E-08 | -0.689958106 | 0.134 | 0.295 | 0.00053227 | T cells, CD4+, naive, stimulated |
| <b>Unc93b1</b>   | 3.93E-08 | -0.502268249 | 0.416 | 0.627 | 0.00055596 | T cells, CD4+, naive, stimulated |
| <b>Gpr132</b>    | 4.37E-08 | -0.756691474 | 0.147 | 0.317 | 0.00061889 | T cells, CD4+, naive, stimulated |
| <b>Gpr137b</b>   | 4.68E-08 | 0.406358401  | 0.134 | 0.044 | 0.00066248 | T cells, CD4+, naive, stimulated |
| <b>Psmb9</b>     | 4.87E-08 | 0.922631179  | 0.366 | 0.227 | 0.00068979 | T cells, CD4+, naive, stimulated |
| <b>Tiparp</b>    | 5.21E-08 | -0.811792906 | 0.105 | 0.258 | 0.00073697 | T cells, CD4+, naive, stimulated |
| <b>Nrbp1</b>     | 5.4E-08  | -0.663589739 | 0.151 | 0.31  | 0.00076402 | T cells, CD4+, naive, stimulated |



|                 |          |              |       |       |            |                                  |
|-----------------|----------|--------------|-------|-------|------------|----------------------------------|
| <b>Npm1</b>     | 5.4E-08  | 0.540716274  | 0.718 | 0.717 | 0.00076470 | T cells, CD4+, naive, stimulated |
| <b>Fos</b>      | 5.73E-08 | -0.770555192 | 0.479 | 0.635 | 0.00081085 | T cells, CD4+, naive, stimulated |
| <b>Il16</b>     | 5.88E-08 | -0.659463046 | 0.067 | 0.213 | 0.00083197 | T cells, CD4+, naive, stimulated |
| <b>Mef2c</b>    | 6.27E-08 | -0.436894126 | 0.517 | 0.728 | 0.00088806 | T cells, CD4+, naive, stimulated |
| <b>Morf4l2</b>  | 6.61E-08 | -0.677839368 | 0.084 | 0.232 | 0.00093586 | T cells, CD4+, naive, stimulated |
| <b>Ptpcrap</b>  | 6.85E-08 | 0.614354323  | 0.668 | 0.61  | 0.00096927 | T cells, CD4+, naive, stimulated |
| <b>Napsa</b>    | 6.99E-08 | 0.732851589  | 0.63  | 0.566 | 0.00098965 | T cells, CD4+, naive, stimulated |
| <b>Gem</b>      | 7.01E-08 | -0.678313996 | 0.214 | 0.394 | 0.00099270 | T cells, CD4+, naive, stimulated |
| <b>Dnajb6</b>   | 7.84E-08 | -0.671091757 | 0.181 | 0.354 | 0.00110920 | T cells, CD4+, naive, stimulated |
| <b>Ppp3ca</b>   | 7.9E-08  | -0.564253539 | 0.261 | 0.456 | 0.00111767 | T cells, CD4+, naive, stimulated |
| <b>Iqgap1</b>   | 8.42E-08 | -0.494951251 | 0.345 | 0.551 | 0.00119185 | T cells, CD4+, naive, stimulated |
| <b>Ehd1</b>     | 8.53E-08 | -0.748102624 | 0.109 | 0.262 | 0.00120776 | T cells, CD4+, naive, stimulated |
| <b>Mfap1b</b>   | 9.49E-08 | -0.581286641 | 0.092 | 0.25  | 0.00134355 | T cells, CD4+, naive, stimulated |
| <b>Rnasek</b>   | 1.11E-07 | 0.721798071  | 0.345 | 0.205 | 0.00157627 | T cells, CD4+, naive, stimulated |
| <b>Azin1</b>    | 1.13E-07 | -0.626635057 | 0.088 | 0.238 | 0.00160037 | T cells, CD4+, naive, stimulated |
| <b>Phip</b>     | 1.2E-07  | -0.588849876 | 0.139 | 0.308 | 0.00169883 | T cells, CD4+, naive, stimulated |
| <b>Atp5g2</b>   | 1.2E-07  | 0.498692301  | 0.697 | 0.68  | 0.00170407 | T cells, CD4+, naive, stimulated |
| <b>Rpl4</b>     | 1.26E-07 | -0.39763893  | 0.676 | 0.852 | 0.00178020 | T cells, CD4+, naive, stimulated |
| <b>Ubqln1</b>   | 1.3E-07  | -0.601812022 | 0.092 | 0.244 | 0.00184087 | T cells, CD4+, naive, stimulated |
| <b>Oat</b>      | 1.31E-07 | -0.506229494 | 0.097 | 0.247 | 0.00185705 | T cells, CD4+, naive, stimulated |
| <b>Hint1</b>    | 1.35E-07 | 0.633901657  | 0.563 | 0.474 | 0.00190693 | T cells, CD4+, naive, stimulated |
| <b>Ier2</b>     | 1.36E-07 | -0.45874334  | 0.651 | 0.82  | 0.00192038 | T cells, CD4+, naive, stimulated |
| <b>Tm9sf2</b>   | 1.38E-07 | -0.768490456 | 0.08  | 0.216 | 0.00194743 | T cells, CD4+, naive, stimulated |
| <b>Inpp5d</b>   | 1.4E-07  | -0.507782147 | 0.261 | 0.46  | 0.00198767 | T cells, CD4+, naive, stimulated |
| <b>Cerk</b>     | 1.42E-07 | -0.451145456 | 0.256 | 0.449 | 0.00200827 | T cells, CD4+, naive, stimulated |
| <b>Atp5b</b>    | 1.43E-07 | -0.446108641 | 0.324 | 0.516 | 0.00202877 | T cells, CD4+, naive, stimulated |
| <b>Cd22</b>     | 1.51E-07 | -0.494456182 | 0.151 | 0.321 | 0.00214165 | T cells, CD4+, naive, stimulated |
| <b>Eif3i</b>    | 1.57E-07 | 0.668943103  | 0.496 | 0.369 | 0.00221662 | T cells, CD4+, naive, stimulated |
| <b>Rpl5</b>     | 1.6E-07  | 0.460211519  | 0.849 | 0.85  | 0.00227065 | T cells, CD4+, naive, stimulated |
| <b>Pafah1b3</b> | 1.61E-07 | 0.581115354  | 0.282 | 0.145 | 0.00227350 | T cells, CD4+, naive, stimulated |
| <b>Arid5a</b>   | 1.61E-07 | -0.61093519  | 0.189 | 0.352 | 0.00227720 | T cells, CD4+, naive, stimulated |
| <b>Ssh2</b>     | 1.62E-07 | -0.633941928 | 0.155 | 0.331 | 0.00229695 | T cells, CD4+, naive, stimulated |
| <b>Neur13</b>   | 1.64E-07 | -0.487856742 | 0.113 | 0.285 | 0.00232035 | T cells, CD4+, naive, stimulated |
| <b>Nfkb2</b>    | 1.69E-07 | -0.632139183 | 0.105 | 0.253 | 0.00238655 | T cells, CD4+, naive, stimulated |
| <b>Sik1</b>     | 1.88E-07 | -0.611916437 | 0.21  | 0.374 | 0.00265485 | T cells, CD4+, naive, stimulated |

|                  |          |              |       |       |            |                                  |
|------------------|----------|--------------|-------|-------|------------|----------------------------------|
| <b>Rpl3</b>      | 1.93E-07 | 0.3067768    | 0.945 | 0.948 | 0.00272765 | T cells, CD4+, naive, stimulated |
| <b>Sdhc</b>      | 1.99E-07 | 0.481382042  | 0.134 | 0.049 | 0.00282071 | T cells, CD4+, naive, stimulated |
| <b>Cat</b>       | 2E-07    | -0.581011141 | 0.08  | 0.222 | 0.00283284 | T cells, CD4+, naive, stimulated |
| <b>Sesn3</b>     | 2E-07    | -0.538974388 | 0.067 | 0.211 | 0.00283326 | T cells, CD4+, naive, stimulated |
| <b>Smdt1</b>     | 2.01E-07 | 0.688880954  | 0.399 | 0.261 | 0.00284797 | T cells, CD4+, naive, stimulated |
| <b>Trp53inp2</b> | 2.16E-07 | -0.71117798  | 0.084 | 0.223 | 0.00305331 | T cells, CD4+, naive, stimulated |
| <b>Traf4</b>     | 2.17E-07 | -0.623475173 | 0.109 | 0.258 | 0.00307831 | T cells, CD4+, naive, stimulated |
| <b>Adipor1</b>   | 2.22E-07 | -0.471153096 | 0.164 | 0.328 | 0.00314845 | T cells, CD4+, naive, stimulated |
| <b>Pax5</b>      | 2.24E-07 | -0.603292407 | 0.176 | 0.346 | 0.00317038 | T cells, CD4+, naive, stimulated |
| <b>Rnf167</b>    | 2.3E-07  | -0.625408198 | 0.122 | 0.274 | 0.00325794 | T cells, CD4+, naive, stimulated |
| <b>Bcl2a1b</b>   | 2.46E-07 | 0.76818499   | 0.218 | 0.107 | 0.00348837 | T cells, CD4+, naive, stimulated |
| <b>Hvcn1</b>     | 2.48E-07 | -0.493591801 | 0.193 | 0.371 | 0.00351347 | T cells, CD4+, naive, stimulated |
| <b>Txndc16</b>   | 2.58E-07 | -0.620674009 | 0.084 | 0.231 | 0.00365772 | T cells, CD4+, naive, stimulated |
| <b>Map2k1</b>    | 2.62E-07 | -0.573279973 | 0.101 | 0.245 | 0.00371367 | T cells, CD4+, naive, stimulated |
| <b>Ago2</b>      | 2.71E-07 | -0.519817893 | 0.088 | 0.235 | 0.00384121 | T cells, CD4+, naive, stimulated |
| <b>Stip1</b>     | 2.83E-07 | -0.568082257 | 0.151 | 0.315 | 0.00400875 | T cells, CD4+, naive, stimulated |
| <b>Cacybp</b>    | 2.86E-07 | -0.574963246 | 0.223 | 0.4   | 0.00404472 | T cells, CD4+, naive, stimulated |
| <b>Tram1</b>     | 2.87E-07 | -0.624273449 | 0.109 | 0.257 | 0.00405683 | T cells, CD4+, naive, stimulated |
| <b>Nxf1</b>      | 2.98E-07 | -0.671890176 | 0.109 | 0.251 | 0.00421500 | T cells, CD4+, naive, stimulated |
| <b>AI467606</b>  | 3.11E-07 | -0.66292959  | 0.076 | 0.215 | 0.00439885 | T cells, CD4+, naive, stimulated |
| <b>Ralgps2</b>   | 3.27E-07 | -0.460127329 | 0.349 | 0.556 | 0.00463005 | T cells, CD4+, naive, stimulated |
| <b>Plaur</b>     | 3.4E-07  | -0.787392558 | 0.239 | 0.407 | 0.00480744 | T cells, CD4+, naive, stimulated |
| <b>Tra2b</b>     | 3.46E-07 | -0.487113787 | 0.378 | 0.547 | 0.00490165 | T cells, CD4+, naive, stimulated |
| <b>Rps6</b>      | 3.57E-07 | 0.382796276  | 0.857 | 0.858 | 0.00505120 | T cells, CD4+, naive, stimulated |
| <b>Prkcd</b>     | 3.65E-07 | -0.654060656 | 0.13  | 0.278 | 0.00516448 | T cells, CD4+, naive, stimulated |
| <b>Atp5c1</b>    | 4.06E-07 | 0.59439396   | 0.542 | 0.428 | 0.00574787 | T cells, CD4+, naive, stimulated |
| <b>St6gal1</b>   | 4.15E-07 | -0.528113998 | 0.143 | 0.301 | 0.00587047 | T cells, CD4+, naive, stimulated |
| <b>B3gnt5</b>    | 4.17E-07 | -0.646583836 | 0.181 | 0.341 | 0.00590705 | T cells, CD4+, naive, stimulated |
| <b>Rbm7</b>      | 4.44E-07 | -0.585340148 | 0.088 | 0.223 | 0.00628626 | T cells, CD4+, naive, stimulated |
| <b>Stt3b</b>     | 4.47E-07 | -0.660305622 | 0.206 | 0.364 | 0.00633246 | T cells, CD4+, naive, stimulated |
| <b>Lrrk2</b>     | 4.48E-07 | -0.547662574 | 0.063 | 0.202 | 0.00633885 | T cells, CD4+, naive, stimulated |
| <b>Rassf3</b>    | 4.6E-07  | -0.648917825 | 0.038 | 0.156 | 0.00650503 | T cells, CD4+, naive, stimulated |
| <b>Hspd1</b>     | 4.86E-07 | -0.706157243 | 0.412 | 0.573 | 0.00687514 | T cells, CD4+, naive, stimulated |
| <b>Sipa1</b>     | 5.1E-07  | -0.575815236 | 0.139 | 0.295 | 0.00721997 | T cells, CD4+, naive, stimulated |
| <b>G3bp1</b>     | 5.14E-07 | -0.667327244 | 0.134 | 0.274 | 0.00728173 | T cells, CD4+, naive, stimulated |

|                |          |              |       |       |            |                                  |
|----------------|----------|--------------|-------|-------|------------|----------------------------------|
| <b>Adrb2</b>   | 5.15E-07 | -0.647442758 | 0.109 | 0.253 | 0.00729314 | T cells, CD4+, naive, stimulated |
| <b>Usp38</b>   | 5.16E-07 | -0.535277119 | 0.05  | 0.176 | 0.00730172 | T cells, CD4+, naive, stimulated |
| <b>Siah2</b>   | 5.17E-07 | -0.61458342  | 0.092 | 0.226 | 0.00732454 | T cells, CD4+, naive, stimulated |
| <b>Tspan13</b> | 5.4E-07  | -0.519614076 | 0.294 | 0.457 | 0.00764767 | T cells, CD4+, naive, stimulated |
| <b>Gtf3c6</b>  | 5.55E-07 | 0.519206535  | 0.176 | 0.077 | 0.00785840 | T cells, CD4+, naive, stimulated |
| <b>Fli1</b>    | 5.79E-07 | -0.502379748 | 0.176 | 0.344 | 0.0082027  | T cells, CD4+, naive, stimulated |
| <b>Macf1</b>   | 6.22E-07 | -0.465308319 | 0.311 | 0.489 | 0.00880623 | T cells, CD4+, naive, stimulated |
| <b>Zc3hav1</b> | 6.31E-07 | -0.623550627 | 0.126 | 0.272 | 0.00893223 | T cells, CD4+, naive, stimulated |
| <b>Per1</b>    | 6.45E-07 | -0.57506831  | 0.172 | 0.328 | 0.0091295  | T cells, CD4+, naive, stimulated |
| <b>Rel</b>     | 6.5E-07  | -0.440891457 | 0.538 | 0.698 | 0.00920720 | T cells, CD4+, naive, stimulated |
| <b>Esyt1</b>   | 6.96E-07 | -0.585887013 | 0.105 | 0.241 | 0.00985928 | T cells, CD4+, naive, stimulated |
| <b>Mdh1</b>    | 7.12E-07 | 0.620982613  | 0.424 | 0.295 | 0.01008372 | T cells, CD4+, naive, stimulated |
| <b>Atp5f1</b>  | 7.65E-07 | 0.608511571  | 0.521 | 0.415 | 0.01083417 | T cells, CD4+, naive, stimulated |
| <b>Plekhm1</b> | 7.81E-07 | -0.577856201 | 0.055 | 0.18  | 0.01104918 | T cells, CD4+, naive, stimulated |
| <b>Ptp4a2</b>  | 7.97E-07 | -0.512338756 | 0.214 | 0.381 | 0.01127709 | T cells, CD4+, naive, stimulated |
| <b>Zc3h12a</b> | 8.65E-07 | -0.71609983  | 0.097 | 0.229 | 0.01224084 | T cells, CD4+, naive, stimulated |
| <b>Nme3</b>    | 8.67E-07 | 0.403020266  | 0.109 | 0.037 | 0.01227813 | T cells, CD4+, naive, stimulated |
| <b>Pgap1</b>   | 8.7E-07  | -0.581113564 | 0.088 | 0.229 | 0.01230957 | T cells, CD4+, naive, stimulated |
| <b>Ctbp1</b>   | 8.72E-07 | -0.560879888 | 0.16  | 0.301 | 0.01234615 | T cells, CD4+, naive, stimulated |
| <b>Samhd1</b>  | 8.77E-07 | -0.459483461 | 0.353 | 0.527 | 0.01241603 | T cells, CD4+, naive, stimulated |
| <b>Vars</b>    | 9E-07    | -0.542707129 | 0.193 | 0.343 | 0.01274159 | T cells, CD4+, naive, stimulated |
| <b>Ifrd1</b>   | 9.62E-07 | -0.621450369 | 0.193 | 0.358 | 0.01361490 | T cells, CD4+, naive, stimulated |
| <b>Pycard</b>  | 1.02E-06 | 0.449142552  | 0.164 | 0.07  | 0.01448710 | T cells, CD4+, naive, stimulated |
| <b>Ewsr1</b>   | 1.04E-06 | -0.552366209 | 0.176 | 0.325 | 0.01468908 | T cells, CD4+, naive, stimulated |
| <b>Gimap6</b>  | 1.1E-06  | -0.509902557 | 0.462 | 0.636 | 0.01551879 | T cells, CD4+, naive, stimulated |
| <b>Srsf5</b>   | 1.13E-06 | -0.416694771 | 0.391 | 0.576 | 0.01593166 | T cells, CD4+, naive, stimulated |
| <b>Tcf3</b>    | 1.19E-06 | -0.700619622 | 0.16  | 0.298 | 0.01688892 | T cells, CD4+, naive, stimulated |
| <b>Ap2m1</b>   | 1.21E-06 | -0.503147755 | 0.172 | 0.318 | 0.01715560 | T cells, CD4+, naive, stimulated |
| <b>Sgms1</b>   | 1.24E-06 | -0.56399821  | 0.084 | 0.217 | 0.01758569 | T cells, CD4+, naive, stimulated |
| <b>Myo1c</b>   | 1.25E-06 | -0.70105206  | 0.109 | 0.237 | 0.01776362 | T cells, CD4+, naive, stimulated |
| <b>Tmem14c</b> | 1.27E-06 | 0.690215876  | 0.286 | 0.164 | 0.01791204 | T cells, CD4+, naive, stimulated |
| <b>Crip1</b>   | 1.27E-06 | 0.961224445  | 0.66  | 0.619 | 0.01792428 | T cells, CD4+, naive, stimulated |
| <b>Csnk1g3</b> | 1.28E-06 | -0.625634951 | 0.13  | 0.272 | 0.01808598 | T cells, CD4+, naive, stimulated |
| <b>Eif5a</b>   | 1.28E-06 | 0.699907202  | 0.63  | 0.608 | 0.01813763 | T cells, CD4+, naive, stimulated |
| <b>Cox5a</b>   | 1.31E-06 | 0.622859914  | 0.538 | 0.439 | 0.0184797  | T cells, CD4+, naive, stimulated |

|                |          |              |       |       |            |                                  |
|----------------|----------|--------------|-------|-------|------------|----------------------------------|
| <b>Canx</b>    | 1.31E-06 | -0.611418429 | 0.143 | 0.285 | 0.01860896 | T cells, CD4+, naive, stimulated |
| <b>Bcl2a1d</b> | 1.34E-06 | 0.524702012  | 0.122 | 0.045 | 0.01903815 | T cells, CD4+, naive, stimulated |
| <b>Atp5g3</b>  | 1.39E-06 | 0.552337335  | 0.626 | 0.566 | 0.01974196 | T cells, CD4+, naive, stimulated |
| <b>Ubald2</b>  | 1.4E-06  | -0.729262259 | 0.189 | 0.331 | 0.01979826 | T cells, CD4+, naive, stimulated |
| <b>Lpgat1</b>  | 1.4E-06  | -0.586752925 | 0.071 | 0.195 | 0.01988664 | T cells, CD4+, naive, stimulated |
| <b>Tfr3</b>    | 1.42E-06 | -0.531122441 | 0.017 | 0.119 | 0.02015429 | T cells, CD4+, naive, stimulated |
| <b>Birc3</b>   | 1.47E-06 | -0.655283974 | 0.227 | 0.374 | 0.02083266 | T cells, CD4+, naive, stimulated |
| <b>Ets2</b>    | 1.49E-06 | -0.742971205 | 0.105 | 0.234 | 0.02102335 | T cells, CD4+, naive, stimulated |
| <b>Lrp10</b>   | 1.58E-06 | -0.577771342 | 0.176 | 0.332 | 0.02233062 | T cells, CD4+, naive, stimulated |
| <b>Mrpl57</b>  | 1.58E-06 | 0.53349823   | 0.231 | 0.118 | 0.02235106 | T cells, CD4+, naive, stimulated |
| <b>Mirt1</b>   | 1.69E-06 | -0.634733111 | 0.071 | 0.192 | 0.02388113 | T cells, CD4+, naive, stimulated |
| <b>Cuta</b>    | 1.69E-06 | 0.536459687  | 0.298 | 0.172 | 0.02388835 | T cells, CD4+, naive, stimulated |
| <b>Srp54b</b>  | 1.69E-06 | -0.618991335 | 0.038 | 0.147 | 0.02390302 | T cells, CD4+, naive, stimulated |
| <b>Aldoa</b>   | 1.69E-06 | 0.551321154  | 0.613 | 0.545 | 0.02396035 | T cells, CD4+, naive, stimulated |
| <b>Sptbn1</b>  | 1.74E-06 | -0.624530616 | 0.155 | 0.297 | 0.02462054 | T cells, CD4+, naive, stimulated |
| <b>Atp5o</b>   | 1.75E-06 | 0.656796462  | 0.433 | 0.314 | 0.02478828 | T cells, CD4+, naive, stimulated |
| <b>Setd2</b>   | 1.76E-06 | -0.659008145 | 0.08  | 0.203 | 0.02492582 | T cells, CD4+, naive, stimulated |
| <b>Bcl10</b>   | 1.8E-06  | -0.552277971 | 0.214 | 0.368 | 0.02543632 | T cells, CD4+, naive, stimulated |
| <b>Rnf144a</b> | 1.85E-06 | -0.465763369 | 0.021 | 0.128 | 0.02621845 | T cells, CD4+, naive, stimulated |
| <b>Eif4b</b>   | 1.91E-06 | -0.432613696 | 0.16  | 0.312 | 0.02707667 | T cells, CD4+, naive, stimulated |
| <b>Tprgl</b>   | 1.94E-06 | -0.583702081 | 0.139 | 0.276 | 0.02749747 | T cells, CD4+, naive, stimulated |
| <b>H2-DMb1</b> | 2.01E-06 | -0.399504729 | 0.185 | 0.358 | 0.02839765 | T cells, CD4+, naive, stimulated |
| <b>Nfkb1</b>   | 2.02E-06 | -0.615245173 | 0.105 | 0.233 | 0.02858495 | T cells, CD4+, naive, stimulated |
| <b>Ccm2</b>    | 2.03E-06 | -0.528069619 | 0.139 | 0.282 | 0.02876528 | T cells, CD4+, naive, stimulated |
| <b>Tubb4b</b>  | 2.04E-06 | -0.309148325 | 0.357 | 0.558 | 0.02894015 | T cells, CD4+, naive, stimulated |
| <b>Ddx3x</b>   | 2.1E-06  | -0.624713905 | 0.168 | 0.308 | 0.02970595 | T cells, CD4+, naive, stimulated |
| <b>Ppp1cb</b>  | 2.15E-06 | -0.460256355 | 0.088 | 0.221 | 0.03038284 | T cells, CD4+, naive, stimulated |
| <b>M6pr</b>    | 2.17E-06 | -0.555657208 | 0.13  | 0.268 | 0.03074002 | T cells, CD4+, naive, stimulated |
| <b>Plekha2</b> | 2.19E-06 | -0.519475644 | 0.227 | 0.378 | 0.03106045 | T cells, CD4+, naive, stimulated |
| <b>Epn1</b>    | 2.43E-06 | -0.656084448 | 0.164 | 0.293 | 0.03436850 | T cells, CD4+, naive, stimulated |
| <b>Rps23</b>   | 2.56E-06 | 0.267425912  | 0.958 | 0.932 | 0.03623855 | T cells, CD4+, naive, stimulated |
| <b>Atxn2l</b>  | 2.58E-06 | -0.634249014 | 0.109 | 0.238 | 0.03656275 | T cells, CD4+, naive, stimulated |
| <b>Rpl10</b>   | 2.63E-06 | -0.335043503 | 0.58  | 0.784 | 0.03722545 | T cells, CD4+, naive, stimulated |
| <b>Supt5</b>   | 2.65E-06 | -0.638286553 | 0.076 | 0.195 | 0.03754925 | T cells, CD4+, naive, stimulated |
| <b>Med13</b>   | 2.81E-06 | -0.61905881  | 0.092 | 0.216 | 0.03978995 | T cells, CD4+, naive, stimulated |

|                 |          |              |       |       |            |                                  |
|-----------------|----------|--------------|-------|-------|------------|----------------------------------|
| <b>Tpm3</b>     | 2.87E-06 | -0.360923637 | 0.353 | 0.533 | 0.04069326 | T cells, CD4+, naive, stimulated |
| <b>Scand1</b>   | 2.89E-06 | 0.620812787  | 0.508 | 0.402 | 0.04084642 | T cells, CD4+, naive, stimulated |
| <b>Coq10b</b>   | 2.89E-06 | -0.604325474 | 0.181 | 0.321 | 0.04087787 | T cells, CD4+, naive, stimulated |
| <b>Cmah</b>     | 2.9E-06  | -0.529159189 | 0.126 | 0.264 | 0.04103584 | T cells, CD4+, naive, stimulated |
| <b>Neu1</b>     | 2.91E-06 | -0.585586477 | 0.084 | 0.208 | 0.04124317 | T cells, CD4+, naive, stimulated |
| <b>Snx2</b>     | 2.99E-06 | -0.393481784 | 0.349 | 0.532 | 0.04228977 | T cells, CD4+, naive, stimulated |
| <b>Il21r</b>    | 3.05E-06 | -0.592230062 | 0.118 | 0.257 | 0.04313737 | T cells, CD4+, naive, stimulated |
| <b>Cox8a</b>    | 3.11E-06 | 0.414109729  | 0.752 | 0.751 | 0.04405273 | T cells, CD4+, naive, stimulated |
| <b>Pgam1</b>    | 3.12E-06 | -0.478434286 | 0.109 | 0.247 | 0.04411167 | T cells, CD4+, naive, stimulated |
| <b>Srebfb2</b>  | 3.15E-06 | -0.698759243 | 0.105 | 0.222 | 0.04458867 | T cells, CD4+, naive, stimulated |
| <b>Jak1</b>     | 3.19E-06 | -0.465535969 | 0.345 | 0.511 | 0.04515896 | T cells, CD4+, naive, stimulated |
| <b>Blnk</b>     | 3.24E-06 | -0.417249407 | 0.315 | 0.48  | 0.04587920 | T cells, CD4+, naive, stimulated |
| <b>Gm15987</b>  | 3.27E-06 | 0.623617184  | 0.282 | 0.163 | 0.04633557 | T cells, CD4+, naive, stimulated |
| <b>Csrnp1</b>   | 3.34E-06 | -0.553526632 | 0.13  | 0.265 | 0.04728476 | T cells, CD4+, naive, stimulated |
| <b>Cnn2</b>     | 3.35E-06 | -0.496402129 | 0.298 | 0.466 | 0.04738089 | T cells, CD4+, naive, stimulated |
| <b>Serinc1</b>  | 3.48E-06 | -0.555559898 | 0.109 | 0.237 | 0.04921098 | T cells, CD4+, naive, stimulated |
| <b>Anp32a</b>   | 3.48E-06 | 0.684212189  | 0.508 | 0.39  | 0.04928864 | T cells, CD4+, naive, stimulated |
| <b>Rps24</b>    | 3.81E-38 | -2.696910849 | 0.5   | 1     | 5.4E-34    | T cells, CD4+, naive             |
| <b>Rpl35a</b>   | 1.01E-37 | -3.577355138 | 0.183 | 0.996 | 1.42E-33   | T cells, CD4+, naive             |
| <b>Rps20</b>    | 1.13E-37 | -2.646777825 | 0.45  | 0.999 | 1.59E-33   | T cells, CD4+, naive             |
| <b>Rps27</b>    | 1.5E-37  | -2.959578322 | 0.533 | 0.997 | 2.13E-33   | T cells, CD4+, naive             |
| <b>Rpl39</b>    | 2.01E-36 | -2.929883993 | 0.3   | 0.994 | 2.85E-32   | T cells, CD4+, naive             |
| <b>Rps4x</b>    | 2.78E-36 | -2.671061898 | 0.367 | 0.999 | 3.93E-32   | T cells, CD4+, naive             |
| <b>mt-Co1</b>   | 3.05E-36 | 1.997916372  | 0.983 | 0.999 | 4.31E-32   | T cells, CD4+, naive             |
| <b>Rpl35</b>    | 8.52E-36 | -3.016926422 | 0.217 | 0.996 | 1.21E-31   | T cells, CD4+, naive             |
| <b>Uba52</b>    | 1.06E-35 | -2.551752822 | 0.467 | 1     | 1.5E-31    | T cells, CD4+, naive             |
| <b>Rpl38</b>    | 1.35E-35 | -2.606756715 | 0.4   | 0.99  | 1.91E-31   | T cells, CD4+, naive             |
| <b>Rps16</b>    | 1.37E-35 | -2.387327132 | 0.483 | 0.999 | 1.94E-31   | T cells, CD4+, naive             |
| <b>Rpl37</b>    | 2.76E-35 | -2.429441147 | 0.417 | 0.998 | 3.9E-31    | T cells, CD4+, naive             |
| <b>Rpl21</b>    | 3.83E-35 | -2.634162269 | 0.283 | 0.997 | 5.43E-31   | T cells, CD4+, naive             |
| <b>Tpt1</b>     | 6.24E-35 | -2.677099973 | 0.333 | 0.997 | 8.84E-31   | T cells, CD4+, naive             |
| <b>mt-Co3</b>   | 7.33E-35 | 2.13779805   | 0.983 | 0.999 | 1.04E-30   | T cells, CD4+, naive             |
| <b>Fau</b>      | 7.5E-35  | -2.080418056 | 0.7   | 1     | 1.06E-30   | T cells, CD4+, naive             |
| <b>Rps29</b>    | 1.31E-34 | -2.882513815 | 0.417 | 0.994 | 1.85E-30   | T cells, CD4+, naive             |
| <b>Rpl9-ps6</b> | 1.41E-34 | -2.549682112 | 0.333 | 0.999 | 1.99E-30   | T cells, CD4+, naive             |

|                |          |              |       |       |          |                      |
|----------------|----------|--------------|-------|-------|----------|----------------------|
| <b>Rps8</b>    | 1.62E-34 | -2.15901935  | 0.583 | 0.999 | 2.3E-30  | T cells, CD4+, naive |
| <b>Rps13</b>   | 1.81E-34 | -2.549772324 | 0.317 | 0.998 | 2.57E-30 | T cells, CD4+, naive |
| <b>mt-Co2</b>  | 1.9E-34  | 2.066322527  | 1     | 0.998 | 2.69E-30 | T cells, CD4+, naive |
| <b>Rpl32</b>   | 2.57E-34 | -2.633161574 | 0.3   | 0.996 | 3.64E-30 | T cells, CD4+, naive |
| <b>Rps28</b>   | 2.71E-34 | -2.745192816 | 0.317 | 0.992 | 3.83E-30 | T cells, CD4+, naive |
| <b>Rps10</b>   | 5.64E-34 | -2.529220269 | 0.333 | 0.996 | 7.99E-30 | T cells, CD4+, naive |
| <b>Gm10076</b> | 7.65E-34 | -2.264151278 | 0.5   | 0.997 | 1.08E-29 | T cells, CD4+, naive |
| <b>Rpl23</b>   | 9.78E-34 | -2.364612867 | 0.4   | 0.998 | 1.38E-29 | T cells, CD4+, naive |
| <b>Rpl6</b>    | 1.37E-33 | -2.064090526 | 0.5   | 0.998 | 1.94E-29 | T cells, CD4+, naive |
| <b>Rpl18a</b>  | 2.3E-33  | -2.502407948 | 0.35  | 0.999 | 3.26E-29 | T cells, CD4+, naive |
| <b>Rps15a</b>  | 2.9E-33  | -2.210398065 | 0.483 | 0.996 | 4.1E-29  | T cells, CD4+, naive |
| <b>Rps27a</b>  | 4.03E-33 | -2.465098476 | 0.317 | 0.996 | 5.71E-29 | T cells, CD4+, naive |
| <b>Rps19</b>   | 4.04E-33 | -2.390446995 | 0.383 | 0.992 | 5.72E-29 | T cells, CD4+, naive |
| <b>Rps7</b>    | 4.24E-33 | -2.205006417 | 0.467 | 0.999 | 6E-29    | T cells, CD4+, naive |
| <b>Rps26</b>   | 7.62E-33 | -2.685770773 | 0.25  | 0.998 | 1.08E-28 | T cells, CD4+, naive |
| <b>Rpl17</b>   | 1.15E-32 | -2.460876433 | 0.317 | 0.984 | 1.63E-28 | T cells, CD4+, naive |
| <b>Malat1</b>  | 1.43E-32 | 2.595699148  | 1     | 0.993 | 2.02E-28 | T cells, CD4+, naive |
| <b>Rps3a1</b>  | 1.03E-31 | -1.913470326 | 0.55  | 0.999 | 1.46E-27 | T cells, CD4+, naive |
| <b>Eef1a1</b>  | 1.26E-31 | -2.059307181 | 0.533 | 0.993 | 1.79E-27 | T cells, CD4+, naive |
| <b>Rpl34</b>   | 1.41E-31 | -2.316257838 | 0.35  | 0.998 | 1.99E-27 | T cells, CD4+, naive |
| <b>Rpl37a</b>  | 2.48E-31 | -2.030722418 | 0.533 | 0.995 | 3.51E-27 | T cells, CD4+, naive |
| <b>Rps5</b>    | 3.15E-31 | -2.109673612 | 0.433 | 0.998 | 4.46E-27 | T cells, CD4+, naive |
| <b>Rplp0</b>   | 3.36E-31 | -2.258004848 | 0.383 | 0.995 | 4.75E-27 | T cells, CD4+, naive |
| <b>Rpl19</b>   | 4.42E-31 | -1.960211454 | 0.5   | 0.999 | 6.26E-27 | T cells, CD4+, naive |
| <b>Rps3</b>    | 5.67E-31 | -2.085868052 | 0.417 | 0.996 | 8.02E-27 | T cells, CD4+, naive |
| <b>Rpl27a</b>  | 8.04E-31 | -2.173299037 | 0.367 | 0.994 | 1.14E-26 | T cells, CD4+, naive |
| <b>Rpl13</b>   | 8.5E-31  | -1.923598113 | 0.533 | 0.999 | 1.2E-26  | T cells, CD4+, naive |
| <b>Rpl30</b>   | 9.54E-31 | -2.034430263 | 0.467 | 0.999 | 1.35E-26 | T cells, CD4+, naive |
| <b>Rpl28</b>   | 1.48E-30 | -2.091405196 | 0.383 | 0.992 | 2.1E-26  | T cells, CD4+, naive |
| <b>Rps21</b>   | 1.74E-30 | -2.160158774 | 0.433 | 0.997 | 2.46E-26 | T cells, CD4+, naive |
| <b>Rpl27</b>   | 1.87E-30 | -2.550813954 | 0.183 | 0.975 | 2.65E-26 | T cells, CD4+, naive |
| <b>Tmsb4x</b>  | 7.33E-30 | -1.91973581  | 0.633 | 0.996 | 1.04E-25 | T cells, CD4+, naive |
| <b>Fth1</b>    | 1.32E-29 | -2.208877319 | 0.517 | 1     | 1.87E-25 | T cells, CD4+, naive |
| <b>Rplp1</b>   | 1.47E-29 | -2.138530947 | 0.383 | 0.992 | 2.08E-25 | T cells, CD4+, naive |
| <b>Rpl36</b>   | 1.95E-29 | -1.995731477 | 0.367 | 0.996 | 2.76E-25 | T cells, CD4+, naive |

|                  |          |              |       |       |          |                      |
|------------------|----------|--------------|-------|-------|----------|----------------------|
| <b>Rps12</b>     | 5.48E-29 | -2.547294454 | 0.183 | 0.971 | 7.76E-25 | T cells, CD4+, naive |
| <b>Rpl8</b>      | 6.55E-29 | -1.840849972 | 0.467 | 0.996 | 9.27E-25 | T cells, CD4+, naive |
| <b>H3f3a</b>     | 9.96E-29 | -2.073494215 | 0.383 | 0.992 | 1.41E-24 | T cells, CD4+, naive |
| <b>Rps9</b>      | 1.65E-28 | -2.059891965 | 0.383 | 0.987 | 2.34E-24 | T cells, CD4+, naive |
| <b>Rpl26</b>     | 2.89E-28 | -2.268122615 | 0.233 | 0.984 | 4.09E-24 | T cells, CD4+, naive |
| <b>Tmsb10</b>    | 1.16E-27 | -1.813006234 | 0.6   | 0.998 | 1.64E-23 | T cells, CD4+, naive |
| <b>Rpl22</b>     | 1.16E-27 | -2.277139321 | 0.2   | 0.981 | 1.65E-23 | T cells, CD4+, naive |
| <b>Rpl18</b>     | 2.27E-27 | -1.885514554 | 0.4   | 0.996 | 3.21E-23 | T cells, CD4+, naive |
| <b>mt-Nd1</b>    | 2.5E-27  | 2.025489167  | 0.983 | 0.963 | 3.55E-23 | T cells, CD4+, naive |
| <b>mt-Atp8</b>   | 3.39E-27 | 1.932638597  | 1     | 0.993 | 4.81E-23 | T cells, CD4+, naive |
| <b>mt-Cytb</b>   | 1.25E-26 | 1.876603827  | 0.967 | 0.991 | 1.77E-22 | T cells, CD4+, naive |
| <b>Rpsa</b>      | 1.57E-26 | -1.728328668 | 0.533 | 0.998 | 2.22E-22 | T cells, CD4+, naive |
| <b>Rpl24</b>     | 7.56E-26 | -2.237099604 | 0.183 | 0.966 | 1.07E-21 | T cells, CD4+, naive |
| <b>Rps23</b>     | 8.55E-26 | -2.185840558 | 0.233 | 0.961 | 1.21E-21 | T cells, CD4+, naive |
| <b>Rpl10-ps3</b> | 1.19E-25 | -2.182419338 | 0.233 | 0.959 | 1.69E-21 | T cells, CD4+, naive |
| <b>Rpl7</b>      | 9.12E-25 | -2.040232761 | 0.267 | 0.961 | 1.29E-20 | T cells, CD4+, naive |
| <b>Rps25</b>     | 1.86E-24 | -2.577952822 | 0.05  | 0.829 | 2.63E-20 | T cells, CD4+, naive |
| <b>Rplp2</b>     | 2.36E-24 | -1.767311386 | 0.3   | 0.985 | 3.34E-20 | T cells, CD4+, naive |
| <b>Rps11</b>     | 3.74E-24 | -1.746011405 | 0.417 | 0.995 | 5.29E-20 | T cells, CD4+, naive |
| <b>Rpl36a</b>    | 1.09E-23 | -1.9466586   | 0.2   | 0.958 | 1.55E-19 | T cells, CD4+, naive |
| <b>Rpl13a</b>    | 4.37E-22 | -1.580884018 | 0.467 | 0.989 | 6.19E-18 | T cells, CD4+, naive |
| <b>Atp5e</b>     | 1.04E-21 | -2.203171315 | 0.067 | 0.811 | 1.47E-17 | T cells, CD4+, naive |
| <b>Naca</b>      | 1.33E-21 | -1.850428928 | 0.117 | 0.897 | 1.89E-17 | T cells, CD4+, naive |
| <b>Rps2</b>      | 1.41E-21 | -1.318272307 | 0.617 | 0.998 | 2E-17    | T cells, CD4+, naive |
| <b>mt-Atp6</b>   | 1.55E-21 | 1.807606465  | 0.933 | 0.967 | 2.2E-17  | T cells, CD4+, naive |
| <b>Rpl29</b>     | 2.87E-21 | -1.711191574 | 0.333 | 0.978 | 4.07E-17 | T cells, CD4+, naive |
| <b>Rpl11</b>     | 1.48E-20 | -1.355651566 | 0.483 | 0.992 | 2.09E-16 | T cells, CD4+, naive |
| <b>mt-Nd2</b>    | 1.72E-20 | 1.832922375  | 0.917 | 0.937 | 2.44E-16 | T cells, CD4+, naive |
| <b>Rpl23a</b>    | 2.38E-20 | -2.210230337 | 0.033 | 0.748 | 3.37E-16 | T cells, CD4+, naive |
| <b>Rpl3</b>      | 3.57E-20 | -1.595605437 | 0.35  | 0.969 | 5.06E-16 | T cells, CD4+, naive |
| <b>Rpl14</b>     | 3.69E-20 | -1.691126759 | 0.217 | 0.954 | 5.23E-16 | T cells, CD4+, naive |
| <b>Ftl1</b>      | 4.4E-20  | -1.614213678 | 0.4   | 0.984 | 6.22E-16 | T cells, CD4+, naive |
| <b>Eif1</b>      | 9.71E-20 | -1.272654508 | 0.567 | 0.993 | 1.38E-15 | T cells, CD4+, naive |
| <b>Serp1</b>     | 1.21E-19 | -1.729549136 | 0.117 | 0.839 | 1.71E-15 | T cells, CD4+, naive |
| <b>Rpl15</b>     | 1.93E-19 | -1.562506932 | 0.333 | 0.978 | 2.73E-15 | T cells, CD4+, naive |

|                 |          |              |       |       |          |                      |
|-----------------|----------|--------------|-------|-------|----------|----------------------|
| <b>Btf3</b>     | 3.18E-19 | -1.81803085  | 0.1   | 0.836 | 4.5E-15  | T cells, CD4+, naive |
| <b>Eef1b2</b>   | 4.37E-19 | -1.853240014 | 0.133 | 0.851 | 6.18E-15 | T cells, CD4+, naive |
| <b>Chchd2</b>   | 1.15E-18 | -1.868455126 | 0.167 | 0.871 | 1.63E-14 | T cells, CD4+, naive |
| <b>Rpl31</b>    | 1.17E-18 | -1.919488873 | 0.05  | 0.745 | 1.66E-14 | T cells, CD4+, naive |
| <b>Ubb</b>      | 1.67E-18 | -1.241484547 | 0.567 | 0.995 | 2.36E-14 | T cells, CD4+, naive |
| <b>Rpl9</b>     | 2.07E-18 | -1.645814677 | 0.167 | 0.892 | 2.94E-14 | T cells, CD4+, naive |
| <b>Pfdn5</b>    | 2.08E-18 | -1.760120358 | 0.067 | 0.77  | 2.95E-14 | T cells, CD4+, naive |
| <b>Rps14</b>    | 2.64E-18 | -1.49407673  | 0.333 | 0.981 | 3.74E-14 | T cells, CD4+, naive |
| <b>Rps18</b>    | 2.74E-18 | -1.572025112 | 0.35  | 0.951 | 3.89E-14 | T cells, CD4+, naive |
| <b>Gabarap</b>  | 7.53E-18 | -2.118497762 | 0.017 | 0.665 | 1.07E-13 | T cells, CD4+, naive |
| <b>Sub1</b>     | 1.03E-17 | -1.727291823 | 0.2   | 0.891 | 1.46E-13 | T cells, CD4+, naive |
| <b>Arhgdib</b>  | 1.12E-17 | -1.513021463 | 0.183 | 0.903 | 1.58E-13 | T cells, CD4+, naive |
| <b>Gpx1</b>     | 1.19E-17 | -2.142151558 | 0.05  | 0.714 | 1.68E-13 | T cells, CD4+, naive |
| <b>Sh3bgrl3</b> | 1.34E-17 | -1.687968253 | 0.15  | 0.861 | 1.9E-13  | T cells, CD4+, naive |
| <b>Cox8a</b>    | 1.44E-17 | -1.624318545 | 0.083 | 0.775 | 2.04E-13 | T cells, CD4+, naive |
| <b>Limd2</b>    | 4.06E-17 | -1.964497519 | 0.067 | 0.724 | 5.75E-13 | T cells, CD4+, naive |
| <b>Eif3f</b>    | 4.87E-17 | -1.574525195 | 0.167 | 0.877 | 6.89E-13 | T cells, CD4+, naive |
| <b>Rpl36al</b>  | 7.77E-17 | -1.533912469 | 0.15  | 0.846 | 1.1E-12  | T cells, CD4+, naive |
| <b>Rpl7a</b>    | 8.9E-17  | -1.403657088 | 0.217 | 0.919 | 1.26E-12 | T cells, CD4+, naive |
| <b>Rps17</b>    | 1.24E-16 | -1.822072279 | 0.067 | 0.72  | 1.75E-12 | T cells, CD4+, naive |
| <b>mt-Nd4l</b>  | 1.45E-16 | 1.765220475  | 0.933 | 0.969 | 2.06E-12 | T cells, CD4+, naive |
| <b>Rpl10a</b>   | 1.59E-16 | -1.338346621 | 0.4   | 0.984 | 2.24E-12 | T cells, CD4+, naive |
| <b>Gng5</b>     | 1.73E-16 | -2.10419182  | 0.033 | 0.654 | 2.45E-12 | T cells, CD4+, naive |
| <b>Cfl1</b>     | 2.66E-16 | -1.588968764 | 0.233 | 0.886 | 3.76E-12 | T cells, CD4+, naive |
| <b>Ppia</b>     | 3.61E-16 | -1.237137482 | 0.433 | 0.99  | 5.1E-12  | T cells, CD4+, naive |
| <b>mt-Nd5</b>   | 5.57E-15 | 1.858224446  | 0.817 | 0.832 | 7.88E-11 | T cells, CD4+, naive |
| <b>Rpl4</b>     | 1.12E-14 | -1.272476619 | 0.183 | 0.851 | 1.58E-10 | T cells, CD4+, naive |
| <b>Rpl12</b>    | 1.34E-14 | -1.328887737 | 0.317 | 0.935 | 1.9E-10  | T cells, CD4+, naive |
| <b>Dazap2</b>   | 1.35E-14 | -1.638367665 | 0.05  | 0.648 | 1.92E-10 | T cells, CD4+, naive |
| <b>Serf2</b>    | 1.36E-14 | -1.357076485 | 0.183 | 0.865 | 1.93E-10 | T cells, CD4+, naive |
| <b>H3f3b</b>    | 1.66E-14 | -1.022539994 | 0.767 | 0.992 | 2.34E-10 | T cells, CD4+, naive |
| <b>Rpl22l1</b>  | 2.2E-14  | -1.349715032 | 0.133 | 0.778 | 3.11E-10 | T cells, CD4+, naive |
| <b>Rps15</b>    | 2.41E-14 | -1.307883801 | 0.183 | 0.871 | 3.41E-10 | T cells, CD4+, naive |
| <b>Oaz1</b>     | 2.46E-14 | -1.32406022  | 0.233 | 0.907 | 3.48E-10 | T cells, CD4+, naive |
| <b>Cox4i1</b>   | 7.64E-14 | -1.236822438 | 0.117 | 0.749 | 1.08E-09 | T cells, CD4+, naive |



|                |          |              |       |       |          |                      |
|----------------|----------|--------------|-------|-------|----------|----------------------|
| <b>Lsp1</b>    | 1.33E-13 | -1.376993585 | 0.1   | 0.698 | 1.89E-09 | T cells, CD4+, naive |
| <b>Nsa2</b>    | 1.9E-13  | -1.418384899 | 0.05  | 0.62  | 2.69E-09 | T cells, CD4+, naive |
| <b>Ubl5</b>    | 1.91E-13 | -1.63054205  | 0.033 | 0.585 | 2.7E-09  | T cells, CD4+, naive |
| <b>Pcbp2</b>   | 2.02E-13 | -1.208204608 | 0.133 | 0.75  | 2.86E-09 | T cells, CD4+, naive |
| <b>Gnas</b>    | 2.6E-13  | -1.256659502 | 0.117 | 0.722 | 3.68E-09 | T cells, CD4+, naive |
| <b>Rps6</b>    | 3.95E-13 | -1.221509496 | 0.25  | 0.88  | 5.59E-09 | T cells, CD4+, naive |
| <b>Sec61g</b>  | 5.48E-13 | -1.349605945 | 0.067 | 0.632 | 7.76E-09 | T cells, CD4+, naive |
| <b>Zfp706</b>  | 5.84E-13 | -1.752964427 | 0.033 | 0.567 | 8.27E-09 | T cells, CD4+, naive |
| <b>Hmgb1</b>   | 6.84E-13 | -1.232513719 | 0.1   | 0.692 | 9.69E-09 | T cells, CD4+, naive |
| <b>Uqcrh</b>   | 8.61E-13 | -1.153776019 | 0.117 | 0.716 | 1.22E-08 | T cells, CD4+, naive |
| <b>Pfn1</b>    | 1.09E-12 | -1.188642182 | 0.35  | 0.961 | 1.55E-08 | T cells, CD4+, naive |
| <b>Npm1</b>    | 1.37E-12 | -1.238404236 | 0.133 | 0.738 | 1.94E-08 | T cells, CD4+, naive |
| <b>My112b</b>  | 2.1E-12  | -1.186258472 | 0.1   | 0.671 | 2.98E-08 | T cells, CD4+, naive |
| <b>Klf2</b>    | 2.45E-12 | -1.412093888 | 0.483 | 0.934 | 3.47E-08 | T cells, CD4+, naive |
| <b>Rpl10</b>   | 3.13E-12 | -1.238808898 | 0.167 | 0.777 | 4.43E-08 | T cells, CD4+, naive |
| <b>Atp5h</b>   | 5.51E-12 | -1.732751316 | 0.017 | 0.513 | 7.8E-08  | T cells, CD4+, naive |
| <b>Rpl5</b>    | 1.32E-11 | -1.057759285 | 0.233 | 0.872 | 1.87E-07 | T cells, CD4+, naive |
| <b>Hspe1</b>   | 1.62E-11 | -1.490107464 | 0.25  | 0.804 | 2.29E-07 | T cells, CD4+, naive |
| <b>Eif3h</b>   | 1.71E-11 | -1.217814057 | 0.067 | 0.591 | 2.42E-07 | T cells, CD4+, naive |
| <b>Ucp2</b>    | 1.79E-11 | -1.2970289   | 0.133 | 0.69  | 2.54E-07 | T cells, CD4+, naive |
| <b>Ybx1</b>    | 2.07E-11 | -0.922530081 | 0.117 | 0.678 | 2.93E-07 | T cells, CD4+, naive |
| <b>Eef2</b>    | 2.1E-11  | -1.071152982 | 0.333 | 0.93  | 2.97E-07 | T cells, CD4+, naive |
| <b>Cox6c</b>   | 2.74E-11 | -1.311244038 | 0.05  | 0.554 | 3.88E-07 | T cells, CD4+, naive |
| <b>Grcc10</b>  | 3.92E-11 | -1.454934575 | 0.05  | 0.544 | 5.55E-07 | T cells, CD4+, naive |
| <b>Bri3</b>    | 5.63E-11 | -1.271256935 | 0.067 | 0.576 | 7.97E-07 | T cells, CD4+, naive |
| <b>Actg1</b>   | 8.47E-11 | -0.991479931 | 0.333 | 0.919 | 1.2E-06  | T cells, CD4+, naive |
| <b>Hspa8</b>   | 9.97E-11 | -1.366215183 | 0.55  | 0.929 | 1.41E-06 | T cells, CD4+, naive |
| <b>Calm2</b>   | 1.02E-10 | -1.021131412 | 0.15  | 0.71  | 1.44E-06 | T cells, CD4+, naive |
| <b>Pcbp1</b>   | 1.09E-10 | -1.188048689 | 0.1   | 0.624 | 1.55E-06 | T cells, CD4+, naive |
| <b>Tsc22d3</b> | 1.12E-10 | -1.131450944 | 0.25  | 0.833 | 1.59E-06 | T cells, CD4+, naive |
| <b>Ccl5</b>    | 1.25E-10 | 2.260052187  | 0.3   | 0.08  | 1.77E-06 | T cells, CD4+, naive |
| <b>Rhoa</b>    | 1.34E-10 | -0.904177053 | 0.2   | 0.774 | 1.89E-06 | T cells, CD4+, naive |
| <b>Gapdh</b>   | 1.34E-10 | -1.067443796 | 0.3   | 0.891 | 1.9E-06  | T cells, CD4+, naive |
| <b>Sap18</b>   | 1.37E-10 | -1.552643625 | 0.033 | 0.497 | 1.94E-06 | T cells, CD4+, naive |
| <b>Paip2</b>   | 1.63E-10 | -1.742263942 | 0     | 0.435 | 2.31E-06 | T cells, CD4+, naive |

|                 |          |              |       |       |          |                      |
|-----------------|----------|--------------|-------|-------|----------|----------------------|
| <b>Ost4</b>     | 1.66E-10 | -1.200101722 | 0.05  | 0.531 | 2.35E-06 | T cells, CD4+, naive |
| <b>Cox7a2</b>   | 1.85E-10 | -1.357188957 | 0.017 | 0.466 | 2.62E-06 | T cells, CD4+, naive |
| <b>Atp5g3</b>   | 2.19E-10 | -0.82811982  | 0.083 | 0.593 | 3.1E-06  | T cells, CD4+, naive |
| <b>Slc25a5</b>  | 2.26E-10 | -1.161831692 | 0.05  | 0.527 | 3.2E-06  | T cells, CD4+, naive |
| <b>Tomm7</b>    | 2.39E-10 | -1.524106109 | 0.017 | 0.462 | 3.38E-06 | T cells, CD4+, naive |
| <b>Crip1</b>    | 2.76E-10 | -1.504239701 | 0.133 | 0.642 | 3.91E-06 | T cells, CD4+, naive |
| <b>Atp5d</b>    | 4.16E-10 | -1.085426227 | 0.083 | 0.579 | 5.89E-06 | T cells, CD4+, naive |
| <b>Rbm3</b>     | 4.17E-10 | -1.055759852 | 0.25  | 0.813 | 5.9E-06  | T cells, CD4+, naive |
| <b>Rac2</b>     | 4.34E-10 | -0.940845296 | 0.183 | 0.746 | 6.14E-06 | T cells, CD4+, naive |
| <b>Atp5l</b>    | 7.5E-10  | -1.084366104 | 0.1   | 0.593 | 1.06E-05 | T cells, CD4+, naive |
| <b>Atp5g2</b>   | 8.56E-10 | -0.874475842 | 0.15  | 0.701 | 1.21E-05 | T cells, CD4+, naive |
| <b>Tuba1a</b>   | 1.08E-09 | -1.371647224 | 0.083 | 0.551 | 1.52E-05 | T cells, CD4+, naive |
| <b>Coro1a</b>   | 1.12E-09 | -0.776129614 | 0.333 | 0.919 | 1.59E-05 | T cells, CD4+, naive |
| <b>Dnajb1</b>   | 1.18E-09 | -1.548487711 | 0.2   | 0.677 | 1.67E-05 | T cells, CD4+, naive |
| <b>Ptp4a3</b>   | 1.29E-09 | -1.00650493  | 0.067 | 0.53  | 1.82E-05 | T cells, CD4+, naive |
| <b>Cox7c</b>    | 1.76E-09 | -0.683688183 | 0.167 | 0.71  | 2.5E-05  | T cells, CD4+, naive |
| <b>Edf1</b>     | 1.96E-09 | -1.357058557 | 0.033 | 0.463 | 2.78E-05 | T cells, CD4+, naive |
| <b>Ptpn18</b>   | 2.05E-09 | -1.09971834  | 0.083 | 0.551 | 2.9E-05  | T cells, CD4+, naive |
| <b>Ndufa7</b>   | 2.25E-09 | -1.378237746 | 0.033 | 0.458 | 3.19E-05 | T cells, CD4+, naive |
| <b>Ptma</b>     | 2.43E-09 | -0.817038294 | 0.6   | 0.991 | 3.44E-05 | T cells, CD4+, naive |
| <b>mt-Nd4</b>   | 2.91E-09 | 1.477751512  | 0.75  | 0.807 | 4.12E-05 | T cells, CD4+, naive |
| <b>Ndufa2</b>   | 2.92E-09 | -1.592345868 | 0     | 0.393 | 4.13E-05 | T cells, CD4+, naive |
| <b>Calm1</b>    | 3.29E-09 | -0.623104747 | 0.267 | 0.861 | 4.66E-05 | T cells, CD4+, naive |
| <b>Ebf1</b>     | 3.3E-09  | 1.327722614  | 0.783 | 0.906 | 4.67E-05 | T cells, CD4+, naive |
| <b>Pkig</b>     | 3.41E-09 | -1.149826185 | 0.033 | 0.456 | 4.82E-05 | T cells, CD4+, naive |
| <b>Snrpf</b>    | 3.43E-09 | -1.262666447 | 0.017 | 0.423 | 4.86E-05 | T cells, CD4+, naive |
| <b>Rasgrp2</b>  | 3.61E-09 | -1.285783061 | 0.05  | 0.482 | 5.12E-05 | T cells, CD4+, naive |
| <b>Eif3k</b>    | 3.76E-09 | -1.002109846 | 0.1   | 0.567 | 5.33E-05 | T cells, CD4+, naive |
| <b>Ndufa3</b>   | 3.78E-09 | -0.921785974 | 0.083 | 0.548 | 5.35E-05 | T cells, CD4+, naive |
| <b>S100a10</b>  | 4E-09    | -0.976184697 | 0.1   | 0.578 | 5.67E-05 | T cells, CD4+, naive |
| <b>Ifi27l2a</b> | 4.05E-09 | -1.595222573 | 0.083 | 0.528 | 5.74E-05 | T cells, CD4+, naive |
| <b>Cox5b</b>    | 4.3E-09  | -0.693331686 | 0.1   | 0.577 | 6.09E-05 | T cells, CD4+, naive |
| <b>Plac8</b>    | 4.39E-09 | -1.846609321 | 0.033 | 0.441 | 6.22E-05 | T cells, CD4+, naive |
| <b>Tuba1b</b>   | 4.4E-09  | -1.002233607 | 0.033 | 0.451 | 6.22E-05 | T cells, CD4+, naive |
| <b>Ppp1ca</b>   | 4.48E-09 | -0.881166303 | 0.117 | 0.606 | 6.35E-05 | T cells, CD4+, naive |

|                   |          |              |       |       |            |                      |
|-------------------|----------|--------------|-------|-------|------------|----------------------|
| <b>Cox6b1</b>     | 5.15E-09 | -0.977990204 | 0.067 | 0.511 | 7.29E-05   | T cells, CD4+, naive |
| <b>Actb</b>       | 6.04E-09 | -0.623980639 | 0.8   | 0.998 | 8.55E-05   | T cells, CD4+, naive |
| <b>Sec61b</b>     | 6.43E-09 | -0.925102461 | 0.067 | 0.51  | 9.11E-05   | T cells, CD4+, naive |
| <b>Eif5a</b>      | 6.55E-09 | -0.799401007 | 0.133 | 0.629 | 9.28E-05   | T cells, CD4+, naive |
| <b>Sumo2</b>      | 7.49E-09 | -0.757748425 | 0.133 | 0.634 | 0.00010608 | T cells, CD4+, naive |
| <b>Atp5j2</b>     | 7.68E-09 | -1.053140073 | 0.067 | 0.505 | 0.00010874 | T cells, CD4+, naive |
| <b>D8Erttd738</b> | 8.93E-09 | -0.881649646 | 0.133 | 0.625 | 0.00012634 | T cells, CD4+, naive |
| <b>Snrpg</b>      | 1.09E-08 | -0.649077269 | 0.133 | 0.629 | 0.00015443 | T cells, CD4+, naive |
| <b>Rhob</b>       | 1.12E-08 | -1.359371807 | 0.067 | 0.493 | 0.00015858 | T cells, CD4+, naive |
| <b>Gnb2</b>       | 1.14E-08 | -0.967063308 | 0.067 | 0.5   | 0.00016087 | T cells, CD4+, naive |
| <b>Rbx1</b>       | 1.26E-08 | -1.175344711 | 0.033 | 0.434 | 0.00017837 | T cells, CD4+, naive |
| <b>Hmgn1</b>      | 1.37E-08 | -0.8269314   | 0.1   | 0.562 | 0.00019404 | T cells, CD4+, naive |
| <b>Eif3i</b>      | 1.5E-08  | -1.212089224 | 0.017 | 0.4   | 0.00021175 | T cells, CD4+, naive |
| <b>Zfp36</b>      | 1.61E-08 | -0.753085506 | 0.233 | 0.759 | 0.00022744 | T cells, CD4+, naive |
| <b>Nme2</b>       | 1.97E-08 | -0.622454917 | 0.133 | 0.619 | 0.00027905 | T cells, CD4+, naive |
| <b>Cd52</b>       | 1.97E-08 | -0.654603539 | 0.367 | 0.924 | 0.00027912 | T cells, CD4+, naive |
| <b>Jund</b>       | 2E-08    | -0.797030227 | 0.5   | 0.948 | 0.00028257 | T cells, CD4+, naive |
| <b>Cirbp</b>      | 2.23E-08 | -0.954781159 | 0.067 | 0.485 | 0.00031636 | T cells, CD4+, naive |
| <b>Rbm39</b>      | 2.26E-08 | 1.247277426  | 0.767 | 0.862 | 0.00032046 | T cells, CD4+, naive |
| <b>Hnrnpf</b>     | 2.5E-08  | -0.845871703 | 0.183 | 0.68  | 0.00035377 | T cells, CD4+, naive |
| <b>Arpc1b</b>     | 2.66E-08 | -0.78248671  | 0.167 | 0.663 | 0.00037630 | T cells, CD4+, naive |
| <b>Hnrnpab</b>    | 3.22E-08 | -0.792792197 | 0.083 | 0.518 | 0.00045585 | T cells, CD4+, naive |
| <b>Tmem258</b>    | 3.49E-08 | -1.058300304 | 0.033 | 0.417 | 0.00049350 | T cells, CD4+, naive |
| <b>Cox7a2l</b>    | 3.88E-08 | -1.009555274 | 0.067 | 0.476 | 0.00054948 | T cells, CD4+, naive |
| <b>Eif3e</b>      | 3.98E-08 | -1.041891065 | 0.05  | 0.449 | 0.00056343 | T cells, CD4+, naive |
| <b>Gmfg</b>       | 4.01E-08 | -0.83709458  | 0.1   | 0.537 | 0.00056837 | T cells, CD4+, naive |
| <b>Rpl41</b>      | 4.55E-08 | -0.810396402 | 0.333 | 0.891 | 0.00064447 | T cells, CD4+, naive |
| <b>Hnrnpk</b>     | 4.87E-08 | -0.543938039 | 0.15  | 0.632 | 0.00068965 | T cells, CD4+, naive |
| <b>Psmb8</b>      | 6.53E-08 | -0.554114492 | 0.133 | 0.599 | 0.00092448 | T cells, CD4+, naive |
| <b>Banf1</b>      | 6.77E-08 | -1.426936135 | 0     | 0.343 | 0.00095887 | T cells, CD4+, naive |
| <b>Fis1</b>       | 7E-08    | -0.78597335  | 0.067 | 0.472 | 0.00099045 | T cells, CD4+, naive |
| <b>Trmt112</b>    | 7.27E-08 | -1.045683512 | 0.05  | 0.434 | 0.00102952 | T cells, CD4+, naive |
| <b>Myl12a</b>     | 7.39E-08 | -0.697037061 | 0.067 | 0.47  | 0.00104595 | T cells, CD4+, naive |
| <b>Pgls</b>       | 7.97E-08 | -0.924594419 | 0.033 | 0.406 | 0.00112817 | T cells, CD4+, naive |
| <b>Atp5j</b>      | 8.36E-08 | -0.672509555 | 0.067 | 0.47  | 0.00118325 | T cells, CD4+, naive |

|                |          |              |       |       |            |                      |
|----------------|----------|--------------|-------|-------|------------|----------------------|
| <b>H2afv</b>   | 1.05E-07 | -1.136851447 | 0.017 | 0.368 | 0.00149097 | T cells, CD4+, naive |
| <b>Polr1d</b>  | 1.06E-07 | -0.941349178 | 0.083 | 0.492 | 0.00150204 | T cells, CD4+, naive |
| <b>Atp5c1</b>  | 1.32E-07 | -0.789121515 | 0.067 | 0.457 | 0.00186637 | T cells, CD4+, naive |
| <b>Smim14</b>  | 1.33E-07 | -0.858825758 | 0.117 | 0.543 | 0.00187900 | T cells, CD4+, naive |
| <b>Ndufa4</b>  | 1.42E-07 | -0.68406039  | 0.083 | 0.493 | 0.00201602 | T cells, CD4+, naive |
| <b>Nol7</b>    | 1.43E-07 | -1.036578797 | 0.05  | 0.426 | 0.00202858 | T cells, CD4+, naive |
| <b>Arpc3</b>   | 1.58E-07 | -0.589810259 | 0.217 | 0.729 | 0.00223349 | T cells, CD4+, naive |
| <b>Cox17</b>   | 1.68E-07 | -1.019887206 | 0.017 | 0.36  | 0.00238277 | T cells, CD4+, naive |
| <b>Cnn2</b>    | 1.69E-07 | -0.73001621  | 0.067 | 0.456 | 0.00239049 | T cells, CD4+, naive |
| <b>Preli1</b>  | 1.72E-07 | -1.181066025 | 0.017 | 0.36  | 0.00243925 | T cells, CD4+, naive |
| <b>Psme1</b>   | 1.87E-07 | -0.611992249 | 0.117 | 0.545 | 0.00264874 | T cells, CD4+, naive |
| <b>Tbca</b>    | 1.88E-07 | -1.253828653 | 0.017 | 0.357 | 0.00266262 | T cells, CD4+, naive |
| <b>Pabpc1</b>  | 2.11E-07 | -0.570141809 | 0.317 | 0.831 | 0.00299375 | T cells, CD4+, naive |
| <b>Prkar1a</b> | 2.51E-07 | -0.810260702 | 0.067 | 0.449 | 0.00354636 | T cells, CD4+, naive |
| <b>Ran</b>     | 2.65E-07 | -0.649951918 | 0.083 | 0.481 | 0.00374840 | T cells, CD4+, naive |
| <b>Capg</b>    | 2.66E-07 | -0.950642084 | 0.05  | 0.416 | 0.00375987 | T cells, CD4+, naive |
| <b>Nop10</b>   | 2.81E-07 | -0.762649261 | 0.1   | 0.509 | 0.00398154 | T cells, CD4+, naive |
| <b>Hmgn2</b>   | 2.97E-07 | -0.742456611 | 0.083 | 0.477 | 0.00420502 | T cells, CD4+, naive |
| <b>Myl6</b>    | 3.03E-07 | -0.557082629 | 0.183 | 0.667 | 0.00428500 | T cells, CD4+, naive |
| <b>Ndufa6</b>  | 3.68E-07 | -0.820845684 | 0.083 | 0.467 | 0.00521009 | T cells, CD4+, naive |
| <b>Uqcrb</b>   | 3.7E-07  | -0.733852977 | 0.05  | 0.412 | 0.00523285 | T cells, CD4+, naive |
| <b>Cox6a1</b>  | 3.78E-07 | -0.505469526 | 0.1   | 0.503 | 0.00534480 | T cells, CD4+, naive |
| <b>Atp5f1</b>  | 3.89E-07 | -0.772939438 | 0.067 | 0.443 | 0.00550417 | T cells, CD4+, naive |
| <b>Fam107b</b> | 3.93E-07 | -0.598781519 | 0.217 | 0.675 | 0.00555897 | T cells, CD4+, naive |
| <b>Ier5</b>    | 4.41E-07 | -0.712199404 | 0.2   | 0.668 | 0.00623949 | T cells, CD4+, naive |
| <b>Psmb1</b>   | 4.55E-07 | -0.654843748 | 0.067 | 0.44  | 0.00643630 | T cells, CD4+, naive |
| <b>Vim</b>     | 4.87E-07 | -0.713396793 | 0.083 | 0.461 | 0.00689075 | T cells, CD4+, naive |
| <b>Hint1</b>   | 5.15E-07 | -0.729761975 | 0.1   | 0.501 | 0.00728449 | T cells, CD4+, naive |
| <b>Ostf1</b>   | 5.84E-07 | -1.020140139 | 0.033 | 0.369 | 0.00826655 | T cells, CD4+, naive |
| <b>Cnp</b>     | 6.08E-07 | -0.929725635 | 0.033 | 0.37  | 0.00860350 | T cells, CD4+, naive |
| <b>Ndufa13</b> | 6.62E-07 | -0.880137033 | 0.067 | 0.428 | 0.00936816 | T cells, CD4+, naive |
| <b>Btg1</b>    | 6.89E-07 | -0.826062171 | 0.6   | 0.935 | 0.00975348 | T cells, CD4+, naive |
| <b>Supt4a</b>  | 7.17E-07 | -0.799168047 | 0.05  | 0.398 | 0.01015650 | T cells, CD4+, naive |
| <b>Tgif1</b>   | 7.21E-07 | -0.748194424 | 0.083 | 0.46  | 0.01020004 | T cells, CD4+, naive |
| <b>Psma2</b>   | 7.3E-07  | -0.979048519 | 0.033 | 0.366 | 0.01033269 | T cells, CD4+, naive |

|                 |          |              |       |       |            |                      |
|-----------------|----------|--------------|-------|-------|------------|----------------------|
| <b>Tgfb1</b>    | 7.39E-07 | -0.630980817 | 0.15  | 0.579 | 0.01045925 | T cells, CD4+, naive |
| <b>Atp5g1</b>   | 7.86E-07 | -1.082901077 | 0.017 | 0.333 | 0.01113190 | T cells, CD4+, naive |
| <b>Atp5k</b>    | 9.05E-07 | -0.782352407 | 0.033 | 0.363 | 0.01281325 | T cells, CD4+, naive |
| <b>Tubb4b</b>   | 9.29E-07 | -0.539925707 | 0.133 | 0.545 | 0.01315787 | T cells, CD4+, naive |
| <b>Nedd8</b>    | 1.08E-06 | -0.828398848 | 0.033 | 0.36  | 0.01535067 | T cells, CD4+, naive |
| <b>Eef1g</b>    | 1.15E-06 | -0.381002151 | 0.15  | 0.59  | 0.01632382 | T cells, CD4+, naive |
| <b>Ubl3</b>     | 1.25E-06 | -0.384253978 | 0.033 | 0.357 | 0.01769084 | T cells, CD4+, naive |
| <b>Hmgb2</b>    | 1.27E-06 | -0.925194947 | 0.05  | 0.388 | 0.01798122 | T cells, CD4+, naive |
| <b>Gm8369</b>   | 1.41E-06 | -0.848040315 | 0.117 | 0.493 | 0.01996355 | T cells, CD4+, naive |
| <b>Anp32a</b>   | 1.54E-06 | -0.37532023  | 0.067 | 0.418 | 0.02185347 | T cells, CD4+, naive |
| <b>Pdpf</b>     | 1.61E-06 | -0.731067177 | 0.1   | 0.475 | 0.02282497 | T cells, CD4+, naive |
| <b>Med28</b>    | 1.69E-06 | -1.015747202 | 0.017 | 0.319 | 0.02388707 | T cells, CD4+, naive |
| <b>Ptges3</b>   | 1.76E-06 | -0.978549349 | 0.033 | 0.348 | 0.02492353 | T cells, CD4+, naive |
| <b>Cdc42</b>    | 1.82E-06 | -0.479207948 | 0.217 | 0.704 | 0.02570414 | T cells, CD4+, naive |
| <b>Atp6v1g1</b> | 1.86E-06 | -0.97294693  | 0.017 | 0.317 | 0.02635178 | T cells, CD4+, naive |
| <b>Snrpd2</b>   | 1.91E-06 | -1.131887147 | 0.017 | 0.316 | 0.02710563 | T cells, CD4+, naive |
| <b>Cox5a</b>    | 1.95E-06 | -0.719441022 | 0.1   | 0.466 | 0.02756689 | T cells, CD4+, naive |
| <b>Psenen</b>   | 2.07E-06 | -0.674518072 | 0.033 | 0.348 | 0.02923284 | T cells, CD4+, naive |
| <b>Tomm22</b>   | 2.1E-06  | -0.79652909  | 0.05  | 0.379 | 0.02965807 | T cells, CD4+, naive |
| <b>Eif3m</b>    | 2.14E-06 | -0.606523693 | 0.017 | 0.315 | 0.03026595 | T cells, CD4+, naive |
| <b>Marcks11</b> | 2.4E-06  | -1.307061089 | 0.017 | 0.312 | 0.03397825 | T cells, CD4+, naive |
| <b>Msmo1</b>    | 2.45E-06 | 1.51990511   | 0.15  | 0.035 | 0.03472852 | T cells, CD4+, naive |
| <b>Atp5o</b>    | 2.55E-06 | -1.030006544 | 0.033 | 0.342 | 0.03604062 | T cells, CD4+, naive |
| <b>Tubb5</b>    | 2.58E-06 | -0.615471196 | 0.067 | 0.408 | 0.03656894 | T cells, CD4+, naive |
| <b>Tonsl</b>    | 2.67E-06 | -0.977805194 | 0.017 | 0.311 | 0.03779258 | T cells, CD4+, naive |
| <b>Scand1</b>   | 2.68E-06 | -0.866820015 | 0.083 | 0.429 | 0.03794662 | T cells, CD4+, naive |
| <b>Tma7</b>     | 2.8E-06  | -0.406575378 | 0.117 | 0.503 | 0.03959379 | T cells, CD4+, naive |
| <b>Rp9</b>      | 2.88E-06 | -0.791728247 | 0.033 | 0.342 | 0.04080254 | T cells, CD4+, naive |
| <b>Dynll1</b>   | 3.23E-06 | -0.56163598  | 0.25  | 0.721 | 0.04571682 | T cells, CD4+, naive |
| <b>Ube2s</b>    | 3.24E-06 | -0.500886748 | 0.083 | 0.437 | 0.04586725 | T cells, CD4+, naive |
| <b>Nfkbia</b>   | 3.25E-06 | -0.396224486 | 0.183 | 0.612 | 0.04600556 | T cells, CD4+, naive |
| <b>Tmem243</b>  | 3.35E-06 | -1.00552805  | 0.017 | 0.307 | 0.04741444 | T cells, CD4+, naive |
| <b>Snx3</b>     | 3.4E-06  | -0.455066984 | 0.083 | 0.431 | 0.04809645 | T cells, CD4+, naive |
| <b>Wbp2</b>     | 3.47E-06 | -0.890093826 | 0.033 | 0.338 | 0.04913496 | T cells, CD4+, naive |
