# Supplementary material for: The Regulation Network of Glycerolipid Metabolism as Coregulators of Immunotherapy-Related Myocarditis
Source: Hindawi journal article supplement (doi:10.1155/2023/8774971), 2023-06-21
Supplement: f3 [file 8774971.f3.pdf]

Table S3

| Ontology ID | Description | GeneRatio  | BgRatio                                                                              | pvalue  | p.adjust  | qvalue   |          |          |
|-------------|-------------|------------|--------------------------------------------------------------------------------------|---------|-----------|----------|----------|----------|
| GO:0022613  | BP          | GO:0022613 | ribonucleoprotein complex biogenesis                                                 | 73/1133 | 412/29008 | 1.12E-27 | 5.96E-24 | 3.99E-24 |
| GO:0008380  | BP          | GO:0008380 | RNA splicing                                                                         | 68/1133 | 398/29008 | 6.62E-25 | 1.76E-21 | 1.18E-21 |
| GO:0043484  | BP          | GO:0043484 | regulation of RNA splicing                                                           | 41/1133 | 157/29008 | 1.2E-22  | 2.12E-19 | 1.42E-19 |
| GO:1903311  | BP          | GO:1903311 | regulation of mRNA metabolic process                                                 | 54/1133 | 293/29008 | 1.33E-21 | 1.76E-18 | 1.18E-18 |
| GO:0043161  | BP          | GO:0043161 | proteasome-mediated ubiquitin-dependent protein catabolic process                    | 63/1133 | 423/29008 | 5.95E-20 | 6.33E-17 | 4.24E-17 |
| GO:0006397  | BP          | GO:0006397 | mRNA processing                                                                      | 66/1133 | 469/29008 | 1.64E-19 | 1.46E-16 | 9.76E-17 |
| GO:0042254  | BP          | GO:0042254 | ribosome biogenesis                                                                  | 50/1133 | 296/29008 | 2.01E-18 | 1.53E-15 | 1.02E-15 |
| GO:0016570  | BP          | GO:0016570 | histone modification                                                                 | 63/1133 | 461/29008 | 4.94E-18 | 3.29E-15 | 2.2E-15  |
| GO:006325   | BP          | GO:006325  | chromatin organization                                                               | 64/1133 | 477/29008 | 6.83E-18 | 4.03E-15 | 2.7E-15  |
| GO:0042274  | BP          | GO:0042274 | ribosomal small subunit biogenesis                                                   | 24/1133 | 72/29008  | 1.66E-16 | 8.82E-14 | 5.9E-14  |
| GO:1903320  | BP          | GO:1903320 | regulation of protein modification by small protein conjugation or removal           | 43/1133 | 248/29008 | 1.85E-16 | 8.93E-14 | 5.98E-14 |
| GO:0034976  | BP          | GO:0034976 | response to endoplasmic reticulum stress                                             | 43/1133 | 254/29008 | 4.54E-16 | 2.01E-13 | 1.35E-13 |
| GO:0022618  | BP          | GO:0022618 | ribonucleoprotein complex assembly                                                   | 35/1133 | 171/29008 | 6.13E-16 | 2.05E-13 | 1.37E-13 |
| GO:0000375  | BP          | GO:0000375 | RNA splicing, via transesterification reactions                                      | 45/1133 | 279/29008 | 6.18E-16 | 2.05E-13 | 1.37E-13 |
| GO:0000377  | BP          | GO:0000377 | RNA splicing, via transesterification reactions with bulged adenosine as nucleophile | 45/1133 | 279/29008 | 6.18E-16 | 2.05E-13 | 1.37E-13 |
| GO:0000398  | BP          | GO:0000398 | mRNA splicing, via spliceosome                                                       | 45/1133 | 279/29008 | 6.18E-16 | 2.05E-13 | 1.37E-13 |
| GO:0006986  | BP          | GO:0006986 | response to unfolded protein                                                         | 29/1133 | 116/29008 | 7.11E-16 | 2.23E-13 | 1.49E-13 |
| GO:0035966  | BP          | GO:0035966 | response to topologically incorrect protein                                          | 31/1133 | 138/29008 | 1.83E-15 | 5.41E-13 | 3.62E-13 |
| GO:0071826  | BP          | GO:0071826 | ribonucleoprotein complex subunit organization                                       | 35/1133 | 178/29008 | 2.25E-15 | 6.29E-13 | 4.21E-13 |
| GO:0031331  | BP          | GO:0031331 | positive regulation of cellular catabolic process                                    | 55/1133 | 425/29008 | 7.09E-15 | 1.89E-12 | 1.26E-12 |
| GO:0009896  | BP          | GO:0009896 | positive regulation of catabolic process                                             | 60/1133 | 494/29008 | 7.69E-15 | 1.95E-12 | 1.3E-12  |
| GO:0006913  | BP          | GO:0006913 | nucleocytoplasmic transport                                                          | 47/1133 | 327/29008 | 1.29E-14 | 2.98E-12 | 2E-12    |
| GO:0051169  | BP          | GO:0051169 | nuclear transport                                                                    | 47/1133 | 327/29008 | 1.29E-14 | 2.98E-12 | 2E-12    |
| GO:0034248  | BP          | GO:0034248 | regulation of cellular amide metabolic process                                       | 56/1133 | 448/29008 | 1.8E-14  | 4E-12    | 2.68E-12 |
| GO:0002181  | BP          | GO:0002181 | cytoplasmic translation                                                              | 25/1133 | 96/29008  | 2.53E-14 | 5.26E-12 | 3.52E-12 |
| GO:0006364  | BP          | GO:0006364 | rRNA processing                                                                      | 37/1133 | 214/29008 | 2.57E-14 | 5.26E-12 | 3.52E-12 |
| GO:0030099  | BP          | GO:0030099 | myeloid cell differentiation                                                         | 54/1133 | 426/29008 | 2.98E-14 | 5.87E-12 | 3.93E-12 |
| GO:0006457  | BP          | GO:0006457 | protein folding                                                                      | 32/1133 | 163/29008 | 3.71E-14 | 7.04E-12 | 4.72E-12 |
| GO:2001233  | BP          | GO:2001233 | regulation of apoptotic signaling pathway                                            | 52/1133 | 402/29008 | 3.96E-14 | 7.27E-12 | 4.87E-12 |
| GO:0050684  | BP          | GO:0050684 | regulation of mRNA processing                                                        | 30/1133 | 148/29008 | 9.57E-14 | 1.7E-11  | 1.14E-11 |
| GO:0016072  | BP          | GO:0016072 | rRNA metabolic process                                                               | 37/1133 | 224/29008 | 1.12E-13 | 1.92E-11 | 1.29E-11 |
| GO:0006417  | BP          | GO:0006417 | regulation of translation                                                            | 50/1133 | 390/29008 | 1.74E-13 | 2.89E-11 | 1.94E-11 |
| GO:0016032  | BP          | GO:0016032 | viral process                                                                        | 46/1133 | 346/29008 | 4.4E-13  | 7.08E-11 | 4.75E-11 |
| GO:0140694  | BP          | GO:0140694 | non-membrane-bounded organelle assembly                                              | 48/1133 | 373/29008 | 4.63E-13 | 7.24E-11 | 4.85E-11 |
| GO:0042176  | BP          | GO:0042176 | regulation of protein catabolic process                                              | 49/1133 | 389/29008 | 5.93E-13 | 9.01E-11 | 6.04E-11 |
| GO:0030098  | BP          | GO:0030098 | lymphocyte differentiation                                                           | 52/1133 | 441/29008 | 1.55E-12 | 2.3E-10  | 1.54E-10 |
| GO:0043281  | BP          | GO:0043281 | regulation of cysteine-type endopeptidase activity involved in apoptotic process     | 34/1133 | 210/29008 | 1.99E-12 | 2.86E-10 | 1.91E-10 |
| GO:0034620  | BP          | GO:0034620 | cellular response to unfolded protein                                                | 22/1133 | 88/29008  | 2.21E-12 | 3.09E-10 | 2.07E-10 |
| GO:1903131  | BP          | GO:1903131 | mononuclear cell differentiation                                                     | 55/1133 | 489/29008 | 2.37E-12 | 3.23E-10 | 2.16E-10 |
| GO:0035967  | BP          | GO:0035967 | cellular response to topologically incorrect protein                                 | 24/1133 | 108/29008 | 3.5E-12  | 4.6E-10  | 3.08E-10 |
| GO:0046631  | BP          | GO:0046631 | alpha-beta T cell activation                                                         | 31/1133 | 180/29008 | 3.55E-12 | 4.6E-10  | 3.08E-10 |
| GO:2000116  | BP          | GO:2000116 | regulation of cysteine-type endopeptidase activity                                   | 36/1133 | 239/29008 | 4.01E-12 | 5.08E-10 | 3.4E-10  |
| GO:007264   | BP          | GO:007264  | small GTPase mediated signal transduction                                            | 50/1133 | 425/29008 | 4.55E-12 | 5.63E-10 | 3.77E-10 |
| GO:0006338  | BP          | GO:0006338 | chromatin remodeling                                                                 | 33/1133 | 208/29008 | 7.42E-12 | 8.97E-10 | 6.01E-10 |
| GO:0018205  | BP          | GO:0018205 | peptidyl-lysine modification                                                         | 46/1133 | 375/29008 | 7.72E-12 | 9.03E-10 | 6.05E-10 |
| GO:0002683  | BP          | GO:0002683 | negative regulation of immune system process                                         | 52/1133 | 460/29008 | 7.81E-12 | 9.03E-10 | 6.05E-10 |
| GO:0031396  | BP          | GO:0031396 | regulation of protein ubiquitination                                                 | 33/1133 | 214/29008 | 1.64E-11 | 1.86E-09 | 1.24E-09 |
| GO:0030522  | BP          | GO:0030522 | intracellular receptor signaling pathway                                             | 33/1133 | 217/29008 | 2.41E-11 | 2.67E-09 | 1.78E-09 |
| GO:0006402  | BP          | GO:0006402 | mRNA catabolic process                                                               | 34/1133 | 231/29008 | 3.03E-11 | 3.29E-09 | 2.2E-09  |
| GO:0048024  | BP          | GO:0048024 | regulation of mRNA splicing, via spliceosome                                         | 23/1133 | 110/29008 | 3.71E-11 | 3.95E-09 | 2.65E-09 |
| GO:0043434  | BP          | GO:0043434 | response to peptide hormone                                                          | 43/1133 | 351/29008 | 3.88E-11 | 4.04E-09 | 2.71E-09 |
| GO:0006401  | BP          | GO:0006401 | rRNA catabolic process                                                               | 37/1133 | 272/29008 | 4.36E-11 | 4.46E-09 | 2.99E-09 |
| GO:0009615  | BP          | GO:0009615 | response to virus                                                                    | 40/1133 | 312/29008 | 4.6E-11  | 4.53E-09 | 3.04E-09 |
| GO:0010563  | BP          | GO:0010563 | negative regulation of phosphorus metabolic process                                  | 50/1133 | 433/29008 | 4.69E-11 | 4.53E-09 | 3.04E-09 |
| GO:0045936  | BP          | GO:0045936 | negative regulation of phosphate metabolic process                                   | 50/1133 | 433/29008 | 4.69E-11 | 4.53E-09 | 3.04E-09 |
| GO:1901652  | BP          | GO:1901652 | response to peptide                                                                  | 47/1133 | 412/29008 | 5.82E-11 | 5.52E-09 | 3.7E-09  |
| GO:1903322  | BP          | GO:1903322 | positive regulation of protein modification by small protein conjugation or removal  | 26/1133 | 145/29008 | 7.65E-11 | 7.14E-09 | 4.78E-09 |
| GO:0007249  | BP          | GO:0007249 | I-kappaB kinase/NF-kappaB signaling                                                  | 33/1133 | 228/29008 | 9.29E-11 | 8.45E-09 | 5.66E-09 |
| GO:0036503  | BP          | GO:0036503 | ERAD pathway                                                                         | 22/1133 | 105/29008 | 9.45E-11 | 8.45E-09 | 5.66E-09 |
| GO:0072594  | BP          | GO:0072594 | establishment of protein localization to organelle                                   | 47/1133 | 418/29008 | 9.54E-11 | 8.45E-09 | 5.66E-09 |
| GO:0071824  | BP          | GO:0071824 | protein-DNA complex subunit organization                                             | 30/1133 | 192/29008 | 9.74E-11 | 8.49E-09 | 5.69E-09 |
| GO:0043543  | BP          | GO:0043543 | protein acylation                                                                    | 34/1133 | 243/29008 | 1.23E-10 | 1.06E-08 | 7.09E-09 |
| GO:0006333  | BP          | GO:0006333 | chromatin assembly or disassembly                                                    | 24/1133 | 127/29008 | 1.31E-10 | 1.11E-08 | 7.4E-09  |
| GO:0006914  | BP          | GO:0006914 | autophagy                                                                            | 48/1133 | 437/29008 | 1.35E-10 | 1.11E-08 | 7.4E-09  |
| GO:0061919  | BP          | GO:0061919 | process utilizing autophagic mechanism                                               | 48/1133 | 437/29008 | 1.35E-10 | 1.11E-08 | 7.4E-09  |
| GO:0018209  | BP          | GO:0018209 | peptidyl-serine modification                                                         | 43/1133 | 365/29008 | 1.37E-10 | 1.11E-08 | 7.4E-09  |
| GO:0061013  | BP          | GO:0061013 | regulation of mRNA catabolic process                                                 | 27/1133 | 161/29008 | 1.63E-10 | 1.29E-08 | 8.64E-09 |
| GO:0001819  | BP          | GO:0001819 | positive regulation of cytokine production                                           | 52/1133 | 500/29008 | 1.7E-10  | 1.33E-08 | 8.92E-09 |
| GO:0043087  | BP          | GO:0043087 | regulation of GTPase activity                                                        | 40/1133 | 326/29008 | 1.77E-10 | 1.37E-08 | 9.14E-09 |
| GO:1903037  | BP          | GO:1903037 | regulation of leukocyte cell-cell adhesion                                           | 40/1133 | 333/29008 | 3.37E-10 | 2.56E-08 | 1.71E-08 |
| GO:0097193  | BP          | GO:0097193 | intrinsic apoptotic signaling pathway                                                | 38/1133 | 307/29008 | 3.91E-10 | 2.93E-08 | 1.96E-08 |
| GO:0030433  | BP          | GO:0030433 | ubiquitin-dependent ERAD pathway                                                     | 19/1133 | 84/29008  | 4.47E-10 | 3.3E-08  | 2.21E-08 |
| GO:0045862  | BP          | GO:0045862 | positive regulation of proteolysis                                                   | 41/1133 | 351/29008 | 4.76E-10 | 3.47E-08 | 2.32E-08 |
| GO:0051090  | BP          | GO:0051090 | regulation of DNA-binding transcription factor activity                              | 46/1133 | 425/29008 | 5.32E-10 | 3.82E-08 | 2.56E-08 |
| GO:0042326  | BP          | GO:0042326 | negative regulation of phosphorylation                                               | 44/1133 | 396/29008 | 5.52E-10 | 3.92E-08 | 2.62E-08 |
| GO:0018105  | BP          | GO:0018105 | peptidyl-serine phosphorylation                                                      | 40/1133 | 340/29008 | 6.27E-10 | 4.38E-08 | 2.94E-08 |
| GO:0006354  | BP          | GO:0006354 | DNA-templated transcription, elongation                                              | 19/1133 | 86/29008  | 6.87E-10 | 4.74E-08 | 3.18E-08 |
| GO:1903362  | BP          | GO:1903362 | regulation of cellular protein catabolic process                                     | 33/1133 | 246/29008 | 7E-10    | 4.77E-08 | 3.2E-08  |
| GO:0006413  | BP          | GO:0006413 | translational initiation                                                             | 22/1133 | 117/29008 | 8.48E-10 | 5.71E-08 | 3.82E-08 |
| GO:0007159  | BP          | GO:0007159 | leukocyte cell-cell adhesion                                                         | 42/1133 | 373/29008 | 9.07E-10 | 6.03E-08 | 4.04E-08 |
| GO:0031056  | BP          | GO:0031056 | regulation of histone modification                                                   | 27/1133 | 174/29008 | 9.77E-10 | 6.38E-08 | 4.27E-08 |
| GO:0034504  | BP          | GO:0034504 | protein localization to nucleus                                                      | 38/1133 | 317/29008 | 9.83E-10 | 6.38E-08 | 4.27E-08 |
| GO:0071375  | BP          | GO:0071375 | cellular response to peptide hormone stimulus                                        | 34/1133 | 264/29008 | 1.15E-09 | 7.37E-08 | 4.94E-08 |
| GO:0043488  | BP          | GO:0043488 | regulation of mRNA stability                                                         | 25/1133 | 152/29008 | 1.17E-09 | 7.4E-08  | 4.96E-08 |
| GO:0048872  | BP          | GO:0048872 | homeostasis of number of cells                                                       | 41/1133 | 363/29008 | 1.31E-09 | 8.19E-08 | 5.48E-08 |
| GO:0006473  | BP          | GO:0006473 | protein acetylation                                                                  | 29/1133 | 201/29008 | 1.36E-09 | 8.42E-08 | 5.64E-08 |
| GO:0031647  | BP          | GO:0031647 | regulation of protein stability                                                      | 37/1133 | 307/29008 | 1.4E-09  | 8.58E-08 | 5.74E-08 |
| GO:1901653  | BP          | GO:1901653 | cellular response to peptide                                                         | 37/1133 | 308/29008 | 1.54E-09 | 9.28E-08 | 6.22E-08 |
| GO:0043487  | BP          | GO:0043487 | regulation of RNA stability                                                          | 26/1133 | 166/29008 | 1.62E-09 | 9.68E-08 | 6.48E-08 |
| GO:0051168  | BP          | GO:0051168 | nuclear export                                                                       | 25/1133 | 155/29008 | 1.78E-09 | 1.05E-07 | 7.04E-08 |
| GO:0022407  | BP          | GO:0022407 | regulation of cell-cell adhesion                                                     | 47/1133 | 457/29008 | 1.85E-09 | 1.08E-07 | 7.25E-08 |
| GO:0032868  | BP          | GO:0032868 | response to insulin                                                                  | 32/1133 | 244/29008 | 2.24E-09 | 1.29E-07 | 8.66E-08 |
| GO:0030183  | BP          | GO:0030183 | B cell differentiation                                                               | 26/1133 | 170/29008 | 2.73E-09 | 1.56E-07 | 1.04E-07 |
| GO:0032869  | BP          | GO:0032869 | cellular response to insulin stimulus                                                | 29/1133 | 206/29008 | 3.05E-09 | 1.73E-07 | 1.16E-07 |
| GO:0034728  | BP          | GO:0034728 | nucleosome organization                                                              | 22/1133 | 125/29008 | 3.12E-09 | 1.74E-07 | 1.17E-07 |
| GO:0030490  | BP          | GO:0030490 | maturation of ssU-rRNA                                                               | 14/1133 | 49/29008  | 3.34E-09 | 1.82E-07 | 1.22E-07 |
| GO:0006605  | BP          | GO:0006605 | protein targeting                                                                    | 34/1133 | 275/29008 | 3.35E-09 | 1.82E-07 | 1.22E-07 |
| GO:0002029  | BP          | GO:0002029 | protein polyubiquitination                                                           | 32/1133 | 248/29008 | 3.36E-09 | 1.82E-07 | 1.22E-07 |
| GO:0034470  | BP          | GO:0034470 | ncRNA processing                                                                     | 40/1133 | 362/29008 | 3.92E-09 | 2.11E-07 | 1.41E-07 |
| GO:0008286  | BP          | GO:0008286 | insulin receptor signaling pathway                                                   | 22/1133 | 127/29008 | 4.24E-09 | 2.25E-07 | 1.51E-07 |
| GO:0043401  | BP          | GO:0043401 | steroid hormone mediated signaling pathway                                           | 21/1133 | 117/29008 | 4.91E-09 | 2.58E-07 | 1.73E-07 |
| GO:0033119  | BP          | GO:0033119 | negative regulation of RNA splicing                                                  | 11/1133 | 28/29008  | 5.57E-09 | 2.9E-07  | 1.94E-07 |
| GO:2001242  | BP          | GO:2001242 | regulation of intrinsic apoptotic signaling pathway                                  | 26/1133 | 176/29008 | 5.78E-09 | 2.98E-07 | 2E-07    |
| GO:0050863  | BP          | GO:0050863 | regulation of T cell activation                                                      | 38/1133 | 339/29008 | 6.45E-09 | 3.3E-07  | 2.21E-07 |
| GO:0043122  | BP          | GO:0043122 | regulation of I-kappaB kinase/NF-kappaB signaling                                    | 27/1133 | 190/29008 | 6.98E-09 | 3.53E-07 | 2.37E-07 |
| GO:0042026  | BP          | GO:0042026 | protein refolding                                                                    | 9/1133  | 18/29008  | 7.25E-09 | 3.64E-07 | 2.44E-07 |
| GO:0030217  | BP          | GO:0030217 | T cell differentiation                                                               | 35/1133 | 299/29008 | 8.33E-09 |          |          |

|            |    |            |                                                                                       |         |           |          |          |          |
|------------|----|------------|---------------------------------------------------------------------------------------|---------|-----------|----------|----------|----------|
| GO:0030518 | BP | GO:0030518 | Intracellular steroid hormone receptor signaling pathway                              | 19/1133 | 110/29008 | 5E-08    | 1.94E-06 | 1.3E-06  |
| GO:0001818 | BP | GO:0001818 | negative regulation of cytokine production                                            | 33/1133 | 292/29008 | 5.18E-08 | 1.99E-06 | 1.34E-06 |
| GO:0019080 | BP | GO:0019080 | viral gene expression                                                                 | 15/1133 | 69/29008  | 5.37E-08 | 2.05E-06 | 1.38E-06 |
| GO:0034249 | BP | GO:0034249 | negative regulation of cellular amide metabolic process                               | 27/1133 | 209/29008 | 5.42E-08 | 2.06E-06 | 1.38E-06 |
| GO:1903706 | BP | GO:1903706 | regulation of hemopoiesis                                                             | 40/1133 | 398/29008 | 5.55E-08 | 2.09E-06 | 1.4E-06  |
| GO:0006475 | BP | GO:0006475 | internal protein amino acid acetylation                                               | 23/1133 | 158/29008 | 5.69E-08 | 2.11E-06 | 1.41E-06 |
| GO:0018393 | BP | GO:0018393 | internal peptidyl-lysine acetylation                                                  | 23/1133 | 158/29008 | 5.69E-08 | 2.11E-06 | 1.41E-06 |
| GO:0044270 | BP | GO:0044270 | cellular nitrogen compound catabolic process                                          | 41/1133 | 414/29008 | 5.71E-08 | 2.11E-06 | 1.41E-06 |
| GO:0006446 | BP | GO:0006446 | regulation of translational initiation                                                | 14/1133 | 60/29008  | 5.74E-08 | 2.11E-06 | 1.41E-06 |
| GO:0000956 | BP | GO:0000956 | nuclear-transcribed mRNA catabolic process                                            | 19/1133 | 111/29008 | 5.82E-08 | 2.12E-06 | 1.42E-06 |
| GO:0042594 | BP | GO:0042594 | response to starvation                                                                | 25/1133 | 184/29008 | 6.17E-08 | 2.23E-06 | 1.49E-06 |
| GO:0048545 | BP | GO:0048545 | response to steroid hormone                                                           | 28/1133 | 226/29008 | 7.62E-08 | 2.74E-06 | 1.83E-06 |
| GO:0070661 | BP | GO:0070661 | leukocyte proliferation                                                               | 37/1133 | 358/29008 | 8.54E-08 | 3.05E-06 | 2.04E-06 |
| GO:1903050 | BP | GO:1903050 | regulation of proteolysis involved in cellular protein catabolic process              | 27/1133 | 214/29008 | 8.88E-08 | 3.15E-06 | 2.11E-06 |
| GO:0019439 | BP | GO:0019439 | aromatic compound catabolic process                                                   | 42/1133 | 437/29008 | 9.13E-08 | 3.22E-06 | 2.15E-06 |
| GO:2001234 | BP | GO:2001234 | negative regulation of apoptotic signaling pathway                                    | 29/1133 | 242/29008 | 9.33E-08 | 3.26E-06 | 2.19E-06 |
| GO:0042273 | BP | GO:0042273 | ribosomal large subunit biogenesis                                                    | 15/1133 | 72/29008  | 9.8E-08  | 3.41E-06 | 2.28E-06 |
| GO:0046651 | BP | GO:0046651 | lymphocyte proliferation                                                              | 35/1133 | 330/29008 | 1.01E-07 | 3.48E-06 | 2.33E-06 |
| GO:0009267 | BP | GO:0009267 | cellular response to starvation                                                       | 23/1133 | 164/29008 | 1.15E-07 | 3.93E-06 | 2.63E-06 |
| GO:2000117 | BP | GO:2000117 | negative regulation of cysteine-type endopeptidase activity                           | 17/1133 | 94/29008  | 1.25E-07 | 4.28E-06 | 2.86E-06 |
| GO:0051028 | BP | GO:0051028 | mRNA transport                                                                        | 19/1133 | 117/29008 | 1.38E-07 | 4.66E-06 | 3.12E-06 |
| GO:0043154 | BP | GO:0043154 | negative regulation of cysteine-type endopeptidase activity involved in apoptotic pro | 16/1133 | 84/29008  | 1.39E-07 | 4.66E-06 | 3.12E-06 |
| GO:1903313 | BP | GO:1903313 | positive regulation of mRNA metabolic process                                         | 20/1133 | 129/29008 | 1.44E-07 | 4.78E-06 | 3.2E-06  |
| GO:0043620 | BP | GO:0043620 | regulation of DNA-templated transcription in response to stress                       | 13/1133 | 55/29008  | 1.45E-07 | 4.78E-06 | 3.2E-06  |
| GO:0051170 | BP | GO:0051170 | import into nucleus                                                                   | 24/1133 | 179/29008 | 1.45E-07 | 4.78E-06 | 3.2E-06  |
| GO:0051056 | BP | GO:0051056 | regulation of small GTPase mediated signal transduction                               | 28/1133 | 233/29008 | 1.46E-07 | 4.78E-06 | 3.2E-06  |
| GO:0016571 | BP | GO:0016571 | histone methylation                                                                   | 22/1133 | 154/29008 | 1.54E-07 | 5.04E-06 | 3.37E-06 |
| GO:0043433 | BP | GO:0043433 | negative regulation of DNA-binding transcription factor activity                      | 23/1133 | 167/29008 | 1.6E-07  | 5.2E-06  | 3.48E-06 |
| GO:1901361 | BP | GO:1901361 | organic cyclic compound catabolic process                                             | 43/1133 | 463/29008 | 1.68E-07 | 5.42E-06 | 3.63E-06 |
| GO:0034101 | BP | GO:0034101 | erythrocyte homeostasis                                                               | 22/1133 | 155/29008 | 1.73E-07 | 5.55E-06 | 3.72E-06 |
| GO:1903364 | BP | GO:1903364 | positive regulation of cellular protein catabolic process                             | 21/1133 | 143/29008 | 1.83E-07 | 5.82E-06 | 3.9E-06  |
| GO:0001558 | BP | GO:0001558 | regulation of cell growth                                                             | 42/1133 | 450/29008 | 2.04E-07 | 6.46E-06 | 4.33E-06 |
| GO:0042113 | BP | GO:0042113 | B cell activation                                                                     | 41/1133 | 434/29008 | 2.06E-07 | 6.48E-06 | 4.34E-06 |
| GO:0002699 | BP | GO:0002699 | positive regulation of immune effector process                                        | 32/1133 | 296/29008 | 2.28E-07 | 7.14E-06 | 4.78E-06 |
| GO:0005004 | BP | GO:0005004 | protein-DNA complex assembly                                                          | 21/1133 | 145/29008 | 2.32E-07 | 7.19E-06 | 4.81E-06 |
| GO:0005086 | BP | GO:0005086 | negative regulation of mRNA processing                                                | 10/1133 | 32/29008  | 2.34E-07 | 7.19E-06 | 4.81E-06 |
| GO:0051085 | BP | GO:0051085 | chaperone cofactor-dependent protein refolding                                        | 10/1133 | 32/29008  | 2.34E-07 | 7.19E-06 | 4.81E-06 |
| GO:0045785 | BP | GO:0045785 | positive regulation of cell adhesion                                                  | 43/1133 | 471/29008 | 2.69E-07 | 8.23E-06 | 5.52E-06 |
| GO:0016601 | BP | GO:0016601 | Rac protein signal transduction                                                       | 12/1133 | 49/29008  | 2.88E-07 | 8.75E-06 | 5.86E-06 |
| GO:0005057 | BP | GO:0005057 | nucleic acid transport                                                                | 21/1133 | 147/29008 | 2.94E-07 | 8.83E-06 | 5.91E-06 |
| GO:0005058 | BP | GO:0005058 | RNA transport                                                                         | 21/1133 | 147/29008 | 2.94E-07 | 8.83E-06 | 5.91E-06 |
| GO:0017148 | BP | GO:0017148 | negative regulation of translation                                                    | 24/1133 | 186/29008 | 2.99E-07 | 8.92E-06 | 5.98E-06 |
| GO:0046634 | BP | GO:0046634 | regulation of alpha-beta T cell activation                                            | 18/1133 | 111/29008 | 3E-07    | 8.92E-06 | 5.98E-06 |
| GO:0031398 | BP | GO:0031398 | positive regulation of protein ubiquitination                                         | 19/1133 | 123/29008 | 3.11E-07 | 9.18E-06 | 6.15E-06 |
| GO:0052547 | BP | GO:0052547 | regulation of peptidase activity                                                      | 41/1133 | 441/29008 | 3.15E-07 | 9.25E-06 | 6.2E-06  |
| GO:0001666 | BP | GO:0001666 | response to hypoxia                                                                   | 26/1133 | 214/29008 | 3.24E-07 | 9.47E-06 | 6.34E-06 |
| GO:0009755 | BP | GO:0009755 | hormone-mediated signaling pathway                                                    | 22/1133 | 161/29008 | 3.4E-07  | 9.89E-06 | 6.62E-06 |
| GO:0007519 | BP | GO:0007519 | skeletal muscle tissue development                                                    | 25/1133 | 201/29008 | 3.47E-07 | 1E-05    | 6.72E-06 |
| GO:0046626 | BP | GO:0046626 | regulation of insulin receptor signaling pathway                                      | 15/1133 | 79/29008  | 3.54E-07 | 1.02E-05 | 6.81E-06 |
| GO:0017038 | BP | GO:0017038 | protein import                                                                        | 27/1133 | 229/29008 | 3.56E-07 | 1.02E-05 | 6.81E-06 |
| GO:0019083 | BP | GO:0019083 | viral transcription                                                                   | 12/1133 | 50/29008  | 3.66E-07 | 1.03E-05 | 6.89E-06 |
| GO:0043618 | BP | GO:0043618 | regulation of transcription from RNA polymerase II promoter in response to stress     | 12/1133 | 50/29008  | 3.66E-07 | 1.03E-05 | 6.89E-06 |
| GO:0006064 | BP | GO:0006064 | regulation of gene silencing by miRNA                                                 | 12/1133 | 50/29008  | 3.66E-07 | 1.03E-05 | 6.89E-06 |
| GO:0032481 | BP | GO:0032481 | positive regulation of type I interferon production                                   | 14/1133 | 69/29008  | 3.69E-07 | 1.03E-05 | 6.91E-06 |
| GO:2000058 | BP | GO:2000058 | regulation of ubiquitin-dependent protein catabolic process                           | 22/1133 | 162/29008 | 3.79E-07 | 1.06E-05 | 7.08E-06 |
| GO:0001933 | BP | GO:0001933 | negative regulation of protein phosphorylation                                        | 35/1133 | 349/29008 | 3.9E-07  | 1.08E-05 | 7.24E-06 |
| GO:0051348 | BP | GO:0051348 | negative regulation of transferase activity                                           | 29/1133 | 259/29008 | 3.99E-07 | 1.1E-05  | 7.37E-06 |
| GO:0043409 | BP | GO:0043409 | negative regulation of MAPK cascade                                                   | 24/1133 | 189/29008 | 4.04E-07 | 1.11E-05 | 7.41E-06 |
| GO:0051236 | BP | GO:0051236 | establishment of RNA localization                                                     | 21/1133 | 150/29008 | 4.15E-07 | 1.13E-05 | 7.58E-06 |
| GO:0031668 | BP | GO:0031668 | cellular response to extracellular stimulus                                           | 27/1133 | 231/29008 | 4.23E-07 | 1.15E-05 | 7.7E-06  |
| GO:0005082 | BP | GO:0005082 | protein stabilization                                                                 | 24/1133 | 190/29008 | 4.45E-07 | 1.2E-05  | 8.05E-06 |
| GO:0002831 | BP | GO:0002831 | regulation of response to biotic stimulus                                             | 34/1133 | 337/29008 | 4.95E-07 | 1.33E-05 | 8.91E-06 |
| GO:0032922 | BP | GO:0032922 | circadian regulation of gene expression                                               | 14/1133 | 71/29008  | 5.34E-07 | 1.43E-05 | 9.56E-06 |
| GO:0050777 | BP | GO:0050777 | negative regulation of immune response                                                | 25/1133 | 206/29008 | 5.54E-07 | 1.47E-05 | 9.87E-06 |
| GO:0022411 | BP | GO:0022411 | cellular component disassembly                                                        | 38/1133 | 402/29008 | 5.6E-07  | 1.47E-05 | 9.88E-06 |
| GO:0006984 | BP | GO:0006984 | ER-nucleus signaling pathway                                                          | 11/1133 | 43/29008  | 5.6E-07  | 1.47E-05 | 9.88E-06 |
| GO:0031497 | BP | GO:0031497 | chromatin assembly                                                                    | 17/1133 | 104/29008 | 5.67E-07 | 1.48E-05 | 9.95E-06 |
| GO:0033674 | BP | GO:0033674 | positive regulation of kinase activity                                                | 40/1133 | 435/29008 | 5.8E-07  | 1.51E-05 | 1.01E-05 |
| GO:0042098 | BP | GO:0042098 | T cell proliferation                                                                  | 26/1133 | 221/29008 | 6.07E-07 | 1.58E-05 | 1.06E-05 |
| GO:0005057 | BP | GO:0005057 | muscle tissue development                                                             | 43/1133 | 486/29008 | 6.29E-07 | 1.62E-05 | 1.09E-05 |
| GO:0002287 | BP | GO:0002287 | alpha-beta T cell activation involved in immune response                              | 14/1133 | 72/29008  | 6.39E-07 | 1.63E-05 | 1.09E-05 |
| GO:0098586 | BP | GO:0098586 | cellular response to virus                                                            | 14/1133 | 72/29008  | 6.39E-07 | 1.63E-05 | 1.09E-05 |
| GO:0071456 | BP | GO:0071456 | cellular response to hypoxia                                                          | 17/1133 | 105/29008 | 6.52E-07 | 1.66E-05 | 1.11E-05 |
| GO:0043558 | BP | GO:0043558 | regulation of translational initiation in response to stress                          | 7/1133  | 15/29008  | 6.65E-07 | 1.68E-05 | 1.13E-05 |
| GO:0009895 | BP | GO:0009895 | negative regulation of catabolic process                                              | 32/1133 | 311/29008 | 6.91E-07 | 1.74E-05 | 1.17E-05 |
| GO:0001047 | BP | GO:0001047 | regulation of posttranscriptional gene silencing                                      | 12/1133 | 53/29008  | 7.21E-07 | 1.81E-05 | 1.21E-05 |
| GO:0005086 | BP | GO:0005086 | negative regulation of cell activation                                                | 26/1133 | 223/29008 | 7.23E-07 | 1.81E-05 | 1.21E-05 |
| GO:0042255 | BP | GO:0042255 | ribosome assembly                                                                     | 13/1133 | 63/29008  | 7.83E-07 | 1.94E-05 | 1.3E-05  |
| GO:0002262 | BP | GO:0002262 | myeloid cell homeostasis                                                              | 24/1133 | 196/29008 | 7.88E-07 | 1.94E-05 | 1.3E-05  |
| GO:0034612 | BP | GO:0034612 | response to tumor necrosis factor                                                     | 24/1133 | 196/29008 | 7.88E-07 | 1.94E-05 | 1.3E-05  |
| GO:0030218 | BP | GO:0030218 | erythrocyte differentiation                                                           | 20/1133 | 143/29008 | 7.9E-07  | 1.94E-05 | 1.3E-05  |
| GO:0007517 | BP | GO:0007517 | muscle organ development                                                              | 35/1133 | 360/29008 | 8.1E-07  | 1.97E-05 | 1.32E-05 |
| GO:0006612 | BP | GO:0006612 | protein targeting to membrane                                                         | 18/1133 | 119/29008 | 8.68E-07 | 2.1E-05  | 1.41E-05 |
| GO:0018107 | BP | GO:0018107 | peptidyl-threonine phosphorylation                                                    | 18/1133 | 119/29008 | 8.68E-07 | 2.1E-05  | 1.41E-05 |
| GO:2001235 | BP | GO:2001235 | positive regulation of apoptotic signaling pathway                                    | 21/1133 | 157/29008 | 8.94E-07 | 2.14E-05 | 1.43E-05 |
| GO:0009066 | BP | GO:0009066 | regulation of gene silencing by RNA                                                   | 12/1133 | 54/29008  | 8.94E-07 | 2.14E-05 | 1.43E-05 |
| GO:0016051 | BP | GO:0016051 | carbohydrate biosynthetic process                                                     | 24/1133 | 198/29008 | 9.49E-07 | 2.25E-05 | 1.51E-05 |
| GO:0031060 | BP | GO:0031060 | regulation of histone methylation                                                     | 15/1133 | 85/29008  | 9.49E-07 | 2.25E-05 | 1.51E-05 |
| GO:0006038 | BP | GO:0006038 | skeletal muscle organ development                                                     | 25/1133 | 212/29008 | 9.51E-07 | 2.25E-05 | 1.51E-05 |
| GO:0014706 | BP | GO:0014706 | striated muscle tissue development                                                    | 41/1133 | 461/29008 | 9.99E-07 | 2.35E-05 | 1.57E-05 |
| GO:0072659 | BP | GO:0072659 | protein localization to plasma membrane                                               | 31/1133 | 301/29008 | 1.01E-06 | 2.36E-05 | 1.58E-05 |
| GO:0031669 | BP | GO:0031669 | cellular response to nutrient levels                                                  | 24/1133 | 199/29008 | 1.04E-06 | 2.42E-05 | 1.62E-05 |
| GO:0006458 | BP | GO:0006458 | 'de novo' protein folding                                                             | 10/1133 | 37/29008  | 1.06E-06 | 2.44E-05 | 1.64E-05 |
| GO:0051084 | BP | GO:0051084 | 'de novo' posttranslational protein folding                                           | 10/1133 | 37/29008  | 1.06E-06 | 2.44E-05 | 1.64E-05 |
| GO:0062197 | BP | GO:0062197 | cellular response to chemical stress                                                  | 33/1133 | 333/29008 | 1.08E-06 | 2.49E-05 | 1.67E-05 |
| GO:0019058 | BP | GO:0019058 | viral life cycle                                                                      | 28/1133 | 257/29008 | 1.09E-06 | 2.49E-05 | 1.67E-05 |
| GO:0034250 | BP | GO:0034250 | positive regulation of cellular amide metabolic process                               | 21/1133 | 159/29008 | 1.1E-06  | 2.49E-05 | 1.67E-05 |
| GO:0051098 | BP | GO:0051098 | regulation of binding                                                                 | 37/1133 | 397/29008 | 1.1E-06  | 2.49E-05 | 1.67E-05 |
| GO:0071900 | BP | GO:0071900 | regulation of protein serine/threonine kinase activity                                | 34/1133 | 349/29008 | 1.11E-06 | 2.49E-05 | 1.67E-05 |
| GO:0050779 | BP | GO:0050779 | RNA destabilization                                                                   | 15/1133 | 86/29008  | 1.11E-06 | 2.49E-05 | 1.67E-05 |
| GO:0061014 | BP | GO:0061014 | positive regulation of mRNA catabolic process                                         | 15/1133 | 86/29008  | 1.11E-06 | 2.49E-05 | 1.67E-05 |
| GO:0002695 | BP | GO:0002695 | negative regulation of leukocyte activation                                           | 24/1133 | 200/29008 | 1.14E-06 | 2.53E-05 | 1.7E-05  |
| GO:0046578 | BP | GO:0046578 | regulation of Ras protein signal transduction                                         | 24/1133 | 200/29008 | 1.14E-06 | 2.53E-05 | 1.7E-05  |
| GO:0000245 | BP | GO:0000245 | spliceosomal complex assembly                                                         | 11/1133 | 46/29008  | 1.17E-06 | 2.59E-05 | 1.73E-05 |
| GO:0022409 | BP | GO:0022409 | positive regulation of cell-cell adhesion                                             | 30/1133 | 288/29008 | 1.18E-06 | 2.61E-05 | 1.75E-05 |
| GO:0050852 | BP | GO:0050852 | T cell receptor signaling pathway                                                     | 19/1133 | 134/29008 | 1.2E-06  | 2.62E-05 | 1.76E-05 |
| GO:0006403 | BP | GO:0006403 | RNA localization                                                                      | 22/1133 | 174/29008 | 1.31E-06 | 2.63E-05 | 1.9E-05  |
| GO:0050792 | BP | GO:0050792 | regulation of viral process                                                           | 22/1133 | 174/29008 | 1.31E-06 | 2.63E-05 | 1.9E-05  |
| GO:0071356 | BP | GO:0071356 | cellular response to tumor necrosis factor                                            | 22/1133 | 174/29008 | 1        |          |          |

|            |    |            |                                                                                        |         |           |          |           |          |
|------------|----|------------|----------------------------------------------------------------------------------------|---------|-----------|----------|-----------|----------|
| GO:0097191 | BP | GO:0097191 | extrinsic apoptotic signaling pathway                                                  | 26/1133 | 238/29008 | 2.48E-06 | 4.79E-05  | 3.21E-05 |
| GO:0006260 | BP | GO:0006260 | DNA replication                                                                        | 27/1133 | 253/29008 | 2.51E-06 | 4.82E-05  | 3.23E-05 |
| GO:0061136 | BP | GO:0061136 | regulation of proteasomal protein catabolic process                                    | 22/1133 | 181/29008 | 2.54E-06 | 4.83E-05  | 3.23E-05 |
| GO:0015931 | BP | GO:0015931 | nucleobase-containing compound transport                                               | 23/1133 | 195/29008 | 2.54E-06 | 4.83E-05  | 3.23E-05 |
| GO:0030511 | BP | GO:0030511 | positive regulation of transforming growth factor beta receptor signaling pathway      | 9/1133  | 32/29008  | 2.55E-06 | 4.83E-05  | 3.23E-05 |
| GO:1903846 | BP | GO:1903846 | positive regulation of cellular response to transforming growth factor beta stimulus   | 9/1133  | 32/29008  | 2.55E-06 | 4.83E-05  | 3.23E-05 |
| GO:0010998 | BP | GO:0010998 | regulation of translational initiation by eIF2 alpha phosphorylation                   | 6/1133  | 12/29008  | 2.64E-06 | 4.99E-05  | 3.34E-05 |
| GO:0022294 | BP | GO:0022294 | CD4-positive, alpha-beta T cell differentiation involved in immune response            | 13/1133 | 70/29008  | 2.75E-06 | 5.18E-05  | 3.47E-05 |
| GO:0027111 | BP | GO:0027111 | positive regulation of T cell mediated immunity                                        | 14/1133 | 81/29008  | 2.81E-06 | 5.27E-05  | 3.53E-05 |
| GO:0006323 | BP | GO:0006323 | DNA packaging                                                                          | 20/1133 | 155/29008 | 2.85E-06 | 5.31E-05  | 3.56E-05 |
| GO:0046632 | BP | GO:0046632 | alpha-beta T cell differentiation                                                      | 18/1133 | 129/29008 | 2.87E-06 | 5.34E-05  | 3.57E-05 |
| GO:1903039 | BP | GO:1903039 | positive regulation of leukocyte cell-cell adhesion                                    | 26/1133 | 240/29008 | 2.9E-06  | 5.38E-05  | 3.6E-05  |
| GO:0006474 | BP | GO:0006474 | N-terminal protein amino acid acetylation                                              | 7/1133  | 18/29008  | 2.97E-06 | 5.48E-05  | 3.67E-05 |
| GO:0033673 | BP | GO:0033673 | negative regulation of kinase activity                                                 | 25/1133 | 228/29008 | 3.07E-06 | 5.66E-05  | 3.79E-05 |
| GO:0034599 | BP | GO:0034599 | cellular response to oxidative stress                                                  | 28/1133 | 271/29008 | 3.11E-06 | 5.7E-05   | 3.82E-05 |
| GO:0036293 | BP | GO:0036293 | response to decreased oxygen levels                                                    | 26/1133 | 241/29008 | 3.13E-06 | 5.73E-05  | 3.84E-05 |
| GO:0032200 | BP | GO:0032200 | telomere organization                                                                  | 18/1133 | 130/29008 | 3.21E-06 | 5.85E-05  | 3.92E-05 |
| GO:0022293 | BP | GO:0022293 | alpha-beta T cell differentiation involved in immune response                          | 13/1133 | 71/29008  | 3.25E-06 | 5.9E-05   | 3.95E-05 |
| GO:0006334 | BP | GO:0006334 | nucleosome assembly                                                                    | 14/1133 | 82/29008  | 3.27E-06 | 5.9E-05   | 3.95E-05 |
| GO:0061157 | BP | GO:0061157 | mRNA destabilization                                                                   | 14/1133 | 82/29008  | 3.27E-06 | 5.9E-05   | 3.95E-05 |
| GO:0051235 | BP | GO:0051235 | maintenance of location                                                                | 32/1133 | 335/29008 | 3.44E-06 | 6.18E-05  | 4.14E-05 |
| GO:0022604 | BP | GO:0022604 | regulation of cell morphogenesis                                                       | 32/1133 | 337/29008 | 3.9E-06  | 6.98E-05  | 4.68E-05 |
| GO:1903038 | BP | GO:1903038 | negative regulation of leukocyte cell-cell adhesion                                    | 19/1133 | 145/29008 | 3.98E-06 | 7.1E-05   | 4.75E-05 |
| GO:0071559 | BP | GO:0071559 | response to transforming growth factor beta                                            | 25/1133 | 230/29008 | 4.21E-06 | 7.49E-05  | 5.02E-05 |
| GO:0032944 | BP | GO:0032944 | regulation of mononuclear cell proliferation                                           | 26/1133 | 245/29008 | 4.24E-06 | 7.52E-05  | 5.04E-05 |
| GO:0043255 | BP | GO:0043255 | regulation of carbohydrate biosynthetic process                                        | 16/1133 | 108/29008 | 4.59E-06 | 8.11E-05  | 5.43E-05 |
| GO:0002253 | BP | GO:0002253 | activation of immune response                                                          | 38/1133 | 439/29008 | 4.65E-06 | 8.19E-05  | 5.49E-05 |
| GO:1901990 | BP | GO:1901990 | regulation of mitotic cell cycle phase transition                                      | 29/1133 | 293/29008 | 4.89E-06 | 8.58E-05  | 5.75E-05 |
| GO:0071103 | BP | GO:0071103 | DNA conformation change                                                                | 23/1133 | 203/29008 | 5.04E-06 | 8.82E-05  | 5.91E-05 |
| GO:0045861 | BP | GO:0045861 | negative regulation of proteolysis                                                     | 33/1133 | 358/29008 | 5.23E-06 | 9.12E-05  | 6.11E-05 |
| GO:0031098 | BP | GO:0031098 | stress-activated protein kinase signaling cascade                                      | 26/1133 | 248/29008 | 5.3E-06  | 9.21E-05  | 6.17E-05 |
| GO:2001056 | BP | GO:2001056 | positive regulation of cysteine-type endopeptidase activity                            | 19/1133 | 148/29008 | 5.4E-06  | 9.35E-05  | 6.26E-05 |
| GO:0071496 | BP | GO:0071496 | cellular response to external stimulus                                                 | 29/1133 | 295/29008 | 5.58E-06 | 9.64E-05  | 6.46E-05 |
| GO:0000462 | BP | GO:0000462 | maturation of SSU-rRNA from tricistronic rRNA transcript (SSU-rRNA, 5.8S rRNA, LSU     | 9/1133  | 35/29008  | 5.78E-06 | 9.95E-05  | 6.66E-05 |
| GO:0043491 | BP | GO:0043491 | protein kinase B signaling                                                             | 23/1133 | 205/29008 | 5.95E-06 | 0.0001011 | 6.83E-05 |
| GO:0034063 | BP | GO:0034063 | stress granule assembly                                                                | 8/1133  | 27/29008  | 6.04E-06 | 0.0001030 | 6.92E-05 |
| GO:0042692 | BP | GO:0042692 | muscle cell differentiation                                                            | 37/1133 | 428/29008 | 6.37E-06 | 0.000106  | 7.27E-05 |
| GO:0022408 | BP | GO:0022408 | negative regulation of cell-cell adhesion                                              | 23/1133 | 206/29008 | 6.45E-06 | 0.000109  | 7.34E-05 |
| GO:0045638 | BP | GO:0045638 | negative regulation of myeloid cell differentiation                                    | 14/1133 | 87/29008  | 6.71E-06 | 0.000113  | 7.61E-05 |
| GO:0034968 | BP | GO:0034968 | histone lysine methylation                                                             | 17/1133 | 124/29008 | 6.85E-06 | 0.000115  | 7.74E-05 |
| GO:0007623 | BP | GO:0007623 | circadian rhythm                                                                       | 24/1133 | 222/29008 | 7.14E-06 | 0.000119  | 8.03E-05 |
| GO:0016236 | BP | GO:0016236 | macroautophagy                                                                         | 24/1133 | 222/29008 | 7.14E-06 | 0.000119  | 8.03E-05 |
| GO:0043547 | BP | GO:0043547 | positive regulation of GTPase activity                                                 | 25/1133 | 237/29008 | 7.17E-06 | 0.000119  | 8.03E-05 |
| GO:0071346 | BP | GO:0071346 | cellular response to interferon-gamma                                                  | 16/1133 | 112/29008 | 7.42E-06 | 0.000123  | 8.28E-05 |
| GO:0051403 | BP | GO:0051403 | stress-activated MAPK cascade                                                          | 25/1133 | 238/29008 | 7.72E-06 | 0.000128  | 8.59E-05 |
| GO:0006470 | BP | GO:0006470 | protein dephosphorylation                                                              | 25/1133 | 239/29008 | 8.3E-06  | 0.000137  | 9.21E-05 |
| GO:0043254 | BP | GO:0043254 | regulation of protein-containing complex assembly                                      | 38/1133 | 451/29008 | 8.66E-06 | 0.000143  | 9.58E-05 |
| GO:2001243 | BP | GO:2001243 | negative regulation of intrinsic apoptotic signaling pathway                           | 15/1133 | 101/29008 | 8.77E-06 | 0.000144  | 9.67E-05 |
| GO:0008631 | BP | GO:0008631 | intrinsic apoptotic signaling pathway in response to oxidative stress                  | 10/1133 | 46/29008  | 8.98E-06 | 0.000146  | 9.84E-05 |
| GO:0051898 | BP | GO:0051898 | negative regulation of protein kinase B signaling                                      | 10/1133 | 46/29008  | 8.98E-06 | 0.000146  | 9.84E-05 |
| GO:0002292 | BP | GO:0002292 | T cell differentiation involved in immune response                                     | 13/1133 | 78/29008  | 9.59E-06 | 0.000156  | 0.000104 |
| GO:0050670 | BP | GO:0050670 | regulation of lymphocyte proliferation                                                 | 25/1133 | 241/29008 | 9.6E-06  | 0.000156  | 0.000104 |
| GO:0007163 | BP | GO:0007163 | establishment or maintenance of cell polarity                                          | 24/1133 | 226/29008 | 9.68E-06 | 0.000156  | 0.000104 |
| GO:0071560 | BP | GO:0071560 | cellular response to transforming growth factor beta stimulus                          | 24/1133 | 226/29008 | 9.68E-06 | 0.000156  | 0.000104 |
| GO:0039531 | BP | GO:0039531 | regulation of viral-induced cytoplasmic pattern recognition receptor signaling pathway | 7/1133  | 21/29008  | 9.78E-06 | 0.000156  | 0.000104 |
| GO:0043555 | BP | GO:0043555 | regulation of translation in response to stress                                        | 7/1133  | 21/29008  | 9.78E-06 | 0.000156  | 0.000104 |
| GO:2001236 | BP | GO:2001236 | regulation of extrinsic apoptotic signaling pathway                                    | 20/1133 | 168/29008 | 9.79E-06 | 0.000156  | 0.000104 |
| GO:0051817 | BP | GO:0051817 | modulation of process of other organism involved in symbiotic interaction              | 12/1133 | 67/29008  | 9.8E-06  | 0.000156  | 0.000104 |
| GO:1902105 | BP | GO:1902105 | regulation of leukocyte differentiation                                                | 30/1133 | 320/29008 | 9.93E-06 | 0.000158  | 0.000105 |
| GO:0031365 | BP | GO:0031365 | N-terminal protein amino acid modification                                             | 8/1133  | 29/29008  | 1.09E-05 | 0.000172  | 0.000115 |
| GO:0090502 | BP | GO:0090502 | RNA phosphodiester bond hydrolysis, endonucleolytic                                    | 8/1133  | 29/29008  | 1.09E-05 | 0.000172  | 0.000115 |
| GO:0006094 | BP | GO:0006094 | gluconeogenesis                                                                        | 13/1133 | 79/29008  | 1.11E-05 | 0.000174  | 0.000116 |
| GO:0033143 | BP | GO:0033143 | regulation of intracellular steroid hormone receptor signaling pathway                 | 13/1133 | 79/29008  | 1.11E-05 | 0.000174  | 0.000116 |
| GO:0008361 | BP | GO:0008361 | regulation of cell size                                                                | 23/1133 | 213/29008 | 1.12E-05 | 0.000175  | 0.000117 |
| GO:0046034 | BP | GO:0046034 | ATP metabolic process                                                                  | 26/1133 | 259/29008 | 1.16E-05 | 0.000180  | 0.000121 |
| GO:0044770 | BP | GO:0044770 | cell cycle phase transition                                                            | 40/1133 | 492/29008 | 1.18E-05 | 0.000183  | 0.000123 |
| GO:1905475 | BP | GO:1905475 | regulation of protein localization to membrane                                         | 22/1133 | 199/29008 | 1.19E-05 | 0.000184  | 0.000123 |
| GO:0044772 | BP | GO:0044772 | mitotic cell cycle phase transition                                                    | 35/1133 | 406/29008 | 1.19E-05 | 0.000184  | 0.000123 |
| GO:0048511 | BP | GO:0048511 | rhythmic process                                                                       | 29/1133 | 307/29008 | 1.2E-05  | 0.000185  | 0.000124 |
| GO:0006979 | BP | GO:0006979 | response to oxidative stress                                                           | 35/1133 | 407/29008 | 1.26E-05 | 0.000193  | 0.000129 |
| GO:0000478 | BP | GO:0000478 | endonucleolytic cleavage involved in rRNA processing                                   | 6/1133  | 15/29008  | 1.29E-05 | 0.000197  | 0.000132 |
| GO:0000479 | BP | GO:0000479 | endonucleolytic cleavage of tricistronic rRNA transcript (SSU-rRNA, 5.8S rRNA, LSU     | 6/1133  | 15/29008  | 1.29E-05 | 0.000197  | 0.000132 |
| GO:0043923 | BP | GO:0043923 | positive regulation by host of viral transcription                                     | 6/1133  | 15/29008  | 1.29E-05 | 0.000197  | 0.000132 |
| GO:1900153 | BP | GO:1900153 | positive regulation of nuclear-transcribed mRNA catabolic process, deadenylation-cl    | 6/1133  | 15/29008  | 1.29E-05 | 0.000197  | 0.000132 |
| GO:0038294 | BP | GO:0038294 | cellular response to decreased oxygen levels                                           | 17/1133 | 130/29008 | 1.3E-05  | 0.000197  | 0.000132 |
| GO:0043367 | BP | GO:0043367 | CD4-positive, alpha-beta T cell differentiation                                        | 14/1133 | 92/29008  | 1.3E-05  | 0.000197  | 0.000132 |
| GO:0070663 | BP | GO:0070663 | regulation of leukocyte proliferation                                                  | 26/1133 | 261/29008 | 1.32E-05 | 0.000200  | 0.000134 |
| GO:0150116 | BP | GO:0150116 | regulation of cell-substrate junction organization                                     | 12/1133 | 69/29008  | 1.34E-05 | 0.000201  | 0.000135 |
| GO:0050856 | BP | GO:0050856 | regulation of T cell receptor signaling pathway                                        | 10/1133 | 48/29008  | 1.34E-05 | 0.000201  | 0.000135 |
| GO:0007179 | BP | GO:0007179 | transforming growth factor beta receptor signaling pathway                             | 21/1133 | 186/29008 | 1.35E-05 | 0.000202  | 0.000135 |
| GO:1903829 | BP | GO:1903829 | positive regulation of cellular protein localization                                   | 27/1133 | 277/29008 | 1.35E-05 | 0.000202  | 0.000135 |
| GO:0050870 | BP | GO:0050870 | positive regulation of T cell activation                                               | 23/1133 | 216/29008 | 1.41E-05 | 0.000209  | 0.000140 |
| GO:0050868 | BP | GO:0050868 | negative regulation of T cell activation                                               | 17/1133 | 131/29008 | 1.44E-05 | 0.000213  | 0.000143 |
| GO:0007162 | BP | GO:0007162 | negative regulation of cell adhesion                                                   | 29/1133 | 310/29008 | 1.45E-05 | 0.000214  | 0.000143 |
| GO:0007346 | BP | GO:0007346 | regulation of mitotic cell cycle                                                       | 38/1133 | 462/29008 | 1.49E-05 | 0.000220  | 0.000147 |
| GO:0032946 | BP | GO:0032946 | positive regulation of mononuclear cell proliferation                                  | 18/1133 | 145/29008 | 1.51E-05 | 0.000221  | 0.000148 |
| GO:0072331 | BP | GO:0072331 | signal transduction by p53 class mediator                                              | 18/1133 | 145/29008 | 1.51E-05 | 0.000221  | 0.000148 |
| GO:0051896 | BP | GO:0051896 | regulation of protein kinase B signaling                                               | 20/1133 | 173/29008 | 1.52E-05 | 0.000222  | 0.000148 |
| GO:0000381 | BP | GO:0000381 | regulation of alternative mRNA splicing, via spliceosome                               | 11/1133 | 59/29008  | 1.54E-05 | 0.000224  | 0.000150 |
| GO:1901987 | BP | GO:1901987 | regulation of cell cycle phase transition                                              | 33/1133 | 378/29008 | 1.62E-05 | 0.000235  | 0.000158 |
| GO:0042149 | BP | GO:0042149 | cellular response to glucose starvation                                                | 10/1133 | 49/29008  | 1.63E-05 | 0.000236  | 0.000158 |
| GO:1900138 | BP | GO:1900138 | neuron projection extension                                                            | 22/1133 | 203/29008 | 1.63E-05 | 0.000236  | 0.000158 |
| GO:0071453 | BP | GO:0071453 | cellular response to oxygen levels                                                     | 18/1133 | 146/29008 | 1.66E-05 | 0.000240  | 0.000160 |
| GO:0008625 | BP | GO:0008625 | extrinsic apoptotic signaling pathway via death domain receptors                       | 13/1133 | 82/29008  | 1.68E-05 | 0.000241  | 0.000161 |
| GO:0019319 | BP | GO:0019319 | hexose biosynthetic process                                                            | 13/1133 | 82/29008  | 1.68E-05 | 0.000241  | 0.000161 |
| GO:0009314 | BP | GO:0009314 | response to radiation                                                                  | 36/1133 | 430/29008 | 1.7E-05  | 0.000243  | 0.000163 |
| GO:0010212 | BP | GO:0010212 | response to ionizing radiation                                                         | 17/1133 | 133/29008 | 1.78E-05 | 0.000258  | 0.000167 |
| GO:0032434 | BP | GO:0032434 | regulation of proteasomal ubiquitin-dependent protein catabolic process                | 17/1133 | 133/29008 | 1.78E-05 | 0.000258  | 0.000167 |
| GO:0019221 | BP | GO:0019221 | cytokine-mediated signaling pathway                                                    | 34/1133 | 397/29008 | 1.81E-05 | 0.000257  | 0.000172 |
| GO:0006406 | BP | GO:0006406 | mRNA export from nucleus                                                               | 11/1133 | 60/29008  | 1.82E-05 | 0.000257  | 0.000172 |
| GO:0071427 | BP | GO:0071427 | mRNA-containing ribonucleoprotein complex export from nucleus                          | 11/1133 | 60/29008  | 1.82E-05 | 0.000257  | 0.000172 |
| GO:2000637 | BP | GO:2000637 | positive regulation of gene silencing by miRNA                                         | 8/1133  | 31/29008  | 1.87E-05 | 0.000263  | 0.000176 |
| GO:0051651 | BP | GO:0051651 | maintenance of location in cell                                                        | 23/1133 | 220/29008 | 1.9E-05  | 0.000266  | 0.000178 |
| GO:0033120 | BP | GO:0033120 | positive regulation of RNA splicing                                                    | 10/1133 | 50/29008  | 1.96E-05 | 0.000275  | 0.000184 |
| GO:0032970 | BP | GO:0032970 | regulation of actin filament-based process                                             | 35/1133 | 416/29008 | 1.99E-05 | 0.000278  | 0.000186 |
| GO:0031348 | BP | GO:0031348 | negative regulation of defense response                                                | 24/1133 | 236/29008 | 2E-05    | 0.000278  | 0.000186 |
| GO:0030307 | BP | GO:0030307 | positive regulation of cell growth                                                     | 22/1133 | 206/29008 | 2.       |           |          |

|            |    |            |                                                                                     |        |           |          |          |          |
|------------|----|------------|-------------------------------------------------------------------------------------|--------|-----------|----------|----------|----------|
| GO:0070534 | BP | GO:0070534 | protein K63-linked ubiquitination                                                   | 11/133 | 64/29008  | 3.42E-05 | 0.000438 | 0.000293 |
| GO:0032680 | BP | GO:0032680 | regulation of tumor necrosis factor production                                      | 20/133 | 183/29008 | 3.45E-05 | 0.000439 | 0.000294 |
| GO:1901343 | BP | GO:1901343 | negative regulation of vasculature development                                      | 15/133 | 113/29008 | 3.45E-05 | 0.000439 | 0.000294 |
| GO:0002460 | BP | GO:0002460 | adaptive immune response based on somatic recombination of immune receptors b       | 38/133 | 480/29008 | 3.45E-05 | 0.000439 | 0.000294 |
| GO:0032872 | BP | GO:0032872 | regulation of stress-activated MAPK cascade                                         | 21/133 | 198/29008 | 3.48E-05 | 0.000441 | 0.000295 |
| GO:0046633 | BP | GO:0046633 | alpha-beta T cell proliferation                                                     | 9/133  | 43/29008  | 3.48E-05 | 0.000441 | 0.000295 |
| GO:0010950 | BP | GO:0010950 | positive regulation of endopeptidase activity                                       | 19/133 | 169/29008 | 3.63E-05 | 0.000458 | 0.000307 |
| GO:0051101 | BP | GO:0051101 | regulation of DNA binding                                                           | 16/133 | 127/29008 | 3.69E-05 | 0.000464 | 0.000311 |
| GO:0018022 | BP | GO:0018022 | peptidyl-lysine methylation                                                         | 17/133 | 141/29008 | 3.77E-05 | 0.000474 | 0.000317 |
| GO:0051702 | BP | GO:0051702 | biological process involved in interaction with symbiont                            | 15/133 | 114/29008 | 3.83E-05 | 0.000480 | 0.000321 |
| GO:0006111 | BP | GO:0006111 | regulation of gluconeogenesis                                                       | 10/133 | 54/29008  | 3.97E-05 | 0.000495 | 0.000332 |
| GO:0043331 | BP | GO:0043331 | response to dsRNA                                                                   | 11/133 | 65/29008  | 3.97E-05 | 0.000495 | 0.000332 |
| GO:0046364 | BP | GO:0046364 | monosaccharide biosynthetic process                                                 | 13/133 | 89/29008  | 4.11E-05 | 0.000512 | 0.000343 |
| GO:0061458 | BP | GO:0061458 | reproductive system development                                                     | 38/133 | 484/29008 | 4.13E-05 | 0.000513 | 0.000343 |
| GO:0016579 | BP | GO:0016579 | protein deubiquitination                                                            | 15/133 | 115/29008 | 4.25E-05 | 0.000526 | 0.000352 |
| GO:0006352 | BP | GO:0006352 | DNA-templated transcription, initiation                                             | 14/133 | 102/29008 | 4.29E-05 | 0.000526 | 0.000352 |
| GO:0048525 | BP | GO:0048525 | negative regulation of viral process                                                | 14/133 | 102/29008 | 4.29E-05 | 0.000526 | 0.000352 |
| GO:0150115 | BP | GO:0150115 | cell-substrate junction organization                                                | 14/133 | 102/29008 | 4.29E-05 | 0.000526 | 0.000352 |
| GO:2000060 | BP | GO:2000060 | positive regulation of ubiquitin-dependent protein catabolic process                | 14/133 | 102/29008 | 4.29E-05 | 0.000526 | 0.000352 |
| GO:0030575 | BP | GO:0030575 | nuclear body organization                                                           | 6/133  | 18/29008  | 4.34E-05 | 0.000527 | 0.000353 |
| GO:0039535 | BP | GO:0039535 | regulation of RIG-I signaling pathway                                               | 6/133  | 18/29008  | 4.34E-05 | 0.000527 | 0.000353 |
| GO:1900151 | BP | GO:1900151 | regulation of nuclear-transcribed mRNA catabolic process, deadenylation-dependen    | 6/133  | 18/29008  | 4.34E-05 | 0.000527 | 0.000353 |
| GO:0070302 | BP | GO:0070302 | regulation of stress-activated protein kinase signaling cascade                     | 21/133 | 201/29008 | 4.34E-05 | 0.000527 | 0.000353 |
| GO:0032388 | BP | GO:0032388 | positive regulation of intracellular transport                                      | 20/133 | 186/29008 | 4.35E-05 | 0.000527 | 0.000353 |
| GO:1903555 | BP | GO:1903555 | regulation of tumor necrosis factor superfamily cytokine production                 | 20/133 | 186/29008 | 4.35E-05 | 0.000527 | 0.000353 |
| GO:0070482 | BP | GO:0070482 | response to oxygen levels                                                           | 27/133 | 296/29008 | 4.37E-05 | 0.000528 | 0.000353 |
| GO:0070665 | BP | GO:0070665 | positive regulation of leukocyte proliferation                                      | 18/133 | 157/29008 | 4.45E-05 | 0.000536 | 0.000359 |
| GO:1901216 | BP | GO:1901216 | positive regulation of neuron death                                                 | 16/133 | 129/29008 | 4.47E-05 | 0.000537 | 0.000360 |
| GO:0050671 | BP | GO:0050671 | positive regulation of lymphocyte proliferation                                     | 17/133 | 143/29008 | 4.52E-05 | 0.000543 | 0.000363 |
| GO:0071478 | BP | GO:0071478 | cellular response to radiation                                                      | 19/133 | 172/29008 | 4.63E-05 | 0.000553 | 0.000370 |
| GO:0033233 | BP | GO:0033233 | regulation of protein sumoylation                                                   | 7/133  | 29/29008  | 4.66E-05 | 0.000553 | 0.000370 |
| GO:0035020 | BP | GO:0035020 | regulation of Rac protein signal transduction                                       | 7/133  | 29/29008  | 4.66E-05 | 0.000553 | 0.000370 |
| GO:0046685 | BP | GO:0046685 | response to arsenic-containing substance                                            | 7/133  | 29/29008  | 4.66E-05 | 0.000553 | 0.000370 |
| GO:0050857 | BP | GO:0050857 | positive regulation of antigen receptor-mediated signaling pathway                  | 7/133  | 29/29008  | 4.66E-05 | 0.000553 | 0.000370 |
| GO:0030308 | BP | GO:0030308 | negative regulation of cell growth                                                  | 21/133 | 202/29008 | 4.67E-05 | 0.000553 | 0.000370 |
| GO:0900068 | BP | GO:0900068 | positive regulation of cell cycle process                                           | 24/133 | 249/29008 | 4.78E-05 | 0.000563 | 0.000377 |
| GO:0006919 | BP | GO:0006919 | activation of cysteine-type endopeptidase activity involved in apoptotic process    | 12/133 | 78/29008  | 4.78E-05 | 0.000563 | 0.000377 |
| GO:0002698 | BP | GO:0002698 | negative regulation of immune effector process                                      | 16/133 | 130/29008 | 4.92E-05 | 0.000578 | 0.000387 |
| GO:0032640 | BP | GO:0032640 | tumor necrosis factor production                                                    | 20/133 | 188/29008 | 5.07E-05 | 0.000594 | 0.000398 |
| GO:0009637 | BP | GO:0009637 | apoptotic mitochondrial changes                                                     | 15/133 | 117/29008 | 5.21E-05 | 0.000610 | 0.000408 |
| GO:0045637 | BP | GO:0045637 | regulation of myeloid cell differentiation                                          | 22/133 | 219/29008 | 5.24E-05 | 0.000612 | 0.000410 |
| GO:0002821 | BP | GO:0002821 | positive regulation of adaptive immune response                                     | 18/133 | 159/29008 | 5.26E-05 | 0.000613 | 0.000410 |
| GO:0045727 | BP | GO:0045727 | positive regulation of translation                                                  | 16/133 | 131/29008 | 5.4E-05  | 0.000627 | 0.000420 |
| GO:0051091 | BP | GO:0051091 | positive regulation of DNA-binding transcription factor activity                    | 25/133 | 267/29008 | 5.41E-05 | 0.000627 | 0.000420 |
| GO:010594  | BP | GO:010594  | regulation of endothelial cell migration                                            | 19/133 | 174/29008 | 5.42E-05 | 0.000628 | 0.000421 |
| GO:0006405 | BP | GO:0006405 | RNA export from nucleus                                                             | 12/133 | 79/29008  | 5.44E-05 | 0.000629 | 0.000421 |
| GO:0018023 | BP | GO:0018023 | peptidyl-lysine trimethylation                                                      | 10/133 | 56/29008  | 5.51E-05 | 0.000635 | 0.000425 |
| GO:0036490 | BP | GO:0036490 | regulation of translation in response to endoplasmic reticulum stress               | 5/133  | 12/29008  | 5.67E-05 | 0.000651 | 0.000436 |
| GO:0097201 | BP | GO:0097201 | negative regulation of transcription from RNA polymerase II promoter in response to | 5/133  | 12/29008  | 5.67E-05 | 0.000651 | 0.000436 |
| GO:0043542 | BP | GO:0043542 | endothelial cell migration                                                          | 22/133 | 221/29008 | 6.01E-05 | 0.000687 | 0.000460 |
| GO:0048639 | BP | GO:0048639 | positive regulation of developmental growth                                         | 22/133 | 221/29008 | 6.01E-05 | 0.000687 | 0.000460 |
| GO:0002289 | BP | GO:0002289 | nuclear-transcribed mRNA poly(A) tail shortening                                    | 7/133  | 27/29008  | 6.08E-05 | 0.000691 | 0.000462 |
| GO:0000469 | BP | GO:0000469 | cleavage involved in rRNA processing                                                | 7/133  | 27/29008  | 6.08E-05 | 0.000691 | 0.000462 |
| GO:0006376 | BP | GO:0006376 | mRNA splice site selection                                                          | 7/133  | 27/29008  | 6.08E-05 | 0.000691 | 0.000462 |
| GO:1900076 | BP | GO:1900076 | regulation of cellular response to insulin stimulus                                 | 12/133 | 80/29008  | 6.18E-05 | 0.000700 | 0.000469 |
| GO:0071706 | BP | GO:0071706 | tumor necrosis factor superfamily cytokine production                               | 20/133 | 191/29008 | 6.34E-05 | 0.000716 | 0.000480 |
| GO:0032496 | BP | GO:0032496 | response to lipopolysaccharide                                                      | 32/133 | 388/29008 | 6.5E-05  | 0.000732 | 0.000490 |
| GO:1902903 | BP | GO:1902903 | regulation of supramolecular fiber organization                                     | 32/133 | 388/29008 | 6.5E-05  | 0.000732 | 0.000490 |
| GO:0051146 | BP | GO:0051146 | striated muscle cell differentiation                                                | 28/133 | 320/29008 | 6.63E-05 | 0.000745 | 0.000499 |
| GO:0006281 | BP | GO:0006281 | DNA repair                                                                          | 38/133 | 485/29008 | 6.65E-05 | 0.000746 | 0.000499 |
| GO:0048638 | BP | GO:0048638 | regulation of developmental growth                                                  | 33/133 | 406/29008 | 6.68E-05 | 0.000747 | 0.000500 |
| GO:0007033 | BP | GO:0007033 | vacuole organization                                                                | 19/133 | 177/29008 | 6.85E-05 | 0.000764 | 0.000512 |
| GO:0900257 | BP | GO:0900257 | regulation of muscle system process                                                 | 24/133 | 255/29008 | 6.97E-05 | 0.000776 | 0.000520 |
| GO:0045927 | BP | GO:0045927 | positive regulation of growth                                                       | 28/133 | 321/29008 | 7E-05    | 0.000778 | 0.000521 |
| GO:0051099 | BP | GO:0051099 | positive regulation of binding                                                      | 20/133 | 193/29008 | 7.33E-05 | 0.000814 | 0.000545 |
| GO:0007369 | BP | GO:0007369 | gastrulation                                                                        | 19/133 | 178/29008 | 7.39E-05 | 0.000817 | 0.000547 |
| GO:0109076 | BP | GO:0109076 | viral release from host cell                                                        | 8/133  | 37/29008  | 7.43E-05 | 0.000817 | 0.000547 |
| GO:0035990 | BP | GO:0035990 | exit from host                                                                      | 8/133  | 37/29008  | 7.43E-05 | 0.000817 | 0.000547 |
| GO:0035991 | BP | GO:0035991 | exit from host cell                                                                 | 8/133  | 37/29008  | 7.43E-05 | 0.000817 | 0.000547 |
| GO:0046606 | BP | GO:0046606 | reproductive structure development                                                  | 37/133 | 480/29008 | 7.59E-05 | 0.000833 | 0.000558 |
| GO:0009411 | BP | GO:0009411 | response to UV                                                                      | 17/133 | 149/29008 | 7.62E-05 | 0.000834 | 0.000559 |
| GO:0002237 | BP | GO:0002237 | response to molecule of bacterial origin                                            | 33/133 | 409/29008 | 7.69E-05 | 0.000840 | 0.000562 |
| GO:010631  | BP | GO:010631  | epithelial cell migration                                                           | 27/133 | 306/29008 | 7.71E-05 | 0.000840 | 0.000562 |
| GO:1901342 | BP | GO:1901342 | regulation of vasculature development                                               | 27/133 | 306/29008 | 7.71E-05 | 0.000840 | 0.000562 |
| GO:0032469 | BP | GO:0032469 | endoplasmic reticulum calcium ion homeostasis                                       | 7/133  | 28/29008  | 7.84E-05 | 0.000852 | 0.000570 |
| GO:0006006 | BP | GO:0006006 | glucose metabolic process                                                           | 22/133 | 225/29008 | 7.85E-05 | 0.000852 | 0.000570 |
| GO:0000082 | BP | GO:0000082 | G1/S transition of mitotic cell cycle                                               | 20/133 | 194/29008 | 7.88E-05 | 0.000853 | 0.000571 |
| GO:0010632 | BP | GO:0010632 | regulation of epithelial cell migration                                             | 23/133 | 241/29008 | 7.92E-05 | 0.000855 | 0.000573 |
| GO:2001244 | BP | GO:2001244 | positive regulation of intrinsic apoptotic signaling pathway                        | 11/133 | 70/29008  | 8.04E-05 | 0.000867 | 0.000580 |
| GO:0031667 | BP | GO:0031667 | response to nutrient levels                                                         | 30/133 | 358/29008 | 8.16E-05 | 0.000878 | 0.000588 |
| GO:0070997 | BP | GO:0070997 | neuron death                                                                        | 34/133 | 428/29008 | 8.18E-05 | 0.000878 | 0.000588 |
| GO:0900132 | BP | GO:0900132 | epithelium migration                                                                | 27/133 | 308/29008 | 8.6E-05  | 0.000922 | 0.000617 |
| GO:0010656 | BP | GO:0010656 | negative regulation of muscle cell apoptotic process                                | 10/133 | 59/29008  | 8.74E-05 | 0.000935 | 0.000626 |
| GO:0006983 | BP | GO:0006983 | ER overload response                                                                | 5/133  | 13/29008  | 8.92E-05 | 0.000950 | 0.000636 |
| GO:000213  | BP | GO:000213  | positive regulation of nuclear-transcribed mRNA poly(A) tail shortening             | 5/133  | 13/29008  | 8.92E-05 | 0.000950 | 0.000636 |
| GO:1902106 | BP | GO:1902106 | negative regulation of leukocyte differentiation                                    | 14/133 | 109/29008 | 8.98E-05 | 0.000955 | 0.000639 |
| GO:0030010 | BP | GO:0030010 | establishment of cell polarity                                                      | 17/133 | 151/29008 | 9E-05    | 0.000955 | 0.000640 |
| GO:0051402 | BP | GO:0051402 | neuron apoptotic process                                                            | 27/133 | 309/29008 | 9.08E-05 | 0.000960 | 0.000643 |
| GO:0045622 | BP | GO:0045622 | regulation of T-helper cell differentiation                                         | 8/133  | 38/29008  | 9.09E-05 | 0.000960 | 0.000643 |
| GO:0009408 | BP | GO:0009408 | response to heat                                                                    | 13/133 | 96/29008  | 9.18E-05 | 0.000965 | 0.000646 |
| GO:1901222 | BP | GO:1901222 | regulation of NIK/NF-kappaB signaling                                               | 13/133 | 96/29008  | 9.18E-05 | 0.000965 | 0.000646 |
| GO:0030888 | BP | GO:0030888 | regulation of B cell proliferation                                                  | 11/133 | 71/29008  | 9.18E-05 | 0.000965 | 0.000646 |
| GO:0070646 | BP | GO:0070646 | protein modification by small protein removal                                       | 16/133 | 137/29008 | 9.28E-05 | 0.000972 | 0.000651 |
| GO:1903052 | BP | GO:1903052 | positive regulation of proteolysis involved in cellular protein catabolic process   | 15/133 | 123/29008 | 9.31E-05 | 0.000972 | 0.000651 |
| GO:0010720 | BP | GO:0010720 | positive regulation of cell development                                             | 31/133 | 378/29008 | 9.31E-05 | 0.000972 | 0.000651 |
| GO:0900130 | BP | GO:0900130 | tissue migration                                                                    | 27/133 | 310/29008 | 9.59E-05 | 0.000999 | 0.000699 |
| GO:0006109 | BP | GO:0006109 | regulation of carbohydrate metabolic process                                        | 20/133 | 197/29008 | 9.75E-05 | 0.001013 | 0.000678 |
| GO:0002824 | BP | GO:0002824 | positive regulation of adaptive immune response based on somatic recombination of   | 17/133 | 152/29008 | 9.78E-05 | 0.001013 | 0.000678 |
| GO:0051092 | BP | GO:0051092 | positive regulation of NF-kappaB transcription factor activity                      | 17/133 | 152/29008 | 9.78E-05 | 0.001013 | 0.000678 |
| GO:0006275 | BP | GO:0006275 | regulation of DNA replication                                                       | 14/133 | 110/29008 | 9.93E-05 | 0.001026 | 0.000687 |
| GO:0032647 | BP | GO:0032647 | regulation of interferon-alpha production                                           | 7/133  | 29/29008  | 9.98E-05 | 0.001026 | 0.000689 |
| GO:0009266 | BP | GO:0009266 | response to temperature stimulus                                                    | 18/133 | 167/29008 | 9.99E-05 | 0.001029 | 0.000689 |
| GO:0002274 | BP | GO:0002274 | myeloid leukocyte activation                                                        | 24/133 | 261/29008 | 0.000100 | 0.001030 | 0.000690 |
| GO:0051656 | BP | GO:0051656 | establishment of organelle localization                                             | 33/133 | 415/29008 | 0.000101 | 0.001041 | 0.000697 |
| GO:0002286 | BP | GO:0002286 | T cell activation involved in immune response                                       | 15/133 | 124/29008 | 0.000102 | 0.001045 | 0.000700 |
| GO:0042158 | BP | GO:0042158 | lipoprotein biosynthetic process                                                    | 13/133 | 97/29008  | 0.000102 | 0.001045 | 0.000700 |
| GO:0050767 | BP | GO:0050767 | regulation of neurogenesis                                                          | 35/133 | 451/29008 | 0.000102 | 0.001045 | 0.000702 |
| GO:0043124 | BP | GO:0043124 | negative regulation of I-kappaB kinase/NF-kappaB signaling                          | 9/133  | 49/29008  | 0.000102 | 0.001048 | 0.000702 |
| GO:1901989 |    |            |                                                                                     |        |           |          |          |          |

|            |    |            |                                                                                      |         |           |          |          |          |
|------------|----|------------|--------------------------------------------------------------------------------------|---------|-----------|----------|----------|----------|
| GO:0036473 | BP | GO:0036473 | cell death in response to oxidative stress                                           | 13/1133 | 101/29008 | 0.000155 | 0.001478 | 0.000990 |
| GO:0042116 | BP | GO:0042116 | macrophage activation                                                                | 13/1133 | 101/29008 | 0.000155 | 0.001478 | 0.000990 |
| GO:0043502 | BP | GO:0043502 | regulation of muscle adaptation                                                      | 13/1133 | 101/29008 | 0.000155 | 0.001478 | 0.000990 |
| GO:0045185 | BP | GO:0045185 | maintenance of protein location                                                      | 13/1133 | 101/29008 | 0.000155 | 0.001478 | 0.000990 |
| GO:0050772 | BP | GO:0050772 | positive regulation of axonogenesis                                                  | 13/1133 | 101/29008 | 0.000155 | 0.001478 | 0.000990 |
| GO:0032607 | BP | GO:0032607 | interferon-alpha production                                                          | 7/1133  | 31/29008  | 0.000157 | 0.001488 | 0.000997 |
| GO:0032801 | BP | GO:0032801 | receptor catabolic process                                                           | 7/1133  | 31/29008  | 0.000157 | 0.001488 | 0.000997 |
| GO:0072539 | BP | GO:0072539 | T-helper 17 cell differentiation                                                     | 7/1133  | 31/29008  | 0.000157 | 0.001488 | 0.000997 |
| GO:0032436 | BP | GO:0032436 | positive regulation of proteasomal ubiquitin-dependent protein catabolic process     | 12/1133 | 88/29008  | 0.000158 | 0.001496 | 0.001002 |
| GO:0010613 | BP | GO:0010613 | positive regulation of cardiac muscle hypertrophy                                    | 8/1133  | 41/29008  | 0.000160 | 0.001510 | 0.001011 |
| GO:0071216 | BP | GO:0071216 | cellular response to biotic stimulus                                                 | 28/1133 | 337/29008 | 0.000160 | 0.001510 | 0.001011 |
| GO:0001667 | BP | GO:0001667 | ameboid-type cell migration                                                          | 34/1133 | 444/29008 | 0.000164 | 0.001552 | 0.001039 |
| GO:0032715 | BP | GO:0032715 | negative regulation of interleukin-6 production                                      | 9/1133  | 52/29008  | 0.000165 | 0.001559 | 0.001044 |
| GO:1904950 | BP | GO:1904950 | negative regulation of establishment of protein localization                         | 16/1133 | 144/29008 | 0.000167 | 0.001569 | 0.001051 |
| GO:0050900 | BP | GO:0050900 | leukocyte migration                                                                  | 30/1133 | 373/29008 | 0.000168 | 0.001578 | 0.001057 |
| GO:0032103 | BP | GO:0032103 | positive regulation of response to external stimulus                                 | 33/1133 | 427/29008 | 0.000172 | 0.001613 | 0.001080 |
| GO:0030316 | BP | GO:0030316 | osteoclast differentiation                                                           | 14/1133 | 116/29008 | 0.000176 | 0.001640 | 0.001099 |
| GO:0043534 | BP | GO:0043534 | blood vessel endothelial cell migration                                              | 14/1133 | 116/29008 | 0.000176 | 0.001640 | 0.001099 |
| GO:0051346 | BP | GO:0051346 | negative regulation of hydrolase activity                                            | 30/1133 | 374/29008 | 0.000176 | 0.001642 | 0.001100 |
| GO:0002456 | BP | GO:0002456 | T cell mediated immunity                                                             | 16/1133 | 145/29008 | 0.000181 | 0.001683 | 0.001127 |
| GO:0010906 | BP | GO:0010906 | regulation of glucose metabolic process                                              | 15/1133 | 131/29008 | 0.000189 | 0.001571 | 0.001177 |
| GO:0014742 | BP | GO:0014742 | positive regulation of muscle hypertrophy                                            | 8/1133  | 42/29008  | 0.000191 | 0.001763 | 0.001181 |
| GO:1900744 | BP | GO:1900744 | regulation of p38MAPK cascade                                                        | 8/1133  | 42/29008  | 0.000191 | 0.001763 | 0.001181 |
| GO:0006888 | BP | GO:0006888 | endoplasmic reticulum to Golgi vesicle-mediated transport                            | 14/1133 | 117/29008 | 0.000193 | 0.001776 | 0.001189 |
| GO:0014812 | BP | GO:0014812 | muscle cell migration                                                                | 14/1133 | 117/29008 | 0.000193 | 0.001776 | 0.001189 |
| GO:0014743 | BP | GO:0014743 | regulation of muscle hypertrophy                                                     | 11/1133 | 77/29008  | 0.000193 | 0.001776 | 0.001189 |
| GO:1901532 | BP | GO:1901532 | regulation of hematopoietic progenitor cell differentiation                          | 7/1133  | 32/29008  | 0.000194 | 0.001776 | 0.001189 |
| GO:1905898 | BP | GO:1905898 | positive regulation of response to endoplasmic reticulum stress                      | 7/1133  | 32/29008  | 0.000194 | 0.001776 | 0.001189 |
| GO:0033235 | BP | GO:0033235 | positive regulation of protein sumoylation                                           | 5/1133  | 15/29008  | 0.000194 | 0.001776 | 0.001189 |
| GO:0060211 | BP | GO:0060211 | regulation of nuclear-transcribed mRNA poly(A) tail shortening                       | 5/1133  | 15/29008  | 0.000194 | 0.001776 | 0.001189 |
| GO:0019318 | BP | GO:0019318 | hexose metabolic process                                                             | 23/1133 | 256/29008 | 0.000195 | 0.001776 | 0.001189 |
| GO:1901992 | BP | GO:1901992 | positive regulation of mitotic cell cycle phase transition                           | 12/1133 | 90/29008  | 0.000196 | 0.001785 | 0.001196 |
| GO:0002366 | BP | GO:0002366 | leukocyte activation involved in immune response                                     | 27/1133 | 324/29008 | 0.000196 | 0.001798 | 0.001204 |
| GO:0000413 | BP | GO:0000413 | protein peptidyl-prolyl isomerization                                                | 6/1133  | 23/29008  | 0.000199 | 0.001805 | 0.001209 |
| GO:1900101 | BP | GO:1900101 | regulation of endoplasmic reticulum unfolded protein response                        | 6/1133  | 23/29008  | 0.000199 | 0.001805 | 0.001209 |
| GO:0032615 | BP | GO:0032615 | interleukin-12 production                                                            | 10/1133 | 65/29008  | 0.000201 | 0.001819 | 0.001218 |
| GO:0050727 | BP | GO:0050727 | regulation of inflammatory response                                                  | 28/1133 | 342/29008 | 0.000204 | 0.001843 | 0.001234 |
| GO:0007030 | BP | GO:0007030 | Golgi organization                                                                   | 15/1133 | 132/29008 | 0.000206 | 0.001857 | 0.001244 |
| GO:0002700 | BP | GO:0002700 | regulation of production of molecular mediator of immune response                    | 18/1133 | 177/29008 | 0.000208 | 0.001872 | 0.001254 |
| GO:0003300 | BP | GO:0003300 | cardiac muscle hypertrophy                                                           | 13/1133 | 104/29008 | 0.000208 | 0.001872 | 0.001254 |
| GO:0044262 | BP | GO:0044262 | cellular carbohydrate metabolic process                                              | 25/1133 | 291/29008 | 0.000211 | 0.001892 | 0.001267 |
| GO:0035303 | BP | GO:0035303 | regulation of dephosphorylation                                                      | 15/1133 | 133/29008 | 0.000224 | 0.002005 | 0.001343 |
| GO:0016925 | BP | GO:0016925 | protein sumoylation                                                                  | 8/1133  | 43/29008  | 0.000226 | 0.002019 | 0.001352 |
| GO:0046636 | BP | GO:0046636 | negative regulation of alpha-beta T cell activation                                  | 8/1133  | 43/29008  | 0.000226 | 0.002019 | 0.001352 |
| GO:0060761 | BP | GO:0060761 | negative regulation of response to cytokine stimulus                                 | 10/1133 | 66/29008  | 0.000229 | 0.002039 | 0.001366 |
| GO:0006816 | BP | GO:0006816 | calcium ion transport                                                                | 33/1133 | 434/29008 | 0.000232 | 0.002063 | 0.001382 |
| GO:0032102 | BP | GO:0032102 | negative regulation of response to external stimulus                                 | 31/1133 | 398/29008 | 0.000233 | 0.002071 | 0.001387 |
| GO:0043523 | BP | GO:0043523 | regulation of neuron apoptotic process                                               | 24/1133 | 276/29008 | 0.000234 | 0.002072 | 0.001388 |
| GO:0048641 | BP | GO:0048641 | regulation of skeletal muscle tissue development                                     | 7/1133  | 33/29008  | 0.000238 | 0.002106 | 0.001410 |
| GO:0016458 | BP | GO:0016458 | gene silencing                                                                       | 22/1133 | 243/29008 | 0.000238 | 0.002106 | 0.001410 |
| GO:0002263 | BP | GO:0002263 | cell activation involved in immune response                                          | 27/1133 | 328/29008 | 0.000241 | 0.002125 | 0.001423 |
| GO:0006497 | BP | GO:0006497 | protein lipidation                                                                   | 12/1133 | 92/29008  | 0.000242 | 0.002130 | 0.001426 |
| GO:0000466 | BP | GO:0000466 | maturational of 5.8S rRNA from tricistronic rRNA transcript (SSU-rRNA, 5.8S rRNA, LS | 6/1133  | 24/29008  | 0.000257 | 0.002251 | 0.001507 |
| GO:0016578 | BP | GO:0016578 | histone deubiquitination                                                             | 6/1133  | 24/29008  | 0.000257 | 0.002251 | 0.001507 |
| GO:0032727 | BP | GO:0032727 | positive regulation of interferon-alpha production                                   | 6/1133  | 24/29008  | 0.000257 | 0.002251 | 0.001507 |
| GO:0045580 | BP | GO:0045580 | regulation of T cell differentiation                                                 | 17/1133 | 165/29008 | 0.000265 | 0.002315 | 0.001551 |
| GO:0032651 | BP | GO:0032651 | regulation of interleukin-1 beta production                                          | 12/1133 | 93/29008  | 0.000268 | 0.002361 | 0.001565 |
| GO:0043535 | BP | GO:0043535 | regulation of blood vessel endothelial cell migration                                | 12/1133 | 93/29008  | 0.000268 | 0.002361 | 0.001565 |
| GO:0001771 | BP | GO:0001771 | immunological synapse formation                                                      | 5/1133  | 16/29008  | 0.000274 | 0.002381 | 0.001595 |
| GO:0042921 | BP | GO:0042921 | glucocorticoid receptor signaling pathway                                            | 5/1133  | 16/29008  | 0.000274 | 0.002381 | 0.001595 |
| GO:0017015 | BP | GO:0017015 | regulation of transforming growth factor beta receptor signaling pathway             | 14/1133 | 121/29008 | 0.000275 | 0.002383 | 0.001596 |
| GO:1901800 | BP | GO:1901800 | positive regulation of proteasomal protein catabolic process                         | 13/1133 | 107/29008 | 0.000277 | 0.002401 | 0.001608 |
| GO:0032675 | BP | GO:0032675 | regulation of interleukin-6 production                                               | 17/1133 | 166/29008 | 0.000284 | 0.002459 | 0.001647 |
| GO:0010922 | BP | GO:0010922 | positive regulation of phosphatase activity                                          | 7/1133  | 34/29008  | 0.000290 | 0.002501 | 0.001675 |
| GO:1901224 | BP | GO:1901224 | positive regulation of NIK/NF-kappaB signaling                                       | 10/1133 | 68/29008  | 0.000294 | 0.002534 | 0.001697 |
| GO:1903321 | BP | GO:1903321 | negative regulation of protein modification by small protein conjugation or removal  | 12/1133 | 94/29008  | 0.000296 | 0.002551 | 0.001709 |
| GO:0043405 | BP | GO:0043405 | regulation of MAP kinase activity                                                    | 19/1133 | 198/29008 | 0.000298 | 0.002559 | 0.001714 |
| GO:0051271 | BP | GO:0051271 | negative regulation of cellular component movement                                   | 26/1133 | 315/29008 | 0.000299 | 0.002559 | 0.001714 |
| GO:0042177 | BP | GO:0042177 | negative regulation of protein catabolic process                                     | 14/1133 | 122/29008 | 0.000299 | 0.002559 | 0.001714 |
| GO:0042542 | BP | GO:0042542 | response to hydrogen peroxide                                                        | 14/1133 | 122/29008 | 0.000299 | 0.002559 | 0.001714 |
| GO:0014897 | BP | GO:0014897 | striated muscle hypertrophy                                                          | 13/1133 | 108/29008 | 0.000304 | 0.002594 | 0.001737 |
| GO:0045913 | BP | GO:0045913 | positive regulation of carbohydrate metabolic process                                | 11/1133 | 81/29008  | 0.000304 | 0.002594 | 0.001737 |
| GO:0042129 | BP | GO:0042129 | regulation of T cell proliferation                                                   | 18/1133 | 183/29008 | 0.000315 | 0.002677 | 0.001793 |
| GO:0060212 | BP | GO:0060212 | regulation of small molecule metabolic process                                       | 29/1133 | 369/29008 | 0.000315 | 0.002677 | 0.001793 |
| GO:0050860 | BP | GO:0050860 | negative regulation of T cell receptor signaling pathway                             | 6/1133  | 25/29008  | 0.000327 | 0.002773 | 0.001857 |
| GO:0010660 | BP | GO:0010660 | regulation of muscle cell apoptotic process                                          | 12/1133 | 95/29008  | 0.000328 | 0.002773 | 0.001857 |
| GO:1903900 | BP | GO:1903900 | regulation of viral life cycle                                                       | 16/1133 | 153/29008 | 0.000335 | 0.002835 | 0.001899 |
| GO:0002064 | BP | GO:0002064 | epithelial cell development                                                          | 23/1133 | 266/29008 | 0.000339 | 0.002857 | 0.001914 |
| GO:0031648 | BP | GO:0031648 | protein destabilization                                                              | 9/1133  | 57/29008  | 0.000340 | 0.002863 | 0.001917 |
| GO:0043666 | BP | GO:0043666 | regulation of phosphoprotein phosphatase activity                                    | 9/1133  | 57/29008  | 0.000340 | 0.002863 | 0.001917 |
| GO:1901991 | BP | GO:1901991 | negative regulation of mitotic cell cycle phase transition                           | 17/1133 | 169/29008 | 0.000351 | 0.002951 | 0.001977 |
| GO:1903844 | BP | GO:1903844 | regulation of cellular response to transforming growth factor beta stimulus          | 14/1133 | 124/29008 | 0.000351 | 0.002973 | 0.001991 |
| GO:0033044 | BP | GO:0033044 | regulation of chromosome organization                                                | 18/1133 | 185/29008 | 0.000359 | 0.003003 | 0.002011 |
| GO:0050770 | BP | GO:0050770 | regulation of axonogenesis                                                           | 18/1133 | 185/29008 | 0.000359 | 0.003003 | 0.002011 |
| GO:0034502 | BP | GO:0034502 | protein localization to chromosome                                                   | 12/1133 | 96/29008  | 0.000361 | 0.003015 | 0.002019 |
| GO:0031341 | BP | GO:0031341 | regulation of cell killing                                                           | 15/1133 | 139/29008 | 0.000363 | 0.003024 | 0.002025 |
| GO:0014896 | BP | GO:0014896 | muscle hypertrophy                                                                   | 13/1133 | 110/29008 | 0.000365 | 0.003028 | 0.002028 |
| GO:0032780 | BP | GO:0032780 | positive regulation of tumor necrosis factor production                              | 13/1133 | 110/29008 | 0.000365 | 0.003028 | 0.002028 |
| GO:0010907 | BP | GO:0010907 | positive regulation of glucose metabolic process                                     | 8/1133  | 46/29008  | 0.000367 | 0.003037 | 0.002034 |
| GO:0030890 | BP | GO:0030890 | positive regulation of B cell proliferation                                          | 8/1133  | 46/29008  | 0.000367 | 0.003037 | 0.002034 |
| GO:0045005 | BP | GO:0045005 | DNA-dependent DNA replication maintenance of fidelity                                | 8/1133  | 46/29008  | 0.000367 | 0.003037 | 0.002034 |
| GO:2000514 | BP | GO:2000514 | regulation of CD4-positive, alpha-beta T cell activation                             | 10/1133 | 70/29008  | 0.000374 | 0.003070 | 0.002056 |
| GO:0031958 | BP | GO:0031958 | corticosteroid receptor signaling pathway                                            | 5/1133  | 17/29008  | 0.000376 | 0.003070 | 0.002056 |
| GO:0032986 | BP | GO:0032986 | protein-DNA complex disassembly                                                      | 5/1133  | 17/29008  | 0.000376 | 0.003070 | 0.002056 |
| GO:0070262 | BP | GO:0070262 | peptidyl-serine dephosphorylation                                                    | 5/1133  | 17/29008  | 0.000376 | 0.003070 | 0.002056 |
| GO:0071243 | BP | GO:0071243 | cellular response to arsenic-containing substance                                    | 5/1133  | 17/29008  | 0.000376 | 0.003070 | 0.002056 |
| GO:0071498 | BP | GO:0071498 | cellular response to fluid shear stress                                              | 5/1133  | 17/29008  | 0.000376 | 0.003070 | 0.002056 |
| GO:1902916 | BP | GO:1902916 | positive regulation of protein polyubiquitination                                    | 5/1133  | 17/29008  | 0.000376 | 0.003070 | 0.002056 |
| GO:0002244 | BP | GO:0002244 | hematopoietic progenitor cell differentiation                                        | 17/1133 | 170/29008 | 0.000377 | 0.003070 | 0.002056 |
| GO:0007254 | BP | GO:0007254 | JNK cascade                                                                          | 17/1133 | 170/29008 | 0.000377 | 0.003070 | 0.002056 |
| GO:0008154 | BP | GO:0008154 | actin polymerization or depolymerization                                             | 20/1133 | 218/29008 | 0.000378 | 0.003070 | 0.002060 |
| GO:0007059 | BP | GO:0007059 | chromosome segregation                                                               | 27/1133 | 338/29008 | 0.000388 | 0.003151 | 0.002112 |
| GO:0006754 | BP | GO:0006754 | ATP biosynthetic process                                                             | 9/1133  | 58/29008  | 0.000398 | 0.003153 | 0.002112 |
| GO:0045058 | BP | GO:0045058 | T cell selection                                                                     | 9/1133  | 58/29008  | 0.000398 | 0.003153 | 0.002112 |
| GO:0034614 | BP | GO:0034614 | cellular response to reactive oxygen species                                         | 15/1133 | 140/29008 | 0.000392 | 0.003167 | 0.002121 |
| GO:0071987 | BP | GO:0071987 | leukocyte apoptotic process                                                          | 15/1133 | 140/29008 | 0.000392 | 0.003167 | 0.002121 |
| GO:0002718 | BP | GO:0002718 | regulation of cytokine production involved in immune response                        | 12/1133 | 97/29008  | 0.000396 | 0.003210 | 0.002150 |
| GO:1900246 | BP | GO:1900246 | positive regulation of RIG-I signaling pathway                                       | 4/1133  | 10/29008  | 0.000402 | 0.003231 | 0.00216  |

|            |    |            |                                                                                       |        |           |          |          |          |
|------------|----|------------|---------------------------------------------------------------------------------------|--------|-----------|----------|----------|----------|
| GO:200045  | BP | GO:200045  | regulation of G1/S transition of mitotic cell cycle                                   | 14/133 | 128/29008 | 0.000491 | 0.003772 | 0.002526 |
| GO:001890  | BP | GO:001890  | placenta development                                                                  | 17/133 | 174/29008 | 0.000493 | 0.003778 | 0.002531 |
| GO:002635  | BP | GO:002635  | interleukin-6 production                                                              | 17/133 | 174/29008 | 0.000493 | 0.003778 | 0.002531 |
| GO:005085  | BP | GO:005085  | regulation of B cell receptor signaling pathway                                       | 5/133  | 18/29008  | 0.000504 | 0.003837 | 0.002570 |
| GO:190037  | BP | GO:190037  | regulation of cellular response to hypoxia                                            | 5/133  | 18/29008  | 0.000504 | 0.003837 | 0.002570 |
| GO:1902176 | BP | GO:1902176 | negative regulation of oxidative stress-induced intrinsic apoptotic signaling pathway | 5/133  | 18/29008  | 0.000504 | 0.003837 | 0.002570 |
| GO:2000319 | BP | GO:2000319 | regulation of T-helper 17 cell differentiation                                        | 5/133  | 18/29008  | 0.000504 | 0.003837 | 0.002570 |
| GO:002685  | BP | GO:002685  | regulation of leukocyte migration                                                     | 20/133 | 223/29008 | 0.000506 | 0.003847 | 0.002577 |
| GO:007064  | BP | GO:007064  | mitotic sister chromatid cohesion                                                     | 6/133  | 27/29008  | 0.000512 | 0.003868 | 0.002591 |
| GO:0032781 | BP | GO:0032781 | positive regulation of ATPase activity                                                | 6/133  | 27/29008  | 0.000512 | 0.003868 | 0.002591 |
| GO:040033  | BP | GO:040033  | negative regulation of translation, ncRNA-mediated                                    | 6/133  | 27/29008  | 0.000512 | 0.003868 | 0.002591 |
| GO:044974  | BP | GO:044974  | regulation of translation, ncRNA-mediated                                             | 6/133  | 27/29008  | 0.000512 | 0.003868 | 0.002591 |
| GO:010657  | BP | GO:010657  | muscle cell apoptotic process                                                         | 12/133 | 100/29008 | 0.000527 | 0.003977 | 0.002604 |
| GO:0033209 | BP | GO:0033209 | tumor necrosis factor-mediated signaling pathway                                      | 10/133 | 73/29008  | 0.000528 | 0.003977 | 0.002604 |
| GO:0030336 | BP | GO:0030336 | negative regulation of cell migration                                                 | 24/133 | 293/29008 | 0.000559 | 0.004199 | 0.002812 |
| GO:0051258 | BP | GO:0051258 | protein polymerization                                                                | 24/133 | 293/29008 | 0.000559 | 0.004199 | 0.002812 |
| GO:002832  | BP | GO:002832  | negative regulation of response to biotic stimulus                                    | 13/133 | 115/29008 | 0.000562 | 0.004213 | 0.002822 |
| GO:0050764 | BP | GO:0050764 | regulation of phagocytosis                                                            | 13/133 | 115/29008 | 0.000562 | 0.004213 | 0.002822 |
| GO:0060324 | BP | GO:0060324 | face development                                                                      | 9/133  | 61/29008  | 0.000571 | 0.004270 | 0.002860 |
| GO:010332  | BP | GO:010332  | response to gamma radiation                                                           | 8/133  | 49/29008  | 0.000573 | 0.004270 | 0.002860 |
| GO:0032873 | BP | GO:0032873 | negative regulation of stress-activated MAPK cascade                                  | 8/133  | 49/29008  | 0.000573 | 0.004270 | 0.002860 |
| GO:0070303 | BP | GO:0070303 | negative regulation of stress-activated protein kinase signaling cascade              | 8/133  | 49/29008  | 0.000573 | 0.004270 | 0.002860 |
| GO:010506  | BP | GO:010506  | regulation of autophagy                                                               | 22/133 | 259/29008 | 0.000574 | 0.004273 | 0.002862 |
| GO:016441  | BP | GO:016441  | posttranscriptional gene silencing                                                    | 16/133 | 161/29008 | 0.000592 | 0.004401 | 0.002948 |
| GO:2001144 | BP | GO:2001144 | positive regulation of DNA-templated transcription, initiation                        | 7/133  | 38/29008  | 0.000594 | 0.004407 | 0.002952 |
| GO:045444  | BP | GO:045444  | fat cell differentiation                                                              | 22/133 | 260/29008 | 0.000605 | 0.004481 | 0.003001 |
| GO:0071888 | BP | GO:0071888 | macrophage apoptotic process                                                          | 4/133  | 11/29008  | 0.000612 | 0.004532 | 0.003036 |
| GO:1903828 | BP | GO:1903828 | negative regulation of cellular protein localization                                  | 14/133 | 131/29008 | 0.000621 | 0.004588 | 0.003073 |
| GO:016577  | BP | GO:016577  | histone demethylation                                                                 | 6/133  | 28/29008  | 0.000630 | 0.004636 | 0.003105 |
| GO:0070076 | BP | GO:0070076 | histone lysine demethylation                                                          | 6/133  | 28/29008  | 0.000630 | 0.004636 | 0.003105 |
| GO:1902175 | BP | GO:1902175 | regulation of oxidative stress-induced intrinsic apoptotic signaling pathway          | 6/133  | 28/29008  | 0.000630 | 0.004636 | 0.003105 |
| GO:0011704 | BP | GO:0011704 | formation of primary germ layer                                                       | 12/133 | 102/29008 | 0.000632 | 0.004636 | 0.003105 |
| GO:006476  | BP | GO:006476  | protein deacetylation                                                                 | 12/133 | 102/29008 | 0.000632 | 0.004636 | 0.003105 |
| GO:043112  | BP | GO:043112  | receptor metabolic process                                                            | 18/133 | 194/29008 | 0.000635 | 0.004653 | 0.003118 |
| GO:0001960 | BP | GO:0001960 | negative regulation of cytokine-mediated signaling pathway                            | 9/133  | 62/29008  | 0.000645 | 0.004723 | 0.003163 |
| GO:007492  | BP | GO:007492  | endoderm development                                                                  | 10/133 | 75/29008  | 0.000656 | 0.004791 | 0.003209 |
| GO:1901796 | BP | GO:1901796 | regulation of signal transduction by p53 class mediator                               | 10/133 | 75/29008  | 0.000656 | 0.004791 | 0.003209 |
| GO:002753  | BP | GO:002753  | cytoplasmic pattern recognition receptor signaling pathway                            | 8/133  | 50/29008  | 0.000659 | 0.004801 | 0.003216 |
| GO:0007039 | BP | GO:0007039 | protein catabolic process in the vacuole                                              | 5/133  | 19/29008  | 0.000662 | 0.004801 | 0.003216 |
| GO:0051571 | BP | GO:0051571 | positive regulation of histone H3-K4 methylation                                      | 5/133  | 19/29008  | 0.000662 | 0.004801 | 0.003216 |
| GO:0071786 | BP | GO:0071786 | endoplasmic reticulum tubular network organization                                    | 5/133  | 19/29008  | 0.000662 | 0.004801 | 0.003216 |
| GO:140467  | BP | GO:140467  | integrated stress response signaling                                                  | 5/133  | 19/29008  | 0.000662 | 0.004801 | 0.003216 |
| GO:042100  | BP | GO:042100  | B cell proliferation                                                                  | 13/133 | 117/29008 | 0.000663 | 0.004801 | 0.003216 |
| GO:0007178 | BP | GO:0007178 | transmembrane receptor protein serine/threonine kinase signaling pathway              | 29/133 | 387/29008 | 0.000681 | 0.004921 | 0.003296 |
| GO:0034644 | BP | GO:0034644 | cellular response to UV                                                               | 11/133 | 89/29008  | 0.000692 | 0.004990 | 0.003342 |
| GO:010959  | BP | GO:010959  | regulation of metal ion transport                                                     | 32/133 | 443/29008 | 0.000692 | 0.004990 | 0.003342 |
| GO:0001706 | BP | GO:0001706 | endoderm formation                                                                    | 7/133  | 39/29008  | 0.000700 | 0.005017 | 0.003360 |
| GO:0001782 | BP | GO:0001782 | B cell homeostasis                                                                    | 7/133  | 39/29008  | 0.000700 | 0.005017 | 0.003360 |
| GO:018208  | BP | GO:018208  | peptidyl-proline modification                                                         | 7/133  | 39/29008  | 0.000700 | 0.005017 | 0.003360 |
| GO:0031297 | BP | GO:0031297 | replication fork processing                                                           | 7/133  | 39/29008  | 0.000700 | 0.005017 | 0.003360 |
| GO:0030312 | BP | GO:0030312 | muscle system process                                                                 | 31/133 | 425/29008 | 0.000710 | 0.005083 | 0.003404 |
| GO:0003158 | BP | GO:0003158 | endothelium development                                                               | 14/133 | 133/29008 | 0.000723 | 0.005167 | 0.003461 |
| GO:0010675 | BP | GO:0010675 | regulation of cellular carbohydrate metabolic process                                 | 16/133 | 164/29008 | 0.000724 | 0.005174 | 0.003466 |
| GO:0030865 | BP | GO:0030865 | cortical cytoskeleton organization                                                    | 9/133  | 63/29008  | 0.000727 | 0.005180 | 0.003469 |
| GO:043966  | BP | GO:043966  | histone H3 acetylation                                                                | 9/133  | 63/29008  | 0.000727 | 0.005180 | 0.003469 |
| GO:0002704 | BP | GO:0002704 | negative regulation of leukocyte mediated immunity                                    | 10/133 | 76/29008  | 0.000730 | 0.005185 | 0.003473 |
| GO:2000573 | BP | GO:2000573 | positive regulation of DNA biosynthetic process                                       | 10/133 | 76/29008  | 0.000730 | 0.005185 | 0.003473 |
| GO:044930  | BP | GO:044930  | negative regulation of mitotic cell cycle                                             | 20/133 | 231/29008 | 0.000789 | 0.005598 | 0.003750 |
| GO:0442593 | BP | GO:0442593 | glucose homeostasis                                                                   | 23/133 | 283/29008 | 0.000802 | 0.005679 | 0.003804 |
| GO:0051147 | BP | GO:0051147 | regulation of muscle cell differentiation                                             | 15/133 | 150/29008 | 0.000813 | 0.005742 | 0.003846 |
| GO:1902806 | BP | GO:1902806 | regulation of cell cycle G1/S phase transition                                        | 15/133 | 150/29008 | 0.000813 | 0.005742 | 0.003846 |
| GO:0051893 | BP | GO:0051893 | regulation of focal adhesion assembly                                                 | 9/133  | 64/29008  | 0.000817 | 0.005758 | 0.003857 |
| GO:0090109 | BP | GO:0090109 | regulation of cell-substrate junction assembly                                        | 9/133  | 64/29008  | 0.000817 | 0.005758 | 0.003857 |
| GO:0033144 | BP | GO:0033144 | negative regulation of intracellular steroid hormone receptor signaling pathway       | 7/133  | 40/29008  | 0.000820 | 0.005758 | 0.003857 |
| GO:0090224 | BP | GO:0090224 | regulation of spindle organization                                                    | 7/133  | 40/29008  | 0.000820 | 0.005758 | 0.003857 |
| GO:1902749 | BP | GO:1902749 | regulation of cell cycle G2/M phase transition                                        | 12/133 | 105/29008 | 0.000820 | 0.005758 | 0.003857 |
| GO:0033135 | BP | GO:0033135 | regulation of peptidyl-serine phosphorylation                                         | 16/133 | 166/29008 | 0.000828 | 0.005790 | 0.003878 |
| GO:1903578 | BP | GO:1903578 | regulation of ATP metabolic process                                                   | 11/133 | 91/29008  | 0.000835 | 0.005848 | 0.003917 |
| GO:0032609 | BP | GO:0032609 | interferon-gamma production                                                           | 14/133 | 135/29008 | 0.000838 | 0.005856 | 0.003924 |
| GO:0033500 | BP | GO:0033500 | carbohydrate homeostasis                                                              | 23/133 | 284/29008 | 0.000841 | 0.005871 | 0.003932 |
| GO:0001776 | BP | GO:0001776 | leukocyte homeostasis                                                                 | 13/133 | 120/29008 | 0.000843 | 0.005880 | 0.003938 |
| GO:0002643 | BP | GO:0002643 | regulation of tolerance induction                                                     | 5/133  | 20/29008  | 0.000855 | 0.005907 | 0.003956 |
| GO:0003159 | BP | GO:0003159 | morphogenesis of an endothelium                                                       | 5/133  | 20/29008  | 0.000855 | 0.005907 | 0.003956 |
| GO:0032695 | BP | GO:0032695 | negative regulation of interleukin-12 production                                      | 5/133  | 20/29008  | 0.000855 | 0.005907 | 0.003956 |
| GO:0033962 | BP | GO:0033962 | P-body assembly                                                                       | 5/133  | 20/29008  | 0.000855 | 0.005907 | 0.003956 |
| GO:0445623 | BP | GO:0445623 | negative regulation of T-helper cell differentiation                                  | 5/133  | 20/29008  | 0.000855 | 0.005907 | 0.003956 |
| GO:0445722 | BP | GO:0445722 | positive regulation of gluconeogenesis                                                | 5/133  | 20/29008  | 0.000855 | 0.005907 | 0.003956 |
| GO:0061154 | BP | GO:0061154 | endothelial tube morphogenesis                                                        | 5/133  | 20/29008  | 0.000855 | 0.005907 | 0.003956 |
| GO:0060203 | BP | GO:0060203 | aminoglycan biosynthetic process                                                      | 8/133  | 52/29008  | 0.000862 | 0.005936 | 0.003976 |
| GO:0445581 | BP | GO:0445581 | negative regulation of T cell differentiation                                         | 8/133  | 52/29008  | 0.000862 | 0.005936 | 0.003976 |
| GO:2000059 | BP | GO:2000059 | negative regulation of ubiquitin-dependent protein catabolic process                  | 8/133  | 52/29008  | 0.000862 | 0.005936 | 0.003976 |
| GO:016055  | BP | GO:016055  | Wnt signaling pathway                                                                 | 32/133 | 449/29008 | 0.000866 | 0.005951 | 0.003986 |
| GO:0007051 | BP | GO:0007051 | spindle organization                                                                  | 17/133 | 183/29008 | 0.000875 | 0.006004 | 0.004022 |
| GO:0061418 | BP | GO:0061418 | regulation of transcription from RNA polymerase II promoter in response to hypoxia    | 4/133  | 12/29008  | 0.000890 | 0.006106 | 0.004089 |
| GO:016575  | BP | GO:016575  | histone deacetylation                                                                 | 10/133 | 78/29008  | 0.000897 | 0.006135 | 0.004109 |
| GO:0071277 | BP | GO:0071277 | cellular response to calcium ion                                                      | 10/133 | 78/29008  | 0.000897 | 0.006135 | 0.004109 |
| GO:010821  | BP | GO:010821  | regulation of mitochondrial organization                                              | 14/133 | 136/29008 | 0.000901 | 0.006156 | 0.004123 |
| GO:006611  | BP | GO:006611  | protein export from nucleus                                                           | 9/133  | 65/29008  | 0.000916 | 0.006250 | 0.004186 |
| GO:0051924 | BP | GO:0051924 | regulation of calcium ion transport                                                   | 23/133 | 286/29008 | 0.000924 | 0.006291 | 0.004214 |
| GO:0032271 | BP | GO:0032271 | regulation of protein polymerization                                                  | 20/133 | 234/29008 | 0.000926 | 0.006291 | 0.004214 |
| GO:0000470 | BP | GO:0000470 | maturation of LSU-rRNA                                                                | 6/133  | 30/29008  | 0.000929 | 0.006291 | 0.004214 |
| GO:1902751 | BP | GO:1902751 | positive regulation of cell cycle G2/M phase transition                               | 6/133  | 30/29008  | 0.000929 | 0.006291 | 0.004214 |
| GO:1902914 | BP | GO:1902914 | regulation of protein polyubiquitination                                              | 6/133  | 30/29008  | 0.000929 | 0.006291 | 0.004214 |
| GO:0448659 | BP | GO:0448659 | smooth muscle cell proliferation                                                      | 17/133 | 184/29008 | 0.000929 | 0.006291 | 0.004214 |
| GO:198738  | BP | GO:198738  | cell-cell signaling by wnt                                                            | 32/133 | 451/29008 | 0.000931 | 0.006297 | 0.004216 |
| GO:043368  | BP | GO:043368  | positive T cell selection                                                             | 7/133  | 41/29008  | 0.000936 | 0.006445 | 0.004317 |
| GO:044627  | BP | GO:044627  | negative regulation of insulin receptor signaling pathway                             | 7/133  | 41/29008  | 0.000936 | 0.006445 | 0.004317 |
| GO:006874  | BP | GO:006874  | cellular calcium ion homeostasis                                                      | 34/133 | 490/29008 | 0.000964 | 0.006494 | 0.004350 |
| GO:0033555 | BP | GO:0033555 | multicellular organismal response to stress                                           | 12/133 | 107/29008 | 0.000971 | 0.006528 | 0.004373 |
| GO:0440013 | BP | GO:0440013 | negative regulation of locomotion                                                     | 26/133 | 341/29008 | 0.000979 | 0.006577 | 0.004405 |
| GO:0443370 | BP | GO:0443370 | regulation of CD4-positive, alpha-beta T cell differentiation                         | 8/133  | 53/29008  | 0.000982 | 0.006585 | 0.004411 |
| GO:2000146 | BP | GO:2000146 | negative regulation of cell motility                                                  | 24/133 | 306/29008 | 0.001025 | 0.006858 | 0.004594 |
| GO:1903051 | BP | GO:1903051 | negative regulation of proteolysis involved in cellular protein catabolic process     | 9/133  | 66/29008  | 0.001025 | 0.006858 | 0.004594 |
| GO:0002285 | BP | GO:0002285 | lymphocyte activation involved in immune response                                     | 19/133 | 219/29008 | 0.001029 | 0.006876 | 0.004605 |
| GO:0009749 | BP | GO:0009749 | response to glucose                                                                   | 17/133 | 186/29008 | 0.001048 | 0.006944 | 0.004685 |
| GO:0007006 | BP | GO:0007006 | mitochondrial membrane organization                                                   | 12/133 | 108/29008 | 0.001054 | 0.007071 | 0.004700 |
| GO:0071901 | BP | GO:0071901 | negative regulation of protein serine/threonine kinase activity                       | 12/133 | 108/29008 | 0.001054 | 0.007071 | 0.004700 |
| GO:0051251 | BP | GO:0051251 | positive regulation of lymphocyte activation                                          | 31/133 | 436/29008 | 0.001074 | 0.007140 | 0.004782 |
| GO:0446777 | BP | GO:0446777 | protein autophosphorylation                                                           | 20/133 | 237/29008 | 0.001083 | 0.007198 | 0.004809 |

|            |    |            |                                                                |         |           |           |           |           |
|------------|----|------------|----------------------------------------------------------------|---------|-----------|-----------|-----------|-----------|
| GO:0032608 | BP | GO:0032608 | interferon-beta production                                     | 9/1133  | 68/29008  | 0.0012731 | 0.008131  | 0.0054468 |
| GO:0032648 | BP | GO:0032648 | regulation of interferon-beta production                       | 9/1133  | 68/29008  | 0.0012731 | 0.008131  | 0.0054468 |
| GO:0001824 | BP | GO:0001824 | blastocyst development                                         | 15/1133 | 157/29008 | 0.0012951 | 0.008241  | 0.005520  |
| GO:0008360 | BP | GO:0008360 | regulation of cell shape                                       | 15/1133 | 157/29008 | 0.0012951 | 0.008241  | 0.005520  |
| GO:0071322 | BP | GO:0071322 | cellular response to carbohydrate stimulus                     | 15/1133 | 157/29008 | 0.0012951 | 0.008241  | 0.005520  |
| GO:0070444 | BP | GO:0070444 | cell-substrate junction assembly                               | 11/1133 | 96/29008  | 0.0013051 | 0.008297  | 0.0055571 |
| GO:0034284 | BP | GO:0034284 | response to monosaccharide                                     | 17/1133 | 190/29008 | 0.0013231 | 0.008366  | 0.005604  |
| GO:0002260 | BP | GO:0002260 | lymphocyte homeostasis                                         | 10/1133 | 82/29008  | 0.0013261 | 0.008366  | 0.005604  |
| GO:0072332 | BP | GO:0072332 | intrinsic apoptotic signaling pathway by p53 class mediator    | 10/1133 | 82/29008  | 0.0013261 | 0.008366  | 0.005604  |
| GO:0006482 | BP | GO:0006482 | protein demethylation                                          | 6/1133  | 32/29008  | 0.0013271 | 0.008366  | 0.005604  |
| GO:0008214 | BP | GO:0008214 | protein dealkylation                                           | 6/1133  | 32/29008  | 0.0013271 | 0.008366  | 0.005604  |
| GO:0022037 | BP | GO:0022037 | metencephalon development                                      | 13/1133 | 126/29008 | 0.0013271 | 0.008366  | 0.005604  |
| GO:0043123 | BP | GO:0043123 | positive regulation of I-kappaB kinase/NF-kappaB signaling     | 13/1133 | 126/29008 | 0.0013271 | 0.008366  | 0.005604  |
| GO:0003236 | BP | GO:0003236 | cell chemotaxis                                                | 24/1133 | 312/29008 | 0.0013341 | 0.008401  | 0.005627  |
| GO:0002367 | BP | GO:0002367 | cytokine production involved in immune response                | 12/1133 | 111/29008 | 0.001340  | 0.008417  | 0.005638  |
| GO:0071482 | BP | GO:0071482 | cellular response to light stimulus                            | 12/1133 | 111/29008 | 0.001340  | 0.008417  | 0.005638  |
| GO:0007035 | BP | GO:0007035 | vacuolar acidification                                         | 5/1133  | 22/29008  | 0.001361  | 0.008538  | 0.005719  |
| GO:0006261 | BP | GO:0006261 | DNA-dependent DNA replication                                  | 14/1133 | 142/29008 | 0.001372  | 0.008585  | 0.005750  |
| GO:0048675 | BP | GO:0048675 | axon extension                                                 | 14/1133 | 142/29008 | 0.001372  | 0.008585  | 0.005750  |
| GO:0016482 | BP | GO:0016482 | cytosolic transport                                            | 15/1133 | 158/29008 | 0.001381  | 0.008630  | 0.005780  |
| GO:0030041 | BP | GO:0030041 | actin filament polymerization                                  | 17/1133 | 191/29008 | 0.001401  | 0.008748  | 0.005859  |
| GO:0002706 | BP | GO:0002706 | regulation of lymphocyte mediated immunity                     | 19/1133 | 225/29008 | 0.001413  | 0.008800  | 0.005894  |
| GO:0009206 | BP | GO:0009206 | purine ribonucleoside triphosphate biosynthetic process        | 9/1133  | 69/29008  | 0.001414  | 0.008800  | 0.005894  |
| GO:0032507 | BP | GO:0032507 | maintenance of protein location in cell                        | 9/1133  | 69/29008  | 0.001414  | 0.008800  | 0.005894  |
| GO:0002209 | BP | GO:0002209 | behavioral defense response                                    | 8/1133  | 56/29008  | 0.001420  | 0.008801  | 0.005895  |
| GO:0034340 | BP | GO:0034340 | response to type I interferon                                  | 8/1133  | 56/29008  | 0.001420  | 0.008801  | 0.005895  |
| GO:1901861 | BP | GO:1901861 | regulation of muscle tissue development                        | 8/1133  | 56/29008  | 0.001420  | 0.008801  | 0.005895  |
| GO:0010389 | BP | GO:0010389 | regulation of G2/M transition of mitotic cell cycle            | 11/1133 | 97/29008  | 0.001421  | 0.008803  | 0.005896  |
| GO:0001906 | BP | GO:0001906 | cell killing                                                   | 21/1133 | 260/29008 | 0.001430  | 0.008843  | 0.005923  |
| GO:140014  | BP | GO:140014  | mitotic nuclear division                                       | 22/1133 | 278/29008 | 0.001450  | 0.008960  | 0.006011  |
| GO:0031397 | BP | GO:0031397 | negative regulation of protein ubiquitination                  | 10/1133 | 83/29008  | 0.001456  | 0.008986  | 0.006019  |
| GO:0003048 | BP | GO:0003048 | bone development                                               | 20/1133 | 243/29008 | 0.001465  | 0.009030  | 0.006048  |
| GO:0046328 | BP | GO:0046328 | regulation of JNK cascade                                      | 14/1133 | 143/29008 | 0.001467  | 0.009033  | 0.006051  |
| GO:0030219 | BP | GO:0030219 | megakaryocyte differentiation                                  | 7/1133  | 44/29008  | 0.001472  | 0.009042  | 0.006056  |
| GO:0072599 | BP | GO:0072599 | establishment of protein localization to endoplasmic reticulum | 7/1133  | 44/29008  | 0.001472  | 0.009042  | 0.006056  |
| GO:0010810 | BP | GO:0010810 | regulation of cell-substrate adhesion                          | 19/1133 | 226/29008 | 0.001488  | 0.009119  | 0.006108  |
| GO:0030595 | BP | GO:0030595 | leukocyte chemotaxis                                           | 19/1133 | 226/29008 | 0.001488  | 0.009119  | 0.006108  |
| GO:0110053 | BP | GO:0110053 | regulation of actin filament organization                      | 22/1133 | 279/29008 | 0.001518  | 0.009292  | 0.006224  |
| GO:0001952 | BP | GO:0001952 | regulation of cell-matrix adhesion                             | 13/1133 | 128/29008 | 0.001533  | 0.009372  | 0.006277  |
| GO:0030516 | BP | GO:0030516 | regulation of axon extension                                   | 12/1133 | 113/29008 | 0.001565  | 0.009531  | 0.006384  |
| GO:0009145 | BP | GO:0009145 | purine nucleoside triphosphate biosynthetic process            | 9/1133  | 70/29008  | 0.001568  | 0.009531  | 0.006384  |
| GO:0090316 | BP | GO:0090316 | positive regulation of intracellular protein transport         | 14/1133 | 144/29008 | 0.001568  | 0.009531  | 0.006384  |
| GO:0032786 | BP | GO:0032786 | positive regulation of DNA-templated transcription, elongation | 6/1133  | 33/29008  | 0.001568  | 0.009531  | 0.006384  |
| GO:0150117 | BP | GO:0150117 | positive regulation of cell-substrate junction organization    | 6/1133  | 33/29008  | 0.001568  | 0.009531  | 0.006384  |
| GO:0007568 | BP | GO:0007568 | aging                                                          | 21/1133 | 262/29008 | 0.001571  | 0.009531  | 0.006384  |
| GO:0032886 | BP | GO:0032886 | regulation of microtubule-based process                        | 21/1133 | 262/29008 | 0.001571  | 0.009531  | 0.006384  |
| GO:0050769 | BP | GO:0050769 | positive regulation of neurogenesis                            | 23/1133 | 298/29008 | 0.001591  | 0.009642  | 0.006458  |
| GO:0031529 | BP | GO:0031529 | ruffle organization                                            | 8/1133  | 57/29008  | 0.001596  | 0.009648  | 0.006482  |
| GO:0006809 | BP | GO:0006809 | nitric oxide biosynthetic process                              | 10/1133 | 84/29008  | 0.001596  | 0.009648  | 0.006482  |
| GO:0042157 | BP | GO:0042157 | lipoprotein metabolic process                                  | 13/1133 | 129/29008 | 0.001645  | 0.009923  | 0.006653  |
| GO:0030111 | BP | GO:0030111 | regulation of Wnt signaling pathway                            | 24/1133 | 317/29008 | 0.001651  | 0.009945  | 0.006682  |
| GO:0051222 | BP | GO:0051222 | positive regulation of protein transport                       | 24/1133 | 317/29008 | 0.001651  | 0.009945  | 0.006682  |
| GO:0022626 | CC | GO:0022626 | cytosolic ribosome                                             | 46/1136 | 114/28886 | 1.34E-34  | 8.24E-32  | 5.16E-32  |
| GO:0005840 | CC | GO:0005840 | ribosome                                                       | 57/1136 | 239/28886 | 1.36E-28  | 6.82E-26  | 2.27E-26  |
| GO:0044391 | CC | GO:0044391 | ribosomal subunit                                              | 52/1136 | 197/28886 | 1.77E-28  | 6.82E-26  | 2.27E-26  |
| GO:0022627 | CC | GO:0022627 | cytosolic small ribosomal subunit                              | 23/1136 | 47/28886  | 2.51E-20  | 3.86E-18  | 2.42E-18  |
| GO:0015935 | CC | GO:0015935 | small ribosomal subunit                                        | 28/1136 | 80/28886  | 1.33E-19  | 1.63E-17  | 1.02E-17  |
| GO:0022625 | CC | GO:0022625 | cytosolic large ribosomal subunit                              | 24/1136 | 63/28886  | 5.34E-18  | 5.47E-16  | 3.43E-16  |
| GO:0005844 | CC | GO:0005844 | polysome                                                       | 24/1136 | 77/28886  | 1.1E-15   | 9.68E-14  | 6.06E-14  |
| GO:0016607 | CC | GO:0016607 | nuclear speck                                                  | 50/1136 | 343/28886 | 1.34E-15  | 1.02E-13  | 6.47E-14  |
| GO:0035770 | CC | GO:0035770 | ribonucleoprotein granule                                      | 40/1136 | 250/28886 | 4.2E-14   | 2.87E-12  | 1.8E-12   |
| GO:0042788 | CC | GO:0042788 | polysomal ribosome                                             | 16/1136 | 35/28886  | 9.92E-14  | 3.64E-12  | 2.28E-12  |
| GO:0036464 | CC | GO:0036464 | cytoplasmic ribonucleoprotein granule                          | 38/1136 | 232/28886 | 8.48E-14  | 4.74E-12  | 2.97E-12  |
| GO:0015934 | CC | GO:0015934 | large ribosomal subunit                                        | 27/1136 | 122/28886 | 2.06E-13  | 1.06E-11  | 6.61E-12  |
| GO:0005635 | CC | GO:0005635 | nuclear envelope                                               | 49/1136 | 423/28886 | 1.66E-11  | 7.86E-10  | 4.92E-10  |
| GO:0031248 | CC | GO:0031248 | protein acetyltransferase complex                              | 20/1136 | 90/28886  | 2.47E-10  | 1.01E-08  | 6.35E-09  |
| GO:1902493 | CC | GO:1902493 | acetyltransferase complex                                      | 20/1136 | 90/28886  | 2.47E-10  | 1.01E-08  | 6.35E-09  |
| GO:0043209 | CC | GO:0043209 | myelin sheath                                                  | 30/1136 | 215/28886 | 1.88E-09  | 7.23E-08  | 4.53E-08  |
| GO:0005667 | CC | GO:0005667 | transcription regulator complex                                | 48/1136 | 475/28886 | 2.76E-09  | 9.99E-08  | 6.26E-08  |
| GO:0010494 | CC | GO:0010494 | cytoplasmic stress granule                                     | 17/1136 | 74/28886  | 3.16E-09  | 1.08E-07  | 6.76E-08  |
| GO:0005774 | CC | GO:0005774 | vacuolar membrane                                              | 30/1136 | 228/28886 | 7.61E-09  | 2.46E-07  | 1.54E-07  |
| GO:0034399 | CC | GO:0034399 | nuclear periphery                                              | 20/1136 | 115/28886 | 2.22E-08  | 6.83E-07  | 4.28E-07  |
| GO:0031965 | CC | GO:0031965 | nuclear membrane                                               | 30/1136 | 241/28886 | 2.76E-08  | 8.07E-07  | 5.06E-07  |
| GO:0016605 | CC | GO:0016605 | PML body                                                       | 16/1136 | 76/28886  | 3.46E-08  | 9.68E-07  | 6.06E-07  |
| GO:0030139 | CC | GO:0030139 | endocytic vesicle                                              | 27/1136 | 205/28886 | 4.14E-08  | 1.11E-06  | 6.93E-07  |
| GO:0031300 | CC | GO:0031300 | intrinsic component of organelle membrane                      | 37/1136 | 366/28886 | 1.77E-07  | 4.54E-06  | 2.84E-06  |
| GO:0061695 | CC | GO:0061695 | transferase complex, transferring phosphorus-containing groups | 28/1136 | 242/28886 | 3.68E-07  | 8.81E-06  | 5.52E-06  |
| GO:0031301 | CC | GO:0031301 | integral component of organelle membrane                       | 35/1136 | 346/28886 | 3.72E-07  | 8.81E-06  | 5.52E-06  |
| GO:0005776 | CC | GO:0005776 | autophagosome                                                  | 14/1136 | 75/28886  | 1.17E-06  | 2.86E-05  | 1.66E-05  |
| GO:0031414 | CC | GO:0031414 | N-terminal protein acetyltransferase complex                   | 6/1136  | 11/28886  | 1.42E-06  | 3.13E-05  | 1.96E-05  |
| GO:0016363 | CC | GO:0016363 | nuclear matrix                                                 | 15/1136 | 89/28886  | 1.89E-06  | 4.02E-05  | 2.52E-05  |
| GO:0045335 | CC | GO:0045335 | phagocytic vesicle                                             | 17/1136 | 113/28886 | 2.06E-06  | 4.22E-05  | 2.64E-05  |
| GO:0005681 | CC | GO:0005681 | spliceosomal complex                                           | 24/1136 | 206/28886 | 2.18E-06  | 4.3E-05   | 2.69E-05  |
| GO:0000123 | CC | GO:0000123 | histone acetyltransferase complex                              | 14/1136 | 79/28886  | 2.23E-06  | 4.3E-05   | 2.69E-05  |
| GO:0098562 | CC | GO:0098562 | cytoplasmic side of membrane                                   | 23/1136 | 194/28886 | 2.61E-06  | 4.86E-05  | 3.05E-05  |
| GO:0001650 | CC | GO:0001650 | fibrillar center                                               | 19/1136 | 142/28886 | 3.21E-06  | 5.8E-05   | 3.63E-05  |
| GO:0000932 | CC | GO:0000932 | P-body                                                         | 14/1136 | 83/28886  | 4.1E-06   | 7.21E-05  | 4.52E-05  |
| GO:0005684 | CC | GO:0005684 | U2-type spliceosomal complex                                   | 15/1136 | 95/28886  | 4.4E-06   | 7.51E-05  | 4.7E-05   |
| GO:0008023 | CC | GO:0008023 | transcription elongation factor complex                        | 11/1136 | 53/28886  | 5.54E-06  | 9.21E-05  | 5.77E-05  |
| GO:0070603 | CC | GO:0070603 | SWI/SNF superfamily-type complex                               | 13/1136 | 75/28886  | 6.6E-06   | 0.0001061 | 6.69E-05  |
| GO:1904949 | CC | GO:1904949 | ATPase complex                                                 | 13/1136 | 76/28886  | 7.68E-06  | 0.000121  | 7.59E-05  |
| GO:0019866 | CC | GO:0019866 | organelle inner membrane                                       | 41/1136 | 500/28886 | 8.81E-06  | 0.000135  | 8.49E-05  |
| GO:0034708 | CC | GO:0034708 | methyltransferase complex                                      | 15/1136 | 101/28886 | 9.51E-06  | 0.000141  | 8.88E-05  |
| GO:0001726 | CC | GO:0001726 | ruffle                                                         | 19/1136 | 153/28886 | 9.68E-06  | 0.000141  | 8.88E-05  |
| GO:0032279 | CC | GO:0032279 | asymmetric synapse                                             | 31/1136 | 337/28886 | 1.19E-05  | 0.000164  | 0.000102  |
| GO:0016234 | CC | GO:0016234 | inclusion body                                                 | 13/1136 | 79/28886  | 1.19E-05  | 0.000164  | 0.000102  |
| GO:0005769 | CC | GO:0005769 | early endosome                                                 | 30/1136 | 321/28886 | 1.2E-05   | 0.000164  | 0.000102  |
| GO:0030684 | CC | GO:0030684 | prebosome                                                      | 13/1136 | 80/28886  | 1.37E-05  | 0.000183  | 0.000114  |
| GO:0140534 | CC | GO:0140534 | endoplasmic reticulum protein-containing complex               | 17/1136 | 130/28886 | 1.42E-05  | 0.000185  | 0.000116  |
| GO:0090575 | CC | GO:0090575 | RNA polymerase II transcription regulator complex              | 20/1136 | 172/28886 | 1.54E-05  | 0.000196  | 0.000123  |
| GO:0014069 | CC | GO:0014069 | postsynaptic density                                           | 30/1136 | 328/28886 | 1.82E-05  | 0.000228  | 0.000143  |
| GO:0071013 | CC | GO:0071013 | catalytic step 2 spliceosome                                   | 14/1136 | 95/28886  | 2.05E-05  | 0.000251  | 0.000157  |
| GO:0000139 | CC | GO:0000139 | Golgi membrane                                                 | 26/1136 | 267/28886 | 2.21E-05  | 0.000267  | 0.000167  |
| GO:0009898 | CC | GO:0009898 | cytoplasmic side of plasma membrane                            | 20/1136 | 177/28886 | 2.34E-05  | 0.000273  | 0.000171  |
| GO:1902554 | CC | GO:1902554 | serine/threonine protein kinase complex                        | 13/1136 | 84/28886  | 2.35E-05  | 0.000273  | 0.000171  |
| GO:0098572 | CC | GO:0098572 | postsynaptic specialization                                    | 31/1136 | 351/28886 | 2.63E-05  | 0.000299  | 0.000187  |
| GO:0016514 | CC | GO:0016514 | SWI/SNF complex                                                | 6/1136  | 17/28886  | 3.11E-05  | 0.000347  | 0.000217  |
| GO:0005770 | CC | GO:0005770 | late endosome                                                  | 24/1136 | 242/28886 | 3.36E-05  | 0.000369  | 0.000231  |
| GO:0030496 | CC |            |                                                                |         |           |           |           |           |

|            |    |            |                                                                          |         |           |           |           |           |
|------------|----|------------|--------------------------------------------------------------------------|---------|-----------|-----------|-----------|-----------|
| GO:0000791 | CC | GO:0000791 | euchromatin                                                              | 8/1136  | 46/28886  | 0.0003851 | 0.0026841 | 0.0016811 |
| GO:0005767 | CC | GO:0005767 | secondary lysosome                                                       | 5/1136  | 17/28886  | 0.0003889 | 0.0026841 | 0.0016811 |
| GO:0005801 | CC | GO:0005801 | cis-Golgi network                                                        | 10/1136 | 73/28886  | 0.0005561 | 0.0030651 | 0.0023841 |
| GO:0008287 | CC | GO:0008287 | protein serine/threonine phosphatase complex                             | 8/1136  | 49/28886  | 0.0005999 | 0.0040096 | 0.0025111 |
| GO:1902293 | CC | GO:1902293 | phosphatase complex                                                      | 8/1136  | 49/28886  | 0.0005999 | 0.0040096 | 0.0025111 |
| GO:0042611 | CC | GO:0042611 | MHC protein complex                                                      | 7/1136  | 38/28886  | 0.0006181 | 0.0040921 | 0.0025631 |
| GO:0072686 | CC | GO:0072686 | mitotic spindle                                                          | 16/1136 | 161/28886 | 0.0006371 | 0.0041711 | 0.0026131 |
| GO:1905368 | CC | GO:1905368 | peptidase complex                                                        | 12/1136 | 102/28886 | 0.0006711 | 0.0043341 | 0.0027151 |
| GO:0032045 | CC | GO:0032045 | guanyl-nucleotide exchange factor complex                                | 5/1136  | 19/28886  | 0.0006831 | 0.0043341 | 0.0027151 |
| GO:1902773 | CC | GO:1902773 | GTPase activator complex                                                 | 5/1136  | 19/28886  | 0.0006831 | 0.0043341 | 0.0027151 |
| GO:0032993 | CC | GO:0032993 | protein-DNA complex                                                      | 16/1136 | 163/28886 | 0.0007291 | 0.0045771 | 0.0028671 |
| GO:0005759 | CC | GO:0005759 | mitochondrial matrix                                                     | 23/1136 | 280/28886 | 0.0007601 | 0.0047231 | 0.0029591 |
| GO:0033106 | CC | GO:0033106 | cis-Golgi network membrane                                               | 6/1136  | 29/28886  | 0.0007791 | 0.0049001 | 0.0030691 |
| GO:0009803 | CC | GO:0009803 | sex chromosome                                                           | 7/1136  | 40/28886  | 0.0008531 | 0.0051751 | 0.0032421 |
| GO:0005052 | CC | GO:0005052 | proteasome complex                                                       | 9/1136  | 64/28886  | 0.0008561 | 0.0051751 | 0.0032421 |
| GO:0071564 | CC | GO:0071564 | npBAF complex                                                            | 4/1136  | 12/28886  | 0.0009114 | 0.0054581 | 0.0034191 |
| GO:0032806 | CC | GO:0032806 | carboxy-terminal domain protein kinase complex                           | 5/1136  | 21/28886  | 0.0011201 | 0.0062621 | 0.0041511 |
| GO:0031228 | CC | GO:0031228 | intrinsic component of Golgi membrane                                    | 8/1136  | 54/28886  | 0.0011631 | 0.0068171 | 0.0042701 |
| GO:0005657 | CC | GO:0005657 | replication fork                                                         | 9/1136  | 67/28886  | 0.0011991 | 0.0069621 | 0.0043611 |
| GO:0019908 | CC | GO:0019908 | nuclear cyclin-dependent protein kinase holoenzyme complex               | 4/1136  | 13/28886  | 0.0012791 | 0.0073061 | 0.0045781 |
| GO:0019898 | CC | GO:0019898 | extrinsic component of membrane                                          | 24/1136 | 309/28886 | 0.0012831 | 0.0073061 | 0.0045781 |
| GO:0030134 | CC | GO:0030134 | COPII-coated ER to Golgi transport vesicle                               | 8/1136  | 55/28886  | 0.0013151 | 0.0074231 | 0.0046501 |
| GO:0001741 | CC | GO:0001741 | XY body                                                                  | 5/1136  | 22/28886  | 0.0014031 | 0.0077771 | 0.0048711 |
| GO:0035145 | CC | GO:0035145 | exon-exon junction complex                                               | 5/1136  | 22/28886  | 0.0014031 | 0.0077771 | 0.0048711 |
| GO:0031256 | CC | GO:0031256 | leading edge membrane                                                    | 15/1136 | 158/28886 | 0.0014761 | 0.0081081 | 0.0050791 |
| GO:1905369 | CC | GO:1905369 | endopeptidase complex                                                    | 9/1136  | 70/28886  | 0.0016431 | 0.0089461 | 0.0056041 |
| GO:0030662 | CC | GO:0030662 | coated vesicle membrane                                                  | 10/1136 | 84/28886  | 0.0016781 | 0.0090591 | 0.0056751 |
| GO:0190034 | CC | GO:0190034 | distal axon                                                              | 27/1136 | 371/28886 | 0.0017241 | 0.0092021 | 0.0057641 |
| GO:0005652 | CC | GO:0005652 | nuclear lamina                                                           | 4/1136  | 14/28886  | 0.0017351 | 0.0092021 | 0.0057641 |
| GO:0003735 | MF | GO:0003735 | structural constituent of ribosome                                       | 52/1102 | 166/28438 | 7.76E-33  | 6.66E-30  | 4.79E-30  |
| GO:0044389 | MF | GO:0044389 | ubiquitin-like protein ligase binding                                    | 65/1102 | 330/28438 | 1.13E-27  | 4.84E-25  | 3.48E-25  |
| GO:0031625 | MF | GO:0031625 | ubiquitin protein ligase binding                                         | 62/1102 | 313/28438 | 1.37E-26  | 3.82E-24  | 2.82E-24  |
| GO:0140297 | MF | GO:0140297 | DNA-binding transcription factor binding                                 | 67/1102 | 431/28438 | 2.19E-22  | 4.7E-20   | 3.39E-20  |
| GO:003729  | MF | GO:003729  | mRNA binding                                                             | 59/1102 | 366/28438 | 1.2E-20   | 2.06E-18  | 1.48E-18  |
| GO:0061629 | MF | GO:0061629 | RNA polymerase II-specific DNA-binding transcription factor binding      | 55/1102 | 329/28438 | 4.39E-20  | 6.28E-18  | 4.52E-18  |
| GO:0003712 | MF | GO:0003712 | transcription coregulator activity                                       | 61/1102 | 480/28438 | 3.77E-16  | 4.62E-14  | 3.32E-14  |
| GO:0030695 | MF | GO:0030695 | GTPase regulator activity                                                | 52/1102 | 421/28438 | 1.84E-13  | 1.75E-11  | 1.26E-11  |
| GO:0060589 | MF | GO:0060589 | nucleoside-triphosphatase regulator activity                             | 52/1102 | 421/28438 | 1.84E-13  | 1.75E-11  | 1.26E-11  |
| GO:0051082 | MF | GO:0051082 | unfolded protein binding                                                 | 23/1102 | 88/28438  | 2.13E-13  | 1.75E-11  | 1.26E-11  |
| GO:0019787 | MF | GO:0019787 | ubiquitin-like protein transferase activity                              | 53/1102 | 437/28438 | 2.24E-13  | 1.75E-11  | 1.26E-11  |
| GO:0004942 | MF | GO:0004942 | ubiquitin-protein transferase activity                                   | 51/1102 | 415/28438 | 3.83E-13  | 2.74E-11  | 1.97E-11  |
| GO:0005096 | MF | GO:0005096 | GTPase activator activity                                                | 50/1102 | 405/28438 | 5.48E-13  | 3.62E-11  | 2.6E-11   |
| GO:0042393 | MF | GO:0042393 | histone binding                                                          | 40/1102 | 287/28438 | 2.55E-12  | 1.56E-10  | 1.12E-10  |
| GO:0016922 | MF | GO:0016922 | nuclear receptor binding                                                 | 28/1102 | 156/28438 | 9.91E-12  | 5.67E-10  | 4.07E-10  |
| GO:0005085 | MF | GO:0005085 | guanyl-nucleotide exchange factor activity                               | 31/1102 | 197/28438 | 3.23E-11  | 1.73E-09  | 1.25E-09  |
| GO:0031072 | MF | GO:0031072 | heat shock protein binding                                               | 26/1102 | 147/28438 | 8.82E-11  | 4.45E-09  | 3.2E-09   |
| GO:0051020 | MF | GO:0051020 | GTPase binding                                                           | 39/1102 | 313/28438 | 1.5E-10   | 7.13E-09  | 5.13E-09  |
| GO:0003713 | MF | GO:0003713 | transcription coactivator activity                                       | 34/1102 | 253/28438 | 2.99E-10  | 1.35E-08  | 9.72E-09  |
| GO:0003730 | MF | GO:0003730 | mRNA 3'-UTR binding                                                      | 21/1102 | 106/28438 | 6.5E-10   | 2.79E-08  | 2E-08     |
| GO:0061659 | MF | GO:0061659 | ubiquitin-like protein ligase activity                                   | 38/1102 | 321/28438 | 1.12E-09  | 4.9E-08   | 3.3E-08   |
| GO:0061630 | MF | GO:0061630 | ubiquitin protein ligase activity                                        | 37/1102 | 310/28438 | 1.48E-09  | 5.76E-08  | 4.14E-08  |
| GO:0031267 | MF | GO:0031267 | small GTPase binding                                                     | 34/1102 | 277/28438 | 3.3E-09   | 1.23E-07  | 8.85E-08  |
| GO:0008022 | MF | GO:0008022 | protein C-terminus binding                                               | 30/1102 | 230/28438 | 8.18E-09  | 2.92E-07  | 2.1E-07   |
| GO:0140658 | MF | GO:0140658 | ATP-dependent chromatin remodeler activity                               | 11/1102 | 31/28438  | 1.17E-08  | 4.01E-07  | 2.88E-07  |
| GO:0043021 | MF | GO:0043021 | ribonucleoprotein complex binding                                        | 24/1102 | 168/28438 | 3.67E-08  | 1.21E-06  | 8.71E-07  |
| GO:0047485 | MF | GO:0047485 | protein N-terminus binding                                               | 21/1102 | 133/28438 | 4.46E-08  | 1.42E-06  | 1.02E-06  |
| GO:0140097 | MF | GO:0140097 | catalytic activity, acting on DNA                                        | 28/1102 | 223/28438 | 4.84E-08  | 1.48E-06  | 1.07E-06  |
| GO:0001221 | MF | GO:0001221 | transcription coregulator binding                                        | 17/1102 | 90/28438  | 5.75E-08  | 1.7E-06   | 1.22E-06  |
| GO:0002039 | MF | GO:0002039 | p53 binding                                                              | 15/1102 | 78/28438  | 1.88E-07  | 5.38E-06  | 3.87E-06  |
| GO:0051787 | MF | GO:0051787 | misfolded protein binding                                                | 9/1102  | 25/28438  | 2.22E-07  | 6.15E-06  | 4.42E-06  |
| GO:0050681 | MF | GO:0050681 | androgen receptor binding                                                | 10/1102 | 33/28438  | 3.01E-07  | 8.06E-06  | 5.8E-06   |
| GO:0005543 | MF | GO:0005543 | phospholipid binding                                                     | 41/1102 | 457/28438 | 6.5E-07   | 1.89E-05  | 1.21E-05  |
| GO:0004674 | MF | GO:0004674 | protein serine/threonine kinase activity                                 | 40/1102 | 441/28438 | 6.72E-07  | 1.7E-05   | 1.22E-05  |
| GO:0046332 | MF | GO:0046332 | SMAD binding                                                             | 15/1102 | 86/28438  | 1E-06     | 2.46E-05  | 1.77E-05  |
| GO:0003714 | MF | GO:0003714 | transcription corepressor activity                                       | 23/1102 | 187/28438 | 1.07E-06  | 2.56E-05  | 1.84E-05  |
| GO:0008094 | MF | GO:0008094 | ATP-dependent activity, acting on DNA                                    | 17/1102 | 110/28438 | 1.15E-06  | 2.66E-05  | 1.91E-05  |
| GO:0044183 | MF | GO:0044183 | protein folding chaperone                                                | 10/1102 | 38/28438  | 1.29E-06  | 2.91E-05  | 2.09E-05  |
| GO:0019207 | MF | GO:0019207 | kinase regulator activity                                                | 25/1102 | 229/28438 | 3.39E-06  | 7.45E-05  | 5.36E-05  |
| GO:0108310 | MF | GO:0108310 | protein serine kinase activity                                           | 26/1102 | 246/28438 | 3.98E-06  | 8.38E-05  | 6.03E-05  |
| GO:0003725 | MF | GO:0003725 | double-stranded RNA binding                                              | 14/1102 | 84/28438  | 4.01E-06  | 8.38E-05  | 6.03E-05  |
| GO:0090079 | MF | GO:0090079 | translation regulator activity, nucleic acid binding                     | 16/1102 | 108/28438 | 4.15E-06  | 8.47E-05  | 6.09E-05  |
| GO:0051087 | MF | GO:0051087 | chaperone binding                                                        | 16/1102 | 109/28438 | 4.69E-06  | 9.36E-05  | 6.73E-05  |
| GO:0016410 | MF | GO:0016410 | N-acetyltransferase activity                                             | 15/1102 | 99/28438  | 6.21E-06  | 0.0001211 | 8.7E-05   |
| GO:0004388 | MF | GO:0004388 | helicase activity                                                        | 19/1102 | 151/28438 | 6.48E-06  | 0.0001231 | 8.88E-05  |
| GO:0051721 | MF | GO:0051721 | protein phosphatase 2A binding                                           | 9/1102  | 37/28438  | 8.9E-06   | 0.0001661 | 0.0001191 |
| GO:0046982 | MF | GO:0046982 | protein heterodimerization activity                                      | 29/1102 | 307/28438 | 1.03E-05  | 0.0001881 | 0.0001351 |
| GO:0019902 | MF | GO:0019902 | phosphatase binding                                                      | 24/1102 | 230/28438 | 1.14E-05  | 0.0002041 | 0.0001461 |
| GO:0048156 | MF | GO:0048156 | tau protein binding                                                      | 7/1102  | 22/28438  | 1.32E-05  | 0.0002281 | 0.0001641 |
| GO:0140030 | MF | GO:0140030 | modification-dependent protein binding                                   | 22/1102 | 202/28438 | 1.33E-05  | 0.0002281 | 0.0001641 |
| GO:0032182 | MF | GO:0032182 | ubiquitin-like protein binding                                           | 15/1102 | 106/28438 | 1.45E-05  | 0.0002441 | 0.0001751 |
| GO:0001046 | MF | GO:0001046 | core promoter sequence-specific DNA binding                              | 10/1102 | 49/28438  | 1.52E-05  | 0.0002501 | 0.0001801 |
| GO:0030331 | MF | GO:0030331 | estrogen receptor binding                                                | 10/1102 | 50/28438  | 1.83E-05  | 0.0002911 | 0.0002091 |
| GO:0034212 | MF | GO:0034212 | peptide N-acetyltransferase activity                                     | 10/1102 | 50/28438  | 1.83E-05  | 0.0002911 | 0.0002091 |
| GO:0003743 | MF | GO:0003743 | translation initiation factor activity                                   | 11/1102 | 61/28438  | 1.99E-05  | 0.0003041 | 0.0002191 |
| GO:0070063 | MF | GO:0070063 | RNA polymerase binding                                                   | 11/1102 | 61/28438  | 1.99E-05  | 0.0003041 | 0.0002191 |
| GO:0019903 | MF | GO:0019903 | protein phosphatase binding                                              | 20/1102 | 182/28438 | 2.85E-05  | 0.0004141 | 0.0002981 |
| GO:0032183 | MF | GO:0032183 | SUMO binding                                                             | 6/1102  | 17/28438  | 2.86E-05  | 0.0004141 | 0.0002981 |
| GO:0043422 | MF | GO:0043422 | protein kinase B binding                                                 | 6/1102  | 17/28438  | 2.86E-05  | 0.0004141 | 0.0002981 |
| GO:0051019 | MF | GO:0051019 | mitogen-activated protein kinase binding                                 | 8/1102  | 33/28438  | 2.9E-05   | 0.0004141 | 0.0002981 |
| GO:0008080 | MF | GO:0008080 | N-acetyltransferase activity                                             | 12/1102 | 75/28438  | 2.96E-05  | 0.0004161 | 0.0002991 |
| GO:1900782 | MF | GO:1900782 | protein tyrosine kinase binding                                          | 15/1102 | 113/28438 | 3.15E-05  | 0.0004351 | 0.0003131 |
| GO:0045182 | MF | GO:0045182 | translation regulator activity                                           | 17/1102 | 141/28438 | 3.42E-05  | 0.0004651 | 0.0003341 |
| GO:0008135 | MF | GO:0008135 | translation factor activity, RNA binding                                 | 13/1102 | 90/28438  | 4.27E-05  | 0.0005721 | 0.0004111 |
| GO:0042826 | MF | GO:0042826 | histone deacetylase binding                                              | 16/1102 | 132/28438 | 5.39E-05  | 0.0007111 | 0.0005111 |
| GO:0016887 | MF | GO:0016887 | ATP hydrolysis activity                                                  | 22/1102 | 223/28438 | 6.12E-05  | 0.0007951 | 0.0005711 |
| GO:0097718 | MF | GO:0097718 | disordered domain specific binding                                       | 8/1102  | 37/28438  | 7.03E-05  | 0.0008991 | 0.0006461 |
| GO:0046966 | MF | GO:0046966 | thyroid hormone receptor binding                                         | 7/1102  | 28/28438  | 7.46E-05  | 0.0009401 | 0.0006761 |
| GO:0001227 | MF | GO:0001227 | DNA-binding transcription repressor activity, RNA polymerase II-specific | 28/1102 | 328/28438 | 8.86E-05  | 0.0011011 | 0.0007921 |
| GO:00314   |    |            |                                                                          |         |           |           |           |           |



|            |    |            |                                   |        |          |           |           |           |
|------------|----|------------|-----------------------------------|--------|----------|-----------|-----------|-----------|
| GO:1990226 | MF | GO:1990226 | histone methyltransferase binding | 4/1102 | 13/28438 | 0.0012111 | 0.0092771 | 0.0066691 |
| GO:1990405 | MF | GO:1990405 | protein antigen binding           | 4/1102 | 13/28438 | 0.0012111 | 0.0092771 | 0.0066691 |
| GO:0042288 | MF | GO:0042288 | MHC class I protein binding       | 7/1102 | 43/28438 | 0.0012231 | 0.0092891 | 0.0066781 |
| GO:0070182 | MF | GO:0070182 | DNA polymerase binding            | 5/1102 | 22/28438 | 0.0013141 | 0.0098921 | 0.0071121 |



|                                                                                                                                                                                                     |    |
|-----------------------------------------------------------------------------------------------------------------------------------------------------------------------------------------------------|----|
| Dnaja1/Foxp1/Pges3/Rnf18/Nrc21/Fkbp4/Parp1/Sirt1/Daxx/Ep300/Drgk1/Lbh/Cnot1/Arf1/Per1/Ncoa2/Cnot2/Safb/Cair                                                                                         | 19 |
| Kf2/Hsp90ab1/Kf4/Zp36/Smad7/Mul1/At2b1/Lapm5/Rel/Inpp5d/Rnf125/Crebbp/Nmi/Parp1/Sirt1/Crb2/Ant2/Bank1/Nrk11/Spa/Cd2ap/Sars/C1qbp/Rabgef1/Ccr7/Cd200/Bst2/Irak3/Relb/Pmi/Zc3h12a/Ptrpr/Bcl6          | 33 |
| Jun/Zfp36/Ef3/Ef3a/Chd1/Sp100/Rel1/Ep300/Cnt2/Inpp5k/Snr1/Cde1/Sp1/Ttim11/Nucks1                                                                                                                    | 15 |
| Gapdh/Zfp36/Rp13a/Rc3h2/Rps3/Dhx36/Ddx4/Zfp362/Ce1f1/Bank1/Rock1/Ef2ak3/Tnrc6a/Bmi1/Cnot1/Pan3/Cnot2/Rn3/Yhdh3/Ef4e2/Larp1/Tnrc6c/Pmi/Zc3h12a/Apoe/Cair/Tnrc6b                                      | 27 |
| Jun/Hsp90aa1/Fos/Nkbia/Mef2c/Foxp1/Zfp36/Gpr171/Smad7/Syk/Rc3h2/Pcid2/Clec2d/Inpp5d/Hspb1/Sar1/Kf10/Malt1/Myc/Ets1/Zfp362/Nkbid/Ldb1/Sh2b3/Pipr2/Hax1/Stat1/Pk3r1/Ciptm1/It4ra/Hspa9b/Ctnnb1/Ccr7/F | 40 |
| Phf14/Artd5a/Atf2/Morf42/Naas50/Pxip1/Crebbp/H4/Sirt1/Ldb1/Phf20/Ep300/Ogt/Mecp2/lws1/Per1/Brd8/Epc1/Ep400/Fcn/Kmt2a/Phf20/1/Kat5a                                                                  | 23 |
| Zfp36/Rc3h2/Pcid2/Dhx36/Lmd2/Pabpc4/Kyru/Ahcy/Zfp362/Ce1f1/Hnmpa0/Ef3a/Smg5/Smg1/Npm1/Zc3hav1/N5c/Cde1/Taf15/Rock1/Casc3/Magoh/Tnrc6a/Cnot1/Pan3/Myd88/Sid2/Cnot2/Yhdh3/Fus/Rnaset2a/Larp1/         | 23 |
| Ppp1r15a/Elf1/Rp13a/Elf3k/Ppp1r15b/Tmed2/Elf4g2/Npm1/Bank1/Elf2ak3/Larp1/Rps6kb1/Pmi/Dnajc3                                                                                                         | 41 |
| Zfp36/Rc3h2/Pcid2/Dhx36/Zfp362/Elf3e/Smg5/Smg1/Cde1/Casc3/Magoh/Tnrc6a/Cnot1/Pan3/Cnot2/Tnrc6c/Secisbp2/Zc3h12a/Tnrc6b                                                                              | 19 |
| Jun/Zfp36/Atf2/Pmaip1/Kf10/Hnmp1/Bcl2/Sirt1/Foxo1/Pik3c3/Nfe2l2/Gabarap/Sik2/Pkag1/Pk3r4/Elf2ak3/Tnrc6a/Fnip1/Hgd1a/Larp1/Wpi2/Map1c3a/Fcn/Zc3h12a                                                  | 25 |
| Dnaja1/Foxp1/Zfp36/Akap13/Pges3/Rnf18/Nrc21/Fkbp4/Parp1/Sirt1/Zfp362/Tb11v/Daxx/Ep300/Drgk1/Lbh/Cnot1/Arf1/Per1/Ncoa2/Pk3r1/Cnot2/Rps6kb1/Crebr1/Safb/Cair                                          | 38 |
| Hsp41/Mef2c/Syk/Satb1/Rs2/Rc3h2/H2-Ab1/Rps3/Lapm5/Inpp5d/Toig1/Malt1/Dhps/Rasa3/SH2b3/Bcl2/Ich/Siglecq/Cblb/Tnfrsf13c/Fkbp1a/Btla/Cd55/Cd86/Cnd3/Dock8/Myd88/Hst/Cd19/Ctnnb1/Ccr7/Dock2/Cd81/F      | 27 |
| Hspa1a/Hspa1b/Ubb/Hsp90ab1/Rps7/Smad7/Gpx1/Lapm5/Arh1/Tmem259/Cenk1d/Xpo1/Cank2a1/Gabarap/Drgk1/Smarrc1/Ogt/Usf7/Herpud1/Zfand2a/Dnajb2/Chfr/Pten/Arh2/Pmi/Apoe/Usp19                               | 27 |
| Zfp36/Rc3h2/Pcid2/Dhx36/Lmd2/Pabpc4/Kyru/Ahcy/Zfp362/Ce1f1/Hnmpa0/Ef3a/Exrn1/Smg5/Smg1/Npm1/Zc3hav1/N5c/Cde1/Taf15/Rock1/Casc3/Magoh/Tnrc6a/Cnot1/Pan3/Myd88/Sid2/Cnot2/Yhdh3/Fus/Rnaset2a          | 42 |
| Dnaja1/Hsp41/Gpx1/Pfaur/Tp11/Hsp41/Sgk3/Map2k1/Bcl2/Sirt1/Arnt2/Rb1cc1/Nfe2l2/Siah2/Eno1/Ghnm/Herpud1/Vns1abp/Ptg1p/Zmynd11/Birc6/Higd1a/Rnf34/Cdk11b/Ctnnb1/Fcrr/Rps6kb1/Phip/Ptpr1                | 29 |
| Rp38/Rps2/Rp24/Rp14/Rp35a/Rp7a/Wdr74/Nrk/Npm1/Rrs1/Dhx30/Nhp2/Zfp622/Pea1/Ebna1b2                                                                                                                   | 15 |
| Hsp41/Mef2c/Syk/Satb1/Rs2/Rc3h2/H2-Ab1/Rps3/Lapm5/Inpp5d/Malt1/Dhps/Rasa3/Bcl2/Ich/Siglecq/Cblb/Tnfrsf13c/Fkbp1a/Btla/Cd55/Cd86/Cnd3/Dock8/Myd88/Hst/Cd19/Ctnnb1/Ccr7/Dock2/Cd81/Msn/Ptpr           | 35 |
| Jun/Atf3/Atf2/Pmaip1/Kf10/Hnmp1/Bcl2/Sirt1/Foxo1/Pik3c3/Nfe2l2/Gabarap/Sik2/Pkag1/Pk3r4/Elf2ak3/Tnrc6a/Fnip1/Hgd1a/Wpi2/Map1c3a/Fcn/Zc3h12a                                                         | 23 |
| Hspa1b/Nk4a1/Kf4/Gpx1/Pfaur/Pcid2/Ar6p1/Arnt2/Siah2/Cank2a1/Akt2/Mical1/Herpud1/Fnip1/Rnf34/Srf/Fcrr                                                                                                | 17 |
| Zfp36/Myc1c/Pcid2/Snf7/Ret2/Rae1/Xpo1/Nup88/Nup210/lws1/Casc3/Magoh/Poldip3/Sid2/Eny2/Ranbp2/Akap8/Pabpn1/Chtop/Nxf1                                                                                | 38 |
| Hspa1b/Nk4a1/Kf4/Gpx1/Pfaur/Ar6p1/Arnt2/Siah2/Cenk2a1/Akt2/Mical1/Herpud1/Fnip1/Rnf34/Srf/Fcrr                                                                                                      | 19 |
| Hspa2/Zfp36/Rc3h2/Daxp1/Dhx36/Zfp362/Ce1f1/Srrmp70/Zc3hav1/Snr1/Rock1/Tnrc6a/Cnot1/Pan3/Cnot2/Yhdh3/Tnrc6c/Paf1/Zc3h12a/Tnrc6b                                                                      | 20 |
| Dnajb1/Kf2/Jun/Ppp1r15a/Atf3/Cited2/Egr1/Arnt/Hif1an/Nfe2l2/Elf2ak3/Bclaf1/Atf8                                                                                                                     | 13 |
| Hspa90ab1/Nkbia/Syk/Bach2/Atf2/Mtbp31/Nup50/Ipo7/Nup88/Pkag1/Kpnb1/Ppp3ca/Pttg1p/Ing1/Pk3r1/Rbnm2/Ppp2ca/Ranbp2/Trpo1/Phip/Pmi/Zc3h12a/Cse11                                                        | 24 |
| Cytl1/P2ry10/Donmd4a/Ralgap1/Akap13/Cdc42se2/Dgkz/Rasa3/Map2k1/Dynt1c/Kras/Gabarap/Camk2d/Ogt/Arfge1/Rasa2/Cd2ap/Arhgap25/Rabgef1/Dock2/Ralgs2/Dnm2/Gpr65/Fcn/Apoe/Bcl6/Arhgap26/Iqsec1             | 28 |
| Kmt2a/Arnd4/Satb1/Crebbp/Setd3/Sirt1/Mt2/Kmt2c/Ogt/Snr1/Mecp2/Ermt1/lws1/Atrx/Pax5/Rf1/Ctnnb1/Paf1/Kmt2a/Ned1/Chtop/Pmtt1                                                                           | 22 |
| Nkbia/Kf4/Sirt1/Itch/Nkbid/Arnt2/Med13/Sr/Usp7/Tax1bp1/Cebpg/Bhhd40/Faf1/Cd200/Irak3/Pel1/Chuk/Zc3h12a/Kat5a                                                                                        | 43 |
| Zfp36/Rc3h2/Pcid2/Dhx36/Lmd2/Pabpc4/Kyru/Ahcy/Zfp362/Ce1f1/Hnmpa0/Nfe2l2/Elf3e/Smg5/Smg1/Npm1/Zc3hav1/N5c/Cde1/Taf15/Rock1/Casc3/Magoh/Tnrc6a/Cnot1/Pan3/Myd88/Sid2/Cnot2/Yhdh3/Fus/Rnaset2a        | 23 |
| Kf2/Rps24/Zfp36/Rps19/Kmt2a/Rps17/Inpp5d/Tmod3/Tcaa1/Cited2/Ets1/Ldb1/Sh2b3/Pipr2/Cebpg/Stat1/Ptbp3/Hspa9b/Sp1/Bcl6/Dnase2a/Pmtt1                                                                   | 21 |
| Hspa1a/Hspa1b/Hsp90aa1/Smad7/Lapm5/Arh1/Tmem259/Cenk1d/Gabarap/Drgk1/Herpud1/Zfand2a/Dnajb2/Ptg1p/Chfr/Pten/Faf1/Atrp1/Man/Apoe                                                                     | 22 |
| Serfat1/Macf1/Foxp1/Smad7/Mul1/Atf1/Rnf18/Adam10/Bcl11a/Nrc31/Lamtora2/Bcl2/Sirt1/Elf4g2/Trf1/Ptpr1/Atf5g1/Zfyw27/Dip2b/Golga4/Npm1/Cank2a1/Elf2b2/Eno1/Mecp2/Dnajb2/Der2/Mdnl/Sfr/Sk11/Bst2/Dnm1   | 42 |
| Hsp41/Mef2c/Foxp1/Syk/Ms4a1/Rs2/H2-Ab1/Pcid2/Lapm5/Inpp5d/Toig1/Srk3gp1/Malt1/Bcl11a/Bc2/Zfp362/Siglecq/Ptpr/Nfat1/Ep300/Pkcb/Cdnf1c/Bank1/Tnfrsf13c/Dnajb2/Pipr2/Btla/Cebpg/Cd86/Fnip1/Pk3r1/Bir   | 21 |
| Hspa90/Hsp41/Foxp1/Syk/Rps19/Artd5a/Lapm5/Malt1/Myc18a/Dhx36/Sirt1/Cd84/Nkbid/H2-Q7/Ptpr/Fbox38/Dnm15/Rap1a/H2-M3/DG58/Cd55/Stat1/Ankrd17/Cd86/H2-Q6/H4a/Rabgef1/Ccr7/H2-Q4/Cd81/Ptpr/H2-           | 32 |
| Cempa/Nap111/Senp6/Rnf4/Smarc5/Sart3/Ref1/Daxx/Trf4/Npm1/Gt2a2/Cabin1/Anp32b/Atrv/Gtfn25/Ub1/Npm1/Smarc2/Nap114/Nasp/Kat5a                                                                          | 21 |
| Snf7/Sap18/Actin1/Hnmp1/Npm1/Cdk9/Cnt1/C1qbp/Ptbp3/Srf10                                                                                                                                            | 8  |
| Dnajb1/Hspa90/Hspa1/Hspa1a/Hspa1b/Hsph1/Pges3/Srt13/Hspa9b/Hspa14                                                                                                                                   | 10 |
| Hsp90aa1/Hsp41/Hsp41/Smad7/Syk/Hga4/H2-Ab1/Rps3/Pfaur/Lims1/Sart1/Malt1/Cited2/Dhps/Rasa3/Ets1/Ntkbid/Ldb1/Ptpr/H2-Eb2/Plekha2/Tnfrsf13c/Jak1/Igapp1/Cd55/Ppp3ca/Rnk1/Nat5/Cd86/C1qbp/Dock8/Hst61   | 43 |
| Dynt1c/Kras/Gabarap/Camk2d/Ogt/Elmo1/Rhob/Nisch/Dock2/Dnm2/Rhoh/Dnl1                                                                                                                                | 12 |
| Zfp36/Myc1c/Pcid2/Snf7/Ret2/Rae1/Xpo1/Npm1/Nup88/Nup210/lws1/Casc3/Magoh/Poldip3/Sid2/Eny2/Ranbp2/Akap8/Pabpn1/Chtop/Nxf1                                                                           | 21 |
| Zfp36/Myc1c/Pcid2/Snf7/Ret2/Rae1/Xpo1/Npm1/Nup88/Nup210/lws1/Casc3/Magoh/Poldip3/Sid2/Eny2/Ranbp2/Akap8/Pabpn1/Chtop/Nxf1                                                                           | 21 |
| Gapdh/Zfp36/Rp13a/Rc3h2/Rps3/Dhx36/Ddx4/Zfp362/Ce1f1/Bank1/Elf2ak3/Tnrc6a/Cnot1/Pan3/Cnot2/Rn3/Ef4e2/Larp1/Tnrc6c/Pmi/Zc3h12a/Apoe/Cair/Tnrc6b                                                      | 27 |
| Hsp41/Smad7/Syk/Rc3h2/H2-Ab1/Malt1/Rasa3/Itch/Nkbid/Cblb/Btla/Cd55/H4a/Ccr7/Cd81/Zc3h12a/Ptrpr/Bcl6                                                                                                 | 18 |
| Ubb/Birc3/Rps2/Smad7/Lapm5/Nmi/Ube2d1/Cblb/Npm1/Birc2/Gabarap/Cdk9/Dnajb2/Pttg1p/Chfr/Fbox33/Pten/Mycbp2/Pel1                                                                                       | 41 |
| Hspa1b/Nk4a1/Gapdh/Hsp41/Kf4/Syk/Gpx1/Mul1/Rps3/Pfaur/Pcid2/Lapm5/Pmaip1/Casp2/Pcd2/Malt1/Myc/Sirt1/Ar6p1/Arnt2/Fis1/Siah2/Cank2a1/Drgk1/Akt2/Mical1/Herpud1/Anp32b/Elf2ak3/Bmi1/Fnip1/Stat1/Birc6/ | 19 |
| Chhd2/Atf2/Natc3/Lmd1/Cited2/Egr1/Map2k1/Myc/Bcl2/Armi/Cr1/Sirt1/Hif1an/Nfe2l2/Ep300/Pkcb/Birc2/Eno1/Cank2d/Ogt/Mecp2/Pgk1/Hga1/Pten/Pmi/Usp19                                                      | 22 |
| Dnaja1/Foxp1/Akap13/Pges3/Rnf18/Nrc21/Fkbp4/Parp1/Sirt1/Daxx/Ep300/Drgk1/Lbh/Cnot1/Arf1/Per1/Ncoa2/Cnot2/Prcc/Prcb1/Safb/Cair                                                                       | 26 |
| Nk4a1/Fos/Mef2c/Cf2/Mbml1/Foxp1/Naca/Mef2d/Gpx1/Atf3/Tsc22d3/Natc3/Cited2/Egr1/Gpccp1/Myc/Bcl2/Ep300/Cnt2/Snr1/Ppp3ca/Pax5/Ctnnb1/Rps6kb1/Usp19                                                     | 25 |
| Sirt1/Ptpr/Pkcb/Lmbd1/Sik2/Inpp5k/Ogt/Ptpr2/Pk3r1/Cnd3/Rps6kb1/Nucks1/Soccs3/Osbp8/Ptpr1                                                                                                            | 15 |
| Hspa90ab1/Hsp90aa1/Nkbia/Hsp41/Syk/Atf2/Mtbp31/Nup50/Ipo7/Nup88/Kpnb1/Ppp3ca/Pex7/Pttg1p/Ing1/Pk3r1/Rbnm2/Ppp2ca/Ranbp2/Trpo1/Phip/Pmi/Zc3h12a/Apoe/Hspa4/Cse11                                     | 27 |
| Jun/Zfp36/Chd1/Sp100/Rel1/Ep300/Cnt2/Inpp5k/Snr1/Sp1/Ttim11/Nucks1                                                                                                                                  | 12 |
| Dnajb1/Kf2/Jun/Ppp1r15a/Atf3/Cited2/Egr1/Arnt/Hif1an/Nfe2l2/Elf2ak3/Atf8                                                                                                                            | 12 |
| Zfp36/Lmd1/Map2k1/Ddx8/Mecp2/Nkbl1/Ppp3ca/Elf4e2/Tnrc6c/Zc3h12a/Pum2/Tnrc6b                                                                                                                         | 14 |
| Hsp90aa1/Gapdh/Hsp41/Syk/G3bp1/Dhx36/Setd2/Ztb20/Zc3hav1/Hnar1/Stat1/Myd88/Riok3/Chuk                                                                                                               | 12 |
| Hspa1a/Hspa1b/Hsp90ab1/Rps7/Smad7/Lapm5/Arh1/Cenk1d/Xpo1/Cank2a1/Gabarap/Drgk1/Smarrc1/Ogt/Usf7/Herpud1/Zfand2a/Dnajb2/Chfr/Pten/Arh2/Pmi                                                           | 35 |
| Jun/Dnajb1/Ppp1r15a/Smad7/Dusp1/Hspb1/Ppb1/Sbg4d45b/Hpk3/Sirt1/Tmed2/Arnt2/Ptpr/Cbbl/SH2b3/Npm1/Mical1/Inpp5k/Ogt/Ptpr2/Ube2b/Gadd45g/Sik38/Rabgef1/Pten/Ppp2ca/Irak3/Zc3h12a/Soccs3/Ptpr/Dnaj      | 22 |
| Dnaja1/Wnk1/Rp37/Zfp36/Smad7/Dusp1/Rs2/Hspb1/Pxd3/Gadd45b/Hpk3/Sirt1/Ptpr/Cbbl/SH2b3/Npm1/Pk3ip1/Inpp5k/Ptpr2/Gadd45g/Sik38/Pten/Ppp2ca/Irak3/Pmi/Ptpr/Dnajc3/Apoe/Ptpr1                            | 29 |
| Dnaja1/Hsp41/Kf4/Atf3/Dusp1/Dusp5/Elf3a/Hpk3/Itch/Foxo1/Ptpr1/Sh2b3/Inpp5k/Ptpr2/Sik38/Per1/Zmynd11/Dusp16/Pten/Fcn/Plcn/Ptpr/Apoe/Ptpr1                                                            | 24 |
| Zfp36/Myc1c/Pcid2/Snf7/Ret2/Rae1/Xpo1/Npm1/Nup88/Nup210/lws1/Casc3/Magoh/Poldip3/Sid2/Eny2/Ranbp2/Akap8/Pabpn1/Chtop/Nxf1                                                                           | 21 |
| Jun/Fos/Atf3/Hga1/Phf1/Kf10/Hnmp1/Bcl2/Sirt1/Foxo1/Pik3c3/Nfe2l2/Gabarap/Sik2/Pkag1/Snr1/Pk3r4/Elf2ak3/Tnrc6a/Fnip1/Hgd1a/Wpi2/Map1c3a/Fcn/Zc3h12a/Ptrpr                                            | 27 |
| Hsp90ab1/Hsp90aa1/Gapdh/Hsp41/Hsp41/Rps7/Smad7/Mul1/Pges3/Tb1x/Usp36/Ep300/Npm1/Ube2b/Usf7/Naat5/Pk3r1/Pten/Golga7/Pmi/Rab3gap1/Usp19/Cair/Hytk                                                     | 24 |
| Hsp90aa1/Hsp41/Foxp1/Syk/Mul1/Rps19/Clec2d/Rnf125/Matrx3/Nmi/Itch/Cd84/Arnt2/Fbox38/Tspan32/H2-M3/Zc3hav1/Ptpr2/Cd55/Ptpr1/Ankrd17/C1qbp/Stat1/Mdnl/Yhdh3/Usp15/Ttim12a/Irak3/Pmi/Riok3/Zc3h12a/Pl  | 14 |
| Kdm5a/K3/Crem/Egr1/Sirt1/Cank1d/Ogt/Per1/Ncoa2/Bhhd40/Mycbp2/Relb/Pmi/Kmt2a                                                                                                                         | 34 |
| Smad7/Gpx1/Mul1/Rps19/Rc3h2/Clec2d/Inpp5d/Rnf125/Nmi/Cr1/Itch/Cd84/Arnt2/Ptpr2/Cd55/C1qbp/Yhdh3/It4ra/Usp15/Rabgef1/Irak3/Riok3/Zc3h12a/Ptrpr/Bcl6                                                  | 25 |
| Hspa2/Cf2/Nat1/Mat1/Capp/Sptbn1/Tmod3/Ptbp1/Alg12/Actin1/Myc/Dedd2/Ets1/Rb1cc1/Smarrc1/Snnp/Fis1/Gabarap/Drgk1/Smarrc1/Mical1/Cebpg/Ptpr/Plek/Arf1a/Pk3r1/Uvrag/Filii/Wpi2/Map1c3a/Rnk3/Vk1/Scaf    | 38 |
| Cdc47/Ppp1r15b/Elm1/Tmed2/Nfe2l2/Ptpr2/Elf2ak3/Tmco1/Atf6/Bcl2/11/Ptpr1                                                                                                                             | 11 |
| Nap111/Ubt1/Smarc5/Sart3/Ref1/Sirt1/Daxx/Npm1/Cabin1/Anp32b/Atrv/Ub1/Smarc2/Paf1/Nap114/Nasp/Kat5a                                                                                                  | 17 |
| Hsp90ab1/Hsp90aa1/Hsp41/Syk/Akap13/Trf4/Rps3/Zfp91/Zeb2/Dgkz/Malt1/Egr1/Map2k1/Cab39/Sirt1/Arnt2/Daxx/Kras/Cdc25b/Npm1/Rap1a/Igapp1/Pk3r4/Stat1/Map4k2/Zfp622/Cd86/Hgd1a/Cnd3/Cd19/Ccr7/Sk11        | 40 |
| Syk/Satb1/Rc3h2/H2-Ab1/Rps3/Lapm5/Arh1/Dhps/Rasa3/Itch/Cbbl/Tnfrsf13c/Fkbp1a/Btla/Cd55/Cd86/Cnd3/Dock8/Myd88/Hst/Ctnnb1/Ccr7/Dock2/Cd81/Msn/Ptpr                                                    | 26 |
| Nk4a1/Fos/Mef2c/Cf2/Cacopy/Mbml1/Foxp1/Naca/Mef2d/Gpx1/Akap13/Atf3/Tsc22d3/Natc3/S1/pr1/Hrd1/Kdm6b/Cited2/Egr1/Nrc31/Gpccp1/Myc/Bcl2/Carp1/Sirt1/Arnt2/Ep300/Cnt2/Fkbp1a/Camk2d/Snr1/Ube4           | 43 |
| Foxp1/Smad7/Rc3h2/Malt1/H4a/Nkbid/H2-M3/Gadd45g/Ly9/H4a/Ccr7/Relb/Zc3h12a/Bcl6                                                                                                                      | 14 |
| Hsp90aa1/Atf2/Rnf125/Crebbp/Wdy4/Zc3hav1/Nrk1/Ankrd17/C1qbp/Usp15/Riok3/Chuk/Zc3h12a/Pum2                                                                                                           | 14 |
| Chhd2/Atf2/Cited2/Egr1/Map2k1/Myc/Bcl2/Armi/Hif1an/Nfe2l2/Eno1/Ogt/Pgk1/Hgd1a/Pten/Usp19                                                                                                            | 7  |
| Ppp1r15a/Ppp1r15b/Tmed2/Npm1/Elf2ak3/Pmi/Dnajc3                                                                                                                                                     | 17 |
| Hsp90ab1/Rps7/Zfp36/Azn1/H10ra/Herc1/Dhx36/Srx12/Bcl2/Elf4g2/Hnmpa0/Usp36/Pdx3/Smg1/Cank2a1/Ddrgk1/Ctsa/Smarrc1/Ogt/Usf7/Taf15/Spce/Myd88/Fus/Dbl/Larp1/Secisbp2/Irak3/Mycbp2/Pmi/Usp19/Larp4b      | 32 |
| Zfp36/Lmd1/Map2k1/Ddx8/Mecp2/Nkbl1/Ppp3ca/Elf4e2/Tnrc6c/Zc3h12a/Pum2/Tnrc6b                                                                                                                         | 12 |
| Smad7/Rc3h2/H2-Ab1/Pag1/Lapm5/Tnfap82/Inpp5d/Hspb1/Itch/Cd84/Nkbid/Cblb/SH2b3/Bank1/Tspan32/Ptpr2/Btla/Cd86/H4a/Rabgef1/Cnr2/Cd200/Pel1/Zc3h12a/Apoe/Bcl6                                           | 16 |
| Rps5/Rps3/Rps27/Rps2/Rps19/Rp24/Rps28/Atf1/Rs1/Dhx30/Mps7/C1qbp                                                                                                                                     | 23 |
| Kf2/Pkcb/Hps24/Zfp36/Rps19/Kmt2a/Rps17/Inpp5d/Tmod3/Tcaa1/Cited2/Ets1/Ldb1/Sh2b3/Pipr2/Cebpg/Stat1/Ptbp3/Hspa9b/Sp1/Bcl2/11/Bcl6/Dnase2a/Pmtt1                                                      | 24 |
| Nkbia/Birc3/Zfp36/Syk/Rps3/Lapm5/Lims1/Adam10/Sirt1/Zfp362/Trf1/Nfe2l2/Ikbb/Birc2/Tnfrsf13c/Inpp5k/Ptpr2/Nkbl1/Stat1/Rps6kb1/Zfand6/Chuk/Zc3h12a/Ptpr8                                              | 20 |
| Kf2/Zfp36/Rps19/Kmt2a/Inpp5d/Tmod3/Tcaa1/Cited2/Ets1/Ldb1/Sh2b3/Pipr2/Cebpg/Stat1/Ptbp3/Hspa9b/Sp1/Bcl6/Dnase2a/Pmtt1                                                                               | 24 |
| Nk4a1/Fos/Mef2c/Cf2/Mbml1/Foxp1/Naca/Smad7/Mef2d/Gpx1/Kf4/Atf3/Tsc22d3/Natc3/S1/pr1/Cited2/Egr1/Gpccp1/Myc/Bcl2/Sirt1/Ep300/Cnt2/Fkbp1a/Chkb/Snr1/Ube4b/Ppp3ca/Pax5/Mts1/Ctnnb1/Rps6kb1/Chd2/Cf     | 35 |
| Macf1/Vps37b/Naca/Myc1c/Zdhxc3/Exoc4/Zdhxc18/Ar6p1/Fis1/Akt2/Inpp5k/Ogt/Srpr/Rabgef1/Tram1/Golga7/Sec63/Gd1                                                                                         | 18 |
| Ppp1r15a/Wnk1/Smad7/Atf2/Cik1/Map2k1/Cab39/Bcl2/Hpk3/Pkcb/Cank2a1/Camk2d/Inpp5k/Ogt/Rock1/Sbk1/Wk1/Phip                                                                                             | 21 |
| Ubb/Rps7/Atf3/Rps3/Pmaip1/Casp2/Myc/Dedd2/Sirt1/Daxx/Fis1/Ptpr2/Elf2ak3/Trp53np1/Pten/Faf1/Bclaf1/Fcn/Pmi/Bcl2/11/Ptrpr                                                                             | 18 |
| Zfp36/Lmd1/Map2k1/Ddx8/Mecp2/Nkbl1/Ppp3ca/Elf4e2/Tnrc6c/Zc3h12a/Pum2/Tnrc6b                                                                                                                         | 12 |
| Gapdh/Atf3/Rs2/Pges3/B3gn7/Nrc31/Sirt1/Chst12/Foxo1/Ep300/Gr1/Akt2/Inpp5k/Ogt/Ptpr2/Usf7/Nrk1/Plek/B3gn2/Sup20/Pgk1/Cf2/Sk111/Ranbp2                                                                | 24 |
| Kmt2c/Sirt1/Mt2/Ogt/Snr1/Mecp2/Hes1/Atrx/Pax5/Rf1/Ctnnb1/Paf1/Kmt2a/Ned1/Chtop                                                                                                                      | 15 |
| Nk4a1/Fos/Mef2c/Cf2/Mbml1/Foxp1/Naca/Mef2d/Gpx1/Atf3/Tsc22d3/Natc3/Cited2/Egr1/Gpccp1/Myc/Bcl2/Ep300/Cnt2/Snr1/Ppp3ca/Pax5/Ctnnb1/Rps6kb1/Usp19                                                     | 25 |
| Nk4a1/Fos/Mef2c/Cf2/Cacopy/Mbml1/Foxp1/Naca/Smad7/Mef2d/Gpx1/Akap13/Atf3/Tsc22d3/Natc3/S1/pr1/Hrd1/Kdm6b/Cited2/Egr1/Gpccp1/Myc/Bcl2/Sirt1/Arnt2/Ep300/Cnt2/Fkbp1a/Camk2d/Snr1/Ube4b/Ppp3           | 41 |
| Macf1/Nat/Sptbn1/Zdhxc3/Tmed2/Zfyw27/Ikbb/Vamp3/Golga4/Bsg/Cank2a1/Tspan32/Rap1a/Camk2d/Akt2/Inpp5k/Pgmc1/Rock1/Wamp/Rer1/Rhog/Atp2c1/Pk3r1/Cf2c/Ppp2r6a/Golga7/Vts1/Cd81/Sys1/Myadm/Rapp           | 31 |
| Jun/Atf3/Atf2/Pmaip1/Kf10/Hnmp1/Bcl2/Sirt1/Foxo1/Pik3c3/Nfe2l2/Gabarap/Sik2/Pkag1/Snr1/Pk3r4/Elf2ak3/Tnrc6a/Fnip1/Hgd1a/Wpi2/Map1c3a/Fcn/Zc3h12a                                                    | 24 |
| Dnajb1/Hspa90/Hspa1/Hspa1a/Hspa1b/Hsph1/Pges3/Srt13/Hspa9b/Hspa14                                                                                                                                   | 10 |
| Dnajb1/Hspa90/Hspa1/Hspa1a/Hspa1b/Hsph1/Pges3/Srt13/Hspa9b/Hspa14                                                                                                                                   | 10 |
| Jun/Dnajb1/Fos/Chhd2/Hsp41/Rhob/Foxp1/Lrnc8/Gpx1/Atf2/Rps3/Hpk1/Pkcb/Kdm6b/Alg2/Bcl2/Arnt/Parp1/Sirt1/Sik12a/Foxo1/Nfe2l2/Zfp622/Rcnd1/Trp53np1/Oser1/Ctnnb1/Pcap/Seqx/Relb/Pmi/Chuk/Zc3h12a        | 33 |
| Hsp90ab1/Hsp90aa1/Vps37b/Tm2b/Rab43/Pcbp1/Tmim59/Vapa/Bcl2/Ddx4/Arb1/bst1/Bsg/Zc3hav1/Inpp5k/Alg162/Fam111a/Uvrag/Larp1/Bcl2/Tim12a/Pmi/Tim11/Zc3h12a/Nucks1/Apoe/Srk2                              | 28 |
| Itfgr1/Dhx36/Hnmp1/Nfe2l2/Ef3a/Npm1/Elf2ak3/C1qbp/Poldip3/Yhdh3/Larp1/Rps6kb1/Usf16/Secisbp2/Sp1/Dnajc3/Apoe/Larp4/Larp4b/Vim/Ef2a3                                                                 | 21 |
| Jun/Hsp90ab1/Kf4/Hga4/Pfaur/Pxip1/Sp100/H4/Myc/Hnmp1/Hpk3/Ref1/Parp1/Sirt1/Arnt2/Ef3a/Kr1/Ep300/Snarp/Cblb/Dnrf1/Eno1/Srv/Cdk9/Mecp2/Ppp3ca/Rock1/Ep4b1/Elf2ak3/Dnajb2/Ctnnb1/Ppp2ca/Btlf1/Nsd1     | 34 |
| Hsp90ab1/Dnajb1/Syk/Akap13/Dusp1/Rps3/Zeb2/Map2k1/Cab39/Hpk3/Sirt1/Ptpr/Kras/SH2b3/Igapp1/Inpp5k/Pkag1/Cnppd1/Sik38/Map4k2/Hgd1a/Cnd3/Uvrag/Srv/Pten/Ccr7/Sk11/Ppp2ca/Irak3/Cnt1/Ptpr/Apoe/Pl       | 37 |
| Zfp36/Rc3h2/Dhx36/Zfp362/Ce1f1/Rock1/Tnrc6a/Cnot1/Pan3/Cnot2/Yhdh3/Tnrc6c/Zc3h12a/Zc3h12a/Tnrc6b                                                                                                    | 15 |
| Zfp36/Rc3h2/Dhx36/Zfp362/Ce1f1/Zc3hav1/Rock1/Tnrc6a/Cnot1/Pan3/Cnot2/Yhdh3/Tnrc6c/Zc3h12a/Zc3h12a/Tnrc6b                                                                                            | 15 |
| Smad7/Rc3h2/H2-Ab1/Pag1/Lapm5/Tnfap82/Inpp5d/Hspb1/Itch/Cd84/Nkbid/Cblb/Bank1/Tspan32/Ptpr2/Btla/Cd86/H4a/Rabgef1/Cnr2/Cd200/Pel1/Zc3h12a/Bcl6                                                      | 24 |
| Cytl1/P2ry10/Donmd4a/Akap13/Cdc42se2/Dgkz/Rasa3/Map2k1/Dynt1c/Kras/Gabarap/Camk2d/Ogt/Arfge1/Rasa2/Rabgef1/Dock2/Ralgs2/Dnm2/Gpr65/Fcn/Apoe/Bcl6/Iqsec1                                             | 28 |
| Mbml1/Sf3b1/Isv1/Rbm5/Scaf11/Ce1f1/Ce1f2/Luc72/Srf10/Setx/Srpk2                                                                                                                                     | 11 |
| Hsp90aa1/Hsp41/Hsp41/Smad7/Syk/Hga4/H2-Ab1/Rps3/Pfaur/Sar1/Malt1/Cited2/Dhps/Rasa3/Ets1/Nkbid/H2-Eb2/Tnfrsf13c/Jak1/Cd55/Nat5/Cd86/Dock8/Hst61/H4a/Ccr7/Rhoh/Cd81/Ptpr/Bcl6                         | 30 |
| Pdx4b/Wnk1/Rc3h2/Rps3/Lapm5/Dgkz/Malt1/Elf1/Nkbid/Ptpr/Cblb/Elf2b2/Dnm1b/Ptpr2/Ccr7/Sk11/Cd81/Zc3h12a/Ptpr                                                                                          | 19 |
| Zfp36/Myc1c/Pcid2/Snf7/Dhx36/Setd2/Rae1/Xpo1/Npm1/Nup88/Nup210/lws1/Casc3/Magoh/Poldip3/Sid2/Eny2/Ranbp2/Akap8/Pabpn1/Chtop/Nxf1                                                                    | 22 |
| Vps37b/Tm25/Zfp36/Top2b/Crebbp/Sp100/Tmem58/Vapa/Bcl2/Ref1/Dynt1c/Bsg/Zc3hav1/Inpp5k/Fam111a/Stat1/Larp1/Bst1/Trm12a/Pmi/Tim111/Srk2                                                                | 22 |
| Nkbia/Birc3/Zfp36/Syk/Rps3/Lapm5/Lims1/Sirt1/Zfp362/Trf1/Nfe2l2/Ikbb/Birc2/Tnfrsf13c/Inpp5k/Ptpr2/Nkbl1/Stat1/Zfand6/Chuk/Zc3h12a/Ptpr8                                                             | 22 |
| Hsp90ab1/Rps7/Zfp36/H10ra/Herc1/Dhx36/Bcl2/Elf4g2/Hnmpa0/Usp36/Smg1/Cank2a1/Ddrgk1/Ctsa/Smarrc1/Ogt/Usf7/Taf15/Spce/Myd88/Fus/Dbl/Larp1/Secisbp2/Pmi/Usp19/Larp4b                                   | 27 |
| Serfat1/Pcid2/Nrc31/Setd2/Map2k1/Ldb1/Wd43/Zmynd11/Rtfl1/Ctnnb1/Paf1/Sufl16/Zmiz2                                                                                                                   | 13 |
| Hsp90ab1/Ppp1r15a/Macf1/Cf2/Seh2/Capp/Myc1c/Sptbn1/Tmod3/Ano6/Hrd1/Rnt6/Anxa4/Bcl11a/Arpc5/Slc12a6/Itf1/Rb1cc1/Atf5g1/Zfyw27/Dip2b/Fchs2/Golga4/Npm1/Elf2b2/Ogt/Arfge1/Plek/Hax1/Bmi1/Filii/Pten/Dn | 38 |
| Ppp1r15a/H13/Casp2/Naas5/Prmpc/Tmem208/Gm16286/Naas50/Adam10/Crebbp/Cpm1/Dhps/Naas10/Myc/Snr12/Sec1c/Parp1/Pik3c3/Ep300/Snarp1/Dnajb1/Tspan32/Eno1/Ogt/Naat5/Iscal1/Pgk1/Fam111a/Sde2/Fcrr1/C       | 32 |
| Macf1/Nat/Sptbn1/Zdhxc3/Adam10/Map2k1/Tmod3/Zfyw27/Ikbb/Vamp3/Golga4/Bsg/Cenk2a1/Tspan32/Rap1a/Camk2d/Akt2/Inpp5k/Pgmc1/Rock1/Ep4b1/Wamp2/Rer1/Rhog/Atp2c1/Pk3r1/Cf2c/Ppp2r6a/Golga7/Vts1/H1b/C     | 35 |
| Hspa90/Hsp90aa1/Nkbia/Syk/Atf2/Mtbp31/Nup50/Ipo7/Nup88/Kpnb1/Ppp3ca/Pttg1p/Ing1/Pk3r1/Rbnm2/Ppp2ca/Ranbp2/Trpo1/Phip/Pmi/Zc3h12a/Cse11                                                              | 22 |
| Atf2/Morf42/H4/Sirt1/Phf20/Ep300/Ogt/Hes1/Per1/Brd8/Epc1/Ep400/Kmt2a                                                                                                                                | 13 |
| Hsp90ab1/Hsp90aa1/Kf4/Dusp1/Pges3/Rps3/Srchd1/Dhx36/Setd2/Myc/Sub1/Parp1/Sirt1/Arnt2/Smg5/Smg1/Npm1/Camk2d/Pona/Ube2b/Usf7/Cdk9/Mecp2/Cebpg/Atrv/Fns2/Ctnnb1/Fcn/Kmt2a/Nuck                         | 36 |
| Hspa1a/Hsp90ab1/Hsp90aa1/Pges3/Dhx36/Sp100/Myc/Parp1/Doire1c/Smg5/Smg1/Pona/Nhp2/Atrv/Tnks2/Ctnnb1/Pmi/Gn3                                                                                          | 11 |
| Kmt2e/Sirt1/Mt2/Ogt/Snr1/Mecp2/Rtfl1/Ctnnb1/Paf1/Kmt2a/Chtop                                                                                                                                        | 18 |
| Hspa90/Hsp41/Mef2c/Smad7/Artd5a/Rc3h2/H2-Ab1/Malt1/Cr1/Nkbid/H2-Q7/Fbox38/Tnfrsf13c/Dnm1b/H2-M3/Cd55/H2-Q6/H4a/Ccr7/H2-Q4/Cd81/Zc3h12a/Ptrpr/H2-T23/Bcl6                                            | 25 |
| Hsp90ab1/Hsp90aa1/Hsp41/Syk/Akap13/Trf4/Rps3/Zfp91/Zeb2/Malt1/Egr1/Map2k1/Cab39/Sirt1/Arnt2/Daxx/Kras/Cdc25b/Npm1/Rap1a/Igapp1/Stat1/Map4k2/Cd86/Hgd1a/Cnd3/Cd19/Ccr7/Sk111/Ppp2ca/Ptpr/Nedd9/Oab   | 34 |
| Atad1/Smad7/Dynt1c/Pcid2/Zdhxc3/Adam10/Fkbp4/Setd2/Map2k1/Rae1/Xpo1/Snarp1/Npm1/Lar1a/Nup88/Rs1/lws1/Pcm1/Rcc2/Vamp2/Poldip3/Eny2/Akap8/Akap8/Pabpn1/Chtop/Nxf1/Iqsec1                              | 28 |
| Hspa90/Jun/Hsp90ab1/Gapdh/Hsp41/Hsp41/Rps37b/Tm25/Gpx1/Chd1/Tmim59/Vapa/Ar6b/Dynt1c/Itf1/Ep300/Bsg/Inpp5k/Snr1/Myd88/Uvrag/Tm12a/Sp1/Pmi/Tim11/Zc3h12a/Nucks1/Bcl2/11/Apoe                          | 28 |
| Pcid2/Setd2/Rae1/Xpo1/Npm                                                                                                                                                                           |    |



|                                                                                                                                                                                                            |    |
|------------------------------------------------------------------------------------------------------------------------------------------------------------------------------------------------------------|----|
| Zp91/Rn4/Itch/Traf1/Birc2/Ube2b/Ube2g1/Trim12a/Arh2/Pell1/Trip12                                                                                                                                           | 11 |
| Hspd1/Foxp1/Zfp36/Syk/Artd5a/Ifng1/Hspb1/Cd2/Sirt1/Cd84/Arb2/Pprj/Zbtb20/Tspo/Pik3r1/Myd88/Ccr7/Irak3/Zc3h12a/Ptprc                                                                                        | 20 |
| Klf2/Klf4/Atf2/Tcf4/Pde3b/Krt1/Sh2b3/Mecp2/Rock1/Sars/Pgk1/Stat1/Cttnb1/Ficn/Pml                                                                                                                           | 15 |
| Hspa8/Hspd1/MeF2c/Smad7/Artd5a/Bach2/Rc3h2/H2-Ab1/Hnp5d/Tcig1/Malt1/Hf4/Or11/Nkbid/H2-Q7/Fbxo38/H2-Eb2/Tnfrsf13c/Dennd1b/H2-M3/Gadd45g/Cd55/C1qbp/H2-O6/Ly9/Myd88/Cd19/Il4ra/Ccr7/H2-Q4/Cd81b/             | 38 |
| Dnaj1a/Hspbl/Dusp1/Traf4/Rel1/Gadd45b/Map2k1/Hpk3/Itch/Foxo1/Rb1/cc1/Traf1/Gadd45g/Map4k2/Zfp622/Per1/Zmynd11/Myd88/Zc3h12a/Lmnb1/Pmt1                                                                     | 21 |
| Syk/Rasa3/Itch/Ccib/Blla/Cd55/Dock2/Cd81/Ptprc                                                                                                                                                             | 9  |
| Hspd1/Syk/Mul1/Rps3/Laptn5/Pmaip1/Casp2/Pdcd2/Malt1/Myc/Sirt1/Fis1/Anp32b/Elf2ak3/Stat1/Ppp2ca/Pml/Cyfp2/Bcl2l11                                                                                           | 19 |
| Jun/Kf4/Plaur/Sp100/Irf4/Myc/Hpk3/Rsf1/Parp1/Sirt1/Ep300/Odrgr1/Sn/Cttnb1/Nsd1/Hspa4                                                                                                                       | 16 |
| Kmt2e/Artd4b/Setd2/Sirt1/Mt2/Kmt2c/Ogt/Snw1/Mecp2/Ehmt1/Iws1/Atrx/Pax5/Rhf1/Cttnb1/Kmt2a/Nsd1                                                                                                              | 17 |
| Hspa8/Jun/Gapdh/Hspd1/Gpx1/Chd1/Napa/Ep300/Inpp5k/Snw1/Myd88/Sp1/Zc3h12a/Nucks1/Apoe                                                                                                                       | 15 |
| N3c1/Sirt1/Foxo1/Ep300/Ogt/Ptpr2/Usf7/Supt20/Skt11/Ranbp2                                                                                                                                                  | 10 |
| Nkbia/Mul1/Pmaip1/Dhx36/Npm1/Zc3hav1/Nkbl1/Stat1/Irak3/Pell1/Rlk3                                                                                                                                          | 11 |
| Gapdh/ATF3/N3c1/Sirt1/Foxo1/Ep300/Ogt/Ptpr2/Usf7/Supt20/Pgk1/Sk11/Ranbp2                                                                                                                                   | 13 |
| Ubb/Hsp90ab1/Junb/Artd4b/Hgs4/Plaur/Dazap1/Xist/Pdx3/Cited2/Fkbp4/Setd2/Map2k1/Bcl2/Arnt/Sirt1/Tmed2/Jmyd1c/Arnt2/Birc2/Elf2b2/Nduf6/Fndc3a/Bptf/Atrx/Arid1a/Birc6/Cttnb1/Pten/Akap9/Ppap/Sk11/Sp1/Socs3   | 38 |
| Erf1/Stambp1/Sart3/Rch/Usp36/Znan1/Usf7/Usf4/Dnaj2/Usf15/Eny2/Usf16/Usf24/Zc3h12a/Usf19                                                                                                                    | 15 |
| Jun/Dhx36/Myc/Sub1/Ubtf/Smarca5/Rsf1/Med13/Gt2a2/Gt2h5/Tiam/Bdp1/Bclaf1/Setx                                                                                                                               | 14 |
| Trim25/Zfp36/Crebbp/Sp100/Trim59/Zc3hav1/Inpp5k/Fam111a/Stat1/Bat2/Trim12a/Pml/Trim11/Srpk2                                                                                                                | 14 |
| Macf1/Actg1/Lims1/Lamtor2/Bcl2/Ldb1/Ptprj/Iqgapp1/Rock1/Rcc2/Pik3r1/Pten/Tin1/Iqsec1                                                                                                                       | 14 |
| Hspa1a/Hspa1b/Smad7/Laptn5/Arh1/Cank1d/Gabarap/Ddrgk1/Herpud1/Zhand2a/Dnaj2/Chfr/Pten/Arh2                                                                                                                 | 14 |
| Neat1/Ets1/Daxx/Serbp1/Pml/Srpk2                                                                                                                                                                           | 6  |
| Rrf125/Zc3hav1/Ankrd17/C1qbp/Usf15/Pum2                                                                                                                                                                    | 6  |
| Zfp36/Dhx36/Zfp362/Cnot1/Tnrc6c/Tnrc6b                                                                                                                                                                     | 6  |
| Dnaj1a/Hspbl/Dusp1/Traf4/Rel1/Gadd45b/Map2k1/Hpk3/Itch/Foxo1/Rb1/cc1/Traf1/Gadd45g/Map4k2/Zfp622/Per1/Zmynd11/Myd88/Zc3h12a/Lmnb1/Pmt1                                                                     | 21 |
| Hsp90ab1/Ppap1/Myo1c/Pmaip1/Fis1/Ak2/Mecp2/Anp32b/Pcm1/Vamp2/Trim30a/Pk3r1/Sfn/Sk11/Rbn22/Cd81/Zc3h12a/Msn/Creb1/Numa1                                                                                     | 20 |
| Hspd1/Foxp1/Zfp36/Syk/Artd5a/Ifng1/Hspb1/Cd2/Sirt1/Cd84/Arb2/Pprj/Zbtb20/Tspo/Pik3r1/Myd88/Ccr7/Irak3/Zc3h12a/Ptprc                                                                                        | 20 |
| Chchd2/Atf2/Nfatc2/Limd1/Cited2/Egr1/Map2k1/Myc/Bcl2/Arnt/Cr1/Sirt1/Hif1an/Foxo1/Nfe2l2/Ep300/Pkcb/Birc2/Eno1/Camk2d/Ogt/Mecp2/Pgk1/Hgd1a/Pten/Pml/Usf19                                                   | 27 |
| MeF2c/Syk/Irs2/Rps3/Dhps/Rasa3/Stgga1/Bcl2/Tnfrsf13c/Cd55/Cd86/Myd88/Il6st/Ccr7/Cd81/Pell1/Ptprc/Bcl6                                                                                                      | 18 |
| Jun/Fos/Atf2/Pmaip1/Casp2/Egr1/N3c1/Parp1/Daxx/Atp5g1/Itk/Ikbb/Fis1/Cttnb1/Bcl2l11/Apoe/Srpk2                                                                                                              | 16 |
| MeF2c/Syk/Irs2/Rps3/Dhps/Rasa3/Bcl2/Tnfrsf13c/Cd55/Cd86/Myd88/Il6st/Ccr7/Cd81/Pell1/Ptprc/Bcl6                                                                                                             | 17 |
| Rhob/Crebbp/Dhx36/Egr1/Rf4/Parp1/Sirt1/Ep300/Npm1/Ak2/Pcna/Trp53inp1/Pik3r1/Sde2/GH2h5/Sk11/Nucks1/Nipbl/Cnd2                                                                                              | 19 |
| Mul1/Egr1/Arnt/Usa2/Cttnb1/Sae1/Gn3                                                                                                                                                                        | 7  |
| Dynl1c/Kras/Gabarap/Camk2d/Ogt/Deck2/Dnm2                                                                                                                                                                  | 7  |
| Dhx36/Nr3c1/Rf4/Daxx/Zhand2a/Zc3h12a/Sic3ba2                                                                                                                                                               | 7  |
| Foxp1/Rps3/Pkcb/Stap1/Ccr7/Cd81/Ptprc                                                                                                                                                                      | 7  |
| Sertad1/Foxp1/Mul1/Hnf1b/Rnf6/Bcl11a/Bcl2/Sirt1/Ptprj/Dip2b/Eno1/Mecp2/Dnaj2/Mndal/Sk11/Bst2/Smarca2/Ficn/Pml/Rad/Bcl6                                                                                     | 21 |
| Kmt2e/Azin1/Pcd2/Tmod3/Crebbp/Cdc25b/Npm1/Camk2d/Ube2b/Nsf1c/Mecp2/Anp32b/Rcc2/Arnt/Ankrd17/Cnd3/Cxcr5/Paf1/Phip/Rad21/Usp18/Lmnb1/Numa1/Cnd2                                                              | 24 |
| Hspd1/Mul1/Laptn5/Pmaip1/Casp2/Pdcd2/Myc/Anp32b/Elf2ak3/Stat1/Pml/Bcl2l11                                                                                                                                  | 12 |
| Smad7/Rps19/Rc3h2/Clec2d/Cr1/Cd84/Arb2/Siglec/Cd55/Il4ra/Rabge1/Bst2/Irak3/Zc3h12a/Ptprc/Bcl6                                                                                                              | 16 |
| Hspd1/Foxp1/Zfp36/Syk/Artd5a/Ifng1/Hspb1/Cd2/Sirt1/Cd84/Arb2/Pprj/Zbtb20/Tspo/Pik3r1/Myd88/Ccr7/Irak3/Zc3h12a/Ptprc                                                                                        | 20 |
| Jun/Hspd1/Gpx1/Mul1/Atf2/Plaur/Pmaip1/Bcl2/Arb2/Chchd10/Fis1/Ghlim/Hgd1a/Sfn/Bcl2l11                                                                                                                       | 15 |
| Jun/Fos/Nkbia/MeF2c/Foxp1/Zfp36/Gpr171/Clec2d/Inpp5k/Klf10/Myc/Ets1/Ldb1/Ptpr2/Hax1/Stat1/Pik3r1/Hspa9/Cttnb1/Paf1/Tb2/Pmt1                                                                                | 22 |
| Hspa8/Hspd1/Artd5a/H2-Ab1/Malt1/Nkbid/H2-Q7/Fbxo38/Tnfrsf13c/Dennd1b/H2-M3/Cd55/H2-Q6/H2-Q4/Cd81/Ptprc/H2-T23                                                                                              | 18 |
| Dhx36/Hnmp1/Erf6/Npm1/C1qbp/Poldip3/Ythdf3/Larp1/Rps6kb1/Usp16/Secisbp2/Dnaj3/Larp4/Larp4/Vim/Elf2a3x                                                                                                      | 16 |
| Trim25/Trappc9/Atf2/Rps3/Hnf1d/Malt1/Pdx3/Crebbp/Sp100/Cd84/Traf1/Ep300/Pkcb/Ikbb/Kras/Npm1/Ddrgk1/Ppp3ca/Myd88/Cttnb1/Pten/Cd200/Trim12a/Irak3/Chuk                                                       | 25 |
| Klf4/MeF2c/Rhob/Foxp1/Hspb1/Sp100/Sirt1/Ets1/Nfe2l2/Krt1/Bsg/Mecp2/Sp1/Zc3h12a/Prcp/Apoe/P2rx4/Calr/Atp5a1                                                                                                 | 19 |
| Pcd2/Setd2/Rae1/Npm1/Nup88/Iws1/Poldip3/Eno2/Akap8/Pabpn1/Chtop/Nxf1                                                                                                                                       | 12 |
| Kmt2e/Artd4b/Setd2/Sirt1/Ogt/Mecp2/Iws1/Atrx/Rtf1/Kmt2a                                                                                                                                                    | 10 |
| Ppp1r1/Sa/Ppp1r1/Sa/Cited2/Elf2ak3/Dnaj3                                                                                                                                                                   | 5  |
| Dnaj1b/Jun/Ppp1r1/Sa/Cited2/Hif1an                                                                                                                                                                         | 5  |
| Nr4a1/Klf4/MeF2c/Rhob/Foxp1/Gpx1/Hspbl/Sp100/Sirt1/Ets1/Nfe2l2/Krt1/Bsg/Mecp2/Pten/Sp1/Zc3h12a/Prcp/Apoe/P2rx4/Calr/Atp5a1                                                                                 | 22 |
| Macf1/MeF2c/Naca/Smad7/Mul1/Bcl11a/N3c1/Bcl2/Sirt1/Ce1f1/Atf1/Atp5g1/Zfyve27/Golga4/Elf2b2/Mecp2/Rps6kb1/Dbnl/Apoe/Chd7/Nipbl/Gd1                                                                          | 22 |
| Zfp36/Tnrc6a/Cnot1/Par3/Cnot2/Tnrc6c/Tnrc6b                                                                                                                                                                | 7  |
| Rps21/Fct1/Bms1/Npm1/Abt1/Rs1/Nhp2                                                                                                                                                                         | 7  |
| Mtnl1/Sy1/Ce1f1/Ce1f2/Luc72/Srfl0/Setx                                                                                                                                                                     | 7  |
| Atp2b1/Myo1c/Sirt1/Ptprj/Pkcb/Lmnb1/Inpp5k/Ptpr2/Rps6kb1/Nucks1/Socs3/Osbp8                                                                                                                                | 12 |
| Hspd1/Foxp1/Zfp36/Syk/Artd5a/Ifng1/Hspb1/Cd2/Sirt1/Cd84/Arb2/Pprj/Zbtb20/Tspo/Pik3r1/Myd88/Ccr7/Irak3/Zc3h12a/Ptprc                                                                                        | 20 |
| Pde4b/Nkbia/MeF2c/Foxp1/Zfp36/Rpl13a/Artd5a/Malt1/Pdx3/Sbno2/Cd84/Hnmpa/Ogt/Cd55/Stap1/Nkfb1/Hnar1/Cd86/Stat1/Myd88/Ccr7/Cnr2/Trim12a/Paf1/Irak3/Pabpn1/Pel1/Chuk/Zc3h12a/Ptpr8/Ly86/Vim                   | 32 |
| Hspa8/MeF2c/Cf2/Actg1/Srh2/Capg/Akap13/Myo1c/Rps3/Sptbn1/S1pr1/Tmod3/Fkbp4/Arpc5/Fchd2/Inpp5k/Mecp2/Argef1/Plek/Hax1/Bln1/Pik1/Mtss1/Fil/Akap9/Gpr65/Emi4/Dbnl/Cyfp2/Myadm/Apoe/Numa1                      | 32 |
| MeF2c/Cf2/Capg/Actg1/Foxp1/Naca/Gpx1/Akap13/Nfat3/Plekho1/Tmod3/Kdm6b/Nr3c1/Bcl2/Carp1/Sirt1/Arb2/Daxx/Kras/Camk2d/Ppp3ca/Artd1a/Epc1/Il4ra/Fil/Spag9/Cd81/Chuk                                            | 28 |
| Hspa1a/Rps3/Pds5a/Merf2/Bcl11/Snchd1/Neil1/Pcd4/Setd2/Emys/Parp1/Sirt1/Tdp2/Dlce1/Smg1/Topbp1/Npm1/Pcna/Ube2b/Usf7/Cdk3/Cebpg/Atrx/Namc4a/Rfc1/Fam111a/Uvrag/GH2h5/Tonf/Fus/Setx/Trip12/Pm                 | 38 |
| Macf1/MeF2c/Foxp1/Naca/Smad7/Mul1/Hnf1b/Rnf6/Bcl2/Bcl11a/N3c1/Bcl2/Sirt1/Daxx/Ce1f1/Atf1/Atp5g1/Zfyve27/Dip2b/Golga4/Elf2b2/Mecp2/Trks2/Pten/Rps6kb1/Dnm2/Plac8/Dbnl/Bcl2l11/Apoe/Chd7/Nipbl/Gd1           | 33 |
| Hspa8/Atf2/Rab43/Laptn5/Tppl1/Tcig1/Atg12/Mtbp1/Ar8b/Rb1/cc1/Pik3c3/Snapi/Gabarap/Nsf11c/Trp53inp1/Wip2/Map1lc3a/Hexa/Rab3gapp1                                                                            | 19 |
| Nr4a1/Pde4b/Klf4/MeF2c/Foxp1/Smad7/Atp2b1/Nr3c1/Map2k1/Parp1/Foxo1/Nfatc1/Eno1/Camk2d/Sn/Cdk9/Ppp3ca/Cdk9/Ppp3ca/Roc1/Bln1/Akap9/Zc3h12a/P2rx4                                                             | 24 |
| Macf1/MeF2c/Naca/Smad7/Mul1/Adam10/Bcl11a/N3c1/Bcl2/Sirt1/Elf1qg2/Ce1f1/Atf1/Atp5g1/Zfyve27/Golga4/Cank2a1/Elf2b2/Mecp2/Deaf2/Sfn/Rps6kb1/Cd81/Dbnl/Apoe/Chd7/Nipbl/Gd1                                    | 28 |
| Hsp90ab1/Klf4/Plaur/Hf4/Myc/Hnmp1/Hpk3/Parp1/Elf3a/Krt11/Ep300/Odrgr1/Eno1/Cdk9/Epb41/Elf2ak3/Cttnb1/Ppp2ca/Apoe/Hspa4                                                                                     | 20 |
| Wrk1/Klf4/Macf1/Dusp1/Dusp5/Kdm6b/Exoc4/Setd2/Ldb1/Lmnb1/Supt20/Artd4a/Rtf1/Cttnb1/Tnrc6c/Paf1/Kdm6a/Nsd1/Myadm                                                                                            | 19 |
| Vps37b/Trim25/Vapa/Arf8b/Itf1/Trim12a/Pml/Trim11                                                                                                                                                           | 8  |
| Vps37b/Trim25/Vapa/Arf8b/Itf1/Trim12a/Pml/Trim11                                                                                                                                                           | 8  |
| Vps37b/Trim25/Vapa/Arf8b/Itf1/Trim12a/Pml/Trim11                                                                                                                                                           | 8  |
| Ubb/Hsp90ab1/Junb/Artd4b/Hgs4/Plaur/Dazap1/Xist/Pdx3/Cited2/Fkbp4/Setd2/Map2k1/Bcl2/Arnt/Sirt1/Tmed2/Jmyd1c/Arnt2/Birc2/Elf2b2/Fndc3a/Bptf/Atrx/Arid1a/Birc6/Cttnb1/Pten/Akap9/Ppap/Sk11/Sp1/Socs3/Bcl2l11 | 37 |
| Gpx1/Pmaip1/Crebbp/Dhx36/Bcl2/Parp1/Sirt1/Ep300/Npm1/Pcna/Ube2b/Ube4b/Trp53inp1/Pik3r1/Sde2/Sk11/Pml                                                                                                       | 17 |
| Pde4b/Nkbia/MeF2c/Foxp1/Zfp36/Rpl13a/Artd5a/Malt1/Pdx3/Sbno2/Cd84/Hnmpa/Ogt/Cd55/Stap1/Nkfb1/Hnar1/Cd86/Stat1/Myd88/Ccr7/Cnr2/Trim12a/Paf1/Irak3/Pabpn1/Pel1/Chuk/Zc3h12a/Ptpr8/Ly86/Vim                   | 33 |
| Jun/Nr4a1/Klf4/Macf1/MeF2c/Rhob/Foxp1/Gpx1/Zeb2/Hspb1/Sp100/Sirt1/Ets1/Nfe2l2/Krt1/Bsg/Mecp2/Rock1/Pten/Sp1/Zc3h12a/Prcp/Apoe/P2rx4/Iqsec1/Calr/Atp5a1                                                     | 27 |
| Klf2/Ppp1r1/Sa/Klf4/Rhob/Atf2/Hspb1/Adam10/Sp100/Sirt1/Ets1/Nfe2l2/Tcf4/Pde3b/Krt1/Pkcb/Sh2b3/Jak1/Mecp2/Rock1/Sars/Pgk1/Stat1/Cttnb1/Sp1/Ficn/Pml/Zc3h12a                                                 | 27 |
| Cdc47/Bcl2/Fis1/Camk2d/Herpud1/Tmco1/Pml                                                                                                                                                                   | 7  |
| Gapdh/ATF3/Ins2/Pmaip1/Nr3c1/Myc/Sirt1/Foxo1/Ep300/Eno1/Ak2/Inpp5k/Ogt/Ptpr2/Usf7/Supt20/Pgk1/Ncoo2/Nisch/Pik3r1/Sk11/Ranbp2                                                                               | 22 |
| Klf4/Kmt2e/Casp2/Dgkz/Crebbp/Bcl2/Nfatc1/Zfp655/Camk2d/Anp32b/Ppp3ca/Ankrd17/Cnd3/Sde2/Pten/Rps6kb1/Pml/Nasp/Gpr132/Cnd2                                                                                   | 20 |
| Jun/Kf4/Macf1/MeF2c/Rhob/Foxp1/Hspb1/Sp100/Sirt1/Ets1/Nfe2l2/Krt1/Bsg/Mecp2/Pten/Sp1/Zc3h12a/Prcp/Apoe/P2rx4/Iqsec1/Calr/Atp5a1                                                                            | 23 |
| Ubb/Rps7/Rps3/Pmaip1/Sirt1/Fis1/Ptpr2/Elf2ak3/Bclaf1/Ficn/Bcl2l11                                                                                                                                          | 11 |
| Jun/Zfp36/Atf3/Atf2/Pmaip1/Klf10/Kym/Hnmp1/Bcl2/Alcy/Sirt1/Foxo1/Pik3c3/Nfe2l2/Gabarap/Skag2/Pkag1/Snw1/Pik4/Elf2ak3/Tnrc6a/Frip1/Hgd1a/Larp1/Wip2/Map1lc3a/Rps6kb1/Ficn/Zc3h12a/Apoe                      | 30 |
| Ubb/Jun/Hsp90ab1/Fos/Gapdh/Hspbl/Hspd1/MeF2c/Gpx1/Atf2/Pmaip1/Casp2/Pdx3/Egr1/Nr3c1/Tmem259/Bcl2/Parp1/Sirt1/Arnt2/Daxx/Atp5g1/Ikbb/Fis1/Kras/Npm1/Ak2/Mecp2/Rock1/Cttnb1/Cd200/Bcl2l11/Apoe/Si            | 34 |
| Jun/Nr4a1/Klf4/Macf1/MeF2c/Rhob/Foxp1/Gpx1/Zeb2/Hspb1/Sp100/Sirt1/Ets1/Nfe2l2/Krt1/Bsg/Mecp2/Rock1/Pten/Sp1/Zc3h12a/Prcp/Apoe/P2rx4/Iqsec1/Calr/Atp5a1                                                     | 27 |
| Hspa8/Gapdh/Naca/Bcl2/Sirt1/Arb2/Nfe2l2/Npm1/Pik3r1/Zc3h12a                                                                                                                                                | 10 |
| Cdc47/Ppp1r1/Sa/Elf2ak3/Tmco1/Bcl2l11                                                                                                                                                                      | 5  |
| Zfp36/Tnrc6a/Cnot1/Tnrc6c/Tnrc6b                                                                                                                                                                           | 5  |
| Smad7/Rc3h2/Clec2d/Inpp5d/Hspb1/Myc/Nkbid/Ptpr2/Pik3r1/Il4ra/Cttnb1/Zc3h12a/Bcl6/Tb2                                                                                                                       | 14 |
| Hsp90ab1/Hsp90aa1/Cytl1/Cenpa/Tcig1/Myo18a/Exoc4/Krt1/Map4/Nsf1c/Argef1/Dock8/Ccr7/Dock2/Sk11/Msn/Numa1                                                                                                    | 17 |
| Jun/Hsp90ab1/Gapdh/Hspbl/Hspd1/MeF2c/Gpx1/Atf2/Pmaip1/Casp2/Pdx3/Egr1/Nr3c1/Bcl2/Parp1/Sirt1/Arnt2/Fis1/Kras/Npm1/Ak2/Mecp2/Rock1/Cttnb1/Bcl2l11/Apoe/Srpk2                                                | 27 |
| Smad7/Rc3h2/Malt1/Nkbid/Il4ra/Ccr7/Zc3h12a/Bcl6                                                                                                                                                            | 8  |
| Hspa1a/Hspa1b/Hsp90ab1/Hsp90aa1/Dnaj1/Pde4b/Ier5/Dhx36/Daxx/Elf2b2/Xytl1/Trp53inp1/Hspa4                                                                                                                   | 13 |
| Birc3/Rc3h2/Rps3/Laptn5/Lims1/Crebbp/Nmi/Ep300/Bcl2/Nfat5/Cd86/Zc3h12a/Calr                                                                                                                                | 11 |
| MeF2c/Irs2/Inpp5b/Bcl2/Siglec/Tnfrsf13c/Blla/Cd81/Pell1/Ptprc/Bcl6                                                                                                                                         | 13 |
| Erf1/Stambp1/Serp6/Sart3/Rch/Usp36/Znan1/Usf7/Usf4/Dnaj2/Usf15/Eny2/Usf16/Usf24/Zc3h12a/Usf19                                                                                                              | 16 |
| Hspa1a/Hspa1b/Smad7/Laptn5/Arh1/Tmem259/Cank1d/Gabarap/Ddrgk1/Herpud1/Zhand2a/Dnaj2/Chfr/Pten/Arh2                                                                                                         | 15 |
| Macf1/Smad7/Nap111/Zeb2/Lims1/Dhx36/Bcl11a/Map2k1/Myc/Bcl2/Itf1/Cux1/Atp5g1/Zfyve27/Golga4/Elf2b2/Snw1/Tspo/Bln1/C1qbp/Il6st/Cttnb1/Sk11/Dnm2/Dbnl/Myadm/Apoe/Ned9/Vim/Calr/Gd1                            | 31 |
| Jun/Nr4a1/Klf4/Macf1/MeF2c/Rhob/Foxp1/Gpx1/Zeb2/Hspb1/Sp100/Sirt1/Ets1/Nfe2l2/Krt1/Bsg/Mecp2/Rock1/Pten/Sp1/Zc3h12a/Prcp/Apoe/P2rx4/Iqsec1/Calr/Atp5a1                                                     | 27 |
| Ins2/Pmaip1/Nr3c1/Myc/Sirt1/Foxo1/Ep300/Zbts20/Akt2/Inpp5k/Ogt/Ptpr2/Usf7/Nfkb1/Plek/Supt20/Ncoo2/Ctkc/Sk11/Ranbp2                                                                                         | 20 |
| Hspa8/Hspd1/Artd5a/H2-Ab1/Malt1/Nkbid/H2-Q7/Fbxo38/Tnfrsf13c/Dennd1b/H2-M3/Cd55/H2-Q6/H2-Q4/Cd81/Ptprc/H2-T23                                                                                              | 17 |
| Trim25/Trappc9/Rps3/Malt1/Pdx3/Cd84/Traf1/Ep300/Pkcb/Ikbb/Kras/Npm1/Ddrgk1/Myd88/Trim12a/Irak3/Chuk                                                                                                        | 17 |
| Jun/Cacyp3/Pds5a/Orc3/Bcar3/Npm1/Pcna/Atrx/Ankrd17/Faf1/Nucks1/Donson/Esco1                                                                                                                                | 14 |
| Hspd1/Dhx36/Nmi/Setd2/Zc3hav1/Stat1/Chuk                                                                                                                                                                   | 7  |
| Hspa1a/Hspa1b/Hsp90ab1/Hsp90aa1/Dnaj1/Pde4b/Ier5/Dhx36/Arb2/Daxx/Elf2b2/Xytl1/Elf2ak3/Trp53inp1/Rnf64/Plac8/Dnaj3/Hspa4                                                                                    | 18 |
| Jun/Hspd1/Jund/Foxp1/Syk/Kmt2e/Ifng1/Myo18a/Adam10/Sbno2/Nmi/Irf4/Cd84/Tspan32/Stap1/Vamp2/Myd88/Il4ra/Rabge1/Cnr2/Cd200/Dock2/Rhob/Rfb                                                                    | 24 |
| Ubb/Syk/Hgs4/Myo1c/Cenpa/Cdc188/Tcig1/CepB3/Exoc4/Map2k1/Cd84/Nudo/Xpo1/Snapi/Npm1/Map4/Nup88/Rrs1/Ube2b/Nsf1c/Kpnb1/Mecp2/Map4k2/Pcm1/Tmed9/Hsp6/Il4ra/Rabge1/Cttnb1/Sk11/Emi4/Rab3gap                    | 33 |
| Foxp1/Smad7/Rc3h2/Malt1/Hf4/Nkbid/H2-M3/Gadd45g/Ly9/Il4ra/Ccr7/Cd81/Relb/Zc3h12a/Bcl6                                                                                                                      | 15 |
| Ppap1/Znfhc3/Atg12/Znfhc18/Pik3c3/Uvgg/Nm2/Dbs/Wip2/Golga7/Dpm1/Apoe/Rab3gapp1                                                                                                                             | 13 |
| Macf1/Nap111/Zeb2/Hnf1b/H2/Dhx36/Bcl11a/Hes8/Map2k1/Myc/Stat1/Cux1/Atp5g1/Zfyve27/Dip2b/Golga4/Dnajb11/Elf2b2/Snw1/Mecp2/Ppp3ca/Pcm1/Tspo/Bln1/Il6st/Bhh4d0/Cttnb1/Pten/Sk11/Trim11/Dbnl/Apoe/Chd7/        | 35 |
| Trim59/Sirt1/Nkbid/Per1/Zmynd11/Stat1/Rhoh/Rlk3/Zc3h12a                                                                                                                                                    | 9  |
| Kmt2e/Tmod3/Crebbp/Cdc25b/Npm1/Camk2d/Mecp2/Anp32b/Rcc2/Ankrd17/Cnd3/Paf1/Lmnb1/Cnd2                                                                                                                       | 14 |
| Sat2/Cpx1/Mul1/Capp/Pcd2/Sptbn1/S1pr1/Tmod3/Fkbp4/Nas10/Parp1/Arb2/Npm1/Map4/Inpp5k/Ghlim/Argef1/Tspo/Atrx/Hgd1a/Pik3r1/Trks2/Filfil/Dnm2/Ficn/Emi4/Pml/Rad21/Myadm                                        | 30 |
| Syk/Rasa3/Itch/Ccib/Blla/Cd55/Cd81/Ptprc                                                                                                                                                                   | 8  |
| Hsp90aa1/Smad7/Syk/Rc3h2/Pcd2/Inpp5d/Hspb1/Sart1/Malt1/Zfp362/Nkbid/Sh2b3/Ptpr2/Ciptm1/Il4ra/Ccr7/Rhoh/Zc3h12a/Ptprc/Bcl6                                                                                  | 20 |
| Hsp90ab1/Hsp90aa1/Macf1/Mul1/Hgs4/Zeb2/S1pr1/Hnf1b/Bcl11a/Hf1/Atp5g1/Zfyve27/Dip2b/Golga4/Elf2b2/Iqgapp1/Mecp2/Cttnb1/Sk11/Dnm2/Dbnl/Cyfp2/Apoe/Gd1                                                        | 26 |
| Hspa8/Hspd1/Smad7/Syk/Artd5a/Clec2d/Malt1/Dhx36/Cr1/Cd84/Arb2/H2-Q7/Fbxo38/Dennd1b/H2-M3/Cd55/Stap1/H2-Q6/Il4ra/Rabge1/Bst2/H2-Q4/Cd81/Ptprc/H2-T23/Bcl6                                                   | 25 |
| Kmt2e/Artd4b/Sat1/Crebbp/Srpp3/Setd2/Myc/Cntf1/Parp1/Sirt1/Mt2/Kmt2c/Ogt/Snw1/Mecp2/Ehmt1/Iws1/Atrx/Pax5/Rhf1/Zc3h13/Cttnb1/Paf1/Kmt2a/Nsd1/Chtop/Pmt1                                                     | 27 |
| Hspbl/Syk/H2-Ab1/Malt1/Rasa3/Nkbid/Cd55/Il4ra/Ccr7/Cd81/Ptprc                                                                                                                                              | 11 |
| Klf4/Kmt2e/Casp2/Dgkz/Crebbp/Bcl2/Nfatc1/Zfp655/Camk2d/Anp32b/Ppp3ca/Ankrd17/Cnd3/Sde2/Pten/Rps6kb1/Paf1/Pml/Nasp/Gpr132/Cnd2                                                                              | 21 |
| Ubb/Jun/Hsp90ab1/Fos/Hspbl/Hspd1/MeF2c/Atf2/Pmaip1/Casp2/Pdx3/Egr1/Nr3c1/Tmem259/Bcl2/Parp1/Sirt1/Arnt2/Daxx/Atp5g1/Ikbb/Fis1/Kras/Npm1/Mecp2/Rock1/Cttnb1/Cd200/Bcl2l11/Apoe/Srpk2                        | 31 |
| Rrf125/Zc3hav1/Ankrd17/C1qbp/Usf15/Rmk3/Pum2                                                                                                                                                               | 7  |
| Neat1/Rps19/Ubtf/Smarca5/Sirt1/Ets1/Daxx/Usf36/Nsf1c/Reep3/Pe1/Bln1/Serbp1/Akap8/Pml/Srpk2                                                                                                                 | 16 |
| Sptbn1/Adam10/Map2k1/Cank2a1/Rap1a/Camk2d/Pgrmc1/Epb41/Rer1/Rhog/Atp2c1/Pik3r1/Ctco/Ppp2r5a/Vi1b/Numa1                                                                                                     | 16 |
| Shias5/Rps3/Tp1/Pmaip1/Casp2/Myc/Bcl2/Sirt1/Ep300/Snw1/Pik3r1/Sfn/Pml/Bcl2l11                                                                                                                              | 14 |
| Dnaj1a/Foxp1/Rnf6/Fkbp4/Sirt1/Daxx/Ep300/Artd1a                                                                                                                                                            | 8  |
| Klf4/MeF2c/Foxp1/Nfat3/Nr3c1/Parp1/Sirt1/Foxo1/Nfatc1/Camk2d/Cdk9/Ppp3ca/Rock1/Tbce/P2rx4                                                                                                                  | 15 |
| Sertad1/Foxp1/Mul1/Hnf1b/Rnf6/Cited2/Bcl11a/Bcl2/Sirt1/Ptprj/Dip2b/Eno1/Mecp2/Dnaj2/Mndal/Pten/Sk11/Bst2/Smarca2/Plac8/Ficn/Pml/Rad/Bcl6                                                                   | 24 |
| Tmed2/Nfe2l2/Ptpr2/Elf2ak3/Ptpn1                                                                                                                                                                           | 5  |
| Laptn5/Itch/Mylp/Apoe/Ptpr1                                                                                                                                                                                | 5  |
| Dnaj1a/Dusp1/Hpk3/Ptprj/Sh2b3/Inpp5k/Sk38/Irak3/Apoe/Ptpr1                                                                                                                                                 | 10 |
| MeF2c/Foxp1/Nr3c1/Parp1/Sirt1/Foxo1/Camk2d/Cdk9/Ppp3ca/Rock1/P2rx4                                                                                                                                         | 11 |
| Hsp90aa1/Mul1/Rrf125/Itch/Tspan32/Zc3hav1/C1qbp/Stat1/Pml/Rlk3/Zc3h12a                                                                                                                                     | 11 |
| Hspa8/Cf2/Nsf1/Capp/Sptbn1/Exoc4/Vamp3/Golga4/Vamp2/Atp2c1/Dnm2/Golga7/Vh1b/Sy1                                                                                                                            | 21 |
| Macf1/Nsf1/Laptn5/Sptbn1/Exoc4/Vamp3/Golga4/Vamp2/Atp2c1/Dnm2/Golga7/Vh1b/Sy1                                                                                                                              | 23 |
| Klf2/Foxp1/Tmod3/Cited2/Pahpc4/Ep300/Sh2b3/Nros/Rabgap1/Ptbp3/Ff1/Bcl6                                                                                                                                     | 12 |
| Hspa1b/H4a1/Gapdh/Klf4/Cpx1/Plaur/Pcd2/Arfp1/Arb2/Sat2/Cank2a1/Atf2/Mical1/Herpud1/Bln1/Frip1/RhG4/Sfn/Fcrr                                                                                                | 19 |
| Macf1/Dynl1/Zeb2/Hspb1/Dhx36/Bcl11a/Map2k1/Sirt1/Dynl1c/Itf1/Nfe2l2/Cux1/Ep300/Atp5g1/Zfyve27/Rala/Ikbb/Fbxo38/Golga4/Elf2b2/Rap1a/Iqgapp1/Kidins220/Plekhhm1/Tmem30a/Pik3r1/Ccr7/Sk11/Dnm2/Setx/Dnk       | 34 |
| Dnaj1a/Dusp1/Hspb1/Gadd45b/Hpk3/Sirt1/Ptprj/Ccib/Sh2b3/Npm1/Inpp5k/Ptpr2/Gadd45g/Sk38/Pten/Irak3/Ptprc/Dnaj3/Apoe/Ptpr1                                                                                    | 6  |
| Pcd2/Iws1/Poldip3/Eny2/Pabpn1/Nxf1                                                                                                                                                                         | 20 |
| Klf2/Ppp1r1/Sa/Klf4/Rhob/Atf2/Hspb1/Sp100/Sirt1/Ets1/Nfe2l2/Tcf4/Pde3b/Krt1/Pkcb/Sh2b3/Jak1/Mecp2/Rock1/Sars/Pgk1/Stat1/Cttnb1/Sp1/Ficn/Pml/Zc3h12a                                                        | 26 |
| Hspd1/Foxp1/Syk/Laptn5/Rel/Arb2/Nkbl1/C1qbp/Ccr7/Irak3                                                                                                                                                     | 10 |

|                                                                                                                                                                                                      |    |
|------------------------------------------------------------------------------------------------------------------------------------------------------------------------------------------------------|----|
| Hsp1/Foxp1/Gpx1/Hsp1/Alk2/Bcl2/Parp1/Sirt1/Nfe2l3/Zfp822/Cnmb1/Paap/Pml                                                                                                                              | 13 |
| Juv/Hsp1/Jund/Foxp1/SyK/Ingr1/Myo18a/Sbno2/Nmi/Cd84/Stap1/Itra/Cd200                                                                                                                                 | 13 |
| Klf4/Mef2c/Foxp1/Nr3c1/Parp1/Sirt1/Foxo1/Nfatc1/Cank2/Cdk9/Ppp3ca/Rock1/P2rx4                                                                                                                        | 13 |
| Nkbia/Sp100/Os9/Ankd1/3c/Chcd10/Nros/Si/Tspo/Rer1/Vps13a/Tnrc6a/Faf1/Pml                                                                                                                             | 13 |
| Macf1/Zeb2/Bcl11a/Map2k1/ist1/Atg5g1/Zfyve27/Golga4/Eif2b2/Sk11/Dnml/Apoe/Gdl1                                                                                                                       | 13 |
| Hsp1/Dhx36/Nmi/Setd2/Zc3hav1/Staf1/Chuk                                                                                                                                                              | 7  |
| Laptm5/Irch/Pk3/4/Myip/Uvrag/Apoe/Ptpn1                                                                                                                                                              | 7  |
| Smad7/Rc3h2/Malt1/IrH4/Nkbid/Ly9/Zc3h12a                                                                                                                                                             | 7  |
| Hspa1a/Hspa1b/Smad7/Arh1/Csnk1d/Gabarap/Ddrgk1/Herpud1/Zfand2a/Dnajb2/Chfr/Arh2                                                                                                                      | 12 |
| Mef2c/Nr3c1/Parp1/Sirt1/Cank2d/Cdk9/Ppp3ca/Rock1                                                                                                                                                     | 8  |
| Pde4b/Nkbia/Mef2c/Zfp36/SyK/And5a/Malt1/Cdcd47/Ppp115b/Sbno2/Cd84/Ogt/Cd55/Stap1/Nkbl1/Eif2ak3/Cd98/Stat1/Myd88/Tim12a/Paf1/Pabp1/Tmco1/Zc3h12a/Bcl2l11/Ppf8/Ly86/Vm                                 | 28 |
| Juv/Nr4a1/Klf4/Macfl1/Mef2c/Rhob/Foxp1/Gpx1/Irta4/Zeb2/Hsp1/Sp100/Lamor2/Sirt1/Ets1/Nfe2l3/Krl1/Bsig/Iqgap1/Mecp2/Rock1/Rcc2/C1qbp/Yhd3/Pten/Sp1/Fml/Zc3h12a/Prpc/Apoe/P2rx4/Iqsec1/Catr/Atp5a1      | 34 |
| Klf2/Inpp5d/Cd84/Arb2/Bank1/Rabgef1/Cd200/Irak3/Zc3h12a                                                                                                                                              | 9  |
| Dnaj1/Hsp1/Klf7/Sp100/Os9/Srx12/Pde3b/Inpp5k/Ogt/Ppp3ca/Der10/Eny2/Cd200/Ppp3ca/Apoe/Gdl1                                                                                                            | 16 |
| Pde4b/Wnk1/SyK/Rpl13a/Rps19/Irta4/Dusp1/S1pr1/Gpm3/Ano6/Adam10/Pprj/Bsg/Stap1/Rock1/Rhog/C1qbp/Dock8/Myd88/Cxcr5/Rabgef1/Ccr7/Chr2/Cd200/Rhob/Cd81/ManV/P2rx4/Catr/Ill17ra                           | 30 |
| Hsp90aa1/Wnk1/Nkbia/Hsp1/SyK/Rps19/S1pr1/Gpm3/Ano6/Hsp1/Adam10/Mat3/Nmi/Ets1/Pprj/H2-M3/Ak2/Zc3hav1/Stap1/Papc1/Ankrd17/C1qbp/Mnda/Usp15/Ccr7/Tim12a/Cd81/Rlok3/Pum2/Ly86/P2rx4/Catr/Ill1            | 33 |
| Foxo/Foxp1/Jumb/Clec2d/Inpp5d/Klf10/Tcrg1/Sbno2/Nfatc1/Pk3r1/Cnmb1/Cd81/Chuk/Tob2                                                                                                                    | 14 |
| Nr4a1/Klf4/Mef2c/Gpx1/Hsp1/Sirt1/Ets1/Nfe2l3/Mecp2/Sp1/Prpc/Apoe/P2rx4/Atp5a1                                                                                                                        | 14 |
| Hspa1b/Ppp115a/Nr4a1/Gapdh/Wnk1/Klf4/Gpx1/Kdm5a/Plaur/Pcid2/Bod1/Neil1/Tmed2/Ar6ip1/Arb2/lkbbk/Siah2/Cank2a1/Ak2/Mical1/Herpud1/Arfgef1/Rock1/Rcc2/Bin1/Fnip1/Broc6/Rnf54/SrnV/Fcmr                  | 30 |
| Hspa8/Hsp1/Smad7/Artd5a/Malt1/Cr11/H2-Q7/Fbox38/Denn1b/H2-M3/Cd55/H2-Q6/H2-Q4/Cd81/Ptprc/H2-T23                                                                                                      | 16 |
| Irs2/Pmaip1/Nr3c1/Sirt1/Foxo1/Ep300/Ak2/Inpp5k/Ogt/Ptpn2/Usp7/Supt20/Ncoa2/Sk11/Ranbp2                                                                                                               | 15 |
| Mef2c/Nr3c1/Parp1/Sirt1/Cank2d/Cdk9/Ppp3ca/Rock1                                                                                                                                                     | 8  |
| Hsp1/Dusp1/Rell1/Gadd45b/Gadd45g/Per1/Zc3h12a/Pmt1                                                                                                                                                   | 8  |
| Pgap1/Tmed5/Vapa/Tmed2/Sec24b/Axon1/Ergic3/Copb2/Tmed9/Preb/Ergic2/Trappc6b/Copa/Sec24c                                                                                                              | 14 |
| Mef2c/Naca/Plekho1/Egr1/Myc/Bcl2/Arpc5/Nfe2l2/Igapp1/Cank2/Rock1/Ill6st/Rps6kb1/Gna13                                                                                                                | 14 |
| Mef2c/Foxp1/Nr3c1/Parp1/Sirt1/Foxo1/Cank2d/Cdk9/Ppp3ca/Rock1/P2rx4                                                                                                                                   | 11 |
| Pdcd2/Dhx36/Nbp2/Bcl2/Fnip1/Hspa9/Fcn                                                                                                                                                                | 7  |
| Tmen259/Sirt1/Ptprc/Herpud1/Eif2ak3/Pk3r1/Arf6                                                                                                                                                       | 7  |
| Mul1/Arnt/Uba2/Sae1/Gn3                                                                                                                                                                              | 5  |
| Zfp36/Tnrc6a/Cnot1/Tnrc6c/Tnrc6b                                                                                                                                                                     | 5  |
| Gapdh/Atf3/Irs2/Pmaip1/Nr3c1/Myc/Sirt1/Foxo1/Ep300/Man2b1/Eno1/Ak2/Inpp5k/Ogt/Ptpn2/Usp7/Supt20/Pgk1/Ncoa2/Nisch/Pk3r1/Sk11/Ranbp2                                                                   | 23 |
| Kmt2b/Tmod3/Crebip/Cdc25b/Cank2d/Mecp2/Anp3z/Rcc2/Ankrd17/Cord3/Lmb1/Cend2                                                                                                                           | 12 |
| Hsp1/Foxp1/Smad7/SyK/Rc3h2/Malt1/Sbno2/Nmi/Ir4-Cd84/Nkbid/H2-M3/Gadd45g/Vamp2/Ly9/Myd88/Cd19l/Itra/Rabgef1/Ccr7/Dock2/Cd81/Rellb/Zc3h12a/Ptprc/Bcl6/Dock11                                           | 27 |
| Fkbp4/Fkbp1a/Nkr/Pp1g/Pp1w1/Ranbp2                                                                                                                                                                   | 6  |
| Ddrgk1/Ptprc2/Pk3r1/Atf6/Crebfr/Ptpn1                                                                                                                                                                | 6  |
| Hsp1/Foxp1/SyK/Laptm5/Rell/Arnt2/Nkbl1/C1qbp/Ccr7/Irak3                                                                                                                                              | 10 |
| Nkbia/Pk3ap1/Hsp1/Foxp1/Zfp36/Gpx1/Rps19/Tnfrs2/Gpm3/Sbno2/Nmi/Alk2/Ets1/Celf1/Siglecg/Ptprc2/Stap1/Nkbl1/Myd88/Rabgef1/Ccr7/Cnr2/Cd200/Cd81/Socs3/Apoe/Bcl6/Ill17ra                                 | 28 |
| Tmed5/Rab43/Lysmd3/Myo18a/Map2k1/Csnk1d/Tmed2/Nfil1c/Arfgef1/Tmed9/Ctic/Akap9/Dnm2/Wk1/Vti1b                                                                                                         | 15 |
| Foxp1/Smad7/Artd5a/Laptm5/Malt1/Dhx36/Sirt1/Siglecg/Denn1b/Dnajb9/Cd55/Cd86/Itra/Bat2/Irak3/Cd81/Ptprc/Bcl6                                                                                          | 18 |
| Mef2c/Foxp1/Akap13/Nfatc3/Nr3c1/Parp1/Sirt1/Foxo1/Cank2d/Cdk9/Ppp3ca/Rock1/P2rx4                                                                                                                     | 13 |
| Irs2/Pges3/Pmaip1/B3gn1/Nr3c1/Sirt1/Foxo1/Rb1/cc1/Ep300/Got1/Ak2/Inpp5k/Ogt/Ccg2/Ptprc2/Usp7/Mecp2/Plek/B3gn1/Supt20/Ncoa2/Ill6st/Pten/Sk11/Ranbp2                                                   | 25 |
| Hsp90ab1/Ppp115a/Mef2c/Bod1/Ppp115b/lkbbk/Smg5/Iqgap1/Inpp5k/Rock1/Plek/Ppp25a/Ppp2ca/Ptprc/Hsp90b1                                                                                                  | 15 |
| Mul1/Bcl11a/Egr1/Arnt/Uba2/Cnmb1/Sae1/Gn3                                                                                                                                                            | 8  |
| Smad7/Rc3h2/Irch/Cblb/Bta/Itra/Zc3h12a/Bcl6                                                                                                                                                          | 8  |
| Klf4/Mul1/Sk2b3/Ptprc2/Stap1/Ill6st/Yhd3/Rabgef1/Irak3/Ptprc                                                                                                                                         | 10 |
| Pde4b/Atf2b1/Msa41/Nfatc3/Ano6/Ahnac/Diaph1/Mcur1/Bcl2/Cd84/Arb2/Nfatc1/Pkcb/Fkbp1a/Cank2d/Inpp5k/Siv/Ppp3ca/Spoo/Ep41/Bin1/Atp2c1/Cd19/Dbl/Cnmb1/Ppp2ca/Tmco1/Pml/Ptprc/Radi/Cld7/P2rx4/Cherp       | 33 |
| Zfp36/Gpx1/Mul1/Rps19/Dusp1/Tnfrs2/Bcl2/Rnf125/Chd8/Nmi/Sig6a1/Ets1/Irch/Arb2/Siglecg/Sh2b3/Ptprc2/Stap1/Nkbl1/Yhl1/C1qbp/Yhd3/Usf15/Rab22b/Irak3/Rok3/Socs3/Apoe                                    | 30 |
| Juv/Hsp90ab1/Hsp1/Hsp1/Mef2c/Artd5a/Pmaip1/Casp2/Pdxc3/Egr1/Nr3c1/Bcl2/Parp1/Sirt1/Arnt/Fia1/Kras/Npm1/Mecp2/Rock1/Cnmb1/Bcl2l11/Apoe/Spk2                                                           | 24 |
| Mef2c/Naca/Tsc2d3/Bcl2/Cnmb1/Rps6kb1/Usp19                                                                                                                                                           | 7  |
| Zfp36/Fam172a/Snchd1/Lind1/Map2k1/Ubatf1/Smarc5/Ddx6/Sirt1/Celf1/Celf2/Mecp2/Nkbl1/Ppp3ca/Tnrc6a/Cnot1/Cnot2/Eif4e2/Tnrc6c/Zc3h12a/Pum2/Tnrc6b                                                       | 22 |
| Hsp1/Foxp1/Smad7/SyK/Rc3h2/Malt1/Sbno2/Nmi/Ir4-Cd84/Nkbid/H2-M3/Gadd45g/Vamp2/Ly9/Myd88/Cd19l/Itra/Rabgef1/Ccr7/Dock2/Cd81/Rellb/Zc3h12a/Ptprc/Bcl6/Dock11                                           | 27 |
| Pgap1/Zfhc3/Atg12/Zfhc18/Pk3c3/Ugcg/Nnt2/Dbl/Wip2/Golga7/Dpm1/Rab3gap1                                                                                                                               | 12 |
| Rps21/Fch1/Npm1/Abt1/Rrs1/Res1                                                                                                                                                                       | 6  |
| Sart3/Usp36/Usf7/Usf15/Eny2/Usf16                                                                                                                                                                    | 6  |
| Hsp1/Dhx36/Setd2/Zc3hav1/Staf1/Chuk                                                                                                                                                                  | 6  |
| Hsp90aa1/Smad7/SyK/Rc3h2/Hsp1/Sirt1/Malt1/Nkbid/Sh2b3/Ptprc2/Ciptm1/Itra/Ccr7/Rhoh/Zc3h12a/Ptprc/Bcl6                                                                                                | 17 |
| Foxp1/Hsp1/Malt1/Egr1/Ir8100582/4Rk/Arb2/Itra1/Myd88/Mnda/Ccr7/Pml/Zc3h12a                                                                                                                           | 12 |
| Klf4/Mef2c/Hsp1/Sirt1/Ets1/Nfe2l3/Mecp2/Sp1/Prpc/Apoe/P2rx4/Atp5a1                                                                                                                                   | 12 |
| Dock8/Ccr7/Dock2/Cd81/Mn                                                                                                                                                                             | 5  |
| Ptges3/Nr3c1/Artd1a/Per1/Ncoa2                                                                                                                                                                       | 5  |
| Hsp90ab1/Smad7/Zeb2/Cited2/Crebip/Sirt1/Ep300/Got1/Nros/Snw1/Sk11/Dnm2/Flcn/Glg1                                                                                                                     | 14 |
| Hspa1a/Hspa1b/Smad7/Arh1/Tmen259/Csnk1d/Gabarap/Ddrgk1/Herpud1/Zfand2a/Dnajb2/Chfr/Arh2                                                                                                              | 13 |
| Klf2/Hsp1/SyK/And5a/Laptm5/Inpp5d/Cd84/Arb2/Bsg/Bank1/Zbtb20/Myd88/Rabgef1/Cd200/Irak3/Zc3h12a/Ill17ra                                                                                               | 17 |
| Hsp90ab1/Ppp115a/Mef2c/Ppp115b/Plek/Ppp2ca/Ptprc                                                                                                                                                     | 7  |
| Rc3h2/Rps3/Laptm5/Lims1/Crebip/Nmi/Ep300/Nfat5/Cd86/Calr                                                                                                                                             | 10 |
| Dnaj1/Rps7/Smad7/Rps3/Arb2/Ogt/Irns1/abp/Usf4/Dnajb2/Cnmb1/Trip12                                                                                                                                    | 12 |
| Dnaj1/SyK/Akap13/Dusp1/Rps3/Zeb2/Hpk3/Ptprj/Kras/Sh2b3/Iqgap1/Inpp5k/Sh2b3/Map4k2/Ccr7/Irak3/Ptprc/Apoe/Ptpn1                                                                                        | 19 |
| Klf4/Mef2c/Rhob/Dusp1/Tmod3/Cited2/Sp100/Bc9/Cic4/Ptprj/Nfe2l3/Krl1/Mecp2/Stap1/Bin1/Trip53/Nip1/Nisch/Rabgef1/Pten/Cd200/Bat2/Flcn/Gna13/Apoe/Osbpl9/Calr                                           | 26 |
| Hsp90ab1/Rps7/Arnt1/Srx12/Cank2a1/Ddrgk1/Ctss/Smarcc1/Ogt/Usf7/Irak3/Myc2b/Pml/Usf19                                                                                                                 | 14 |
| Hsp1/Rhob/Foxp1/Gpx1/Rps3/Pdxc3/Kdm6b/Ppp115b/Bcl2/Sirt1/Nfe2l2/Oser1/Psapp/Setx                                                                                                                     | 14 |
| Mef2c/Foxp1/Akap13/Nfatc3/Nr3c1/Parp1/Sirt1/Foxo1/Cank2d/Cdk9/Ppp3ca/Rock1/P2rx4                                                                                                                     | 13 |
| Irs2/Pmaip1/Myc/Sirt1/Foxo1/Zbtb20/Ak2/Ptprc2/Nkbl1/Supt20/Sk11                                                                                                                                      | 11 |
| SyK/H2-Ab1/Rps3/Laptm5/Dhps/Rasa3/Irch/Cblb/Tnfrs13c/Bta/Cd55/Cd86/Ill6st/Cnmb1/Ccr7/Cd81/Pel1/Ptprc                                                                                                 | 29 |
| Irs2/Pmaip1/Egr1/Nr3c1/Map2k1/Myc/Erlin1/Parp1/Sirt1/Foxo1/Ep300/Zbtb20/Eno1/Ak2/Inpp5k/Ogt/Ptprc2/Usf7/Nkbl1/Plek/Eif2ak3/Supt20/Ncoa2/Dbl/Sk11/Lpgat1/Ranbp2/Flcn/Apoe                             | 18 |
| Laptm5/Dgkz/Eif1/Ptprj/Cblb/Ptprc2                                                                                                                                                                   | 6  |
| Hspa8/Gapdh/Naca/Bcl2/Sirt1/Arb2/Nfe2l2/Npm1/Cank2d/Pk3r1/Pten/Zc3h12a                                                                                                                               | 12 |
| Vps2b/Tim25/Top2b/Tim59/Vapa/Bcl2/Bsg/Zc3hav1/Inpp5k/Fam111a/Larp1/Bst2/Tim12a/Pml/Tim11/Spk2                                                                                                        | 16 |
| Gpx1/Artd4b/Cic4/Jmd1c/Sec24a/lkbbk/Rap1a/Com2/WnnFndc3a/Rock1/Atrx/Myd88/Sid2/Ill6st/Siv/Akap9/Spao/Sic4a7/MnV/Myadm/Cdc88c/Vm                                                                      | 23 |
| Mul1/Crebip/Sirt1/Foxd3/Ep300/Npm1/Myip/Chfr/Cdc88c                                                                                                                                                  | 9  |
| Hsp90ab1/Ppp115a/Bod1/Ppp115b/lkbbk/Rock1/Ppp2ca/Ptprc/Hsp90b1                                                                                                                                       | 9  |
| Klf4/Pcid2/Casp2/Dgkz/Bcl2/Zfp36/Zfp655/Topbp1/Chfr/Sde2/Pten/Irk/Pml/Rad21/Donson/Gpr132/Foxn3                                                                                                      | 17 |
| Hsp90ab1/Smad7/Zeb2/Cited2/Crebip/Sirt1/Ep300/Got1/Nros/Snw1/Sk11/Dnm2/Flcn/Glg1                                                                                                                     | 14 |
| Pcid2/Dhx36/Senp6/Naa10/Rnf4/Myc/Parp1/Smg5/Smg1/Atrx/Chfr/Tnks2/Cnmb1/Irk/Pml/Rad21/Gn3/Numa1                                                                                                       | 18 |
| Macf1/Zeb2/Irfd1/Rnf6/Bcl11a/Map2k1/ist1/Atg5g1/Zfyve27/Dip2b/Golga4/Eif2b2/Pten/Sk11/I/Dbn1/Apoe/Vim/Gdl1                                                                                           | 12 |
| Cempa7/Pp1/Setd2/Daxx/Rcc2/Atrx/Tnks2/Irk/Pml/Rad21/Gn3/Nepbl                                                                                                                                        | 18 |
| Hspa8/Hsp90ab1/SyK/Clec2d/Cr11/Arb2/H2-Q7/H2-M3/Cd55/Stap1/H2-Q6/H2-Q4/Bcl2l11/Ptprc/H2-T23                                                                                                          | 15 |
| Mef2c/Foxp1/Akap13/Nfatc3/Nr3c1/Parp1/Sirt1/Foxo1/Cank2d/Cdk9/Ppp3ca/Rock1/P2rx4                                                                                                                     | 13 |
| Hsp1/SyK/And5a/Ingr1/Hsp1/Cd84/Ptprj/Zbtb20/Pk3r1/Myd88/Ccr7/Ptprc                                                                                                                                   | 13 |
| Irs2/Pmaip1/Sirt1/Foxo1/Ak2/Ptprc2/Supt20/Sk11                                                                                                                                                       | 8  |
| Mef2c/Irs2/Bcl2/Tnfrs13c/Cd81/Pel1/I/Dbn1/Ptprc/Bcl6                                                                                                                                                 | 8  |
| Bod1/Pcna/Cdk9/Atrx/Fam111a/Tnfrs1/Nucks1/Donson                                                                                                                                                     | 8  |
| Smad7/Rc3h2/Malt1/Nkbid/Cd55/Itra/Ccr7/Cd81/Zc3h12a/Bcl6                                                                                                                                             | 10 |
| Ptges3/Nr3c1/Artd1a/Per1/Ncoa2                                                                                                                                                                       | 5  |
| Myc/Smarccl1/Smarcc1/Cebpg/Ard1a                                                                                                                                                                     | 5  |
| Ppp115a/Dusp1/Ppp115b/Ppp3ca/Ppp2r2a                                                                                                                                                                 | 5  |
| Dhx36/Daxx/Zfand2a/Zc3h12a/Sic38a2                                                                                                                                                                   | 5  |
| Klf2/Klf4/Mef2c/Nfe2l3/Nfat1                                                                                                                                                                         | 5  |
| Birc3/Nmi/UBE2d1/Birc2/Gabarap                                                                                                                                                                       | 17 |
| Atf2/Pdcd2/Cned2/Dhx36/Nbp2/Bcl2/Siglecg/Nfe2l2/Pm2c/Rrs1/Fnip1/Hspa9/Chd2/Flcn/Samd9/Ptprc/Pid4                                                                                                     | 15 |
| Dnaj1/Itra4/Atf2/Gadd45b/Hpk3/Irch/Rbl1cc1/Traf1/Gadd45b/Nkbl1/Map4k2/Zfp622/Per1/Zmynd11/Myd88/Spag9/Lmb1                                                                                           | 20 |
| Ct2/Sah2/Capp/Myo1c/Sp1bn1/Tmod3/Diaph1/Ptsp1/Arpc5/Fchs2/Mical1/Arfgef1/Plek/Hax1/Bmi1/Mts1/Filii/Dnml/Cyfp2/Myadm                                                                                  | 17 |
| Top2b/Rps3/Pcid2/Pds5a/Naa50/Naa10/Arhb/Nudo/Cank2a1/Rrs1/Ube2b/Krpb1/Rcc2/Atx/Tk1/Chfr/Top2b/Uvrag/Cnmb1/Irk/Akap8/Emi4/Rad21/Pum2/Esco1/Npbl/Numa1                                                 | 27 |
| Atp5a/Map2k1/Atpsc1/Myc/Parp1/Atpsg1/Eno1/Flcn/Atpsa1                                                                                                                                                | 9  |
| SyK/Irf4/Bcl2/Ptprc2/Ly9/Ccr7/Dock2/Sk11/Ptprc                                                                                                                                                       | 9  |
| Juv/Fos/Hsp1/Rhob/Foxp1/Rps3/Pdxc3/Kdm6b/Parp1/Sirt1/Nfe2l2/Oser1/Psapp/Setx/Chuk                                                                                                                    | 15 |
| Mef2c/Foxp1/Tac2d3/Irs2/Plekho2/Sig6a1/Myc/Sirt1/Nkbid/Fnip1/Dock8/Pten/Fcmr/Ccr7/Bcl2l11                                                                                                            | 15 |
| Smad7/Artd5a/Laptm5/Malt1/Dhx36/Sirt1/Denn1b/Cd55/Bat2/Irak3/Cd81/Bcl6                                                                                                                               | 12 |
| Zc3hav1/Ankrd17/Usf15/Pum2                                                                                                                                                                           | 4  |
| Laptm5/Irch/Apoe/Ptpn1                                                                                                                                                                               | 17 |
| Nkbia/Pk3ap1/Hsp1/Rnf125/Nmi/Ir4/Arb2/Zc3hav1/Ankrd17/Cd86/C1qbp/Myd88/Usf15/Irak3/Pel1/Rlok3/Pum2                                                                                                   | 4  |
| H13/Aup1/Os9/Herpud1/Der2/Set11                                                                                                                                                                      | 6  |
| Zfp36/Dx6/Tnrc6a/Eif4e2/Tnrc6c/Tnrc6b                                                                                                                                                                | 6  |
| Rnf125/Zc3hav1/Ankrd17/C1qbp/Usf15/Pum2                                                                                                                                                              | 6  |
| H13/Aup1/Os9/Herpud1/Der2/Set11                                                                                                                                                                      | 6  |
| Smad7/Artd5a/Rc3h2/Malt1/Nkbid/Zc3h12a                                                                                                                                                               | 6  |
| Hspa8/Top2b/Pcbp1/Vapa/Bcl2/Zc3hav1/Inpp5k/Atg162/Fam111a/Larp1/Bst2/Zc3h12a/Nuck1/Spk2                                                                                                              | 14 |
| Iff30/H2-Ab1/Arhb/H2-Q7/Wty/H2-Eb2/H2-M3/H2-Q6/Paap/Ccr7/H2-Q4/Rellb/H2-T23/Calr                                                                                                                     | 14 |
| Rhob/Lrcc6/Crebip/Dhx36/Egr1/Rnf4/Parp1/Sirt1/Sic12a6/Ep300/Got1/Npm1/Ak2/Pcna/Rcsd1/Trip53/Nip1/Pk3r1/Sde2/GH2H5/Cnmb1/Pten/Sk11/Rellb/Nucks1/Nipbl/Cend2                                           | 26 |
| Rhob/Lrcc6/Crebip/Dhx36/Egr1/Rnf4/Parp1/Sirt1/Sic12a6/Ep300/Got1/Npm1/Ak2/Pcna/Rcsd1/Trip53/Nip1/Pk3r1/Sde2/GH2H5/Cnmb1/Pten/Sk11/Rellb/Nucks1/Nipbl/Cend2                                           | 26 |
| Hspa8/Ano6/Myo18a/Ptprj/Rap1a/Stap1/Ccr7/Dock2/Dnm2/Ptprc/Calr                                                                                                                                       | 11 |
| Rc3h2/Pcid2/Cited2/Bcl2/Nk2/Kmt2a/Samd9/Bcl2l11                                                                                                                                                      | 8  |
| Gpx1/Klf7/Irs2/Cdcd186/Egr1/Sirt1/Nadk/Pde3b/Pkcb/Eif2b2/Zbtb20/Siv/Ogt/Nkbl1/Ppp3ca/Vamp2/Side2/Eny2/Ppp2ca                                                                                         | 19 |
| Hsp1/SyK/And5a/Ingr1/Hsp1/Cd2/Cd84/Ptprj/Zbtb20/Pk3r1/Myd88/Ccr7/Ptprc                                                                                                                               | 13 |
| Mef2c/Foxp1/Tac2d3/Irs2/Sig6a1/Myc/Sirt1/Nkbid/Fnip1/Dock8/Pten/Fcmr/Ccr7                                                                                                                            | 13 |
| Top2b/Pcid2/Pds5a/Naa50/Naa10/Nudo/Rrs1/Krpb1/Atrx/Chfr/Cnmb1/Irk/Akap8/Emi4/Rad21/Esco1/Npbl/Numa1                                                                                                  | 13 |
| Hsp90ab1/Hsp90aa1/Macfl1/Mef2c/Foxp1/Klf7/Irta4/Top2b/Rp24/Zeb2/Irfd1/Rnf6/Bcl11a/Map2k1/Bcl2/Ist1/Atpsg1/Zfyve27/Dip2b/Golga4/Bsg/Eif2b2/Groc10/B3gn2/Rhog/Tbce/Pten/Sk11/Dnm2/Rhob/Myc2b/Dbln1/Arp | 35 |
| Klf4/Plaur/Irf4/Myc/Hpk3/Parp1/Ep300/Ddrgk1/Cnmb1                                                                                                                                                    | 17 |
| Gpx1/Cept1/Pgap1/Inpp5d/Dgkz/Gpcpd1/Sirt1/Prpla7/Pk3c3/Scd1/Mboat7/Smg1/Chkb/Inpp5k/Mecp2/Plek/Hadha/Pk3r1/Ill6st/Sel1/Ill6st/16a/Dbl/Pten/Erlin1/Lpgat1/Dpm1/Socs3/Apoe/Dgka                        | 29 |
| Hsp90aa1/Hsp1/SyK/Rps19/Mat3/Nmi/Fbox38/H2-M3/Zc3hav1/Papc1/Ankrd17/Mnda/Usf15/Tim12a/Rlok3/Pum2/Ly86                                                                                                | 17 |
| Juv/Fos/Hsp1/Rhob/Foxp1/Gpx1/Rps3/Pdxc3/Kdm6b/Ppp115b/Bcl2/Parp1/Sirt1/Nfe2l2/Oser1/Psapp/Setx/Chuk                                                                                                  | 18 |
| Hsp90ab1/Ppp115a/Mef2c/Bod1/Ppp115b/lkbbk/Rock1/Plek/Ppp2ca/Ptprc/Hsp90b1                                                                                                                            | 11 |
| Ubb/Mul1/Pmaip1/Pdxc3/Myc/Bcl2/Parp1/Atpsg1/Got1/Ak2/Tspo                                                                                                                                            | 11 |
| Rps21/Fch1/Erns1/Pop7/Npm1/Faf1/Fip11/Rrs1/Hnp2/Zc3h12a                                                                                                                                              | 10 |
| Foxp1/Hsp1/Malt1/Egr1/Ir8100582/4Rk/Arb2/Itra1/Myd88/Mnda/Ccr7/Pml/Zc3h12a                                                                                                                           | 12 |
| Pk3ap1/Rnf125/Irf4/Arb2/Zc3hav1/Ankrd17/C1qbp/Usf15/Irak3/Pel1/Rlok3/Pum2                                                                                                                            | 12 |
| Gapdh/Atf3/Irs2/Pmaip1/Nr3c1/Myc/Sirt1/Foxo1/Ep300/Man2b1/Eno1/Ak2/Inpp5k/Ogt/Ptprc2/Usf7/Supt20/Pgk1/Ncoa2/Nisch/Pk3r1/Sk11/Ranbp2                                                                  | 23 |
| Cept1/Pgap1/Inpp5d/Dgkz/Gpcpd1/Prpla7/Pk3c3/Mboat7/Smg1/Chkb/Inpp5k/Mecp2/Plek/Hadha/Pk3r1/Abhd16a/Dbl/Pten/Erlin1/Lpgat1/Dpm1/Socs3/Dgka                                                            | 23 |
| Hsp90ab1/SyK/Akap13/Rps3/Zeb2/Map2k1/Cab39/Sirt1/Kras/Iqgap1/Map4k2/Higd1a/Ccn3/Ccr7/Sk11/Ppp2ca/Ptprc/Ptpn1/Cend2                                                                                   | 19 |
| Macf1/Irfd1/Rnf6/Bcl11a/ist1/Atpsg1/Zfyve27/Dip2b/Golga4/Eif2b2/Dnm2/Dnml/Apoe/Gdl1                                                                                                                  | 14 |

|                                                                                                                                                                                                   |    |
|---------------------------------------------------------------------------------------------------------------------------------------------------------------------------------------------------|----|
| Kf4/Km2e/Casp2/Dgkz/Crebbp/Bcl2/Zfp655/Anp32b/Ankrd17/Ccnd3/Sde2/Pten/Pml/Cnd2                                                                                                                    | 14 |
| Hsp90ab1/Junb/Igfa4/Dazap1/Xist/Pdx3/Clec2/Setd2/Map2k1/Arnt/Tmed2/Birc2/Bptf/Arid1a/Birc6/Sp1/Socs3                                                                                              | 17 |
| Klf2/Hspd1/Syk/Arid5a/Laptm5/Inpp5d/Cd84/Arnt2/Bsg/Bank1/Zbtb20/Myd88/Rabgef1/Cd200/Irak3/Zc3h12a/Il17ra                                                                                          | 17 |
| Foxp1/Pkcb/Stap1/Cd19/Cd81                                                                                                                                                                        | 5  |
| Chch2/Map2k1/Eno1/Ogt/Usp19                                                                                                                                                                       | 5  |
| Hsp17/Gpx1/Hspb1/Sirt1/Nfe22                                                                                                                                                                      | 5  |
| Smad7/Rc3h2/Mat1/Nkbid/Zc3h12a                                                                                                                                                                    | 5  |
| Wnk1/Igfa4/Dusp1/Gpsm3/Ano6/Adam10/Ptpry/Stap1/Rhog/C1qbp/Dock8/Myd88/Rabgef1/Ccr7/Cd200/Rhoc/Cd81/Men/P2rx4/Calr                                                                                 | 20 |
| Pds5a/Naa50/Naa10/Atrv/Rad21/Nipbl                                                                                                                                                                | 6  |
| Dnajb1/Ahsa1/Dnajb11/Zc3hav1/Dnajb2/Chtop                                                                                                                                                         | 6  |
| Zfp36/Ddx6/Tnrc6a/Eif4e2/Tnrc6c/Tnrc6b                                                                                                                                                            | 6  |
| Zfp36/Ddx6/Tnrc6a/Eif4e2/Tnrc6c/Tnrc6b                                                                                                                                                            | 6  |
| Hspa8/Gapdh/Naca/Bcl2/Sirt1/Arnt2/Nfe22/Npm1/Camk2d/Pik3r1/Pten/Zc3h12a                                                                                                                           | 12 |
| Nkbia/Syk/Laptm5/Lims1/Tnfr1/Ikbbk/Tnfr13c/Ptpr2/Sirt1/Chuk                                                                                                                                       | 10 |
| Klf4/Mef2c/Rhoc/Dusp1/Cited2/Sp100/Bcl2/Cic4/Ptpry/Nfe22/Krt11/Mecp2/Stap1/Trip53inp1/Nisch/Rabgef1/Pten/Cd200/Bst2/Fcn/Gna13/ApoE/Osbp8/Calr                                                     | 24 |
| Hsp90aa1/Sah2/Capp/Myc1c/Rps3/Sptbn1/Tmod3/Fkbp4/Clec2/Setd2/Map2k1/Arnt/Tmed2/Birc2/Bptf/Arid1a/Birc6/Sp1/Socs3                                                                                  | 24 |
| Mu1/Rps19/Clec2d/Rnf125/Nm/Ich/Arnt2/Ptpr2/C1qbp/Yhd3/Usp15/Irak3/Rlok3                                                                                                                           | 13 |
| Hspa8/Syk/Ano6/Myo18a/Ptpry/Rap1a/Stap1/Pten/Ccr7/Dock2/Dnm2/Ptprc/Calr                                                                                                                           | 13 |
| Igfa4/Crebbp/Map2k1/Ankrd11/Ep300/Rab3gap1/Chd7/Kat5a/Nipbl                                                                                                                                       | 9  |
| Gpx1/Egr1/Rnf4/Myc/Bcl2/Gt2h5/Pml/Ptprc                                                                                                                                                           | 8  |
| Dnajb1/Hsp17/Dusp1/Hipk3/Ich/Foxo1/Per1/Zmynd11                                                                                                                                                   | 8  |
| Dnajb1/Hsp17/Dusp1/Hipk3/Ich/Foxo1/Per1/Zmynd11                                                                                                                                                   | 8  |
| Iti1/Oa1/Ap6/Oa1/Hec1/Map2k1/Bcl2/Sirt1/Eif4g2/Foxo1/Usp36/Smg1/Csa/Rock1/Tspo/Trip53inp1/Larp1/Sik11/Trim12a/Fln/Atf/Zc3h12a/Bcl211/Rab3gap1                                                     | 22 |
| Zfp36/Lmd1/Map2k1/Ddx6/Ceif1/Ceif2/Mecp2/Nkbf1/Ppp3ca/Tnrc6a/Cnot1/Eif4e2/Tnrc6c/Zc3h12a/Pum2/Tnrc6b                                                                                              | 16 |
| Juv/Dhx36/Myc/Sub1/Med13/Bclaf1/Setx                                                                                                                                                              | 7  |
| Nr4a1/Klf4/Zfp36/Lnrc8/Gpx1/Atf2/Sirt1/Zfp36/2Tb1/x/Foxo1/Scf1/Ep300/Zad2/Eif2ak3/Lamb3/Opk3/Arh4/Plac8/Fcn/Zc3h12a/Osbp8/Nipbl                                                                   | 22 |
| Mef2c/Plekho2/Stgal1/Sirt1                                                                                                                                                                        | 4  |
| Dnajb1/Hsp17/Sp100/Oa9/Sirt1/Inpp5k/Ogt/Nsf1c/Der2/Cic4/Ppp2r5a/Ppp2ca/Fcn/Gd1                                                                                                                    | 14 |
| Kdm5a/Kdm6b/Umj1c/Ube2b/Kdm6a/Kdm7a                                                                                                                                                               | 6  |
| Kdm5a/Kdm6b/Umj1c/Ube2b/Kdm6a/Kdm7a                                                                                                                                                               | 6  |
| Hsp17/Gpx1/Hspb1/Parp1/Sirt1/Nfe22                                                                                                                                                                | 6  |
| Macf1/Dusp1/Dusp5/Kdm6b/Exoc4/Setd2/Arid1a/Rf1/Cnmb1/Tnrc6c/Paf1/Kdm6a                                                                                                                            | 12 |
| Kdm5a/Mor4d2/Sirt1/Tb1/x/Ep300/Fry/Per1/Akap8/Pml/Ek4/Bcl6/Nipbl                                                                                                                                  | 12 |
| Atad1/Nsf/Syk/Laptm5/Plekhh1/Ich/Arnt2/Vamp3/Lmbd1/Pik3r4/Myip/Ctcf/Uvrag/Dnm2/Cd81/ApoE/Ptpn1/Iqsec1                                                                                             | 18 |
| Mu1/Sh2b3/Ptpr2/Stap1/Nest1/Yhd3/Rabgef1/Irak3/Ptprc                                                                                                                                              | 9  |
| Dusp1/Dusp5/Setd2/Lb1/Bptf/Ankrd17/Rf1/Cnmb1/Tnrc6c/Paf1                                                                                                                                          | 10 |
| Ubb/Rpe7/Rp137/Rps20/Pmaip1/Sirt1/Npm1/Rs1/Ptfg1p/Rnf34                                                                                                                                           | 10 |
| Nkbia/Rnf125/Zc3hav1/Ankrd17/C1qbp/Usp15/Rlok3/Pum2                                                                                                                                               | 8  |
| Tpp1/Tcrg1/Nps13a/Paap/Cd81                                                                                                                                                                       | 5  |
| Kmt2e/Snw1/Rf1/Cnmb1/Kmt2a                                                                                                                                                                        | 5  |
| Arfip1/Zfyve27/Reep3/Rh3/Rab3gap1                                                                                                                                                                 | 5  |
| Tmed2/Nfe22/Ptpr2/Eif2ak3/Ptpr1                                                                                                                                                                   | 5  |
| Hspd1/Mef2c/Irs2/Inpp5d/Bcl2/Siglecg/Tnfr13c/Bta/Cd18/Cd81/Pell1/Ptprc/Bcl6                                                                                                                       | 13 |
| Juv/Hsp90ab1/Fos/Smad7/Atf2/Zeb2/Sptbn1/Cited2/Crebbp/Egr1/Sub1/Parp1/Sirt1/Arnt2/Ep300/Got1/Nros/Snw1/Myd88/Usp15/Sk11/Dnm2/Fcn/Pml/Zyx/Glg1/Hexa/Vim/Numa1                                      | 29 |
| Crebbp/Dhx36/Parp1/Sirt1/Ep300/Npm1/Pcna/Trip53inp1/Pik3r1/Sde2/Sk11                                                                                                                              | 11 |
| Pde4b/Wnk1/Atp2b1/Fyd5/Ntacc3/Ahnak/Diaph1/Bcl2/Cd84/Arnt2/Ikbbk/Fkbp1a/Camk2d/Akt2/Inpp5k/Sri/Tspo/Ep41/Vamp2/Bin1/Per1/Cd19/Dbl/Cnmb1/Pten/Akap9/Dnm2/Ppp2ca/Pml/Rrad/Chd7/P2rx4                | 32 |
| Dusp1/Dusp5/Setd2/Rf1/Cnmb1/Tnrc6c/Paf1                                                                                                                                                           | 7  |
| Mef2c/Rc3h2/Bcl2/Ikbbk/Tnfr13c/Bcl211/Dock11                                                                                                                                                      | 7  |
| Fkbp4/P4ha1/Fkbp1a/Nktr/Pp1g/Pow1/Ranbp2                                                                                                                                                          | 7  |
| Bod1/Pcna/Cdk9/Atrv/Fam111a/Tonf1/Nucks1                                                                                                                                                          | 7  |
| Nr4a1/Pde4b/Klf4/Mef2c/Foxp1/Smad7/Atf2b1/Akap13/Ntacc3/Tmed3/Nr3c1/Map2k1/Parp1/Sirt1/Foxo1/Ntacc1/Fkbp1a/Eno1/Camk2d/Nufs6/Sri/Cdk9/Ppp3ca/Grc10/Rock1/Rcad1/Bin1/Tbce/Akap9/Zc3h12a/P2rx4      | 31 |
| Rhoc/Foxp1/Gpx1/Kdm6b/Cic4/Ikbbk/Bsg/Rap1a/Cnm2/Rock1/Myd88/Cnmb1/Msn/Myadm                                                                                                                       | 14 |
| Irs2/Pmaip1/Nr3c1/Sirt1/Foxo1/Ep300/Akt2/Inpp5k/Ogt/Ptpr2/Usp7/Plek/Supt20/Ncca2/Sk11/Ranbp2                                                                                                      | 16 |
| Rhoc/Ikbbk/Rock1/Ep41/Plek/Rhog/Rhoc/Tnfr1/Calr                                                                                                                                                   | 9  |
| Phf14/Pbxip1/Rf4/Sirt1/Ldb1/Ep300/Par1/Kmt2a/Kat5a                                                                                                                                                | 9  |
| Smad7/Clec2a/Cr1/Cd84/Arnt2/Cd55/Rabgef1/Bst2/Ptprc/Bcl6                                                                                                                                          | 10 |
| Hsp90ab1/Hsp90aa1/Klf4/Pges2/Myc/Arnt2/Npm1/Camk2c/Pcna/Cnmb1                                                                                                                                     | 10 |
| Kf4/Rp24/Atf2/Pcid2/Casp2/Dgkz/Bcl2/Zfp362/Zfp655/Toppb1/Chfr/Sde2/Cnmb1/Pten/Vk/Pml/Rad21/Donson/Gpr132/Foxn3                                                                                    | 20 |
| Gpx1/Klf7/Ccdc188/Dhps/Map2k1/Sirt1/Nadk/Foxo1/Ptpry/Pde3b/Zbtb20/Inpp5k/Sri/Ogt/Ptpr2/Ppp3ca/Pik3r1/Sid2/Eny2/Sk11/Ppp2ca/Nucks1/Ptprc                                                           | 23 |
| Mef2c/Foxp1/Naca/Ntacc3/Nr3c1/Bcl2/Sirt1/Arnt2/Daxx/Ntacc1/Cnrd2/Cdk9/Mecp2/Ankrd17/Ep21                                                                                                          | 15 |
| Klf4/Km2e/Casp2/Dgkz/Crebbp/Bcl2/Zfp655/Anp32b/Ankrd17/Ccnd3/Sde2/Pten/Pml/Cnd2                                                                                                                   | 15 |
| Macf1/Actg1/Lims1/Ldb1/Ptpry/Iqgap1/Rock1/Rcc2/Pten                                                                                                                                               | 9  |
| Macf1/Actg1/Lims1/Ldb1/Ptpry/Iqgap1/Rock1/Rcc2/Pten                                                                                                                                               | 9  |
| Foxp1/Sirt1/Lbn/Cnot1/Per1/Cnot2/Calr                                                                                                                                                             | 7  |
| Hspa1a/Hspa1b/Serp8/Rnf4/Rae1/Ctcf/Numa1                                                                                                                                                          | 7  |
| Cdc25b/Iqgap1/Npm1/Camk2d/Mecp2/Rcc2/Chfr/Rad21/Donson/Lmb1/Gpr132/Foxn3                                                                                                                          | 12 |
| Hsp90ab1/Hsp90aa1/Ppp1r15a/Smad7/Bcl2/Bcar3/Arnt2/Akt2/Inpp5k/Ogt/Hax1/Fnip1/Pten/Akap9/Php/Nsd1                                                                                                  | 16 |
| Map2k1/Myc/Parp1/Ep300/Fis1/Zbtb20/Eno1/Ogt/Tspo/Cox7a2/Fcn                                                                                                                                       | 11 |
| Pde4b/Hsp17/Arid5a/Laptm5/Tcrg1/Cd2/Tnfr13c/H2-M3/Gadd45g/Ceblpg/Iifar1/C1qbp/Ccr7/Zc3h12a                                                                                                        | 14 |
| Gpx1/Klf7/Ccdc188/Dhps/Map2k1/Sirt1/Nadk/Foxo1/Ptpry/Pde3b/Zbtb20/Inpp5k/Sri/Ogt/Ptpr2/Ppp3ca/Pik3r1/Sid2/Eny2/Sk11/Ppp2ca/Nucks1/Ptprc                                                           | 23 |
| Pde4b/Mef2c/Tacc22d/Rc3h2/Pmaip1/Mir142hg/Tcrg1/Bcl2/Ikbbk/Sh2b3/Tnfr13c/Bcl211/Dock11                                                                                                            | 13 |
| Ich/Ctcf/Cd86/Ccr7/Irak3                                                                                                                                                                          | 5  |
| Rhoc/Foxp1/Bsg/Cnm2/Cnmb1                                                                                                                                                                         | 5  |
| Arnt2/Nkx1/C1qbp/Ccr7/Irak3                                                                                                                                                                       | 5  |
| Lmd1/Ddx6/Cnot1/Pan3/Cnot2                                                                                                                                                                        | 5  |
| Smad7/Rc3h2/Ira4/Zc3h12a/Bcl6                                                                                                                                                                     | 5  |
| Sirt1/Foxo1/Ptpr2/Supt20/Sk11                                                                                                                                                                     | 5  |
| Rhoc/Foxp1/Bsg/Cnm2/Cnmb1                                                                                                                                                                         | 5  |
| B3gnt7/Chst12/Nkx1/Yy11/B3gnt2/Ccnd3/Ctcf/Hexa                                                                                                                                                    | 8  |
| Smad7/Rc3h2/Hsp17/Nkbid/Ptpr2/Ira4/Zc3h12a/Bcl6                                                                                                                                                   | 8  |
| Hsp90ab1/Rps7/Cenk2a1/Odrpk1/Smarcc1/Ogt/Usp7/Pml                                                                                                                                                 | 8  |
| Wnk1/Klf4/Map1/Rps12/Rnf13/Zeb2/G3bp1/Cmah/Pbxip1/Lmd1/Chd8/Egr1/Myc/Csrk1d/Ldb1/Foxo1/Zran1/Cenk1g3/Siah2/Cenk2a1/Ube2b/Nkbf1/Rf1/Tks2/Cnmb1/Pten/Sk11/Cenk1a1/Paf1/Kdm6a/ApoE/Ccdc88c           | 32 |
| Hspa1a/Hspa1b/Ubb5/Rps3/Serp8/Rnf4/Csrk1d/Ndc80/Rae1/Map4/Kpn1/Mecp2/Atrv/Tbce/Ctcf/Uvrag/Numa1                                                                                                   | 17 |
| Cited2/Egr1/Hf1/an/Nfe22                                                                                                                                                                          | 4  |
| Kdm5a/Mor4d2/Sirt1/Tb1/x/Per1/Akap8/Pml/Ek4/Bcl6/Nipbl                                                                                                                                            | 10 |
| Juv/Fos/Wnk1/Mef2c/Junb/Junb/Ntacc3/Cic4/Iqgap1/Fus                                                                                                                                               | 10 |
| Gpx1/Mu1/Ptsr/Pmaip1/Arnt2/Chchd10/Ep300/Rala/Fis1/Gshim/Tspo/Hgd1a/Fcn/Bcl211                                                                                                                    | 14 |
| Sp100/Xpo1/Anp32b/Xpo8/Srh/Hspa8/Rbm22/Calr/Ceif1                                                                                                                                                 | 9  |
| Pde4b/Atp2b1/Ntacc3/Ahnak/Diaph1/Bcl2/Cd84/Arnt2/Fkbp1a/Camk2d/Inpp5k/Sri/Tspo/Ep41/Bin1/Cd19/Dbl/Cnmb1/Ppp2ca/Pml/Rrad/Chd7/P2rx4                                                                | 23 |
| Hsp90aa1/Sah2/Capp/Myc1c/Rps3/Sptbn1/Tmod3/Fkbp4/Arpc6/Fchs2d/Mecp2/Arfgef1/Hax1/Bin1/Fil/Akap9/Dnbl/Cyp2/Myadm/Numa1                                                                             | 20 |
| Rp35/Rp7a/Nkx1/Npm1/Nip2/Pes1                                                                                                                                                                     | 6  |
| Cdc25b/Npm1/Camk2d/Mecp2/Rcc2/Lmb1                                                                                                                                                                | 6  |
| Birc3/Nmi/Ube2d1/Birc2/Gabarap/Trip12                                                                                                                                                             | 6  |
| Juv/Klf4/Mef2c/Foxp1/Mef2d/S1pr1/Naa35/Egr1/Myc/Camk2d/Pik3r1/Myd88/Cnmb1/Pten/Psp6kb1/Gna13/ApoE                                                                                                 | 17 |
| Wnk1/Klf4/Map1/Rps12/Rnf13/Zeb2/G3bp1/Cmah/Pbxip1/Lmd1/Chd8/Egr1/Myc/Csrk1d/Ldb1/Foxo1/Zran1/Cenk1g3/Siah2/Cenk2a1/Ube2b/Nkbf1/Rf1/Tks2/Cnmb1/Pten/Sk11/Cenk1a1/Paf1/Kdm6a/ApoE/Ccdc88c           | 32 |
| Irs4/Bcl2/Ptpr2/Ly9/Dock2/Sk11/Ptprc                                                                                                                                                              | 7  |
| Ptpry/Pkcb/Lmbd1/Inpp5k/Ptpr2/Rps8kb1/Seca3                                                                                                                                                       | 7  |
| P2ry10/Atp2b1/Msa4a1/S1pr1/Tcrg1/Anxa7/Ccdc47/Diaph1/Mcur1/Bcl2/Pkcb/Fis1/Got1/Fkbp1a/Camk2d/Siv/Cd55/Herpud1/Atp2c1/Nfss/Cd19/Cxcr5/Dbl/Ccr7/Cu15/Gpr65/Tmco1/Pml/Gna13/Ptpr/ApoE/Chd7/P2rx4/Chc | 34 |
| Mef2c/Fbx20/Bcl2/Mecp2/Ppp3ca/Tspo/Git2/Dbl/Pten/Psp6kb1/ApoE/P2rx4                                                                                                                               | 12 |
| Klf4/Mef2c/Rhoc/Dusp1/Cited2/Sp100/Stgal1/Bcl2/Cic4/Ptpry/Nfe22/Krt11/Mecp2/Stap1/Trip53inp1/Nisch/Rabgef1/Pten/Cd200/Bst2/Fcn/Gna13/ApoE/Osbp8/Calr                                              | 26 |
| Smad7/Rc3h2/Mat1/Nkbid/Ira4/Ccr7/Zc3h12a/Bcl6                                                                                                                                                     | 8  |
| Klf4/Mef2c/Rhoc/Dusp1/Cited2/Sp100/Bcl2/Cic4/Ptpry/Nfe22/Krt11/Mecp2/Stap1/Trip53inp1/Nisch/Rabgef1/Pten/Cd200/Bst2/Fcn/Gna13/ApoE/Osbp8/Calr                                                     | 24 |
| Hsp90ab1/Rps7/Cenk2a1/Odrpk1/Smarcc1/Ogt/Usp7/Pml/Usp19                                                                                                                                           | 8  |
| Hspd1/Foxp1/Smad7/Rc3h2/Mat1/Ira4/Nkbid/H2-M3/Gadd45g/Ly9/Cd19/Ira4/Ccr7/Cd81/Relb/Zc3h12a/Ptprc/Bcl6/Dock11                                                                                      | 19 |
| Gpx1/Klf7/Irs2/Ccdc188/Egr1/Sirt1/Nadk/Pkcb/Eif2b2/Zbtb20/Sri/Ogt/Ppp3ca/Vamp2/Sid2/Eny2/Ppp2ca                                                                                                   | 17 |
| Hsp90aa1/Mu1/Atf2/Pmaip1/Myc/Chchd3/Bcl3/Dynl1c/Chchd10/Gshim/Bcl211/Hspa4                                                                                                                        | 12 |
| Dnajb1/Dusp1/Hipk3/Sirt1/Ptpry/Sh2b3/Inpp5k/Sk38/Pten/Irak3/ApoE/Ptpn1                                                                                                                            | 12 |
| Hsp90aa1/Hsp17/Hsp17/Mef2c/Syk/Irs2/H2-Ab1/Rps3/Pcid2/Inpp5d/Sart1/SH3bp1/Mat1/Dhps/Rasa3/Bcl2/Nkbid/H2-Eb2/Tnfr13c/Cd55/Cd86/Dock8/Myd88/Irs1/Kra4/Rhoc/Cd81/Pell1/Ptprc/Bcl6                    | 31 |
| Hspa8/Jun/Sk17b/Wnk1/Syk/Ck1c/Csrk1g3/Smg1/Cank2a1/Iqgap1/Sk2/Camk2d/Eif2ak3/Hspa9/Sk11/Ppp2ca/Irak3/Wk1/Ptprc/Ck4                                                                                | 20 |
| Klf2/Rc3h2/Bcl2/Tmed2/Cic4/Daxx/Ceif1/Ankrd11/Ep300/Ndus8/Ccm2/Kmt2c/Atx/Lncprnt/Tnks2/Plac8/Kdm6a/Chd7/Nipbl                                                                                     | 19 |
| Hsp90ab1/Ppp1r15a/Ppp1r15b/Ppp2ca/Ptprc                                                                                                                                                           | 5  |
| Cabin1/Atrv/Ubn1/Nasp/Supt16                                                                                                                                                                      | 5  |
| Juv/Fos/Nkbia/Nkx1/Chuk                                                                                                                                                                           | 5  |
| Dhx36/Myc/Parp1/Smg5/Smg1/Atrv/Tnks2/Cnmb1/Pml/Gn3                                                                                                                                                | 10 |
| Btb9/Ch8/Crebbp/Egr1/Mecp2/ApoE/Ccnd2                                                                                                                                                             | 7  |
| Sp100/Oa9/Ankrd13c/Chchd10/Tspo/Rer1/Pml                                                                                                                                                          | 7  |
| Smad7/Rc3h2/Cr11/Cd55/Ira4/Zc3h12a/Ptprc/Bcl6                                                                                                                                                     | 8  |
| Macf1/Atp5g1/Zfyve27/Golga4/Eif2b2/Dnbl/ApoE/Gd1                                                                                                                                                  | 8  |
| Kdm5a/Sirt1/Ep300/Fry/Akap8/Pml/Bcl6/Nipbl                                                                                                                                                        | 8  |
| Laptm5/Dgkz/Eif1/Ptpry/Ctcf/Ptpr2                                                                                                                                                                 | 6  |
| Vps37b/Tm25/Vapa/Trim12a/Pml/Tfm11                                                                                                                                                                | 6  |
| Klf7/Sp100/Oa9/Snx12/Pde4b/Inpp5k/Ogt/Ppp3ca/Der2/Eny2/Cd200/Ppp2ca/ApoE/Gd1                                                                                                                      | 14 |
| Kmt2e/Arnd4/Satb1/Crebbp/Snrp3/Setd2/Myc/Cntrl/Parp1/Sirt1/Mt2/Kmt2c/Ogt/Snw1/Mecp2/Ehmt1/Avs1/Atrv/Pax5/Rf1/Zc3h13/Cnmb1/Paf1/Kmt2a/Ned1/Chtop/Pmt1                                              | 27 |
| Rhoc/Foxp1/Hsp17/Sirt1/Ets1/Nfe22/Bsg/Sp1/Zc3h12a/P2rx4/Calr/Atf5a1                                                                                                                               | 12 |
| Igfa4/Lims1/Sf6g1/Vamp3/Rcc2/C1qbp/Lamb3/Dnm2/Myadm/Nedd9/Calr/Parvg                                                                                                                              | 12 |
| Macf1/Nsf/Sptbn1/Vamp3/Golga4/Vamp2/Atp2c1/Golga7/Sy11                                                                                                                                            | 9  |
| Rab43/Tcrg1/Atg12/Rb1ccc1/Pk3c3/Gabarap/Nsf1c/Trip53inp1/Wp2/Map1lc3a/Rab3gap1                                                                                                                    | 11 |
| Rps3/Tp11/Pmaip1/Smchd1/Setd2/Myc/Parp1/Sirt1/Smg1/Npm1/Pcna/Cdk9/Ceblpg/Nmcc4a/Ptfg1p/Fus/Bclaf1/Trip12/Pml                                                                                      | 19 |
| Juv/Fos/Wnk1/Mef2c/Junb/Junb/Ntacc3/Sic3oa5/Tcrg1/Anxa7/Bcl2/Cic4/Daxx/Nfe22/Iqgap1/Mecp2/Ppp3ca/Fus/Ppp2ca/Chuk/Glut1/P2rx4/Gd1                                                                  | 23 |
| Foxp1/Arid5a/Laptm5/Mat1/Dhx36/Sirt1/Denn1b/Dnajb9/Cd55/Cd86/Ira4/Cd81/Ptprc                                                                                                                      | 13 |
| Kmt2e/Tmod3/Crebbp/Cdc25b/Camk2d/Mecp2/Anp32b/Rcc2/Ankrd17/Ccnd3/Rps6kb1/Lmb1/Cnd2                                                                                                                | 13 |
| Rps2/Rpl13a/Eif2e2/Eif2sx                                                                                                                                                                         | 4  |
| Klf2/Snw1/Cnot1/Calr                                                                                                                                                                              | 4  |
| Ptpry/Rap1a/Rabgef1/Ptprc                                                                                                                                                                         | 4  |
| Sart3/Ichv/Dnajb2/Zc3h12a                                                                                                                                                                         | 4  |
| Erlin1/Nkx1/Plek/ApoE                                                                                                                                                                             | 4  |
| Hnmp1/Eif3e/Cdk9/Nucks1                                                                                                                                                                           | 4  |
| Gpx1/Klf7/Irs2/Ccdc188/Egr1/Sirt1/Nadk/Pkcb/Eif2b2/Zbtb20/Sri/Ogt/Ppp3ca/Vamp2/Sid2/Eny2/Ppp2ca                                                                                                   | 17 |
| Pds5a/Naa50/Naa10/Atrv/Cnmb1/Rad21/Escoc1/Nipbl                                                                                                                                                   | 8  |

|                                                                                                                                                                                                  |    |
|--------------------------------------------------------------------------------------------------------------------------------------------------------------------------------------------------|----|
| Hsp90aa1/Rel/Crebbp/Nmi/Zbt20/Zc3hav1/fnar1/Relb/Riok3                                                                                                                                           | 9  |
| Hsp90aa1/Rel/Crebbp/Nmi/Zbt20/Zc3hav1/fnar1/Relb/Riok3                                                                                                                                           | 9  |
| Klf4/Junb/Rpl13/Sk3b1/Matr3/Ctcd2/N4bp2/Wdr74/Med21/Cnot1/Cnot2/Cdk11b/Rfl1/Sp1/Nasp                                                                                                             | 15 |
| Rhob/Cdc42e2/Plekho1/Anx7/Sk3bp1/Lmd1/1Diaph1/Epb41/Arhgap15/Rhog/Rhoq/Phip/Brd1/Gna13/Msn                                                                                                       | 15 |
| Gpx1/Klf7/Ccdc186/Sirt1/Nadk/Pde3b/Prkcb/Zbt20/Sri/Ogt/Ppp3ca/Vamp2/Sit2/Eny2/Ppp2ca                                                                                                             | 15 |
| Mac1/Actg1/Lims1/Bcl2/Ldb1/Pprj/Iqgarp1/Rock1/Rcc2/Pten/Tin1                                                                                                                                     | 11 |
| Gpx1/Klf7/Ar2/Ccdc186/Egr1/Sirt1/Nadk/Pde3b/Prkcb/Zbt20/Sri/Ogt/Ppp3ca/Vamp2/Sit2/Eny2/Ppp2ca                                                                                                    | 17 |
| Me2c/Tsc2d3/Rc3h2/Pmaip1/Tcirg1/Bcl2/lkbbk/Tnfrs13c/Bcl2l11/Dock11                                                                                                                               | 10 |
| Ubb/Shias5/Rps7/Pmaip1/Sirt1/Ep300/Snr1/Ptlig1p/Sk11/Pmi                                                                                                                                         | 10 |
| Kdm5a/Kdm6b/Umj1c/Ube2b/Kdm6a/Kdm7a                                                                                                                                                              | 6  |
| Kdm5a/Kdm6b/Umj1c/Ube2b/Kdm6a/Kdm7a                                                                                                                                                              | 6  |
| Ah2/Rere/Herc1/Map2k1/Bcl2/Ldb1/Sec24b/Wnn/Arcn1/Mecc2/Ogdh/Ptap/Slc4a7                                                                                                                          | 13 |
| Gapdh/Tim25/Akap13/Dhx3b/Prkcb/lkbbk/Zc3hav1/Ankr17/Myd88/Ctmb1/Tim12a/Pel1/Chuk                                                                                                                 | 13 |
| Nk4a1/Pde4b/Wnk1/Syk/Rpl13a/Rps19/Dusp1/S1pr1/Gsm3/Ano6/Hsp11/Adam10/Arnt2/Ppry/Bsg/Stap1/Rhog/C1qbp/Cxcr5/Ccr7/Cnr2/P2rx4/Ca1r/Il17ra                                                           | 24 |
| Smad7/Arid5a/Laptm5/Malt1/Dhx36/Sirt1/Dennd1b/Cd55/Baz2/Itih3/Cd81/Bcl6                                                                                                                          | 12 |
| Crebbp/Dhx36/Parp1/Sirt1/Ep300/Npm1/Akt2/Pcna/Trip5inp1/Pik3r1/Soe2/Sk11                                                                                                                         | 12 |
| Atp6v0a1/Tcirg1/Clic4/Snarp1/Dmx1                                                                                                                                                                | 5  |
| Orc3/Bod1/Poik4/Polg/Topbp1/Npm1/Pcna/Cdk9/AtrX/Fam111a/Tons1/Nucks1/Donson/Spk2                                                                                                                 | 14 |
| Hsp90ab1/Hsp90aa1/Mact1/Irf1/Rnf48/Atpsg1/Zlyve27/Dig2b/Golga4/Eif2b/Dnm2/Dbl/Apoe/Gdi1                                                                                                          | 14 |
| Laptm5/Plekhl1/Map2k1/Srx12/Arf8b/Pik3c3/Vamp3/Usip7/Mecc2/Ctcs/Snf10/Vti1b/Spag9/Sys1/Msn                                                                                                       | 15 |
| Sit2/Capp/Myo1c/Sptbn1/Tmod3/Diaph1/Ptstbp1/Arpc5/Fchs2d/Argef1/Hax1/Bin1/Mts1/Flil1/Dbln1/Cyfp2/Myadm                                                                                           | 14 |
| Hspa8/Hspd1/Smad7/Arid5a/Ctcd2/Malt1/Cr11/Arnt2/H2-Q7/Fbx38/Dennd1b/H2-M3/Cd55/H2-Q6/H2-Q4/Cd81/Ptprc/H2-T23/Bcl6                                                                                | 17 |
| Atp5a/Map2k1/Atp5c1/Myo/Parp1/Atpsg1/Eno1/Ficn/Atp5a1                                                                                                                                            | 9  |
| Sp100/Onk3/Anrd13c/Chchd10/Tspo/Perr1/Vps13a/Tnrc6a/Pmi                                                                                                                                          | 9  |
| Me2c/Fbx20/Bcl2/Ep300/Mecc2/Ddb/Rps6bk1/Apoe                                                                                                                                                     | 8  |
| Mu1/Sp100/Sec22d3/Ptbn2/fnar1/Stat1/Myd88/Ythd3                                                                                                                                                  | 8  |
| Me2c/Naca/Tsc22d3/Bcl2/Ctmb1/Rps6bk1/Ficn/Usip9                                                                                                                                                  | 8  |
| Cdc25b/Topbp1/Camk2d/Mecc2/Rcc2/Chfr/Rad21/Donson/Lmnb1/Gpr132/Foxn3                                                                                                                             | 11 |
| Hspa8/Hsp90ab1/Gapdh/Rpl30/Syk/Rps19/Ctcd2/Cr11/Arf8b/Arnt2/H2-Q7/H2-M3/Cd55/Stap1/Ceppg/H2-Q6/Myd88/H2-Q4/Bcl2l11/Ptprc/H2-T23                                                                  | 21 |
| Hspa1a/Hspa1b/Rpl24/Pcid2/Pds5a/Naa50/Naa10/Nudo/Frs1/Nsf11c/Kpnb1/Reep3/Atrv/Ctcs/Cdk11b/Nk/Akap6/Phip/Emi4/Rad21/Nipbl/Numa1                                                                   | 22 |
| Dnaj1/Rps7/Smad7/Rps3/Arnt2/Ctfl/Nms1/abp/Tspo/Usip4/Trip12                                                                                                                                      | 10 |
| Me2c/Foxp1/Me2f/Rpl13/Akap13/Ah2/Ppsa2/Ano6/Ctcd2/Ankr11/Ep300/Sh2b3/Yf11/Rabgap11/Pev7/Fil1/Opa3/Glg1/Ptprc/Foxn3                                                                               | 20 |
| Dnaj1/Traf4/Gadd45b/Hpk3/Irb1/Bcl11/Traf1/Gadd45g/Map4k2/Zfp822/Per1/Zmynd11/Myd88/Lmnb1                                                                                                         | 14 |
| Me2c/Ep300/Sh2b3/Rabgap11/Fil1/S1pr1/Pmt1                                                                                                                                                        | 7  |
| Mact1/Herpud1/Zland2a/Sprp1/Tfam1/Sec63/Rab3gap1                                                                                                                                                 | 7  |
| Mact1/Actg1/Lims1/Sit2/Ldb1/Bcl2/Ldb1/Pprj/Plekha2/Iqgarp1/Rock1/Rcc2/C1qbp/Pik3r1/Pten/Dnm2/Myadm/Bcl6/Nedd9/Calr                                                                               | 19 |
| Pde4b/Wnk1/Syk/Rpl13a/Rps19/Dusp1/S1pr1/Gsm3/Ano6/Adam10/Ppry/Bsg/Stap1/C1qbp/Cxcr5/Ccr7/Cnr2/Ca1r/Il17ra                                                                                        | 24 |
| Ctcd2/Actg1/Sit2/Capp/Myo1c/Sptbn1/S1pr1/Tmod3/Arpc5/Fchs2d/Inpp5k/Argef1/Plek/Hax1/Bin1/Pik3r1/Mts1/Fil1/Gpr56/Dbln1/Cyfp2/Myadm                                                                | 22 |
| Mact1/Actg1/Lims1/Bcl2/Ldb1/Pprj/Plekha2/Iqgarp1/Rock1/Rcc2/Pik3r1/Pten/Bcl6                                                                                                                     | 12 |
| Mact1/Irf1/Rnf48/Atpsg1/Zlyve27/Dig2b/Golga4/Eif2b/Dnm2/Dbln1/Apoe/Gdi1                                                                                                                          | 13 |
| Atp5a/Map2k1/Atp5c1/Myo/Parp1/Atpsg1/Eno1/Ficn/Atp5a1                                                                                                                                            | 9  |
| Hsp90ab1/Myo1c/Pmaip1/Fis1/Akt2/Anp32b/Pcm1/Vamp2/Tmen30a/Pik3r1/Shv/Rbm22/Cd81/Zc3h12a                                                                                                          | 14 |
| Map2k1/Ccnt2/Cntn1/Cnmb1/Scab9/Supt16                                                                                                                                                            | 16 |
| Lims1/Pprj/Iqgarp1/Rock1/Pik3r1/Iqsec1                                                                                                                                                           | 6  |
| Pdm2/Inpp5d/Map2k1/Bcl2/Polg/Sirt1/Umj1c/c/Kras/Npm1/Ndufs6/Pax5/Lncrpnt/Baz2b/Pten/Pmi/Gna13/Sec63/Apoe/Bcl6/Kat5a/Calr                                                                         | 21 |
| Hspa1a/Hspa1b/hsp1/Mact1/Azin1/Rps3/Serp6/Fkbp4/Rnf4/Diaph1/Sirt1/Rae1/Xpo1/Npm1/Mecc2/Rock1/Ctcs/Akap9/Sk11/Emi4/Numa1                                                                          | 21 |
| Mact1/Nap111/Zeb2/Dhx36/Bcl11a/Map2k1/Myo1st1/Cux1/Atpsg1/Zlyve27/Golga4/Eif2b/Snr1/Tspo/Bin1/I6st4/Ctmb1/Sk11/Dbln1/Apoe/Vim/Gdi1                                                               | 23 |
| Tcirg1/Inpp5k/Stap1/Rcc2/Plek/Rhog/Plekhl1/Dbln1                                                                                                                                                 | 8  |
| Klf2/Hsp90aa1/Klf4/Dynll1/H2-M3/Akt2/Tspo/Dnm2/Zc3h12a/P2rx4                                                                                                                                     | 10 |
| Pgap1/Zfh3c3/Alg12/Zfh3c3/Pik3c3/Ugc9/Nm12/Dbl/Wip1/Golga7/Dpm1/Apoe/Rab3gap1                                                                                                                    | 13 |
| Wnk1/Mact1/Rps12/Rnf212/Zh3c2/G3bp1/Cmah/Pmp1/Lmd1/Chd8/Egr1/Cank1d/Foxo1/Zrnb1/Cank1g3/Siah2/Cskn2a1/Ube2b/Nfk1b1/Tnfr2/Sk11/Cank1a1/Apoe/Ccdc8b                                                | 24 |
| Hsp90ab1/Ar2/Myo1c/Pmaip1/Myo18a/Sirt1/Nadk/Fis1/Bsg/Akt2/Sra/Ang32b/Pcm1/Vamp2/Cd2ap/At2c1/Tmem30a/Pik3r1/Shv/Rbm22/Cd81/Zc3h12a/Gliud1/Crebrf                                                  | 24 |
| Rps8/Uba2/Rps5/Rpl18/Rplp2/Rpsa/Rpl19/Rpl9-ps6/Rps24/Rps26/Rps4x/Fau/Rpl8/Rp38/Rps21/Rps7/Rp37/Rps27/Rps20/Rpl30/Rps16/Rps2/Rpl13a/Rpl18a/Rpl13/Rps19/Rps13/Rps35/Rpl21/Rps12/Rps27a/Rp28/Rplc   | 46 |
| Rps8/Uba2/Rps5/Rpl18/Rplp2/Rpsa/Rpl19/Rpl9-ps6/Rps24/Rps26/Rps4x/Fau/Rpl8/Rp38/Rps21/Rps7/Rp37/Rps27/Rps20/Rpl30/Rps16/Rps2/Rpl13a/Rpl18a/Rpl13/Rps19/Rps13/Rps35/Rpl21/Rps12/Rps27a/Rp28/Rplc   | 47 |
| Rps8/Uba2/Rps5/Rpl18/Rplp2/Rpsa/Rpl19/Rpl9-ps6/Rps24/Rps26/Rps4x/Fau/Rpl8/Rp38/Rps21/Rps7/Rp37/Rps27/Rps20/Rpl30/Rps16/Rps2/Rpl13a/Rpl18a/Rpl13/Rps19/Rps13/Rps35/Rpl21/Rps12/Rps27a/Rp28/Rplc   | 46 |
| Rps8/Uba2/Rps5/Rpsa/Rps24/Rps26/Rps4x/Fau/Rpl21/Rps7/Rps27/Rps20/Rps16/Rps2/Rps19/Rps13/Rps12/Rps27a/Rps3/Rps10/Rps17/Rps28/Larp4                                                                | 23 |
| Rps8/Uba2/Rps5/Rpsa/Rps24/Rps26/Rps4x/Fau/Rpl21/Rps7/Rps27/Rps20/Rps16/Rps2/Rps19/Rps13/Rps12/Rps27a/Rps3/Rps10/Rps17/Rps28/Larp4                                                                | 23 |
| Uba2/Spt18/Rplp2/Rpl19/Rpl9-ps6/Rpl8/Rp38/Rpl37/Rp30/Rpl13a/Rpl18a/Rpl13/Rp35/Rpl21/Rps12/Rp28/Rpl24/Rpl14/Rp31/Rpl35a/Rpl15/Rpl36a/Rpl7a/Rpl39                                                  | 28 |
| Rpl18/Rpl19/Rps26/Rps4x/Rpl8/Rp38/Rps21/Rp30/Rpl18a/Rpl13/Rps13/Rps35/Rp39/Rps19/Rps13/Rps12/Rps27a/Rps3/Rpl39/Naa38/Fus/Larp1/Larp4/Larp4b/Vim/Calr                                             | 24 |
| Hspa1a/Hspa1b/Me2c/Malt1/Rbm39/Pmaip1/Snr1/Alps4a1/Pmi/STb1/Rsf7/Sap18/Pebp1/Sarf1/Dgkz/Dhx36/Srm2/Ndc1/Actn1/Ujsg36/Npm1/Snmp70/Dennd1b/Tcf12/Snrw1/Gcc10/Luc72/Pokip3/Smm1/Soe2/Zc3h13f1       | 50 |
| Rps4x/Tuba1a/Mbn1/Tim25/Tubb5/Zfp36/Rp28/Rc3h2/Pcbp1/G3bp1/Lmd1/Dhx36/Lam2/Pabpc4/Hmnp/Ddx6/Celf1/Iqgarp1/Dhx30/Cdk9/Kpnb1/Rock1/Tnrc6a/Cnot1/Poik3/Par3/Cnot2/Blnk/Ythd3/Eif4e2/Larp1/Tnrc6     | 40 |
| Rpl18/R19/Rps26/Rpl8/Rp38/Rps21/Rp30/Rpl18a/Rpl13/Rps13/Rp35a/Rpl7a/Rp39/Larp1/Larp4b                                                                                                            | 36 |
| Rps4x/Tuba1a/Mbn1/Tim25/Tubb5/Zfp36/Rp28/Rc3h2/Pcbp1/G3bp1/Lmd1/Dhx36/Lam2/Pabpc4/Ddx6/Celf1/Iqgarp1/Cdk9/Kpnb1/Rock1/Tnrc6a/Cnot1/Poik3/Par3/Cnot2/Blnk/Ythd3/Eif4e2/Larp1/Tnrc6c/Tim12a/Aba    | 38 |
| Uba2/Spt18/Rplp2/Rpl19/Rpl9-ps6/Rpl8/Rp38/Rpl37/Rp30/Rpl13a/Rpl18a/Rpl13/Rp35/Rpl21/Rps12/Rp28/Rp24/Rpl14/Rp31/Rpl35a/Rpl15/Rpl36a/Rpl7a/Rp39/Mrps12/Npm1/Mrps15                                 | 27 |
| N4a1/Gapdh/Caopy/Shias5/Tubb5/Myo1c/Pcid2/Rnf8/Anxa7/Vapa/Bcl2/Nup50/Parp1/Sirt1/Brnp/Ph20/Rb1cc1/Rae1/Xpo1/Pto1/Unc50/Nup88/Nup210/Nmm/Kpnb1/Mrps23/Pcm1/Casc3/Dnajb2/Bin1/Ankr117/Epc1/Eny2    | 49 |
| Ph1/4/Atf2/Naa35/Morf4i2/Gm16286/Naa50/Crebbp/Naa10/Ph20/Ep300/Naa38/Ogt/Naa15/Supt20/Brd9/Epc1/Eny2/Ep400/Ph20l1/Kat6a                                                                          | 20 |
| Ph1/4/Atf2/Naa35/Morf4i2/Gm16286/Naa50/Crebbp/Naa10/Ph20/Ep300/Naa38/Ogt/Naa15/Supt20/Brd9/Epc1/Eny2/Ep400/Ph20l1/Kat6a                                                                          | 20 |
| Hspa1ub/Hsp90aa1/Gapdh/Uba2/Spt18/Tuba1a/Mbn1/Atr1/Nsf7/Rps27a/Prk3/Exoc4/Tuba1b/Atp5c1/Ubc/Bcl2/Gli2/Rala/Tufm/Rap1a/Eno1/Ctcd2/Hsp90a/Pten/Anc2/Men/Atp6v1b2/Slic25a3/Gdi1/Atp5a1              | 40 |
| Jun/N4a1/FoxKf4/Jund/Smad7/Junb/Arid5a/Hmnpab/Cnem/Akt2/Natc3/Sap18/Tcos1/Pebp1/Lmd1/Crebbp/Hes6/Nubp2/Sub1/Amt/Parp1/Ets1/Tb11x/Ldb1/Mxd4/Nec2/Tcf4/Natc1/Ep300/Csnk2a1/GH2a2/Abt1/Tcf12        | 38 |
| Mbn1/Tim25/Zfp36/Rc3h2/G3bp1/Dhx36/Pabpc4/Ddx6/Celf1/Kpnb1/Rock1/Ythd3/Larp1/Abr22/Pum2/Larp4/Larp4b                                                                                             | 17 |
| Hspa8/Hsp90ab1/Laptm5/Atpsv0a1/Tcirg1/Lamor2/Arf8b/H2-Q7/Rb1cc1/Mar2b1/H2-B6/Gabarap/H2-M3/Lmbrd1/Cyb561a3/Atg162/Vps13a/Frip1/H2-Q6/Sit2/Uvrag/Lamor3/Map11c3a/Vti1b/H2-Q4/Spag9/Ficn/Atpsv0    | 30 |
| Sarb1/Sf5b1/Matr3/Clic4/Npm1/Snr1/Zfp326/Srm1/Ppig/Scat8/Akap8/Lbr/Lmri/Rad21/Ebna1/bp2/Lmnb1/Numa1                                                                                              | 16 |
| N4a1/Gapdh/Rnf6/Vapa/Bcl2/Nup50/Sirt1/Brnp/Ph20/Rb1cc1/Xpo1/Unc50/Nmm/Kpnb1/Mrps23/Pcm1/Casc3/Dnajb2/Ankr117/Epc1/Tnrc18/Ctmb1/Ranbp2/Lbr/Pmi/Pum2/4/Ostp8/Lmnb1/Cnd2                            | 30 |
| Sarb1/Rnf6/Crebbp/Sp100/Rnf4/Hpk3/Sirt1/Daxx/Tdp2/Ei2a/Topbp1/Cdk9/Atrv/Chfr/Pmi/Kat6a                                                                                                           | 16 |
| Fth1/Ftfl1/Actg1/Syk/Capp/Myo1c/Rab43/Tcirg1/Sk3bp1/Rpl13a/Rpl18a/Rpl18a/Rpl13/Rp35/Rpl21/Rps12/Rp28/Rp24/Rpl14/Rp31/Rpl35a/Rpl15/Rpl36a/Rpl7a/Rp39/Mrps12/Npm1/Mrps15                           | 47 |
| Mu1/Atfp21/H13/Atp6v0a1/Ccdc47/Aup1/Mcur1/Chchd3/Anfip1/Chchd10/H2-Q7/Scd1/Cux1/Zlyve27/Fis1/Unc50/Ktn1/Coq2/Ghntm/Vp23b/Srx3/Rer1/Ergic3/Dnajb2/Der2/Preb/Atpm2/Tfam1/Golga7/Tmco1/Sys1/Atf6    | 37 |
| Pripap2/Tcoa1/Poik4/Rplc/Rb1cc1/Pik3c3/lkbbk/Ccnt2/Poia2/GT2a2/Pkag1/Pcna/Snr1/Cnppd1/Pik34/Cdk9/Poia1/Ccnt1/Pik31/Ccnt3/Uvrag/Ppns1/GH2b/Rf1/Paf1/Chuk/Socs3/Ccnt2                              | 28 |
| Mu1/Atfp21/H13/Atp6v0a1/Ccdc47/Aup1/Mcur1/Chchd3/Anfip1/Chchd10/H2-Q7/Scd1/Cux1/Zlyve27/Fis1/Unc50/Ktn1/Coq2/Ghntm/Vp23b/Srx3/Rer1/Ergic3/Der2/Preb/Atpm2/Tfam1/Tmco1/Sys1/Atf6/Sic25a3/H2-T22   | 35 |
| Hspa8/Fth1/Ftfl1/Atg12/Aup1/Rb1cc1/Pk3c3/Gabarap/Atg162/Plekhl1/Trip5inp1/Uvrag/Wip20/Map11c3a                                                                                                   | 14 |
| Naa35/Gm16286/Naa50/Naa10/Naa38/Naa15                                                                                                                                                            | 6  |
| Sarb1/Sf5b1/Matr3/Clic4/Npm1/Snr1/Zfp326/Srm1/Ppig/Scat8/Akap8/Pmi/Rad21/Lmnb1/Numa1                                                                                                             | 15 |
| Actg1/Syk/Capp/Myo1c/Rab43/Tcirg1/Myo18a/H2-Q7/Pik3c3/Vamp3/Rap1a/Uvrag/Zyx/H2-T23/Pid4/Vim/Calr                                                                                                 | 17 |
| Hspa8/Pten/Sf5b1/Sarb1/Srm2/Snrp3/lay1/Lsm2/Rbm17/Rbm5/Snmp70/Snr1/Prl/Slb5/Casc3/Magoh/Luc72/Srm1/Lsm8/lk/Rbm22/Pwtd1/Hnmp11/Mtap1a/PspB                                                        | 24 |
| Ph1/4/Atf2/Morf4i2/Crebbp/Ph20/Ep300/Ogr/Supt20/Brd8/Epc1/Eny2/Ep400/Ph20l1/Kat6a                                                                                                                | 20 |
| Cytl1/Sla/Syk/Atp2b1/H13/Rasa3/Gng5/Cd2/Traf1/lkbbk/Kras/Birc2/Iqgarp1/Ppp3ca/Gng2/Mts1/Pten/Cnr2/Gna13/Chuk/Msn/Ptprc/Ptgn1                                                                     | 23 |
| Klf6/Smad7/Sp140/Traf4/Arf4/Malt1/Znrfd2/Ubt/Smarc5/Sirt1/Rae1/Herc4/Wdr43/Pipco1/Cd2ap/Fam111a/Mn1/Pax5/Nop56                                                                                   | 19 |
| Zfp36/Lmd1/Lsm2/Ddx4/Tnrc6a/Cnot1/Par3/Cnot2/Ythd3/Eif4e2/Tnrc6c/Tim12a/Zc3h12a/Tnrc6b                                                                                                           | 14 |
| Sf3b1/Sarb1/Srm2/Snrp3/lay1/Lsm2/Snmp70/Snr1/Casc3/Luc72/Lsm8/lk/Rbm22/Map1a/PrpB                                                                                                                | 15 |
| Afh4/Ccnt2/Snr1/Cdk9/Afh1/Ccnt1/Tons1/Rf1/Paf1/Ccnt1/Supt16                                                                                                                                      | 11 |
| Arid1b/Smarc5/Rf1/Smarc1/Brd9/Csnk2a1/Smarcc1/Bptf/Arid1a/Brd8/Ep400/Smarc2/Chd4                                                                                                                 | 13 |
| Arid1b/Smarc5/Rf1/Smarc1/Brd9/Csnk2a1/Smarcc1/Bptf/Arid1a/Brd8/Ep400/Smarc2/Chd4                                                                                                                 | 13 |
| Hspd1/Rps3/Timm8b/Atps5e/Pmpcb/Ndufs3/Ndufc1/Atp5c1/Mcur1/Chchd3/Bcl2/Nduf1/Polg/Cox7b/Sirt1/Ak2/Chchd10/Atpsg1/Tufm/Unc50/Ndufs8/Coq2/Nmm/Ghntm/Cade1/Sfkn3/Sic25a51/Ndufs8/Cox7a2/Hadha/Higd1  | 41 |
| Tex10/Pelp1/Kdm6b/Chd8/Snrp3/Sirt1/Ph20/Mit2/Kmt2c/Rioc1/Zc3h13/Kdm6a/Kmt2a/Nsd1/Pmt1                                                                                                            | 15 |
| Hsp90aa1/Mact1/Myo1c/Rps3/Plekho1/Tmod3/Diaph1/Pprj/Iqgarp1/Akt2/Inpp5k/Rfog1/Plek/Cd2ap/Dnm2/Dbln1/Atpsv1b2/Tin1/Myadm                                                                          | 19 |
| Hspa8/Pde4b/Mact1/Rpl8/Nsf/Rp38/Rps27/Rp30/Rpl18a/Rps19/Rps13/Rpl14/Rps3/Sptbn1/fhngp1/Hsp1/Adam10/Eif3a/Bcl11a/Nr3c1/Exoc4/Eif4g2/Arnt2/Map4/Ncoa2/Myd88/Ctmb1/Ppp2ca/Dbln1/P2rx4/Iqsec1        | 31 |
| Hspa1a/Hspa1b/Hsp90ab1/Gpx1/Arh1/Tdp2/Cabin1/Herpud1/Dnajb2/Peap/Ranbp2/Pabpn1/Nxf1                                                                                                              | 13 |
| Hspd1/Rhob/H2-Ab1/Plekhl1/Phd3/Map2k1/Srx12/Uhrf1p11/Ich1/Tmem127/H2-Q7/Hmnp3/Siah2/Mon2/Rap1a/H2-M3/Rcc2/Rabgarp1/Der12/H2-Q6/Uvrag/Rabgef1/Vti1b/H2-Q4/Sam99/H2-T23/Apoe/Pk4/Phn1/Tmem11       | 30 |
| Rps7/Ftfl1/Bms1/Wdr74/Rpl1/Rs1/Zfp622/Rioc1/Pes1/Phospho10/Rioc3/Nop56/Ebna1/bp2                                                                                                                 | 17 |
| Ganab/St3b/H13/Rnf125/P4ha1/Aup1/Sec11c/Arfip1/Dnajb11/Krtcap2/Sprp/Der2/Sel1/Faf1/Sec63/Hsp90b1/Calr                                                                                            | 13 |
| Jun/Fos/Jund/Smad7/Junb/Hmnpab/Cnem/Atf2/Tcoa1/Crebbp/Amt/Ldb1/Mxd4/Tcf4/GH2a2/Tcf12/Cebpa/GH2b/Ctmb1/Chd4                                                                                       | 20 |
| Pde4b/Mact1/Rpl8/Nsf/Rp38/Rps27/Rp30/Rpl18a/Rps19/Rps13/Rpl14/Rps3/Sptbn1/fhngp1/Hsp1/Adam10/Eif3a/Bcl11a/Nr3c1/Exoc4/Eif4g2/Arnt2/Map4/Ncoa2/Myd88/Ctmb1/Ppp2ca/Dbln1/P2rx4/Iqsec1              | 30 |
| Pmn/Sf5b1/Sarb1/Srm2/Snrp3/lay1/Lsm2/Snr1/Magoh/Srm1/Rbm22/Pwtd1/Hnmp11/PprfB                                                                                                                    | 14 |
| Rnf125/B3gn7/Stegal1/Mbtps1/H2-Q7/B3gn75/Cux1/Ujgoc/H2-M3/Unc50/Tvp23b/Yf11/Argef1/Rer1/B3gn12/Ergic3/Copt2/H2-Q6/Atpm21/Dnm2/Golga7/H2-Q4/Sys1/Glg1/H2-T23/Numa1                                | 26 |
| Cytl1/Sla/Syk/Atp2b1/Gng5/Cd2/Traf1/lkbbk/Kras/Birc2/Iqgarp1/Ppp3ca/Gng2/Mts1/Pten/Cnr2/Gna13/Chuk/Msn/Ptprc                                                                                     | 23 |
| Rb1cc1/lkbbk/Ccnt2/Pcna/Snr1/Cnppd1/Cdk9/Ccnt1/Ccnt3/Uvrag/GH2b/Chuk/Ccnt2                                                                                                                       | 10 |
| Hspa8/Pde4b/Mact1/Rpl8/Nsf/Rp38/Rps27/Rp30/Rpl18a/Rps19/Rps13/Rpl14/Rps3/Sptbn1/fhngp1/Hsp1/Adam10/Eif3a/Bcl11a/Nr3c1/Exoc4/Eif4g2/Arnt2/Map4/Ncoa2/Myd88/Ctmb1/Ppp2ca/Dbln1/P2rx4/Iqsec1        | 31 |
| Arid1b/Smarcc1/Brd9/Smarcc1/Arid1a/Smarc2                                                                                                                                                        | 6  |
| Hspa8/Gapdh/Rhob/H2-Ab1/Tp11/Tcirg1/Map2k1/Lamor2/Pik3c3/H2-Eb2/Rap1a/Kidins220/Zc3hav1/Pik34/Cyb561a3/Der12/Ccz1/Uvrag/Lamor3/Psap/Map11c3a/Bst2/Vti1b/Apoe                                     | 24 |
| Vps37b/Capp/Hepacam2/Arf8b/Clic4/Ist1/Nudo/Pik3c3/Cel2/Iqgarp1/Mical1/Rcc2/Birc6/Uvrag/Ficn/Emi4/Hsp90b1/Gln3/Safb/Gdi1                                                                          | 20 |
| Hspa8/Pde4b/Mact1/Rpl8/Nsf/Rp38/Rps27/Rp30/Rpl18a/Rps19/Rps13/Rpl14/Rps3/Sptbn1/fhngp1/Hsp1/Adam10/Eif3a/Bcl11a/Nr3c1/Exoc4/Eif4g2/Arnt2/Map4/Ncoa2/Myd88/Ctmb1/Ppp2ca/Dbln1/P2rx4/Iqsec1        | 31 |
| Rb1cc1/lkbbk/Ccnt2/Pkag1/Pcna/Snr1/Cnppd1/Cdk9/Ccnt1/Ccnt3/Uvrag/GH2b/Chuk/Ccnt2                                                                                                                 | 10 |
| Sf3b1/Sarb1/Srm2/Snrp3/Lsm2/Ppp58b/Lsm8/lk/Map1a/PrpB                                                                                                                                            | 14 |
| Hspa8/Hsp90ab1/Laptm5/Arf8b/H2-Q7/H2-Eb2/H2-M3/Lmbrd1/Cyb561a3/Vps13a/Frip1/H2-Q6/Sit2/Vti1b/H2-Q4/Spag9/Ficn/H2-T23/Uba1                                                                        | 19 |
| Hspa8/Hsp90ab1/Laptm5/Arf8b/H2-Q7/H2-Eb2/H2-M3/Lmbrd1/Cyb561a3/Vps13a/Frip1/H2-Q6/Sit2/Vti1b/H2-Q4/Spag9/Ficn/H2-T23/Uba1                                                                        | 19 |
| Sf3b1/Sarb1/Snrp3/Lsm2/Sarb1/Snmp70/Argef1/Luc72/Lsm8/U2surp/PrpB                                                                                                                                | 11 |
| Myo1c/Pcid2/Nup50/Rae1/Nup88/Nup210/Kpnb1/Eny2/Ranbp2/Lbr/Nxf1                                                                                                                                   | 10 |
| Sf3b1/Sarb1/Snrp3/Lsm2/Sarb1/Snmp70/Luc72/Lsm8/U2surp/PrpB                                                                                                                                       | 11 |
| Hspa8/Hsp1/Mact1/Tuba1a/Tubb5/Dynll1/Tp11/Bod1/Eif3a/Ptbp1/Klf21b/Fkbp4/Tuba1b/Rnf4/Map2k1/Cank1d/Dynll1c/Daxx/Nudo/Gabarap/Iqgarp1/Map4/Reep3/Rcc2/Tbca/Rass3/Ncoa2/Ctcs/Map11c3a/Dnm2/Emi4/Bcl | 4  |
| Fth1/Pk3c3/Plekhl1/Map11c3a                                                                                                                                                                      | 5  |
| Hsp90aa1/Mact1/Myo1c/Rps3/Plekho1/Diaph1/Pprj/Akt2/Inpp5k/Plek/Dnm2                                                                                                                              | 11 |
| Tex10/Pelp1/Kdm6b/Chd8/Sirt1/Ph20/Mit2/Kmt2c/Kdm6a/Kmt2a/Nsd1                                                                                                                                    | 11 |
| Hspd1/Rps3/Timm8b/Atps5e/Pmpcb/Ndufs3/Ndufc1/Atp5c1/Mcur1/Chchd3/Bcl2/Nduf1/Polg/Cox7b/Ak2/Chchd10/Atpsg1/Tufm/Ndufs8/Coq2/Ghntm/Cade1/Sfkn3/Sic25a51/Ndufs8/Cox7a2/Hadha/Higd1a/Ndufs5/Mtx1/H   | 35 |
| Sarb1/Tgp2b/Cenpa/Ddx6/Sirt1/Daxx/Ube2b/Mecc2/Cbx1/AtrX/Uhr2/Pmi/Uba1                                                                                                                            | 13 |
| Sf3b1/Sarb1/Srm2/Snrp3/Lsm2/Lsm8/lk/Map1a/PrpB                                                                                                                                                   | 9  |
| Cyfp/Mact1/Rhob/Akap13/Sptbn1/Hpp5d/Fry/Exoc4/Map2k1/Ptstbp1/Ich1/Daxx/Pkcb/Iqgarp1/Eno1/Akt2/Epb41/Cd2ap/Rhog/Fry/Ctmb1/Rhoq/Dbln1/Myadm/Osbpl8/Numa1                                           | 27 |
| H13/Ccdc47/Aup1/Arfip1/H2-Q7/Scd1/Zlyve27/Kfn1/Ergic3/Dnajb2/Der2/Preb/Tram1/Tmco1/Atf6/H2-T23/Calr                                                                                              | 18 |
| Arid1b/Smarcc1/Smarcc1/Arid1a/Smarc2                                                                                                                                                             | 6  |
| Hspa8/Hspa1a/Hspa1b/Hspdl/Brc3/Tuba1a/Tubb5/Atp2b1/Ms4a1/Myo1c/Pag1/Tpp1/Ahnak/Tuba1b/Lamor2/Cd2/Cr11/Cbb/Kras/Bsg/Birc2/Iqgarp1/Cd55/Pgk1/I6st4/Lamor3/Ctmb1/Ppp2ca/Ptprc/Myadm/Atps5a1         | 31 |
| Hspa8/Hspa1a/Hspa1b/Hspdl/Brc3/Tuba1a/Tubb5/Atp2b1/Ms4a1/Myo1c/Pag1/Tpp1/Ahnak/Tuba1b/Lamor2/Cd2/Cr11/Cbb/Kras/Bsg/Birc2/Iqgarp1/Cd55/Pgk1/I6st4/Lamor3/Ctmb1/Ppp2ca/Ptprc/Myadm/Atps5a1         | 31 |
| Hsp90aa1/Mact1/Atfp21/Adrgfs/Myo1c/Rps3/Sptbn1/Plekho1/Tmod3/Dgkz/Exoc4/Diaph1/Arpc5/Dynt1c/Ldb1/Pprj/Iqgarp1/Akt2/Inpp5k/Rock1/Plek/Cd2ap/Hax1/Dock4/Ctmb1/Dnm2/Dbln1/Atpsv1b2/Tin1/Myadm/Vim/A | 32 |
| Hspd1/Nsf/Trapp8/Plekhl1/Ccdc186/Arf5c/Myo18a/Adam10/Atph/Stegal1/Mbtps1/Inpp5k/Yf11/Argef1/Vamp2/Atp11b/Birc6/Atp2c1/Akap9/Dnm2/Golga7/Wk11/Trappc8b/Sys1/Glg1/Pid4                             | 26 |
| Sf3b1/Sarb1/Snrp3/Lsm2/Sarb1/Snmp70/Argef1/Luc72/Lsm8/U2surp/PrpB                                                                                                                                | 11 |
| Cnt2/Pcna/Snr1/Cnppd1/Cdk9/Ccnt1/Ccnt3/Ccnt2                                                                                                                                                     | 8  |
| Ah2/Morf42/Ph20/Brd8/Epc1/Ep400/Ph20l1                                                                                                                                                           | 7  |
| Mrps6/Tomm6/Mrps12/Atps5e/Mrps52/Pmpcb/Ndufs3/Ndufc1/Atp5c1/Chchd3/Nduf1/Polg/Chchd10/Atpsg1/Ndufs6/Mrps7/Mrps23/Ndufs8/Hadha/Ndufs5/Mtx1/Mrpl15/Atps5a1                                         | 23 |
| Dynll1/Capp/Rps3/Tp1/Hepacam2/Bod1/Diaph1/Myo/Arf8b/Csnk1d/Tb11x/Nudo/Rae1/Cdc25b/Npm1/Map4/Nsf11c/Cbx1/Rcc2/Epb41/Birc6/Ctcs/Ik/Ficn/Emi4/Nedd9/Numa1                                           | 27 |
| H13/Ccdc47/Aup1/Arfip1/H2-Q7/Scd1/Zlyve27/Kfn1/Ergic3/Der2/Preb/Tram1/Tmco1/Atf6/H2-T23/Calr                                                                                                     | 18 |
| Wdr74/Rpl1/Rs1/Zfp622/Pes1/Ebna1/bp2                                                                                                                                                             | 6  |
| Hspd1/Tmed5/Atph/Tmed2/Sec24b/Vamp3/Lmbrd1/Arcn1/Vamp2/Ergic3/Copt2/Hax1/Tmed9/Ctcs/Ergic2/Dnm2/Vti1b/Copa/Sec24c                                                                                | 19 |



|                                                                                                                                                                                                    |    |
|----------------------------------------------------------------------------------------------------------------------------------------------------------------------------------------------------|----|
| Jun/KH4/Myo/Srt1/Pok2a/Ogt/Cnbn1/Sp1                                                                                                                                                               | 8  |
| Fh1/Ft1/Pk3c3/Pkhm1/Map1/c3a                                                                                                                                                                       | 5  |
| Tmed5/H2-Q7/H2-M3/H2-Q6/Atp2c1/Pk3r1/Akap9/H2-Q4/Trapp6b/H2-T23                                                                                                                                    | 10 |
| Ppp1r1Sa/le5/Ppp1r15b/Ppp3ca/Ppp2a/Ppp25a/Ppp2ca/Tox4                                                                                                                                              | 8  |
| Ppp1r1Sa/le5/Ppp1r15b/Ppp3ca/Ppp2a/Ppp25a/Ppp2ca/Tox4                                                                                                                                              | 8  |
| H2-Ab1/H2-Q7/H2-Eb2/H2-M3/H2-Q6/H2-Q4/H2-T23                                                                                                                                                       | 7  |
| Dyn1l1/Capp/Rps3/Hepacam2/Dlaph1/Tb1x/Nudo/Rae1/Map4/Rcc2/Epb41/Ctcr/Ic/Flcn/Em4/Numa1                                                                                                             | 16 |
| Hsp1/Pmb3/Sec11c/Pmd3/Ubr1/Pamb6/Pmd2/Zland2a/Supt20/Dnajb2/Eny2/Pamd11                                                                                                                            | 12 |
| Lamtor2/Pde3b/Rap1a/Elmo1/Lamtor3                                                                                                                                                                  | 5  |
| Lamtor2/Pde3b/Rap1a/Elmo1/Lamtor3                                                                                                                                                                  | 5  |
| Fos/Jund/Kdm5a/Cenpa/Orc3/Pol44/I44/Parp1/Nfe2l2/Npm1/Tonsi/Cnrb1/Sp1/Chd4/Denson/Kat6a                                                                                                            | 16 |
| Hsp1/Hspa1b/Hsp1/Mrps6/Rps3/Mps12/Mpl52/Pmpcb/Acs1/Adh2/Polg/Tufm/Dhx30/Mps7/Mrps23/Cipp/C1qbp/Hadha/Tfam/Hspa9/Glut1/Ppnr1/Mrpl15                                                                 | 23 |
| H2-Q7/H2-M3/H2-Q6/Atp2c1/H2-Q4/H2-T23                                                                                                                                                              | 6  |
| Xst/Smchd1/Daxx/Birc2/Smarca1/Ube2b/Usp7                                                                                                                                                           | 7  |
| Hsp1/Pmb3/Pmd3/Ubr1/Pamb6/Pmd2/Zland2a/Dnajb2/Pamd11                                                                                                                                               | 9  |
| Smarca1/Smarca1/Arid1a/Smarca2                                                                                                                                                                     | 4  |
| Ccnt2/Snw1/Cdk9/Ccnt1/GItH5                                                                                                                                                                        | 5  |
| Cux1/Unc50/Tvp23b/Rer1/Ergic3/Atp2c1/Golga7/Sys1                                                                                                                                                   | 8  |
| Pol44/Smarca5/Pcna/Ube2b/Rfc1/Tonsi/Denson/Zmiz2/Bcl6                                                                                                                                              | 9  |
| Ccnt2/Snw1/Cdk9/Ccnt1                                                                                                                                                                              | 4  |
| Cytl1/Sla/Syk/Gng5/Rb1cc1/Pk3c3/Kras/Nmt2/Iqgap1/Eno1/Pk3r4/Vps13a/Gng2/Pk3r1/Cnrb1/Wip2/Cnr2/Pmi/Gna13/Zc3h12a/Socs3/Bcl211/Apoe/Numa1                                                            | 24 |
| Tmed5/Tmed2/Sec24b/Ergic3/Tmed9/Ergic2/Wt1b/Sec24c                                                                                                                                                 | 8  |
| Daxx/Birc2/Smarca1/Ube2b/Usp7                                                                                                                                                                      | 5  |
| Pnr1/Sap18/Acin1/Cas3/Magoh                                                                                                                                                                        | 15 |
| Hsp90aa1/Macr1/Atp2b1/Adgre5/Myo1c/Rps3/Sptbn1/Plekho1/Dlaph1/Ppr/Akt2/Inpp5b/Plek/Dock8/Dnm2                                                                                                      | 5  |
| Hsp1/Pmb3/Pmd3/Ubr1/Pamb6/Pmd2/Zland2a/Dnajb2/Pamd11                                                                                                                                               | 9  |
| Atp4b/Sec24b/Vamp3/Arcn1/Vamp2/Copb2/Ctic/Vt1b/Copa/Sec24c                                                                                                                                         | 10 |
| Hspa9/Hsp90ab1/Hsp90aa1/Ac1g/Hga4/Fkbp4/Exoc4/Arpc5/Polg/Srt1/Dynl1c/Atp5y1/Zlyve27/Pkcb/Got1/Iqgap1/Fkbp1a/Mical1/Ssi/Bin1/Git2/Dnm2/Ppp2ca/Srf10/Setx/Copa/P2rx4                                 | 27 |
| Pcna/Nm/Lbr/Lmb1                                                                                                                                                                                   | 4  |
| Rps8/Uba25/Rps5/Rpl18/Rplp2/Rpsa/Rpl19/Rpl19-ps6/Rps24/Rps26/Rps4x/Fau/Rpl8/Rpl38/Rps21/Rps7/Rpl37/Rps27/Rps20/Rpl30/Rps16/Rps2/Rpl13a/Rpl18a/Rpl13/Mps6/Rps19/Rps13/Rpl35/Rpl21/Rps12/Rps27a/Rpl1 | 52 |
| Hspa8/Hspa1a/Hspa1b/Ubb/Jun/Hsp90ab1/Dnaj1/Uba25/Nkbia/Hsp1/Cacypb/Actg1/Tubb5/Smad7/Syk/Mu1/Rps27a/H13/Htt/Hat4/H2-Ab1/Laptn5/Arh1/SH3kbp1/Tuba1b/Myc/Aap1/Ubc/Bcl2/Erln1/Ithc/A                  | 65 |
| Hspa8/Hspa1a/Hspa1b/Ubb/Jun/Hsp90ab1/Hsp90aa1/Dnaj1/Uba25/Nkbia/Hsp1/Cacypb/Actg1/Tubb5/Smad7/Syk/Mu1/Rps27a/H13/Htt/Hat4/H2-Ab1/Laptn5/Arh1/SH3kbp1/Tuba1b/Myc/Aap1/Ubc/Bcl2/Erln1/Arb2           | 62 |
| Jun/Dnaj1/Nr4a1/Fos/Chcd2/Nkbia/Klf4/Mef2c/Jund/Foxp1/Mef2d/Arid5a/Satb1/Rcc2z3/Atf2/Rgs3/Irf1/RH6/Hsp1/Cited2/Crebbp/Fkbp4/RH4/Hes6/Myc/Bcl2/Arnt/Parp1/Srt1/Nkbid/Ldb1/Htt/an/Daxx/Nfe2l2/Tct4/  | 59 |
| Rps5/Rps26/Rps7/Rpl30/Rps2/Zp36/Rpl13a/Rps13/Rpl35/Rpl24/Rc3/Rps3/Dazap1/Sg3b1/PCbp1/Ei3a/Dhx36/Srm2/Pabpc4/Hrnpb/Rom5/Ddx6/Zfp362/ElH2/Celf1/Hrnpa4/Purb/Srnp70/Celf2/Rbm51/Nhp2                  | 67 |
| Jun/Dnaj1/Nr4a1/Fos/Nkbia/Klf4/Jund/Foxp1/Arid5a/Atf2/Irf1/RH6/Hsp1/Cited2/Crebbp/Fkbp4/RH4/Hes6/Arnt/Parp1/Srt1/Nkbid/Ldb1/Htt/an/Daxx/Nfe2l2/Smarca1/Ntfc1/Ep300/Pkcb/Npm1/Med13/Gt2a2/Ddrgk1    | 55 |
| Dnaj1/Hspa1a/Trm25/Naca/Kdm5a/Arid5a/Rbm3/Med15/Sap18/Rere/Pbox1/Lmd1/Cited2/Crebbp/Bcl11a/Nr3c1/Nmi1/H4/N4bp2/Sub1/Hpk3/Rf1/Srt1/Ets1/Tb1x/Ldb1/Jmj1c/Daxx/Tcf4/Ep300/Pkcb/Npm1/Med13             | 61 |
| Jun/Cytl1/Demnd4/Eef1b2/Ralgapa1/Akap13/Srt1/Gpsm3/Rasa3/Lamtor2/Bcar3/Gd2/Krt11/Phy/EI2b2/Demnd1b/Rap1a/Rabgarp1/Iqgap1/Tagap/Elmo1/Argef1/Rasa2/Rcc2/Ahgap15/Rabgarp1/Git2/Ccz1/Fnip1/Preb/Do    | 52 |
| Jun/Cytl1/Demnd4/Eef1b2/Ralgapa1/Akap13/Srt1/Gpsm3/Rasa3/Lamtor2/Bcar3/Gd2/Krt11/Phy/EI2b2/Demnd1b/Rap1a/Rabgarp1/Iqgap1/Tagap/Elmo1/Argef1/Rasa2/Rcc2/Ahgap15/Rabgarp1/Git2/Ccz1/Fnip1/Preb/Do    | 52 |
| Dnaj1/Hspa8/Hspa1a/Hspa1b/Hsp90ab1/Hsp90aa1/Dnaj1/Naca/Pges3/Nudc3/Nudo/S13/Npm1/Dnajb1/Ube4b/Dnajb2/Bce/Hspa9/Hspa14/Srf10/Hsp90b1/Calr                                                           | 23 |
| Birc3/Trm25/Mu1/Htt/Rc3h2/Zfp1/RH213/RH6/RH125/Arh1/Mat1/Ube3b/RH4/Trm59/Neur3/Znr2/Ubr1/Ithc/Brap/Fbx3/Ube2l1/Ube2d1/Herc4/Ctbl/Siah2/Birc2/Ube2b/Cul1/Ube2h/Myip/Ube4b/Med21/Ube2                | 53 |
| Birc3/Trm25/Mu1/Htt/Rc3h2/Zfp1/RH213/RH6/RH125/Arh1/Mat1/Ube3b/RH4/Trm59/Neur3/Znr2/Ubr1/Ithc/Brap/Fbx3/Ube2l1/Ube2d1/Herc4/Ctbl/Siah2/Birc2/Ube2b/Cul1/Ube2h/Myip/Ube4b/Med21/Chf1                | 51 |
| Jun/Cytl1/Demnd4/Eef1b2/Ralgapa1/Akap13/Srt1/Rasa3/Lamtor2/Bcar3/Gd2/Phy/EI2b2/Demnd1b/Rap1a/Rabgarp1/Iqgap1/Tagap/Elmo1/Argef1/Rasa2/Rcc2/Ahgap15/Rabgarp1/Git2/Ccz1/Fnip1/Preb/Dock8/Ragge1/     | 50 |
| PH4/Kdm5a/Kmt2e/Nap111/Chd1/Chd8/Sbn2/Smarca5/Sart3/Rf1/Srt1/Tb1x/Daxx/Mt2/Brd9/Pkcb/Npm1/Ipo7/Smarca1/Kmt2e/Arg32b/Bpt/Atrv/Zmynd11/Sta1/Sbn1/Ing1/Usp15/Tonsi/Uhr2/Usp16/Smarca2/Nap1            | 40 |
| Nr4a1/Jund/Foxp1/Arid5a/Rnf6/Fkbp4/Rnf4/Rnf4/Srt1/Daxx/Smarca1/Ep300/Pkcb/Med13/Pcna/Snw1/Cnot1/Arid1a/Bdb/Stat1/Ncoa2/Pk3r1/Fus/Cnrb1/Frp12/Nsd1/Tob2/Calr                                        | 28 |
| Cytl1/Demnd4/Eef1b2/Akap13/Srt1/Lamtor2/Bcar3/EI2b2/Demnd1b/Rap1a/Rabgarp1/Iqgap1/Ccz1/Fnip1/Preb/Dock8/Ragge1b/Bap7/Gapv1/Lamtor3/Rabgarp1/Dock2/Ralgs2/Myctb2/Fcn/Ragge1/Rab3garp1/Cdc           | 31 |
| Dnaj1/Hspa8/Hspa1a/Hspa1b/Hsp90ab1/Dnaj1/Nkbia/Zp36/Pges3/Rps3/Ahsa1/Nr3c1/Fkbp4/S13/Fkbp1a/Dnajb9/Kpnb1/Nkib1/EI2a3/Dnajb2/Ctic/Tfam/Hspa9/Fat1/Hspa14/Usp19                                      | 26 |
| Hsp90aa1/Nst/Akap13/Myo1c/Cdc42se2/Sptbn1/Ccdc186/Exoc4/Lsm2/Map2k1/Dlaph1/Tmem127/Gd2/Xpo1/Golga4/Ipo7/Demnd1b/Rap1a/Rabgarp1/Iqgap1/Eno1/Mical1/Kpnb1/Xpo6/Rock1/Rcc2/Rabgarp1/Bin1/Preb/Ri      | 39 |
| Trm25/Naca/Kdm5a/Rbm39/Rere/Cited2/Crebbp/Nr3c1/Irf4/Sub1/Srt1/Ets1/Daxx/Ep300/Pkcb/Npm1/Med13/Birc2/Kmt2c/Snw1/Med21/Cebp2/Brd9/Ncoa2/Eny2/Fus/Cnrb1/Usp16/Smarca2/Tm12a/Pml/Nucks1/Zmiz2/        | 34 |
| Rps7/Zp36/Dazap1/Dhx36/Pabpc4/Hrnpb/Zfp362/Celf1/Hrnpa4/Ce12/Rbm51/Nhp2/Taf5/Fus/Larp1/Serbp1/Secisbp2/Zc3h2a/Pum2/Larp4/Larp4b                                                                    | 21 |
| Birc3/Trm25/Mu1/Htt/Rc3h2/Rnf6/RH125/Arh1/Ube3b/RH4/Trm59/Neur3/Znr2/Ubr1/Ithc/Brap/Ube2d1/Herc4/Ctbl/Siah2/Birc2/Cul1/Myip/Ube4b/Med21/Chf1/Rnf4/Rabgarp1/Uhr2/Tm12a/Ranp2/Arh2/Myctb2/Pel1       | 38 |
| Birc3/Trm25/Mu1/Htt/Rc3h2/Rnf6/RH125/Arh1/Ube3b/RH4/Trm59/Neur3/Znr2/Ubr1/Ithc/Brap/Ube2d1/Herc4/Ctbl/Siah2/Birc2/Cul1/Myip/Ube4b/Med21/Chf1/Rnf4/Rabgarp1/Uhr2/Tm12a/Arh2/Myctb2/Pel1/Frp12/      | 37 |
| Nst/Akap13/Myo1c/Cdc42se2/Ccdc186/Exoc4/Lsm2/Map2k1/Dlaph1/Tmem127/Gd2/Xpo1/Golga4/Ipo7/Demnd1b/Rap1a/Rabgarp1/Iqgap1/Mical1/Kpnb1/Xpo6/Rock1/Rcc2/Rabgarp1/Rabgarp1/Ranp2/Tpno1/Myctb2/Cyfl       | 34 |
| Nst/Dynl1/Top2b/Myo1c/Dgkz/Pdx3/Nei1/Map2k1/Srt1/Dynl1c/Tb1x/Tcf4/Ep300/For2a/Prrc2/Pcna/Usf7/Epb41/Vamp2/Cd2ap/Pk3r1/Ctfc/Cnrb1/Sae1/Ppp2ca/Sp1/Dbn1/Nipbl/Numa1/Foxn3                            | 30 |
| Htt/Chd1/Chd8/Smarca5/Atrv/And1a/Ep400/Smarca2/Chd2/Chd4/Chd7                                                                                                                                      | 11 |
| Rpsa/Ef1l/Rps35/Xist/EI3k/Ccdc47/Srnp3/Naas10/Ithc/Npm1/Srnp70/Cank2a1/Naas15/Spr1/C1qbp/Der1/Yhd3/Larp1/Serbp1/Secisbp2/Nemf/Tmco1/Zc3h12a/Prrt1                                                  | 24 |
| Hspa1a/Hsp1a/Rps21/Pe1p1/Srnt2/Exoc4/Map2k1/Parp1/Daxx/Smarca1/EI3a/Npm1/Birc2/Csrn2a1/Smarca1/Mecp2/Epb41/Hax1/Tnks2/Nipbl/Hypk                                                                   | 21 |
| Top2b/Htt/Pges3/Rps3/G3bp1/Nei1/Polid1/Chd1/Chd8/Dhx36/Smarca5/Polg/Tdp2/Dclre1c/Pcna/Bptf/Atrv/Rfc1/Arid1a/Top3b/Ep400/Smarca2/Chd2/Batf1/Chd4/Chd7/Pid4/Dnaase2a                                 | 28 |
| KH4/Crebbp/Foxo1/Met2/Ep300/Cnt2/Cdk9/Ehmt1/Nkib1/Per1/Sta1/Cnot2/Tmn/Cnrb1/Sp1/Chd4                                                                                                               | 17 |
| Hsp21/Mu1/Pges3/Rnf125/Chd8/Crebbp/Srt1/Daxx/Ep300/Npm1/Usp7/Ehmt1/Plt1p/RH34/Sk11                                                                                                                 | 15 |
| Hspa8/Hspa1a/Hspa1b/Dnajb11/Dnajb9/Der2/Hspa9/Hspa14/Dnajc3                                                                                                                                        | 9  |
| Foxp1/Arid5a/Rnf6/RH4/Daxx/Ep300/Pkcb/Snw1/Nsd1/Calr                                                                                                                                               | 10 |
| Hspa8/Phd1a1/Capp/Myo1c/Sptbn1/Tp1/Plekhb2/Anxa7/Sgk3/Snx12/Krt11/Fchs2/Pxd1/Npm1/Gitp/Demnd1b/Iqgap1/Ogt/Nsf1c/Rasa2/Epb41/Vamp2/Snx30/Bin1/Nc4/Nisch/Rnf34/Mts1/Flii/Pasp/Wip2/Map1/c3a/Ar       | 41 |
| Skt17b/Wnk1/Syk/Akap13/Cik1/Sgk3/Map2k1/Hpk3/Csnk1/Pkcb/Ikbb/Csnk1g3/Smg1/Cank2a1/Sik2/Cank2/Act2/Pk3r1/Pk3r4/Sk38/Cdk9/Map4k2/Rock1/EI2a3/Riok1/Tk1/Mast4/Cnd3/Map3k2/Cdk1b/Sbk1/S                | 40 |
| Jun/Fos/Smad7/Zeb2/Cited2/Crebbp/Parp1/Purb/Pp7/Fkbp1a/Tcf12/Snw1/Usp15/Cnrb1/Pml                                                                                                                  | 15 |
| Dnaj1/Hspa1a/Arid5a/Sap18/Rere/Pbox1/Lmd1/Cited2/Crebbp/Bcl11a/N4bp2/Dnajc3/Srt1/Tb1x/Daxx/Tcf4/Snw1/Mecp2/C1qbp/Zmynd11/Irf2bp2/Nsd1/Tob2                                                         | 23 |
| Top2b/Htt/G3bp1/Chd1/Chd8/Dhx36/Smarca5/Bptf/Atrv/Rfc1/Arid1a/Ep400/Smarca2/Chd2/Batf1/Chd4/Chd7                                                                                                   | 17 |
| Dnaj1/Hspa8/Hspa1a/Hspa1b/Hsp90ab1/Hsp90aa1/Hsp1/Ccdc47/Hspa9/Hspa14                                                                                                                               | 10 |
| Hsp90ab1/Wnk1/Klf4/Hpk3/Mat1/Map2k1/Cab39/Daxx/Cnt2/Npm1/Iqgap1/Klfn5220/Pkag1/Cnppd1/Cnt1/Pk3r1/Cnd3/Lamtor3/Sk111/Rhhv/Cnt1/Socs3/Dnajc3/Cnt2/Cnt2                                               | 25 |
| Skt17b/Wnk1/Sgk3/Hpk3/Csnk1/Ikbb/Csnk1g3/Smg1/Cank2a1/Sik2/Akt2/Pk3r4/Sk38/Map4k2/Rock1/EI2a3/Riok1/Tk1/Mast4/Sk111/Rps6k1/Csnk1a1/Vnk1/Riok3/Srp2                                                 | 26 |
| Hspa1a/Hsp90ab1/Hsp1/Mor1l/Rc3h2/Dhx36/Tuba1b/Srtpb/Dhx30/Ctic/Sid2/H2/Msr/Vim                                                                                                                     | 14 |
| Ei1/EI3/Eef1b2/Pcbp1/EI3a/EI3a/EI4g2/EI3e/Tufm/Purb/EI2b2/EI1ax/EI4e2/Larp1/Fnip1/Hspa9/Lbr/Dnajc3                                                                                                 | 16 |
| Dnajb1/Hspa8/Hspa1a/Hspa1b/Hsp90ab1/Dnaj1/Hsp1/Pges3/Ahsa1/S13/Birc2/Dnajb9/Dnajb2/Bin1/Fat2/Hpa2/Nipbl/Hypk                                                                                       | 16 |
| Atf2/Gm16286/Naa50/Crebbp/Naa10/Srt1/Smarca1/Ep300/Nmt2/Ogt/Naa15/Epc1/Cers4/Kat6a/Esco1                                                                                                           | 15 |
| Htt/G3bp1/Chd1/Chd8/Dhx36/Smarca5/Ddx6/Ddx50/Dhx30/Atrv/Ddx47/Ep400/Smarca2/Chd2/Setx/Chd4/Ddx24/Chd7/Ddx52                                                                                        | 19 |
| Bod1/Bcl2/Foxo1/Smg5/Ppp2a2a/Rps6k1/Ppp2ca/Ptpn1/Vim                                                                                                                                               | 9  |
| Nr4a1/Mef2c/Mef2d/Ralgapa1/Atf3/Top2b/Cenpa/Atf2/Bcl11a/Hes6/Vapa/Bcl2/Arnt/Tcf4/Ikbb/Gtf2a2/Sr/Tcf12/Zfp318/Uba2/Pk3r1/Bhhe40/Sae1/Ppp2ca/raK3/Pml/Atf6/Chuk/Hexa                                 | 29 |
| Ppp1r1Sa/Wnk1/Syk/fns2/Bod1/Pstpip1/Chcd3/Bcl2/Foxo1/Siglec9/Ikbb/Smg5/Jak1/Iqgap1/Cabin1/EI2a3/Pk3r1/Ppp2a2/Cnrb1/Rps6k1/Ppp2ca/Hsp90b1/Ptpn1/Vim                                                 | 24 |
| Hsp90ab1/Hsp90aa1/Fkbp4/Bin1/Ppp2a2/Ppp2ca/Apoe                                                                                                                                                    | 7  |
| Hsp21/Kdm5a/Kmt2e/Laptn5/Chd1/Chd8/Daxx/Mt2/Zranb1/Brd9/Bptf/Atrv/Dnajb2/Zmynd11/Ing1/Usp15/Zland6/Phip/Pmi/Kmt2a/Pprf/Kdm7a                                                                       | 22 |
| Pe1p1/Hsp1/Rnf4/Aup1/Rae1/Birc2/Nsf1c/Tax1/Top1/Uba2/Dnajb2/Fat1/Usp16/Serbp1/Pmi/Herc2                                                                                                            | 15 |
| Fos/Foxp1/Klf10/Egr1/Nr3c1/Myc/Ubtff/Pol2a/Npm1/Sta1                                                                                                                                               | 10 |
| Arid5a/Rnf4/Parp1/Pcna/Cnot1/Ncoa2/Pk3r1/Fus/Cnrb1/Nsd1                                                                                                                                            | 10 |
| Atf2/Gm16286/Naa50/Crebbp/Naa10/Ep300/Naa15/Epc1/Kat6a/Esco1                                                                                                                                       | 10 |
| Ei1/EI3/EI3k/EI3a/EI4g2/EI3e/Tufm/Purb/EI2b2/EI1ax/EI4e2/EI2e2/EI2e3x                                                                                                                              | 17 |
| Zfp36/Cnt2/Wdr43/Arp32b/Zfp326/Cnt1/Bin1/RH11/Fat1/Scal8/Pabpn1                                                                                                                                    | 11 |
| Ppp1r1Sa/fns2/Bod1/Pstpip1/Bcl2/Foxo1/Nkbb/Smg5/Jak1/Iqgap1/Cabin1/EI2a3/Pk3r1/Ppp2a2/Cnrb1/Rps6k1/Ppp2ca/Hsp90b1/Ptpn1/Vim                                                                        | 20 |
| Pe1p1/Rnf4/Uba2/Setp1/Pmi/Herc2                                                                                                                                                                    | 6  |
| Srt1/Arb2/Pde3b/Npm1/Ppp2ca/Seq5                                                                                                                                                                   | 6  |
| Dusp1/Srt1/Arb2/Ppp1/Ntate1/Iqgap1/Spag9/Prrt1                                                                                                                                                     | 8  |
| Atf2/Gm16286/Naa50/Crebbp/Naa10/Smarca1/Ep300/Ogt/Naa15/Epc1/Kat6a/Esco1                                                                                                                           | 12 |
| Hsp90aa1/EI3a/Nr3c1/Cd2/Ctbl/Sh2b3/Bank1/Ptpn2/Pcna/Stat1/Pk3r1/Bink/Pten/Need9/Ptpn1                                                                                                              | 10 |
| Ei1/EI3/Eef1b2/Pcbp1/EI3k/EI3a/EI4g2/EI3e/Tufm/Purb/EI2b2/EI1ax/EI2a3/EI4e2/Larp1/EI2e2/EI2e3x                                                                                                     | 15 |
| Ei1/EI3/Eef1b2/EI3k/EI3a/EI4g2/EI3e/Tufm/EI2b2/EI1ax/EI4e2/EI2e2/EI2e3x                                                                                                                            | 13 |
| Hspa1a/Hspa1b/Hsp90ab1/Hsp90aa1/Klf4/Mef2c/Mef2d/Top2b/Dhx36/Parp1/Smg5/Mecp2/Sp1/Akap8/Chd4/Nipbl                                                                                                 | 16 |
| Hspa8/Hspa1a/Hspa1b/Hsp90ab1/Hsp90aa1/Hsp1/Atad1/Nst/Rnf213/Atf5e/Klf21b/Atf5c/Smarca5/Rfc1/Hspa9/Hspa14/Smarca2/Hsp90b1/Hspa4/Atf5a1                                                              | 22 |
| Hspa1a/Hsp90ab1/Hsp90aa1/Gapdh/Crebbp/Ctic/Cnrb1/Numa1                                                                                                                                             | 8  |
| Arid5a/Med13/Brd9/Ncoa2/Fus/Trip12/Nsd1                                                                                                                                                            | 7  |
| Jun/Foxp1/Atf3/Satb1/Crem/Bach2/Ntact3/Pdm2/Zeb2/Mynn/Bcl11a/Nr3c1/Hes6/Myc/Foxp4/Foxo1/Mxd4/Ntact1/Purb/Zbtb20/Zbtb21/Eno1/Nkbf1/Zfp148/EV3/Bhhe40/Ccd21b/Bcl6                                    | 28 |
| Kdm5a/Kdm6b/Crebbp/Sbn2/Jmj1c/Foxo1/Ep300/Mecp2/Per1/Sbn1/Kdm6a/Tox4/Bcl6                                                                                                                          | 13 |
| Jun/Foxp1/Atf3/Satb1/Crem/Bach2/Ntact3/Pdm2/Zeb2/Mynn/Bcl11a/Nr3c1/Hes6/Myc/Foxp4/Foxo1/Mxd4/Ntact1/Purb/Zbtb20/Zbtb21/Eno1/Nkbf1/Zfp148/EV3/Bhhe40/Ccd21b/Bcl6                                    | 28 |
| Phd1a1/Capp/Pkxb2/Sgk3/Snx12/Krt11/Fchs2/Pxd1/Npm1/Demnd1b/Iqgap1/Ogt/Epb41/Snx30/Nc4/Nisch/Rnf34/Flii/Wip2/Arp22/Tin1/Osbp8/Svx29/Numa1                                                           | 24 |
| Rps5/Rpl18/Rps4/Rpl8/Rpl37/Mrps6/Rps13/Rps3/Npm1/Rs1/Mps7                                                                                                                                          | 11 |
| Srnp3/Sart3/Cnt2/Srnp70/Cdk9/Cnt1/Rbm22/Prrt8                                                                                                                                                      | 8  |
| Rps3/Rnf125/Arh1/Rnf4/Aup1/Siah2/Uba2/Arh2                                                                                                                                                         | 8  |
| Tsc22d3/Crebbp/Sht1/Tcf4/Tcf12/Bhhe40/Sp1                                                                                                                                                          | 7  |
| Laptn5/Daxx/Dnajb2/Usp15/Pmi                                                                                                                                                                       | 5  |
| Ube2l1/Ube2f1/Ube2d1/Ube2h/Ube2i/Ube2j/Birc6/Ube2g1                                                                                                                                                | 8  |
| H2-Q7/H2-Eb2/H2-M3/H2-Q6/Dock2/H2-Q4/H2-T23                                                                                                                                                        | 7  |
| Zfp36/fns2/Arb2-Q7/H2-M3/H2-Q6/H2-Q4/H2-T23/Srpk2                                                                                                                                                  | 9  |
| Hsp90ab1/Wnk1/Hsp1/Map2k1/Cab39/Daxx/Cnt2/Npm1/Iqgap1/Klfn5220/Pkag1/Cnppd1/Cnt1/Cnd3/Sk111/Cnrb1/Dnajc3/Cnt2/Cnt2                                                                                 | 19 |
| KH4/Smad7/Kdm6/Chd8/Tb1x/Foxo1/Pprj/Tcf4/Ep300/Csnk2a1/Cd2ap/Cnrb1                                                                                                                                 | 12 |
| Rpsa/EI3k/Cdc47/Naas10/Naas15/C1qbp/Yhd3/Serbp1/Tmco1/Zc3h12a                                                                                                                                      | 10 |
| Hspa8/Hsp90ab1/Nkbia/H2-Ab1/Tp1/Fkbp4/Brp/H2-Q7/H2-Eb2/Gtp/H2-M3/Fkbp1a/Ogt/Kpnb1/Ppp3ca/Ntrf/Fex7/H2-Q6/Hadha/Pk3r1/Ctic/Dbi/Peap/Rps6k1/Ppp2ca/Hsp90b1/Ptpn1/Vim                                 | 33 |
| Crebbp/Foxo1/Ep300/Cnt2/Cdk9/Nkib1/Tfam                                                                                                                                                            | 7  |
| Syk/Fkbp4/Bcar3/Pde3b/Ctbl/Stap1/Epb41/Pk3r1/Sfr/RH1/Cank1a1/Scal8/Socs3                                                                                                                           | 13 |
| Arid5a/Rc3h2/Dazap1/Csd1/Zc3h12a                                                                                                                                                                   | 5  |
| Fkbp4/Fkbp3/Fkbp1a/Nktr/Ppfg/Ppwd1/Ranb2                                                                                                                                                           | 7  |
| KH4/Atf2/Egr1/Srt1/Foxo1/Polr2a/Mecp2/Stat1/Chd7/Nipbl                                                                                                                                             | 10 |
| Cited2/Egr1/Ets1/Pcna/Stat1/Sp1                                                                                                                                                                    | 6  |
| Atf2/Gm16286/Naa50/Crebbp/Naa10/Smarca1/Ep300/Ogt/Naa15/Epc1/Kat6a/Esco1                                                                                                                           | 12 |
| Foxp1/Mat1/Cd2/Ahcy/Ldb1/Tcf4/Zlyve27/Myd88/Pabpn1/Ccdc88c                                                                                                                                         | 10 |
| Atf2/Zdhc3/Gm16286/Naa50/Crebbp/Naa10/Zdhc18/Srt1/Smarca1/Ep300/Ctbl/Mboat7/Nmt2/Kmt2c/Ogt/Naa15/Epc1/Hadha/Lggt1/Cers4/Kat6a/Esco1                                                                | 22 |
| Rps24/EI3l/Rps19/Celf1/EI2a3/Larp1/EI2a2                                                                                                                                                           | 7  |
| Atf2/Zdhc3/Gm16286/Naa50/Crebbp/Naa10/Zdhc18/Srt1/Smarca1/Ep300/Mboat7/Nmt2/Ogt/Naa15/Epc1/Hadha/Lggt1/Cers4/Kat6a/Esco1                                                                           | 20 |
| Dnajb1/Dnaj1a/Rps3/Nr3c1/S13/Fkbp1a/Dnajb9/Dnajb2                                                                                                                                                  | 8  |
| Arid1b/Rnf4/Smarca5/Cabin1/Arid1a/Nap1/Map114/Wk1/Supt16                                                                                                                                           | 8  |
| Ube2l1/Ube2e1/Ube2d1/Ube2b/Ube2h/Birc6/Ube2g1                                                                                                                                                      | 7  |
| Rps7/Rps13/Dhx36/Celf1/Larp1/Gn3                                                                                                                                                                   | 6  |
| Fkbp4/Fkbp3/Fkbp1a/Nktr/Ppfg/Ppwd1/Ranb2                                                                                                                                                           | 7  |
| Hsp90ab1/Rhob/Tuba1a/Ubb5/Rab43/Arf5c/Bms1/Fkbp4/Tuba1b/Rasd1/Ar18b/Rala/Tufm/Xras/Gimap6/EI2b2/Rap1a/Srpr/Rhog/Drm2/A44a/Rhoh/Gna13/Glut1/Rrad/Gn3/EI2e3x                                         | 27 |
| Gm16286/Naa50/Naas10/Naas15                                                                                                                                                                        | 4  |
| Ubb/Uba52/Rps27a/Ubc                                                                                                                                                                               | 4  |
| Atf2/Naas50/Crebbp/Ep300/Epc1/Kat6a/Esco1                                                                                                                                                          | 7  |
| Sh2/Dusp1/Dusp5/Ssu72/Ppp1/Cdc25b/Ppr2/Ppp3ca/Dusp16/Pp4a2/Pten/Ppp2a5/Ppm1g/Ppp2ca/Ppcc/Ptpn1                                                                                                     | 16 |
| Ei3a/Nr3c1/Cd2/Ctbl/Sh2b3/Ppnr2/Pcna/Stat1/Pk3r1/Ptpn1                                                                                                                                             | 10 |
| Wnk1/Rps7/Rpl37/Rps20/Smad7/Dynl1/Icd3/Dgkz/Bcl2/Daxx/Cank2d/Cd55/Fry/Frip1                                                                                                                        | 14 |
| Nkbia/Nkbid/Htt/Av/Ep300/Npm1/Fat1                                                                                                                                                                 | 6  |
| Akap13/Map2k1/Iqgap1/Spag9                                                                                                                                                                         | 4  |
| Ppp3ca/Ntrf/Ppp1/Ppwd1                                                                                                                                                                             | 4  |

|                                             |   |
|---------------------------------------------|---|
| Hsp90ab1/Cbx1/Cttnb1/Nop56                  | 4 |
| Hga4/H2-Ab1/Ep400/Ppp2ca                    | 4 |
| Tubb5/H2-G7/H2-M3/H2-Q6/H2-Q4/H2-T23/Atp5a1 | 7 |
| Hsp90ab1/Hsp90aa1/Ptges3/Pcna/Ncoa2         | 5 |
