# Supplementary material for: The Regulation Network of Glycerolipid Metabolism as Coregulators of Immunotherapy-Related Myocarditis
Source: Hindawi journal article supplement (doi:10.1155/2023/8774971), 2023-06-21
Supplement: f4 [file 8774971.f4.pdf]

|          |          |                                                  |       |          |             |             |             |                                                          |   |
|----------|----------|--------------------------------------------------|-------|----------|-------------|-------------|-------------|----------------------------------------------------------|---|
| mmu00350 | mmu00350 | Tyrosine metabolism                              | 1/579 | 40/9010  | 0.930243912 | 0.999996903 | 0.667946874 | Got1                                                     | 1 |
| mmu00970 | mmu00970 | Aminoacyl-tRNA biosynthesis                      | 2/579 | 66/9010  | 0.931651489 | 0.999996903 | 0.667946874 | Saru/Gars                                                | 2 |
| mmu03320 | mmu03320 | PPAR signaling pathway                           | 3/579 | 89/9010  | 0.931657127 | 0.999996903 | 0.667946874 | Ubc/Scd1/Obi                                             | 3 |
| mmu05410 | mmu05410 | Hypertrophic cardiomyopathy                      | 3/579 | 91/9010  | 0.937919185 | 0.999996903 | 0.667946874 | Actg1/Igga4/Prkag1                                       | 3 |
| mmu04610 | mmu04610 | Complement and coagulation cascades              | 3/579 | 94/9010  | 0.94632439  | 0.999996903 | 0.667946874 | Plaur/Cr11/Cd55                                          | 3 |
| mmu04924 | mmu04924 | Renin secretion                                  | 2/579 | 76/9010  | 0.960623344 | 0.999996903 | 0.667946874 | Pde3b/Ppp3ca                                             | 2 |
| mmu03460 | mmu03460 | Fanconi anemia pathway                           | 1/579 | 51/9010  | 0.966531866 | 0.999996903 | 0.667946874 | Top3b                                                    | 1 |
| mmu04974 | mmu04974 | Protein digestion and absorption                 | 3/579 | 108/9010 | 0.973289932 | 0.999996903 | 0.667946874 | Sic1a5/Prp/Sic38a2                                       | 3 |
| mmu00590 | mmu00590 | Arachidonic acid metabolism                      | 2/579 | 85/9010  | 0.978295746 | 0.999996903 | 0.667946874 | Ptges3/Zadh2                                             | 2 |
| mmu04260 | mmu04260 | Cardiac muscle contraction                       | 2/579 | 87/9010  | 0.978850375 | 0.999996903 | 0.667946874 | Cox7b/Cox7a2                                             | 2 |
| mmu04512 | mmu04512 | ECM-receptor interaction                         | 2/579 | 88/9010  | 0.98025668  | 0.999996903 | 0.667946874 | Itga4/Lamb3                                              | 2 |
| mmu04972 | mmu04972 | Pancreatic secretion                             | 3/579 | 114/9010 | 0.980362955 | 0.999996903 | 0.667946874 | Atp2b1/Prkcb/Rap1a                                       | 3 |
| mmu00983 | mmu00983 | Drug metabolism - other enzymes                  | 2/579 | 92/9010  | 0.984125062 | 0.999996903 | 0.667946874 | Umps/Gmps                                                | 2 |
| mmu04270 | mmu04270 | Vascular smooth muscle contraction               | 4/579 | 144/9010 | 0.985319576 | 0.999996903 | 0.667946874 | Map2k1/Prkcb/Rock1/Gna13                                 | 4 |
| mmu05414 | mmu05414 | Dilated cardiomyopathy                           | 2/579 | 94/9010  | 0.985855769 | 0.999996903 | 0.667946874 | Actg1/Igga4                                              | 2 |
| mmu05322 | mmu05322 | Systemic lupus erythematosus                     | 4/579 | 149/9010 | 0.988498257 | 0.999996903 | 0.667946874 | H2-Ab1/Snrd3/H2-Eb2/Cd86                                 | 4 |
| mmu04750 | mmu04750 | Inflammatory mediator regulation of TRP channels | 3/579 | 127/9010 | 0.990066095 | 0.999996903 | 0.667946874 | Prkcb/Camk2d/Pik3r1                                      | 3 |
| mmu00480 | mmu00480 | Glutathione metabolism                           | 1/579 | 72/9010  | 0.991785107 | 0.999996903 | 0.667946874 | Gpx1                                                     | 1 |
| mmu00980 | mmu00980 | Metabolism of xenobiotics by cytochrome P450     | 1/579 | 73/9010  | 0.992317264 | 0.999996903 | 0.667946874 | Ephx1                                                    | 1 |
| mmu05204 | mmu05204 | Chemical carcinogenesis - DNA adducts            | 1/579 | 84/9010  | 0.996324239 | 0.999996903 | 0.667946874 | Ephx1                                                    | 1 |
| mmu04060 | mmu04060 | Cytokine-cytokine receptor interaction           | 9/579 | 292/9010 | 0.99680333  | 0.999996903 | 0.667946874 | Il10ra/Ihgr1/Tnfrsf13c/Ihna1/Ihst/Cxcr5/Ihna/Ccr7/Ih17ra | 9 |
| mmu05034 | mmu05034 | Alcoholism                                       | 5/579 | 205/9010 | 0.997567467 | 0.999996903 | 0.667946874 | Ahf2/Map2k1/Gng5/Kras/Gng2                               | 5 |
| mmu05150 | mmu05150 | Staphylococcus aureus infection                  | 2/579 | 128/9010 | 0.998106334 | 0.999996903 | 0.667946874 | H2-Ab1/H2-Eb2                                            | 2 |
| mmu04976 | mmu04976 | Bile secretion                                   | 1/579 | 100/9010 | 0.998744206 | 0.999996903 | 0.667946874 | Ephx1                                                    | 1 |
| mmu04020 | mmu04020 | Calcium signaling pathway                        | 5/579 | 240/9010 | 0.999590311 | 0.999996903 | 0.667946874 | Atp2b1/Prkcb/Camk2d/Ppp3ca/P2rx4                         | 5 |
| mmu04080 | mmu04080 | Neuroactive ligand-receptor interaction          | 7/579 | 386/9010 | 0.999996903 | 0.999996903 | 0.667946874 | P2ry10/S1pr4/S1pr1/Nr3c1/Tspo/Cnr2/P2rx4                 | 7 |
