# Supplementary material for: The Regulation Network of Glycerolipid Metabolism as Coregulators of Immunotherapy-Related Myocarditis
Source: Hindawi journal article supplement (doi:10.1155/2023/8774971), 2023-06-21
Supplement: f6 [file 8774971.f6.pdf]

Table S6

| Index    | Formula    | Compounds                                                                                                                                                                                                                                                                                                                                                                                                                                                                                                                                                                                                                                                                                                                                                                                                                                                                                                                                                                                                                                                                                                                                                                                                                                                                                                                                                                                                                                                                                                                                                                                                                                                                                                                                                                                                                                                                                                                                                                                                                                                                                                                                                                                                                                                                                                                                                                                                                                                                                                                                                                                                                                                                                                                                                                                                                                                                                                                                                                                                                                                                                                                                                                                                                                                                                                                                                                                                                                                                                                                                                                                                                                                                                                                                                                                                                                                                                                                                                                                                                                                                                                                                                                                                                                                                                                                                                                                                                                                                                                                                                                                                                                                                                                                                                                                                                                                                                                                                                                                                                                                                                                                                                                                                                                                                                                                                                                                                                                                                                                                                                                                                                                                                                                                                                                                                                                                                                                                                                                                                                                                                                                                                                                                                                                                                                                                                                                                                                                                                                                                                                                                                                                                                                                                                                                                                                                                                                                                                                                                                                                                                                                                                                                                                                                                                                                                                                                                                                                                                                                                                                                                                                                                                                                                                                                                                                                                                                                                                                                                                                                                                                                                                                                                                                                                                                                                                                                                                                                                                                                                                                                                                                                                                                                                                                                                                                                                                                                                                                                                                                                                                                                                                                                                                                                                                                                                       | Class I      | Class II                             | CAS | Cont1      | Cont2   | Cont3    | DCM2     | MyoC2   | MyoC3    | VIP     | Fold_Change |             |
|----------|------------|---------------------------------------------------------------------------------------------------------------------------------------------------------------------------------------------------------------------------------------------------------------------------------------------------------------------------------------------------------------------------------------------------------------------------------------------------------------------------------------------------------------------------------------------------------------------------------------------------------------------------------------------------------------------------------------------------------------------------------------------------------------------------------------------------------------------------------------------------------------------------------------------------------------------------------------------------------------------------------------------------------------------------------------------------------------------------------------------------------------------------------------------------------------------------------------------------------------------------------------------------------------------------------------------------------------------------------------------------------------------------------------------------------------------------------------------------------------------------------------------------------------------------------------------------------------------------------------------------------------------------------------------------------------------------------------------------------------------------------------------------------------------------------------------------------------------------------------------------------------------------------------------------------------------------------------------------------------------------------------------------------------------------------------------------------------------------------------------------------------------------------------------------------------------------------------------------------------------------------------------------------------------------------------------------------------------------------------------------------------------------------------------------------------------------------------------------------------------------------------------------------------------------------------------------------------------------------------------------------------------------------------------------------------------------------------------------------------------------------------------------------------------------------------------------------------------------------------------------------------------------------------------------------------------------------------------------------------------------------------------------------------------------------------------------------------------------------------------------------------------------------------------------------------------------------------------------------------------------------------------------------------------------------------------------------------------------------------------------------------------------------------------------------------------------------------------------------------------------------------------------------------------------------------------------------------------------------------------------------------------------------------------------------------------------------------------------------------------------------------------------------------------------------------------------------------------------------------------------------------------------------------------------------------------------------------------------------------------------------------------------------------------------------------------------------------------------------------------------------------------------------------------------------------------------------------------------------------------------------------------------------------------------------------------------------------------------------------------------------------------------------------------------------------------------------------------------------------------------------------------------------------------------------------------------------------------------------------------------------------------------------------------------------------------------------------------------------------------------------------------------------------------------------------------------------------------------------------------------------------------------------------------------------------------------------------------------------------------------------------------------------------------------------------------------------------------------------------------------------------------------------------------------------------------------------------------------------------------------------------------------------------------------------------------------------------------------------------------------------------------------------------------------------------------------------------------------------------------------------------------------------------------------------------------------------------------------------------------------------------------------------------------------------------------------------------------------------------------------------------------------------------------------------------------------------------------------------------------------------------------------------------------------------------------------------------------------------------------------------------------------------------------------------------------------------------------------------------------------------------------------------------------------------------------------------------------------------------------------------------------------------------------------------------------------------------------------------------------------------------------------------------------------------------------------------------------------------------------------------------------------------------------------------------------------------------------------------------------------------------------------------------------------------------------------------------------------------------------------------------------------------------------------------------------------------------------------------------------------------------------------------------------------------------------------------------------------------------------------------------------------------------------------------------------------------------------------------------------------------------------------------------------------------------------------------------------------------------------------------------------------------------------------------------------------------------------------------------------------------------------------------------------------------------------------------------------------------------------------------------------------------------------------------------------------------------------------------------------------------------------------------------------------------------------------------------------------------------------------------------------------------------------------------------------------------------------------------------------------------------------------------------------------------------------------------------------------------------------------------------------------------------------------------------------------------------------------------------------------------------------------------------------------------------------------------------------------------------------------------------------------------------------------------------------------------------------------------------------------------------------------------------------------------------------------------------------------------------------------------------------------------------------------------------------------------------------------------------------------------------------------------------------------------------------------------------------------------------------------------------------------------------------------------------------------------------------------------------------------------------------------------------------------------------------------------------------------------------------------------------------------------------------------------------------------------------------------------------------------------------------------------------------------------------------------------------------------------------------------------------------------------------------------------------------------------------------------------|--------------|--------------------------------------|-----|------------|---------|----------|----------|---------|----------|---------|-------------|-------------|
| MEDN0097 | C8H8O3     | PhHydroxyphenyl Acetic Acid                                                                                                                                                                                                                                                                                                                                                                                                                                                                                                                                                                                                                                                                                                                                                                                                                                                                                                                                                                                                                                                                                                                                                                                                                                                                                                                                                                                                                                                                                                                                                                                                                                                                                                                                                                                                                                                                                                                                                                                                                                                                                                                                                                                                                                                                                                                                                                                                                                                                                                                                                                                                                                                                                                                                                                                                                                                                                                                                                                                                                                                                                                                                                                                                                                                                                                                                                                                                                                                                                                                                                                                                                                                                                                                                                                                                                                                                                                                                                                                                                                                                                                                                                                                                                                                                                                                                                                                                                                                                                                                                                                                                                                                                                                                                                                                                                                                                                                                                                                                                                                                                                                                                                                                                                                                                                                                                                                                                                                                                                                                                                                                                                                                                                                                                                                                                                                                                                                                                                                                                                                                                                                                                                                                                                                                                                                                                                                                                                                                                                                                                                                                                                                                                                                                                                                                                                                                                                                                                                                                                                                                                                                                                                                                                                                                                                                                                                                                                                                                                                                                                                                                                                                                                                                                                                                                                                                                                                                                                                                                                                                                                                                                                                                                                                                                                                                                                                                                                                                                                                                                                                                                                                                                                                                                                                                                                                                                                                                                                                                                                                                                                                                                                                                                                                                                                                                     | —            | Benzene acid substituted derivatives | —   | 156-38-7   | 92508   | 11740    | 8063.9   | 25454   | 9        | 9       | 1.076006671 | 0.226794963 |
| MEDN0105 | C26H45NO7S | Taurolithic acid                                                                                                                                                                                                                                                                                                                                                                                                                                                                                                                                                                                                                                                                                                                                                                                                                                                                                                                                                                                                                                                                                                                                                                                                                                                                                                                                                                                                                                                                                                                                                                                                                                                                                                                                                                                                                                                                                                                                                                                                                                                                                                                                                                                                                                                                                                                                                                                                                                                                                                                                                                                                                                                                                                                                                                                                                                                                                                                                                                                                                                                                                                                                                                                                                                                                                                                                                                                                                                                                                                                                                                                                                                                                                                                                                                                                                                                                                                                                                                                                                                                                                                                                                                                                                                                                                                                                                                                                                                                                                                                                                                                                                                                                                                                                                                                                                                                                                                                                                                                                                                                                                                                                                                                                                                                                                                                                                                                                                                                                                                                                                                                                                                                                                                                                                                                                                                                                                                                                                                                                                                                                                                                                                                                                                                                                                                                                                                                                                                                                                                                                                                                                                                                                                                                                                                                                                                                                                                                                                                                                                                                                                                                                                                                                                                                                                                                                                                                                                                                                                                                                                                                                                                                                                                                                                                                                                                                                                                                                                                                                                                                                                                                                                                                                                                                                                                                                                                                                                                                                                                                                                                                                                                                                                                                                                                                                                                                                                                                                                                                                                                                                                                                                                                                                                                                                                                                | —            | Bile acids                           | —   | 81-24-3    | 9       | 9        | 9        | 44992   | 17905    | 9       | 1.233334511 | 2296.518519 |
| MEDN0198 | C6H8O7     | Citric Acid                                                                                                                                                                                                                                                                                                                                                                                                                                                                                                                                                                                                                                                                                                                                                                                                                                                                                                                                                                                                                                                                                                                                                                                                                                                                                                                                                                                                                                                                                                                                                                                                                                                                                                                                                                                                                                                                                                                                                                                                                                                                                                                                                                                                                                                                                                                                                                                                                                                                                                                                                                                                                                                                                                                                                                                                                                                                                                                                                                                                                                                                                                                                                                                                                                                                                                                                                                                                                                                                                                                                                                                                                                                                                                                                                                                                                                                                                                                                                                                                                                                                                                                                                                                                                                                                                                                                                                                                                                                                                                                                                                                                                                                                                                                                                                                                                                                                                                                                                                                                                                                                                                                                                                                                                                                                                                                                                                                                                                                                                                                                                                                                                                                                                                                                                                                                                                                                                                                                                                                                                                                                                                                                                                                                                                                                                                                                                                                                                                                                                                                                                                                                                                                                                                                                                                                                                                                                                                                                                                                                                                                                                                                                                                                                                                                                                                                                                                                                                                                                                                                                                                                                                                                                                                                                                                                                                                                                                                                                                                                                                                                                                                                                                                                                                                                                                                                                                                                                                                                                                                                                                                                                                                                                                                                                                                                                                                                                                                                                                                                                                                                                                                                                                                                                                                                                                                                     | —            | Organic acid And Its derivatives     | —   | 77-92-9    | 1233800 | 424350   | 1011800  | 4186000 | 3564500  | 2649200 | 1.543660243 | 3.895091668 |
| MEDN0283 | C4H8O3     | 2-Hydroxybutanoic Acid                                                                                                                                                                                                                                                                                                                                                                                                                                                                                                                                                                                                                                                                                                                                                                                                                                                                                                                                                                                                                                                                                                                                                                                                                                                                                                                                                                                                                                                                                                                                                                                                                                                                                                                                                                                                                                                                                                                                                                                                                                                                                                                                                                                                                                                                                                                                                                                                                                                                                                                                                                                                                                                                                                                                                                                                                                                                                                                                                                                                                                                                                                                                                                                                                                                                                                                                                                                                                                                                                                                                                                                                                                                                                                                                                                                                                                                                                                                                                                                                                                                                                                                                                                                                                                                                                                                                                                                                                                                                                                                                                                                                                                                                                                                                                                                                                                                                                                                                                                                                                                                                                                                                                                                                                                                                                                                                                                                                                                                                                                                                                                                                                                                                                                                                                                                                                                                                                                                                                                                                                                                                                                                                                                                                                                                                                                                                                                                                                                                                                                                                                                                                                                                                                                                                                                                                                                                                                                                                                                                                                                                                                                                                                                                                                                                                                                                                                                                                                                                                                                                                                                                                                                                                                                                                                                                                                                                                                                                                                                                                                                                                                                                                                                                                                                                                                                                                                                                                                                                                                                                                                                                                                                                                                                                                                                                                                                                                                                                                                                                                                                                                                                                                                                                                                                                                                                          | 2-___        | Organic acid And Its derivatives     | —   | 600-15-7   | 78565   | 9        | 9        | 87829   | 165740   | 200490  | 1.256626396 | 5.775536694 |
| MEDN0334 | C8H8O3     | Mandelic Acid                                                                                                                                                                                                                                                                                                                                                                                                                                                                                                                                                                                                                                                                                                                                                                                                                                                                                                                                                                                                                                                                                                                                                                                                                                                                                                                                                                                                                                                                                                                                                                                                                                                                                                                                                                                                                                                                                                                                                                                                                                                                                                                                                                                                                                                                                                                                                                                                                                                                                                                                                                                                                                                                                                                                                                                                                                                                                                                                                                                                                                                                                                                                                                                                                                                                                                                                                                                                                                                                                                                                                                                                                                                                                                                                                                                                                                                                                                                                                                                                                                                                                                                                                                                                                                                                                                                                                                                                                                                                                                                                                                                                                                                                                                                                                                                                                                                                                                                                                                                                                                                                                                                                                                                                                                                                                                                                                                                                                                                                                                                                                                                                                                                                                                                                                                                                                                                                                                                                                                                                                                                                                                                                                                                                                                                                                                                                                                                                                                                                                                                                                                                                                                                                                                                                                                                                                                                                                                                                                                                                                                                                                                                                                                                                                                                                                                                                                                                                                                                                                                                                                                                                                                                                                                                                                                                                                                                                                                                                                                                                                                                                                                                                                                                                                                                                                                                                                                                                                                                                                                                                                                                                                                                                                                                                                                                                                                                                                                                                                                                                                                                                                                                                                                                                                                                                                                                   | —            | Organic acid And Its derivatives     | —   | 90-64-2    | 92509   | 11740    | 8063.9   | 25454   | 9        | 9       | 1.076006671 | 0.226794963 |
| MEDN0352 | C2H8NO4P   | O-Phosphorylethanolamine                                                                                                                                                                                                                                                                                                                                                                                                                                                                                                                                                                                                                                                                                                                                                                                                                                                                                                                                                                                                                                                                                                                                                                                                                                                                                                                                                                                                                                                                                                                                                                                                                                                                                                                                                                                                                                                                                                                                                                                                                                                                                                                                                                                                                                                                                                                                                                                                                                                                                                                                                                                                                                                                                                                                                                                                                                                                                                                                                                                                                                                                                                                                                                                                                                                                                                                                                                                                                                                                                                                                                                                                                                                                                                                                                                                                                                                                                                                                                                                                                                                                                                                                                                                                                                                                                                                                                                                                                                                                                                                                                                                                                                                                                                                                                                                                                                                                                                                                                                                                                                                                                                                                                                                                                                                                                                                                                                                                                                                                                                                                                                                                                                                                                                                                                                                                                                                                                                                                                                                                                                                                                                                                                                                                                                                                                                                                                                                                                                                                                                                                                                                                                                                                                                                                                                                                                                                                                                                                                                                                                                                                                                                                                                                                                                                                                                                                                                                                                                                                                                                                                                                                                                                                                                                                                                                                                                                                                                                                                                                                                                                                                                                                                                                                                                                                                                                                                                                                                                                                                                                                                                                                                                                                                                                                                                                                                                                                                                                                                                                                                                                                                                                                                                                                                                                                                                        | —            | GP                                   | —   | 1071-23-4  | 527990  | 307090   | 466430   | 2059500 | 664650   | 681400  | 1.26581867  | 2.61721782  |
| MEDN0356 | C28H44NO9P | Lysops 22:6                                                                                                                                                                                                                                                                                                                                                                                                                                                                                                                                                                                                                                                                                                                                                                                                                                                                                                                                                                                                                                                                                                                                                                                                                                                                                                                                                                                                                                                                                                                                                                                                                                                                                                                                                                                                                                                                                                                                                                                                                                                                                                                                                                                                                                                                                                                                                                                                                                                                                                                                                                                                                                                                                                                                                                                                                                                                                                                                                                                                                                                                                                                                                                                                                                                                                                                                                                                                                                                                                                                                                                                                                                                                                                                                                                                                                                                                                                                                                                                                                                                                                                                                                                                                                                                                                                                                                                                                                                                                                                                                                                                                                                                                                                                                                                                                                                                                                                                                                                                                                                                                                                                                                                                                                                                                                                                                                                                                                                                                                                                                                                                                                                                                                                                                                                                                                                                                                                                                                                                                                                                                                                                                                                                                                                                                                                                                                                                                                                                                                                                                                                                                                                                                                                                                                                                                                                                                                                                                                                                                                                                                                                                                                                                                                                                                                                                                                                                                                                                                                                                                                                                                                                                                                                                                                                                                                                                                                                                                                                                                                                                                                                                                                                                                                                                                                                                                                                                                                                                                                                                                                                                                                                                                                                                                                                                                                                                                                                                                                                                                                                                                                                                                                                                                                                                                                                                     | ___22:6      | GP                                   | —   | —          | 1654900 | 1485500  | 517810   | 213730  | 326790   | 698240  | 1.275622716 | 0.338624628 |
| MEDN0368 | C19H40NO7P | Lysope 14:0                                                                                                                                                                                                                                                                                                                                                                                                                                                                                                                                                                                                                                                                                                                                                                                                                                                                                                                                                                                                                                                                                                                                                                                                                                                                                                                                                                                                                                                                                                                                                                                                                                                                                                                                                                                                                                                                                                                                                                                                                                                                                                                                                                                                                                                                                                                                                                                                                                                                                                                                                                                                                                                                                                                                                                                                                                                                                                                                                                                                                                                                                                                                                                                                                                                                                                                                                                                                                                                                                                                                                                                                                                                                                                                                                                                                                                                                                                                                                                                                                                                                                                                                                                                                                                                                                                                                                                                                                                                                                                                                                                                                                                                                                                                                                                                                                                                                                                                                                                                                                                                                                                                                                                                                                                                                                                                                                                                                                                                                                                                                                                                                                                                                                                                                                                                                                                                                                                                                                                                                                                                                                                                                                                                                                                                                                                                                                                                                                                                                                                                                                                                                                                                                                                                                                                                                                                                                                                                                                                                                                                                                                                                                                                                                                                                                                                                                                                                                                                                                                                                                                                                                                                                                                                                                                                                                                                                                                                                                                                                                                                                                                                                                                                                                                                                                                                                                                                                                                                                                                                                                                                                                                                                                                                                                                                                                                                                                                                                                                                                                                                                                                                                                                                                                                                                                                                                     | ___14:0      | GP                                   | —   | —          | 6478.8  | 1894.3   | 1422     | 1181    | 473.9    | 851.64  | 1.22053116  | 0.255897336 |
| MEDN0391 | C22H32O2   | DHA [4Z,7Z,10Z,13Z,16Z,19Z-docosahexaenoic acid]                                                                                                                                                                                                                                                                                                                                                                                                                                                                                                                                                                                                                                                                                                                                                                                                                                                                                                                                                                                                                                                                                                                                                                                                                                                                                                                                                                                                                                                                                                                                                                                                                                                                                                                                                                                                                                                                                                                                                                                                                                                                                                                                                                                                                                                                                                                                                                                                                                                                                                                                                                                                                                                                                                                                                                                                                                                                                                                                                                                                                                                                                                                                                                                                                                                                                                                                                                                                                                                                                                                                                                                                                                                                                                                                                                                                                                                                                                                                                                                                                                                                                                                                                                                                                                                                                                                                                                                                                                                                                                                                                                                                                                                                                                                                                                                                                                                                                                                                                                                                                                                                                                                                                                                                                                                                                                                                                                                                                                                                                                                                                                                                                                                                                                                                                                                                                                                                                                                                                                                                                                                                                                                                                                                                                                                                                                                                                                                                                                                                                                                                                                                                                                                                                                                                                                                                                                                                                                                                                                                                                                                                                                                                                                                                                                                                                                                                                                                                                                                                                                                                                                                                                                                                                                                                                                                                                                                                                                                                                                                                                                                                                                                                                                                                                                                                                                                                                                                                                                                                                                                                                                                                                                                                                                                                                                                                                                                                                                                                                                                                                                                                                                                                                                                                                                                                                | —            | Oxidized lipids                      | —   | 6217-54-5  | 6214400 | 7798900  | 3177000  | 2304900 | 2045800  | 2520800 | 1.433873493 | 0.399710317 |
| MEDN0394 | C20H36O2   | Cis-11,14-Eicosadienoic Acid(C20:2)                                                                                                                                                                                                                                                                                                                                                                                                                                                                                                                                                                                                                                                                                                                                                                                                                                                                                                                                                                                                                                                                                                                                                                                                                                                                                                                                                                                                                                                                                                                                                                                                                                                                                                                                                                                                                                                                                                                                                                                                                                                                                                                                                                                                                                                                                                                                                                                                                                                                                                                                                                                                                                                                                                                                                                                                                                                                                                                                                                                                                                                                                                                                                                                                                                                                                                                                                                                                                                                                                                                                                                                                                                                                                                                                                                                                                                                                                                                                                                                                                                                                                                                                                                                                                                                                                                                                                                                                                                                                                                                                                                                                                                                                                                                                                                                                                                                                                                                                                                                                                                                                                                                                                                                                                                                                                                                                                                                                                                                                                                                                                                                                                                                                                                                                                                                                                                                                                                                                                                                                                                                                                                                                                                                                                                                                                                                                                                                                                                                                                                                                                                                                                                                                                                                                                                                                                                                                                                                                                                                                                                                                                                                                                                                                                                                                                                                                                                                                                                                                                                                                                                                                                                                                                                                                                                                                                                                                                                                                                                                                                                                                                                                                                                                                                                                                                                                                                                                                                                                                                                                                                                                                                                                                                                                                                                                                                                                                                                                                                                                                                                                                                                                                                                                                                                                                                             | ___11,14-___ | FA                                   | —   | 2091-39-6  | 13514   | 14982    | 5146.9   | 7996.3  | 3254.3   | 2892.1  | 1.124902528 | 4.420376959 |
| MEDN0396 | C10H20O2   | Capric Acid(C10:0)                                                                                                                                                                                                                                                                                                                                                                                                                                                                                                                                                                                                                                                                                                                                                                                                                                                                                                                                                                                                                                                                                                                                                                                                                                                                                                                                                                                                                                                                                                                                                                                                                                                                                                                                                                                                                                                                                                                                                                                                                                                                                                                                                                                                                                                                                                                                                                                                                                                                                                                                                                                                                                                                                                                                                                                                                                                                                                                                                                                                                                                                                                                                                                                                                                                                                                                                                                                                                                                                                                                                                                                                                                                                                                                                                                                                                                                                                                                                                                                                                                                                                                                                                                                                                                                                                                                                                                                                                                                                                                                                                                                                                                                                                                                                                                                                                                                                                                                                                                                                                                                                                                                                                                                                                                                                                                                                                                                                                                                                                                                                                                                                                                                                                                                                                                                                                                                                                                                                                                                                                                                                                                                                                                                                                                                                                                                                                                                                                                                                                                                                                                                                                                                                                                                                                                                                                                                                                                                                                                                                                                                                                                                                                                                                                                                                                                                                                                                                                                                                                                                                                                                                                                                                                                                                                                                                                                                                                                                                                                                                                                                                                                                                                                                                                                                                                                                                                                                                                                                                                                                                                                                                                                                                                                                                                                                                                                                                                                                                                                                                                                                                                                                                                                                                                                                                                                              | —            | FA                                   | —   | 334-48-5   | 2318.4  | 2231.5   | 1831.9   | 2132.3  | 5075.3   | 5727.1  | 1.111892016 | 2.026810618 |
| MEDN0399 | C20H40O2   | Arachidic Acid(C20:0)                                                                                                                                                                                                                                                                                                                                                                                                                                                                                                                                                                                                                                                                                                                                                                                                                                                                                                                                                                                                                                                                                                                                                                                                                                                                                                                                                                                                                                                                                                                                                                                                                                                                                                                                                                                                                                                                                                                                                                                                                                                                                                                                                                                                                                                                                                                                                                                                                                                                                                                                                                                                                                                                                                                                                                                                                                                                                                                                                                                                                                                                                                                                                                                                                                                                                                                                                                                                                                                                                                                                                                                                                                                                                                                                                                                                                                                                                                                                                                                                                                                                                                                                                                                                                                                                                                                                                                                                                                                                                                                                                                                                                                                                                                                                                                                                                                                                                                                                                                                                                                                                                                                                                                                                                                                                                                                                                                                                                                                                                                                                                                                                                                                                                                                                                                                                                                                                                                                                                                                                                                                                                                                                                                                                                                                                                                                                                                                                                                                                                                                                                                                                                                                                                                                                                                                                                                                                                                                                                                                                                                                                                                                                                                                                                                                                                                                                                                                                                                                                                                                                                                                                                                                                                                                                                                                                                                                                                                                                                                                                                                                                                                                                                                                                                                                                                                                                                                                                                                                                                                                                                                                                                                                                                                                                                                                                                                                                                                                                                                                                                                                                                                                                                                                                                                                                                                           | —            | FA                                   | —   | 506-30-9   | 4699.8  | 2039.6   | 3110.9   | 21941   | 30077    | 35811   | 1.624858438 | 8.916378181 |
| MEDN0502 | C5H11O7P   | 2-Deoxyribose 1-Phosphate                                                                                                                                                                                                                                                                                                                                                                                                                                                                                                                                                                                                                                                                                                                                                                                                                                                                                                                                                                                                                                                                                                                                                                                                                                                                                                                                                                                                                                                                                                                                                                                                                                                                                                                                                                                                                                                                                                                                                                                                                                                                                                                                                                                                                                                                                                                                                                                                                                                                                                                                                                                                                                                                                                                                                                                                                                                                                                                                                                                                                                                                                                                                                                                                                                                                                                                                                                                                                                                                                                                                                                                                                                                                                                                                                                                                                                                                                                                                                                                                                                                                                                                                                                                                                                                                                                                                                                                                                                                                                                                                                                                                                                                                                                                                                                                                                                                                                                                                                                                                                                                                                                                                                                                                                                                                                                                                                                                                                                                                                                                                                                                                                                                                                                                                                                                                                                                                                                                                                                                                                                                                                                                                                                                                                                                                                                                                                                                                                                                                                                                                                                                                                                                                                                                                                                                                                                                                                                                                                                                                                                                                                                                                                                                                                                                                                                                                                                                                                                                                                                                                                                                                                                                                                                                                                                                                                                                                                                                                                                                                                                                                                                                                                                                                                                                                                                                                                                                                                                                                                                                                                                                                                                                                                                                                                                                                                                                                                                                                                                                                                                                                                                                                                                                                                                                                                                       | 2-___1-___   | Carboxylic acids and derivatives     | —   | 17210-42-3 | 1032600 | 500660   | 826840   | 145430  | 659280   | 334770  | 1.118569386 | 0.48281005  |
| MEDN0506 | C8H16NO9P  | N-Acetylglucosamine 1-Phosphate                                                                                                                                                                                                                                                                                                                                                                                                                                                                                                                                                                                                                                                                                                                                                                                                                                                                                                                                                                                                                                                                                                                                                                                                                                                                                                                                                                                                                                                                                                                                                                                                                                                                                                                                                                                                                                                                                                                                                                                                                                                                                                                                                                                                                                                                                                                                                                                                                                                                                                                                                                                                                                                                                                                                                                                                                                                                                                                                                                                                                                                                                                                                                                                                                                                                                                                                                                                                                                                                                                                                                                                                                                                                                                                                                                                                                                                                                                                                                                                                                                                                                                                                                                                                                                                                                                                                                                                                                                                                                                                                                                                                                                                                                                                                                                                                                                                                                                                                                                                                                                                                                                                                                                                                                                                                                                                                                                                                                                                                                                                                                                                                                                                                                                                                                                                                                                                                                                                                                                                                                                                                                                                                                                                                                                                                                                                                                                                                                                                                                                                                                                                                                                                                                                                                                                                                                                                                                                                                                                                                                                                                                                                                                                                                                                                                                                                                                                                                                                                                                                                                                                                                                                                                                                                                                                                                                                                                                                                                                                                                                                                                                                                                                                                                                                                                                                                                                                                                                                                                                                                                                                                                                                                                                                                                                                                                                                                                                                                                                                                                                                                                                                                                                                                                                                                                                                 | N-___1-___   | Carboxylic acids and derivatives     | —   | 6866-69-9  | 205130  | 92674    | 89775    | 1213900 | 315830   | 174580  | 1.225980695 | 4.397322868 |
| MEDN0561 | C11H16N2O8 | N-Acetylaspartylglutamic acid                                                                                                                                                                                                                                                                                                                                                                                                                                                                                                                                                                                                                                                                                                                                                                                                                                                                                                                                                                                                                                                                                                                                                                                                                                                                                                                                                                                                                                                                                                                                                                                                                                                                                                                                                                                                                                                                                                                                                                                                                                                                                                                                                                                                                                                                                                                                                                                                                                                                                                                                                                                                                                                                                                                                                                                                                                                                                                                                                                                                                                                                                                                                                                                                                                                                                                                                                                                                                                                                                                                                                                                                                                                                                                                                                                                                                                                                                                                                                                                                                                                                                                                                                                                                                                                                                                                                                                                                                                                                                                                                                                                                                                                                                                                                                                                                                                                                                                                                                                                                                                                                                                                                                                                                                                                                                                                                                                                                                                                                                                                                                                                                                                                                                                                                                                                                                                                                                                                                                                                                                                                                                                                                                                                                                                                                                                                                                                                                                                                                                                                                                                                                                                                                                                                                                                                                                                                                                                                                                                                                                                                                                                                                                                                                                                                                                                                                                                                                                                                                                                                                                                                                                                                                                                                                                                                                                                                                                                                                                                                                                                                                                                                                                                                                                                                                                                                                                                                                                                                                                                                                                                                                                                                                                                                                                                                                                                                                                                                                                                                                                                                                                                                                                                                                                                                                                                   | N-___        | Amino acid and Its metabolomics      | —   | 3106-85-2  | 36137   | 18086    | 19707    | 123780  | 142340   | 115130  | 1.628388015 | 5.156905181 |
| MEDN0593 | C4H6O5     | D-Malic acid                                                                                                                                                                                                                                                                                                                                                                                                                                                                                                                                                                                                                                                                                                                                                                                                                                                                                                                                                                                                                                                                                                                                                                                                                                                                                                                                                                                                                                                                                                                                                                                                                                                                                                                                                                                                                                                                                                                                                                                                                                                                                                                                                                                                                                                                                                                                                                                                                                                                                                                                                                                                                                                                                                                                                                                                                                                                                                                                                                                                                                                                                                                                                                                                                                                                                                                                                                                                                                                                                                                                                                                                                                                                                                                                                                                                                                                                                                                                                                                                                                                                                                                                                                                                                                                                                                                                                                                                                                                                                                                                                                                                                                                                                                                                                                                                                                                                                                                                                                                                                                                                                                                                                                                                                                                                                                                                                                                                                                                                                                                                                                                                                                                                                                                                                                                                                                                                                                                                                                                                                                                                                                                                                                                                                                                                                                                                                                                                                                                                                                                                                                                                                                                                                                                                                                                                                                                                                                                                                                                                                                                                                                                                                                                                                                                                                                                                                                                                                                                                                                                                                                                                                                                                                                                                                                                                                                                                                                                                                                                                                                                                                                                                                                                                                                                                                                                                                                                                                                                                                                                                                                                                                                                                                                                                                                                                                                                                                                                                                                                                                                                                                                                                                                                                                                                                                                                    | D-(+)-___    | Organic acid And Its derivatives     | —   | 636-61-3   | 3268900 | 12392000 | 18235000 | 5988400 | 11896000 | 9542000 | 1.249540109 | 0.433359656 |
| MEDN0598 | C16H30O4   | Hexadecanedioic acid                                                                                                                                                                                                                                                                                                                                                                                                                                                                                                                                                                                                                                                                                                                                                                                                                                                                                                                                                                                                                                                                                                                                                                                                                                                                                                                                                                                                                                                                                                                                                                                                                                                                                                                                                                                                                                                                                                                                                                                                                                                                                                                                                                                                                                                                                                                                                                                                                                                                                                                                                                                                                                                                                                                                                                                                                                                                                                                                                                                                                                                                                                                                                                                                                                                                                                                                                                                                                                                                                                                                                                                                                                                                                                                                                                                                                                                                                                                                                                                                                                                                                                                                                                                                                                                                                                                                                                                                                                                                                                                                                                                                                                                                                                                                                                                                                                                                                                                                                                                                                                                                                                                                                                                                                                                                                                                                                                                                                                                                                                                                                                                                                                                                                                                                                                                                                                                                                                                                                                                                                                                                                                                                                                                                                                                                                                                                                                                                                                                                                                                                                                                                                                                                                                                                                                                                                                                                                                                                                                                                                                                                                                                                                                                                                                                                                                                                                                                                                                                                                                                                                                                                                                                                                                                                                                                                                                                                                                                                                                                                                                                                                                                                                                                                                                                                                                                                                                                                                                                                                                                                                                                                                                                                                                                                                                                                                                                                                                                                                                                                                                                                                                                                                                                                                                                                                                            | —            | FA                                   | —   | 505-54-4   | 14519   | 17686    | 24184    | 33283   | 45113    | 39464   | 1.511755496 | 2.09012396  |
| MEDN0700 | C20H34O5   | 5-IPF2_11 [8,11,13,15,17,19,21,23,25,27,29,31,33,35,37,39,41,43,45,47,49,51,53,55,57,59,61,63,65,67,69,71,73,75,77,79,81,83,85,87,89,91,93,95,97,99,101,103,105,107,109,111,113,115,117,119,121,123,125,127,129,131,133,135,137,139,141,143,145,147,149,151,153,155,157,159,161,163,165,167,169,171,173,175,177,179,181,183,185,187,189,191,193,195,197,199,201,203,205,207,209,211,213,215,217,219,221,223,225,227,229,231,233,235,237,239,241,243,245,247,249,251,253,255,257,259,261,263,265,267,269,271,273,275,277,279,281,283,285,287,289,291,293,295,297,299,301,303,305,307,309,311,313,315,317,319,321,323,325,327,329,331,333,335,337,339,341,343,345,347,349,351,353,355,357,359,361,363,365,367,369,371,373,375,377,379,381,383,385,387,389,391,393,395,397,399,401,403,405,407,409,411,413,415,417,419,421,423,425,427,429,431,433,435,437,439,441,443,445,447,449,451,453,455,457,459,461,463,465,467,469,471,473,475,477,479,481,483,485,487,489,491,493,495,497,499,501,503,505,507,509,511,513,515,517,519,521,523,525,527,529,531,533,535,537,539,541,543,545,547,549,551,553,555,557,559,561,563,565,567,569,571,573,575,577,579,581,583,585,587,589,591,593,595,597,599,601,603,605,607,609,611,613,615,617,619,621,623,625,627,629,631,633,635,637,639,641,643,645,647,649,651,653,655,657,659,661,663,665,667,669,671,673,675,677,679,681,683,685,687,689,691,693,695,697,699,701,703,705,707,709,711,713,715,717,719,721,723,725,727,729,731,733,735,737,739,741,743,745,747,749,751,753,755,757,759,761,763,765,767,769,771,773,775,777,779,781,783,785,787,789,791,793,795,797,799,801,803,805,807,809,811,813,815,817,819,821,823,825,827,829,831,833,835,837,839,841,843,845,847,849,851,853,855,857,859,861,863,865,867,869,871,873,875,877,879,881,883,885,887,889,891,893,895,897,899,901,903,905,907,909,911,913,915,917,919,921,923,925,927,929,931,933,935,937,939,941,943,945,947,949,951,953,955,957,959,961,963,965,967,969,971,973,975,977,979,981,983,985,987,989,991,993,995,997,999,1001,1003,1005,1007,1009,1011,1013,1015,1017,1019,1021,1023,1025,1027,1029,1031,1033,1035,1037,1039,1041,1043,1045,1047,1049,1051,1053,1055,1057,1059,1061,1063,1065,1067,1069,1071,1073,1075,1077,1079,1081,1083,1085,1087,1089,1091,1093,1095,1097,1099,1101,1103,1105,1107,1109,1111,1113,1115,1117,1119,1121,1123,1125,1127,1129,1131,1133,1135,1137,1139,1141,1143,1145,1147,1149,1151,1153,1155,1157,1159,1161,1163,1165,1167,1169,1171,1173,1175,1177,1179,1181,1183,1185,1187,1189,1191,1193,1195,1197,1199,1201,1203,1205,1207,1209,1211,1213,1215,1217,1219,1221,1223,1225,1227,1229,1231,1233,1235,1237,1239,1241,1243,1245,1247,1249,1251,1253,1255,1257,1259,1261,1263,1265,1267,1269,1271,1273,1275,1277,1279,1281,1283,1285,1287,1289,1291,1293,1295,1297,1299,1301,1303,1305,1307,1309,1311,1313,1315,1317,1319,1321,1323,1325,1327,1329,1331,1333,1335,1337,1339,1341,1343,1345,1347,1349,1351,1353,1355,1357,1359,1361,1363,1365,1367,1369,1371,1373,1375,1377,1379,1381,1383,1385,1387,1389,1391,1393,1395,1397,1399,1401,1403,1405,1407,1409,1411,1413,1415,1417,1419,1421,1423,1425,1427,1429,1431,1433,1435,1437,1439,1441,1443,1445,1447,1449,1451,1453,1455,1457,1459,1461,1463,1465,1467,1469,1471,1473,1475,1477,1479,1481,1483,1485,1487,1489,1491,1493,1495,1497,1499,1501,1503,1505,1507,1509,1511,1513,1515,1517,1519,1521,1523,1525,1527,1529,1531,1533,1535,1537,1539,1541,1543,1545,1547,1549,1551,1553,1555,1557,1559,1561,1563,1565,1567,1569,1571,1573,1575,1577,1579,1581,1583,1585,1587,1589,1591,1593,1595,1597,1599,1601,1603,1605,1607,1609,1611,1613,1615,1617,1619,1621,1623,1625,1627,1629,1631,1633,1635,1637,1639,1641,1643,1645,1647,1649,1651,1653,1655,1657,1659,1661,1663,1665,1667,1669,1671,1673,1675,1677,1679,1681,1683,1685,1687,1689,1691,1693,1695,1697,1699,1701,1703,1705,1707,1709,1711,1713,1715,1717,1719,1721,1723,1725,1727,1729,1731,1733,1735,1737,1739,1741,1743,1745,1747,1749,1751,1753,1755,1757,1759,1761,1763,1765,1767,1769,1771,1773,1775,1777,1779,1781,1783,1785,1787,1789,1791,1793,1795,1797,1799,1801,1803,1805,1807,1809,1811,1813,1815,1817,1819,1821,1823,1825,1827,1829,1831,1833,1835,1837,1839,1841,1843,1845,1847,1849,1851,1853,1855,1857,1859,1861,1863,1865,1867,1869,1871,1873,1875,1877,1879,1881,1883,1885,1887,1889,1891,1893,1895,1897,1899,1901,1903,1905,1907,1909,1911,1913,1915,1917,1919,1921,1923,1925,1927,1929,1931,1933,1935,1937,1939,1941,1943,1945,1947,1949,1951,1953,1955,1957,1959,1961,1963,1965,1967,1969,1971,1973,1975,1977,1979,1981,1983,1985,1987,1989,1991,1993,1995,1997,1999,2001,2003,2005,2007,2009,2011,2013,2015,2017,2019,2021,2023,2025,2027,2029,2031,2033,2035,2037,2039,2041,2043,2045,2047,2049,2051,2053,2055,2057,2059,2061,2063,2065,2067,2069,2071,2073,2075,2077,2079,2081,2083,2085,2087,2089,2091,2093,2095,2097,2099,2101,2103,2105,2107,2109,2111,2113,2115,2117,2119,2121,2123,2125,2127,2129,2131,2133,2135,2137,2139,2141,2143,2145,2147,2149,2151,2153,2155,2157,2159,2161,2163,2165,2167,2169,2171,2173,2175,2177,2179,2181,2183,2185,2187,2189,2191,2193,2195,2197,2199,2201,2203,2205,2207,2209,2211,2213,2215,2217,2219,2221,2223,2225,2227,2229,2231,2233,2235,2237,2239,2241,2243,2245,2247,2249,2251,2253,2255,2257,2259,2261,2263,2265,2267,2269,2271,2273,2275,2277,2279,2281,2283,2285,2287,2289,2291,2293,2295,2297,2299,2301,2303,2305,2307,2309,2311,2313,2315,2317,2319,2321,2323,2325,2327,2329,2331,2333,2335,2337,2339,2341,2343,2345,2347,2349,2351,2353,2355,2357,2359,2361,2363,2365,2367,2369,2371,2373,2375,2377,2379,2381,2383,2385,2387,2389,2391,2393,2395,2397,2399,2401,2403,2405,2407,2409,2411,2413,2415,2417,2419,2421,2423,2425,2427,2429,2431,2433,2435,2437,2439,2441,2443,2445,2447,2449,2451,2453,2455,2457,2459,2461,2463,2465,2467,2469,2471,2473,2475,2477,2479,2481,2483,2485,2487,2489,2491,2493,2495,2497,2499,2501,2503,2505,2507,2509,2511,2513,2515,2517,2519,2521,2523,2525,2527,2529,2531,2533,2535,2537,2539,2541,2543,2545,2547,2549,2551,2553,2555,2557,2559,2561,2563,2565,2567,2569,2571,2573,2575,2577,2579,2581,2583,2585,2587,2589,2591,2593,2595,2597,2599,2601,2603,2605,2607,2609,2611,2613,2615,2617,2619,2621,2623,2625,2627,2629,2631,2633,2635,2637,2639,2641,2643,2645,2647,2649,2651,2653,2655,2657,2659,2661,2663,2665,2667,2669,2671,2673,2675,2677,2679,2681,2683,2685,2687,2689,2691,2693,2695,2697,2699,2701,2703,2705,2707,2709,2711,2713,2715,2717,2719,2721,2723,2725,2727,2729,2731,2733,2735,2737,2739,2741,2743,2745,2747,2749,2751,2753,2755,2757,2759,2761,2763,2765,2767,2769,2771,2773,2775,2777,2779,2781,2783,2785,2787,2789,2791,2793,2795,2797,2799,2801,2803,2805,2807,2809,2811,2813,2815,2817,2819,2821,2823,2825,2827,2829,2831,2833,2835,2837,2839,2841,2843,2845,2847,2849,2851,2853,2855,2857,2859,2861,2863,2865,2867,2869,2871,2873,2875,2877,2879,2881,2883,2885,2887,2889,2891,2893,2895,2897,2899,2901,2903,2905,2907,2909,2911,2913,2915,2917,2919,2921,2923,2925,2927,2929,2931,2933,2935,2937,2939,2941,2943,2945,2947,2949,2951,2953,2955,2957,2959,2961,2963,2965,2967,2969,2971,2973,2975,2977,2979,2981,2983,2985,2987,2989,2991,2993,2995,2997,2999,3001,3003,3005,3007,3009,3011,3013,3015,3017,3019,3021,3023,3025,3027,3029,3031,3033,3035,3037,3039,3041,3043,3045,3047,3049,3051,3053,3055,3057,3059,3061,3063,3065,3067,3069,3071,3073,3075,3077,3079,3081,3083,3085,3087,3089,3091,3093,3095,3097,3099,3101,3103,3105,3107,3109,3111,3113,3115,3117,3119,3121,3123,3125,3127,3129,3131,3133,3135,3137,3139,3141,3143,3145,3147,3149,3151,3153,3155,3157,3159,3161,3163,3165,3167,3169,3171,3173,3175,3177,3179,3181,3183,3185,3187,3189,3191,3193,3195,3197,3199,3201,3203,3205,3207,3209,3211,3213,3215,3217,3219,3221,3223,3225,3227,3229,3231,3233,3235,3237,3239,3241,3243,3245,3247,3249,3251,3253,3255,3257,3259,3261,3263,3265,3267,3269,3271,3273,3275,3277,3279,3281,3283,3285,3287,3289,3291,3293,3295,3297,3299,3301,3303,3305,3307,3309,3311,3313,3315,3317,3319,3321,3323,3325,3327,3329,3331,3333,3335,3337,3339,3341,3343,3345,3347,3349,3351,3353,3355,3357,3359,3361,3363,3365,3367,3369,3371,3373,3375,3377,3379,3381,3383,3385,3387,3389,3391,3393,3395,3397,3399,3401,3403,3405,3407,3409,3411,3413,3415,3417,3419,3421,3423,3425,3427,3429,3431,3433,3435,3437,3439,3441,3443,3445,3447,3449,3451,3453,3455,3457,3459,3461,3463,3465,3467,3469,3471,3473,3475,3477,3479,3481,3483,3485,3487,3489,3491,3493,3495,3497,3499,3501,3503,3505,3507,3509,3511,3513,3515,3517,3519,3521,3523,3525,3527,3529,3531,3533,3535,3537,3539,3541,3543,3545,3547,3549,3551,3553,3555,3557,3559,3561,3563,3565,3567,3569,3571,3573,3575,3577,3579,3581,3583,3585,3587,3589,3591,3593,3595,3597,3599,3601,3603,3605,3607,3609,3611,3613,3615,3617,3619,3621,3623,3625,3627,3629,3631,3633,3635,3637,3639,3641,3643,3645,3647,3649,3651,3653,3655,3657,3659,3661,3663,3665,3667,3669,3671,3673,3675,3677,3679,3681,3683,3685,3687,3689,3691,3693,3695,3697,3699,3701,3703,3705,3707,3709,3711,3713,3715,3717,3719,3721,3723,3725,3727,3729,3731,3733,3735,3737,3739,3741,3743,3745,3747,3749,3751,3753,3755,3757,3759,3761,3763,3765,3767,3769,3771,3773,3775,3777,3779,3781,3783,3785,3787,3789,3791,3793,3795,3797,3799,3801,3803,3 |              |                                      |     |            |         |          |          |         |          |         |             |             |







| Log2FC       | Type | hmdb_ID     | primary SMPDB_ID                                                                                                                                                                        |
|--------------|------|-------------|-----------------------------------------------------------------------------------------------------------------------------------------------------------------------------------------|
| -2.140539496 | down | HMDB0000020 | SMP0000006;SMP0000169;SMP0000180;SMP0000218;SMP0000429;SMP0000484;SMP0000498;SMP0000533                                                                                                 |
| 11.1652327   | up   | HMDB0000036 | SMP0000035;SMP0000314;SMP0000318;SMP0000317;SMP0000316;SMP0000315;SMP0000720                                                                                                            |
| 1.961657282  | up   | HMDB0000094 | SMP0000057;SMP0000466;SMP0000546;SMP0000547;SMP0000548;SMP0000549;SMP0000550;SMP0000551;SMP0000654;SMP0002231;SMP0002292;SMP0002295;SMP0002298;SMP0002358;SMP0002359;SMP00083           |
| 2.529955016  | up   | HMDB0000008 | SMP0000016;SMP0000198;SMP0000201;SMP0000502                                                                                                                                             |
| -2.140539496 | down | HMDB0000703 | --                                                                                                                                                                                      |
| 1.388039999  | up   | HMDB0000224 | SMP0000034;SMP0000349;SMP0000348;SMP0000347;SMP0000525;SMP0000526;SMP0000649;SMP0014212;SMP0029731                                                                                      |
| -1.562241192 | down | --          | --                                                                                                                                                                                      |
| -1.965262964 | down | --          | --                                                                                                                                                                                      |
| -1.322973284 | down | HMDB0002183 | SMP0000018                                                                                                                                                                              |
| -1.250244497 | down | HMDB0000500 | --                                                                                                                                                                                      |
| 1.019211292  | up   | HMDB0000511 | SMP0000456                                                                                                                                                                              |
| 3.156457809  | up   | HMDB0002212 | --                                                                                                                                                                                      |
| -1.050472387 | down | HMDB0001351 | SMP0000050;SMP0000031;SMP0000144;SMP0000167;SMP0000365;SMP0000364;SMP0000203;SMP0000220;SMP0000210;SMP0000168;SMP0000046;SMP0000172;SMP0000219;SMP0000178;SMP0000202;SMP0000            |
| 2.136625465  | up   | HMDB0001367 | SMP0000045;SMP0000216;SMP0000240;SMP0000390;SMP0000534                                                                                                                                  |
| 2.366505519  | up   | HMDB0001067 | --                                                                                                                                                                                      |
| -1.206363243 | down | HMDB0001518 | --                                                                                                                                                                                      |
| 1.053586508  | up   | HMDB0000672 | --                                                                                                                                                                                      |
| 12.13852767  | up   | --          | --                                                                                                                                                                                      |
| 11.01291418  | up   | --          | --                                                                                                                                                                                      |
| 2.229115163  | up   | --          | --                                                                                                                                                                                      |
| -11.0632952  | down | --          | --                                                                                                                                                                                      |
| -2.040870722 | down | --          | --                                                                                                                                                                                      |
| -1.330490962 | down | --          | --                                                                                                                                                                                      |
| 2.696501975  | up   | --          | --                                                                                                                                                                                      |
| -1.322973284 | down | --          | --                                                                                                                                                                                      |
| -2.400446589 | down | HMDB0001975 | --                                                                                                                                                                                      |
| -4.822273627 | down | --          | --                                                                                                                                                                                      |
| 1.251656739  | up   | HMDB0001057 | --                                                                                                                                                                                      |
| -1.237231707 | down | --          | --                                                                                                                                                                                      |
| -1.670199535 | down | --          | --                                                                                                                                                                                      |
| -1.670199535 | down | --          | --                                                                                                                                                                                      |
| -1.670199535 | down | --          | --                                                                                                                                                                                      |
| -1.670199535 | down | --          | --                                                                                                                                                                                      |
| -2.725640265 | down | --          | --                                                                                                                                                                                      |
| -2.725640265 | down | --          | --                                                                                                                                                                                      |
| -2.513737684 | down | --          | --                                                                                                                                                                                      |
| -3.629404396 | down | --          | --                                                                                                                                                                                      |
| -3.629404396 | down | --          | --                                                                                                                                                                                      |
| 1.157576375  | up   | HMDB0000517 | SMP0000067;SMP0000020;SMP0000207;SMP0000362;SMP0000360;SMP0000361;SMP0000208;SMP0000188;SMP0000363;SMP0000175;SMP0000192;SMP0000004;SMP0000059;SMP0000357;SMP0000003;SMP0000            |
| 1.181726646  | up   | HMDB0000043 | SMP0000123;SMP0000033;SMP0000031;SMP0000314;SMP0000317;SMP0000316;SMP0000222;SMP0000340;SMP0000221;SMP0000004;SMP0000242;SMP0000179;SMP0000244;SMP0000223;SMP0000484;SMP0000485;SMP0000 |
| -1.313913655 | down | HMDB0000725 | SMP0000020;SMP0000207;SMP0000362;SMP0000360;SMP0000361;SMP0000208;SMP0000188;SMP0000363;SMP0000050;SMP0000505;SMP0000506;SMP0000507;SMP00002292;SMP00002295                             |
| 1.218657101  | up   | HMDB0001414 | SMP0000445;SMP0000033;SMP0000177;SMP0000341;SMP0000214;SMP0000222;SMP0000340;SMP0000221;SMP00000570                                                                                     |
| 3.659882808  | up   | HMDB0000403 | --                                                                                                                                                                                      |
| 1.863712932  | up   | HMDB0000068 | SMP0000012;SMP0000169;SMP0000006;SMP0000190;SMP0000218;SMP0000429;SMP0000494;SMP0000497;SMP0000498;SMP0000053;SMP0000661                                                                |
| 2.033569336  | up   | HMDB0000763 | SMP0000063                                                                                                                                                                              |
| 2.186124017  | up   | HMDB0000681 | --                                                                                                                                                                                      |
| -1.734166738 | down | HMDB0010379 | SMP0000075;SMP0000353;SMP0000077;SMP0000083;SMP0000084;SMP0000085;SMP0000086;SMP0000087;SMP0000093;SMP0000094;SMP0000096;SMP0000098;SMP0000101;SMP0000102;SMP0000104;SMP0000            |
| -1.960962573 | down | HMDB0010383 | --                                                                                                                                                                                      |
| -1.721617559 | down | HMDB0010385 | --                                                                                                                                                                                      |
| -2.337902118 | down | HMDB0010386 | --                                                                                                                                                                                      |
| -1.834549529 | down | HMDB0010391 | --                                                                                                                                                                                      |
| -2.471281039 | down | HMDB0010392 | --                                                                                                                                                                                      |
| 1.408798963  | up   | HMDB0000532 | --                                                                                                                                                                                      |
| 2.52551397   | up   | HMDB0006216 | SMP0000074;SMP0000336                                                                                                                                                                   |
| -2.419871118 | down | HMDB0000066 | SMP0000074;SMP0000336                                                                                                                                                                   |
| -2.337902118 | down | --          | --                                                                                                                                                                                      |
| -1.823610626 | down | HMDB0000235 | SMP0000076                                                                                                                                                                              |
| 10.48854685  | up   | HMDB0001186 | --                                                                                                                                                                                      |
| 20.73363182  | up   | --          | --                                                                                                                                                                                      |
| -1.101199151 | down | HMDB0002660 | --                                                                                                                                                                                      |
| 1.123726213  | up   | HMDB0000157 | --                                                                                                                                                                                      |
| -1.326180608 | down | HMDB0000453 | --                                                                                                                                                                                      |
| -1.07528858  | down | HMDB0000895 | SMP0000025;SMP0000225;SMP0000226;SMP0000227;SMP0000228;SMP0000229;SMP0000230;SMP0000231;SMP0000232;SMP0000233;SMP0000248;SMP0000589;SMP0000734;SMP0000735;SMP0000736;SMP00051           |
| -14.18010772 | down | --          | --                                                                                                                                                                                      |
| -1.204042961 | down | --          | --                                                                                                                                                                                      |
| -1.66229786  | down | --          | --                                                                                                                                                                                      |
| -1.912411146 | down | HMDB0000138 | SMP0000035;SMP0000314;SMP0000318;SMP0000317;SMP0000316;SMP0000315;SMP0000720                                                                                                            |
| 10.85890221  | up   | HMDB0000037 | SMP0000130;SMP0000483;SMP0000373;SMP0000371;SMP0000372;SMP0000184;SMP0000189;SMP0000193;SMP0000197;SMP0000145;SMP0000146;SMP0000147;SMP0000148;SMP0000149;SMP0000150;SMP0000            |
| 1.90234245   | up   | HMDB0000376 | SMP0000075;SMP0000353;SMP0000077;SMP0000083;SMP0000084;SMP0000085;SMP0000086;SMP0000087;SMP0000093;SMP0000094;SMP0000096;SMP0000098;SMP0000101;SMP0000102;SMP0000104;SMP0000            |
| -1.07528858  | down | --          | --                                                                                                                                                                                      |
| -1.419770463 | down | --          | --                                                                                                                                                                                      |
| 1.28880013   | up   | HMDB0003282 | --                                                                                                                                                                                      |
| 4.170241031  | up   | HMDB0002141 | --                                                                                                                                                                                      |
| 2.023476035  | up   | HMDB0000234 | SMP0000068;SMP0000356;SMP0000565;SMP0000406                                                                                                                                             |
| -1.567769399 | down | HMDB0000536 | SMP0000067;SMP0000050;SMP0000144;SMP0000167;SMP0000365;SMP0000364;SMP0000203;SMP0000220;SMP0000210;SMP0000168;SMP0000175;SMP0000192;SMP0000427;SMP0000428;SMP0000430;SMP0000430;SMP0000 |
| -5.364071864 | down | --          | --                                                                                                                                                                                      |
| -1.30800747  | down | --          | --                                                                                                                                                                                      |
| 2.726822667  | up   | --          | --                                                                                                                                                                                      |
| 3.659882808  | up   | HMDB0000132 | SMP0000050;SMP0000144;SMP0000167;SMP0000365;SMP0000364;SMP0000203;SMP0000220;SMP0000210;SMP0000168;SMP0000427;SMP0000428;SMP0000430;SMP0000512;SMP0000513;SMP0000535;SMP0000            |
| -2.767929368 | down | --          | --                                                                                                                                                                                      |
| -3.022665192 | down | --          | --                                                                                                                                                                                      |
| -3.022665192 | down | --          | --                                                                                                                                                                                      |
| -3.073927839 | down | --          | --                                                                                                                                                                                      |
| -3.073927839 | down | --          | --                                                                                                                                                                                      |
| -3.248624063 | down | --          | --                                                                                                                                                                                      |
| -2.581442809 | down | --          | --                                                                                                                                                                                      |
| -3.163670409 | down | --          | --                                                                                                                                                                                      |
| -3.163670409 | down | --          | --                                                                                                                                                                                      |
| -2.109581027 | down | --          | --                                                                                                                                                                                      |
| -2.109581027 | down | --          | --                                                                                                                                                                                      |
| -2.895294531 | down | --          | --                                                                                                                                                                                      |
| -2.949792191 | down | --          | --                                                                                                                                                                                      |
| -1.914973462 | down | --          | --                                                                                                                                                                                      |
| -4.168200321 | down | --          | --                                                                                                                                                                                      |
| -3.272733083 | down | --          | --                                                                                                                                                                                      |
| -1.680642955 | down | --          | --                                                                                                                                                                                      |
| -1.720151449 | down | --          | --                                                                                                                                                                                      |
| -1.117989817 | down | --          | --                                                                                                                                                                                      |
| -1.112337526 | down | --          | --                                                                                                                                                                                      |
| -1.085018617 | down | --          | --                                                                                                                                                                                      |
| -1.699735821 | down | --          | --                                                                                                                                                                                      |
| -1.661305441 | down | --          | --                                                                                                                                                                                      |
| -3.154756699 | down | --          | --                                                                                                                                                                                      |
| -3.154756699 | down | --          | --                                                                                                                                                                                      |
| -2.484564502 | down | --          | --                                                                                                                                                                                      |
| -2.484564502 | down | --          | --                                                                                                                                                                                      |
| -1.492755237 | down | --          | --                                                                                                                                                                                      |
| -1.048132376 | down | HMDB0000828 | SMP0000067;SMP0000175;SMP0000192;SMP0000436;SMP0000172;SMP0000219;SMP0000178;SMP0000202                                                                                                 |
| -1.076575333 | down | HMDB0000460 | --                                                                                                                                                                                      |
| -1.173743709 | down | HMDB0000518 | SMP0000035;SMP0000314;SMP0000318;SMP0000317;SMP0000316;SMP0000315;SMP0000720                                                                                                            |
| -1.146623363 | down | HMDB0001999 | SMP0000018                                                                                                                                                                              |
| 2.317957976  | up   | HMDB0010203 | --                                                                                                                                                                                      |
| -1.235212232 | down | HMDB0002231 | --                                                                                                                                                                                      |
| -1.282323847 | down | --          | --                                                                                                                                                                                      |
| -1.216851316 | down | HMDB0012535 | --                                                                                                                                                                                      |
| -1.385557248 | down | HMDB0000500 | --                                                                                                                                                                                      |
| -1.618625643 | down | HMDB0002925 | SMP0000018                                                                                                                                                                              |
| -1.297033291 | down | HMDB0002823 | --                                                                                                                                                                                      |
| -1.722861482 | down | HMDB0001043 | SMP0000018;SMP0000075;SMP0000353;SMP0000077;SMP0000083;SMP0000084;SMP0000085;SMP0000086;SMP0000087;SMP0000093;SMP0000094;SMP0000096;SMP0000098;SMP0000101;SMP0000102;SMP0000            |
| -1.302151741 | down | HMDB0004295 | --                                                                                                                                                                                      |
| -1.860179755 | down | HMDB0004708 | --                                                                                                                                                                                      |
| -1.085351851 | down | --          | --                                                                                                                                                                                      |
| -1.581162759 | down | HMDB0002183 | SMP0000018                                                                                                                                                                              |
| -1.10387526  | down | --          | --                                                                                                                                                                                      |
| -1.593387062 | down | HMDB0010382 | SMP0000025                                                                                                                                                                              |
| -1.447948484 | down | HMDB0010383 | --                                                                                                                                                                                      |
| -1.953735496 | down | --          | --                                                                                                                                                                                      |
| -2.657854356 | down | HMDB0010386 | --                                                                                                                                                                                      |
| -1.994882512 | down | HMDB0011503 | SMP0000025                                                                                                                                                                              |
| -1.578171394 | down | HMDB0011129 | --                                                                                                                                                                                      |
| -1.842307713 | down | HMDB0011507 | --                                                                                                                                                                                      |
| -1.860434374 | down | HMDB0011487 | --                                                                                                                                                                                      |
| -1.187907529 | down | HMDB0011493 | --                                                                                                                                                                                      |
| -1.71785692  | down | HMDB0011524 | --                                                                                                                                                                                      |
| -1.880960391 | down | HMDB0011496 | --                                                                                                                                                                                      |
| -1.904502035 | down | --          | --                                                                                                                                                                                      |
| -3.25681943  | down | --          | --                                                                                                                                                                                      |

|              |      |              |                                                                                                                                                                             |
|--------------|------|--------------|-----------------------------------------------------------------------------------------------------------------------------------------------------------------------------|
| -3.431603181 | down | --           | --                                                                                                                                                                          |
| -2.201497575 | down | --           | --                                                                                                                                                                          |
| -1.51487553  | down | HMDB0240606  | --                                                                                                                                                                          |
| -1.118822813 | down | --           | --                                                                                                                                                                          |
| -1.075878292 | down | --           | --                                                                                                                                                                          |
| -1.984280186 | down | --           | --                                                                                                                                                                          |
| -1.331689739 | down | --           | --                                                                                                                                                                          |
| 1.78616409   | up   | HMDB0008002  | --                                                                                                                                                                          |
| -1.064565034 | down | HMDB0007973  | --                                                                                                                                                                          |
| -1.206689724 | down | HMDB0008143  | --                                                                                                                                                                          |
| -1.188414057 | down | HMDB0008156  | --                                                                                                                                                                          |
| -2.114534699 | down | HMDB0009394  | --                                                                                                                                                                          |
| -1.254251313 | down | HMDB0008839  | --                                                                                                                                                                          |
| -1.342873495 | down | HMDB0009005  | --                                                                                                                                                                          |
| -1.128411284 | down | HMDB0009005  | --                                                                                                                                                                          |
| -1.343046215 | down | --           | --                                                                                                                                                                          |
| 3.042903035  | up   | --           | --                                                                                                                                                                          |
| -2.2208252   | down | --           | --                                                                                                                                                                          |
| -1.60188921  | down | --           | --                                                                                                                                                                          |
| -1.375331176 | down | HMDB0009880  | --                                                                                                                                                                          |
| -1.113151014 | down | HMDB0009821  | --                                                                                                                                                                          |
| 1.224087734  | up   | HMDB0010163  | --                                                                                                                                                                          |
| 1.372910964  | up   | --           | --                                                                                                                                                                          |
| -1.267790614 | down | HMDB0012401  | --                                                                                                                                                                          |
| 1.343888653  | up   | HMDB0010700  | --                                                                                                                                                                          |
| 1.295797286  | up   | --           | --                                                                                                                                                                          |
| -1.639355222 | down | HMDB0007849  | --                                                                                                                                                                          |
| -2.021726916 | down | HMDB07849    | --                                                                                                                                                                          |
| -1.680209089 | down | HMDB07849    | --                                                                                                                                                                          |
| 1.891246996  | up   | HMDB0000674  | SMP0000025;SMP0000039;SMP0000187;SMP0000529;SMP0000530                                                                                                                      |
| 1.916668783  | up   | --           | --                                                                                                                                                                          |
| -1.83238652  | down | --           | --                                                                                                                                                                          |
| -1.192153205 | down | HMDB00062555 | --                                                                                                                                                                          |
| -1.830134372 | down | HMDB0002095  | --                                                                                                                                                                          |
| -1.156147317 | down | HMDB00061717 | --                                                                                                                                                                          |
| -1.000676386 | down | HMDB0002366  | --                                                                                                                                                                          |
| 1.762724608  | up   | HMDB0013324  | --                                                                                                                                                                          |
| -2.026955729 | down | --           | --                                                                                                                                                                          |
| -1.56884163  | down | HMDB0013331  | --                                                                                                                                                                          |
| -1.641679329 | down | HMDB0013334  | --                                                                                                                                                                          |
| -2.375216782 | down | HMDB0006469  | --                                                                                                                                                                          |
| 2.877801438  | up   | HMDB0000918  | --                                                                                                                                                                          |
| 1.593988862  | up   | --           | --                                                                                                                                                                          |
| 1.537512492  | up   | --           | --                                                                                                                                                                          |
| 1.950981059  | up   | --           | --                                                                                                                                                                          |
| -1.118924482 | down | HMDB0007100  | --                                                                                                                                                                          |
| 3.819022147  | up   | HMDB00094301 | --                                                                                                                                                                          |
| -1.512609048 | down | HMDB0007108  | --                                                                                                                                                                          |
| -1.941487673 | down | HMDB0007160  | --                                                                                                                                                                          |
| 2.359989592  | up   | HMDB0007128  | --                                                                                                                                                                          |
| -1.404102201 | down | HMDB0007161  | --                                                                                                                                                                          |
| -2.257530701 | down | HMDB0007167  | --                                                                                                                                                                          |
| -1.127032524 | down | HMDB0007253  | --                                                                                                                                                                          |
| -1.199887671 | down | HMDB0007225  | --                                                                                                                                                                          |
| 11.38079974  | up   | HMDB0007134  | --                                                                                                                                                                          |
| -1.395982349 | down | HMDB0007119  | --                                                                                                                                                                          |
| -1.360659558 | down | HMDB0007177  | --                                                                                                                                                                          |
| -1.38613156  | down | HMDB0007234  | --                                                                                                                                                                          |
| -1.49839653  | down | HMDB0007121  | --                                                                                                                                                                          |
| -1.24541091  | down | HMDB0007148  | --                                                                                                                                                                          |
| -1.879395262 | down | HMDB0007263  | --                                                                                                                                                                          |
| -1.743332049 | down | HMDB0007236  | --                                                                                                                                                                          |
| -1.590919136 | down | HMDB0007179  | --                                                                                                                                                                          |
| -2.058904522 | down | HMDB0007208  | --                                                                                                                                                                          |
| -1.373076483 | down | HMDB0007266  | --                                                                                                                                                                          |
| -1.900218172 | down | HMDB0011566  | --                                                                                                                                                                          |
| -2.029542937 | down | --           | --                                                                                                                                                                          |
| -1.712842771 | down | HMDB0004879  | --                                                                                                                                                                          |
| -1.60226891  | down | HMDB0010379  | SMP0000075;SMP0000353;SMP0000077;SMP0000083;SMP0000084;SMP0000085;SMP0000086;SMP0000087;SMP0000093;SMP0000094;SMP0000096;SMP0000098;SMP0000101;SMP0000102;SMP0000104;SMP000 |
| -1.022321001 | down | --           | --                                                                                                                                                                          |
| -1.179413037 | down | HMDB0010381  | --                                                                                                                                                                          |
| -1.347637817 | down | HMDB0012108  | --                                                                                                                                                                          |
| -1.865824304 | down | --           | --                                                                                                                                                                          |
| -2.019852981 | down | --           | --                                                                                                                                                                          |
| -2.080515476 | down | HMDB0010385  | --                                                                                                                                                                          |
| -2.442646779 | down | --           | --                                                                                                                                                                          |
| -2.556679509 | down | --           | --                                                                                                                                                                          |
| -1.345579798 | down | --           | --                                                                                                                                                                          |
| -3.423052005 | down | --           | --                                                                                                                                                                          |
| -2.72998576  | down | --           | --                                                                                                                                                                          |
| -2.852483201 | down | HMDB0010392  | --                                                                                                                                                                          |
| -2.938180189 | down | HMDB0010388  | --                                                                                                                                                                          |
| -2.923467446 | down | HMDB0010393  | --                                                                                                                                                                          |
| -2.662831713 | down | HMDB0010389  | --                                                                                                                                                                          |
| -1.885926117 | down | HMDB0010395  | --                                                                                                                                                                          |
| -2.391796512 | down | --           | --                                                                                                                                                                          |
| -2.298444948 | down | HMDB0010401  | --                                                                                                                                                                          |
| -2.727473564 | down | HMDB0010397  | --                                                                                                                                                                          |
| -2.255673948 | down | --           | --                                                                                                                                                                          |
| -2.757414464 | down | HMDB0010402  | --                                                                                                                                                                          |
| -2.283895096 | down | HMDB0010404  | --                                                                                                                                                                          |
| -1.742364875 | down | --           | --                                                                                                                                                                          |
| -1.982340994 | down | HMDB0011130  | --                                                                                                                                                                          |
| -1.958464629 | down | HMDB0011481  | --                                                                                                                                                                          |
| -1.34442368  | down | HMDB0011490  | --                                                                                                                                                                          |
| -2.554915611 | down | HMDB0011477  | --                                                                                                                                                                          |
| -1.527657217 | down | HMDB0011483  | --                                                                                                                                                                          |
| -1.719434965 | down | --           | --                                                                                                                                                                          |
| -1.803799179 | down | HMDB0011516  | --                                                                                                                                                                          |
| -2.908209295 | down | --           | --                                                                                                                                                                          |
| -2.155164375 | down | HMDB0011494  | --                                                                                                                                                                          |
| -1.854219183 | down | HMDB0011152  | --                                                                                                                                                                          |
| -1.39125557  | down | HMDB0240998  | --                                                                                                                                                                          |
| -2.150717644 | down | --           | --                                                                                                                                                                          |
| -1.445322268 | down | --           | --                                                                                                                                                                          |
| -2.246931059 | down | --           | --                                                                                                                                                                          |
| -1.548408811 | down | HMDB0240605  | --                                                                                                                                                                          |
| -1.155714851 | down | HMDB0007984  | --                                                                                                                                                                          |
| 1.050450524  | up   | HMDB0013404  | --                                                                                                                                                                          |
| -1.426393509 | down | HMDB0011151  | --                                                                                                                                                                          |
| 1.131733811  | up   | --           | --                                                                                                                                                                          |
| -1.203786871 | down | --           | --                                                                                                                                                                          |
| -2.119466368 | down | --           | --                                                                                                                                                                          |
| -1.055253058 | down | --           | --                                                                                                                                                                          |
| -1.265209542 | down | HMDB0009056  | --                                                                                                                                                                          |
| 1.175402178  | up   | HMDB0008961  | --                                                                                                                                                                          |
| -1.216917132 | down | --           | --                                                                                                                                                                          |
| -1.826417604 | down | HMDB0008970  | --                                                                                                                                                                          |
| -1.021319474 | down | HMDB0009010  | --                                                                                                                                                                          |
| -1.015198657 | down | HMDB0008913  | --                                                                                                                                                                          |
| -1.104562525 | down | --           | --                                                                                                                                                                          |
| -1.848197305 | down | HMDB0009691  | --                                                                                                                                                                          |
| 1.110731769  | up   | HMDB0011380  | --                                                                                                                                                                          |
| 2.716576821  | up   | HMDB0012357  | --                                                                                                                                                                          |
| 1.808892434  | up   | HMDB0112417  | --                                                                                                                                                                          |
| 1.199047338  | up   | HMDB0012085  | --                                                                                                                                                                          |
| 1.064829797  | up   | HMDB0010168  | --                                                                                                                                                                          |
| 1.006895574  | up   | HMDB0010169  | --                                                                                                                                                                          |
| 1.13332951   | up   | HMDB0240637  | --                                                                                                                                                                          |
| 1.275245371  | up   | HMDB0012104  | --                                                                                                                                                                          |
| 1.141110548  | up   | HMDB0240614  | --                                                                                                                                                                          |
| 1.373670328  | up   | --           | --                                                                                                                                                                          |
| 1.523817318  | up   | HMDB0013461  | --                                                                                                                                                                          |
| 2.245970625  | up   | HMDB0011188  | --                                                                                                                                                                          |
| 5.955187115  | up   | HMDB0071936  | --                                                                                                                                                                          |
| 2.40326738   | up   | HMDB0071588  | --                                                                                                                                                                          |
| 5.070628766  | up   | HMDB0071914  | --                                                                                                                                                                          |
| 2.966378297  | up   | HMDB0071634  | --                                                                                                                                                                          |
| 6.225020592  | up   | HMDB0072111  | --                                                                                                                                                                          |

|             |    |             |                                             |
|-------------|----|-------------|---------------------------------------------|
| 4.938025752 | up | HMDB0095276 | --                                          |
| 3.324696083 | up | HMDB0095006 | --                                          |
| 4.958917445 | up | HMDB0042063 | --                                          |
| 4.050766744 | up | HMDB0095296 | --                                          |
| 4.787747229 | up | HMDB0095566 | --                                          |
| 3.67924461  | up | HMDB0042093 | --                                          |
| 5.63735328  | up | HMDB0010411 | --                                          |
| 5.602096061 | up | HMDB0043019 | --                                          |
| 5.39832476  | up | HMDB0005356 | SMP0000039;SMP0000187;SMP0000529;SMP0000530 |
| 5.559702644 | up | HMDB0042124 | --                                          |
| 6.75309829  | up | HMDB0104223 | --                                          |
| 5.520979559 | up | HMDB0005357 | --                                          |
| 6.264374675 | up | HMDB0005365 | --                                          |
| 7.175197939 | up | HMDB0042155 | --                                          |
| 4.316743947 | up | HMDB0106781 | --                                          |
| 5.115470619 | up | HMDB0005393 | --                                          |
| 4.827363171 | up | HMDB0043916 | --                                          |
| 14.39865711 | up | --          | --                                          |
| 5.680117841 | up | --          | --                                          |
| 5.470488945 | up | --          | --                                          |
| 4.970175929 | up | --          | --                                          |
| 5.589838143 | up | --          | --                                          |
| 4.351800277 | up | --          | --                                          |
| 5.530130905 | up | --          | --                                          |
| 2.746145279 | up | --          | --                                          |
| 4.5493515   | up | --          | --                                          |
| 5.553388521 | up | --          | --                                          |
| 4.112149027 | up | --          | --                                          |
| 3.190539716 | up | --          | --                                          |
| 1.710484575 | up | HMDB0042099 | --                                          |
| 4.946229541 | up | --          | --                                          |
| 5.470714414 | up | HMDB0042129 | --                                          |
| 3.858376165 | up | HMDB0043025 | --                                          |
| 3.403904882 | up | HMDB0042100 | --                                          |
| 4.307894782 | up | HMDB0005359 | --                                          |
| 4.866251449 | up | HMDB0042131 | --                                          |
| 5.406346431 | up | HMDB0043027 | --                                          |
| 5.098285684 | up | HMDB0005360 | --                                          |
| 6.050538426 | up | --          | --                                          |
| 3.950983292 | up | HMDB0005367 | --                                          |
| 4.043121079 | up | HMDB0005375 | --                                          |
| 6.360297532 | up | --          | --                                          |
| 6.628548742 | up | --          | --                                          |
| 6.305417936 | up | HMDB0005368 | --                                          |
| 5.583291216 | up | HMDB0005395 | --                                          |
| 4.965386424 | up | HMDB0005368 | --                                          |
| 4.457504188 | up | --          | --                                          |
| 3.809355588 | up | HMDB0044004 | --                                          |
| 5.388954442 | up | --          | --                                          |
| 14.6241058  | up | --          | --                                          |
| 3.791109789 | up | --          | --                                          |
| 6.111634849 | up | --          | --                                          |
| 4.8792999   | up | --          | --                                          |
| 2.978300433 | up | --          | --                                          |
| 3.838960187 | up | HMDB0042279 | --                                          |
| 4.103266364 | up | --          | --                                          |
| 4.850888695 | up | --          | --                                          |
| 3.362161748 | up | HMDB0043170 | --                                          |
| 5.321371638 | up | HMDB0047771 | --                                          |
| 5.502025446 | up | --          | --                                          |
| 4.663637382 | up | HMDB0042281 | --                                          |
| 4.938338278 | up | HMDB0042106 | --                                          |
| 3.528986002 | up | HMDB0043199 | --                                          |
| 5.287251175 | up | --          | --                                          |
| 5.106518458 | up | HMDB0010415 | --                                          |
| 4.689836198 | up | HMDB0010420 | --                                          |
| 5.209674826 | up | HMDB0010420 | --                                          |
| 4.965511953 | up | --          | --                                          |
| 5.74105671  | up | HMDB0043022 | --                                          |
| 5.722413788 | up | HMDB0043201 | --                                          |
| 5.086482886 | up | HMDB0005377 | --                                          |
| 5.026850704 | up | HMDB0010430 | --                                          |
| 5.756252779 | up | --          | --                                          |
| 6.051524805 | up | --          | --                                          |
| 4.232177239 | up | HMDB0005382 | --                                          |
| 4.255362544 | up | HMDB0005369 | --                                          |
| 3.73072643  | up | HMDB0005378 | --                                          |
| 3.836216613 | up | HMDB0042168 | --                                          |
| 5.947706034 | up | HMDB0062701 | --                                          |
| 6.67796068  | up | --          | --                                          |
| 4.899460227 | up | HMDB0005383 | --                                          |
| 4.97254637  | up | HMDB0005424 | --                                          |
| 3.971261761 | up | HMDB0005403 | --                                          |
| 5.451836605 | up | HMDB0044064 | --                                          |
| 5.748965845 | up | --          | --                                          |
| 5.658374725 | up | HMDB0005404 | --                                          |
| 6.324661709 | up | HMDB0044120 | --                                          |
| 3.861623534 | up | HMDB0046485 | --                                          |
| 5.909171562 | up | HMDB0044815 | --                                          |
| 5.840936984 | up | HMDB0044093 | --                                          |
| 5.554694964 | up | --          | --                                          |
| 12.54220788 | up | --          | --                                          |
| 13.71449199 | up | --          | --                                          |
| 4.829529089 | up | HMDB0047886 | --                                          |
| 5.003156258 | up | --          | --                                          |
| 5.212848992 | up | --          | --                                          |
| 4.067196969 | up | --          | --                                          |
| 1.548769664 | up | --          | --                                          |
| 15.89975901 | up | HMDB0047909 | --                                          |
| 5.451677899 | up | --          | --                                          |
| 5.681853512 | up | --          | --                                          |
| 6.087882852 | up | HMDB0047911 | --                                          |
| 5.415350782 | up | HMDB0042316 | --                                          |
| 5.450635097 | up | HMDB0044038 | --                                          |
| 4.505110994 | up | --          | --                                          |
| 5.367004951 | up | --          | --                                          |
| 6.169400108 | up | --          | --                                          |
| 5.498237231 | up | HMDB0048590 | --                                          |
| 5.953040385 | up | HMDB0005379 | --                                          |
| 6.467970907 | up | --          | --                                          |
| 6.054604998 | up | HMDB0011708 | --                                          |
| 6.371147736 | up | --          | --                                          |
| 4.922843998 | up | HMDB0005438 | --                                          |
| 4.160621351 | up | HMDB0005384 | --                                          |
| 4.183852203 | up | HMDB0042378 | --                                          |
| 5.64019663  | up | --          | --                                          |
| 6.567386221 | up | --          | --                                          |
| 3.623349925 | up | HMDB0005453 | --                                          |
| 3.625691822 | up | HMDB0005405 | --                                          |
| 4.384387692 | up | HMDB0044096 | --                                          |
| 15.37460432 | up | --          | --                                          |
| 5.98966782  | up | --          | --                                          |
| 5.125929682 | up | HMDB0005459 | --                                          |
| 4.87876579  | up | HMDB0005454 | --                                          |
| 5.760955921 | up | HMDB0048638 | --                                          |
| 4.062709679 | up | HMDB0005410 | --                                          |
| 11.43570884 | up | --          | --                                          |
| 5.190548338 | up | HMDB0010466 | --                                          |
| 4.472574827 | up | --          | --                                          |
| 6.196704777 | up | HMDB0005457 | --                                          |
| 4.080998579 | up | HMDB0049924 | --                                          |
| 4.067001631 | up | HMDB0049266 | --                                          |
| 3.098186691 | up | HMDB0047230 | --                                          |
| 5.004555091 | up | --          | --                                          |
| 14.09028992 | up | --          | --                                          |
| 5.217192431 | up | --          | --                                          |
| 5.143691664 | up | --          | --                                          |
| 5.706486261 | up | HMDB0047916 | --                                          |
| 5.054009749 | up | --          | --                                          |

|             |    |              |    |
|-------------|----|--------------|----|
| 4.507750433 | up | --           | -- |
| 6.794581482 | up | HMDB0042317  | -- |
| 4.638135506 | up | HMDB0042526  | -- |
| 4.961612463 | up | HMDB0005435  | -- |
| 5.429730752 | up | HMDB0042140  | -- |
| 5.543956104 | up | HMDB0044074  | -- |
| 5.666821723 | up | HMDB0011711  | -- |
| 6.173483451 | up | --           | -- |
| 5.992823569 | up | HMDB0005440  | -- |
| 5.033265878 | up | HMDB0005363  | -- |
| 4.714833635 | up | HMDB0005390  | -- |
| 6.407520146 | up | --           | -- |
| 6.200080059 | up | --           | -- |
| 4.399653653 | up | HMDB0005455  | -- |
| 4.662221739 | up | HMDB0005370  | -- |
| 5.927428489 | up | --           | -- |
| 6.213019412 | up | --           | -- |
| 3.946867779 | up | --           | -- |
| 4.159602353 | up | HMDB0005460  | -- |
| 3.97754907  | up | HMDB0044953  | -- |
| 4.465715816 | up | HMDB0048645  | -- |
| 4.023845033 | up | HMDB0049911  | -- |
| 4.175734242 | up | HMDB0049351  | -- |
| 4.964938736 | up | HMDB0049372  | -- |
| 4.399651524 | up | --           | -- |
| 4.866749632 | up | --           | -- |
| 13.30267594 | up | HMDB0047917  | -- |
| 6.642944114 | up | HMDB0048604  | -- |
| 5.006167086 | up | HMDB0010471  | -- |
| 5.449657415 | up | HMDB0048077  | -- |
| 7.280713392 | up | --           | -- |
| 6.085802778 | up | HMDB0042320  | -- |
| 14.47066102 | up | HMDB0043410  | -- |
| 12.65486804 | up | HMDB0043210  | -- |
| 7.433322774 | up | --           | -- |
| 5.460091504 | up | --           | -- |
| 6.017533932 | up | HMDB0044263  | -- |
| 5.755352899 | up | HMDB0048648  | -- |
| 5.932844461 | up | HMDB0005380  | -- |
| 6.260916703 | up | --           | -- |
| 5.745551623 | up | HMDB0043268  | -- |
| 5.182931594 | up | HMDB0005461  | -- |
| 4.494056761 | up | HMDB0005385  | -- |
| 5.235777025 | up | HMDB0048643  | -- |
| 4.771614804 | up | --           | -- |
| 4.855807296 | up | --           | -- |
| 6.597309724 | up | --           | -- |
| 4.210754668 | up | HMDB0045114  | -- |
| 5.88527015  | up | HMDB0044128  | -- |
| 4.669474216 | up | HMDB0049395  | -- |
| 3.246571076 | up | HMDB0005406  | -- |
| 4.404158422 | up | HMDB0005473  | -- |
| 3.835721871 | up | HMDB0005291  | -- |
| 4.937095267 | up | HMDB0049398  | -- |
| 5.057861882 | up | HMDB0044956  | -- |
| 5.902227322 | up | --           | -- |
| 4.436588393 | up | HMDB0005158  | -- |
| 4.278266702 | up | HMDB0048078  | -- |
| 13.63075407 | up | --           | -- |
| 4.178073819 | up | --           | -- |
| 4.56684082  | up | --           | -- |
| 7.431814103 | up | HMDB0044077  | -- |
| 5.588168229 | up | HMDB0048751  | -- |
| 5.818444592 | up | HMDB0044271  | -- |
| 14.53430964 | up | --           | -- |
| 4.444001793 | up | HMDB0005391  | -- |
| 5.579169947 | up | HMDB0010481  | -- |
| 6.373017424 | up | HMDB0044073  | -- |
| 4.443596233 | up | HMDB0010418  | -- |
| 4.650873175 | up | HMDB0044134  | -- |
| 4.351497313 | up | HMDB0005412  | -- |
| 4.80164259  | up | HMDB0043939  | -- |
| 3.811907922 | up | HMDB0010491  | -- |
| 5.328779283 | up | HMDB0010467  | -- |
| 3.787520856 | up | --           | -- |
| 5.172800635 | up | --           | -- |
| 6.016960941 | up | HMDB0042560  | -- |
| 12.82518352 | up | HMDB0048607  | -- |
| 4.891114129 | up | HMDB0044273  | -- |
| 4.698648962 | up | HMDB0044079  | -- |
| 6.060703641 | up | HMDB0049402  | -- |
| 5.543523389 | up | HMDB0010489  | -- |
| 14.59828517 | up | HMDB0043248  | -- |
| 4.905017558 | up | HMDB0005462  | -- |
| 4.590286159 | up | HMDB0044135  | -- |
| 6.391475507 | up | --           | -- |
| 2.917676365 | up | HMDB0044936  | -- |
| 3.247893647 | up | HMDB0010468  | -- |
| 5.111072601 | up | HMDB0049399  | -- |
| 5.033914418 | up | HMDB0044325  | -- |
| 5.935722434 | up | HMDB0047929  | -- |
| 4.411566203 | up | HMDB00052637 | -- |
| 4.207628115 | up | HMDB0048609  | -- |
| 4.508784951 | up | HMDB0044275  | -- |
| 4.329494635 | up | HMDB0048631  | -- |
| 4.824086907 | up | --           | -- |
| 5.678225106 | up | --           | -- |
| 3.702346016 | up | HMDB0049400  | -- |
| 3.256432977 | up | HMDB0010465  | -- |
| 3.626918417 | up | HMDB0045098  | -- |
| 4.853972845 | up | HMDB0010494  | -- |
| 3.940617312 | up | HMDB0049322  | -- |
| 4.531794857 | up | HMDB0044525  | -- |
| 4.211917009 | up | --           | -- |
| 5.543041181 | up | HMDB0048763  | -- |
| 4.500101135 | up | HMDB0005448  | -- |
| 3.486023985 | up | HMDB0049406  | -- |
| 4.066315452 | up | HMDB00052580 | -- |
| 3.903243568 | up | HMDB0044381  | -- |
| 3.207063097 | up | HMDB00050602 | -- |
| 4.266527518 | up | HMDB0010496  | -- |
| 4.134912717 | up | HMDB0005476  | -- |
| 4.056609615 | up | HMDB00052649 | -- |
| 2.177857267 | up | HMDB0049490  | -- |
| 4.303884086 | up | HMDB0044639  | -- |
| 1.344203816 | up | HMDB00052739 | -- |
