# Supplementary material for: The Regulation Network of Glycerolipid Metabolism as Coregulators of Immunotherapy-Related Myocarditis
Source: Hindawi journal article supplement (doi:10.1155/2023/8774971), 2023-06-21
Supplement: f7 [file 8774971.f7.pdf]

Table S7

| name                                                | Total Cmpd | Hits | Pvalue   | Holm p | FDR     | foldEnrichment | hitCompound                                                                                                                                                                        |
|-----------------------------------------------------|------------|------|----------|--------|---------|----------------|------------------------------------------------------------------------------------------------------------------------------------------------------------------------------------|
| Glycerophospholipid metabolism                      | 36         | 2    | 0.028259 | 1      | 0.31238 | 3.6463         | Choline,Acetylcholine                                                                                                                                                              |
| Steroid hormone biosynthesis                        | 85         | 4    | 0.03611  | 1      | 0.31238 | 3.5306         | Cholesterol,Aldosterone,Cortisol,Testosterone                                                                                                                                      |
| Steroid biosynthesis                                | 42         | 2    | 0.036124 | 1      | 0.31238 | 3.53235        | Cholesterol,Calcitriol                                                                                                                                                             |
| Retinol metabolism                                  | 17         | 1    | 0.040496 | 1      | 0.31238 | 3.4516         | 11-cis-Retinol                                                                                                                                                                     |
| Drug metabolism - other enzymes                     | 39         | 1    | 0.042473 | 1      | 0.31238 | 3.4167         | Isonicotinic acid                                                                                                                                                                  |
| Ascorbate and aldarate metabolism                   | 8          | 1    | 0.045556 | 1      | 0.31238 | 3.36415        | myo-Inositol                                                                                                                                                                       |
| Phosphatidylinositol signaling system               | 28         | 1    | 0.045556 | 1      | 0.31238 | 3.36415        | myo-Inositol                                                                                                                                                                       |
| Caffeine metabolism                                 | 10         | 1    | 0.079947 | 1      | 0.39593 | 2.8825         | 7-Methyluric acid                                                                                                                                                                  |
| Histidine metabolism                                | 16         | 3    | 0.084442 | 1      | 0.39593 | 2.8283         | L-Histidine,Carnosine,Histamine                                                                                                                                                    |
| beta-Alanine metabolism                             | 21         | 4    | 0.084456 | 1      | 0.39593 | 2.82935        | Carnosine,Uracil,L-Histidine,Spermidine                                                                                                                                            |
| Glycine, serine and threonine metabolism            | 33         | 8    | 0.090733 | 1      | 0.39593 | 2.7155         | L-Serine,Choline,Betaine,Glycine,Sarcosine,L-Threonine,Creatine,L-Cysteine                                                                                                         |
| Thiamine metabolism                                 | 7          | 2    | 0.12929  | 1      | 0.51716 | 1.87775        | L-Cysteine,Thiamine                                                                                                                                                                |
| Starch and sucrose metabolism                       | 18         | 1    | 0.16479  | 1      | 0.60845 | 2.094          | D-Fructose                                                                                                                                                                         |
| Aminocyl-rRNA biosynthesis                          | 48         | 16   | 0.25936  | 1      | 0.85143 | 1.32375        | L-Histidine,L-Phenylalanine,L-Arginine,L-Glutamine,L-Cysteine,Glycine,L-Serine,L-Methionine,L-Valine,L-Alanine,L-Lysine,L-Isoleucine,L-Threonine,L-Tryptophan,L-Tyrosine,L-Proline |
| Galactose metabolism                                | 27         | 4    | 0.26607  | 1      | 0.85143 | 1.41255        | D-Fructose,Galactitol,D-Mannose,myo-Inositol                                                                                                                                       |
| Fructose and mannose metabolism                     | 20         | 5    | 0.32512  | 1      | 0.88552 | 1.1663         | D-Fructose,D-Mannose,D-Mannose 1-phosphate,D-Glyceraldehyde 3-phosphate,GDP-L-fucose                                                                                               |
| Lysine degradation                                  | 25         | 1    | 0.35214  | 1      | 0.88552 | 1.08365        | L-Lysine                                                                                                                                                                           |
| Biotin metabolism                                   | 10         | 2    | 0.35214  | 1      | 0.88552 | 1.08365        | Biotin,L-Lysine                                                                                                                                                                    |
| Porphyrin and chlorophyll metabolism                | 30         | 3    | 0.36497  | 1      | 0.88552 | 1.0342         | Glycine,Biliverdin,Porphobilinogen                                                                                                                                                 |
| Glutathione metabolism                              | 28         | 5    | 0.40723  | 1      | 0.88552 | 0.88315        | Glutathione,Glycine,L-Cysteine,Putrescine,Spermidine                                                                                                                               |
| Amino sugar and nucleotide sugar metabolism         | 37         | 4    | 0.40723  | 1      | 0.88552 | 0.8462         | N-Acetyl-D-glucosamine,D-Mannose 1-phosphate,GDP-L-fucose,D-Mannose                                                                                                                |
| Riboflavin metabolism                               | 4          | 2    | 0.47847  | 1      | 0.88552 | 0.67305        | Riboflavin,FAD                                                                                                                                                                     |
| Arginine biosynthesis                               | 14         | 5    | 0.50428  | 1      | 0.88552 | 0.6452         | L-Arginine,N-Acetylmethionine,Carbamoyl phosphate,L-Glutamine,Urea                                                                                                                 |
| Arginine and proline metabolism                     | 38         | 6    | 0.50935  | 1      | 0.88552 | 0.83705        | L-Arginine,Creatine,Putrescine,Spermidine,L-Proline,cis-4-Hydroxy-D-proline                                                                                                        |
| Sphingolipid metabolism                             | 21         | 1    | 0.52558  | 1      | 0.88552 | 0.5381         | L-Serine                                                                                                                                                                           |
| Pyrimidine metabolism                               | 39         | 7    | 0.52929  | 1      | 0.88552 | 0.5361         | L-Glutamine,Carbamoyl phosphate,Uridine,Cytidine,dCDP,dCMP,Uracil                                                                                                                  |
| Nitrogen metabolism                                 | 6          | 2    | 0.53082  | 1      | 0.88552 | 0.52985        | Carbamoyl phosphate,L-Glutamine                                                                                                                                                    |
| D-Glutamine and D-glutamate metabolism              | 6          | 1    | 0.53129  | 1      | 0.88552 | 0.5242         | L-Glutamine                                                                                                                                                                        |
| Glyoxylate and dicarboxylate metabolism             | 32         | 3    | 0.535    | 1      | 0.88552 | 0.52445        | L-Serine,Glycine,L-Glutamine                                                                                                                                                       |
| Tryptophan metabolism                               | 41         | 3    | 0.58285  | 1      | 0.92637 | 0.406685       | L-Tryptophan,N-Acetylserotonin,5-Methoxyindoleacetate                                                                                                                              |
| Pantothenate and CoA biosynthesis                   | 19         | 4    | 0.60058  | 1      | 0.92637 | 0.373485       | Pantetheine,L-Valine,L-Cysteine,Uracil                                                                                                                                             |
| Selenocompound metabolism                           | 20         | 1    | 0.61758  | 1      | 0.92637 | 0.34025        | L-Alanine                                                                                                                                                                          |
| alpha-Linolenic acid metabolism                     | 13         | 1    | 0.70922  | 1      | 0.952   | 0.19282        | Stearidonic acid                                                                                                                                                                   |
| Inositol phosphate metabolism                       | 30         | 2    | 0.74667  | 1      | 0.952   | 0.18451        | myo-Inositol,D-Glyceraldehyde 3-phosphate                                                                                                                                          |
| Alanine, aspartate and glutamate metabolism         | 28         | 3    | 0.75657  | 1      | 0.952   | 0.40632        | L-Alanine,L-Glutamine,Carbamoyl phosphate                                                                                                                                          |
| Cysteine and methionine metabolism                  | 33         | 3    | 0.76517  | 1      | 0.952   | 0.14933        | L-Serine,L-Methionine,L-Cysteine                                                                                                                                                   |
| Purine metabolism                                   | 65         | 13   | 0.79882  | 1      | 0.952   | 0.41902        | Xanthine,L-Glutamine,ADP,Adenosine,Deoxyinosine,Xanthosine,Hypoxanthine,Inosine,Guanine,Deoxyguanosine,Guanosine,Adenine,Urea                                                      |
| Glycolysis / Gluconeogenesis                        | 26         | 1    | 0.81592  | 1      | 0.952   | 0.076075       | D-Glyceraldehyde 3-phosphate                                                                                                                                                       |
| Pentose phosphate pathway                           | 22         | 1    | 0.81592  | 1      | 0.952   | 0.076075       | D-Glyceraldehyde 3-phosphate                                                                                                                                                       |
| Vitamin B6 metabolism                               | 9          | 1    | 0.83046  | 1      | 0.952   | 0.06443        | Pyridoxal                                                                                                                                                                          |
| Primary bile acid biosynthesis                      | 46         | 3    | 0.85052  | 1      | 0.952   | 0.06832        | Cholesterol,Glycine,Taurine                                                                                                                                                        |
| Tyrosine metabolism                                 | 42         | 2    | 0.8863   | 1      | 0.952   | 0.028838       | L-Tyrosine,Thyroxine                                                                                                                                                               |
| Ubiquinone and other terpenoid-quinone biosynthesis | 9          | 1    | 0.8863   | 1      | 0.952   | 0.028838       | L-Tyrosine                                                                                                                                                                         |
| Valine, leucine and isoleucine degradation          | 40         | 2    | 0.8898   | 1      | 0.952   | 0.09873        | L-Valine,L-Isoleucine                                                                                                                                                              |
| Valine, leucine and isoleucine biosynthesis         | 8          | 3    | 0.8925   | 1      | 0.952   | 0.098745       | L-Threonine,L-Isoleucine,L-Valine                                                                                                                                                  |
| Phenylalanine metabolism                            | 10         | 2    | 0.95973  | 1      | 0.96368 | 0.02528        | L-Phenylalanine,L-Tyrosine                                                                                                                                                         |
| Phenylalanine, tyrosine and tryptophan biosynthesis | 4          | 2    | 0.95973  | 1      | 0.96368 | 0.02528        | L-Phenylalanine,L-Tyrosine                                                                                                                                                         |
| Taurine and hypotaurine metabolism                  | 8          | 3    | 0.96368  | 1      | 0.96368 | 0.00316665     | L-Cysteine,Taurine,Hypotaurine                                                                                                                                                     |
