# Supplementary material for: The Regulation Network of Glycerolipid Metabolism as Coregulators of Immunotherapy-Related Myocarditis
Source: Cardiovasc Ther. 2023 Jun 21;2023:8774971. doi: 10.1155/2023/8774971 (PMC10307211; doi:10.1155/2023/8774971)
Supplement: Supplementary 5 — Table S5: the Gene Set Enrichment Analysis (GSEA) map enrichment results for PTT-related DEGs of the T cell subpopulation. [file 8774971.f5.pdf]

| Table S5                                                             |                                                                      |                                                                      |                 |               |              |            |          |          |              |
|----------------------------------------------------------------------|----------------------------------------------------------------------|----------------------------------------------------------------------|-----------------|---------------|--------------|------------|----------|----------|--------------|
| ID                                                                   | Description                                                          | setSize                                                              | enrichmentScore | NES           | pvalue       | p.adjust   | qvalues  | rank     | leading_edge |
| GOBP_AMIDE_BIOSYNTHETIC_PROCESS                                      | GOBP_AMIDE_BIOSYNTHETIC_PROCESS                                      | GOBP_AMIDE_BIOSYNTHETIC_PROCESS                                      | 111             | 0.374134495   | 3.175533752  | 1E-10      | 5.72E-08 | 5.35E-08 | 302          |
| GOBP_CYTOPLASMIC_TRANSLATION                                         | GOBP_CYTOPLASMIC_TRANSLATION                                         | GOBP_CYTOPLASMIC_TRANSLATION                                         | 50              | 0.641221364   | 4.294788495  | 1E-10      | 5.72E-08 | 5.35E-08 | 284          |
| GOBP_PEPTIDE_BIOSYNTHETIC_PROCESS                                    | GOBP_PEPTIDE_BIOSYNTHETIC_PROCESS                                    | GOBP_PEPTIDE_BIOSYNTHETIC_PROCESS                                    | 107             | 0.388128529   | 3.288181361  | 1E-10      | 5.72E-08 | 5.35E-08 | 302          |
| GOBP_PEPTIDE_METABOLIC_PROCESS                                       | GOBP_PEPTIDE_METABOLIC_PROCESS                                       | GOBP_PEPTIDE_METABOLIC_PROCESS                                       | 118             | 0.35512504    | 3.077042096  | 1E-10      | 5.72E-08 | 5.35E-08 | 302          |
| GOBP_RESPONSE_TO_TOPOLOGICALLY_INCORRECT_PROTEIN                     | GOBP_RESPONSE_TO_TOPOLOGICALLY_INCORRECT_PROTEIN                     | GOBP_RESPONSE_TO_TOPOLOGICALLY_INCORRECT_PROTEIN                     | 42              | 0.5517403     | 3.520797721  | 1E-10      | 5.72E-08 | 5.35E-08 | 20           |
| GOCC_CYTOSOLIC_LARGE_RIBOSOMAL_SUBUNIT                               | GOCC_CYTOSOLIC_LARGE_RIBOSOMAL_SUBUNIT                               | GOCC_CYTOSOLIC_LARGE_RIBOSOMAL_SUBUNIT                               | 23              | 0.774416595   | 3.881178576  | 1E-10      | 5.72E-08 | 5.35E-08 | 284          |
| GOCC_CYTOSOLIC_RIBOSOME                                              | GOCC_CYTOSOLIC_RIBOSOME                                              | GOCC_CYTOSOLIC_RIBOSOME                                              | 43              | 0.788038698   | 5.03783617   | 1E-10      | 5.72E-08 | 5.35E-08 | 284          |
| GOCC_CYTOSOLIC_SMALL_RIBOSOMAL_SUBUNIT                               | GOCC_CYTOSOLIC_SMALL_RIBOSOMAL_SUBUNIT                               | GOCC_CYTOSOLIC_SMALL_RIBOSOMAL_SUBUNIT                               | 21              | 0.781708369   | 3.828502731  | 1E-10      | 5.72E-08 | 5.35E-08 | 274          |
| GOCC_LARGE_RIBOSOMAL_SUBUNIT                                         | GOCC_LARGE_RIBOSOMAL_SUBUNIT                                         | GOCC_LARGE_RIBOSOMAL_SUBUNIT                                         | 25              | 0.741419833   | 3.913143758  | 1E-10      | 5.72E-08 | 5.35E-08 | 284          |
| GOCC_RIBOSOMAL_SUBUNIT                                               | GOCC_RIBOSOMAL_SUBUNIT                                               | GOCC_RIBOSOMAL_SUBUNIT                                               | 48              | 0.750756231   | 4.94887354   | 1E-10      | 5.72E-08 | 5.35E-08 | 284          |
| GOCC_RIBOSOME                                                        | GOCC_RIBOSOME                                                        | GOCC_RIBOSOME                                                        | 52              | 0.707062785   | 4.804897614  | 1E-10      | 5.72E-08 | 5.35E-08 | 294          |
| GOCC_SMALL_RIBOSOMAL_SUBUNIT                                         | GOCC_SMALL_RIBOSOMAL_SUBUNIT                                         | GOCC_SMALL_RIBOSOMAL_SUBUNIT                                         | 24              | 0.740376007   | 3.860681353  | 1E-10      | 5.72E-08 | 5.35E-08 | 274          |
| GOMF_STRUCTURAL_CONSTITUENT_OF_RIBOSOME                              | GOMF_STRUCTURAL_CONSTITUENT_OF_RIBOSOME                              | GOMF_STRUCTURAL_CONSTITUENT_OF_RIBOSOME                              | 50              | 0.753584402   | 5.04737646   | 1E-10      | 5.72E-08 | 5.35E-08 | 284          |
| GOMF_STRUCTURAL_MOLECULE_ACTIVITY                                    | GOMF_STRUCTURAL_MOLECULE_ACTIVITY                                    | GOMF_STRUCTURAL_MOLECULE_ACTIVITY                                    | 77              | 0.439831648   | 3.407863359  | 1E-10      | 5.72E-08 | 5.35E-08 | 284          |
| HP_CENTROCECAL_SCOTOMA                                               | HP_CENTROCECAL_SCOTOMA                                               | HP_CENTROCECAL_SCOTOMA                                               | 10              | -0.929059829  | -2.932944493 | 1E-10      | 5.72E-08 | 5.35E-08 | 94           |
| HP_MITOCHONDRIAL_INHERITANCE                                         | HP_MITOCHONDRIAL_INHERITANCE                                         | HP_MITOCHONDRIAL_INHERITANCE                                         | 12              | -0.896316826  | -2.983663652 | 1E-10      | 5.72E-08 | 5.35E-08 | 94           |
| HP_MITOCHONDRIAL_RESPIRATORY_CHAIN_DEFECTS                           | HP_MITOCHONDRIAL_RESPIRATORY_CHAIN_DEFECTS                           | HP_MITOCHONDRIAL_RESPIRATORY_CHAIN_DEFECTS                           | 10              | -0.929059829  | -2.932944493 | 1E-10      | 5.72E-08 | 5.35E-08 | 94           |
| HP_RAGGED_RED_MUSCLE_FIBERS                                          | HP_RAGGED_RED_MUSCLE_FIBERS                                          | HP_RAGGED_RED_MUSCLE_FIBERS                                          | 16              | -0.809827366  | -2.986223646 | 1E-10      | 5.72E-08 | 5.35E-08 | 94           |
| HP_VENTRICULAR_PREEXCITATION                                         | HP_VENTRICULAR_PREEXCITATION                                         | HP_VENTRICULAR_PREEXCITATION                                         | 11              | -0.9239854577 | -3.016000923 | 1E-10      | 5.72E-08 | 5.35E-08 | 94           |
| HP_CARDIAC_CONDUCTION_ABNORMALITY                                    | HP_CARDIAC_CONDUCTION_ABNORMALITY                                    | HP_CARDIAC_CONDUCTION_ABNORMALITY                                    | 17              | -0.801096005  | -3.046457207 | 1.08E-08   | 5.89E-08 | 5.51E-08 | 94           |
| GOCC_RIBONUCLEOPROTEIN_COMPLEX                                       | GOCC_RIBONUCLEOPROTEIN_COMPLEX                                       | GOCC_RIBONUCLEOPROTEIN_COMPLEX                                       | 126             | 0.340876185   | 3.000522938  | 1.25E-10   | 6.46E-08 | 6.04E-08 | 300          |
| HP_LEBER_OPTIC_ATROPHY                                               | HP_LEBER_OPTIC_ATROPHY                                               | HP_LEBER_OPTIC_ATROPHY                                               | 9               | -0.928266439  | -2.798747854 | 1.46E-10   | 6.6E-08  | 6.17E-08 | 94           |
| HP_RETINAL_ARTERIAL_TORTUOSITY                                       | HP_RETINAL_ARTERIAL_TORTUOSITY                                       | HP_RETINAL_ARTERIAL_TORTUOSITY                                       | 9               | -0.928266439  | -2.798747854 | 1.46E-10   | 6.6E-08  | 6.17E-08 | 94           |
| HP_VASCULAR_TORTUOSITY                                               | HP_VASCULAR_TORTUOSITY                                               | HP_VASCULAR_TORTUOSITY                                               | 9               | -0.928266439  | -2.798747854 | 1.46E-10   | 6.6E-08  | 6.17E-08 | 94           |
| HP_CENTRAL_SCOTOMA                                                   | HP_CENTRAL_SCOTOMA                                                   | HP_CENTRAL_SCOTOMA                                                   | 12              | -0.862542663  | -2.871236061 | 1.62E-10   | 6.86E-08 | 6.42E-08 | 94           |
| GOMF_PROTEIN_FOLDING_CHAPERONE                                       | GOMF_PROTEIN_FOLDING_CHAPERONE                                       | GOMF_PROTEIN_FOLDING_CHAPERONE                                       | 11              | 0.884462171   | 3.298350597  | 1.64E-10   | 6.86E-08 | 6.42E-08 | 20           |
| GOMF_UNFOLDED_PROTEIN_BINDING                                        | GOMF_UNFOLDED_PROTEIN_BINDING                                        | GOMF_UNFOLDED_PROTEIN_BINDING                                        | 22              | 0.713629477   | 3.516814537  | 4.29E-10   | 1.72E-07 | 1.61E-07 | 46           |
| HP_RETINAL_VASCULAR_TORTUOSITY                                       | HP_RETINAL_VASCULAR_TORTUOSITY                                       | HP_RETINAL_VASCULAR_TORTUOSITY                                       | 12              | -0.85274551   | -2.838623249 | 4.88E-10   | 1.9E-07  | 1.77E-07 | 94           |
| GOBP_PROTEIN_FOLDING                                                 | GOBP_PROTEIN_FOLDING                                                 | GOBP_PROTEIN_FOLDING                                                 | 37              | 0.571922162   | 3.48416914   | 1.17E-09   | 4.26E-07 | 3.98E-07 | 46           |
| HP_BLURRED_VISION                                                    | HP_BLURRED_VISION                                                    | HP_BLURRED_VISION                                                    | 12              | -0.842765908  | -2.805403106 | 1.17E-09   | 4.26E-07 | 3.98E-07 | 94           |
| HP_RETINAL_TELANGIECTASIA                                            | HP_RETINAL_TELANGIECTASIA                                            | HP_RETINAL_TELANGIECTASIA                                            | 12              | -0.841923604  | -2.80259924  | 1.29E-09   | 4.54E-07 | 4.25E-07 | 94           |
| HP_SLOW_DECREASE_IN_VISUAL_ACUITY                                    | HP_SLOW_DECREASE_IN_VISUAL_ACUITY                                    | HP_SLOW_DECREASE_IN_VISUAL_ACUITY                                    | 12              | -0.834153744  | -2.776734894 | 2.19E-09   | 4.74E-07 | 6.96E-07 | 94           |
| HP_STROKE_LIKE_EPISODE                                               | HP_STROKE_LIKE_EPISODE                                               | HP_STROKE_LIKE_EPISODE                                               | 8               | -0.927474403  | -2.661982024 | 3.62E-09   | 1.19E-06 | 1.11E-06 | 94           |
| GOBP_DE_NOVO_PROTEIN_FOLDING                                         | GOBP_DE_NOVO_PROTEIN_FOLDING                                         | GOBP_DE_NOVO_PROTEIN_FOLDING                                         | 12              | 0.8405694     | 3.25809812   | 5.54E-09   | 1.77E-06 | 1.66E-06 | 72           |
| HP_OPTIC_NEUROPATHY                                                  | HP_OPTIC_NEUROPATHY                                                  | HP_OPTIC_NEUROPATHY                                                  | 13              | -0.810887064  | -2.779478929 | 8.37E-09   | 2.38E-06 | 2.23E-06 | 94           |
| HP_MITOCHONDRIAL_MYOPATHY                                            | HP_MITOCHONDRIAL_MYOPATHY                                            | HP_MITOCHONDRIAL_MYOPATHY                                            | 15              | -0.784885689  | -2.810036616 | 9.29E-09   | 2.38E-06 | 2.23E-06 | 94           |
| HP_MUSCLE_ABNORMALITY_RELATED_TO_MITOCHONDRIAL_DYSFUNCTION           | HP_MUSCLE_ABNORMALITY_RELATED_TO_MITOCHONDRIAL_DYSFUNCTION           | HP_MUSCLE_ABNORMALITY_RELATED_TO_MITOCHONDRIAL_DYSFUNCTION           | 15              | -0.784885689  | -2.810036616 | 9.29E-09   | 2.38E-06 | 2.23E-06 | 94           |
| HP_ABNORMAL_BRAIN_LACTATE_LEVEL_BY_MRS                               | HP_ABNORMAL_BRAIN_LACTATE_LEVEL_BY_MRS                               | HP_ABNORMAL_BRAIN_LACTATE_LEVEL_BY_MRS                               | 7               | -0.926683717  | -2.537820836 | 1.16E-08   | 2.38E-06 | 2.23E-06 | 94           |
| HP_ABNORMAL_CIRCULATING_CITRULLINE_CONCENTRATION                     | HP_ABNORMAL_CIRCULATING_CITRULLINE_CONCENTRATION                     | HP_ABNORMAL_CIRCULATING_CITRULLINE_CONCENTRATION                     | 7               | -0.926683717  | -2.537820836 | 1.16E-08   | 2.38E-06 | 2.23E-06 | 94           |
| HP_ABNORMAL_CIRCULATING_NON_PROTEINOGENIC_AMINO_ACID_CONCENTRATION   | HP_ABNORMAL_CIRCULATING_NON_PROTEINOGENIC_AMINO_ACID_CONCENTRATION   | HP_ABNORMAL_CIRCULATING_NON_PROTEINOGENIC_AMINO_ACID_CONCENTRATION   | 7               | -0.926683717  | -2.537820836 | 1.16E-08   | 2.38E-06 | 2.23E-06 | 94           |
| HP_ABNORMAL_SPEECH_PROSODY                                           | HP_ABNORMAL_SPEECH_PROSODY                                           | HP_ABNORMAL_SPEECH_PROSODY                                           | 7               | -0.926683717  | -2.537820836 | 1.16E-08   | 2.38E-06 | 2.23E-06 | 94           |
| HP_CONCENTRIC_HYPERTROPHIC_CARDIOMYOPATHY                            | HP_CONCENTRIC_HYPERTROPHIC_CARDIOMYOPATHY                            | HP_CONCENTRIC_HYPERTROPHIC_CARDIOMYOPATHY                            | 7               | -0.926683717  | -2.537820836 | 1.16E-08   | 2.38E-06 | 2.23E-06 | 94           |
| HP_EPISODIC_RESPIRATORY_DISTRESS                                     | HP_EPISODIC_RESPIRATORY_DISTRESS                                     | HP_EPISODIC_RESPIRATORY_DISTRESS                                     | 7               | -0.926683717  | -2.537820836 | 1.16E-08   | 2.38E-06 | 2.23E-06 | 94           |
| HP_FLUCTUATIONS_IN_CONSCIOUSNESS                                     | HP_FLUCTUATIONS_IN_CONSCIOUSNESS                                     | HP_FLUCTUATIONS_IN_CONSCIOUSNESS                                     | 7               | -0.926683717  | -2.537820836 | 1.16E-08   | 2.38E-06 | 2.23E-06 | 94           |
| HP_LACTICACIDURIA                                                    | HP_LACTICACIDURIA                                                    | HP_LACTICACIDURIA                                                    | 7               | -0.926683717  | -2.537820836 | 1.16E-08   | 2.38E-06 | 2.23E-06 | 94           |
| HP_LOW_PLASMA_CITRULLINE                                             | HP_LOW_PLASMA_CITRULLINE                                             | HP_LOW_PLASMA_CITRULLINE                                             | 7               | -0.926683717  | -2.537820836 | 1.16E-08   | 2.38E-06 | 2.23E-06 | 94           |
| HP_MIXED_DEMYELINATING_AND_AXONAL_POLYNEUROPATHY                     | HP_MIXED_DEMYELINATING_AND_AXONAL_POLYNEUROPATHY                     | HP_MIXED_DEMYELINATING_AND_AXONAL_POLYNEUROPATHY                     | 7               | -0.926683717  | -2.537820836 | 1.16E-08   | 2.38E-06 | 2.23E-06 | 94           |
| HP_MULTIPLE_GLOMERULAR_CYSTS                                         | HP_MULTIPLE_GLOMERULAR_CYSTS                                         | HP_MULTIPLE_GLOMERULAR_CYSTS                                         | 7               | -0.926683717  | -2.537820836 | 1.16E-08   | 2.38E-06 | 2.23E-06 | 94           |
| HP_NEPHROPATHY                                                       | HP_NEPHROPATHY                                                       | HP_NEPHROPATHY                                                       | 7               | -0.926683717  | -2.537820836 | 1.16E-08   | 2.38E-06 | 2.23E-06 | 94           |
| HP_PSYCHOTIC_MENTATION                                               | HP_PSYCHOTIC_MENTATION                                               | HP_PSYCHOTIC_MENTATION                                               | 7               | -0.926683717  | -2.537820836 | 1.16E-08   | 2.38E-06 | 2.23E-06 | 94           |
| HP_RECURRENT_PANCREATITIS                                            | HP_RECURRENT_PANCREATITIS                                            | HP_RECURRENT_PANCREATITIS                                            | 7               | -0.926683717  | -2.537820836 | 1.16E-08   | 2.38E-06 | 2.23E-06 | 94           |
| HP_STUTTERING                                                        | HP_STUTTERING                                                        | HP_STUTTERING                                                        | 7               | -0.926683717  | -2.537820836 | 1.16E-08   | 2.38E-06 | 2.23E-06 | 94           |
| HP_WIDENED_CEREBRAL_SUBARACHNOID_SPACE                               | HP_WIDENED_CEREBRAL_SUBARACHNOID_SPACE                               | HP_WIDENED_CEREBRAL_SUBARACHNOID_SPACE                               | 7               | -0.926683717  | -2.537820836 | 1.16E-08   | 2.38E-06 | 2.23E-06 | 94           |
| GOBP_CHAPERONE_COFACTOR_DEPENDENT_PROTEIN_REFOLDING                  | GOBP_CHAPERONE_COFACTOR_DEPENDENT_PROTEIN_REFOLDING                  | GOBP_CHAPERONE_COFACTOR_DEPENDENT_PROTEIN_REFOLDING                  | 10              | 0.860257267   | 3.02218639   | 1.32E-08   | 2.66E-06 | 2.49E-06 | 72           |
| GOBP_CHAPERONE_MEDIATED_PROTEIN_FOLDING                              | GOBP_CHAPERONE_MEDIATED_PROTEIN_FOLDING                              | GOBP_CHAPERONE_MEDIATED_PROTEIN_FOLDING                              | 15              | 0.773459892   | 3.264136444  | 1.39E-08   | 2.72E-06 | 2.55E-06 | 72           |
| GOBP_CELLULAR_AMIDE_METABOLIC_PROCESS                                | GOBP_CELLULAR_AMIDE_METABOLIC_PROCESS                                | GOBP_CELLULAR_AMIDE_METABOLIC_PROCESS                                | 130             | 0.307968225   | 2.699574762  | 1.4E-08    | 2.72E-06 | 2.55E-06 | 302          |
| HP_EPISODIC_VOMITING                                                 | HP_EPISODIC_VOMITING                                                 | HP_EPISODIC_VOMITING                                                 | 15              | -0.779681852  | -2.791405201 | 1.53E-08   | 2.91E-06 | 2.72E-06 | 152          |
| HP_ABNORMALITY_OF_THE_THENAR_EMINENCE                                | HP_ABNORMALITY_OF_THE_THENAR_EMINENCE                                | HP_ABNORMALITY_OF_THE_THENAR_EMINENCE                                | 14              | 0.777015437   | 3.140897811  | 1.91E-08   | 3.15E-06 | 2.95E-06 | 274          |
| HP_ADENOCARCINOMA_OF_THE_COLON                                       | HP_ADENOCARCINOMA_OF_THE_COLON                                       | HP_ADENOCARCINOMA_OF_THE_COLON                                       | 14              | 0.777015437   | 3.140897811  | 1.91E-08   | 3.15E-06 | 2.95E-06 | 274          |
| HP_ERYTHROID_HYPOPLASIA                                              | HP_ERYTHROID_HYPOPLASIA                                              | HP_ERYTHROID_HYPOPLASIA                                              | 14              | 0.777015437   | 3.140897811  | 1.91E-08   | 3.15E-06 | 2.95E-06 | 274          |
| HP_MALIGNANT_GENITOURINARY_TRACT_TUMOR                               | HP_MALIGNANT_GENITOURINARY_TRACT_TUMOR                               | HP_MALIGNANT_GENITOURINARY_TRACT_TUMOR                               | 14              | 0.777015437   | 3.140897811  | 1.91E-08   | 3.15E-06 | 2.95E-06 | 274          |
| HP_OSTEOSARCOMA                                                      | HP_OSTEOSARCOMA                                                      | HP_OSTEOSARCOMA                                                      | 14              | 0.777015437   | 3.140897811  | 1.91E-08   | 3.15E-06 | 2.95E-06 | 274          |
| HP_PARTIAL_DUPLICATION_OF_THE_PHALANX_OF_HAND                        | HP_PARTIAL_DUPLICATION_OF_THE_PHALANX_OF_HAND                        | HP_PARTIAL_DUPLICATION_OF_THE_PHALANX_OF_HAND                        | 14              | 0.777015437   | 3.140897811  | 1.91E-08   | 3.15E-06 | 2.95E-06 | 274          |
| HP_PERSISTENCE_OF_HEMOGLOBIN_F                                       | HP_PERSISTENCE_OF_HEMOGLOBIN_F                                       | HP_PERSISTENCE_OF_HEMOGLOBIN_F                                       | 14              | 0.777015437   | 3.140897811  | 1.91E-08   | 3.15E-06 | 2.95E-06 | 274          |
| HP_PURE_RED_CELL_APLASIA                                             | HP_PURE_RED_CELL_APLASIA                                             | HP_PURE_RED_CELL_APLASIA                                             | 14              | 0.777015437   | 3.140897811  | 1.91E-08   | 3.15E-06 | 2.95E-06 | 274          |
| HP_RETICULOCYTOPENIA                                                 | HP_RETICULOCYTOPENIA                                                 | HP_RETICULOCYTOPENIA                                                 | 14              | 0.777015437   | 3.140897811  | 1.91E-08   | 3.15E-06 | 2.95E-06 | 274          |
| GOBP_ORGANONITROGEN_COMPOUND_BIOSYNTHETIC_PROCESS                    | GOBP_ORGANONITROGEN_COMPOUND_BIOSYNTHETIC_PROCESS                    | GOBP_ORGANONITROGEN_COMPOUND_BIOSYNTHETIC_PROCESS                    | 176             | 0.259490562   | 2.427707667  | 2.2E-08    | 3.57E-06 | 3.34E-06 | 302          |
| HP_ABNORMAL_MUSCLE_FIBER_MORPHOLOGY                                  | HP_ABNORMAL_MUSCLE_FIBER_MORPHOLOGY                                  | HP_ABNORMAL_MUSCLE_FIBER_MORPHOLOGY                                  | 24              | -0.66025135   | -2.766600773 | 3.32E-08   | 5.3E-06  | 4.96E-06 | 137          |
| HP_ABNORMAL_MITOCHONDRIA_IN_MUSCLE_TISSUE                            | HP_ABNORMAL_MITOCHONDRIA_IN_MUSCLE_TISSUE                            | HP_ABNORMAL_MITOCHONDRIA_IN_MUSCLE_TISSUE                            | 12              | -0.801556784  | -2.668225981 | 3.73E-08   | 5.8E-06  | 5.42E-06 | 94           |
| HP_PROXIMAL_TUBULOPATHY                                              | HP_PROXIMAL_TUBULOPATHY                                              | HP_PROXIMAL_TUBULOPATHY                                              | 12              | -0.801556784  | -2.668225981 | 3.73E-08   | 5.8E-06  | 5.42E-06 | 94           |
| GOBP_CELLULAR_MACROMOLECULE_BIOSYNTHETIC_PROCESS                     | GOBP_CELLULAR_MACROMOLECULE_BIOSYNTHETIC_PROCESS                     | GOBP_CELLULAR_MACROMOLECULE_BIOSYNTHETIC_PROCESS                     | 178             | 0.258778732   | 2.412620446  | 4.39E-08   | 6.72E-06 | 6.29E-06 | 302          |
| HP_INCREASED_CSF_LACTATE                                             | HP_INCREASED_CSF_LACTATE                                             | HP_INCREASED_CSF_LACTATE                                             | 14              | -0.767581938  | -2.705129605 | 4.87E-08   | 7.36E-06 | 6.88E-06 | 94           |
| GOMF_ELECTRON_TRANSFER_ACTIVITY                                      | GOMF_ELECTRON_TRANSFER_ACTIVITY                                      | GOMF_ELECTRON_TRANSFER_ACTIVITY                                      | 21              | -0.674980062  | -2.720658552 | 5.49E-08   | 8.17E-06 | 7.64E-06 | 94           |
| GOCC_RESPIRASOME                                                     | GOCC_RESPIRASOME                                                     | GOCC_RESPIRASOME                                                     | 21              | -0.6738992514 | -2.716474627 | 5.63E-08   | 8.28E-06 | 7.74E-06 | 94           |
| GOMF_C3HC4_TYPE_RING_FINGER_DOMAIN_BINDING                           | GOMF_C3HC4_TYPE_RING_FINGER_DOMAIN_BINDING                           | GOMF_C3HC4_TYPE_RING_FINGER_DOMAIN_BINDING                           | 4               | 0.988945578   | 2.279235337  | 7E-08      | 1.01E-05 | 9.49E-06 | 17           |
| HP_PROGRESSIVE_SENSORINEURAL_HEARING_IMPAIRMENT                      | HP_PROGRESSIVE_SENSORINEURAL_HEARING_IMPAIRMENT                      | HP_PROGRESSIVE_SENSORINEURAL_HEARING_IMPAIRMENT                      | 8               | -0.895846625  | -2.571205851 | 7.14E-08   | 1.02E-05 | 9.55E-06 | 49           |
| HP_VENTRICULAR_ARRHYTHMIA                                            | HP_VENTRICULAR_ARRHYTHMIA                                            | HP_VENTRICULAR_ARRHYTHMIA                                            | 17              | -0.73061158   | -2.778414694 | 7.42E-08   | 1.05E-05 | 9.8E-06  | 94           |
| HP_SPRENGEL_ANOMALY                                                  | HP_SPRENGEL_ANOMALY                                                  | HP_SPRENGEL_ANOMALY                                                  | 15              | 0.747639485   | 3.155169708  | 7.51E-08   | 1.05E-05 | 9.8E-06  | 309          |
| HP_SCOTOMA                                                           | HP_SCOTOMA                                                           | HP_SCOTOMA                                                           | 15              | -0.760105604  | -2.721318611 | 8.23E-08   | 1.13E-05 | 1.06E-05 | 94           |
| GOMF_PRIMARY_ACTIVE_TRANSMEMBRANE_TRANSPORTER_ACTIVITY               | GOMF_PRIMARY_ACTIVE_TRANSMEMBRANE_TRANSPORTER_ACTIVITY               | GOMF_PRIMARY_ACTIVE_TRANSMEMBRANE_TRANSPORTER_ACTIVITY               | 23              | -0.661902244  | -2.774123204 | 9.76E-08   | 1.33E-05 | 1.24E-05 | 94           |
| GOMF_OXIDOREDUCTION_DRIVEN_ACTIVE_TRANSMEMBRANE_TRANSPORTER_ACTIVITY | GOMF_OXIDOREDUCTION_DRIVEN_ACTIVE_TRANSMEMBRANE_TRANSPORTER_ACTIVITY | GOMF_OXIDOREDUCTION_DRIVEN_ACTIVE_TRANSMEMBRANE_TRANSPORTER_ACTIVITY | 20              | -0.690838085  | -2.752785118 | 1.22E-07   | 1.64E-05 | 1.53E-05 | 94           |
| HP_ABNORMAL_CSF_METABOLITE_LEVEL                                     | HP_ABNORMAL_CSF_METABOLITE_LEVEL                                     | HP_ABNORMAL_CSF_METABOLITE_LEVEL                                     | 16              | -0.727680089  | -2.683307059 | 1.37E-07   | 1.82E-05 | 1.7E-05  | 125          |
| HP_PROGRESSIVE_EXTERNAL_OPHTHALMOPLEGIA                              | HP_PROGRESSIVE_EXTERNAL_OPHTHALMOPLEGIA                              | HP_PROGRESSIVE_EXTERNAL_OPHTHALMOPLEGIA                              | 10              | -0.836937804  | -2.642124917 | 1.47E-07   | 1.93E-05 | 1.81E-05 | 94           |
| HP_PIGMENTARY_RETINOPATHY                                            | HP_PIGMENTARY_RETINOPATHY                                            | HP_PIGMENTARY_RETINOPATHY                                            | 16              | -0.725369073  | -2.67478523  | 1.63E-07   | 2.11E-05 | 1.97E-05 | 94           |
| HP_DUPLICATION_OF_THUMB_PHALANX                                      | HP_DUPLICATION_OF_THUMB_PHALANX                                      | HP_DUPLICATION_OF_THUMB_PHALANX                                      | 7               | 0.716625794   | 3.107951514  | 1.76E-07   | 2.25E-05 | 2.1E-05  | 274          |
| HP_BASAL_GANGLIA_CALCIFICATION                                       | HP_BASAL_GANGLIA_CALCIFICATION                                       | HP_BASAL_GANGLIA_CALCIFICATION                                       | 8               | -0.880686505  | -2.528216539 | 2.08E-07   | 2.63E-05 | 2.46E-05 | 94           |
| HP_VITILIGO                                                          | HP_VITILIGO                                                          | HP_VITILIGO                                                          | 8               | -0.878821225  | -2.52234056  | 2.72E-07   | 3.39E-05 | 3.17E-05 | 94           |
| HP_EPILEPTIC_SPASM                                                   | HP_EPILEPTIC_SPASM                                                   | HP_EPILEPTIC_SPASM                                                   | 28              | -0.603363459  | -2.652768863 | 2.83E-07   | 3.39E-05 | 3.17E-05 | 242          |
| HP_ABNORMAL_RETICULOCYTE_MORPHOLOGY                                  | HP_ABNORMAL_RETICULOCYTE_MORPHOLOGY                                  | HP_ABNORMAL_RETICULOCYTE_MORPHOLOGY                                  | 7               | 0.709258143   | 3.075998574  | 2.85E-07   | 3.39E-05 | 3.17E-05 | 274          |
| HP_ABNORMALITY_OF_THE_MITOCHONDRION                                  | HP_ABNORMALITY_OF_THE_MITOCHONDRION                                  | HP_ABNORMALITY_OF_THE_MITOCHONDRION                                  | 23              | -0.647032802  | -2.711803331 | 2.89E-07</ |          |          |              |

|                                                                      |                                                                      |                                                                      |     |              |              |          |          |          |     |
|----------------------------------------------------------------------|----------------------------------------------------------------------|----------------------------------------------------------------------|-----|--------------|--------------|----------|----------|----------|-----|
| HP_PHENOTYPIC_VARIABILITY                                            | HP_PHENOTYPIC_VARIABILITY                                            | HP_PHENOTYPIC_VARIABILITY                                            | 38  | -0.516745819 | -2.524437764 | 2.84E-06 | 0.000224 | 0.000209 | 160 |
| HP_ABNORMAL_CIRCULATING_PYRUVATE_FAMILY_AMINO_ACID_CONCENTRATION     | HP_ABNORMAL_CIRCULATING_PYRUVATE_FAMILY_AMINO_ACID_CONCENTRATION     | HP_ABNORMAL_CIRCULATING_PYRUVATE_FAMILY_AMINO_ACID_CONCENTRATION     | 9   | -0.812344378 | -2.449239776 | 2.85E-06 | 0.000224 | 0.000209 | 94  |
| GOBP_AEROBIC_RESPIRATION                                             | GOBP_AEROBIC_RESPIRATION                                             | GOBP_AEROBIC_RESPIRATION                                             | 30  | -0.563862461 | -2.543871352 | 3.25E-06 | 0.000254 | 0.000238 | 94  |
| HP_APHASIA                                                           | HP_APHASIA                                                           | HP_APHASIA                                                           | 27  | -0.569126406 | -2.465024783 | 3.46E-06 | 0.000268 | 0.000251 | 177 |
| HP_ENCEPHALOPATHY                                                    | HP_ENCEPHALOPATHY                                                    | HP_ENCEPHALOPATHY                                                    | 96  | -0.519322986 | -2.503471852 | 3.63E-06 | 0.000280 | 0.000262 | 139 |
| HP_ABNORMAL_URINE_PH                                                 | HP_ABNORMAL_URINE_PH                                                 | HP_ABNORMAL_URINE_PH                                                 | 9   | -0.806044112 | -2.430244307 | 3.7E-06  | 0.000283 | 0.000264 | 113 |
| HP_SEVERE_GLOBAL_DEVELOPMENTAL_DELAY                                 | HP_SEVERE_GLOBAL_DEVELOPMENTAL_DELAY                                 | HP_SEVERE_GLOBAL_DEVELOPMENTAL_DELAY                                 | 22  | -0.599697112 | -2.458833015 | 3.8E-06  | 0.000287 | 0.000268 | 94  |
| HP_GENERALIZED_ONSET_SEIZURE                                         | HP_GENERALIZED_ONSET_SEIZURE                                         | HP_GENERALIZED_ONSET_SEIZURE                                         | 40  | -0.501252958 | -2.526124061 | 3.81E-06 | 0.000287 | 0.000268 | 242 |
| HP_PROGRESSIVE_VISUAL_LOSS                                           | HP_PROGRESSIVE_VISUAL_LOSS                                           | HP_PROGRESSIVE_VISUAL_LOSS                                           | 17  | -0.668355566 | -2.541664053 | 4.31E-06 | 0.000323 | 0.000302 | 94  |
| HP_NAUSEA_AND_VOMITING                                               | HP_NAUSEA_AND_VOMITING                                               | HP_NAUSEA_AND_VOMITING                                               | 49  | -0.465948915 | -2.468988463 | 4.63E-06 | 0.000344 | 0.000322 | 361 |
| GOBP_CELLULAR_RESPIRATION                                            | GOBP_CELLULAR_RESPIRATION                                            | GOBP_CELLULAR_RESPIRATION                                            | 32  | -0.539657856 | -2.478913791 | 4.91E-06 | 0.000360 | 0.000337 | 94  |
| HP_VARIABLE_EXPRESSIVITY                                             | HP_VARIABLE_EXPRESSIVITY                                             | HP_VARIABLE_EXPRESSIVITY                                             | 26  | -0.580775608 | -2.483369867 | 4.92E-06 | 0.000360 | 0.000337 | 160 |
| HP_ELEVATED_PULMONARY_ARTERY_PRESSURE                                | HP_ELEVATED_PULMONARY_ARTERY_PRESSURE                                | HP_ELEVATED_PULMONARY_ARTERY_PRESSURE                                | 17  | -0.665064276 | -2.529147373 | 4.94E-06 | 0.000360 | 0.000337 | 211 |
| HP_PROGRESSIVE_HEARING_IMPAIRMENT                                    | HP_PROGRESSIVE_HEARING_IMPAIRMENT                                    | HP_PROGRESSIVE_HEARING_IMPAIRMENT                                    | 10  | -0.77824601  | -2.456841076 | 5.04E-06 | 0.000365 | 0.000341 | 123 |
| HP_ERYTHEMA                                                          | HP_ERYTHEMA                                                          | HP_ERYTHEMA                                                          | 14  | -0.701015239 | -2.47053374  | 5.84E-06 | 0.000420 | 0.000393 | 214 |
| HP_LACTIC_ACIDOSIS                                                   | HP_LACTIC_ACIDOSIS                                                   | HP_LACTIC_ACIDOSIS                                                   | 21  | -0.603546189 | -2.432907138 | 5.98E-06 | 0.000427 | 0.000400 | 94  |
| HP_FEVER                                                             | HP_FEVER                                                             | HP_FEVER                                                             | 52  | -0.455122669 | -2.448259884 | 6.13E-06 | 0.000435 | 0.000407 | 277 |
| GOCC_POLYSOME                                                        | GOCC_POLYSOME                                                        | GOCC_POLYSOME                                                        | 20  | 0.5956009422 | 2.848260249  | 6.25E-06 | 0.000441 | 0.000413 | 294 |
| HP_ABSENT_THUMB                                                      | HP_ABSENT_THUMB                                                      | HP_ABSENT_THUMB                                                      | 15  | 0.671179011  | 2.83507213   | 6.29E-06 | 0.000441 | 0.000413 | 274 |
| HP_PANCREATITIS                                                      | HP_PANCREATITIS                                                      | HP_PANCREATITIS                                                      | 12  | -0.714000292 | -2.376767519 | 6.57E-06 | 0.000458 | 0.000428 | 114 |
| GOBP_RESPONSE_TO_HEAT                                                | GOBP_RESPONSE_TO_HEAT                                                | GOBP_RESPONSE_TO_HEAT                                                | 15  | 0.668894683  | 2.82825918   | 6.94E-06 | 0.000480 | 0.000449 | 20  |
| HP_ABNORMAL_CARDIAC_VENTRICULAR_FUNCTION                             | HP_ABNORMAL_CARDIAC_VENTRICULAR_FUNCTION                             | HP_ABNORMAL_CARDIAC_VENTRICULAR_FUNCTION                             | 11  | -0.750152794 | -2.43313479  | 7.39E-06 | 0.000503 | 0.000470 | 49  |
| HP_ABNORMAL_BASAL_GANGLIA_MRI_SIGNAL_INTENSITY                       | HP_ABNORMAL_BASAL_GANGLIA_MRI_SIGNAL_INTENSITY                       | HP_ABNORMAL_BASAL_GANGLIA_MRI_SIGNAL_INTENSITY                       | 10  | -0.771607034 | -2.435862525 | 7.4E-06  | 0.000503 | 0.000470 | 94  |
| HP_FOCAL_T2_HYPERINTENSE_BASAL_GANGLIA_LESION                        | HP_FOCAL_T2_HYPERINTENSE_BASAL_GANGLIA_LESION                        | HP_FOCAL_T2_HYPERINTENSE_BASAL_GANGLIA_LESION                        | 10  | -0.771607034 | -2.435862525 | 7.4E-06  | 0.000503 | 0.000470 | 94  |
| HP_TYPE_II_DIABETES_MELLITUS                                         | HP_TYPE_II_DIABETES_MELLITUS                                         | HP_TYPE_II_DIABETES_MELLITUS                                         | 13  | -0.710317801 | -2.4347575   | 7.65E-06 | 0.000516 | 0.000483 | 94  |
| HP_GENERALIZED_ONSET_MOTOR_SEIZURE                                   | HP_GENERALIZED_ONSET_MOTOR_SEIZURE                                   | HP_GENERALIZED_ONSET_MOTOR_SEIZURE                                   | 27  | -0.553366443 | -2.396764554 | 7.74E-06 | 0.000519 | 0.000485 | 242 |
| HP_ABNORMALITY_OF_THE_BASAL_GANGLIA                                  | HP_ABNORMALITY_OF_THE_BASAL_GANGLIA                                  | HP_ABNORMALITY_OF_THE_BASAL_GANGLIA                                  | 29  | -0.554834894 | -2.47838978  | 7.82E-06 | 0.000521 | 0.000488 | 234 |
| GOBP_ENERGY_DERIVATION_BY_OXIDATION_OF_ORGANIC_COMPOUNDS             | GOBP_ENERGY_DERIVATION_BY_OXIDATION_OF_ORGANIC_COMPOUNDS             | GOBP_ENERGY_DERIVATION_BY_OXIDATION_OF_ORGANIC_COMPOUNDS             | 38  | -0.501992741 | -2.452365138 | 8.26E-06 | 0.000547 | 0.000512 | 94  |
| HP_GLOMERULAR_SCLEROSIS                                              | HP_GLOMERULAR_SCLEROSIS                                              | HP_GLOMERULAR_SCLEROSIS                                              | 11  | -0.747273826 | -2.423736801 | 8.86E-06 | 0.000583 | 0.000546 | 94  |
| HP_ADENOCARCINOMA_OF_THE_INTESTINES                                  | HP_ADENOCARCINOMA_OF_THE_INTESTINES                                  | HP_ADENOCARCINOMA_OF_THE_INTESTINES                                  | 15  | 0.662563804  | 2.796135496  | 9.52E-06 | 0.000622 | 0.000581 | 94  |
| HP_MYOPATHY                                                          | HP_MYOPATHY                                                          | HP_MYOPATHY                                                          | 31  | -0.527997349 | -2.409382815 | 9.55E-06 | 0.000623 | 0.000581 | 275 |
| HP_ABNORMAL_CIRCULATING_PROTEINOGENIC_AMINO_ACID_DERIVATIVE_CONCENTR | HP_ABNORMAL_CIRCULATING_PROTEINOGENIC_AMINO_ACID_DERIVATIVE_CONCENTR | HP_ABNORMAL_CIRCULATING_PROTEINOGENIC_AMINO_ACID_DERIVATIVE_CONCENTR | 10  | -0.767250623 | -2.422130422 | 1E-05    | 0.000646 | 0.000604 | 94  |
| HP_ABNORMALITY_OF_RETINAL_PIGMENTATION                               | HP_ABNORMALITY_OF_RETINAL_PIGMENTATION                               | HP_ABNORMALITY_OF_RETINAL_PIGMENTATION                               | 25  | -0.574755519 | -2.435939577 | 1E-05    | 0.000649 | 0.000604 | 94  |
| HP_ABNORMAL_RENAL_TUBULE_MORPHOLOGY                                  | HP_ABNORMAL_RENAL_TUBULE_MORPHOLOGY                                  | HP_ABNORMAL_RENAL_TUBULE_MORPHOLOGY                                  | 10  | -0.765902739 | -2.417874664 | 1.03E-05 | 0.000661 | 0.000618 | 94  |
| HP_RETINAL_DYSTROPHY                                                 | HP_RETINAL_DYSTROPHY                                                 | HP_RETINAL_DYSTROPHY                                                 | 22  | -0.584379731 | -2.396029839 | 1.11E-05 | 0.000702 | 0.000657 | 94  |
| HP_VOMITING                                                          | HP_VOMITING                                                          | HP_VOMITING                                                          | 32  | -0.524641584 | -2.409936675 | 1.12E-05 | 0.000708 | 0.000662 | 152 |
| HP_VISUAL_LOSS                                                       | HP_VISUAL_LOSS                                                       | HP_VISUAL_LOSS                                                       | 32  | -0.523526782 | -2.404815838 | 1.16E-05 | 0.000728 | 0.000681 | 125 |
| HP_HYPOPARATHYROIDISM                                                | HP_HYPOPARATHYROIDISM                                                | HP_HYPOPARATHYROIDISM                                                | 12  | -0.69907621  | -2.327088164 | 1.22E-05 | 0.000759 | 0.000710 | 94  |
| GOBP_RESPONSE_TO ABIOTIC STIMULUS                                    | GOBP_RESPONSE_TO ABIOTIC STIMULUS                                    | GOBP_RESPONSE_TO ABIOTIC STIMULUS                                    | 96  | 0.295304081  | 2.463990789  | 1.23E-05 | 0.000761 | 0.000712 | 82  |
| HP_DEMYELINATING_PERIPHERAL_NEUROPATHY                               | HP_DEMYELINATING_PERIPHERAL_NEUROPATHY                               | HP_DEMYELINATING_PERIPHERAL_NEUROPATHY                               | 11  | -0.740422688 | -2.401575007 | 1.23E-05 | 0.000761 | 0.000712 | 143 |
| HP_POLYNEUROPATHY                                                    | HP_POLYNEUROPATHY                                                    | HP_POLYNEUROPATHY                                                    | 19  | -0.628702925 | -2.459834875 | 1.33E-05 | 0.000815 | 0.000763 | 125 |
| GOCC_OXIDOREDUCTASE_COMPLEX                                          | GOCC_OXIDOREDUCTASE_COMPLEX                                          | GOCC_OXIDOREDUCTASE_COMPLEX                                          | 18  | -0.632359305 | -2.45580702  | 1.4E-05  | 0.000859 | 0.000802 | 94  |
| HP_ACTION_TREMOR                                                     | HP_ACTION_TREMOR                                                     | HP_ACTION_TREMOR                                                     | 28  | -0.54094485  | -2.378337026 | 1.44E-05 | 0.000875 | 0.000818 | 143 |
| HP_SENSORY_NEUROPATHY                                                | HP_SENSORY_NEUROPATHY                                                | HP_SENSORY_NEUROPATHY                                                | 14  | -0.682791028 | -2.406307566 | 1.46E-05 | 0.000882 | 0.000825 | 94  |
| HP_ABNORMAL_MEAN_CORPUSCULAR_VOLUME                                  | HP_ABNORMAL_MEAN_CORPUSCULAR_VOLUME                                  | HP_ABNORMAL_MEAN_CORPUSCULAR_VOLUME                                  | 16  | 0.624112288  | 2.706773419  | 1.52E-05 | 0.000906 | 0.000847 | 274 |
| HP_INCREASED_MEAN_CORPUSCULAR_VOLUME                                 | HP_INCREASED_MEAN_CORPUSCULAR_VOLUME                                 | HP_INCREASED_MEAN_CORPUSCULAR_VOLUME                                 | 16  | 0.62412288   | 2.706773419  | 1.52E-05 | 0.000906 | 0.000847 | 274 |
| HP_HEMIPARESIS                                                       | HP_HEMIPARESIS                                                       | HP_HEMIPARESIS                                                       | 14  | -0.680469895 | -2.398127375 | 1.58E-05 | 0.000940 | 0.000878 | 211 |
| HP_SENSORIMOTOR_NEUROPATHY                                           | HP_SENSORIMOTOR_NEUROPATHY                                           | HP_SENSORIMOTOR_NEUROPATHY                                           | 20  | -0.617954153 | -2.46236424  | 1.59E-05 | 0.000942 | 0.000881 | 143 |
| HP_INTESTINAL_PSEUDO_OBSTRUCTION                                     | HP_INTESTINAL_PSEUDO_OBSTRUCTION                                     | HP_INTESTINAL_PSEUDO_OBSTRUCTION                                     | 10  | -0.758870596 | -2.395674925 | 1.64E-05 | 0.000960 | 0.000898 | 159 |
| HP_DYSTONIA                                                          | HP_DYSTONIA                                                          | HP_DYSTONIA                                                          | 47  | -0.457725795 | -2.391487509 | 1.64E-05 | 0.000960 | 0.000898 | 242 |
| GOBP_REGULATION_OF_CELL_DEATH                                        | GOBP_REGULATION_OF_CELL_DEATH                                        | GOBP_REGULATION_OF_CELL_DEATH                                        | 153 | 0.229949439  | 2.080227051  | 1.81E-05 | 0.001055 | 0.000986 | 57  |
| HP_ABNORMAL_NUMBER_OF_ERYTHROID_PRECURSORS                           | HP_ABNORMAL_NUMBER_OF_ERYTHROID_PRECURSORS                           | HP_ABNORMAL_NUMBER_OF_ERYTHROID_PRECURSORS                           | 15  | 0.647707835  | 2.733440704  | 1.91E-05 | 0.001101 | 0.001030 | 274 |
| HP_NORMOCHROMIC_ANEMIA                                               | HP_NORMOCHROMIC_ANEMIA                                               | HP_NORMOCHROMIC_ANEMIA                                               | 15  | 0.647707835  | 2.733440704  | 1.91E-05 | 0.001101 | 0.001030 | 274 |
| GOBP_ION_TRANSMEMBRANE_TRANSPORT                                     | GOBP_ION_TRANSMEMBRANE_TRANSPORT                                     | GOBP_ION_TRANSMEMBRANE_TRANSPORT                                     | 57  | -0.416172229 | -2.297654288 | 1.93E-05 | 0.001101 | 0.001030 | 170 |
| HP_MANIA                                                             | HP_MANIA                                                             | HP_MANIA                                                             | 12  | -0.687913658 | -2.289932028 | 1.93E-05 | 0.001101 | 0.001030 | 94  |
| GOBP_CATION_TRANSMEMBRANE_TRANSPORT                                  | GOBP_CATION_TRANSMEMBRANE_TRANSPORT                                  | GOBP_CATION_TRANSMEMBRANE_TRANSPORT                                  | 52  | -0.436885089 | -2.350153731 | 2.11E-05 | 0.001194 | 0.001171 | 170 |
| HP_BULBAR_SIGNS                                                      | HP_BULBAR_SIGNS                                                      | HP_BULBAR_SIGNS                                                      | 11  | -0.726696336 | -2.357053325 | 2.22E-05 | 0.001252 | 0.001171 | 210 |
| HP_FOCAL_ONSET_SEIZURE                                               | HP_FOCAL_ONSET_SEIZURE                                               | HP_FOCAL_ONSET_SEIZURE                                               | 36  | -0.494250653 | -2.382807034 | 2.27E-05 | 0.001271 | 0.001189 | 242 |
| GOBP_PROGRAMMED_CELL_DEATH                                           | GOBP_PROGRAMMED_CELL_DEATH                                           | GOBP_PROGRAMMED_CELL_DEATH                                           | 186 | 0.210697528  | 1.984854075  | 2.28E-05 | 0.001271 | 0.001189 | 98  |
| HP_ABNORMALITY_OF_CARDIOVASCULAR_SYSTEM_ELECTROPHYSIOLOGY            | HP_ABNORMALITY_OF_CARDIOVASCULAR_SYSTEM_ELECTROPHYSIOLOGY            | HP_ABNORMALITY_OF_CARDIOVASCULAR_SYSTEM_ELECTROPHYSIOLOGY            | 36  | -0.493582383 | -2.37938554  | 2.42E-05 | 0.001342 | 0.001255 | 94  |
| HP_ABNORMAL_PERIPHERAL_MYELINATION                                   | HP_ABNORMAL_PERIPHERAL_MYELINATION                                   | HP_ABNORMAL_PERIPHERAL_MYELINATION                                   | 19  | -0.616605071 | -2.412501356 | 2.43E-05 | 0.001342 | 0.001255 | 125 |
| HP_ABNORMAL_NEPHRON_MORPHOLOGY                                       | HP_ABNORMAL_NEPHRON_MORPHOLOGY                                       | HP_ABNORMAL_NEPHRON_MORPHOLOGY                                       | 22  | -0.572650117 | -2.347936957 | 2.46E-05 | 0.001342 | 0.001256 | 94  |
| HP_ABNORMAL_RENAL_CORTX_MORPHOLOGY                                   | HP_ABNORMAL_RENAL_CORTX_MORPHOLOGY                                   | HP_ABNORMAL_RENAL_CORTX_MORPHOLOGY                                   | 22  | -0.57278348  | -2.348483763 | 2.46E-05 | 0.001342 | 0.001256 | 94  |
| GOBP_INORGANIC_ION_TRANSMEMBRANE_TRANSPORT                           | GOBP_INORGANIC_ION_TRANSMEMBRANE_TRANSPORT                           | GOBP_INORGANIC_ION_TRANSMEMBRANE_TRANSPORT                           | 49  | -0.440432098 | -2.333778947 | 2.5E-05  | 0.001353 | 0.001265 | 170 |
| GOBP_CELLULAR_RESPONSE_TO_HEAT                                       | GOBP_CELLULAR_RESPONSE_TO_HEAT                                       | GOBP_CELLULAR_RESPONSE_TO_HEAT                                       | 11  | 0.707238483  | 2.629448906  | 2.5E-05  | 0.001353 | 0.001265 | 20  |
| HP_ABNORMAL_GASTROINTESTINAL_MOTILITY                                | HP_ABNORMAL_GASTROINTESTINAL_MOTILITY                                | HP_ABNORMAL_GASTROINTESTINAL_MOTILITY                                | 13  | -0.683963358 | -2.344422333 | 2.54E-05 | 0.001369 | 0.001280 | 210 |
| HP_ABNORMALITY_OF_TEMPERATURE_REGULATION                             | HP_ABNORMALITY_OF_TEMPERATURE_REGULATION                             | HP_ABNORMALITY_OF_TEMPERATURE_REGULATION                             | 60  | -0.414472579 | -2.321603697 | 2.57E-05 | 0.001374 | 0.001285 | 167 |
| HP_ABNORMALITY_OF_THE_MUSCULATURE_OF_THE_HAND                        | HP_ABNORMALITY_OF_THE_MUSCULATURE_OF_THE_HAND                        | HP_ABNORMALITY_OF_THE_MUSCULATURE_OF_THE_HAND                        | 19  | 0.56110468   | 2.636699428  | 2.66E-05 | 0.00142  | 0.001328 | 302 |
| HP_DILATED_CARDIOMYOPATHY                                            | HP_DILATED_CARDIOMYOPATHY                                            | HP_DILATED_CARDIOMYOPATHY                                            | 20  | -0.606877925 | -2.417431814 | 2.77E-05 | 0.001468 | 0.001373 | 94  |
| HP_ABNORMALITY_OF_THE_OPTIC_NERVE                                    | HP_ABNORMALITY_OF_THE_OPTIC_NERVE                                    | HP_ABNORMALITY_OF_THE_OPTIC_NERVE                                    | 74  | -0.3766465   | -2.20312471  | 2.95E-05 | 0.001555 | 0.001455 | 177 |
| HP_MYOCLONIUS                                                        | HP_MYOCLONIUS                                                        | HP_MYOCLONIUS                                                        | 35  | -0.483912177 | -2.310057233 | 3.06E-05 | 0.001606 | 0.001502 | 320 |
| HP_PERSONALITY_CHANGES                                               | HP_PERSONALITY_CHANGES                                               | HP_PERSONALITY_CHANGES                                               | 13  | -0.679166584 | -2.327980422 | 3.09E-05 | 0.001615 | 0.001511 | 94  |
| HP_CEREBRAL_CORTICAL_ATROPHY                                         | HP_CEREBRAL_CORTICAL_ATROPHY                                         | HP_CEREBRAL_CORTICAL_ATROPHY                                         | 44  | -0.45334393  | -2.335618331 | 3.29E-05 | 0.001714 | 0.001603 | 120 |
| GOCC_MEMBRANE_PROTEIN_COMPLEX                                        | GOCC_MEMBRANE_PROTEIN_COMPLEX                                        | GOCC_MEMBRANE_PROTEIN_COMPLEX                                        | 93  | -0.349832105 | -2.161955844 | 3.38E-05 | 0.001751 | 0.001638 | 94  |
| HP_FUNCTIONAL_ABNORMALITY_OF_THE_GASTROINTESTINAL_TRACT              | HP_FUNCTIONAL_ABNORMALITY_OF_THE_GASTROINTESTINAL_TRACT              | HP_FUNCTIONAL_ABNORMALITY_OF_THE_GASTROINTESTINAL_TRACT              | 110 | -0.344454127 | -2.200773892 | 3.48E-05 | 0.001787 | 0.001672 | 431 |
| HP_INCREASED_SERUM_LACTATE                                           | HP_INCREASED_SERUM_LACTATE                                           | HP_INCREASED_SERUM_LACTATE                                           | 23  | -0.563847565 | -2.36232435  | 3.48E-05 | 0.001787 | 0.001672 | 94  |
| GOBP_PROTEIN_REFOLDING                                               | GOBP_PROTEIN_REFOLDING                                               | GOBP_PROTEIN_REFOLDING                                               | 10  | 0.723014157  | 2.540035352  | 3.59E-05 | 0.001829 | 0.001710 | 46  |
| HP_MYOCLONIC_SEIZURE                                                 | HP_MYOCLONIC_SEIZURE                                                 | HP_MYOCLONIC_SEIZURE                                                 | 26  | -0.550134555 | -2.352350149 | 3.6E-05  | 0.001829 | 0.001710 | 114 |
| GOMF_CHAPERONE_BINDING                                               | GOMF_CHAPERONE_BINDING                                               | GOMF_CHAPERONE_BINDING                                               | 18  | 0.584906379  | 2.684359516  | 3.71E-05 | 0.001878 | 0.001757 | 46  |
| HP_ABNORMAL_SUBARACHNOID_SPACE_MORPHOLOGY                            | HP_ABNORMAL_SUBARACHNOID_SPACE_MORPHOLOGY                            | HP_ABNORMAL_SUBARACHNOID_SPACE_MORPHOLOGY                            | 18  | -0.613171128 | -2.381286534 | 3.85E-05 | 0.001929 | 0.001804 | 242 |
| HP_WIDENED_SUBARACHNOID_SPACE                                        | HP_WIDENED_SUBARACHNOID_SPACE                                        | HP_WIDENED_SUBARACHNOID_SPACE                                        | 18  | -0.613171128 | -2.381286534 | 3.85E-05 | 0.001929 | 0.001804 | 242 |
| HP_LEUKOPENIA                                                        | HP_LEUKOPENIA                                                        | HP_LEUKOPENIA                                                        | 22  | 0.537133806  | 2.64703559   | 3.94E-05 | 0.001968 | 0.001839 | 311 |
| HP_INCOMPLETE_PENETRANCE                                             | HP_INCOMPLETE_PENETRANCE                                             | HP_INCOMPLETE_PENETRANCE                                             | 17  | -0.624045233 | -2.373157631 | 4.17E-05 | 0.002071 | 0.001937 | 94  |
| GOCC_MITOCHONDRIAL_PROTEIN_CONTAINING_COMPLEX                        | GOCC_MITOCHONDRIAL_PROTEIN_CONTAINING_COMPLEX                        | GOCC_MITOCHONDRIAL_PROTEIN_CONTAINING_COMPLEX                        | 37  | -0.479535634 | -2.329652107 | 4.21E-05 | 0.002080 | 0.001945 | 94  |
| GOBP_RESPONSE_TO_OXIDATIVE_STRESS                                    | GOBP_RESPONSE_TO_OXIDATIVE_STRESS                                    | GOBP_RESPONSE_TO_OXIDATIVE_STRESS                                    | 39  | 0.400899446  | 2.500305705  | 4.29E-05 | 0.002112 | 0.001976 | 42  |
| GOBP_MITOCHONDRIAL_ELECTRON_TRANSPORT_NADH_TO_UBIQUINONE             | GOBP_MITOCHONDRIAL_ELECTRON_TRANSPORT_NADH_TO_UBIQUINONE             | GOBP_MITOCHONDRIAL_ELECTRON_TRANSPORT_NADH_TO_UBIQUINONE             | 13  | -0.673918268 | -2.309990761 | 4.44E-05 | 0.002138 | 0.001999 | 94  |
| GOCC_NADH_DEHYDROGENASE_COMPLEX                                      | GOCC_NADH_DEHYDROGENASE_COMPLEX                                      | GOCC_NADH_DEHYDROGENASE_COMPLEX                                      | 13  | -0.673918268 | -2.309990761 | 4.44E-05 | 0.002138 | 0.001999 | 94  |
| GOMF_NADH_DEHYDROGENASE_ACTIVITY                                     | GOMF_NADH_DEHYDROGENASE_ACTIVITY                                     | GOMF_NADH_DEHYDROGENASE_ACTIVITY                                     | 13  | -0.673918268 | -2.309990761 | 4.44E-05 | 0.002138 | 0.001999 | 94  |
| GOMF_OXIDOREDUCTASE_ACTIVITY_ACTING_ON_NAD_P_H_QUINONE_OR_SIMILAR_CO | GOMF_OXIDOREDUCTASE_ACTIVITY_ACTING_ON_NAD_P_H_QUINONE_OR_SIMILAR_CO | GOMF_OXIDOREDUCTASE_ACTIVITY_ACTING_ON_NAD_P_H_QUINONE_OR_SIMILAR_CO | 13  | -0.673918268 | -2.309990761 | 4.44E-05 | 0.002138 | 0.001999 | 94  |
| HP_OPTIC_ATROPHY                                                     | HP_OPTIC_ATROPHY                                                     | HP_OPTIC_ATROPHY                                                     | 53  | -0.421481383 | -2.291293026 | 4.44E-05 | 0.002138 | 0.001999 | 430 |
| GOBP_REGULATION_OF_INTRINSIC_APOPTOTIC_SIGNALING_PATHWAY             | GOBP_REGULATION_OF_INTRINSIC_APOPTOTIC_SIGNALING_PATHWAY             | GOBP_REGULATION_OF_INTRINSIC_APOPTOTIC_SIGNALING_PATHWAY             | 26  | -0.486680887 | -2.587978735 | 4.58E-05 | 0.002191 | 0.002050 | 94  |
| HP_ABNORMAL_RETINAL_VASCULAR_MORPHOLOGY                              | HP_ABNORMAL_RETINAL_VASCULAR_MORPHOLOGY                              | HP_ABNORMAL_RETINAL_VASCULAR_MORPHOLOGY                              | 26  | -0.545091585 | -2.330786638 | 4.6E-05  | 0.002191 | 0.002050 |     |

|                                                                         |                                                                         |                                                                         |     |              |              |           |           |             |     |
|-------------------------------------------------------------------------|-------------------------------------------------------------------------|-------------------------------------------------------------------------|-----|--------------|--------------|-----------|-----------|-------------|-----|
| GOBP_CELLULAR_RESPONSE_TO_UNFOLDED_PROTEIN                              | GOBP_CELLULAR_RESPONSE_TO_UNFOLDED_PROTEIN                              | GOBP_CELLULAR_RESPONSE_TO_UNFOLDED_PROTEIN                              | 25  | 0.472523982  | 2.493936886  | 0.000150i | 0.005936e | 0.005552i   | 46  |
| GOBP_APOPTOTIC_SIGNALING_PATHWAY                                        | GOBP_APOPTOTIC_SIGNALING_PATHWAY                                        | GOBP_APOPTOTIC_SIGNALING_PATHWAY                                        | 67  | 0.303733559  | 2.282677205  | 0.000154i | 0.006063e | 0.005671i   | 42  |
| HP_ABNORMAL_VASCULAR_PHYSIOLOGY                                         | HP_ABNORMAL_VASCULAR_PHYSIOLOGY                                         | HP_ABNORMAL_VASCULAR_PHYSIOLOGY                                         | 30  | -0.494646088 | -2.231425514 | 0.000161i | 0.006306e | 0.005895i   | 331 |
| GOMF_TRANSPORTER_ACTIVITY                                               | GOMF_TRANSPORTER_ACTIVITY                                               | GOMF_TRANSPORTER_ACTIVITY                                               | 59  | -0.391810237 | -2.177671049 | 0.000177i | 0.006932i | 0.006484i   | 222 |
| HP_ABNORMAL_RETINAL_MORPHOLOGY                                          | HP_ABNORMAL_RETINAL_MORPHOLOGY                                          | HP_ABNORMAL_RETINAL_MORPHOLOGY                                          | 85  | -0.345455218 | -2.095509343 | 0.000179i | 0.006953i | 0.006504i   | 483 |
| HP_GLUCOSE_INTOLERANCE                                                  | HP_GLUCOSE_INTOLERANCE                                                  | HP_GLUCOSE_INTOLERANCE                                                  | 41  | -0.434494315 | -2.186747896 | 0.000187i | 0.007240i | 0.006773i   | 161 |
| HP_ABNORMALITY_OF_THE_CEREBRAL_SUBCORTEX                                | HP_ABNORMALITY_OF_THE_CEREBRAL_SUBCORTEX                                | HP_ABNORMALITY_OF_THE_CEREBRAL_SUBCORTEX                                | 115 | -0.310924768 | -2.004495001 | 0.000188i | 0.007250i | 0.006781i   | 446 |
| GOBP_GENERATION_OF_PRECURSOR_METABOLITES_AND_ENERGY                     | GOBP_GENERATION_OF_PRECURSOR_METABOLITES_AND_ENERGY                     | GOBP_GENERATION_OF_PRECURSOR_METABOLITES_AND_ENERGY                     | 50  | -0.401475387 | -2.14658631  | 0.000193i | 0.007440i | 0.006960i   | 117 |
| HP_ABNORMAL_PERIPHERAL_NERVOUS_SYSTEM_MORPHOLOGY                        | HP_ABNORMAL_PERIPHERAL_NERVOUS_SYSTEM_MORPHOLOGY                        | HP_ABNORMAL_PERIPHERAL_NERVOUS_SYSTEM_MORPHOLOGY                        | 55  | -0.390892915 | -2.140455562 | 0.000199i | 0.007648i | 0.007154i   | 239 |
| HP_PSYCHOSIS                                                            | HP_PSYCHOSIS                                                            | HP_PSYCHOSIS                                                            | 13  | -0.638755299 | -2.189462592 | 0.000203i | 0.007737i | 0.007238i   | 94  |
| GOBP_POSITIVE_REGULATION_OF_MIRNA_TRANSCRIPTION                         | GOBP_POSITIVE_REGULATION_OF_MIRNA_TRANSCRIPTION                         | GOBP_POSITIVE_REGULATION_OF_MIRNA_TRANSCRIPTION                         | 8   | 0.735834953  | 3.256305094  | 0.000203i | 0.007737i | 0.007238i   | 75  |
| HP_DYSKINESIA                                                           | HP_DYSKINESIA                                                           | HP_DYSKINESIA                                                           | 31  | -0.476769656 | -2.175618148 | 0.000207i | 0.007847i | 0.007340i   | 320 |
| GOBP_REGULATION_OF_PROTEIN_STABILITY                                    | GOBP_REGULATION_OF_PROTEIN_STABILITY                                    | GOBP_REGULATION_OF_PROTEIN_STABILITY                                    | 38  | 0.389770408  | 2.422392825  | 0.000207i | 0.007847i | 0.007340i   | 46  |
| GOBP_INCLUSION_BODY_ASSEMBLY                                            | GOBP_INCLUSION_BODY_ASSEMBLY                                            | GOBP_INCLUSION_BODY_ASSEMBLY                                            | 4   | 0.916155944  | 2.111476149  | 0.000217i | 0.008115i | 0.007591i   | 7   |
| GOBP_NEGATIVE_REGULATION_OF_INCLUSION_BODY_ASSEMBLY                     | GOBP_NEGATIVE_REGULATION_OF_INCLUSION_BODY_ASSEMBLY                     | GOBP_NEGATIVE_REGULATION_OF_INCLUSION_BODY_ASSEMBLY                     | 4   | 0.916155944  | 2.111476149  | 0.000217i | 0.008115i | 0.007591i   | 7   |
| GOBP_REGULATION_OF_INCLUSION_BODY_ASSEMBLY                              | GOBP_REGULATION_OF_INCLUSION_BODY_ASSEMBLY                              | GOBP_REGULATION_OF_INCLUSION_BODY_ASSEMBLY                              | 4   | 0.916155944  | 2.111476149  | 0.000217i | 0.008115i | 0.007591i   | 7   |
| HP_ABNORMAL_GLUCOSE_HOMEOSTASIS                                         | HP_ABNORMAL_GLUCOSE_HOMEOSTASIS                                         | HP_ABNORMAL_GLUCOSE_HOMEOSTASIS                                         | 53  | -0.397327869 | -2.159967633 | 0.000221i | 0.008231i | 0.007699i   | 161 |
| HP_STROKE                                                               | HP_STROKE                                                               | HP_STROKE                                                               | 20  | -0.563912337 | -2.247023613 | 0.000227i | 0.008451i | 0.007905i   | 271 |
| GOMF_HYDROLASE_ACTIVITY_ACTING_ON_ACID_ANHYDRIDES                       | GOMF_HYDROLASE_ACTIVITY_ACTING_ON_ACID_ANHYDRIDES                       | GOMF_HYDROLASE_ACTIVITY_ACTING_ON_ACID_ANHYDRIDES                       | 66  | 0.30560989   | 2.262936078  | 0.000228i | 0.008451i | 0.007905i   | 72  |
| HP_ABNORMAL_URINE_PROTEIN_LEVEL                                         | HP_ABNORMAL_URINE_PROTEIN_LEVEL                                         | HP_ABNORMAL_URINE_PROTEIN_LEVEL                                         | 19  | -0.566696834 | -2.218300755 | 0.000229i | 0.008461i | 0.007914i   | 94  |
| HP_VASCULAR_SKIN_ABNORMALITY                                            | HP_VASCULAR_SKIN_ABNORMALITY                                            | HP_VASCULAR_SKIN_ABNORMALITY                                            | 63  | -0.370702635 | -2.088459281 | 0.000230i | 0.008478i | 0.007931i   | 304 |
| GOBP_CYTOSKELETON_DEPENDENT_INTRACELLULAR_TRANSPORT                     | GOBP_CYTOSKELETON_DEPENDENT_INTRACELLULAR_TRANSPORT                     | GOBP_CYTOSKELETON_DEPENDENT_INTRACELLULAR_TRANSPORT                     | 13  | 0.61626165   | 2.456874287  | 0.000232i | 0.008527i | 0.007976i   | 30  |
| GOBP_TELOMERASE_HOLOENZYME_COMPLEX_ASSEMBLY                             | GOBP_TELOMERASE_HOLOENZYME_COMPLEX_ASSEMBLY                             | GOBP_TELOMERASE_HOLOENZYME_COMPLEX_ASSEMBLY                             | 3   | 0.966015293  | 1.978052034  | 0.000234i | 0.008571i | 0.008018i   | 43  |
| HP_DEMENTIA                                                             | HP_DEMENTIA                                                             | HP_DEMENTIA                                                             | 22  | -0.530892488 | -2.17672547  | 0.000237i | 0.008649i | 0.008090i   | 137 |
| HP_CHOREA                                                               | HP_CHOREA                                                               | HP_CHOREA                                                               | 34  | -0.463132199 | -2.193530607 | 0.000243i | 0.008838i | 0.008267i   | 242 |
| HP_DEPRESSION                                                           | HP_DEPRESSION                                                           | HP_DEPRESSION                                                           | 37  | -0.445107862 | -2.162397111 | 0.000252i | 0.009129i | 0.008539i   | 239 |
| HP_TYPE_I_DIABETES_MELLITUS                                             | HP_TYPE_I_DIABETES_MELLITUS                                             | HP_TYPE_I_DIABETES_MELLITUS                                             | 15  | -0.629607734 | -2.254112107 | 0.000254i | 0.009144i | 0.008553i   | 114 |
| HP_RESPIRATORY_DISTRESS                                                 | HP_RESPIRATORY_DISTRESS                                                 | HP_RESPIRATORY_DISTRESS                                                 | 9   | -0.520551306 | -2.181702009 | 0.000254i | 0.009144i | 0.008553i   | 225 |
| GOBP_NADH_DEHYDROGENASE_COMPLEX_ASSEMBLY                                | GOBP_NADH_DEHYDROGENASE_COMPLEX_ASSEMBLY                                | GOBP_NADH_DEHYDROGENASE_COMPLEX_ASSEMBLY                                | 23  | -0.713766142 | -2.152023787 | 0.000257i | 0.009223i | 0.008627i   | 94  |
| HP_ABNORMALITY_OF_THE_PARATHYROID_GLAND                                 | HP_ABNORMALITY_OF_THE_PARATHYROID_GLAND                                 | HP_ABNORMALITY_OF_THE_PARATHYROID_GLAND                                 | 16  | -0.579392056 | -2.13649764  | 0.000266i | 0.009503i | 0.008886i   | 94  |
| HP_HEMIPLEGIA_HEMIPARESIS                                               | HP_HEMIPLEGIA_HEMIPARESIS                                               | HP_HEMIPLEGIA_HEMIPARESIS                                               | 22  | -0.527538322 | -2.162972968 | 0.000269i | 0.009585i | 0.008965i   | 94  |
| HP_HYPOPLASIA_OF_THE_CORPUS_CALLOSUM                                    | HP_HYPOPLASIA_OF_THE_CORPUS_CALLOSUM                                    | HP_HYPOPLASIA_OF_THE_CORPUS_CALLOSUM                                    | 64  | -0.376511318 | -2.127058915 | 0.000274i | 0.009736i | 0.009108i   | 253 |
| GOCC_CYTOCHROME_COMPLEX                                                 | GOCC_CYTOCHROME_COMPLEX                                                 | GOCC_CYTOCHROME_COMPLEX                                                 | 6   | -0.815156655 | -2.112280369 | 0.000293i | 0.010366i | 0.009969i   | 49  |
| GOCC_FICOLIN_1_RICH_GRANULE_LUMEN                                       | GOCC_FICOLIN_1_RICH_GRANULE_LUMEN                                       | GOCC_FICOLIN_1_RICH_GRANULE_LUMEN                                       | 18  | 0.530654867  | 2.435378536  | 0.000301i | 0.010661i | 0.009925i   | 55  |
| GOCC_CELL_SUBSTRATE_JUNCTION                                            | GOCC_CELL_SUBSTRATE_JUNCTION                                            | GOCC_CELL_SUBSTRATE_JUNCTION                                            | 70  | 0.291766601  | 2.216223427  | 0.000303i | 0.010636i | 0.009951i   | 225 |
| GOMF_DISORDERED_DOMAIN_SPECIFIC_BINDING                                 | GOMF_DISORDERED_DOMAIN_SPECIFIC_BINDING                                 | GOMF_DISORDERED_DOMAIN_SPECIFIC_BINDING                                 | 7   | 0.751130126  | 2.260333345  | 0.000308i | 0.010773i | 0.010077i   | 28  |
| HP_ABNORMALITY_OF_THE_THYROID_GLAND                                     | HP_ABNORMALITY_OF_THE_THYROID_GLAND                                     | HP_ABNORMALITY_OF_THE_THYROID_GLAND                                     | 48  | -0.404917396 | -2.136759515 | 0.000317i | 0.011018i | 0.010306i   | 451 |
| HP_APNEA                                                                | HP_APNEA                                                                | HP_APNEA                                                                | 30  | -0.4803057   | -2.166733792 | 0.000317i | 0.011018i | 0.010306i   | 351 |
| GOBP_CELLULAR_RESPONSE_TO_TOPOLOGICALLY_INCORRECT_PROTEIN               | GOBP_CELLULAR_RESPONSE_TO_TOPOLOGICALLY_INCORRECT_PROTEIN               | GOBP_CELLULAR_RESPONSE_TO_TOPOLOGICALLY_INCORRECT_PROTEIN               | 27  | 0.451634944  | 2.43794649   | 0.000320i | 0.011018i | 0.010306i   | 46  |
| GOMF_GLUTAMATE_RECEPTOR_BINDING                                         | GOMF_GLUTAMATE_RECEPTOR_BINDING                                         | GOMF_GLUTAMATE_RECEPTOR_BINDING                                         | 2   | -0.985568761 | -1.674740687 | 0.000320i | 0.011018i | 0.010306i   | 20  |
| GOMF_IONOTROPIC_GLUTAMATE_RECEPTOR_BINDING                              | GOMF_IONOTROPIC_GLUTAMATE_RECEPTOR_BINDING                              | GOMF_IONOTROPIC_GLUTAMATE_RECEPTOR_BINDING                              | 2   | -0.985568761 | -1.674740687 | 0.000320i | 0.011018i | 0.010306i   | 20  |
| HP_ABNORMAL_CELLULAR_PHENOTYPE                                          | HP_ABNORMAL_CELLULAR_PHENOTYPE                                          | HP_ABNORMAL_CELLULAR_PHENOTYPE                                          | 70  | -0.359732268 | -2.070141881 | 0.000327i | 0.011210i | 0.010468i   | 266 |
| HP_ATROPHY_DEGENERATION_AFFECTING_THE_CENTRAL_NERVOUS_SYSTEM            | HP_ATROPHY_DEGENERATION_AFFECTING_THE_CENTRAL_NERVOUS_SYSTEM            | HP_ATROPHY_DEGENERATION_AFFECTING_THE_CENTRAL_NERVOUS_SYSTEM            | 93  | -0.320152688 | -1.977972075 | 0.000327i | 0.011210i | 0.010468i   | 365 |
| GOBP_REGULATION_OF_RESPONSE_TO_STRESS                                   | GOBP_REGULATION_OF_RESPONSE_TO_STRESS                                   | GOBP_REGULATION_OF_RESPONSE_TO_STRESS                                   | 130 | 0.217828424  | 1.909431145  | 0.000339i | 0.011557i | 0.010811i   | 58  |
| GOMF_MISFOLDED_PROTEIN_BINDING                                          | GOMF_MISFOLDED_PROTEIN_BINDING                                          | GOMF_MISFOLDED_PROTEIN_BINDING                                          | 9   | 0.709333846  | 2.383105266  | 0.000354i | 0.012021i | 0.011234i   | 7   |
| GOBP_POSITIVE_REGULATION_OF_NEURON_DIFFERENTIATION                      | GOBP_POSITIVE_REGULATION_OF_NEURON_DIFFERENTIATION                      | GOBP_POSITIVE_REGULATION_OF_NEURON_DIFFERENTIATION                      | 6   | -0.810051107 | -2.099050583 | 0.000354i | 0.012021i | 0.011234i   | 230 |
| GOBP_CATION_TRANSPORT                                                   | GOBP_CATION_TRANSPORT                                                   | GOBP_CATION_TRANSPORT                                                   | 73  | -0.352084622 | -2.055498676 | 0.000361i | 0.012218i | 0.011429i   | 131 |
| HP_DIARRHEA                                                             | HP_DIARRHEA                                                             | HP_DIARRHEA                                                             | 41  | -0.420889351 | -2.118276054 | 0.000363i | 0.012249i | 0.011458i   | 218 |
| GOMF_MHC_CLASS_II_PROTEIN_COMPLEX_BINDING                               | GOMF_MHC_CLASS_II_PROTEIN_COMPLEX_BINDING                               | GOMF_MHC_CLASS_II_PROTEIN_COMPLEX_BINDING                               | 6   | 0.80659997   | 2.259877402  | 0.000369i | 0.012350i | 0.011553i   | 49  |
| GOMF_MHC_PROTEIN_COMPLEX_BINDING                                        | GOMF_MHC_PROTEIN_COMPLEX_BINDING                                        | GOMF_MHC_PROTEIN_COMPLEX_BINDING                                        | 6   | 0.80659997   | 2.259877402  | 0.000369i | 0.012350i | 0.011553i   | 49  |
| HP_ABNORMALITY_OF_THYROID_PHYSIOLOGY                                    | HP_ABNORMALITY_OF_THYROID_PHYSIOLOGY                                    | HP_ABNORMALITY_OF_THYROID_PHYSIOLOGY                                    | 38  | -0.4363741   | -2.131801007 | 0.000376i | 0.012559i | 0.011748i   | 451 |
| HP_ABNORMAL_CSF_PROTEIN_LEVEL                                           | HP_ABNORMAL_CSF_PROTEIN_LEVEL                                           | HP_ABNORMAL_CSF_PROTEIN_LEVEL                                           | 16  | -0.570913873 | -2.105234496 | 0.000384i | 0.012787i | 0.011961i   | 94  |
| HP_ABNORMAL_ESOPHAGUS_PHYSIOLOGY                                        | HP_ABNORMAL_ESOPHAGUS_PHYSIOLOGY                                        | HP_ABNORMAL_ESOPHAGUS_PHYSIOLOGY                                        | 77  | -0.346371865 | -2.048672099 | 0.000389i | 0.012905i | 0.012072i   | 451 |
| GOBP_POSITIVE_REGULATION_OF_NITRIC_OXIDE_METABOLIC_PROCESS              | GOBP_POSITIVE_REGULATION_OF_NITRIC_OXIDE_METABOLIC_PROCESS              | GOBP_POSITIVE_REGULATION_OF_NITRIC_OXIDE_METABOLIC_PROCESS              | 6   | 0.804372151  | 2.25363565   | 0.000393i | 0.013007i | 0.012167i   | 20  |
| GOBP_REGULATION_OF_CELL_CYCLE                                           | GOBP_REGULATION_OF_CELL_CYCLE                                           | GOBP_REGULATION_OF_CELL_CYCLE                                           | 106 | 0.242779675  | 2.052245801  | 0.000397i | 0.013089i | 0.012243i   | 298 |
| HP_IMPAIRED_SOCIAL_INTERACTIONS                                         | HP_IMPAIRED_SOCIAL_INTERACTIONS                                         | HP_IMPAIRED_SOCIAL_INTERACTIONS                                         | 14  | -0.601779771 | -2.120805862 | 0.000411i | 0.013534i | 0.012660i   | 98  |
| GOBP_MICROTUBULE_BASED_PROCESS                                          | GOBP_MICROTUBULE_BASED_PROCESS                                          | GOBP_MICROTUBULE_BASED_PROCESS                                          | 49  | 0.327278273  | 2.180980118  | 0.000436i | 0.014300i | 0.013377i   | 423 |
| HP_DEVELOPMENTAL_REGRESSION                                             | HP_DEVELOPMENTAL_REGRESSION                                             | HP_DEVELOPMENTAL_REGRESSION                                             | 40  | -0.421999693 | -2.126213818 | 0.000438i | 0.014304i | 0.013380i   | 40  |
| HP_SHORT_THUMB                                                          | HP_SHORT_THUMB                                                          | HP_SHORT_THUMB                                                          | 19  | 0.494716216  | 2.324731925  | 0.000480i | 0.015655i | 0.014644i   | 274 |
| HP_MENTAL_DETERIORATION                                                 | HP_MENTAL_DETERIORATION                                                 | HP_MENTAL_DETERIORATION                                                 | 31  | -0.458252399 | -2.091119312 | 0.000485i | 0.015763i | 0.014745i   | 137 |
| HP_BILATERAL_SENSORINEURAL_HEARING_IMPAIRMENT                           | HP_BILATERAL_SENSORINEURAL_HEARING_IMPAIRMENT                           | HP_BILATERAL_SENSORINEURAL_HEARING_IMPAIRMENT                           | 15  | -0.609967972 | -2.183869732 | 0.000525i | 0.016993i | 0.015895i   | 49  |
| GOMF_OXIDOREDUCTASE_ACTIVITY                                            | GOMF_OXIDOREDUCTASE_ACTIVITY                                            | GOMF_OXIDOREDUCTASE_ACTIVITY                                            | 45  | -0.406215467 | -2.101104384 | 0.000526i | 0.016999i | 0.015901i   | 94  |
| GOBP_POSITIVE_REGULATION_OF_BIOMINERALIZATION                           | GOBP_POSITIVE_REGULATION_OF_BIOMINERALIZATION                           | GOBP_POSITIVE_REGULATION_OF_BIOMINERALIZATION                           | 3   | -0.926083263 | -1.844624638 | 0.000545i | 0.017460i | 0.016332i   | 91  |
| GOBP_POSITIVE_REGULATION_OF_BONE_MINERALIZATION                         | GOBP_POSITIVE_REGULATION_OF_BONE_MINERALIZATION                         | GOBP_POSITIVE_REGULATION_OF_BONE_MINERALIZATION                         | 3   | -0.926083263 | -1.844624638 | 0.000545i | 0.017460i | 0.016332i   | 91  |
| GOBP_REGULATION_OF_DNA_BIOSYNTHETIC_PROCESS                             | GOBP_REGULATION_OF_DNA_BIOSYNTHETIC_PROCESS                             | GOBP_REGULATION_OF_DNA_BIOSYNTHETIC_PROCESS                             | 10  | 0.648856138  | 2.279509348  | 0.000545i | 0.017460i | 0.016332i   | 43  |
| GOCC_MITOCHONDRION                                                      | GOCC_MITOCHONDRION                                                      | GOCC_MITOCHONDRION                                                      | 139 | 0.215777156  | 1.908429787  | 0.000568i | 0.017914i | 0.016757i   | 112 |
| GOMF_G_PROTEIN_COUPLED_RECEPTOR_BINDING                                 | GOMF_G_PROTEIN_COUPLED_RECEPTOR_BINDING                                 | GOMF_G_PROTEIN_COUPLED_RECEPTOR_BINDING                                 | 15  | 0.563862081  | 2.378752875  | 0.000570i | 0.017914i | 0.016757i   | 17  |
| GOCC_DENDRITE_TERMINUS                                                  | GOCC_DENDRITE_TERMINUS                                                  | GOCC_DENDRITE_TERMINUS                                                  | 2   | 0.984719864  | 1.719029752  | 0.000571i | 0.017914i | 0.016757i   | 20  |
| GOCC_DENDRITIC_GROWTH_CONE                                              | GOCC_DENDRITIC_GROWTH_CONE                                              | GOCC_DENDRITIC_GROWTH_CONE                                              | 2   | 0.984719864  | 1.719029752  | 0.000571i | 0.017914i | 0.016757i   | 20  |
| GOCC_SPERM_HEAD                                                         | GOCC_SPERM_HEAD                                                         | GOCC_SPERM_HEAD                                                         | 2   | 0.984719864  | 1.719029752  | 0.000571i | 0.017914i | 0.016757i   | 20  |
| GOMF_NITRIC_OXIDE_SYNTHASE_REGULATOR_ACTIVITY                           | GOMF_NITRIC_OXIDE_SYNTHASE_REGULATOR_ACTIVITY                           | GOMF_NITRIC_OXIDE_SYNTHASE_REGULATOR_ACTIVITY                           | 2   | 0.984719864  | 1.719029752  | 0.000571i | 0.017914i | 0.016757i   | 20  |
| GOMF_TPR_DOMAIN_BINDING                                                 | GOMF_TPR_DOMAIN_BINDING                                                 | GOMF_TPR_DOMAIN_BINDING                                                 | 2   | 0.984719864  | 1.719029752  | 0.000571i | 0.017914i | 0.016757i   | 20  |
| HP_ABNORMAL_FEAR_ANXIETY_RELATED_BEHAVIOR                               | HP_ABNORMAL_FEAR_ANXIETY_RELATED_BEHAVIOR                               | HP_ABNORMAL_FEAR_ANXIETY_RELATED_BEHAVIOR                               | 51  | -0.394253164 | -2.122814155 | 0.000581i | 0.018167i | 0.016894i   | 458 |
| HP_HEADACHE                                                             | HP_HEADACHE                                                             | HP_HEADACHE                                                             | 29  | -0.475566419 | -2.124305745 | 0.000585i | 0.018235i | 0.017057i   | 257 |
| GOBP_REGULATION_OF_PROTEOLYSIS                                          | GOBP_REGULATION_OF_PROTEOLYSIS                                          | GOBP_REGULATION_OF_PROTEOLYSIS                                          | 73  | 0.278627929  | 2.12795412   | 0.000599i | 0.018618i | 0.017415i   | 46  |
| GOBP_RESPONSE_TO_ORGANIC_CYCLIC_COMPOUND                                | GOBP_RESPONSE_TO_ORGANIC_CYCLIC_COMPOUND                                | GOBP_RESPONSE_TO_ORGANIC_CYCLIC_COMPOUND                                | 78  | 0.264304744  | 2.065940123  | 0.000611i | 0.018956i | 0.017732i   | 82  |
| GOBP_POSITIVE_REGULATION_OF_DNA_BIOSYNTHETIC_PROCESS                    | GOBP_POSITIVE_REGULATION_OF_DNA_BIOSYNTHETIC_PROCESS                    | GOBP_POSITIVE_REGULATION_OF_DNA_BIOSYNTHETIC_PROCESS                    | 9   | 0.691769865  | 2.324096639  | 0.000616i | 0.019059i | 0.017828i   | 43  |
| HP_CONGESTIVE_HEART_FAILURE                                             | HP_CONGESTIVE_HEART_FAILURE                                             | HP_CONGESTIVE_HEART_FAILURE                                             | 25  | -0.490655651 | -2.080395588 | 0.000623i | 0.019219i | 0.017975i   | 125 |
| HP_BRAIN_IMAGING_ABNORMALITY                                            | HP_BRAIN_IMAGING_ABNORMALITY                                            | HP_BRAIN_IMAGING_ABNORMALITY                                            | 23  | -0.499103353 | -2.091811436 | 0.000637i | 0.019597i | 0.018325i   | 94  |
| GOBP_G_PROTEIN_COUPLED_PURINERGIC_NUCLEOTIDE_RECEPTOR_SIGNALING_PATHWAY | GOBP_G_PROTEIN_COUPLED_PURINERGIC_NUCLEOTIDE_RECEPTOR_SIGNALING_PATHWAY | GOBP_G_PROTEIN_COUPLED_PURINERGIC_NUCLEOTIDE_RECEPTOR_SIGNALING_PATHWAY | 2   | -0.977928693 | -1.661758201 | 0.000643i | 0.019656i | 0.018387i   | 29  |
| GOMF_G_PROTEIN_COUPLED_PURINERGIC_NUCLEOTIDE_RECEPTOR_ACTIVITY          | GOMF_G_PROTEIN_COUPLED_PURINERGIC_NUCLEOTIDE_RECEPTOR_ACTIVITY          | GOMF_G_PROTEIN_COUPLED_PURINERGIC_NUCLEOTIDE_RECEPTOR_ACTIVITY          | 2   | -0.977928693 | -1.661758201 | 0.000643i | 0.019656i | 0.018387i   | 29  |
| GOBP_TISSUE_DEVELOPMENT                                                 | GOBP_TISSUE_DEVELOPMENT                                                 | GOBP_TISSUE_DEVELOPMENT                                                 | 116 | 0.218266507  | 1.86804108   | 0.000663i | 0.020203i | 0.018898i   | 75  |
| GOBP_POSITIVE_REGULATION_OF_GENE_EXPRESSION                             | GOBP_POSITIVE_REGULATION_OF_GENE_EXPRESSION                             | GOBP_POSITIVE_REGULATION_OF_GENE_EXPRESSION                             | 127 | 0.213021645  | 1.876837901  | 0.000671i | 0.020386i | 0.019707i   | 83  |
| HP_ECTOPIC_CALCIFICATION                                                | HP_ECTOPIC_CALCIFICATION                                                | HP_ECTOPIC_CALCIFICATION                                                | 21  | -0.504711875 | -2.034503977 | 0.000700i | 0.021226i | 0.019855i   | 253 |
| GOBP_REACTIVE_NITROGEN_SPECIES_METABOLIC_PROCESS                        | GOBP_REACTIVE_NITROGEN_SPECIES_METABOLIC_PROCESS                        | GOBP_REACTIVE_NITROGEN_SPECIES_METABOLIC_PROCESS                        | 8   | 0.692890442  | 2.218787341  | 0.000710i | 0.021412i | 0.020029i   | 20  |
| GOBP_REGULATION_OF_NITRIC_OXIDE_METABOLIC_PROCESS                       | GOBP_REGULATION_OF_NITRIC_OXIDE_METABOLIC_PROCESS                       | GOBP_REGULATION_OF_NITRIC_OXIDE_METABOLIC_PROCESS                       | 8   | 0.692890442  | 2.218787341  | 0.000710i | 0.021412i | 0.020029i   | 20  |
| GOBP_REGULATION_OF_CELL_POPULATION_PROLIFERATION                        | GOBP_REGULATION_OF_CELL_POPULATION_PROLIFERATION                        | GOBP_REGULATION_OF_CELL_POPULATION_PROLIFERATION                        | 125 | 0.21627814   | 1.907934071  | 0.000713i | 0.021441i | 0.020056i   | 135 |
| GOBP_NEGATIVE_REGULATION_OF_PROTEIN_METABOLIC_PROCESS                   | GOBP_NEGATIVE_REGULATION_OF_PROTEIN_METABOLIC_PROCESS                   | GOBP_NEGATIVE_REGULATION_OF_PROTEIN_METABOLIC_PROCESS                   | 111 | 0.226931747  | 1.926123982  | 0.000754i | 0.022598i | 0.021139i   | 57  |
| GOBP_ION_TRANSPORT                                                      | GOBP_ION_TRANSPORT                                                      | GOBP_ION_TRANSPORT                                                      | 82  | -0.321999828 | -1.931874623 | 0.000768i | 0.022849i | 0.021373i</ |     |

|                                                                      |                                                                      |                                                                      |     |              |              |          |          |          |     |
|----------------------------------------------------------------------|----------------------------------------------------------------------|----------------------------------------------------------------------|-----|--------------|--------------|----------|----------|----------|-----|
| HP_INFANTILE_MUSCULAR_HYPOTONIA                                      | HP_INFANTILE_MUSCULAR_HYPOTONIA                                      | HP_INFANTILE_MUSCULAR_HYPOTONIA                                      | 24  | -0.464077246 | -1.944587419 | 0.001624 | 0.042566 | 0.039816 | 164 |
| HP_GASTROESOPHAGEAL_REFLEX                                           | HP_GASTROESOPHAGEAL_REFLEX                                           | HP_GASTROESOPHAGEAL_REFLEX                                           | 48  | -0.367948947 | -1.941676056 | 0.001647 | 0.043066 | 0.040264 | 441 |
| HP_POOR_EYE_CONTACT                                                  | HP_POOR_EYE_CONTACT                                                  | HP_POOR_EYE_CONTACT                                                  | 10  | -0.64815051  | -2.046143219 | 0.001719 | 0.044848 | 0.041950 | 239 |
| HP_APRAXIA                                                           | HP_APRAXIA                                                           | HP_APRAXIA                                                           | 18  | -0.521677973 | -2.025969125 | 0.001730 | 0.045028 | 0.042120 | 202 |
| GOBP_RESPONSE_TO_WOUNDING                                            | GOBP_RESPONSE_TO_WOUNDING                                            | GOBP_RESPONSE_TO_WOUNDING                                            | 37  | 0.352006853  | 2.144437645  | 0.001756 | 0.045587 | 0.042643 | 58  |
| HP_SHORT_ATTENTION_SPAN                                              | HP_SHORT_ATTENTION_SPAN                                              | HP_SHORT_ATTENTION_SPAN                                              | 64  | -0.344871958 | -1.948880798 | 0.001802 | 0.046661 | 0.043647 | 177 |
| GOBP_REGULATION_OF_ION_TRANSMEMBRANE_TRANSPORT                       | GOBP_REGULATION_OF_ION_TRANSMEMBRANE_TRANSPORT                       | GOBP_REGULATION_OF_ION_TRANSMEMBRANE_TRANSPORT                       | 23  | -0.475940583 | -1.994732345 | 0.001814 | 0.046877 | 0.043849 | 170 |
| GOBP_REGENERATION                                                    | GOBP_REGENERATION                                                    | GOBP_REGENERATION                                                    | 12  | 0.573144358  | 2.221542395  | 0.001852 | 0.047733 | 0.044650 | 174 |
| GOCC_RESPIRATORY_CHAIN_COMPLEX_IV                                    | GOCC_RESPIRATORY_CHAIN_COMPLEX_IV                                    | GOCC_RESPIRATORY_CHAIN_COMPLEX_IV                                    | 5   | -0.799987301 | -1.934925625 | 0.001916 | 0.048283 | 0.046100 | 25  |
| HP_COGNITIVE_IMPAIRMENT                                              | HP_COGNITIVE_IMPAIRMENT                                              | HP_COGNITIVE_IMPAIRMENT                                              | 46  | -0.365942037 | -1.902918628 | 0.001923 | 0.049333 | 0.046149 | 239 |
| GOBP_RESPONSE_TO_MECHANICAL_STIMULUS                                 | GOBP_RESPONSE_TO_MECHANICAL_STIMULUS                                 | GOBP_RESPONSE_TO_MECHANICAL_STIMULUS                                 | 16  | 0.484745274  | 2.102303351  | 0.001949 | 0.049782 | 0.046566 | 82  |
| HP_MOTOR_DELAY                                                       | HP_MOTOR_DELAY                                                       | HP_MOTOR_DELAY                                                       | 76  | -0.327371213 | -1.922099895 | 0.001950 | 0.049782 | 0.046566 | 253 |
| GOMF_OXIDOREDUCTASE_ACTIVITY_ACTING_ON_A_HEME_GROUP_OF_DONORS        | GOMF_OXIDOREDUCTASE_ACTIVITY_ACTING_ON_A_HEME_GROUP_OF_DONORS        | GOMF_OXIDOREDUCTASE_ACTIVITY_ACTING_ON_A_HEME_GROUP_OF_DONORS        | 5   | -0.798697011 | -1.9318088   | 0.002006 | 0.051079 | 0.047776 | 25  |
| GOBP_POSITIVE_REGULATION_OF_OSTEOCLAST_DIFFERENTIATION               | GOBP_POSITIVE_REGULATION_OF_OSTEOCLAST_DIFFERENTIATION               | GOBP_POSITIVE_REGULATION_OF_OSTEOCLAST_DIFFERENTIATION               | 2   | 0.971137521  | 1.695318996  | 0.002013 | 0.051079 | 0.047776 | 36  |
| GOBP_SUPRAMOLECULAR_FIBER_ORGANIZATION                               | GOBP_SUPRAMOLECULAR_FIBER_ORGANIZATION                               | GOBP_SUPRAMOLECULAR_FIBER_ORGANIZATION                               | 60  | 0.276646545  | 1.981894209  | 0.002014 | 0.051079 | 0.047776 | 63  |
| GOCC_RESPIRATORY_CHAIN_COMPLEX_III                                   | GOCC_RESPIRATORY_CHAIN_COMPLEX_III                                   | GOCC_RESPIRATORY_CHAIN_COMPLEX_III                                   | 2   | -0.960950764 | -1.632908232 | 0.002045 | 0.051680 | 0.048342 | 49  |
| GOCC_PERINUCLEAR_REGION_OF_CYTOPLASM                                 | GOCC_PERINUCLEAR_REGION_OF_CYTOPLASM                                 | GOCC_PERINUCLEAR_REGION_OF_CYTOPLASM                                 | 55  | 0.292611683  | 2.033085202  | 0.002048 | 0.051680 | 0.048342 | 28  |
| GOBP_REGULATION_OF_BIOMINERALIZATION                                 | GOBP_REGULATION_OF_BIOMINERALIZATION                                 | GOBP_REGULATION_OF_BIOMINERALIZATION                                 | 5   | -0.797599422 | -1.929154063 | 0.002095 | 0.052745 | 0.049330 | 136 |
| GOBP_NEGATIVE_REGULATION_OF_PROTEIN_MODIFICATION_PROCESS             | GOBP_NEGATIVE_REGULATION_OF_PROTEIN_MODIFICATION_PROCESS             | GOBP_NEGATIVE_REGULATION_OF_PROTEIN_MODIFICATION_PROCESS             | 58  | 0.28301771   | 2.0188828    | 0.002151 | 0.054030 | 0.050540 | 31  |
| GOBP_BIOLOGICAL_PROCESS_INVOLVED_IN_INTERACTION_WITH_SYMBIONT        | GOBP_BIOLOGICAL_PROCESS_INVOLVED_IN_INTERACTION_WITH_SYMBIONT        | GOBP_BIOLOGICAL_PROCESS_INVOLVED_IN_INTERACTION_WITH_SYMBIONT        | 17  | 0.49168477   | 2.178566525  | 0.002159 | 0.054129 | 0.050627 | 46  |
| GOMF_ATP_HYDROLYSIS_ACTIVITY                                         | GOMF_ATP_HYDROLYSIS_ACTIVITY                                         | GOMF_ATP_HYDROLYSIS_ACTIVITY                                         | 41  | 0.324707823  | 2.032402061  | 0.002169 | 0.054169 | 0.050668 | 72  |
| GOBP_MITOTIC_SPINDLE_ASSEMBLY                                        | GOBP_MITOTIC_SPINDLE_ASSEMBLY                                        | GOBP_MITOTIC_SPINDLE_ASSEMBLY                                        | 3   | 0.912772101  | 1.869029118  | 0.002191 | 0.054657 | 0.051127 | 7   |
| GOMF_INORGANIC_MOLECULAR_ENTITY_TRANSMEMBRANE_TRANSPORTER_ACTIVITY   | GOMF_INORGANIC_MOLECULAR_ENTITY_TRANSMEMBRANE_TRANSPORTER_ACTIVITY   | GOMF_INORGANIC_MOLECULAR_ENTITY_TRANSMEMBRANE_TRANSPORTER_ACTIVITY   | 30  | -0.42999494  | -1.939729011 | 0.002274 | 0.056071 | 0.052951 | 162 |
| GOBP_RESPONSE_TO_CYCLOHEXIMIDE                                       | GOBP_RESPONSE_TO_CYCLOHEXIMIDE                                       | GOBP_RESPONSE_TO_CYCLOHEXIMIDE                                       | 2   | 0.968590832  | 1.69087323   | 0.002286 | 0.056766 | 0.053100 | 39  |
| GOBP_ADAPTIVE_IMMUNE_RESPONSE                                        | GOBP_ADAPTIVE_IMMUNE_RESPONSE                                        | GOBP_ADAPTIVE_IMMUNE_RESPONSE                                        | 44  | -0.370581154 | -1.909226258 | 0.002331 | 0.057438 | 0.053728 | 278 |
| GOBP_INTERLEUKIN_8_PRODUCTION                                        | GOBP_INTERLEUKIN_8_PRODUCTION                                        | GOBP_INTERLEUKIN_8_PRODUCTION                                        | 7   | 0.682789056  | 2.054678434  | 0.002353 | 0.058083 | 0.054331 | 16  |
| HP_MEMORY_IMPAIRMENT                                                 | HP_MEMORY_IMPAIRMENT                                                 | HP_MEMORY_IMPAIRMENT                                                 | 18  | -0.512559852 | -1.990558333 | 0.002355 | 0.058083 | 0.054331 | 211 |
| HP_ABNORMALITY_OF_COORDINATION                                       | HP_ABNORMALITY_OF_COORDINATION                                       | HP_ABNORMALITY_OF_COORDINATION                                       | 92  | -0.298306969 | -1.836702393 | 0.002385 | 0.058698 | 0.054907 | 152 |
| GOCC_AXONAL_GROWTH_CONE                                              | GOCC_AXONAL_GROWTH_CONE                                              | GOCC_AXONAL_GROWTH_CONE                                              | 3   | 0.909090909  | 1.86149136   | 0.002404 | 0.059027 | 0.055215 | 110 |
| GOBP_REGULATION_OF_NEURON_DIFFERENTIATION                            | GOBP_REGULATION_OF_NEURON_DIFFERENTIATION                            | GOBP_REGULATION_OF_NEURON_DIFFERENTIATION                            | 12  | -0.579133052 | -1.927820817 | 0.002450 | 0.060016 | 0.056140 | 259 |
| HP_PERIPHERAL_AXONAL_DEGENERATION                                    | HP_PERIPHERAL_AXONAL_DEGENERATION                                    | HP_PERIPHERAL_AXONAL_DEGENERATION                                    | 24  | -0.452520338 | -1.896161388 | 0.002456 | 0.060020 | 0.056143 | 159 |
| GOMF_UBIQUITIN_PROTEIN_TRANSFERASE_REGULATOR_ACTIVITY                | GOMF_UBIQUITIN_PROTEIN_TRANSFERASE_REGULATOR_ACTIVITY                | GOMF_UBIQUITIN_PROTEIN_TRANSFERASE_REGULATOR_ACTIVITY                | 4   | 0.857142857  | 1.975467944  | 0.002468 | 0.060185 | 0.056298 | 172 |
| GOBP_CELLULAR_RESPONSE_TO_ACID_CHEMICAL                              | GOBP_CELLULAR_RESPONSE_TO_ACID_CHEMICAL                              | GOBP_CELLULAR_RESPONSE_TO_ACID_CHEMICAL                              | 7   | 0.681229838  | 2.049986369  | 0.002501 | 0.060625 | 0.056709 | 142 |
| GOBP_FIBROBLAST_PROLIFERATION                                        | GOBP_FIBROBLAST_PROLIFERATION                                        | GOBP_FIBROBLAST_PROLIFERATION                                        | 7   | 0.680306698  | 2.047208415  | 0.002501 | 0.060625 | 0.056709 | 55  |
| HP_PERIPHERAL_NEUROPATHY                                             | HP_PERIPHERAL_NEUROPATHY                                             | HP_PERIPHERAL_NEUROPATHY                                             | 52  | -0.360264797 | -1.937987075 | 0.002503 | 0.060625 | 0.056709 | 159 |
| HP_HYDROPS_FETALIS                                                   | HP_HYDROPS_FETALIS                                                   | HP_HYDROPS_FETALIS                                                   | 21  | 0.435979918  | 2.135259609  | 0.002534 | 0.061259 | 0.057302 | 274 |
| GOCC_CENTRIOLE                                                       | GOCC_CENTRIOLE                                                       | GOCC_CENTRIOLE                                                       | 7   | 0.679563623  | 2.044972321  | 0.002551 | 0.061511 | 0.057540 | 34  |
| HP_ABNORMAL_CIRCULATING_CARBOXYLIC_ACID_CONCENTRATION                | HP_ABNORMAL_CIRCULATING_CARBOXYLIC_ACID_CONCENTRATION                | HP_ABNORMAL_CIRCULATING_CARBOXYLIC_ACID_CONCENTRATION                | 20  | -0.499076707 | -1.988672834 | 0.002585 | 0.062206 | 0.058188 | 125 |
| HP_ABNORMALITY_OF_SKIN_PIGMENTATION                                  | HP_ABNORMALITY_OF_SKIN_PIGMENTATION                                  | HP_ABNORMALITY_OF_SKIN_PIGMENTATION                                  | 51  | -0.360561269 | -1.941403735 | 0.002638 | 0.063340 | 0.059249 | 125 |
| GOCC_ORGANELLE_INNER_MEMBRANE                                        | GOCC_ORGANELLE_INNER_MEMBRANE                                        | GOCC_ORGANELLE_INNER_MEMBRANE                                        | 57  | -0.333473059 | -1.841078645 | 0.002655 | 0.063612 | 0.059504 | 94  |
| HP_SLEEP_DISTURBANCE                                                 | HP_SLEEP_DISTURBANCE                                                 | HP_SLEEP_DISTURBANCE                                                 | 59  | -0.342000422 | -1.900829405 | 0.002682 | 0.063637 | 0.059527 | 451 |
| GOBP_SPINDLE_ASSEMBLY                                                | GOBP_SPINDLE_ASSEMBLY                                                | GOBP_SPINDLE_ASSEMBLY                                                | 9   | 0.6470419    | 2.17382685   | 0.002673 | 0.063751 | 0.059534 | 92  |
| GOBP_HINDBRAIN_DEVELOPMENT                                           | GOBP_HINDBRAIN_DEVELOPMENT                                           | GOBP_HINDBRAIN_DEVELOPMENT                                           | 14  | -0.554738164 | -1.955020767 | 0.002692 | 0.064068 | 0.059929 | 351 |
| GOBP_NEGATIVE_REGULATION_OF_B_CELL_APOPTOTIC_PROCESS                 | GOBP_NEGATIVE_REGULATION_OF_B_CELL_APOPTOTIC_PROCESS                 | GOBP_NEGATIVE_REGULATION_OF_B_CELL_APOPTOTIC_PROCESS                 | 3   | -0.86491079  | -1.722777873 | 0.002711 | 0.064271 | 0.060120 | 163 |
| GOMF_DNA_POLYMERASE_BINDING                                          | GOMF_DNA_POLYMERASE_BINDING                                          | GOMF_DNA_POLYMERASE_BINDING                                          | 4   | 0.854452177  | 1.971548365  | 0.002712 | 0.064271 | 0.060120 | 174 |
| HP_PRIMARY_MICROCEPHALY                                              | HP_PRIMARY_MICROCEPHALY                                              | HP_PRIMARY_MICROCEPHALY                                              | 5   | -0.789787234 | -1.91025872  | 0.002778 | 0.065691 | 0.061452 | 253 |
| GOBP_REGULATION_OF_EXTRINSIC_APOPTOTIC_SIGNALING_PATHWAY             | GOBP_REGULATION_OF_EXTRINSIC_APOPTOTIC_SIGNALING_PATHWAY             | GOBP_REGULATION_OF_EXTRINSIC_APOPTOTIC_SIGNALING_PATHWAY             | 20  | 0.438228429  | 2.095649544  | 0.002857 | 0.067258 | 0.062915 | 42  |
| HP_APLASIA_HYPOPLASIA_OF_THE_THUMB                                   | HP_APLASIA_HYPOPLASIA_OF_THE_THUMB                                   | HP_APLASIA_HYPOPLASIA_OF_THE_THUMB                                   | 20  | 0.438624068  | 2.097541529  | 0.002857 | 0.067258 | 0.062915 | 274 |
| HP_FUNCTIONAL_ABNORMALITY_OF_THE_INNER_EAR                           | HP_FUNCTIONAL_ABNORMALITY_OF_THE_INNER_EAR                           | HP_FUNCTIONAL_ABNORMALITY_OF_THE_INNER_EAR                           | 78  | -0.30780534  | -1.817705861 | 0.002948 | 0.069113 | 0.064649 | 430 |
| HP_POSTERIOR_UVEITIS                                                 | HP_POSTERIOR_UVEITIS                                                 | HP_POSTERIOR_UVEITIS                                                 | 3   | -0.861512319 | -1.716008609 | 0.002951 | 0.069113 | 0.064649 | 167 |
| GOMF_PROTEIN_DOMAIN_SPECIFIC_BINDING                                 | GOMF_PROTEIN_DOMAIN_SPECIFIC_BINDING                                 | GOMF_PROTEIN_DOMAIN_SPECIFIC_BINDING                                 | 85  | 0.23137359   | 1.884176235  | 0.002955 | 0.069113 | 0.064649 | 51  |
| GOBP_POSITIVE_REGULATION_OF_WNT_SIGNALING_PATHWAY                    | GOBP_POSITIVE_REGULATION_OF_WNT_SIGNALING_PATHWAY                    | GOBP_POSITIVE_REGULATION_OF_WNT_SIGNALING_PATHWAY                    | 13  | -0.568325214 | -1.948049273 | 0.002979 | 0.069385 | 0.064904 | 250 |
| HP_ACUTE_MYELOID_LEUKEMIA                                            | HP_ACUTE_MYELOID_LEUKEMIA                                            | HP_ACUTE_MYELOID_LEUKEMIA                                            | 20  | 0.43697879   | 2.089673652  | 0.002979 | 0.069385 | 0.064904 | 277 |
| GOCC_CELL_BODY                                                       | GOCC_CELL_BODY                                                       | GOCC_CELL_BODY                                                       | 28  | 0.3711183579 | 2.021675508  | 0.002996 | 0.069632 | 0.065135 | 222 |
| GOMF_CATION_TRANSMEMBRANE_TRANSPORTER_ACTIVITY                       | GOMF_CATION_TRANSMEMBRANE_TRANSPORTER_ACTIVITY                       | GOMF_CATION_TRANSMEMBRANE_TRANSPORTER_ACTIVITY                       | 29  | -0.431342813 | -1.926763496 | 0.003056 | 0.070861 | 0.066291 | 91  |
| GOBP_NEGATIVE_REGULATION_OF_CELL_DEATH                               | GOBP_NEGATIVE_REGULATION_OF_CELL_DEATH                               | GOBP_NEGATIVE_REGULATION_OF_CELL_DEATH                               | 92  | 0.23521834   | 1.948223913  | 0.003064 | 0.070900 | 0.066321 | 46  |
| HP_CROHN_S_DISEASE                                                   | HP_CROHN_S_DISEASE                                                   | HP_CROHN_S_DISEASE                                                   | 4   | -0.798473701 | -1.78735935  | 0.003110 | 0.071830 | 0.067190 | 76  |
| GOBP_REGULATION_OF_MIRNA_TRANSCRIPTION                               | GOBP_REGULATION_OF_MIRNA_TRANSCRIPTION                               | GOBP_REGULATION_OF_MIRNA_TRANSCRIPTION                               | 9   | 0.838962147  | 2.146681799  | 0.003140 | 0.072353 | 0.067600 | 75  |
| HP_OPTIC_NERVE_HYPOPLASIA                                            | HP_OPTIC_NERVE_HYPOPLASIA                                            | HP_OPTIC_NERVE_HYPOPLASIA                                            | 3   | -0.856414613 | -1.705854512 | 0.003161 | 0.072689 | 0.067904 | 173 |
| GOMF_ACTIVE_ION_TRANSMEMBRANE_TRANSPORTER_ACTIVITY                   | GOMF_ACTIVE_ION_TRANSMEMBRANE_TRANSPORTER_ACTIVITY                   | GOMF_ACTIVE_ION_TRANSMEMBRANE_TRANSPORTER_ACTIVITY                   | 13  | -0.563212229 | -1.930523488 | 0.003202 | 0.073003 | 0.068298 | 49  |
| GOBP_BONE_RESORPTION                                                 | GOBP_BONE_RESORPTION                                                 | GOBP_BONE_RESORPTION                                                 | 7   | -0.678405839 | -1.857885751 | 0.003203 | 0.073003 | 0.068298 | 285 |
| GOBP_ADENYLATE_CYCLASE_ACTIVATING_G_PROTEIN_COUPLED_RECEPTOR_SIGNALI | GOBP_ADENYLATE_CYCLASE_ACTIVATING_G_PROTEIN_COUPLED_RECEPTOR_SIGNALI | GOBP_ADENYLATE_CYCLASE_ACTIVATING_G_PROTEIN_COUPLED_RECEPTOR_SIGNALI | 9   | -0.641061039 | -1.932815981 | 0.003291 | 0.073003 | 0.068298 | 144 |
| HP_TUBE_FEEDING                                                      | HP_TUBE_FEEDING                                                      | HP_TUBE_FEEDING                                                      | 27  | -0.433639396 | -1.878197616 | 0.003307 | 0.073003 | 0.068298 | 320 |
| GOBP_RIBOSOMAL_SMALL_SUBUNIT_ASSEMBLY                                | GOBP_RIBOSOMAL_SMALL_SUBUNIT_ASSEMBLY                                | GOBP_RIBOSOMAL_SMALL_SUBUNIT_ASSEMBLY                                | 8   | 0.633823069  | 2.029640641  | 0.003320 | 0.073003 | 0.068298 | 274 |
| GOMF_R_SMA_D_BINDING                                                 | GOMF_R_SMA_D_BINDING                                                 | GOMF_R_SMA_D_BINDING                                                 | 3   | 0.899660183  | 1.842180624  | 0.003356 | 0.073003 | 0.068298 | 13  |
| HP_HEPATIC_FAILURE                                                   | HP_HEPATIC_FAILURE                                                   | HP_HEPATIC_FAILURE                                                   | 21  | -0.468424203 | -1.888227623 | 0.003359 | 0.073003 | 0.068298 | 114 |
| HP_DEEPLY_SET_EYE                                                    | HP_DEEPLY_SET_EYE                                                    | HP_DEEPLY_SET_EYE                                                    | 24  | -0.444339414 | -1.861881486 | 0.003389 | 0.073003 | 0.068298 | 441 |
| GOBP_NEGATIVE_REGULATION_OF_DIGESTIVE_SYSTEM_PROCESS                 | GOBP_NEGATIVE_REGULATION_OF_DIGESTIVE_SYSTEM_PROCESS                 | GOBP_NEGATIVE_REGULATION_OF_DIGESTIVE_SYSTEM_PROCESS                 | 1   | -1           | -1.326956239 | 0.003369 | 0.073003 | 0.068298 | 2   |
| GOBP_POSITIVE_REGULATION_OF_BLOOD_PRESSURE                           | GOBP_POSITIVE_REGULATION_OF_BLOOD_PRESSURE                           | GOBP_POSITIVE_REGULATION_OF_BLOOD_PRESSURE                           | 1   | -1           | -1.326956239 | 0.003369 | 0.073003 | 0.068298 | 2   |
| GOBP_POSITIVE_REGULATION_OF_POTASSIUM_ION_IMPORT_ACROSS_PLASMA_MEMB  | GOBP_POSITIVE_REGULATION_OF_POTASSIUM_ION_IMPORT_ACROSS_PLASMA_MEMB  | GOBP_POSITIVE_REGULATION_OF_POTASSIUM_ION_IMPORT_ACROSS_PLASMA_MEMB  | 1   | -1           | -1.326956239 | 0.003369 | 0.073003 | 0.068298 | 2   |
| GOBP_POSITIVE_REGULATION_OF_SYSTEMIC_ARTERIAL_BLOOD_PRESSURE         | GOBP_POSITIVE_REGULATION_OF_SYSTEMIC_ARTERIAL_BLOOD_PRESSURE         | GOBP_POSITIVE_REGULATION_OF_SYSTEMIC_ARTERIAL_BLOOD_PRESSURE         | 1   | -1           | -1.326956239 | 0.003369 | 0.073003 | 0.068298 | 2   |
| GOBP_REGULATION_OF_CELL_CELL_ADHESION_MEDIATED_BY_INTEGRIN           | GOBP_REGULATION_OF_CELL_CELL_ADHESION_MEDIATED_BY_INTEGRIN           | GOBP_REGULATION_OF_CELL_CELL_ADHESION_MEDIATED_BY_INTEGRIN           | 1   | -1           | -1.326956239 | 0.003369 | 0.073003 | 0.068298 | 2   |
| GOBP_REGULATION_OF_PANCREATIC_JUICE_SECRETION                        | GOBP_REGULATION_OF_PANCREATIC_JUICE_SECRETION                        | GOBP_REGULATION_OF_PANCREATIC_JUICE_SECRETION                        | 1   | -1           | -1.326956239 | 0.003369 | 0.073003 | 0.068298 | 2   |
| GOBP_REGULATION_OF_POTASSIUM_ION_IMPORT                              | GOBP_REGULATION_OF_POTASSIUM_ION_IMPORT                              | GOBP_REGULATION_OF_POTASSIUM_ION_IMPORT                              | 1   | -1           | -1.326956239 | 0.003369 | 0.073003 | 0.068298 | 2   |
| GOMF_POTASSIUM_CHANNEL_INHIBITOR_ACTIVITY                            | GOMF_POTASSIUM_CHANNEL_INHIBITOR_ACTIVITY                            | GOMF_POTASSIUM_CHANNEL_INHIBITOR_ACTIVITY                            | 1   | -1           | -1.326956239 | 0.003369 | 0.073003 | 0.068298 | 2   |
| HP_ABNORMALITY_OF_TASTE_SENSATION                                    | HP_ABNORMALITY_OF_TASTE_SENSATION                                    | HP_ABNORMALITY_OF_TASTE_SENSATION                                    | 1   | -1           | -1.326956239 | 0.003369 | 0.073003 | 0.068298 | 2   |
| HP_ABNORMAL_BLOOD_CHLORIDE_CONCENTRATION                             | HP_ABNORMAL_BLOOD_CHLORIDE_CONCENTRATION                             | HP_ABNORMAL_BLOOD_CHLORIDE_CONCENTRATION                             | 1   | -1           | -1.326956239 | 0.003369 | 0.073003 | 0.068298 | 2   |
| HP_ACRAL_ULCERATION                                                  | HP_ACRAL_ULCERATION                                                  | HP_ACRAL_ULCERATION                                                  | 1   | -1           | -1.326956239 | 0.003369 | 0.073003 | 0.068298 | 2   |
| HP_AUTOAMPUTATION                                                    | HP_AUTOAMPUTATION                                                    | HP_AUTOAMPUTATION                                                    | 1   | -1           | -1.326956239 | 0.003369 | 0.073003 | 0.068298 | 2   |
| HP_AUTOAMPUTATION_OF_DIGITS                                          | HP_AUTOAMPUTATION_OF_DIGITS                                          | HP_AUTOAMPUTATION_OF_DIGITS                                          | 1   | -1           | -1.326956239 | 0.003369 | 0.073003 | 0.068298 | 2   |
| HP_DECREASED_CORNEAL_REFLEX                                          | HP_DECREASED_CORNEAL_REFLEX                                          | HP_DECREASED_CORNEAL_REFLEX                                          | 1   | -1           | -1.326956239 | 0.003369 | 0.073003 | 0.068298 | 2   |
| HP_FOOT_ACROOSTEOLYSIS                                               | HP_FOOT_ACROOSTEOLYSIS                                               | HP_FOOT_ACROOSTEOLYSIS                                               | 1   | -1           | -1.326956239 | 0.003369 | 0.073003 | 0.068298 | 2   |
| HP_HYPERCHLOREMIC_ACIDOSIS                                           | HP_HYPERCHLOREMIC_ACIDOSIS                                           | HP_HYPERCHLOREMIC_ACIDOSIS                                           | 1   | -1           | -1.326956239 | 0.003369 | 0.073003 | 0.068298 | 2   |
| HP_HYPERKALEMIA                                                      | HP_HYPERKALEMIA                                                      | HP_HYPERKALEMIA                                                      | 1   | -1           | -1.326956239 | 0.003369 | 0.073003 | 0.068298 | 2   |
| HP_OSTEOLYSIS_INVOLVING_BONES_OF_THE_FEET                            | HP_OSTEOLYSIS_INVOLVING_BONES_OF_THE_FEET                            | HP_OSTEOLYSIS_INVOLVING_BONES_OF_THE_FEET                            | 1   | -1           | -1.326956239 | 0.003369 | 0.073003 | 0.068298 | 2   |
| HP_OSTEOLYSIS_INVOLVING_BONES_OF_THE_UPPER_LIMBS                     | HP_OSTEOLYSIS_INVOLVING_BONES_OF_THE_UPPER_LIMBS                     | HP_OSTEOLYSIS_INVOLVING_BONES_OF_THE_UPPER_LIMBS                     | 1   | -1           | -1.326956239 | 0.003369 | 0.073003 | 0.068298 | 2   |
| HP_PAINLESS_FRACTURES_DUE_TO_INJURY                                  | HP_PAINLESS_FRACTURES_DUE_TO_INJURY                                  | HP_PAINLESS_FRACTURES_DUE_TO_INJURY                                  | 1   | -1           | -1.326956239 | 0.003369 | 0.073003 | 0.068298 | 2   |
| HP_PSEUDOHYPALDOSTERONISM                                            | HP_PSEUDOHYPALDOSTERONISM                                            | HP_PSEUDOHYPALDOSTERONISM                                            | 1   | -1           | -1.326956239 | 0.003369 | 0.073003 | 0.068298 | 2   |
| HP_ABNORMAL_PATTERN_OF_RESPIRATION                                   | HP_ABNORMAL_PATTERN_OF_RESPIRATION                                   | HP_ABNORMAL_PATTERN_OF_RESPIRATION                                   | 63  | -0.326878703 | -1.841048185 | 0.003382 | 0.073121 | 0.068399 | 378 |
| GOBP_REGULATION_OF_SPINDLE_ASSEMBLY                                  | GOBP_REGULATION_OF_SPINDLE_ASSEMBLY                                  | GOBP_REGULATION_OF_SPINDLE_ASSEMBLY                                  | 5   | 0.78017381   | 1.9755469    | 0.003497 | 0.075460 | 0.070586 | 92  |
| GOBP_POSITIVE_REGULATION_OF_B_CELL_DIFFERENTIATION                   | GOBP_POSITIVE_REGULATION_OF_B_CELL_DIFFERENTIATION                   | GOBP_POSITIVE_REGULATION_OF_B_CELL_DIFFERENTIATION                   | 3   | -0.852166525 | -1.697393131 | 0.003583 | 0.077160 | 0.072177 | 178 |
| GOBP_POSITIVE_REGULATION_OF_MOLECULAR_FUNCTION                       | GOBP_POSITIVE_REGULATION_OF_MOLECULAR_FUNCTION                       | GOBP_POSITIVE_REGULATION_OF_MOLECULAR_FUNCTION                       | 129 | 0.19143726   | 1.678518008  | 0.003598 | 0.077361 | 0.072365 | 56  |
| HP_FETAL_DISTRESS                                                    | HP_FETAL_DISTRESS                                                    | HP_FETAL_DISTRESS                                                    | 7</ |              |              |          |          |          |     |

|                                                                                                 |                                                                                                 |                                                                                                 |     |              |              |           |           |           |     |
|-------------------------------------------------------------------------------------------------|-------------------------------------------------------------------------------------------------|-------------------------------------------------------------------------------------------------|-----|--------------|--------------|-----------|-----------|-----------|-----|
| GOBP_REGULATION_OF_MICROTUBULE_POLYMERIZATION                                                   | GOBP_REGULATION_OF_MICROTUBULE_POLYMERIZATION                                                   | GOBP_REGULATION_OF_MICROTUBULE_POLYMERIZATION                                                   | 7   | 0.637654427  | 1.918857353  | 0.0057241 | 0.1121701 | 0.1049258 | 7   |
| GOBP_REGULATION_OF_MICROTUBULE_POLYMERIZATION_OR_DEPOLYMERIZATION                               | GOBP_REGULATION_OF_MICROTUBULE_POLYMERIZATION_OR_DEPOLYMERIZATION                               | GOBP_REGULATION_OF_MICROTUBULE_POLYMERIZATION_OR_DEPOLYMERIZATION                               | 7   | 0.637654427  | 1.918857353  | 0.0057241 | 0.1121701 | 0.1049258 | 7   |
| GOBP_NEGATIVE_REGULATION_OF_TRANSCRIPTION_BY_RNA_POLYMERASE_II                                  | GOBP_NEGATIVE_REGULATION_OF_TRANSCRIPTION_BY_RNA_POLYMERASE_II                                  | GOBP_NEGATIVE_REGULATION_OF_TRANSCRIPTION_BY_RNA_POLYMERASE_II                                  | 89  | 0.222258553  | 1.790320548  | 0.0058671 | 0.1147693 | 0.1073511 | 82  |
| GOBP_POSITIVE_REGULATION_OF_VASCULATURE_DEVELOPMENT                                             | GOBP_POSITIVE_REGULATION_OF_VASCULATURE_DEVELOPMENT                                             | GOBP_POSITIVE_REGULATION_OF_VASCULATURE_DEVELOPMENT                                             | 10  | 0.563535693  | 1.979768404  | 0.0058841 | 0.1148161 | 0.1074011 | 98  |
| GOCC_ORGANELLE_ENVELOPE_LUMEN                                                                   | GOCC_ORGANELLE_ENVELOPE_LUMEN                                                                   | GOCC_ORGANELLE_ENVELOPE_LUMEN                                                                   | 9   | 0.613174922  | 2.060046049  | 0.0058841 | 0.1148161 | 0.1074011 | 97  |
| GOBP_POSITIVE_REGULATION_OF_MYELOID_CELL_DIFFERENTIATION                                        | GOBP_POSITIVE_REGULATION_OF_MYELOID_CELL_DIFFERENTIATION                                        | GOBP_POSITIVE_REGULATION_OF_MYELOID_CELL_DIFFERENTIATION                                        | 11  | 0.536333839  | 1.994059438  | 0.0059011 | 0.1148161 | 0.1074011 | 36  |
| GOMF_FK506_BINDING                                                                              | GOMF_FK506_BINDING                                                                              | GOMF_FK506_BINDING                                                                              | 14  | 0.827380952  | 1.906875307  | 0.0059433 | 0.1152111 | 0.1077701 | 207 |
| GOMF_MACROLIDE_BINDING                                                                          | GOMF_MACROLIDE_BINDING                                                                          | GOMF_MACROLIDE_BINDING                                                                          | 4   | 0.827380952  | 1.906875307  | 0.0059433 | 0.1152111 | 0.1077701 | 207 |
| GOMF_ATP_DEPENDENT_ACTIVITY                                                                     | GOMF_ATP_DEPENDENT_ACTIVITY                                                                     | GOMF_ATP_DEPENDENT_ACTIVITY                                                                     | 52  | 0.26312553   | 1.788089063  | 0.0060271 | 0.1166261 | 0.1090931 | 72  |
| GOMF_CHONDROITIN_SULFATE_BINDING                                                                | GOMF_CHONDROITIN_SULFATE_BINDING                                                                | GOMF_CHONDROITIN_SULFATE_BINDING                                                                | 1   | -0.999151824 | -1.325832744 | 0.0060391 | 0.1166511 | 0.1091171 | 3   |
| GOMF_PROTEIN_TAG                                                                                | GOMF_PROTEIN_TAG                                                                                | GOMF_PROTEIN_TAG                                                                                | 4   | 0.8265680272 | 1.902955728  | 0.0062381 | 0.1202811 | 0.1125131 | 209 |
| GOBP_TRANSFORMING_GROWTH_FACTOR_BETA_RECEPTOR_SIGNALING_PATHWAY                                 | GOBP_TRANSFORMING_GROWTH_FACTOR_BETA_RECEPTOR_SIGNALING_PATHWAY                                 | GOBP_TRANSFORMING_GROWTH_FACTOR_BETA_RECEPTOR_SIGNALING_PATHWAY                                 | 23  | 0.38132121   | 1.911084709  | 0.0063091 | 0.1212991 | 0.1133461 | 20  |
| GOCC_CHROMOSOME                                                                                 | GOCC_CHROMOSOME                                                                                 | GOCC_CHROMOSOME                                                                                 | 170 | -0.230743342 | -1.606007399 | 0.0063321 | 0.1212991 | 0.1133461 | 331 |
| GOBP_METENCEPHALON_DEVELOPMENT                                                                  | GOBP_METENCEPHALON_DEVELOPMENT                                                                  | GOBP_METENCEPHALON_DEVELOPMENT                                                                  | 13  | -0.542595816 | -1.859865676 | 0.0063241 | 0.1212991 | 0.1133461 | 351 |
| GOBP_POSITIVE_REGULATION_OF_INTRINSIC_APOPTOTIC_SIGNALING_PATHWAY_BY_P                          | GOBP_POSITIVE_REGULATION_OF_INTRINSIC_APOPTOTIC_SIGNALING_PATHWAY_BY_P                          | GOBP_POSITIVE_REGULATION_OF_INTRINSIC_APOPTOTIC_SIGNALING_PATHWAY_BY_P                          | 3   | 0.871707732  | 1.784944051  | 0.0063631 | 0.1218441 | 0.1139751 | 154 |
| HP_AORTIC_ROOT_ANEURYSM                                                                         | HP_AORTIC_ROOT_ANEURYSM                                                                         | HP_AORTIC_ROOT_ANEURYSM                                                                         | 10  | -0.609275665 | -1.923419408 | 0.0063811 | 0.1219731 | 0.1140961 | 177 |
| GOBP_REGULATION_OF_LEUKOCYTE_MEDIATED_IMMUNITY                                                  | GOBP_REGULATION_OF_LEUKOCYTE_MEDIATED_IMMUNITY                                                  | GOBP_REGULATION_OF_LEUKOCYTE_MEDIATED_IMMUNITY                                                  | 23  | -0.44351089  | -1.858815047 | 0.0064081 | 0.1222591 | 0.1143631 | 266 |
| HP_ARNOLD_CHIARI_TYPE_I_MALFORMATION                                                            | HP_ARNOLD_CHIARI_TYPE_I_MALFORMATION                                                            | HP_ARNOLD_CHIARI_TYPE_I_MALFORMATION                                                            | 5   | -0.751489362 | -1.81762764  | 0.0064231 | 0.1223321 | 0.1144311 | 298 |
| GOBP_DECIDUALIZATION                                                                            | GOBP_DECIDUALIZATION                                                                            | GOBP_DECIDUALIZATION                                                                            | 3   | 0.870858114  | 1.78320434   | 0.0064591 | 0.1228121 | 0.1148801 | 155 |
| HP_HYPERTRICHOSIS                                                                               | HP_HYPERTRICHOSIS                                                                               | HP_HYPERTRICHOSIS                                                                               | 43  | -0.357757041 | -1.816573792 | 0.0064791 | 0.1229701 | 0.1150281 | 177 |
| GOBP_SKELETAL_MUSCLE_CELL_DIFFERENTIATION                                                       | GOBP_SKELETAL_MUSCLE_CELL_DIFFERENTIATION                                                       | GOBP_SKELETAL_MUSCLE_CELL_DIFFERENTIATION                                                       | 8   | 0.595650278  | 1.907402984  | 0.0065741 | 0.1245511 | 0.1165071 | 75  |
| HP_RECURRENT_FEVER                                                                              | HP_RECURRENT_FEVER                                                                              | HP_RECURRENT_FEVER                                                                              | 4   | -0.766301928 | -1.715343804 | 0.0066091 | 0.1250141 | 0.1169401 | 125 |
| GOBP_NEGATIVE_REGULATION_OF_OXIDATIVE_STRESS_INDUCED_INTRINSIC_APOPTOTIC_SIGNALING_PATHWAY_BY_P | GOBP_NEGATIVE_REGULATION_OF_OXIDATIVE_STRESS_INDUCED_INTRINSIC_APOPTOTIC_SIGNALING_PATHWAY_BY_P | GOBP_NEGATIVE_REGULATION_OF_OXIDATIVE_STRESS_INDUCED_INTRINSIC_APOPTOTIC_SIGNALING_PATHWAY_BY_P | 4   | 0.823897062  | 1.898845941  | 0.0066301 | 0.1250881 | 0.1170091 | 98  |
| GOBP_EXPORT_ACROSS_PLASMA_MEMBRANE                                                              | GOBP_EXPORT_ACROSS_PLASMA_MEMBRANE                                                              | GOBP_EXPORT_ACROSS_PLASMA_MEMBRANE                                                              | 2   | -0.925297114 | -1.572323298 | 0.0066481 | 0.1250881 | 0.1170091 | 91  |
| GOBP_METAL_ION_EXPORT                                                                           | GOBP_METAL_ION_EXPORT                                                                           | GOBP_METAL_ION_EXPORT                                                                           | 2   | -0.925297114 | -1.572323298 | 0.0066481 | 0.1250881 | 0.1170091 | 91  |
| GOBP_REGULATION_OF_DNA_BINDING                                                                  | GOBP_REGULATION_OF_DNA_BINDING                                                                  | GOBP_REGULATION_OF_DNA_BINDING                                                                  | 6   | 0.444712291  | 1.926683352  | 0.0067931 | 0.1274091 | 0.1191801 | 67  |
| HP_GAIT_DISTURBANCE                                                                             | HP_GAIT_DISTURBANCE                                                                             | HP_GAIT_DISTURBANCE                                                                             | 113 | -0.266381936 | -1.710923122 | 0.0067951 | 0.1274091 | 0.1191801 | 211 |
| GOBP_POSITIVE_REGULATION_OF_MICROTUBULE_POLYMERIZATION_OR_DEPOLYMERIZATION                      | GOBP_POSITIVE_REGULATION_OF_MICROTUBULE_POLYMERIZATION_OR_DEPOLYMERIZATION                      | GOBP_POSITIVE_REGULATION_OF_MICROTUBULE_POLYMERIZATION_OR_DEPOLYMERIZATION                      | 6   | 0.692956257  | 1.94147811   | 0.0068191 | 0.1274971 | 0.1192631 | 7   |
| GOMF_PROTEIN_DISAGGREGASE_ACTIVITY                                                              | GOMF_PROTEIN_DISAGGREGASE_ACTIVITY                                                              | GOMF_PROTEIN_DISAGGREGASE_ACTIVITY                                                              | 4   | 0.823142946  | 1.89710792   | 0.0068271 | 0.1274971 | 0.1192631 | 7   |
| GOBP_RESPONSE_TO_MUSCLE_STRETCH                                                                 | GOBP_RESPONSE_TO_MUSCLE_STRETCH                                                                 | GOBP_RESPONSE_TO_MUSCLE_STRETCH                                                                 | 5   | 0.747797134  | 1.893563066  | 0.0068351 | 0.1274971 | 0.1192631 | 26  |
| GOBP_NEGATIVE_REGULATION_OF_PROTEIN_MODIFICATION_BY_SMALL_PROTEIN_CONJUGATION                   | GOBP_NEGATIVE_REGULATION_OF_PROTEIN_MODIFICATION_BY_SMALL_PROTEIN_CONJUGATION                   | GOBP_NEGATIVE_REGULATION_OF_PROTEIN_MODIFICATION_BY_SMALL_PROTEIN_CONJUGATION                   | 15  | 0.47774012   | 2.016147125  | 0.0068861 | 0.1282331 | 0.1195011 | 164 |
| GOBP_TUBE_MORPHOGENESIS                                                                         | GOBP_TUBE_MORPHOGENESIS                                                                         | GOBP_TUBE_MORPHOGENESIS                                                                         | 61  | 0.24884473   | 1.809133478  | 0.0069491 | 0.1291921 | 0.1209481 | 73  |
| GOBP_GRANULOCYTE_CHEMOTAXIS                                                                     | GOBP_GRANULOCYTE_CHEMOTAXIS                                                                     | GOBP_GRANULOCYTE_CHEMOTAXIS                                                                     | 7   | -0.642969825 | -1.760840498 | 0.0070301 | 0.1304651 | 0.1220391 | 76  |
| HP_ABNORMALITY_OF_THE_PULMONARY_ARTERY                                                          | HP_ABNORMALITY_OF_THE_PULMONARY_ARTERY                                                          | HP_ABNORMALITY_OF_THE_PULMONARY_ARTERY                                                          | 13  | -0.53830556  | -1.845150858 | 0.0071071 | 0.1316821 | 0.1231771 | 177 |
| HP_HIGH_FOREHEAD                                                                                | HP_HIGH_FOREHEAD                                                                                | HP_HIGH_FOREHEAD                                                                                | 29  | -0.404778422 | -1.808103121 | 0.0071751 | 0.1327041 | 0.1241331 | 437 |
| HP_GASTRITIS                                                                                    | HP_GASTRITIS                                                                                    | HP_GASTRITIS                                                                                    | 3   | -0.827527613 | -1.648315961 | 0.0072011 | 0.1328171 | 0.1242391 | 207 |
| GOBP_POSITIVE_REGULATION_OF_PROTEOLYSIS                                                         | GOBP_POSITIVE_REGULATION_OF_PROTEOLYSIS                                                         | GOBP_POSITIVE_REGULATION_OF_PROTEOLYSIS                                                         | 42  | 0.271965042  | 1.735479358  | 0.0072051 | 0.1328171 | 0.1242391 | 46  |
| GOBP_REGULATION_OF_MYELOID_CELL_DIFFERENTIATION                                                 | GOBP_REGULATION_OF_MYELOID_CELL_DIFFERENTIATION                                                 | GOBP_REGULATION_OF_MYELOID_CELL_DIFFERENTIATION                                                 | 25  | 0.372185745  | 1.964361164  | 0.0073681 | 0.1355951 | 0.1268331 | 57  |
| GOBP_EMBRYONIC_PROCESS_INVOLVED_IN_FEMALE_PREGNANCY                                             | GOBP_EMBRYONIC_PROCESS_INVOLVED_IN_FEMALE_PREGNANCY                                             | GOBP_EMBRYONIC_PROCESS_INVOLVED_IN_FEMALE_PREGNANCY                                             | 2   | 0.939728353  | 1.640487875  | 0.0073971 | 0.1358971 | 0.1271201 | 73  |
| GOMF_HISTONE_DEACETYLASE_BINDING                                                                | GOMF_HISTONE_DEACETYLASE_BINDING                                                                | GOMF_HISTONE_DEACETYLASE_BINDING                                                                | 15  | 0.475422869  | 2.006367918  | 0.0074641 | 0.1368991 | 0.1280571 | 20  |
| HP_DUPLICATION_OF_HAND_BONES                                                                    | HP_DUPLICATION_OF_HAND_BONES                                                                    | HP_DUPLICATION_OF_HAND_BONES                                                                    | 25  | 0.371809051  | 1.962367729  | 0.0074961 | 0.1370461 | 0.1281951 | 309 |
| GOBP_NEGATIVE_REGULATION_OF_MITOCHONDRIAL_OUTER_MEMBRANE_PERMEABILITY                           | GOBP_NEGATIVE_REGULATION_OF_MITOCHONDRIAL_OUTER_MEMBRANE_PERMEABILITY                           | GOBP_NEGATIVE_REGULATION_OF_MITOCHONDRIAL_OUTER_MEMBRANE_PERMEABILITY                           | 1   | 0.999151824  | 1.531775251  | 0.0074981 | 0.1370461 | 0.1281951 | 2   |
| HP_PERIPHERAL_AXONAL_NEUROPATHY                                                                 | HP_PERIPHERAL_AXONAL_NEUROPATHY                                                                 | HP_PERIPHERAL_AXONAL_NEUROPATHY                                                                 | 21  | -0.439313454 | -1.770861596 | 0.0076031 | 0.1387311 | 0.1297711 | 94  |
| GOBP_POSITIVE_REGULATION_OF_CELL_PROLIFERATION_INVOLVED_IN_KIDNEY_DEVELOPMENT                   | GOBP_POSITIVE_REGULATION_OF_CELL_PROLIFERATION_INVOLVED_IN_KIDNEY_DEVELOPMENT                   | GOBP_POSITIVE_REGULATION_OF_CELL_PROLIFERATION_INVOLVED_IN_KIDNEY_DEVELOPMENT                   | 2   | 0.93803056   | 1.637524031  | 0.0076731 | 0.1397811 | 0.1307531 | 75  |
| GOBP_MITOCHONDRIAL_MEMBRANE_ORGANIZATION                                                        | GOBP_MITOCHONDRIAL_MEMBRANE_ORGANIZATION                                                        | GOBP_MITOCHONDRIAL_MEMBRANE_ORGANIZATION                                                        | 15  | 0.473001708  | 1.996150196  | 0.0076961 | 0.1397911 | 0.1307631 | 97  |
| GOMF_GUANYL_NUCLEOTIDE_BINDING                                                                  | GOMF_GUANYL_NUCLEOTIDE_BINDING                                                                  | GOMF_GUANYL_NUCLEOTIDE_BINDING                                                                  | 27  | 0.361558831  | 1.951711432  | 0.0076991 | 0.1397911 | 0.1307631 | 161 |
| GOBP_RESPONSE_TO_AXON_INJURY                                                                    | GOBP_RESPONSE_TO_AXON_INJURY                                                                    | GOBP_RESPONSE_TO_AXON_INJURY                                                                    | 7   | 0.619286559  | 1.863583965  | 0.0077151 | 0.1398461 | 0.1308141 | 131 |
| GOBP_NEGATIVE_REGULATION_OF_NUCLEOBASE_CONTAINING_COMPOUND_METABOLISM                           | GOBP_NEGATIVE_REGULATION_OF_NUCLEOBASE_CONTAINING_COMPOUND_METABOLISM                           | GOBP_NEGATIVE_REGULATION_OF_NUCLEOBASE_CONTAINING_COMPOUND_METABOLISM                           | 144 | 0.177831117  | 1.59455392   | 0.0077751 | 0.1406841 | 0.1315981 | 111 |
| GOBP_BLOOD_VESSEL_ENDOTHELIAL_CELL_MIGRATION                                                    | GOBP_BLOOD_VESSEL_ENDOTHELIAL_CELL_MIGRATION                                                    | GOBP_BLOOD_VESSEL_ENDOTHELIAL_CELL_MIGRATION                                                    | 14  | 0.473621097  | 1.914499242  | 0.0077871 | 0.1406841 | 0.1315981 | 98  |
| GOMF_HSP70_PROTEIN_BINDING                                                                      | GOMF_HSP70_PROTEIN_BINDING                                                                      | GOMF_HSP70_PROTEIN_BINDING                                                                      | 5   | 0.741926267  | 1.876969625  | 0.0078041 | 0.1407531 | 0.1316621 | 17  |
| GOBP_NEGATIVE_REGULATION_OF_CELL_POPULATION_PROLIFERATION                                       | GOBP_NEGATIVE_REGULATION_OF_CELL_POPULATION_PROLIFERATION                                       | GOBP_NEGATIVE_REGULATION_OF_CELL_POPULATION_PROLIFERATION                                       | 57  | 0.282196895  | 1.851510781  | 0.0078791 | 0.1418751 | 0.1327121 | 55  |
| HP_PHARYNGITIS                                                                                  | HP_PHARYNGITIS                                                                                  | HP_PHARYNGITIS                                                                                  | 3   | -0.824129142 | -1.641546697 | 0.0079271 | 0.1424161 | 0.1332181 | 211 |
| GOBP_LEUKOCYTE_MEDIATED_IMMUNITY                                                                | GOBP_LEUKOCYTE_MEDIATED_IMMUNITY                                                                | GOBP_LEUKOCYTE_MEDIATED_IMMUNITY                                                                | 35  | -0.377946412 | -1.840207217 | 0.0079391 | 0.1424161 | 0.1332181 | 266 |
| GOBP_MICROTUBULE_BASED_MOVEMENT                                                                 | GOBP_MICROTUBULE_BASED_MOVEMENT                                                                 | GOBP_MICROTUBULE_BASED_MOVEMENT                                                                 | 13  | 0.490265219  | 1.954559413  | 0.0079671 | 0.1424161 | 0.1332181 | 14  |
| GOCC_ION_CHANNEL_COMPLEX                                                                        | GOCC_ION_CHANNEL_COMPLEX                                                                        | GOCC_ION_CHANNEL_COMPLEX                                                                        | 7   | -0.634816771 | -1.738512503 | 0.0079751 | 0.1424161 | 0.1332181 | 157 |
| HP_BROAD_EYEBROW                                                                                | HP_BROAD_EYEBROW                                                                                | HP_BROAD_EYEBROW                                                                                | 7   | -0.6342711   | -1.737018125 | 0.0079751 | 0.1424161 | 0.1332181 | 437 |
| GOBP_NEURON_PROJECTION_REGENERATION                                                             | GOBP_NEURON_PROJECTION_REGENERATION                                                             | GOBP_NEURON_PROJECTION_REGENERATION                                                             | 6   | 0.685695182  | 1.921134521  | 0.0080141 | 0.1428791 | 0.1336501 | 131 |
| GOBP_REGULATION_OF_MICROTUBULE_CYTOSKELETON_ORGANIZATION                                        | GOBP_REGULATION_OF_MICROTUBULE_CYTOSKELETON_ORGANIZATION                                        | GOBP_REGULATION_OF_MICROTUBULE_CYTOSKELETON_ORGANIZATION                                        | 12  | 0.506795919  | 1.964371808  | 0.0081281 | 0.1446741 | 0.1353301 | 110 |
| GOBP_REGULATION_OF_PROTEIN_CONTAINING_COMPLEX_ASSEMBLY                                          | GOBP_REGULATION_OF_PROTEIN_CONTAINING_COMPLEX_ASSEMBLY                                          | GOBP_REGULATION_OF_PROTEIN_CONTAINING_COMPLEX_ASSEMBLY                                          | 40  | 0.276752358  | 1.712313952  | 0.0081711 | 0.1452091 | 0.1358311 | 34  |
| GOBP_ATP_METABOLIC_PROCESS                                                                      | GOBP_ATP_METABOLIC_PROCESS                                                                      | GOBP_ATP_METABOLIC_PROCESS                                                                      | 48  | -0.333998236 | -1.762517283 | 0.0082321 | 0.1459131 | 0.1364891 | 117 |
| GOBP_RESPONSE_TO_XENOBIOTIC_STIMULUS                                                            | GOBP_RESPONSE_TO_XENOBIOTIC_STIMULUS                                                            | GOBP_RESPONSE_TO_XENOBIOTIC_STIMULUS                                                            | 23  | 0.373123845  | 1.870001603  | 0.0082521 | 0.1459131 | 0.1364891 | 185 |
| GOBP_NEGATIVE_REGULATION_OF_SIGNAL_TRANSDUCTION_IN_ABSENCE_OF_LIGAND                            | GOBP_NEGATIVE_REGULATION_OF_SIGNAL_TRANSDUCTION_IN_ABSENCE_OF_LIGAND                            | GOBP_NEGATIVE_REGULATION_OF_SIGNAL_TRANSDUCTION_IN_ABSENCE_OF_LIGAND                            | 3   | 0.863281972  | 1.767691125  | 0.0082771 | 0.1459131 | 0.1364891 | 7   |
| GOBP_REGULATION_OF_EXTRINSIC_APOPTOTIC_SIGNALING_PATHWAY_IN_ABSENCE_OF_LIGAND                   | GOBP_REGULATION_OF_EXTRINSIC_APOPTOTIC_SIGNALING_PATHWAY_IN_ABSENCE_OF_LIGAND                   | GOBP_REGULATION_OF_EXTRINSIC_APOPTOTIC_SIGNALING_PATHWAY_IN_ABSENCE_OF_LIGAND                   | 3   | 0.863281972  | 1.767691125  | 0.0082771 | 0.1459131 | 0.1364891 | 7   |
| GOBP_POSITIVE_REGULATION_OF_RNA_SPLICING                                                        | GOBP_POSITIVE_REGULATION_OF_RNA_SPLICING                                                        | GOBP_POSITIVE_REGULATION_OF_RNA_SPLICING                                                        | 11  | 0.522141267  | 1.941274148  | 0.0082841 | 0.1459131 | 0.1364891 | 41  |
| GOBP_IMPORT_INTO_CELL                                                                           | GOBP_IMPORT_INTO_CELL                                                                           | GOBP_IMPORT_INTO_CELL                                                                           | 10  | -0.5962926   | -1.882433231 | 0.0083021 | 0.1459131 | 0.1364891 | 41  |
| HP_LANGUAGE_IMPAIRMENT                                                                          | HP_LANGUAGE_IMPAIRMENT                                                                          | HP_LANGUAGE_IMPAIRMENT                                                                          | 97  | -0.262773359 | -1.635422276 | 0.0083051 | 0.1459131 | 0.1364891 | 442 |
| HP_CLINODACTYLY                                                                                 | HP_CLINODACTYLY                                                                                 | HP_CLINODACTYLY                                                                                 | 57  | -0.308103753 | -1.701016693 | 0.0083181 | 0.1459131 | 0.1364891 | 442 |
| GOBP_MULTI_MULTICELLULAR_ORGANISM_PROCESS                                                       | GOBP_MULTI_MULTICELLULAR_ORGANISM_PROCESS                                                       | GOBP_MULTI_MULTICELLULAR_ORGANISM_PROCESS                                                       | 14  | 0.468598159  | 1.894195225  | 0.0083641 | 0.1460081 | 0.1365781 | 155 |
| GOBP_NEGATIVE_REGULATION_OF_UBIQUITIN_PROTEIN_LIGASE_ACTIVITY                                   | GOBP_NEGATIVE_REGULATION_OF_UBIQUITIN_PROTEIN_LIGASE_ACTIVITY                                   | GOBP_NEGATIVE_REGULATION_OF_UBIQUITIN_PROTEIN_LIGASE_ACTIVITY                                   | 3   | 0.863211555  | 1.767546936  | 0.0083731 | 0.1460081 | 0.1365781 | 164 |
| GOMF_UBIQUITIN_PROTEIN_TRANSFERASE_INHIBITOR_ACTIVITY                                           | GOMF_UBIQUITIN_PROTEIN_TRANSFERASE_INHIBITOR_ACTIVITY                                           | GOMF_UBIQUITIN_PROTEIN_TRANSFERASE_INHIBITOR_ACTIVITY                                           | 3   | 0.863211555  | 1.767546936  | 0.0083731 | 0.1460081 | 0.1365781 | 164 |
| HP_ABNORMAL_MYOCARDIUM_MORPHOLOGY                                                               | HP_ABNORMAL_MYOCARDIUM_MORPHOLOGY                                                               | HP_ABNORMAL_MYOCARDIUM_MORPHOLOGY                                                               | 27  | -0.357063378 | -1.744347494 | 0.0083771 | 0.1460081 | 0.1365781 | 222 |
| GOBP_EXTRINSIC_APOPTOTIC_SIGNALING_PATHWAY                                                      | GOBP_EXTRINSIC_APOPTOTIC_SIGNALING_PATHWAY                                                      | GOBP_EXTRINSIC_APOPTOTIC_SIGNALING_PATHWAY                                                      | 38  | 0.356098256  | 1.92223499   | 0.0087171 | 0.1514481 | 0.1416681 | 42  |
| GOBP_RIBOSOMAL_SMALL_SUBUNIT_BIOGENESIS                                                         | GOBP_RIBOSOMAL_SMALL_SUBUNIT_BIOGENESIS                                                         | GOBP_RIBOSOMAL_SMALL_SUBUNIT_BIOGENESIS                                                         | 22  | 0.384719473  | 1.895926351  | 0.0087171 | 0.1514481 | 0.1416681 | 277 |
| GOBP_CELLULAR_RESPONSE_TO_CALCIIUM_ION                                                          | GOBP_CELLULAR_RESPONSE_TO_CALCIIUM_ION                                                          | GOBP_CELLULAR_RESPONSE_TO_CALCIIUM_ION                                                          | 8   | 0.81554497   | 1.86223469   | 0.0087821 | 0.1523201 | 0.1424821 | 82  |
| GOBP_SIGNAL_TRANSDUCTION_IN_ABSENCE_OF_LIGAND                                                   | GOBP_SIGNAL_TRANSDUCTION_IN_ABSENCE_OF_LIGAND                                                   | GOBP_SIGNAL_TRANSDUCTION_IN_ABSENCE_OF_LIGAND                                                   | 5   | 0.734197199  | 1.85912547   | 0.0087911 | 0.1535341 | 0.1436181 | 7   |
| HP_GASTROINTESTINAL_INFLAMMATION                                                                | HP_GASTROINTESTINAL_INFLAMMATION                                                                | HP_GASTROINTESTINAL_INFLAMMATION                                                                | 12  | -0.541383197 | -1.802158923 | 0.0088001 | 0.1535341 | 0.1436181 | 370 |
| GOMF_TRANSCRIPTION_REGULATOR_ACTIVITY                                                           | GOMF_TRANSCRIPTION_REGULATOR_ACTIVITY                                                           | GOMF_TRANSCRIPTION_REGULATOR_ACTIVITY                                                           | 141 | 0.176272452  | 1.588097242  | 0.0090241 | 0.1557711 | 0.1457101 | 82  |
| GOBP_REGULATION_OF_PEPTIDASE_ACTIVITY                                                           | GOBP_REGULATION_OF_PEPTIDASE_ACTIVITY                                                           | GOBP_REGULATION_OF_PEPTIDASE_ACTIVITY                                                           | 41  | 0.288872699  | 1.808103861  | 0.0094011 | 0.1558311 | 0.1457671 | 46  |
| HP_ABNORMAL_LATERAL_VENTRICLE_MORPHOLOGY                                                        | HP_ABNORMAL_LATERAL_VENTRICLE_MORPHOLOGY                                                        | HP_ABNORMAL_LATERAL_VENTRICLE_MORPHOLOGY                                                        | 18  | -0.470684736 | -1.827933694 | 0.0096091 | 0.1562701 | 0.1461781 | 320 |
| GOBP_HISTONE_MODIFICATION                                                                       | GOBP_HISTONE_MODIFICATION                                                                       | GOBP_HISTONE_MODIFICATION                                                                       | 6   | -0.31431096  | -1.775664893 | 0.0091111 | 0.1562701 | 0.1461781 | 559 |
| GOBP_NEGATIVE_REGULATION_OF_MACROAUTOPHAGY                                                      | GOBP_NEGATIVE_REGULATION_OF_MACROAUTOPHAGY                                                      | GOBP_NEGATIVE_REGULATION_OF_MACROAUTOPHAGY                                                      | 2   | -0.911714771 | -1.549243323 | 0.0091331 | 0.1562701 | 0.1461781 | 107 |
| GOBP_POSITIVE_REGULATION_OF_MICROTUBULE_NUCLEATION                                              | GOBP_POSITIVE_REGULATION_OF_MICROTUBULE_NUCLEATION                                              | GOBP_POSITIVE_REGULATION_OF_MICROTUBULE_NUCLEATION                                              | 3   | 0.859747487  | 1.760453771  | 0.0091391 | 0.1562701 | 0.1461781 | 7   |
| GOBP_REGULATION_OF_MICROTUBULE_NUCLEATION                                                       | GOBP_REGULATION_OF_MICROTUBULE_NUCLEATION                                                       | GOBP_REGULATION_OF_MICROTUBULE_NUCLEATION                                                       | 3   | 0.859747487  | 1.760453771  | 0.0091391 | 0.1562701 | 0.1461781 | 7   |
| GOBP_AMEBOIDAL_TYPE_CELL_MIGRATION                                                              | GOBP_AMEBOIDAL_TYPE_CELL_MIGRATION                                                              | GOBP_AMEBOIDAL_TYPE_CELL_MIGRATION                                                              | 34  | 0.314703032  | 1.857251867  | 0.0092581 | 0.1577531 | 0.1475641 | 42  |
| HP_HYPERREFLEXIA                                                                                | HP_HYPERREFLEXIA                                                                                | HP_HYPERREFLEXIA                                                                                | 58  | -0.314141214 | -1.74565016  | 0.0092801 | 0.1577531 | 0.1475641 | 304 |
| GOBP_MICROTUBULE_POLYMERIZATION                                                                 | GOBP_MICROTUBULE_POLYMERIZATION                                                                 | GOBP_MICROTUBULE_POLYMERIZATION                                                                 | 8   | 0.578102768  |              |           |           |           |     |

|                                                                                        |                                                                                        |                                                                                        |     |              |              |           |           |           |     |
|----------------------------------------------------------------------------------------|----------------------------------------------------------------------------------------|----------------------------------------------------------------------------------------|-----|--------------|--------------|-----------|-----------|-----------|-----|
| GOBP_POSITIVE_REGULATION_OF_APOPTOTIC_SIGNALING_PATHWAY                                | GOBP_POSITIVE_REGULATION_OF_APOPTOTIC_SIGNALING_PATHWAY                                | GOBP_POSITIVE_REGULATION_OF_APOPTOTIC_SIGNALING_PATHWAY                                | 18  | 0.416260631  | 1.910379551  | 0.0122821 | 0.1919141 | 0.1795191 | 98  |
| HP_FRONTAL_LOBE_DEMENTIA                                                               | HP_FRONTAL_LOBE_DEMENTIA                                                               | HP_FRONTAL_LOBE_DEMENTIA                                                               | 2   | 0.919354839  | 1.604921742  | 0.0122821 | 0.1919141 | 0.1795191 | 97  |
| GOBP_AXO_DENDRITIC_PROTEIN_TRANSPORT                                                   | GOBP_AXO_DENDRITIC_PROTEIN_TRANSPORT                                                   | GOBP_AXO_DENDRITIC_PROTEIN_TRANSPORT                                                   | 1   | 0.998303647  | 1.330644712  | 0.0124061 | 0.1919141 | 0.1795191 | 3   |
| GOBP_POSITIVE_REGULATION_OF_ENDOTHELIAL_CELL_CHEMOTAXIS_BY_VEGF_ACTIVATION             | GOBP_POSITIVE_REGULATION_OF_ENDOTHELIAL_CELL_CHEMOTAXIS_BY_VEGF_ACTIVATION             | GOBP_POSITIVE_REGULATION_OF_ENDOTHELIAL_CELL_CHEMOTAXIS_BY_VEGF_ACTIVATION             | 1   | 0.998303647  | 1.330644712  | 0.0124061 | 0.1919141 | 0.1795191 | 3   |
| GOBP_PROTEIN_LOCALIZATION_TO_PRESYNAPSE                                                | GOBP_PROTEIN_LOCALIZATION_TO_PRESYNAPSE                                                | GOBP_PROTEIN_LOCALIZATION_TO_PRESYNAPSE                                                | 1   | 0.998303647  | 1.330644712  | 0.0124061 | 0.1919141 | 0.1795191 | 3   |
| GOBP_PROTEIN_TRANSPORT_ALONG_MICROTUBULE                                               | GOBP_PROTEIN_TRANSPORT_ALONG_MICROTUBULE                                               | GOBP_PROTEIN_TRANSPORT_ALONG_MICROTUBULE                                               | 1   | 0.998303647  | 1.330644712  | 0.0124061 | 0.1919141 | 0.1795191 | 3   |
| HP_DISTAL_LOWER_LIMB_AMYOTROPHY                                                        | HP_DISTAL_LOWER_LIMB_AMYOTROPHY                                                        | HP_DISTAL_LOWER_LIMB_AMYOTROPHY                                                        | 1   | 0.998303647  | 1.330644712  | 0.0124061 | 0.1919141 | 0.1795191 | 3   |
| HP_IMPAIRED_TEMPERATURE_SENSATION                                                      | HP_IMPAIRED_TEMPERATURE_SENSATION                                                      | HP_IMPAIRED_TEMPERATURE_SENSATION                                                      | 1   | 0.998303647  | 1.330644712  | 0.0124061 | 0.1919141 | 0.1795191 | 3   |
| HP_LIMB_FASCICULATIONS                                                                 | HP_LIMB_FASCICULATIONS                                                                 | HP_LIMB_FASCICULATIONS                                                                 | 1   | 0.998303647  | 1.330644712  | 0.0124061 | 0.1919141 | 0.1795191 | 3   |
| HP_ULNAR_CLAW                                                                          | HP_ULNAR_CLAW                                                                          | HP_ULNAR_CLAW                                                                          | 1   | 0.998303647  | 1.330644712  | 0.0124061 | 0.1919141 | 0.1795191 | 3   |
| HP_MUSCLE_FIBRILLATION                                                                 | HP_MUSCLE_FIBRILLATION                                                                 | HP_MUSCLE_FIBRILLATION                                                                 | 8   | 0.561601734  | 1.798372068  | 0.0124061 | 0.1919141 | 0.1795191 | 408 |
| HP_SUBMUCOUS_CLEFT_OF_SOFT_AND_HARD_PALATE                                             | HP_SUBMUCOUS_CLEFT_OF_SOFT_AND_HARD_PALATE                                             | HP_SUBMUCOUS_CLEFT_OF_SOFT_AND_HARD_PALATE                                             | 5   | -0.725828264 | -1.755561131 | 0.0124277 | 0.1919681 | 0.1795698 | 164 |
| GOBP_REGULATION_OF_POTASSIUM_ION_TRANSPORT                                             | GOBP_REGULATION_OF_POTASSIUM_ION_TRANSPORT                                             | GOBP_REGULATION_OF_POTASSIUM_ION_TRANSPORT                                             | 7   | -0.614019134 | -1.681555987 | 0.0124677 | 0.1923216 | 0.1798955 | 91  |
| GOBP_RESPONSE_TO_TUMOR_NECROSIS_FACTOR                                                 | GOBP_RESPONSE_TO_TUMOR_NECROSIS_FACTOR                                                 | GOBP_RESPONSE_TO_TUMOR_NECROSIS_FACTOR                                                 | 27  | 0.339166892  | 1.830838688  | 0.0125359 | 0.1930033 | 0.1806566 | 135 |
| GOBP_RESPONSE_TO_STEROID_HORMONE                                                       | GOBP_RESPONSE_TO_STEROID_HORMONE                                                       | GOBP_RESPONSE_TO_STEROID_HORMONE                                                       | 33  | 0.331833692  | 1.931037335  | 0.0125507 | 0.1930033 | 0.1806566 | 131 |
| GOBP_POSITIVE_REGULATION_OF_SMALL_GTPASE_MEDIATED_SIGNAL_TRANSDUCTION                  | GOBP_POSITIVE_REGULATION_OF_SMALL_GTPASE_MEDIATED_SIGNAL_TRANSDUCTION                  | GOBP_POSITIVE_REGULATION_OF_SMALL_GTPASE_MEDIATED_SIGNAL_TRANSDUCTION                  | 4   | -0.738162017 | -1.652353461 | 0.0125677 | 0.1930033 | 0.1806566 | 159 |
| GOBP_VASCULATURE_DEVELOPMENT                                                           | GOBP_VASCULATURE_DEVELOPMENT                                                           | GOBP_VASCULATURE_DEVELOPMENT                                                           | 62  | 0.245470634  | 1.799322572  | 0.0125851 | 0.1930403 | 0.1805751 | 128 |
| HP_STEREOTYPY                                                                          | HP_STEREOTYPY                                                                          | HP_STEREOTYPY                                                                          | 42  | -0.336768244 | -1.70609095  | 0.0127511 | 0.1947961 | 0.1822151 | 441 |
| HP_DELAYED_ABILITY_TO_ROLL_OVER                                                        | HP_DELAYED_ABILITY_TO_ROLL_OVER                                                        | HP_DELAYED_ABILITY_TO_ROLL_OVER                                                        | 3   | -0.800339847 | -1.594161844 | 0.0127711 | 0.1947961 | 0.1822151 | 239 |
| HP_DEVELOPMENTAL_STAGNATION                                                            | HP_DEVELOPMENTAL_STAGNATION                                                            | HP_DEVELOPMENTAL_STAGNATION                                                            | 3   | -0.800339847 | -1.594161844 | 0.0127711 | 0.1947961 | 0.1822151 | 239 |
| HP_REPETITIVE_COMPULSIVE_BEHAVIOR                                                      | HP_REPETITIVE_COMPULSIVE_BEHAVIOR                                                      | HP_REPETITIVE_COMPULSIVE_BEHAVIOR                                                      | 3   | -0.800339847 | -1.594161844 | 0.0127711 | 0.1947961 | 0.1822151 | 239 |
| GOBP_PEROXISOME_PROLIFERATOR_ACTIVATED_RECEPTOR_SIGNALING_PATHWAY                      | GOBP_PEROXISOME_PROLIFERATOR_ACTIVATED_RECEPTOR_SIGNALING_PATHWAY                      | GOBP_PEROXISOME_PROLIFERATOR_ACTIVATED_RECEPTOR_SIGNALING_PATHWAY                      | 2   | 0.918505942  | 1.60343982   | 0.0128371 | 0.1949751 | 0.1823831 | 98  |
| GOBP_PROSTANOID_BIOSYNTHETIC_PROCESS                                                   | GOBP_PROSTANOID_BIOSYNTHETIC_PROCESS                                                   | GOBP_PROSTANOID_BIOSYNTHETIC_PROCESS                                                   | 2   | 0.918505942  | 1.60343982   | 0.0128371 | 0.1949751 | 0.1823831 | 98  |
| GOBP_REGULATION_OF_PEROXISOME_PROLIFERATOR_ACTIVATED_RECEPTOR_SIGNALING_PATHWAY        | GOBP_REGULATION_OF_PEROXISOME_PROLIFERATOR_ACTIVATED_RECEPTOR_SIGNALING_PATHWAY        | GOBP_REGULATION_OF_PEROXISOME_PROLIFERATOR_ACTIVATED_RECEPTOR_SIGNALING_PATHWAY        | 2   | 0.918505942  | 1.60343982   | 0.0128371 | 0.1949751 | 0.1823831 | 98  |
| GOCC_MEMBRANE_MICRODOMAIN                                                              | GOCC_MEMBRANE_MICRODOMAIN                                                              | GOCC_MEMBRANE_MICRODOMAIN                                                              | 27  | -0.392619268 | -1.700529468 | 0.0129407 | 0.1956021 | 0.1826969 | 265 |
| GOBP_POSITIVE_REGULATION_OF_INTERLEUKIN_2_PRODUCTION                                   | GOBP_POSITIVE_REGULATION_OF_INTERLEUKIN_2_PRODUCTION                                   | GOBP_POSITIVE_REGULATION_OF_INTERLEUKIN_2_PRODUCTION                                   | 7   | -0.612152717 | -1.676444607 | 0.0129421 | 0.1956021 | 0.1826969 | 167 |
| HP_SUPERNUMERARY_NIPPLE                                                                | HP_SUPERNUMERARY_NIPPLE                                                                | HP_SUPERNUMERARY_NIPPLE                                                                | 7   | -0.612046404 | -1.676153457 | 0.0129421 | 0.1956021 | 0.1826969 | 159 |
| GOBP_POSITIVE_REGULATION_OF_INTRINSIC_APOPTOTIC_SIGNALING_PATHWAY                      | GOBP_POSITIVE_REGULATION_OF_INTRINSIC_APOPTOTIC_SIGNALING_PATHWAY                      | GOBP_POSITIVE_REGULATION_OF_INTRINSIC_APOPTOTIC_SIGNALING_PATHWAY                      | 11  | 0.505888424  | 1.880847542  | 0.0129502 | 0.1956021 | 0.1826969 | 301 |
| GOBP_REGULATION_OF_SECRETION                                                           | GOBP_REGULATION_OF_SECRETION                                                           | GOBP_REGULATION_OF_SECRETION                                                           | 33  | -0.365325684 | -1.708112859 | 0.0129781 | 0.1957541 | 0.1831111 | 165 |
| HP_ABNORMAL_NASOLACRIMAL_SYSTEM_MORPHOLOGY                                             | HP_ABNORMAL_NASOLACRIMAL_SYSTEM_MORPHOLOGY                                             | HP_ABNORMAL_NASOLACRIMAL_SYSTEM_MORPHOLOGY                                             | 11  | -0.541257741 | -1.755579793 | 0.0130304 | 0.1960511 | 0.1833989 | 407 |
| HP_PSYCHOGENIC_NON_EPILEPTIC_SEIZURE                                                   | HP_PSYCHOGENIC_NON_EPILEPTIC_SEIZURE                                                   | HP_PSYCHOGENIC_NON_EPILEPTIC_SEIZURE                                                   | 11  | -0.540908751 | -1.754447774 | 0.0130304 | 0.1960511 | 0.1833989 | 339 |
| GOBP_BIOMINERALIZATION                                                                 | GOBP_BIOMINERALIZATION                                                                 | GOBP_BIOMINERALIZATION                                                                 | 10  | -0.582481101 | -1.838831778 | 0.0130531 | 0.1960781 | 0.1834141 | 315 |
| GOMF_NUCLEOTIDE_RECEPTOR_ACTIVITY                                                      | GOMF_NUCLEOTIDE_RECEPTOR_ACTIVITY                                                      | GOMF_NUCLEOTIDE_RECEPTOR_ACTIVITY                                                      | 3   | -0.799036216 | -1.591597864 | 0.0132571 | 0.1986691 | 0.1860251 | 29  |
| HP_HYPOPLASIA_OF_TEETH                                                                 | HP_HYPOPLASIA_OF_TEETH                                                                 | HP_HYPOPLASIA_OF_TEETH                                                                 | 12  | -0.5193371   | -1.728771774 | 0.0133011 | 0.1992401 | 0.1863721 | 119 |
| GOBP_BONE_REMODELING                                                                   | GOBP_BONE_REMODELING                                                                   | GOBP_BONE_REMODELING                                                                   | 8   | -0.613894294 | -1.761962993 | 0.0133531 | 0.1997541 | 0.1868521 | 265 |
| HP_ABNORMALITY_OF_THE_PULMONARY_VASCULATURE                                            | HP_ABNORMALITY_OF_THE_PULMONARY_VASCULATURE                                            | HP_ABNORMALITY_OF_THE_PULMONARY_VASCULATURE                                            | 14  | -0.494501274 | -1.742732561 | 0.0135101 | 0.2018271 | 0.1867921 | 179 |
| HP_ABNORMAL_INTESTINE_MORPHOLOGY                                                       | HP_ABNORMAL_INTESTINE_MORPHOLOGY                                                       | HP_ABNORMAL_INTESTINE_MORPHOLOGY                                                       | 83  | -0.272764837 | -1.642703988 | 0.0135992 | 0.2025061 | 0.1894271 | 430 |
| GOBP_CHONDROCYTE_PROLIFERATION                                                         | GOBP_CHONDROCYTE_PROLIFERATION                                                         | GOBP_CHONDROCYTE_PROLIFERATION                                                         | 2   | -0.899830221 | -1.529048345 | 0.0136121 | 0.2025061 | 0.1894271 | 121 |
| HP_NOCTURNAL_SEIZURES                                                                  | HP_NOCTURNAL_SEIZURES                                                                  | HP_NOCTURNAL_SEIZURES                                                                  | 2   | -0.896434635 | -1.523278351 | 0.0136121 | 0.2025061 | 0.1894271 | 125 |
| HP_CLEFT_LIP                                                                           | HP_CLEFT_LIP                                                                           | HP_CLEFT_LIP                                                                           | 29  | 0.324746102  | 1.796457751  | 0.0136421 | 0.2026781 | 0.1895891 | 324 |
| GOBP_CIRCULATORY_SYSTEM_DEVELOPMENT                                                    | GOBP_CIRCULATORY_SYSTEM_DEVELOPMENT                                                    | GOBP_CIRCULATORY_SYSTEM_DEVELOPMENT                                                    | 80  | 0.209717177  | 1.657324964  | 0.0137331 | 0.2037481 | 0.1905581 | 75  |
| GOBP_BONE_MINERALIZATION                                                               | GOBP_BONE_MINERALIZATION                                                               | GOBP_BONE_MINERALIZATION                                                               | 8   | -0.612435928 | -1.757772778 | 0.0138251 | 0.2048521 | 0.1916271 | 315 |
| GOBP_CARDIOCYTE_DIFFERENTIATION                                                        | GOBP_CARDIOCYTE_DIFFERENTIATION                                                        | GOBP_CARDIOCYTE_DIFFERENTIATION                                                        | 7   | -0.607666108 | -1.664157556 | 0.0138992 | 0.2055471 | 0.1922721 | 163 |
| GOCC_SOMATOENDRITIC_COMPARTMENT                                                        | GOCC_SOMATOENDRITIC_COMPARTMENT                                                        | GOCC_SOMATOENDRITIC_COMPARTMENT                                                        | 41  | 0.279190755  | 1.74750291   | 0.0139601 | 0.2060701 | 0.1927611 | 90  |
| HP_ABNORMALITY_OF_URINE_HOMEOSTASIS                                                    | HP_ABNORMALITY_OF_URINE_HOMEOSTASIS                                                    | HP_ABNORMALITY_OF_URINE_HOMEOSTASIS                                                    | 49  | -0.320265372 | -1.697034764 | 0.0139691 | 0.2060701 | 0.1927611 | 24  |
| GOBP_VIRAL_PROCESS                                                                     | GOBP_VIRAL_PROCESS                                                                     | GOBP_VIRAL_PROCESS                                                                     | 53  | 0.244175908  | 1.662288666  | 0.0139851 | 0.2060701 | 0.1927611 | 155 |
| GOMF_SH2_DOMAIN_BINDING                                                                | GOMF_SH2_DOMAIN_BINDING                                                                | GOMF_SH2_DOMAIN_BINDING                                                                | 4   | -0.733215964 | -1.641281869 | 0.0140031 | 0.2060701 | 0.1927611 | 172 |
| GOBP_CENTRAL_NERVOUS_SYSTEM_NEURON_DEVELOPMENT                                         | GOBP_CENTRAL_NERVOUS_SYSTEM_NEURON_DEVELOPMENT                                         | GOBP_CENTRAL_NERVOUS_SYSTEM_NEURON_DEVELOPMENT                                         | 7   | 0.590294558  | 1.77633998   | 0.0141061 | 0.2065641 | 0.1932231 | 20  |
| GOBP_NEGATIVE_REGULATION_OF_RESPONSE_TO_ENDOPLASMIC_RETICULUM_STRESS                   | GOBP_NEGATIVE_REGULATION_OF_RESPONSE_TO_ENDOPLASMIC_RETICULUM_STRESS                   | GOBP_NEGATIVE_REGULATION_OF_RESPONSE_TO_ENDOPLASMIC_RETICULUM_STRESS                   | 7   | 0.589502819  | 1.773957443  | 0.0141061 | 0.2065641 | 0.1932231 | 9   |
| HP_IMMUNOLOGIC_HYPERSENSITIVITY                                                        | HP_IMMUNOLOGIC_HYPERSENSITIVITY                                                        | HP_IMMUNOLOGIC_HYPERSENSITIVITY                                                        | 23  | -0.419450289 | -1.757973765 | 0.0141151 | 0.2065641 | 0.1932231 | 370 |
| GOBP_REGULATION_OF_INTRACELLULAR_SIGNAL_TRANSDUCTION                                   | GOBP_REGULATION_OF_INTRACELLULAR_SIGNAL_TRANSDUCTION                                   | GOBP_REGULATION_OF_INTRACELLULAR_SIGNAL_TRANSDUCTION                                   | 166 | 0.164328226  | 1.528719091  | 0.0141221 | 0.2065641 | 0.1932231 | 42  |
| GOBP_POSITIVE_REGULATION_OF_DEVELOPMENTAL_PROCESS                                      | GOBP_POSITIVE_REGULATION_OF_DEVELOPMENTAL_PROCESS                                      | GOBP_POSITIVE_REGULATION_OF_DEVELOPMENTAL_PROCESS                                      | 89  | 0.208061237  | 1.684014506  | 0.0141311 | 0.2065641 | 0.1932231 | 133 |
| HP_FEEDING_DIFFICULTIES                                                                | HP_FEEDING_DIFFICULTIES                                                                | HP_FEEDING_DIFFICULTIES                                                                | 109 | -0.253036748 | -1.613654254 | 0.0142001 | 0.2069791 | 0.1936111 | 242 |
| GOCC_CELL_PROJECTION_MEMBRANE                                                          | GOCC_CELL_PROJECTION_MEMBRANE                                                          | GOCC_CELL_PROJECTION_MEMBRANE                                                          | 21  | -0.415945648 | -1.676685487 | 0.0142121 | 0.2069791 | 0.1936111 | 253 |
| HP_MUSCLE_WEAKNESS                                                                     | HP_MUSCLE_WEAKNESS                                                                     | HP_MUSCLE_WEAKNESS                                                                     | 85  | -0.270498874 | -1.640828934 | 0.0142171 | 0.2069791 | 0.1936111 | 479 |
| GOBP_INTRACELLULAR_RECEPTOR_SIGNALING_PATHWAY                                          | GOBP_INTRACELLULAR_RECEPTOR_SIGNALING_PATHWAY                                          | GOBP_INTRACELLULAR_RECEPTOR_SIGNALING_PATHWAY                                          | 38  | 0.280514053  | 1.743373058  | 0.0142501 | 0.2071901 | 0.1938006 | 110 |
| GOBP_POLYAMINE_METABOLIC_PROCESS                                                       | GOBP_POLYAMINE_METABOLIC_PROCESS                                                       | GOBP_POLYAMINE_METABOLIC_PROCESS                                                       | 2   | 0.913412564  | 1.594548287  | 0.0143141 | 0.2075621 | 0.1941571 | 104 |
| GOBP_NEGATIVE_REGULATION_OF_FIBROBLAST_PROLIFERATION                                   | GOBP_NEGATIVE_REGULATION_OF_FIBROBLAST_PROLIFERATION                                   | GOBP_NEGATIVE_REGULATION_OF_FIBROBLAST_PROLIFERATION                                   | 4   | 0.788639966  | 1.671588468  | 0.0143141 | 0.2075621 | 0.1941571 | 55  |
| GOMF_DEACETYLASE_ACTIVITY                                                              | GOMF_DEACETYLASE_ACTIVITY                                                              | GOMF_DEACETYLASE_ACTIVITY                                                              | 9   | 0.912563667  | 1.593006365  | 0.0144991 | 0.2095871 | 0.1960501 | 105 |
| GOMF_ATPASE_ACTIVATOR_ACTIVITY                                                         | GOMF_ATPASE_ACTIVATOR_ACTIVITY                                                         | GOMF_ATPASE_ACTIVATOR_ACTIVITY                                                         | 4   | 0.787883441  | 1.815844895  | 0.0145121 | 0.2095871 | 0.1960501 | 17  |
| GOMF_MOLECULAR_FUNCTION_ACTIVATOR_ACTIVITY                                             | GOMF_MOLECULAR_FUNCTION_ACTIVATOR_ACTIVITY                                             | GOMF_MOLECULAR_FUNCTION_ACTIVATOR_ACTIVITY                                             | 4   | 0.787883441  | 1.815844895  | 0.0145121 | 0.2095871 | 0.1960501 | 17  |
| HP_AORTIC_ANEURYSM                                                                     | HP_AORTIC_ANEURYSM                                                                     | HP_AORTIC_ANEURYSM                                                                     | 19  | -0.480722811 | -1.747826861 | 0.0147061 | 0.2121171 | 0.1984181 | 211 |
| GOBP_ACTIVATION_OF_PHOSPHOLIPASE_C_ACTIVITY                                            | GOBP_ACTIVATION_OF_PHOSPHOLIPASE_C_ACTIVITY                                            | GOBP_ACTIVATION_OF_PHOSPHOLIPASE_C_ACTIVITY                                            | 2   | -0.89049236  | -1.513118062 | 0.0148601 | 0.2127771 | 0.1990303 | 132 |
| GOBP_GNANULOCYTE_MACROPHAGE_COLONY_STIMULATING_FACTOR_PRODUCTION                       | GOBP_GNANULOCYTE_MACROPHAGE_COLONY_STIMULATING_FACTOR_PRODUCTION                       | GOBP_GNANULOCYTE_MACROPHAGE_COLONY_STIMULATING_FACTOR_PRODUCTION                       | 2   | -0.891341256 | -1.51462336  | 0.0148601 | 0.2127771 | 0.1990303 | 131 |
| GOBP_MONOCYTE_CHEMOTACTIC_PROTEIN_1_PRODUCTION                                         | GOBP_MONOCYTE_CHEMOTACTIC_PROTEIN_1_PRODUCTION                                         | GOBP_MONOCYTE_CHEMOTACTIC_PROTEIN_1_PRODUCTION                                         | 2   | -0.891341256 | -1.51462336  | 0.0148601 | 0.2127771 | 0.1990303 | 131 |
| GOBP_POSITIVE_REGULATION_OF_MONOCYTE_CHEMOTACTIC_PROTEIN_1_PRODUCTION                  | GOBP_POSITIVE_REGULATION_OF_MONOCYTE_CHEMOTACTIC_PROTEIN_1_PRODUCTION                  | GOBP_POSITIVE_REGULATION_OF_MONOCYTE_CHEMOTACTIC_PROTEIN_1_PRODUCTION                  | 2   | -0.891341256 | -1.51462336  | 0.0148601 | 0.2127771 | 0.1990303 | 131 |
| GOBP_REGULATION_OF_PHOSPHOLIPASE_C_ACTIVITY                                            | GOBP_REGULATION_OF_PHOSPHOLIPASE_C_ACTIVITY                                            | GOBP_REGULATION_OF_PHOSPHOLIPASE_C_ACTIVITY                                            | 2   | -0.89049236  | -1.513118062 | 0.0148601 | 0.2127771 | 0.1990303 | 132 |
| HP_INFLAMMATION_OF_THE_LARGE_INTESTINE                                                 | HP_INFLAMMATION_OF_THE_LARGE_INTESTINE                                                 | HP_INFLAMMATION_OF_THE_LARGE_INTESTINE                                                 | 10  | -0.573117342 | -1.809271372 | 0.0148691 | 0.2127771 | 0.1990303 | 370 |
| GOBP_NEGATIVE_REGULATION_OF_DNA_BINDING                                                | GOBP_NEGATIVE_REGULATION_OF_DNA_BINDING                                                | GOBP_NEGATIVE_REGULATION_OF_DNA_BINDING                                                | 5   | 0.710027482  | 1.7979232    | 0.0149061 | 0.2130231 | 0.1992641 | 67  |
| GOMF_TELOMERIC_DNA_BINDING                                                             | GOMF_TELOMERIC_DNA_BINDING                                                             | GOMF_TELOMERIC_DNA_BINDING                                                             | 3   | -0.789528682 | -1.572627558 | 0.0149601 | 0.2135151 | 0.1997251 | 67  |
| GOBP_MUSCLE_CELL_DIFFERENTIATION                                                       | GOBP_MUSCLE_CELL_DIFFERENTIATION                                                       | GOBP_MUSCLE_CELL_DIFFERENTIATION                                                       | 27  | -0.387502575 | -1.678367827 | 0.0150441 | 0.2144341 | 0.2005851 | 266 |
| HP_BROAD_TOE                                                                           | HP_BROAD_TOE                                                                           | HP_BROAD_TOE                                                                           | 11  | -0.536282115 | -1.739441193 | 0.0150741 | 0.2144801 | 0.2006281 | 177 |
| GOBP_REGULATION_OF_OXIDATIVE_STRESS_INDUCED_CELL_DEATH                                 | GOBP_REGULATION_OF_OXIDATIVE_STRESS_INDUCED_CELL_DEATH                                 | GOBP_REGULATION_OF_OXIDATIVE_STRESS_INDUCED_CELL_DEATH                                 | 6   | 0.645183868  | 1.807632653  | 0.0151071 | 0.2144801 | 0.2006281 | 98  |
| GOBP_REGULATION_OF_RESPONSE_TO_OXIDATIVE_STRESS                                        | GOBP_REGULATION_OF_RESPONSE_TO_OXIDATIVE_STRESS                                        | GOBP_REGULATION_OF_RESPONSE_TO_OXIDATIVE_STRESS                                        | 6   | 0.645183868  | 1.807632653  | 0.0151071 | 0.2144801 | 0.2006281 | 98  |
| HP_POOR_SPEECH                                                                         | HP_POOR_SPEECH                                                                         | HP_POOR_SPEECH                                                                         | 32  | -0.36291382  | -1.667041558 | 0.0151446 | 0.2147521 | 0.2008828 | 406 |
| GOBP_REGULATION_OF_PEPTIDYL_THREONINE_PHOSPHORYLATION                                  | GOBP_REGULATION_OF_PEPTIDYL_THREONINE_PHOSPHORYLATION                                  | GOBP_REGULATION_OF_PEPTIDYL_THREONINE_PHOSPHORYLATION                                  | 3   | -0.78795306  | -1.569489145 | 0.0152004 | 0.2152921 | 0.2013871 | 37  |
| GOBP_REGULATION_OF_LYMPHOCYTE_DIFFERENTIATION                                          | GOBP_REGULATION_OF_LYMPHOCYTE_DIFFERENTIATION                                          | GOBP_REGULATION_OF_LYMPHOCYTE_DIFFERENTIATION                                          | 21  | -0.413501948 | -1.666834883 | 0.0152811 | 0.2158201 | 0.2018811 | 276 |
| GOBP_INTRINSIC_APOPTOTIC_SIGNALING_PATHWAY_IN_RESPONSE_TO_ENDOPLASMIC_RETICULUM_STRESS | GOBP_INTRINSIC_APOPTOTIC_SIGNALING_PATHWAY_IN_RESPONSE_TO_ENDOPLASMIC_RETICULUM_STRESS | GOBP_INTRINSIC_APOPTOTIC_SIGNALING_PATHWAY_IN_RESPONSE_TO_ENDOPLASMIC_RETICULUM_STRESS | 11  | 0.497643119  | 1.850192242  | 0.0153441 | 0.2158201 | 0.2018811 | 98  |
| HP_MACROZIA                                                                            | HP_MACROZIA                                                                            | HP_MACROZIA                                                                            | 32  | -0.362433005 | -1.66483294  | 0.0153521 | 0.2158201 | 0.2018811 | 177 |
| GOBP_SPHINGOLIPID_MEDIATED_SIGNALING_PATHWAY                                           | GOBP_SPHINGOLIPID_MEDIATED_SIGNALING_PATHWAY                                           | GOBP_SPHINGOLIPID_MEDIATED_SIGNALING_PATHWAY                                           | 2   | -0.887096774 | -1.507410868 | 0.0153601 | 0.2158201 | 0.2018811 | 136 |
| GOMF_BIOACTIVE_LIPID_RECEPTOR_ACTIVITY                                                 | GOMF_BIOACTIVE_LIPID_RECEPTOR_ACTIVITY                                                 | GOMF_BIOACTIVE_LIPID_RECEPTOR_ACTIVITY                                                 | 2   | -0.887096774 | -1.507410868 | 0.0153601 | 0.2158201 | 0.2018811 | 136 |
| GOMF_SPHINGOSINE_1_PHOSPHATE_RECEPTOR_ACTIVITY                                         | GOMF_SPHINGOSINE_1_PHOSPHATE_RECEPTOR_ACTIVITY                                         | GOMF_SPHINGOSINE_1_PHOSPHATE_RECEPTOR_ACTIVITY                                         | 2   | -0.887096774 | -1.507410868 | 0.0153601 | 0.2158201 | 0.2018811 | 136 |
| HP_NARROW_FOREHEAD                                                                     | HP_NARROW_FOREHEAD                                                                     | HP_NARROW_FOREHEAD                                                                     | 16  | -0.4613923   | -1.701375695 | 0.0154131 | 0.2162851 | 0.2023161 | 164 |
| HP_DELAYED_ABILITY_TO_WALK                                                             | HP_DELAYED_ABILITY_TO_WALK                                                             | HP_DELAYED_ABILITY_TO_WALK                                                             | 28  | -0.3866753   | -1.700070132 | 0.0155011 | 0.2172441 | 0.2032131 | 239 |
| HP_CAFE_AU_LAIT_SPOT                                                                   | HP_CAFE_AU_LAIT_SPOT                                                                   | HP_CAFE_AU_LAIT_SPOT                                                                   | 18  | -0.454066915 | -1.763387342 | 0.0155311 | 0.2173781 | 0.2033361 | 479 |
| HP_DEVIATION_OF_THE_HALLUX                                                             | HP_DEVIATION_OF_THE_HALLUX                                                             | HP_DEVIATION_OF_THE_HALLUX                                                             | 16  | -0.460821124 | -1.69926949  | 0.0156291 | 0.2184651 | 0.2043551 | 206 |
| GOBP_REGULATION_OF_CYSSTEINE_TYPE_ENDOPEPTIDASE_ACTIVITY                               | GOBP_REGULATION_OF_CYSSTEINE_TYPE_ENDOPEPTIDASE_ACTIVITY                               | GOBP_REGULATION_OF_CYSSTEINE_TYPE_ENDOPEPTIDASE_ACTIVITY                               | 34  | 0.209891117  | 1.769837845  | 0.0160521 |           |           |     |

|                                                                                     |                                                                                     |                                                                                     |    |               |              |           |           |           |     |
|-------------------------------------------------------------------------------------|-------------------------------------------------------------------------------------|-------------------------------------------------------------------------------------|----|---------------|--------------|-----------|-----------|-----------|-----|
| GOBP_REGULATION_OF_PROTEIN_IMPORT                                                   | GOBP_REGULATION_OF_PROTEIN_IMPORT                                                   | GOBP_REGULATION_OF_PROTEIN_IMPORT                                                   | 5  | 0.694982511   | 1.7598265    | 0.0188031 | 0.2457831 | 0.2299009 | 20  |
| HP_NEOPLASM_OF_THE_COLON                                                            | HP_NEOPLASM_OF_THE_COLON                                                            | HP_NEOPLASM_OF_THE_COLON                                                            | 21 | 0.357228027   | 1.749563558  | 0.0188551 | 0.2458791 | 0.2299996 | 301 |
| GOBP_NEGATIVE_REGULATION_OF_ALPHA_BETA_T_CELL_ACTIVATION                            | GOBP_NEGATIVE_REGULATION_OF_ALPHA_BETA_T_CELL_ACTIVATION                            | GOBP_NEGATIVE_REGULATION_OF_ALPHA_BETA_T_CELL_ACTIVATION                            | 7  | -0.5900065479 | -1.615794804 | 0.0188791 | 0.2458791 | 0.2299996 | 276 |
| HP_SPINAL_CORD_LESION                                                               | HP_SPINAL_CORD_LESION                                                               | HP_SPINAL_CORD_LESION                                                               | 6  | -0.6506676356 | -1.686069647 | 0.0188791 | 0.2458791 | 0.2299996 | 298 |
| GOBP_REGULATION_OF_T_HELPER_2_CELL_DIFFERENTIATION                                  | GOBP_REGULATION_OF_T_HELPER_2_CELL_DIFFERENTIATION                                  | GOBP_REGULATION_OF_T_HELPER_2_CELL_DIFFERENTIATION                                  | 3  | -0.77740017   | -1.548469307 | 0.0190961 | 0.2479341 | 0.2319211 | 266 |
| GOBP_T_HELPER_2_CELL_DIFFERENTIATION                                                | GOBP_T_HELPER_2_CELL_DIFFERENTIATION                                                | GOBP_T_HELPER_2_CELL_DIFFERENTIATION                                                | 3  | -0.77740017   | -1.548469307 | 0.0190961 | 0.2479341 | 0.2319211 | 266 |
| GOBP_REGULATION_OF_TRANSMEMBRANE_TRANSPORT                                          | GOBP_REGULATION_OF_TRANSMEMBRANE_TRANSPORT                                          | GOBP_REGULATION_OF_TRANSMEMBRANE_TRANSPORT                                          | 34 | -0.358430498  | -1.697632491 | 0.0191051 | 0.2479341 | 0.2319211 | 170 |
| GOBP_CELLULAR_IRON_ION_HOMEOSTASIS                                                  | GOBP_CELLULAR_IRON_ION_HOMEOSTASIS                                                  | GOBP_CELLULAR_IRON_ION_HOMEOSTASIS                                                  | 5  | 0.693691292   | 1.756556891  | 0.0191933 | 0.2487841 | 0.2327176 | 162 |
| GOBP_CHROMOSOME_CONDENSATION                                                        | GOBP_CHROMOSOME_CONDENSATION                                                        | GOBP_CHROMOSOME_CONDENSATION                                                        | 3  | -0.776054594  | -1.545789113 | 0.0193391 | 0.2494101 | 0.2333302 | 82  |
| GOBP_RESPONSE_TO_REACTIVE_OXYGEN_SPECIES                                            | GOBP_RESPONSE_TO_REACTIVE_OXYGEN_SPECIES                                            | GOBP_RESPONSE_TO_REACTIVE_OXYGEN_SPECIES                                            | 21 | 0.355756067   | 1.742354471  | 0.0193481 | 0.2494101 | 0.2333302 | 42  |
| HP_AGENESIS_OF_CEREBELLAR_VERMIS                                                    | HP_AGENESIS_OF_CEREBELLAR_VERMIS                                                    | HP_AGENESIS_OF_CEREBELLAR_VERMIS                                                    | 2  | -0.873514431  | -1.484330893 | 0.0193561 | 0.2494101 | 0.2333302 | 152 |
| HP_HAPPY_DEMEANOR                                                                   | HP_HAPPY_DEMEANOR                                                                   | HP_HAPPY_DEMEANOR                                                                   | 2  | -0.873514431  | -1.484330893 | 0.0193561 | 0.2494101 | 0.2333302 | 152 |
| HP_PELVIC_KIDNEY                                                                    | HP_PELVIC_KIDNEY                                                                    | HP_PELVIC_KIDNEY                                                                    | 2  | -0.873514431  | -1.484330893 | 0.0193561 | 0.2494101 | 0.2333302 | 152 |
| GOBP_RESPONSE_TO_ENDOPLASMIC_RETICULUM_STRESS                                       | GOBP_RESPONSE_TO_ENDOPLASMIC_RETICULUM_STRESS                                       | GOBP_RESPONSE_TO_ENDOPLASMIC_RETICULUM_STRESS                                       | 44 | 0.2636992045  | 1.685916884  | 0.0194241 | 0.2499911 | 0.2338451 | 32  |
| GOBP_REGULATION_OF_MITOCHONDRION_ORGANIZATION                                       | GOBP_REGULATION_OF_MITOCHONDRION_ORGANIZATION                                       | GOBP_REGULATION_OF_MITOCHONDRION_ORGANIZATION                                       | 16 | 0.400468953   | 1.736803362  | 0.0194541 | 0.2500851 | 0.2339333 | 133 |
| GOBP_NEGATIVE_REGULATION_OF_AUTOPHAGY                                               | GOBP_NEGATIVE_REGULATION_OF_AUTOPHAGY                                               | GOBP_NEGATIVE_REGULATION_OF_AUTOPHAGY                                               | 9  | -0.5703115311 | -1.71951574  | 0.0195391 | 0.2506811 | 0.2346681 | 354 |
| GOBP_NEGATIVE_REGULATION_OF_LYMPHOCYTE_ACTIVATION                                   | GOBP_NEGATIVE_REGULATION_OF_LYMPHOCYTE_ACTIVATION                                   | GOBP_NEGATIVE_REGULATION_OF_LYMPHOCYTE_ACTIVATION                                   | 17 | -0.447234135  | -1.700769502 | 0.0195731 | 0.2510191 | 0.2348071 | 618 |
| GOBP_PROTEIN_LOCALIZATION_TO_MITOCHONDRION                                          | GOBP_PROTEIN_LOCALIZATION_TO_MITOCHONDRION                                          | GOBP_PROTEIN_LOCALIZATION_TO_MITOCHONDRION                                          | 14 | 0.436725888   | 1.765359246  | 0.0198261 | 0.2539601 | 0.2375581 | 265 |
| HP_NARROW_MOUTH                                                                     | HP_NARROW_MOUTH                                                                     | HP_NARROW_MOUTH                                                                     | 29 | -0.37344259   | -1.668129218 | 0.0200231 | 0.2560981 | 0.2395581 | 437 |
| GOBP_CELLULAR_RESPONSE_TO_CADMIUM_ION                                               | GOBP_CELLULAR_RESPONSE_TO_CADMIUM_ION                                               | GOBP_CELLULAR_RESPONSE_TO_CADMIUM_ION                                               | 4  | 0.770575345   | 1.775954708  | 0.0200401 | 0.2560981 | 0.2395581 | 13  |
| GOBP_CARTILAGE_DEVELOPMENT                                                          | GOBP_CARTILAGE_DEVELOPMENT                                                          | GOBP_CARTILAGE_DEVELOPMENT                                                          | 10 | -0.562688956  | -1.77635005  | 0.0200911 | 0.2564481 | 0.2398651 | 315 |
| HP_ABNORMAL_ARACHNOID_MATER_MORPHOLOGY                                              | HP_ABNORMAL_ARACHNOID_MATER_MORPHOLOGY                                              | HP_ABNORMAL_ARACHNOID_MATER_MORPHOLOGY                                              | 4  | -0.72038052   | -1.612550115 | 0.0202281 | 0.2578751 | 0.2412202 | 164 |
| GOMF_TRANSCRIPTION_COREPRESSOR_ACTIVITY                                             | GOMF_TRANSCRIPTION_COREPRESSOR_ACTIVITY                                             | GOMF_TRANSCRIPTION_COREPRESSOR_ACTIVITY                                             | 23 | 0.338221423   | 1.695079562  | 0.0203621 | 0.2592941 | 0.2425471 | 107 |
| HP_ABNORMALITY_OF_CRANIAL_SUTURES                                                   | HP_ABNORMALITY_OF_CRANIAL_SUTURES                                                   | HP_ABNORMALITY_OF_CRANIAL_SUTURES                                                   | 37 | -0.338826774  | -1.646068514 | 0.0204921 | 0.2606531 | 0.2436181 | 433 |
| GOBP_DECREASED_ACTIVITY_OF_MITOCHONDRIAL_COMPLEX_I                                  | GOBP_DECREASED_ACTIVITY_OF_MITOCHONDRIAL_COMPLEX_I                                  | GOBP_DECREASED_ACTIVITY_OF_MITOCHONDRIAL_COMPLEX_I                                  | 7  | -0.586518789  | -1.606243398 | 0.0205411 | 0.2609651 | 0.2441111 | 222 |
| GOCCLTORC1_COMPLEX                                                                  | GOCCLTORC1_COMPLEX                                                                  | GOCCLTORC1_COMPLEX                                                                  | 1  | -0.995759118  | -1.321330765 | 0.0206211 | 0.2616791 | 0.2447179 | 7   |
| HP_PAROXYSMAL_INVOLUNTARY_EYE_MOVEMENTS                                             | HP_PAROXYSMAL_INVOLUNTARY_EYE_MOVEMENTS                                             | HP_PAROXYSMAL_INVOLUNTARY_EYE_MOVEMENTS                                             | 6  | -0.645824675  | -1.673497694 | 0.0207781 | 0.2633671 | 0.2463571 | 222 |
| GOBP_REGULATION_OF_DEOXYRIBONUCLEASE_ACTIVITY                                       | GOBP_REGULATION_OF_DEOXYRIBONUCLEASE_ACTIVITY                                       | GOBP_REGULATION_OF_DEOXYRIBONUCLEASE_ACTIVITY                                       | 4  | 0.767857143   | 1.769690034  | 0.0208341 | 0.2635071 | 0.2464881 | 277 |
| HP_HYPERACTIVITY                                                                    | HP_HYPERACTIVITY                                                                    | HP_HYPERACTIVITY                                                                    | 63 | -0.2893177    | -1.629953981 | 0.0208381 | 0.2635071 | 0.2464881 | 781 |
| GOBP_CELL_ADHESION_MOLECULE_BINDING                                                 | GOMF_CELL_ADHESION_MOLECULE_BINDING                                                 | GOMF_CELL_ADHESION_MOLECULE_BINDING                                                 | 61 | 0.223364635   | 1.62389898   | 0.0210151 | 0.2654381 | 0.2489511 | 37  |
| HP_LONG_FINGERS                                                                     | HP_LONG_FINGERS                                                                     | HP_LONG_FINGERS                                                                     | 28 | -0.376690026  | -1.65616527  | 0.0211191 | 0.2664471 | 0.2492391 | 442 |
| HP_MACRODONTIA                                                                      | HP_MACRODONTIA                                                                      | HP_MACRODONTIA                                                                      | 9  | -0.566644215  | -1.708447289 | 0.0211571 | 0.2666161 | 0.2493971 | 177 |
| HP_ERYTHROCYTE_INCLUSION_BODIES                                                     | HP_ERYTHROCYTE_INCLUSION_BODIES                                                     | HP_ERYTHROCYTE_INCLUSION_BODIES                                                     | 2  | 0.899630221   | 1.570837532  | 0.0213461 | 0.2686791 | 0.2513261 | 120 |
| GOBP_POSITIVE_REGULATION_OF_CELL_GROWTH                                             | GOBP_POSITIVE_REGULATION_OF_CELL_GROWTH                                             | GOBP_POSITIVE_REGULATION_OF_CELL_GROWTH                                             | 14 | -0.47577581   | -1.676739857 | 0.0216391 | 0.2717261 | 0.2541761 | 354 |
| GOBP_POSITIVE_REGULATION_OF_DEVELOPMENTAL_GROWTH                                    | GOBP_POSITIVE_REGULATION_OF_DEVELOPMENTAL_GROWTH                                    | GOBP_POSITIVE_REGULATION_OF_DEVELOPMENTAL_GROWTH                                    | 14 | -0.475858734  | -1.677027186 | 0.0216391 | 0.2717261 | 0.2541761 | 354 |
| GOBP_REGULATION_OF_BONE_RESORPTION                                                  | GOBP_REGULATION_OF_BONE_RESORPTION                                                  | GOBP_REGULATION_OF_BONE_RESORPTION                                                  | 4  | -0.717573029  | -1.606266529 | 0.0216631 | 0.2717261 | 0.2541761 | 136 |
| HP_MYELODYSPLASIA                                                                   | HP_MYELODYSPLASIA                                                                   | HP_MYELODYSPLASIA                                                                   | 23 | 0.334480895   | 1.676332988  | 0.0217101 | 0.2720071 | 0.2544361 | 274 |
| GOBP_POSITIVE_REGULATION_OF_EPITHELIAL_CELL_PROLIFERATION                           | GOBP_POSITIVE_REGULATION_OF_EPITHELIAL_CELL_PROLIFERATION                           | GOBP_POSITIVE_REGULATION_OF_EPITHELIAL_CELL_PROLIFERATION                           | 8  | 0.525452879   | 1.682615487  | 0.0220961 | 0.2765261 | 0.2589681 | 98  |
| GOMF_TRANSCRIPTION_FACTOR_BINDING                                                   | GOMF_TRANSCRIPTION_FACTOR_BINDING                                                   | GOMF_TRANSCRIPTION_FACTOR_BINDING                                                   | 87 | 0.199094109   | 1.621917747  | 0.0224051 | 0.2799691 | 0.2618861 | 39  |
| GOBP_INTRINSIC_APOPTOTIC_SIGNALING_PATHWAY_IN_RESPONSE_TO_OXIDATIVE_STRESS          | GOBP_INTRINSIC_APOPTOTIC_SIGNALING_PATHWAY_IN_RESPONSE_TO_OXIDATIVE_STRESS          | GOBP_INTRINSIC_APOPTOTIC_SIGNALING_PATHWAY_IN_RESPONSE_TO_OXIDATIVE_STRESS          | 8  | 0.523597299   | 1.676673524  | 0.0225021 | 0.2799691 | 0.2618861 | 98  |
| HP_EPILEPTIC_ENCEPHALOPATHY                                                         | HP_EPILEPTIC_ENCEPHALOPATHY                                                         | HP_EPILEPTIC_ENCEPHALOPATHY                                                         | 9  | -0.56336521   | -1.698561002 | 0.0225451 | 0.2799691 | 0.2618861 | 113 |
| GOBP_NEGATIVE_REGULATION_OF_DNA_RECOMBINATION                                       | GOBP_NEGATIVE_REGULATION_OF_DNA_RECOMBINATION                                       | GOBP_NEGATIVE_REGULATION_OF_DNA_RECOMBINATION                                       | 2  | -0.86417657   | -1.46846341  | 0.0226031 | 0.2799691 | 0.2618861 | 163 |
| GOBP_REGULATION_OF_GERMINAL_CENTER_FORMATION                                        | GOBP_REGULATION_OF_GERMINAL_CENTER_FORMATION                                        | GOBP_REGULATION_OF_GERMINAL_CENTER_FORMATION                                        | 2  | -0.86417657   | -1.46846341  | 0.0226031 | 0.2799691 | 0.2618861 | 163 |
| HP_ABNORMAL_MONOCYTE_MORPHOLOGY                                                     | HP_ABNORMAL_MONOCYTE_MORPHOLOGY                                                     | HP_ABNORMAL_MONOCYTE_MORPHOLOGY                                                     | 2  | -0.865025467  | -1.469905909 | 0.0226031 | 0.2799691 | 0.2618861 | 162 |
| HP_CRANIOFACIAL_HYPEROSTOSIS                                                        | HP_CRANIOFACIAL_HYPEROSTOSIS                                                        | HP_CRANIOFACIAL_HYPEROSTOSIS                                                        | 2  | -0.865025467  | -1.469905909 | 0.0226031 | 0.2799691 | 0.2618861 | 162 |
| HP_MONOCYTOSIS                                                                      | HP_MONOCYTOSIS                                                                      | HP_MONOCYTOSIS                                                                      | 2  | -0.865025467  | -1.469905909 | 0.0226031 | 0.2799691 | 0.2618861 | 162 |
| HP_RECURRENT_EAR_INFECTIONS                                                         | HP_RECURRENT_EAR_INFECTIONS                                                         | HP_RECURRENT_EAR_INFECTIONS                                                         | 2  | -0.865025467  | -1.469905909 | 0.0226031 | 0.2799691 | 0.2618861 | 162 |
| GOBP_REGULATION_OF_INTRINSIC_APOPTOTIC_SIGNALING_PATHWAY_BY_P53_CLASS               | GOBP_REGULATION_OF_INTRINSIC_APOPTOTIC_SIGNALING_PATHWAY_BY_P53_CLASS               | GOBP_REGULATION_OF_INTRINSIC_APOPTOTIC_SIGNALING_PATHWAY_BY_P53_CLASS               | 6  | 0.621225053   | 1.740493714  | 0.0227221 | 0.2809861 | 0.2628381 | 154 |
| GOBP_MYELOID_LEUKOCYTE_DIFFERENTIATION                                              | GOBP_MYELOID_LEUKOCYTE_DIFFERENTIATION                                              | GOBP_MYELOID_LEUKOCYTE_DIFFERENTIATION                                              | 24 | 0.334500753   | 1.744249959  | 0.0227371 | 0.2809861 | 0.2628381 | 98  |
| HP_ABNORMALITY_OF_THE_THORACIC_CAVITY                                               | HP_ABNORMALITY_OF_THE_THORACIC_CAVITY                                               | HP_ABNORMALITY_OF_THE_THORACIC_CAVITY                                               | 9  | -0.563090613  | -1.697702934 | 0.0227761 | 0.2811491 | 0.2629911 | 451 |
| GOBP_POSITIVE_REGULATION_OF_INTERLEUKIN_8_PRODUCTION                                | GOBP_POSITIVE_REGULATION_OF_INTERLEUKIN_8_PRODUCTION                                | GOBP_POSITIVE_REGULATION_OF_INTERLEUKIN_8_PRODUCTION                                | 5  | 0.680529541   | 1.72323886   | 0.0229111 | 0.2824931 | 0.2642491 | 7   |
| GOBP_POSITIVE_REGULATION_OF_LYMPHOCYTE_MIGRATION                                    | GOBP_POSITIVE_REGULATION_OF_LYMPHOCYTE_MIGRATION                                    | GOBP_POSITIVE_REGULATION_OF_LYMPHOCYTE_MIGRATION                                    | 4  | -0.712110879  | -1.594038772 | 0.0230981 | 0.2827141 | 0.2644551 | 41  |
| GOBP_POSITIVE_REGULATION_OF_T_CELL_MIGRATION                                        | GOBP_POSITIVE_REGULATION_OF_T_CELL_MIGRATION                                        | GOBP_POSITIVE_REGULATION_OF_T_CELL_MIGRATION                                        | 4  | -0.712110879  | -1.594038772 | 0.0230981 | 0.2827141 | 0.2644551 | 41  |
| GOBP_ADRENAL_GLAND_DEVELOPMENT                                                      | GOBP_ADRENAL_GLAND_DEVELOPMENT                                                      | GOBP_ADRENAL_GLAND_DEVELOPMENT                                                      | 2  | 0.89049236    | 1.554536387  | 0.0232021 | 0.2827141 | 0.2644551 | 131 |
| GOBP_C21_STEROID_HORMONE_BIOSYNTHETIC_PROCESS                                       | GOBP_C21_STEROID_HORMONE_BIOSYNTHETIC_PROCESS                                       | GOBP_C21_STEROID_HORMONE_BIOSYNTHETIC_PROCESS                                       | 2  | 0.89049236    | 1.554536387  | 0.0232021 | 0.2827141 | 0.2644551 | 131 |
| GOBP_C21_STEROID_HORMONE_METABOLIC_PROCESS                                          | GOBP_C21_STEROID_HORMONE_METABOLIC_PROCESS                                          | GOBP_C21_STEROID_HORMONE_METABOLIC_PROCESS                                          | 2  | 0.89049236    | 1.554536387  | 0.0232021 | 0.2827141 | 0.2644551 | 131 |
| GOBP_CELLULAR_HORMONE_METABOLIC_PROCESS                                             | GOBP_CELLULAR_HORMONE_METABOLIC_PROCESS                                             | GOBP_CELLULAR_HORMONE_METABOLIC_PROCESS                                             | 2  | 0.89049236    | 1.554536387  | 0.0232021 | 0.2827141 | 0.2644551 | 131 |
| GOBP_GLIAL_CELL_PROLIFERATION                                                       | GOBP_GLIAL_CELL_PROLIFERATION                                                       | GOBP_GLIAL_CELL_PROLIFERATION                                                       | 2  | 0.89049236    | 1.554536387  | 0.0232021 | 0.2827141 | 0.2644551 | 131 |
| GOBP_POSITIVE_REGULATION_OF_GLIAL_CELL_PROLIFERATION                                | GOBP_POSITIVE_REGULATION_OF_GLIAL_CELL_PROLIFERATION                                | GOBP_POSITIVE_REGULATION_OF_GLIAL_CELL_PROLIFERATION                                | 2  | 0.89049236    | 1.554536387  | 0.0232021 | 0.2827141 | 0.2644551 | 131 |
| GOBP_REGULATION_OF_GLIAL_CELL_PROLIFERATION                                         | GOBP_REGULATION_OF_GLIAL_CELL_PROLIFERATION                                         | GOBP_REGULATION_OF_GLIAL_CELL_PROLIFERATION                                         | 2  | 0.89049236    | 1.554536387  | 0.0232021 | 0.2827141 | 0.2644551 | 131 |
| GOBP_STEROID_HORMONE_BIOSYNTHETIC_PROCESS                                           | GOBP_STEROID_HORMONE_BIOSYNTHETIC_PROCESS                                           | GOBP_STEROID_HORMONE_BIOSYNTHETIC_PROCESS                                           | 2  | 0.89049236    | 1.554536387  | 0.0232021 | 0.2827141 | 0.2644551 | 131 |
| GOBP_ANTIMICROBIAL_HUMORAL_IMMUNE_RESPONSE_MEDIATED_BY_ANTIMICROBIAL_FACTOR         | GOBP_ANTIMICROBIAL_HUMORAL_IMMUNE_RESPONSE_MEDIATED_BY_ANTIMICROBIAL_FACTOR         | GOBP_ANTIMICROBIAL_HUMORAL_IMMUNE_RESPONSE_MEDIATED_BY_ANTIMICROBIAL_FACTOR         | 4  | 0.761904782   | 1.755971506  | 0.0232151 | 0.2827141 | 0.2644551 | 284 |
| GOMF_RIBOSOME_BINDING                                                               | GOMF_RIBOSOME_BINDING                                                               | GOMF_RIBOSOME_BINDING                                                               | 10 | 0.495726496   | 1.741546569  | 0.0233351 | 0.2837541 | 0.2654281 | 60  |
| HP_METOPIC_SYNOSTOSIS                                                               | HP_METOPIC_SYNOSTOSIS                                                               | HP_METOPIC_SYNOSTOSIS                                                               | 2  | -0.863327674  | -1.467020912 | 0.0233521 | 0.2837541 | 0.2654281 | 164 |
| GOBP_THIOESTERASE_BINDING                                                           | GOBP_THIOESTERASE_BINDING                                                           | GOBP_THIOESTERASE_BINDING                                                           | 2  | 0.887945671   | 1.550090621  | 0.0235731 | 0.2850951 | 0.2666821 | 134 |
| GOBP_NEURON_APOPTOTIC_PROCESS                                                       | GOBP_NEURON_APOPTOTIC_PROCESS                                                       | GOBP_NEURON_APOPTOTIC_PROCESS                                                       | 19 | 0.356696471   | 1.676160287  | 0.0235921 | 0.2850951 | 0.2666821 | 42  |
| GOBP_CELLULAR_RESPONSE_TO_EPINEPHRINE_STIMULUS                                      | GOBP_CELLULAR_RESPONSE_TO_EPINEPHRINE_STIMULUS                                      | GOBP_CELLULAR_RESPONSE_TO_EPINEPHRINE_STIMULUS                                      | 1  | -0.994910941  | -1.320205271 | 0.0238561 | 0.2850951 | 0.2666821 | 8   |
| GOBP_NEGATIVE_REGULATION_OF_ADENYLATE_CYCLASE_ACTIVATING_ADRENERGIC_FACTOR          | GOBP_NEGATIVE_REGULATION_OF_ADENYLATE_CYCLASE_ACTIVATING_ADRENERGIC_FACTOR          | GOBP_NEGATIVE_REGULATION_OF_ADENYLATE_CYCLASE_ACTIVATING_ADRENERGIC_FACTOR          | 1  | -0.994910941  | -1.320205271 | 0.0238561 | 0.2850951 | 0.2666821 | 8   |
| GOBP_NEGATIVE_REGULATION_OF_ADENYLATE_CYCLASE_ACTIVATING_G_PROTEIN_COUPLED_RECEPTOR | GOBP_NEGATIVE_REGULATION_OF_ADENYLATE_CYCLASE_ACTIVATING_G_PROTEIN_COUPLED_RECEPTOR | GOBP_NEGATIVE_REGULATION_OF_ADENYLATE_CYCLASE_ACTIVATING_G_PROTEIN_COUPLED_RECEPTOR | 1  | -0.994910941  | -1.320205271 | 0.0238561 | 0.2850951 | 0.2666821 | 8   |
| GOBP_NEGATIVE_REGULATION_OF_RELAXATION_OF_MUSCLE                                    | GOBP_NEGATIVE_REGULATION_OF_RELAXATION_OF_MUSCLE                                    | GOBP_NEGATIVE_REGULATION_OF_RELAXATION_OF_MUSCLE                                    | 1  | -0.994910941  | -1.320205271 | 0.0238561 | 0.2850951 | 0.2666821 | 8   |
| GOBP_PLASMA_MEMBRANE_FUSION                                                         | GOBP_PLASMA_MEMBRANE_FUSION                                                         | GOBP_PLASMA_MEMBRANE_FUSION                                                         | 1  | -0.994062765  | -1.319079776 | 0.0238561 | 0.2850951 | 0.2666821 | 9   |
| GOBP_REGULATION_OF_ADENYLATE_CYCLASE_ACTIVATING_G_PROTEIN_COUPLED_RECEPTOR          | GOBP_REGULATION_OF_ADENYLATE_CYCLASE_ACTIVATING_G_PROTEIN_COUPLED_RECEPTOR          | GOBP_REGULATION_OF_ADENYLATE_CYCLASE_ACTIVATING_G_PROTEIN_COUPLED_RECEPTOR          | 1  | -0.994910941  | -1.320205271 | 0.0238561 | 0.2850951 | 0.2666821 | 8   |
| GOBP_RESPONSE_TO_EPINEPHRINE                                                        | GOBP_RESPONSE_TO_EPINEPHRINE                                                        | GOBP_RESPONSE_TO_EPINEPHRINE                                                        | 1  | -0.994910941  | -1.320205271 | 0.0238561 | 0.2850951 | 0.2666821 | 8   |
| GOCCLDENDRITIC_SHAFT                                                                | GOCCLDENDRITIC_SHAFT                                                                | GOCCLDENDRITIC_SHAFT                                                                | 1  | -0.994062765  | -1.319079776 | 0.0238561 | 0.2850951 | 0.2666821 | 9   |
| GOCCLEXCITATORY_SYNAPSE                                                             | GOCCLEXCITATORY_SYNAPSE                                                             | GOCCLEXCITATORY_SYNAPSE                                                             | 1  | -0.994910941  | -1.320205271 | 0.0238561 | 0.2850951 | 0.2666821 | 8   |
| GOCCLGAMMA_TUBULIN_COMPLEX                                                          | GOCCLGAMMA_TUBULIN_COMPLEX                                                          | GOCCLGAMMA_TUBULIN_COMPLEX                                                          | 1  | -0.994910941  | -1.320205271 | 0.0238561 | 0.2850951 | 0.2666821 | 8   |
| GOMF_CAMP_BINDING                                                                   | GOMF_CAMP_BINDING                                                                   | GOMF_CAMP_BINDING                                                                   | 1  | -0.994910941  | -1.320205271 | 0.0238561 | 0.2850951 | 0.2666821 | 8   |
| GOMF_CYCLIC_NUCLEOTIDE_BINDING                                                      | GOMF_CYCLIC_NUCLEOTIDE_BINDING                                                      | GOMF_CYCLIC_NUCLEOTIDE_BINDING                                                      | 1  | -0.994910941  | -1.320205271 | 0.0238561 | 0.2850951 | 0.2666821 | 8   |
| GOMF_GAMMA_TUBULIN_BINDING                                                          | GOMF_GAMMA_TUBULIN_BINDING                                                          | GOMF_GAMMA_TUBULIN_BINDING                                                          | 1  | -0.994910941  | -1.320205271 | 0.0238561 | 0.2850951 | 0.2666821 | 8   |
| GOBP_REGULATION_OF_NUCLEASE_ACTIVITY                                                | GOBP_REGULATION_OF_NUCLEASE_ACTIVITY                                                | GOBP_REGULATION_OF_NUCLEASE_ACTIVITY                                                | 6  | 0.619831271   | 1.736601456  | 0.0239291 | 0.2856541 | 0.2672041 | 277 |
| GOBP_RESPONSE_TO_STARVATION                                                         | GOBP_RESPONSE_TO_STARVATION                                                         | GOBP_RESPONSE_TO_STARVATION                                                         | 24 | 0.331577289   | 1.729005594  | 0.0240071 | 0.2862731 | 0.2677841 | 98  |
| GOBP_RIBOSOMAL_LARGE_SUBUNIT_BIOGENESIS                                             | GOBP_RIBOSOMAL_LARGE_SUBUNIT_BIOGENESIS                                             | GOBP_RIBOSOMAL_LARGE_SUBUNIT_BIOGENESIS                                             | 15 | 0.427667544   | 1.804832071  | 0.0240771 | 0.2864821 | 0.2679791 | 313 |
| GOCCLPIGMENT_GRANULE                                                                | GOCCLPIGMENT_GRANULE                                                                | GOCCLPIGMENT_GRANULE                                                                | 15 | 0.428445933   | 1.808117006  | 0.0240771 | 0.2864821 | 0.2679791 | 314 |
| GOBP_REGULATION_OF_ENDOPLASMIC_RETICULUM_STRESS_INDUCED_INTRINSIC_APOPTOTIC_PATHWAY | GOBP_REGULATION_OF_ENDOPLASMIC_RETICULUM_STRESS_INDUCED_INTRINSIC_APOPTOTIC_PATHWAY | GOBP_REGULATION_OF_ENDOPLASMIC_RETICULUM_STRESS_INDUCED_INTRINSIC_APOPTOTIC_PATHWAY | 5  | 0.519053461   | 1.662123156  | 0.0241231 | 0.2867171 | 0.2681961 | 98  |
| HP_ARNOLD_CHIARI_MALFORMATION                                                       | HP_ARNOLD_CHIARI_MALFORMATION                                                       | HP_ARNOLD_CHIARI_MALFORMATION                                                       | 11 | -0.517137442  | -1.677345083 | 0.0243741 | 0.2886681 | 0.2702111 | 190 |
| GOBP_REGULATION_OF_ALPHA_BETA_T_CELL_DIFFERENTIATION                                | GOBP_REGULATION_OF_ALPHA_BETA_T_CELL_DIFFERENTIATION                                | GOBP_REGULATION_OF_ALPHA_BETA_T_CELL_DIFFERENTIATION                                | 10 | -0.548816246  | -1.732555359 | 0.0244111 | 0.2886681 | 0.2702111 | 276 |
| GOBP_CELLULAR_RESPONSE_TO_EXTRACELLULAR_STIMULUS                                    | GOBP_CELLULAR_RESPONSE_TO_EXTRACELLULAR_STIMULUS                                    | GOBP_CELLULAR                                                                       |    |               |              |           |           |           |     |

|                                                                                     |                                                                                     |                                                                                     |     |              |              |           |           |           |     |
|-------------------------------------------------------------------------------------|-------------------------------------------------------------------------------------|-------------------------------------------------------------------------------------|-----|--------------|--------------|-----------|-----------|-----------|-----|
| GOBP_REGULATION_OF_ERYTHROCYTE_DIFFERENTIATION                                      | GOBP_REGULATION_OF_ERYTHROCYTE_DIFFERENTIATION                                      | GOBP_REGULATION_OF_ERYTHROCYTE_DIFFERENTIATION                                      | 10  | 0.486045893  | 1.707537453  | 0.0281333 | 0.3150868 | 0.2947361 | 57  |
| HP_COLITIS                                                                          | HP_COLITIS                                                                          | HP_COLITIS                                                                          | 8   | -0.579390789 | -1.66293308  | 0.0282640 | 0.3162281 | 0.2956041 | 331 |
| GOBP_RIBOSOME_BIOGENESIS                                                            | GOBP_RIBOSOME_BIOGENESIS                                                            | GOBP_RIBOSOME_BIOGENESIS                                                            | 49  | 0.240644301  | 1.603651935  | 0.0284781 | 0.3182381 | 0.2977400 | 287 |
| GOBP_CYTOKINE_PRODUCTION                                                            | GOBP_CYTOKINE_PRODUCTION                                                            | GOBP_CYTOKINE_PRODUCTION                                                            | 86  | 0.191397917  | 1.563776108  | 0.0287559 | 0.3211071 | 0.3003568 | 28  |
| GOCC_DENDRITIC_TREE                                                                 | GOCC_DENDRITIC_TREE                                                                 | GOCC_DENDRITIC_TREE                                                                 | 30  | 0.305318235  | 1.727781928  | 0.0288951 | 0.3220761 | 0.3012741 | 20  |
| GOBP_REGULATION_OF_CELLULAR_MACROMOLECULE_BIOSYNTHETIC_PROCESS                      | GOBP_REGULATION_OF_CELLULAR_MACROMOLECULE_BIOSYNTHETIC_PROCESS                      | GOBP_REGULATION_OF_CELLULAR_MACROMOLECULE_BIOSYNTHETIC_PROCESS                      | 6   | 0.19371884   | 1.57778567   | 0.0289051 | 0.3220761 | 0.3012741 | 57  |
| GOBP_REGULATION_OF_NEURON_PROJECTION_ARBORIZATION                                   | GOBP_REGULATION_OF_NEURON_PROJECTION_ARBORIZATION                                   | GOBP_REGULATION_OF_NEURON_PROJECTION_ARBORIZATION                                   | 1   | -0.991518236 | -1.315703292 | 0.0289851 | 0.3226452 | 0.3018041 | 12  |
| HP_ABNORMAL_LARYNX_MORPHOLOGY                                                       | HP_ABNORMAL_LARYNX_MORPHOLOGY                                                       | HP_ABNORMAL_LARYNX_MORPHOLOGY                                                       | 18  | -0.43291978  | -1.681271116 | 0.0290992 | 0.3234971 | 0.3026041 | 430 |
| GOBP_REGULATION_OF_PROTEASOMAL_UBIQUITIN_DEPENDENT_PROTEIN_CATABOLIC                | GOBP_REGULATION_OF_PROTEASOMAL_UBIQUITIN_DEPENDENT_PROTEIN_CATABOLIC                | GOBP_REGULATION_OF_PROTEASOMAL_UBIQUITIN_DEPENDENT_PROTEIN_CATABOLIC                | 19  | 0.345321641  | 1.622708572  | 0.0291601 | 0.3239271 | 0.3030061 | 20  |
| HP_TAPERED_FINGER                                                                   | HP_TAPERED_FINGER                                                                   | HP_TAPERED_FINGER                                                                   | 18  | -0.432663912 | -1.680277439 | 0.0295177 | 0.3275501 | 0.3063951 | 433 |
| GOBP_CELLULAR_RESPONSE_TO_ENDOGENOUS_STIMULUS                                       | GOBP_CELLULAR_RESPONSE_TO_ENDOGENOUS_STIMULUS                                       | GOBP_CELLULAR_RESPONSE_TO_ENDOGENOUS_STIMULUS                                       | 110 | 0.18203391   | 1.542673553  | 0.0295554 | 0.3276421 | 0.3064811 | 111 |
| GOBP_POSITIVE_REGULATION_OF_HYDROLASE_ACTIVITY                                      | GOBP_POSITIVE_REGULATION_OF_HYDROLASE_ACTIVITY                                      | GOBP_POSITIVE_REGULATION_OF_HYDROLASE_ACTIVITY                                      | 60  | 0.214959546  | 1.53996891   | 0.0302081 | 0.3345371 | 0.3129311 | 46  |
| HP_ECTRODACTYLY                                                                     | HP_ECTRODACTYLY                                                                     | HP_ECTRODACTYLY                                                                     | 2   | 0.870416135  | 1.519489234  | 0.0302551 | 0.3347191 | 0.3131011 | 3   |
| GOBF_CATION_CHANNEL_ACTIVITY                                                        | GOBF_CATION_CHANNEL_ACTIVITY                                                        | GOBF_CATION_CHANNEL_ACTIVITY                                                        | 10  | -0.53102381  | -1.676386504 | 0.0303431 | 0.3350461 | 0.3134071 | 91  |
| GOBP_REGULATION_OF_SPROUTING_ANGIOGENESIS                                           | GOBP_REGULATION_OF_SPROUTING_ANGIOGENESIS                                           | GOBP_REGULATION_OF_SPROUTING_ANGIOGENESIS                                           | 3   | 0.804057078  | 1.646419834  | 0.0303461 | 0.3350461 | 0.3134071 | 16  |
| GOBP_RRNA_METABOLIC_PROCESS                                                         | GOBP_RRNA_METABOLIC_PROCESS                                                         | GOBP_RRNA_METABOLIC_PROCESS                                                         | 39  | 0.258481854  | 1.612084177  | 0.0308851 | 0.3406641 | 0.3186431 | 274 |
| HP_ABNORMALITY_OF_THE ABDOMINAL_ORGANS                                              | HP_ABNORMALITY_OF_THE ABDOMINAL_ORGANS                                              | HP_ABNORMALITY_OF_THE ABDOMINAL_ORGANS                                              | 115 | -0.246292369 | -1.587817613 | 0.0309891 | 0.3414471 | 0.3193941 | 607 |
| GOBP_NUCLEOSIDE_PHOSPHATE_CATABOLIC_PROCESS                                         | GOBP_NUCLEOSIDE_PHOSPHATE_CATABOLIC_PROCESS                                         | GOBP_NUCLEOSIDE_PHOSPHATE_CATABOLIC_PROCESS                                         | 4   | -0.69085333  | -1.546454388 | 0.0310311 | 0.3415671 | 0.3195061 | 183 |
| GOBP_ALPHA_BETA_T_CELL_DIFFERENTIATION                                              | GOBP_ALPHA_BETA_T_CELL_DIFFERENTIATION                                              | GOBP_ALPHA_BETA_T_CELL_DIFFERENTIATION                                              | 15  | -0.470571202 | -1.684731916 | 0.0310831 | 0.3417911 | 0.3197161 | 276 |
| GOBP_CELLULAR_RESPONSE_TO_VASCULAR_ENDOTHELIAL_GROWTH_FACTOR_STIMULI                | GOBP_CELLULAR_RESPONSE_TO_VASCULAR_ENDOTHELIAL_GROWTH_FACTOR_STIMULI                | GOBP_CELLULAR_RESPONSE_TO_VASCULAR_ENDOTHELIAL_GROWTH_FACTOR_STIMULI                | 3   | 0.803282646  | 1.644834076  | 0.0311191 | 0.3418471 | 0.3197681 | 27  |
| GOBP_T_CELL_MIGRATION                                                               | GOBP_T_CELL_MIGRATION                                                               | GOBP_T_CELL_MIGRATION                                                               | 7   | -0.568315495 | -1.556391763 | 0.0312821 | 0.3430681 | 0.3209101 | 136 |
| GOBP_RESPONSE_TO_CYTOKINE                                                           | GOBP_RESPONSE_TO_CYTOKINE                                                           | GOBP_RESPONSE_TO_CYTOKINE                                                           | 96  | 0.187353513  | 1.563260922  | 0.0313101 | 0.3432471 | 0.3210781 | 58  |
| GOBP_REGULATION_OF_ATP_DEPENDENT_ACTIVITY                                           | GOBP_REGULATION_OF_ATP_DEPENDENT_ACTIVITY                                           | GOBP_REGULATION_OF_ATP_DEPENDENT_ACTIVITY                                           | 8   | 0.504690767  | 1.616130656  | 0.0314211 | 0.3441191 | 0.3219381 | 125 |
| GOBF_RIBONUCLEOTIDE_BINDING                                                         | GOBF_RIBONUCLEOTIDE_BINDING                                                         | GOBF_RIBONUCLEOTIDE_BINDING                                                         | 143 | 0.159593484  | 1.422841451  | 0.0314921 | 0.3445461 | 0.3222931 | 58  |
| GOBP_CARDIAC_MUSCLE_CELL_DIFFERENTIATION                                            | GOBP_CARDIAC_MUSCLE_CELL_DIFFERENTIATION                                            | GOBP_CARDIAC_MUSCLE_CELL_DIFFERENTIATION                                            | 5   | -0.675503194 | -1.683383963 | 0.0317661 | 0.3465111 | 0.3241321 | 144 |
| GOBP_REGULATION_OF_MAST_CELL_ACTIVATION_INVOLVED_IN_IMMUNE_RESPONSE                 | GOBP_REGULATION_OF_MAST_CELL_ACTIVATION_INVOLVED_IN_IMMUNE_RESPONSE                 | GOBP_REGULATION_OF_MAST_CELL_ACTIVATION_INVOLVED_IN_IMMUNE_RESPONSE                 | 5   | -0.673384683 | -1.626716304 | 0.0317661 | 0.3465111 | 0.3241321 | 266 |
| GOBP_VIRAL_LIFE_CYCLE                                                               | GOBP_VIRAL_LIFE_CYCLE                                                               | GOBP_VIRAL_LIFE_CYCLE                                                               | 35  | 0.268868522  | 1.611581884  | 0.0317771 | 0.3465111 | 0.3241321 | 20  |
| GOBP_ESTABLISHMENT_OF_PROTEIN_LOCALIZATION_TO_ORGANELLE                             | GOBP_ESTABLISHMENT_OF_PROTEIN_LOCALIZATION_TO_ORGANELLE                             | GOBP_ESTABLISHMENT_OF_PROTEIN_LOCALIZATION_TO_ORGANELLE                             | 48  | 0.227164686  | 1.49743586   | 0.0317991 | 0.3465111 | 0.3241321 | 96  |
| GOBP_POSITIVE_REGULATION_OF_CYTOKINE_PRODUCTION                                     | GOBP_POSITIVE_REGULATION_OF_CYTOKINE_PRODUCTION                                     | GOBP_POSITIVE_REGULATION_OF_CYTOKINE_PRODUCTION                                     | 53  | 0.22407161   | 1.525423616  | 0.0318781 | 0.3468381 | 0.3244361 | 48  |
| GOBP_HYPOTHALAMUS_DEVELOPMENT                                                       | GOBP_HYPOTHALAMUS_DEVELOPMENT                                                       | GOBP_HYPOTHALAMUS_DEVELOPMENT                                                       | 3   | 0.802462585  | 1.643154885  | 0.0318931 | 0.3468381 | 0.3244361 | 39  |
| HP_RECURRENT_SINUSPULOMONARY_INFECTIONS                                             | HP_RECURRENT_SINUSPULOMONARY_INFECTIONS                                             | HP_RECURRENT_SINUSPULOMONARY_INFECTIONS                                             | 4   | -0.687849862 | -1.539731215 | 0.0319931 | 0.3475191 | 0.3250741 | 207 |
| GOBP_POSITIVE_REGULATION_OF_IMMUNE_SYSTEM_PROCESS                                   | GOBP_POSITIVE_REGULATION_OF_IMMUNE_SYSTEM_PROCESS                                   | GOBP_POSITIVE_REGULATION_OF_IMMUNE_SYSTEM_PROCESS                                   | 89  | -0.259380906 | -1.595060637 | 0.0320191 | 0.3475191 | 0.3250741 | 178 |
| GOBP_REGULATION_OF_RAB_PROTEIN_SIGNAL_TRANSDUCTION                                  | GOBP_REGULATION_OF_RAB_PROTEIN_SIGNAL_TRANSDUCTION                                  | GOBP_REGULATION_OF_RAB_PROTEIN_SIGNAL_TRANSDUCTION                                  | 1   | -0.990670059 | -1.314577797 | 0.0322381 | 0.3493491 | 0.3267851 | 13  |
| HP_HORSESHOE_KIDNEY                                                                 | HP_HORSESHOE_KIDNEY                                                                 | HP_HORSESHOE_KIDNEY                                                                 | 23  | 0.31862141   | 1.596849293  | 0.0322521 | 0.3493491 | 0.3267851 | 274 |
| GOBF_CHROMATIN_DNA_BINDING                                                          | GOBF_CHROMATIN_DNA_BINDING                                                          | GOBF_CHROMATIN_DNA_BINDING                                                          | 15  | -0.466094421 | -1.66870421  | 0.0324061 | 0.3506621 | 0.3280141 | 638 |
| GOBP_NEGATIVE_REGULATION_OF_INTRACELLULAR_SIGNAL_TRANSDUCTION                       | GOBP_NEGATIVE_REGULATION_OF_INTRACELLULAR_SIGNAL_TRANSDUCTION                       | GOBP_NEGATIVE_REGULATION_OF_INTRACELLULAR_SIGNAL_TRANSDUCTION                       | 66  | 0.213987525  | 1.584501988  | 0.0325861 | 0.3522631 | 0.3295121 | 42  |
| GOBP_REGULATION_OF_PROTEIN_POLYMERIZATION                                           | GOBP_REGULATION_OF_PROTEIN_POLYMERIZATION                                           | GOBP_REGULATION_OF_PROTEIN_POLYMERIZATION                                           | 22  | 0.345936195  | 1.704799454  | 0.0331601 | 0.3581131 | 0.3348641 | 34  |
| HP_COARCTATION_OF_AORTA                                                             | HP_COARCTATION_OF_AORTA                                                             | HP_COARCTATION_OF_AORTA                                                             | 26  | 0.306608906  | 1.630438354  | 0.0332731 | 0.3589821 | 0.3357971 | 274 |
| HP_KYPHOSIS                                                                         | HP_KYPHOSIS                                                                         | HP_KYPHOSIS                                                                         | 45  | -0.320925703 | -1.659952552 | 0.0333771 | 0.3597461 | 0.3365111 | 239 |
| GOBP_REGULATION_OF_EXTENT_OF_CELL_GROWTH                                            | GOBP_REGULATION_OF_EXTENT_OF_CELL_GROWTH                                            | GOBP_REGULATION_OF_EXTENT_OF_CELL_GROWTH                                            | 11  | -0.49851337  | -1.616937555 | 0.0334861 | 0.3605771 | 0.3372701 | 471 |
| GOBP_MICROTUBULE_CYTOSKELETON_ORGANIZATION                                          | GOBP_MICROTUBULE_CYTOSKELETON_ORGANIZATION                                          | GOBP_MICROTUBULE_CYTOSKELETON_ORGANIZATION                                          | 37  | 0.263576879  | 1.605719256  | 0.0335321 | 0.3607021 | 0.3374061 | 30  |
| GOBP_POSITIVE_REGULATION_OF_FIBROBLAST_PROLIFERATION                                | GOBP_POSITIVE_REGULATION_OF_FIBROBLAST_PROLIFERATION                                | GOBP_POSITIVE_REGULATION_OF_FIBROBLAST_PROLIFERATION                                | 3   | 0.793853851  | 1.625527293  | 0.0338251 | 0.3633911 | 0.3399211 | 39  |
| GOBP_PATTERN_RECOGNITION_RECEPTOR_SIGNALING_PATHWAY                                 | GOBP_PATTERN_RECOGNITION_RECEPTOR_SIGNALING_PATHWAY                                 | GOBP_PATTERN_RECOGNITION_RECEPTOR_SIGNALING_PATHWAY                                 | 21  | 0.3232934021 | 1.630580993  | 0.0339341 | 0.3633911 | 0.3399211 | 46  |
| GOBP_CYTOPLASMIC_PATTERN_RECOGNITION_RECEPTOR_SIGNALING_PATHWAY                     | GOBP_CYTOPLASMIC_PATTERN_RECOGNITION_RECEPTOR_SIGNALING_PATHWAY                     | GOBP_CYTOPLASMIC_PATTERN_RECOGNITION_RECEPTOR_SIGNALING_PATHWAY                     | 13  | 0.416744434  | 1.661451243  | 0.0339611 | 0.3633911 | 0.3399211 | 162 |
| GOBF_OXIDOREDUCTASE_ACTIVITY_ACTING_ON_METAL_IONS                                   | GOBF_OXIDOREDUCTASE_ACTIVITY_ACTING_ON_METAL_IONS                                   | GOBF_OXIDOREDUCTASE_ACTIVITY_ACTING_ON_METAL_IONS                                   | 2   | 0.86417657   | 1.508596799  | 0.0339671 | 0.3633911 | 0.3399211 | 26  |
| GOBF_PROTEIN_PHOSPHATASE_1_BINDING                                                  | GOBF_PROTEIN_PHOSPHATASE_1_BINDING                                                  | GOBF_PROTEIN_PHOSPHATASE_1_BINDING                                                  | 1   | 0.993214589  | 1.323861476  | 0.0339711 | 0.3633911 | 0.3399211 | 9   |
| GOBP_REGULATION_OF_MITOCHONDRIAL_MEMBRANE_PERMEABILITY                              | GOBP_REGULATION_OF_MITOCHONDRIAL_MEMBRANE_PERMEABILITY                              | GOBP_REGULATION_OF_MITOCHONDRIAL_MEMBRANE_PERMEABILITY                              | 7   | 0.542989629  | 1.633987936  | 0.0339831 | 0.3633911 | 0.3399211 | 97  |
| GOBP_REGULATION_OF_CARBOHYDRATE_BIOSYNTHETIC_PROCESS                                | GOBP_REGULATION_OF_CARBOHYDRATE_BIOSYNTHETIC_PROCESS                                | GOBP_REGULATION_OF_CARBOHYDRATE_BIOSYNTHETIC_PROCESS                                | 14  | -0.454110673 | -1.600387093 | 0.0342191 | 0.3655601 | 0.3419561 | 456 |
| HP_ABNORMAL_SOFT_PALATE_MORPHOLOGY                                                  | HP_ABNORMAL_SOFT_PALATE_MORPHOLOGY                                                  | HP_ABNORMAL_SOFT_PALATE_MORPHOLOGY                                                  | 26  | 0.305565638  | 1.624890624  | 0.0342741 | 0.3657871 | 0.3421621 | 279 |
| GOBP_ADAPTIVE_IMMUNE_RESPONSE_BASED_ON_SOMATIC_RECOMBINATION_OF_IMMUNOGLOBULIN_GENE | GOBP_ADAPTIVE_IMMUNE_RESPONSE_BASED_ON_SOMATIC_RECOMBINATION_OF_IMMUNOGLOBULIN_GENE | GOBP_ADAPTIVE_IMMUNE_RESPONSE_BASED_ON_SOMATIC_RECOMBINATION_OF_IMMUNOGLOBULIN_GENE | 31  | -0.360655722 | -1.645761481 | 0.0343401 | 0.3661321 | 0.3424851 | 276 |
| HP_ABNORMAL_CIRCULATING_CARBOHYDRATE_CONCENTRATION                                  | HP_ABNORMAL_CIRCULATING_CARBOHYDRATE_CONCENTRATION                                  | HP_ABNORMAL_CIRCULATING_CARBOHYDRATE_CONCENTRATION                                  | 8   | -0.569870923 | -1.635609726 | 0.0344391 | 0.3664671 | 0.3427991 | 239 |
| HP_INCREASED_SERUM_PYRUVATE                                                         | HP_INCREASED_SERUM_PYRUVATE                                                         | HP_INCREASED_SERUM_PYRUVATE                                                         | 8   | -0.569870923 | -1.635609726 | 0.0344391 | 0.3664671 | 0.3427991 | 239 |
| GOBP_REGULATION_OF_TRANSPORTER_ACTIVITY                                             | GOBP_REGULATION_OF_TRANSPORTER_ACTIVITY                                             | GOBP_REGULATION_OF_TRANSPORTER_ACTIVITY                                             | 15  | -0.483204156 | -1.65835653  | 0.0346101 | 0.3679281 | 0.3441641 | 77  |
| GOBP_REGULATION_OF_TUMOR_NECROSIS_FACTOR_MEDIATED_SIGNALING_PATHWAY                 | GOBP_REGULATION_OF_TUMOR_NECROSIS_FACTOR_MEDIATED_SIGNALING_PATHWAY                 | GOBP_REGULATION_OF_TUMOR_NECROSIS_FACTOR_MEDIATED_SIGNALING_PATHWAY                 | 6   | 0.594525127  | 1.665700409  | 0.0347871 | 0.3684481 | 0.3455881 | 7   |
| HP_ABNORMALITY_OF_THE FONTANELLES_OR CRANIAL_SUTURES                                | HP_ABNORMALITY_OF_THE FONTANELLES_OR CRANIAL_SUTURES                                | HP_ABNORMALITY_OF_THE FONTANELLES_OR CRANIAL_SUTURES                                | 42  | -0.322331669 | -1.632954278 | 0.0348991 | 0.3702731 | 0.3463591 | 433 |
| HP_ABNORMAL_INFLAMMATORY_RESPONSE                                                   | HP_ABNORMAL_INFLAMMATORY_RESPONSE                                                   | HP_ABNORMAL_INFLAMMATORY_RESPONSE                                                   | 109 | -0.243996186 | -1.556001199 | 0.0350661 | 0.3711941 | 0.3472201 | 218 |
| GOBF_MDM2_MDM4_FAMILY_PROTEIN_BINDING                                               | GOBF_MDM2_MDM4_FAMILY_PROTEIN_BINDING                                               | GOBF_MDM2_MDM4_FAMILY_PROTEIN_BINDING                                               | 2   | 0.862478778  | 1.505632955  | 0.0350811 | 0.3711941 | 0.3472201 | 164 |
| HP_INCOMITANT_STRABISMUS                                                            | HP_INCOMITANT_STRABISMUS                                                            | HP_INCOMITANT_STRABISMUS                                                            | 9   | -0.545839051 | -1.645719171 | 0.0350881 | 0.3711941 | 0.3472201 | 177 |
| HP_UPSLANTED_PALPEBRAL_FISSURE                                                      | HP_UPSLANTED_PALPEBRAL_FISSURE                                                      | HP_UPSLANTED_PALPEBRAL_FISSURE                                                      | 35  | -0.339605142 | -1.621177049 | 0.0353261 | 0.3733441 | 0.3492311 | 670 |
| GOBP_RIG_1_SIGNALING_PATHWAY                                                        | GOBP_RIG_1_SIGNALING_PATHWAY                                                        | GOBP_RIG_1_SIGNALING_PATHWAY                                                        | 8   | -0.565664349 | -1.623536267 | 0.0353891 | 0.3736531 | 0.3495191 | 294 |
| HP_REDUCED_CONSCIOUSNESS_CONFUSION                                                  | HP_REDUCED_CONSCIOUSNESS_CONFUSION                                                  | HP_REDUCED_CONSCIOUSNESS_CONFUSION                                                  | 47  | -0.31373478  | -1.639175279 | 0.0356201 | 0.3757201 | 0.3514541 | 89  |
| HP_ROUND_FACE                                                                       | HP_ROUND_FACE                                                                       | HP_ROUND_FACE                                                                       | 11  | -0.495648519 | -1.607645355 | 0.0357641 | 0.3768751 | 0.3525341 | 173 |
| HP_FRONTAL_CORTICAL_ATROPHY                                                         | HP_FRONTAL_CORTICAL_ATROPHY                                                         | HP_FRONTAL_CORTICAL_ATROPHY                                                         | 10  | -0.525982495 | -1.660471602 | 0.0358181 | 0.3770811 | 0.3527271 | 177 |
| GOBP_RESPONSE_TO_HORMONE                                                            | GOBP_RESPONSE_TO_HORMONE                                                            | GOBP_RESPONSE_TO_HORMONE                                                            | 83  | 0.182196645  | 1.464981392  | 0.0359401 | 0.3774181 | 0.3530421 | 82  |
| GOBP_NEGATIVE_REGULATION_OF_SPROUTING_ANGIOGENESIS                                  | GOBP_NEGATIVE_REGULATION_OF_SPROUTING_ANGIOGENESIS                                  | GOBP_NEGATIVE_REGULATION_OF_SPROUTING_ANGIOGENESIS                                  | 1   | 0.992366412  | 1.322730937  | 0.0359891 | 0.3774181 | 0.3530421 | 10  |
| GOBP_POSITIVE_REGULATION_OF_RETINOIC_ACID_RECEPTOR_SIGNALING_PATHWAY                | GOBP_POSITIVE_REGULATION_OF_RETINOIC_ACID_RECEPTOR_SIGNALING_PATHWAY                | GOBP_POSITIVE_REGULATION_OF_RETINOIC_ACID_RECEPTOR_SIGNALING_PATHWAY                | 1   | 0.992366412  | 1.322730937  | 0.0359891 | 0.3774181 | 0.3530421 | 10  |
| GOBP_TYPE_1_PNEUMOCYTE_DIFFERENTIATION                                              | GOBP_TYPE_1_PNEUMOCYTE_DIFFERENTIATION                                              | GOBP_TYPE_1_PNEUMOCYTE_DIFFERENTIATION                                              | 1   | 0.992366412  | 1.322730937  | 0.0359891 | 0.3774181 | 0.3530421 | 10  |
| GOBP_TRANSLATIONAL_INITIATION                                                       | GOBP_TRANSLATIONAL_INITIATION                                                       | GOBP_TRANSLATIONAL_INITIATION                                                       | 27  | 0.304099115  | 1.641541202  | 0.0362451 | 0.3797361 | 0.3552101 | 277 |
| GOBP_POSITIVE_REGULATION_OF_MULTICELLULAR_ORGANISMAL_PROCESS                        | GOBP_POSITIVE_REGULATION_OF_MULTICELLULAR_ORGANISMAL_PROCESS                        | GOBP_POSITIVE_REGULATION_OF_MULTICELLULAR_ORGANISMAL_PROCESS                        | 118 | 0.165411953  | 1.433240362  | 0.0363151 | 0.3800351 | 0.3554901 | 48  |
| GOCC_SECRETORY_VESICLE                                                              | GOCC_SECRETORY_VESICLE                                                              | GOCC_SECRETORY_VESICLE                                                              | 81  | 0.190197573  | 1.51107085   | 0.0363431 | 0.3800351 | 0.3554901 | 141 |
| HP_MACULE                                                                           | HP_MACULE                                                                           | HP_MACULE                                                                           | 25  | -0.389196642 | -1.649500479 | 0.0364651 | 0.3807421 | 0.3561511 | 437 |
| GOBP_MITOCHONDRIAL_TRANSPORT                                                        | GOBP_MITOCHONDRIAL_TRANSPORT                                                        | GOBP_MITOCHONDRIAL_TRANSPORT                                                        | 24  | 0.312818759  | 1.631189476  | 0.0365081 | 0.3807421 | 0.3561511 | 206 |
| HP_CONGENITAL_STATIONARY_NIGHT_BLINDNESS                                            | HP_CONGENITAL_STATIONARY_NIGHT_BLINDNESS                                            | HP_CONGENITAL_STATIONARY_NIGHT_BLINDNESS                                            | 1   | -0.988973707 | -1.312326808 | 0.0365701 | 0.3807421 | 0.3561511 | 15  |
| HP_MULTIFOCAL_CEREBRAL_WHITE_MATTER_ABNORMALITIES                                   | HP_MULTIFOCAL_CEREBRAL_WHITE_MATTER_ABNORMALITIES                                   | HP_MULTIFOCAL_CEREBRAL_WHITE_MATTER_ABNORMALITIES                                   | 1   | -0.988973707 | -1.312326808 | 0.0365701 | 0.3807421 | 0.3561511 | 15  |
| GOBP_TUMOR_NECROSIS_FACTOR_MEDIATED_SIGNALING_PATHWAY                               | GOBP_TUMOR_NECROSIS_FACTOR_MEDIATED_SIGNALING_PATHWAY                               | GOBP_TUMOR_NECROSIS_FACTOR_MEDIATED_SIGNALING_PATHWAY                               | 14  | 0.406741663  | 1.644155234  | 0.0365861 | 0.3807421 | 0.3561511 | 26  |
| GOBP_POSITIVE_REGULATION_OF_CELLULAR_COMPONENT_BIOGENESIS                           | GOBP_POSITIVE_REGULATION_OF_CELLULAR_COMPONENT_BIOGENESIS                           | GOBP_POSITIVE_REGULATION_OF_CELLULAR_COMPONENT_BIOGENESIS                           | 35  | 0.265607008  | 1.591391034  | 0.0368391 | 0.3830111 | 0.3582741 | 34  |
| GOBP_ALDEHYDE_CATABOLIC_PROCESS                                                     | GOBP_ALDEHYDE_CATABOLIC_PROCESS                                                     | GOBP_ALDEHYDE_CATABOLIC_PROCESS                                                     | 2   | 0.859083192  | 1.499705266  | 0.0369371 | 0.3832991 | 0.3585431 | 168 |
| GOBP_AMINE_BIOSYNTHETIC_PROCESS                                                     | GOBP_AMINE_BIOSYNTHETIC_PROCESS                                                     | GOBP_AMINE_BIOSYNTHETIC_PROCESS                                                     | 2   | 0.859083192  | 1.499705266  | 0.0369371 | 0.3832991 | 0.3585431 | 168 |
| GOBP_CELL_JUNCTION_ASSEMBLY                                                         | GOBP_CELL_JUNCTION_ASSEMBLY                                                         | GOBP_CELL_JUNCTION_ASSEMBLY                                                         | 20  | -0.414395531 | -1.651243432 | 0.0370371 | 0.3839631 | 0.3591651 | 318 |
| GOBP_REGULATION_OF_MEMBRANE_PERMEABILITY                                            | GOBP_REGULATION_OF_MEMBRANE_PERMEABILITY                                            | GOBP_REGULATION_OF_MEMBRANE_PERMEABILITY                                            | 8   | 0.494985368  | 1.585051836  | 0.0370971 | 0.3842281 | 0.3594101 | 97  |
| GOBP_REGULATION_OF_ORGANELLE_ASSEMBLY                                               | GOBP_REGULATION_OF_ORGANELLE_ASSEMBLY                                               | GOBP_REGULATION_OF_ORGANELLE_ASSEMBLY                                               | 20  | 0.352259387  | 1.684537503  | 0.0371521 | 0.3844281 | 0.3595991 | 34  |
| GOBP_CELLULAR_RESPONSE_TO_EXTERNAL_STIMULUS                                         | GOBP_CELLULAR_RESPONSE_TO_EXTERNAL_STIMULUS                                         | GOBP_CELLULAR_RESPONSE_TO_EXTERNAL_STIMULUS                                         | 31  | 0.285818797  | 1.644658518  | 0.0374011 | 0.3866401 | 0.3616091 | 69  |
| GOBP_IMMUNE_EFFECTOR_PROCESS                                                        | GOBP_IMMUNE_EFFECTOR_PROCESS                                                        | GOBP_IMMUNE_EFFECTOR_PROCESS                                                        | 55  | -0.294545508 | -1.612875411 | 0.0378091 | 0.3904841 | 0.3652641 | 288 |
| GOBP_EPITHELIAL_CELL_PROLIFERATION                                                  | GOBP_EPITHELIAL_CELL_PROLIFERATION                                                  | GOBP_EPITHELIAL_CELL_PROLIFERATION                                                  | 23  | 0.313291416  | 1.570136718  | 0.0382151 | 0.3942961 | 0.3688301 | 112 |
| GOCC_CLATHRIN_SCULPTED_GAMMA_AMMINOBUTYRIC_ACID_TRANSPORT_VESICLE                   | GOCC_CLATHRIN_SCULPTED_GAMMA_AMMINOBUTYRIC_ACID_TRANSPORT_VESICLE                   | GOCC_CLATHRIN_SCULPTED_GAMMA_AMMINOBUTYRIC_ACID_TRANSPORT_VESICLE                   | 2   | 0.858234295  | 1.498223344  | 0.0384261 | 0.3957251 | 0.3701671 | 169 |
| GOCC_CLATHRIN_SCULPTED_VESICLE                                                      | GOCC_CLATHRIN_SCULPTED_VESICLE                                                      | GOCC_CLATHRIN_SCULPTED_VESICLE                                                      | 2   | 0.858234295  | 1.498223344  | 0.0384261 | 0.3957251 | 0.3       |     |

|                                                                     |                                                                     |                                                                     |     |              |              |           |          |          |     |
|---------------------------------------------------------------------|---------------------------------------------------------------------|---------------------------------------------------------------------|-----|--------------|--------------|-----------|----------|----------|-----|
| HP_YELLOW_BROWN_DISCOLORATION_OF_THE_TEETH                          | HP_YELLOW_BROWN_DISCOLORATION_OF_THE_TEETH                          | HP_YELLOW_BROWN_DISCOLORATION_OF_THE_TEETH                          | 1   | -0.987277354 | -1.310075819 | 0.0414468 | 0.406066 | 0.379840 | 17  |
| HP_ABNORMAL_HAIR_MORPHOLOGY                                         | HP_ABNORMAL_HAIR_MORPHOLOGY                                         | HP_ABNORMAL_HAIR_MORPHOLOGY                                         | 127 | -0.23021694  | -1.511145051 | 0.041518  | 0.406401 | 0.380154 | 177 |
| HP_ABNORMALITY_OF_THE_CURVATURE_OF_THE_VERTEBRAL_COLUMN             | HP_ABNORMALITY_OF_THE_CURVATURE_OF_THE_VERTEBRAL_COLUMN             | HP_ABNORMALITY_OF_THE_CURVATURE_OF_THE_VERTEBRAL_COLUMN             | 101 | -0.247906153 | -1.533014461 | 0.041564  | 0.406490 | 0.380236 | 600 |
| HP_GENERALIZED_HYPOTONIA                                            | HP_GENERALIZED_HYPOTONIA                                            | HP_GENERALIZED_HYPOTONIA                                            | 94  | -0.245954927 | -1.522585037 | 0.041769  | 0.408120 | 0.381761 | 491 |
| HP_ABNORMAL_AORTIC_VALVE_PHYSIOLOGY                                 | HP_ABNORMAL_AORTIC_VALVE_PHYSIOLOGY                                 | HP_ABNORMAL_AORTIC_VALVE_PHYSIOLOGY                                 | 13  | -0.468873889 | -1.607159805 | 0.041825  | 0.408220 | 0.381855 | 325 |
| GOBP_CELL_CELL_SIGNALING                                            | GOBP_CELL_CELL_SIGNALING                                            | GOBP_CELL_CELL_SIGNALING                                            | 34  | -0.33528219  | -1.58799528  | 0.041891  | 0.408220 | 0.381855 | 456 |
| HP_FUNCTIONAL_ABNORMALITY_OF_THE_MIDDLE_EAR                         | HP_FUNCTIONAL_ABNORMALITY_OF_THE_MIDDLE_EAR                         | HP_FUNCTIONAL_ABNORMALITY_OF_THE_MIDDLE_EAR                         | 73  | -0.262334239 | -1.531528633 | 0.041878  | 0.408220 | 0.381855 | 464 |
| GOBP_POSITIVE_REGULATION_OF_CANONICAL_WNT_SIGNALING_PATHWAY         | GOBP_POSITIVE_REGULATION_OF_CANONICAL_WNT_SIGNALING_PATHWAY         | GOBP_POSITIVE_REGULATION_OF_CANONICAL_WNT_SIGNALING_PATHWAY         | 9   | -0.53600444  | -1.616067556 | 0.042059  | 0.409488 | 0.383041 | 230 |
| HP_LETHARGY                                                         | HP_LETHARGY                                                         | HP_LETHARGY                                                         | 26  | 0.29854118   | 1.587537023  | 0.042280  | 0.411268 | 0.384706 | 276 |
| GOBP_CELLULAR_RESPONSE_TO_STARVATION                                | GOBP_CELLULAR_RESPONSE_TO_STARVATION                                | GOBP_CELLULAR_RESPONSE_TO_STARVATION                                | 22  | 0.335625141  | 1.653985811  | 0.042414  | 0.412204 | 0.385582 | 36  |
| HP_DIALECTIC_SEIZURE                                                | HP_DIALECTIC_SEIZURE                                                | HP_DIALECTIC_SEIZURE                                                | 26  | -0.379179985 | -1.621356241 | 0.042674  | 0.414285 | 0.387528 | 242 |
| GOMF_MOLECULAR_FUNCTION_REGULATOR                                   | GOMF_MOLECULAR_FUNCTION_REGULATOR                                   | GOMF_MOLECULAR_FUNCTION_REGULATOR                                   | 136 | 0.161743389  | 1.437588978  | 0.042713  | 0.414285 | 0.387528 | 50  |
| GOBP_REGULATION_OF_DNA_BINDING_TRANSCRIPTION_FACTOR_ACTIVITY        | GOBP_REGULATION_OF_DNA_BINDING_TRANSCRIPTION_FACTOR_ACTIVITY        | GOBP_REGULATION_OF_DNA_BINDING_TRANSCRIPTION_FACTOR_ACTIVITY        | 42  | 0.232455915  | 1.483361384  | 0.042786  | 0.414285 | 0.387528 | 26  |
| GOBP_ANATOMICAL_STRUCTURE_FORMATION_INVOLVED_IN_MORPHOGENESIS       | GOBP_ANATOMICAL_STRUCTURE_FORMATION_INVOLVED_IN_MORPHOGENESIS       | GOBP_ANATOMICAL_STRUCTURE_FORMATION_INVOLVED_IN_MORPHOGENESIS       | 79  | 0.193891035  | 1.529580277  | 0.042794  | 0.414285 | 0.387528 | 73  |
| HP_ABNORMALITY_OF_THE_LARYNX                                        | HP_ABNORMALITY_OF_THE_LARYNX                                        | HP_ABNORMALITY_OF_THE_LARYNX                                        | 21  | -0.396210916 | -1.597194375 | 0.042857  | 0.414285 | 0.387528 | 458 |
| HP_INTERICTAL_EEG_ABNORMALITY                                       | HP_INTERICTAL_EEG_ABNORMALITY                                       | HP_INTERICTAL_EEG_ABNORMALITY                                       | 21  | -0.396668326 | -1.598978207 | 0.042857  | 0.414285 | 0.387528 | 270 |
| GOCC_RNA_POLYMERASE_II_TRANSCRIPTION_REGULATOR_COMPLEX              | GOCC_RNA_POLYMERASE_II_TRANSCRIPTION_REGULATOR_COMPLEX              | GOCC_RNA_POLYMERASE_II_TRANSCRIPTION_REGULATOR_COMPLEX              | 28  | 0.292083767  | 1.590853237  | 0.043084  | 0.416116 | 0.389241 | 82  |
| GOBP_REGULATION_OF_B_CELL_ACTIVATION                                | GOBP_REGULATION_OF_B_CELL_ACTIVATION                                | GOBP_REGULATION_OF_B_CELL_ACTIVATION                                | 16  | -0.435096932 | -1.604412004 | 0.043227  | 0.417125 | 0.390185 | 178 |
| GOBP_CAMP_CATABOLIC_PROCESS                                         | GOBP_CAMP_CATABOLIC_PROCESS                                         | GOBP_CAMP_CATABOLIC_PROCESS                                         | 2   | -0.847198642 | -1.439613441 | 0.043405  | 0.417362 | 0.390406 | 183 |
| GOBP_CAMP_METABOLIC_PROCESS                                         | GOBP_CAMP_METABOLIC_PROCESS                                         | GOBP_CAMP_METABOLIC_PROCESS                                         | 2   | -0.847198642 | -1.439613441 | 0.043405  | 0.417362 | 0.390406 | 183 |
| GOBP_CYCLIC_NUCLEOTIDE_CATABOLIC_PROCESS                            | GOBP_CYCLIC_NUCLEOTIDE_CATABOLIC_PROCESS                            | GOBP_CYCLIC_NUCLEOTIDE_CATABOLIC_PROCESS                            | 2   | -0.847198642 | -1.439613441 | 0.043405  | 0.417362 | 0.390406 | 183 |
| GOBP_CYCLIC_NUCLEOTIDE_METABOLIC_PROCESS                            | GOBP_CYCLIC_NUCLEOTIDE_METABOLIC_PROCESS                            | GOBP_CYCLIC_NUCLEOTIDE_METABOLIC_PROCESS                            | 2   | -0.847198642 | -1.439613441 | 0.043405  | 0.417362 | 0.390406 | 183 |
| HP_ABNORMAL_BLOOD_ION_CONCENTRATION                                 | HP_ABNORMAL_BLOOD_ION_CONCENTRATION                                 | HP_ABNORMAL_BLOOD_ION_CONCENTRATION                                 | 22  | -0.39859479  | -1.634268394 | 0.043600  | 0.418224 | 0.391212 | 517 |
| HP_ANEMIA_OF_INADEQUATE_PRODUCTION                                  | HP_ANEMIA_OF_INADEQUATE_PRODUCTION                                  | HP_ANEMIA_OF_INADEQUATE_PRODUCTION                                  | 28  | 0.291809465  | 1.589359232  | 0.043613  | 0.418224 | 0.391212 | 304 |
| GOBP_PHOSPHATIDYLCHOLINE_ACYL_CHAIN_REMODELING                      | GOBP_PHOSPHATIDYLCHOLINE_ACYL_CHAIN_REMODELING                      | GOBP_PHOSPHATIDYLCHOLINE_ACYL_CHAIN_REMODELING                      | 2   | 0.848896435  | 1.4819222    | 0.043649  | 0.418224 | 0.391212 | 180 |
| HP_SHORT_FACE                                                       | HP_SHORT_FACE                                                       | HP_SHORT_FACE                                                       | 2   | 0.846349745  | 1.477476433  | 0.043649  | 0.418224 | 0.391212 | 183 |
| GOBP_MYELOID_CELL_HOMEOSTASIS                                       | GOBP_MYELOID_CELL_HOMEOSTASIS                                       | GOBP_MYELOID_CELL_HOMEOSTASIS                                       | 25  | 0.309987609  | 1.636085285  | 0.043743  | 0.418716 | 0.391673 | 73  |
| GOBP_REGULATION_OF_MULTICELLULAR_ORGANISMAL_DEVELOPMENT             | GOBP_REGULATION_OF_MULTICELLULAR_ORGANISMAL_DEVELOPMENT             | GOBP_REGULATION_OF_MULTICELLULAR_ORGANISMAL_DEVELOPMENT             | 102 | 0.185263545  | 1.561880241  | 0.043777  | 0.418716 | 0.391673 | 39  |
| HP_ABNORMAL_TESTIS_MORPHOLOGY                                       | HP_ABNORMAL_TESTIS_MORPHOLOGY                                       | HP_ABNORMAL_TESTIS_MORPHOLOGY                                       | 70  | -0.269665026 | -1.551834276 | 0.043984  | 0.420105 | 0.392972 | 491 |
| HP_RELATIVE_MACROCEPHALY                                            | HP_RELATIVE_MACROCEPHALY                                            | HP_RELATIVE_MACROCEPHALY                                            | 12  | -0.479508061 | -1.596188681 | 0.044072  | 0.420105 | 0.392972 | 206 |
| GOMF_TRANSCRIPTION_COACTIVATOR_ACTIVITY                             | GOMF_TRANSCRIPTION_COACTIVATOR_ACTIVITY                             | GOMF_TRANSCRIPTION_COACTIVATOR_ACTIVITY                             | 36  | -0.325791213 | -1.570523944 | 0.044354  | 0.420105 | 0.392972 | 495 |
| GOBP_EPITHELIUM_DEVELOPMENT                                         | GOBP_EPITHELIUM_DEVELOPMENT                                         | GOBP_EPITHELIUM_DEVELOPMENT                                         | 65  | 0.209388371  | 1.550911853  | 0.044364  | 0.420105 | 0.392972 | 73  |
| GOCC_NEURON_PROJECTION_TERMINUS                                     | GOCC_NEURON_PROJECTION_TERMINUS                                     | GOCC_NEURON_PROJECTION_TERMINUS                                     | 8   | 0.479600111  | 1.535784868  | 0.044411  | 0.420105 | 0.392972 | 178 |
| GOCC_ROUGH_ENDOPLASMIC_RETICULUM_MEMBRANE                           | GOCC_ROUGH_ENDOPLASMIC_RETICULUM_MEMBRANE                           | GOCC_ROUGH_ENDOPLASMIC_RETICULUM_MEMBRANE                           | 8   | 0.480375427  | 1.538267597  | 0.044411  | 0.420105 | 0.392972 | 617 |
| HP_LARGE_BASAL_GANGLIA                                              | HP_LARGE_BASAL_GANGLIA                                              | HP_LARGE_BASAL_GANGLIA                                              | 7   | -0.557977666 | -1.628080533 | 0.044444  | 0.420105 | 0.392972 | 234 |
| GOBP_ESTABLISHMENT_OF_MITOCHONDRION_LOCALIZATION                    | GOBP_ESTABLISHMENT_OF_MITOCHONDRION_LOCALIZATION                    | GOBP_ESTABLISHMENT_OF_MITOCHONDRION_LOCALIZATION                    | 1   | 0.988973707  | 1.31820878   | 0.044734  | 0.420105 | 0.392972 | 14  |
| GOBP_FAT_PAD_DEVELOPMENT                                            | GOBP_FAT_PAD_DEVELOPMENT                                            | GOBP_FAT_PAD_DEVELOPMENT                                            | 1   | 0.988973707  | 1.31820878   | 0.044734  | 0.420105 | 0.392972 | 14  |
| GOBP_HYPOTHALAMUS_CELL_DIFFERENTIATION                              | GOBP_HYPOTHALAMUS_CELL_DIFFERENTIATION                              | GOBP_HYPOTHALAMUS_CELL_DIFFERENTIATION                              | 1   | 0.988973707  | 1.31820878   | 0.044734  | 0.420105 | 0.392972 | 14  |
| GOBP_HYPOTHALAMUS_GONADOTROPHIN_RELEASING_HORMONE_NEURON_DIFFERENCE | GOBP_HYPOTHALAMUS_GONADOTROPHIN_RELEASING_HORMONE_NEURON_DIFFERENCE | GOBP_HYPOTHALAMUS_GONADOTROPHIN_RELEASING_HORMONE_NEURON_DIFFERENCE | 1   | 0.988973707  | 1.31820878   | 0.044734  | 0.420105 | 0.392972 | 14  |
| GOBP_MALE_MEIOSIS_I                                                 | GOBP_MALE_MEIOSIS_I                                                 | GOBP_MALE_MEIOSIS_I                                                 | 1   | 0.988973707  | 1.31820878   | 0.044734  | 0.420105 | 0.392972 | 14  |
| GOBP_MALE_MEIOTIC_NUCLEAR_DIVISION                                  | GOBP_MALE_MEIOTIC_NUCLEAR_DIVISION                                  | GOBP_MALE_MEIOTIC_NUCLEAR_DIVISION                                  | 1   | 0.988973707  | 1.31820878   | 0.044734  | 0.420105 | 0.392972 | 14  |
| GOBP_RESPONSE_TO_GRAVITY                                            | GOBP_RESPONSE_TO_GRAVITY                                            | GOBP_RESPONSE_TO_GRAVITY                                            | 1   | 0.988973707  | 1.31820878   | 0.044734  | 0.420105 | 0.392972 | 13  |
| GOBP_RESPONSE_TO_IMMOBILIZATION_STRESS                              | GOBP_RESPONSE_TO_IMMOBILIZATION_STRESS                              | GOBP_RESPONSE_TO_IMMOBILIZATION_STRESS                              | 1   | 0.988973707  | 1.31820878   | 0.044734  | 0.420105 | 0.392972 | 13  |
| HP_INCREASED_C_PEPTIDE_LEVEL                                        | HP_INCREASED_C_PEPTIDE_LEVEL                                        | HP_INCREASED_C_PEPTIDE_LEVEL                                        | 1   | 0.988973707  | 1.31820878   | 0.044734  | 0.420105 | 0.392972 | 13  |
| HP_NASAL_REGURGITATION                                              | HP_NASAL_REGURGITATION                                              | HP_NASAL_REGURGITATION                                              | 1   | 0.988973707  | 1.31820878   | 0.044734  | 0.420105 | 0.392972 | 14  |
| HP_OVERGROWTH_OF_EXTERNAL_GENITALIA                                 | HP_OVERGROWTH_OF_EXTERNAL_GENITALIA                                 | HP_OVERGROWTH_OF_EXTERNAL_GENITALIA                                 | 1   | 0.988973707  | 1.31820878   | 0.044734  | 0.420105 | 0.392972 | 13  |
| HP_PRECOCIOUS_PUBERTY_IN_FEMALES                                    | HP_PRECOCIOUS_PUBERTY_IN_FEMALES                                    | HP_PRECOCIOUS_PUBERTY_IN_FEMALES                                    | 1   | 0.988973707  | 1.31820878   | 0.044734  | 0.420105 | 0.392972 | 13  |
| HP_PROPORTIONATE_TALL_STATURE                                       | HP_PROPORTIONATE_TALL_STATURE                                       | HP_PROPORTIONATE_TALL_STATURE                                       | 1   | 0.988973707  | 1.31820878   | 0.044734  | 0.420105 | 0.392972 | 13  |
| HP_VELOPHARYNGEAL_INSUFFICIENCY                                     | HP_VELOPHARYNGEAL_INSUFFICIENCY                                     | HP_VELOPHARYNGEAL_INSUFFICIENCY                                     | 1   | 0.988973707  | 1.31820878   | 0.044734  | 0.420105 | 0.392972 | 14  |
| GOMF_ATPASE_BINDING                                                 | GOMF_ATPASE_BINDING                                                 | GOMF_ATPASE_BINDING                                                 | 7   | 0.526606504  | 1.584687125  | 0.044861  | 0.420941 | 0.393754 | 1   |
| HP_CRYPTORCHIDISM                                                   | HP_CRYPTORCHIDISM                                                   | HP_CRYPTORCHIDISM                                                   | 60  | -0.281233483 | -1.575265624 | 0.044929  | 0.421213 | 0.394006 | 442 |
| GOMF_CYTOSKELETAL_MOTOR_ACTIVITY                                    | GOMF_CYTOSKELETAL_MOTOR_ACTIVITY                                    | GOMF_CYTOSKELETAL_MOTOR_ACTIVITY                                    | 2   | -0.844651952 | -1.435286946 | 0.045075  | 0.422215 | 0.394946 | 188 |
| GOBP_REGULATION_OF_PROTEIN_CATABOLIC_PROCESS                        | GOBP_REGULATION_OF_PROTEIN_CATABOLIC_PROCESS                        | GOBP_REGULATION_OF_PROTEIN_CATABOLIC_PROCESS                        | 51  | 0.23117039   | 1.565583951  | 0.045134  | 0.422416 | 0.395128 | 47  |
| HP_ABNORMAL_CARDIAC_VENTRICLE_MORPHOLOGY                            | HP_ABNORMAL_CARDIAC_VENTRICLE_MORPHOLOGY                            | HP_ABNORMAL_CARDIAC_VENTRICLE_MORPHOLOGY                            | 67  | -0.271770445 | -1.551068063 | 0.045395  | 0.424485 | 0.392700 | 173 |
| GOBP_POSITIVE_REGULATION_OF_PEPTIDYL_LYSINE_ACETYLTATION            | GOBP_POSITIVE_REGULATION_OF_PEPTIDYL_LYSINE_ACETYLTATION            | GOBP_POSITIVE_REGULATION_OF_PEPTIDYL_LYSINE_ACETYLTATION            | 3   | -0.768054376 | -1.529853829 | 0.045528  | 0.424997 | 0.397548 | 277 |
| GOBP_POSITIVE_REGULATION_OF_PROTEIN_ACETYLTATION                    | GOBP_POSITIVE_REGULATION_OF_PROTEIN_ACETYLTATION                    | GOBP_POSITIVE_REGULATION_OF_PROTEIN_ACETYLTATION                    | 3   | -0.768054376 | -1.529853829 | 0.045528  | 0.424997 | 0.397548 | 277 |
| HP_ABNORMAL_ACTIVITY_OF_MITOCHONDRIAL_RESPIRATORY_CHAIN             | HP_ABNORMAL_ACTIVITY_OF_MITOCHONDRIAL_RESPIRATORY_CHAIN             | HP_ABNORMAL_ACTIVITY_OF_MITOCHONDRIAL_RESPIRATORY_CHAIN             | 8   | -0.530744796 | -1.523312237 | 0.045813  | 0.426725 | 0.399164 | 75  |
| HP_HEMORRHAGE_OF_THE_EYE                                            | HP_HEMORRHAGE_OF_THE_EYE                                            | HP_HEMORRHAGE_OF_THE_EYE                                            | 8   | -0.530643998 | -1.523022933 | 0.045813  | 0.426725 | 0.399164 | 471 |
| GOBP_REGULATION_OF_T_CELL_MIGRATION                                 | GOBP_REGULATION_OF_T_CELL_MIGRATION                                 | GOBP_REGULATION_OF_T_CELL_MIGRATION                                 | 5   | -0.648366533 | -1.56820441  | 0.045831  | 0.426725 | 0.399164 | 41  |
| GOBP_REGULATION_OF_PATTERN_RECOGNITION_RECEPTOR_SIGNALING_PATHWAY   | GOBP_REGULATION_OF_PATTERN_RECOGNITION_RECEPTOR_SIGNALING_PATHWAY   | GOBP_REGULATION_OF_PATTERN_RECOGNITION_RECEPTOR_SIGNALING_PATHWAY   | 14  | 0.394379186  | 1.5941829    | 0.045907  | 0.427069 | 0.399486 | 7   |
| HP_ABNORMAL_VASCULAR_MORPHOLOGY                                     | HP_ABNORMAL_VASCULAR_MORPHOLOGY                                     | HP_ABNORMAL_VASCULAR_MORPHOLOGY                                     | 103 | -0.244788905 | -1.541930135 | 0.046118  | 0.428647 | 0.400962 | 211 |
| GOMF_UBIQUITIN_LIKE_PROTEIN_TRANSFERASE_ACTIVITY                    | GOMF_UBIQUITIN_LIKE_PROTEIN_TRANSFERASE_ACTIVITY                    | GOMF_UBIQUITIN_LIKE_PROTEIN_TRANSFERASE_ACTIVITY                    | 50  | -0.291884063 | -1.56062095  | 0.046296  | 0.429371 | 0.401640 | 665 |
| HP_FUNCTIONAL_MOTOR_DEFICIT                                         | HP_FUNCTIONAL_MOTOR_DEFICIT                                         | HP_FUNCTIONAL_MOTOR_DEFICIT                                         | 50  | -0.293011609 | -1.566658203 | 0.046296  | 0.429371 | 0.401640 | 270 |
| GOBP GRANULOCYTE MIGRATION                                          | GOBP GRANULOCYTE MIGRATION                                          | GOBP GRANULOCYTE MIGRATION                                          | 10  | -0.509323773 | -1.607881762 | 0.046312  | 0.429371 | 0.401640 | 76  |
| GOCC_CATION_CHANNEL_COMPLEX                                         | GOCC_CATION_CHANNEL_COMPLEX                                         | GOCC_CATION_CHANNEL_COMPLEX                                         | 4   | -0.674979059 | -1.510920311 | 0.0464    | 0.428618 | 0.402052 | 70  |
| GOBP_CHAPERONE_MEDIATED_AUTOPHAGY                                   | GOBP_CHAPERONE_MEDIATED_AUTOPHAGY                                   | GOBP_CHAPERONE_MEDIATED_AUTOPHAGY                                   | 4   | 0.714726747  | 1.647239741  | 0.046659  | 0.430437 | 0.402637 | 19  |
| GOCC_SECRETORY GRANULE                                              | GOCC_SECRETORY GRANULE                                              | GOCC_SECRETORY GRANULE                                              | 74  | 0.208380883  | 1.597794624  | 0.046663  | 0.430437 | 0.402637 | 141 |
| HP_ABNORMAL_BRAINSTEM_MRI_SIGNAL_INTENSITY                          | HP_ABNORMAL_BRAINSTEM_MRI_SIGNAL_INTENSITY                          | HP_ABNORMAL_BRAINSTEM_MRI_SIGNAL_INTENSITY                          | 9   | -0.529910649 | -1.597684615 | 0.046707  | 0.430437 | 0.402637 | 227 |
| GOBP_DETERMINATION_OF_ADULT_LIFESPAN                                | GOBP_DETERMINATION_OF_ADULT_LIFESPAN                                | GOBP_DETERMINATION_OF_ADULT_LIFESPAN                                | 2   | -0.842105063 | -1.430958451 | 0.046744  | 0.430437 | 0.402637 | 189 |
| GOMF_ARYL_HYDROCARBON_RECEPTOR_BINDING                              | GOMF_ARYL_HYDROCARBON_RECEPTOR_BINDING                              | GOMF_ARYL_HYDROCARBON_RECEPTOR_BINDING                              | 2   | -0.84295416  | -1.432400949 | 0.046744  | 0.430437 | 0.402637 | 188 |
| GOMF_INTRONIC_TRANSCRIPTION_REGULATORY_REGION_SEQUENCE_SPECIFIC_DNA | GOMF_INTRONIC_TRANSCRIPTION_REGULATORY_REGION_SEQUENCE_SPECIFIC_DNA | GOMF_INTRONIC_TRANSCRIPTION_REGULATORY_REGION_SEQUENCE_SPECIFIC_DNA | 2   | -0.84295416  | -1.432400949 | 0.046744  | 0.430437 | 0.402637 | 188 |
| HP_RECURRENT_HYPOGLYCEMIA                                           | HP_RECURRENT_HYPOGLYCEMIA                                           | HP_RECURRENT_HYPOGLYCEMIA                                           | 2   | -0.841256367 | -1.429515952 | 0.046744  | 0.430437 | 0.402637 | 190 |
| GOBP_REGULATION_OF_SMALL_GTPASE_MEDIATED_SIGNAL_TRANSDUCTION        | GOBP_REGULATION_OF_SMALL_GTPASE_MEDIATED_SIGNAL_TRANSDUCTION        | GOBP_REGULATION_OF_SMALL_GTPASE_MEDIATED_SIGNAL_TRANSDUCTION        | 30  | -0.346396819 | -1.562649882 | 0.046986  | 0.431472 | 0.403005 | 471 |
| HP_INTELLECTUAL_DISABILITY_MODERATE                                 | HP_INTELLECTUAL_DISABILITY_MODERATE                                 | HP_INTELLECTUAL_DISABILITY_MODERATE                                 | 26  | -0.370331574 | -1.583520839 | 0.046941  | 0.431522 | 0.403652 | 242 |
| HP_SELF_INJURIOUS_BEHAVIOR                                          | HP_SELF_INJURIOUS_BEHAVIOR                                          | HP_SELF_INJURIOUS_BEHAVIOR                                          | 29  | -0.35581836  | -1.589403816 | 0.047156  | 0.432906 | 0.404946 | 632 |
| GOBP_ORGANOPHOSPHATE_CATABOLIC_PROCESS                              | GOBP_ORGANOPHOSPHATE_CATABOLIC_PROCESS                              | GOBP_ORGANOPHOSPHATE_CATABOLIC_PROCESS                              | 9   | -0.528557341 | -1.593614356 | 0.047171  | 0.432906 | 0.404946 | 199 |
| GOBP_REGULATION_OF_METAL_ION_TRANSPORT                              | GOBP_REGULATION_OF_METAL_ION_TRANSPORT                              | GOBP_REGULATION_OF_METAL_ION_TRANSPORT                              | 28  | -0.360193384 | -1.583638816 | 0.047287  | 0.433605 | 0.405600 | 277 |
| HP_NON_HODGKIN_LYMPHOMA                                             | HP_NON_HODGKIN_LYMPHOMA                                             | HP_NON_HODGKIN_LYMPHOMA                                             | 7   | -0.553421414 | -1.512864151 | 0.047619  | 0.436273 | 0.408096 | 167 |
| GOBP_POSITIVE_REGULATION_OF_NUCLEASE_ACTIVITY                       | GOBP_POSITIVE_REGULATION_OF_NUCLEASE_ACTIVITY                       | GOBP_POSITIVE_REGULATION_OF_NUCLEASE_ACTIVITY                       | 3   | 0.773152082  | 1.583137511  | 0.047784  | 0.437010 | 0.408785 | 270 |
| GOMF_SMALL_RIBOSOMAL_SUBUNIT_RRNA_BINDING                           | GOMF_SMALL_RIBOSOMAL_SUBUNIT_RRNA_BINDING                           | GOMF_SMALL_RIBOSOMAL_SUBUNIT_RRNA_BINDING                           | 3   | 0.773152082  | 1.583137511  | 0.047784  | 0.437010 | 0.408785 | 270 |
| GOBP_ALPHA_BETA_T_CELL_ACTIVATION                                   | GOBP_ALPHA_BETA_T_CELL_ACTIVATION                                   | GOBP_ALPHA_BETA_T_CELL_ACTIVATION                                   | 27  | -0.364641708 | -1.579351857 | 0.047819  | 0.437010 | 0.408785 | 276 |
| HP_ABNORMAL_EYEBROW_MORPHOLOGY                                      | HP_ABNORMAL_EYEBROW_MORPHOLOGY                                      | HP_ABNORMAL_EYEBROW_MORPHOLOGY                                      | 68  | -0.268451957 | -1.534747261 | 0.048114  | 0.439136 | 0.410775 | 442 |
| GOBP_ANTERIOR_POSTERIOR_PATTERN_SPECIFICATION                       | GOBP_ANTERIOR_POSTERIOR_PATTERN_SPECIFICATION                       | GOBP_ANTERIOR_POSTERIOR_PATTERN_SPECIFICATION                       | 8   | -0.551107812 | -1.581756957 | 0.048215  | 0.439136 | 0.410775 | 437 |
| GOBP_REGULATION_OF_MYELOID_LEUKOCYTE_MEDIATED_IMMUNITY              | GOBP_REGULATION_OF_MYELOID_LEUKOCYTE_MEDIATED_IMMUNITY              | GOBP_REGULATION_OF_MYELOID_LEUKOCYTE_MEDIATED_IMMUNITY              | 8   | -0.550002006 | -1.578583137 | 0.048215  | 0.439136 | 0.410775 | 266 |
| HP_CHEST_PAIN                                                       | HP_CHEST_PAIN                                                       | HP_CHEST_PAIN                                                       | 8   | -0.549755801 | -1.577876495 | 0.048215  | 0.439136 | 0.410775 | 339 |
| GOBP_POSITIVE_REGULATION_OF_GLIOGENESIS                             | GOBP_POSITIVE_REGULATION_OF_GLIOGENESIS                             | GOBP_POSITIVE_REGULATION_OF_GLIOGENESIS                             | 4   | 0.713435374  | 1.644263497  | 0.048254  | 0.439136 | 0.410775 | 341 |
| HP_SMALL_FOR_GESTATIONAL_AGE                                        | HP_SMALL_FOR_GESTATIONAL_AGE                                        | HP_SMALL_FOR_GESTATIONAL_AGE                                        | 31  | 0.27737398   | 1.596098839  | 0.048322  | 0.439383 | 0.411005 | 443 |
| HP_HYPOREFLEXIA                                                     | HP_HYPOREFLEXIA                                                     | HP_HYPOREFLEXIA                                                     | 36  | -0.323089598 | -1.557500315 | 0.048387  | 0.439484 | 0.411100 | 160 |
| GOMF_CHLORIDE_CHANNEL_INHIBITOR_ACTIVITY                            | GOMF_CHLORIDE_CHANNEL_INHIBITOR_ACTIVITY                            | GOMF_CHLORIDE_CHANNEL_INHIBITOR_ACTIVITY                            | 2   | -0.833935067 | -1.417075137 | 0.048414  | 0.439484 | 0.411100 | 2   |
| GOBP_MYELOID_CELL_ACTIVATION_INVOLVED_IN_IMMUNE_RESPONSE            | GOBP_MYELOID_CELL_ACTIVATION_INVOLVED_IN_IMMUNE_RESPONSE            | GOBP_MYELOID_CELL_ACTIVATION_INVOLVED_IN_IMMUNE_RESPONSE            | 11  | -0.477472764 | -1.54869185  | 0.048     |          |          |     |

[illegible]

|                                 |                                                                                                                                                                                                       |
|---------------------------------|-------------------------------------------------------------------------------------------------------------------------------------------------------------------------------------------------------|
| tags=47%, list=14%, signal=42%  | Fbxo38/Fbxo11/Matr3/Sh3kbp1/mt-Nd4/Ganab/Crebbp/Kcnq5/mt-Atp6/mt-Cytb/mt-Nd1/mt-Co1/mt-Co3/mt-Nd2/mt-Co2/mt-Nd5/mt-Nd4/mt-Nd6                                                                         |
| tags=78%, list=8%, signal=72%   | mt-Nd4/mt-Nd3/mt-Atp6/mt-Nd1/mt-Nd2/mt-Nd5/mt-Nd6                                                                                                                                                     |
| tags=43%, list=8%, signal=41%   | mt-Nd4/mt-Nd3/mt-Atp6/mt-Cytb/mt-Nd1/mt-Co1/mt-Atp8/mt-Co3/mt-Nd2/mt-Co2/mt-Nd5/mt-Nd4/mt-Nd6                                                                                                         |
| tags=52%, list=15%, signal=45%  | Med13/Kras/Ubtff/Tcf4/Kmt2a/Ddx6/mt-Nd4/mt-Nd1/mt-Co1/mt-Co3/mt-Co2/Satb1/mt-Nd5/mt-Nd6                                                                                                               |
| tags=44%, list=12%, signal=40%  | Atad1/Tcf4/Kmt2e/mt-Nd4/mt-Nd3/Mef2c/Kcnq5/mt-Cytb/mt-Nd1/mt-Co1/mt-Co3/mt-Nd2/mt-Co2/mt-Nd5/Nsf/mt-Nd6                                                                                               |
| tags=78%, list=8%, signal=72%   | mt-Nd4/mt-Nd3/mt-Atp6/mt-Nd1/mt-Nd2/mt-Nd5/mt-Nd6                                                                                                                                                     |
| tags=50%, list=10%, signal=46%  | Kmt2e/Ddx6/mt-Nd4/mt-Nd3/mt-Atp6/Ralgapa1/mt-Nd1/mt-Nd2/Satb1/mt-Nd5/mt-Nd6                                                                                                                           |
| tags=59%, list=21%, signal=43%  | Hivep2/Mecp2/Sars/Cux1/Nrkb2/Med13/Son/Zeb2/Tcf4/mt-Nd4/mt-Nd3/Kcnq5/Setd2/mt-Atp6/Pgap1/mt-Nd1/mt-Nd2/Satb1/mt-Nd5/Trappc9/mt-Nd6                                                                    |
| tags=76%, list=8%, signal=71%   | Tpp1/Ctnnb1/Son/mt-Nd4/mt-Atp6/mt-Cytb/mt-Nd1/mt-Co1/mt-Co3/mt-Nd2/mt-Nd5/mt-Nd4/mt-Nd6                                                                                                               |
| tags=63%, list=31%, signal=46%  | Polg/Ranbp2/Tmem127/Stat4/Daxx/Rnf6/Ctnnb1/Krt11/Ndufv1/H2-Q7/Fus/Malt1/Foxp1/Kras/Zeb2/Matr3/Sptbn1/Kmt2e/mt-Nd4/Syk/mt-Nd3/mt-Atp6/mt-Cytb/Birc3/mt-Nd1/mt-Co1/mt-Co3/mt-Nd2/mt-Co2/mt-Nd5/mt-Nd6   |
| tags=41%, list=8%, signal=38%   | mt-Nd4/mt-Nd3/mt-Atp6/mt-Cytb/mt-Nd1/mt-Co1/mt-Atp8/mt-Co3/mt-Nd2/mt-Co2/mt-Nd5/mt-Nd4/mt-Nd6                                                                                                         |
| tags=54%, list=14%, signal=48%  | Fbxo38/Fbxo11/Matr3/Sh3kbp1/Ganab/Crebbp/Kcnq5/mt-Cytb/mt-Nd1/mt-Co1/mt-Co3/mt-Co2/mt-Nd5/mt-Nd6                                                                                                      |
| tags=71%, list=18%, signal=59%  | H2-Q7/Tcrg1/Foxp1/Kras/mt-Nd4/Aff4/mt-Nd1/mt-Co1/mt-Co3/mt-Co2/mt-Nd5/mt-Nd6                                                                                                                          |
| tags=80%, list=10%, signal=72%  | Diaph1/mt-Cytb/mt-Nd1/mt-Co1/mt-Co3/mt-Co2/mt-Nd5/mt-Nd6                                                                                                                                              |
| tags=71%, list=18%, signal=59%  | Atp2c1/H2-Q7/mt-Nd4/mt-Nd1/mt-Co1/mt-Co3/mt-Co2/mt-Nd5/mt-Nd6/Adgr5                                                                                                                                   |
| tags=48%, list=8%, signal=45%   | mt-Nd4/mt-Nd3/mt-Cytb/mt-Nd1/mt-Co1/mt-Co3/mt-Nd2/mt-Co2/mt-Nd5/mt-Nd6                                                                                                                                |
| tags=50%, list=23%, signal=40%  | Pml/Bcl2/Sh2b3/fnfr1/H2-Q7/Malt1/Bcl6/Tcrg1/Foxp1/Sptbn1/Tcf4/Sh3kbp1/mt-Nd4/Syk/mt-Nd3/Bach2/mt-Atp6/mt-Cytb/Birc3/mt-Nd1/mt-Co1/mt-Co3/mt-Nd2/mt-Co2/mt-Nd5/mt-Nd6                                  |
| tags=85%, list=25%, signal=65%  | Rpl31/Rps26/Rpl18/Rps4x/Rpl19/Rp8/Rp38/Rp30/Rps21/Rpl18a/Rpl7a/Rpl24/Rp36a/Rps3/Rps28/Rp39/Larp4b                                                                                                     |
| tags=93%, list=23%, signal=73%  | Rps17/Rpl31/Rps26/Rpl18/Rps24/Rps20/Rps7/Rpl35/Rps27/Rpl15/Rps10/Rpl35a/Rps19/Rps28                                                                                                                   |
| tags=67%, list=10%, signal=61%  | Tcf4/mt-Nd4/mt-Nd1/mt-Co1/mt-Co3/mt-Co2/mt-Nd5/mt-Nd6                                                                                                                                                 |
| tags=40%, list=2%, signal=40%   | Dnajb1/Hspa1a/Hspa1b/Dnaj1/Hsp90aa1/Hsp90ab1                                                                                                                                                          |
| tags=64%, list=4%, signal=62%   | mt-Cytb/mt-Nd1/mt-Co1/mt-Co3/mt-Co2/mt-Nd5/mt-Nd6                                                                                                                                                     |
| tags=70%, list=8%, signal=65%   | mt-Nd4/mt-Nd3/mt-Atp6/mt-Nd1/mt-Nd2/mt-Nd5/mt-Nd6                                                                                                                                                     |
| tags=70%, list=8%, signal=65%   | mt-Nd4/mt-Nd3/mt-Atp6/mt-Nd1/mt-Nd2/mt-Nd5/mt-Nd6                                                                                                                                                     |
| tags=62%, list=8%, signal=57%   | mt-Nd4/mt-Nd1/mt-Co1/mt-Co3/rst2/mt-Co2/mt-Nd5/mt-Nd6                                                                                                                                                 |
| tags=59%, list=21%, signal=48%  | Hivep2/Mecp2/Cux1/Med13/Tcf4/mt-Nd4/mt-Nd3/Kcnq5/Setd2/mt-Atp6/mt-Nd1/mt-Nd2/Satb1/mt-Nd5/Trappc9/mt-Nd6                                                                                              |
| tags=55%, list=20%, signal=45%  | Sars/Polr2a/Ndufv1/Zeb2/mt-Nd4/mt-Nd3/mt-Atp6/Pgap1/mt-Nd1/mt-Co1/mt-Co3/mt-Nd2/mt-Co2/mt-Nd5/Trappc9/mt-Nd6                                                                                          |
| tags=37%, list=8%, signal=35%   | mt-Nd4/mt-Nd3/mt-Atp6/mt-Cytb/mt-Nd1/mt-Co1/mt-Atp8/mt-Co3/mt-Nd2/rst2/mt-Co2/mt-Nd5/mt-Nd4/mt-Nd6                                                                                                    |
| tags=64%, list=8%, signal=59%   | mt-Nd4/mt-Nd1/mt-Co1/mt-Co3/mt-Co2/mt-Nd5/mt-Nd6                                                                                                                                                      |
| tags=93%, list=23%, signal=73%  | Rps17/Rpl31/Rps26/Rpl18/Rps24/Rps20/Rps7/Rpl35/Rps27/Rpl15/Rps10/Rpl35a/Rps19/Rps28                                                                                                                   |
| tags=39%, list=8%, signal=37%   | Chf2/mt-Nd4/mt-Atp6/mt-Cytb/mt-Nd1/mt-Co1/mt-Co3/mt-Nd2/mt-Co2/mt-Nd5/mt-Nd4/mt-Nd6                                                                                                                   |
| tags=70%, list=8%, signal=65%   | mt-Nd4/mt-Nd3/mt-Atp6/mt-Nd1/mt-Nd2/mt-Nd5/mt-Nd6                                                                                                                                                     |
| tags=44%, list=8%, signal=41%   | mt-Nd4/mt-Nd3/mt-Atp6/mt-Nd1/mt-Co1/mt-Atp8/mt-Co3/mt-Nd2/mt-Co2/mt-Nd5/mt-Nd6                                                                                                                        |
| tags=70%, list=8%, signal=65%   | mt-Nd4/mt-Nd3/mt-Atp6/mt-Nd1/mt-Nd2/mt-Nd5/mt-Nd6                                                                                                                                                     |
| tags=45%, list=8%, signal=43%   | mt-Nd4/Crebbp/mt-Nd3/mt-Atp6/Pgap1/mt-Nd1/mt-Nd2/mt-Nd5/Trappc9/mt-Nd6                                                                                                                                |
| tags=56%, list=13%, signal=50%  | Ctnnb1/Krt11/Ndufv1/Zeb2/Sptbn1/Kmt2e/mt-Nd4/Syk/mt-Nd3/mt-Atp6/mt-Cytb/mt-Nd1/mt-Co1/mt-Co3/mt-Nd2/mt-Co2/mt-Nd5/mt-Nd4                                                                              |
| tags=44%, list=11%, signal=40%  | Sptbn1/mt-Nd4/mt-Atp6/Sf3b1/Smchd1/mt-Cytb/mt-Nd1/mt-Co1/mt-Co3/mt-Nd2/mt-Co2/mt-Nd5/mt-Nd4/mt-Nd6                                                                                                    |
| tags=58%, list=8%, signal=54%   | mt-Nd4/mt-Nd1/mt-Co1/mt-Co3/mt-Co2/mt-Nd5/mt-Nd6                                                                                                                                                      |
| tags=21%, list=7%, signal=21%   | Dnajb1/Hspa1a/Jun/Hspa1b/Fos/Dnaj1/Hsp90aa1/Hsp90ab1/Rhob/Nfkbia/N4a1/Pmaip1/Chchd2/Myc/Gxp1/Hspd1/Actg1/Cited2/Egr1/Jund                                                                             |
| tags=73%, list=12%, signal=65%  | Rfc1/mt-Nd4/mt-Nd3/mt-Atp6/mt-Nd1/mt-Nd2/mt-Nd5/mt-Nd6                                                                                                                                                |
| tags=53%, list=11%, signal=48%  | Sptbn1/mt-Nd4/mt-Atp6/mt-Cytb/mt-Nd1/mt-Co3/mt-Nd2/mt-Nd5/mt-Nd4/mt-Nd6                                                                                                                               |
| tags=50%, list=8%, signal=47%   | mt-Nd4/mt-Nd3/mt-Cytb/mt-Nd1/mt-Co1/mt-Nd2/mt-Nd5/mt-Nd4/mt-Nd6                                                                                                                                       |
| tags=46%, list=12%, signal=42%  | Rfc1/Sptbn1/Ppp1r15b/mt-Nd4/mt-Atp6/mt-Cytb/mt-Nd1/mt-Co1/mt-Co3/mt-Nd2/mt-Nd5/mt-Nd4/mt-Nd6                                                                                                          |
| tags=57%, list=8%, signal=53%   | mt-Nd4/mt-Atp6/mt-Nd1/mt-Co1/mt-Co3/mt-Co2/mt-Nd5/mt-Nd6                                                                                                                                              |
| tags=88%, list=23%, signal=68%  | Rps17/Rpl31/Rps26/Rpl18/Rps24/Rps20/Rps7/Rpl35/Rps27/Rpl15/Rps10/Rpl35a/Rps19/Rps28                                                                                                                   |
| tags=88%, list=23%, signal=68%  | Rps17/Rpl31/Rps26/Rpl18/Rps24/Rps20/Rps7/Rpl35/Rps27/Rpl15/Rps10/Rpl35a/Rps19/Rps28                                                                                                                   |
| tags=71%, list=18%, signal=59%  | H2-Q7/Kras/mt-Nd4/mt-Cytb/mt-Nd1/mt-Co1/mt-Co3/mt-Co2/mt-Nd5/mt-Nd6                                                                                                                                   |
| tags=55%, list=12%, signal=49%  | Rfc1/mt-Nd4/mt-Nd3/mt-Atp6/mt-Nd1/mt-Co1/mt-Co3/mt-Nd2/mt-Co2/mt-Nd5/mt-Nd6                                                                                                                           |
| tags=80%, list=13%, signal=70%  | Kras/mt-Nd4/mt-Nd1/mt-Co1/mt-Co3/mt-Co2/mt-Nd5/mt-Nd6                                                                                                                                                 |
| tags=47%, list=21%, signal=39%  | Hivep2/Mecp2/Sars/Ndufv1/Fus/Cux1/Sptbn1/Ubtff/Tcf4/mt-Nd4/mt-Nd3/Kcnq5/mt-Atp6/mt-Cytb/Pgap1/mt-Nd1/mt-Co3/mt-Nd2/mt-Nd5/Trappc9/mt-Nd4/mt-Nd6                                                       |
| tags=14%, list=5%, signal=15%   | Hspa1a/Hspb1/Jun/Hspa1b/Atf3/Phd1a1/Fos/Ubb/Klf4/Dnaj1/Hsp90aa1/Hsp90ab1/Rhob/Id3/N4a1/Pmaip1/Myc/Gpx1/Hspd1/Trf4/Zfp36                                                                               |
| tags=93%, list=23%, signal=73%  | Rps17/Rpl31/Rps26/Rpl18/Rps24/Rps20/Rps7/Rpl35/Rps27/Rpl15/Rps10/Rpl35a/Rps19/Rps28                                                                                                                   |
| tags=93%, list=23%, signal=73%  | Rps17/Rpl31/Rps26/Rpl18/Rps24/Rps20/Rps7/Rpl35/Rps27/Rpl15/Rps10/Rpl35a/Rps19/Rps28                                                                                                                   |
| tags=35%, list=14%, signal=32%  | Camk2d/Tcrg1/Lrrc8c/Diaph1/mt-Nd4/Ano6/Ahnak/Mef2c/Kcnq5/mt-Atp6/mt-Cytb/Cab39/Atp2b1/mt-Co1/mt-Atp8/mt-Co3/mt-Co2/mt-Nd5/Pde4b/Wnk1                                                                  |
| tags=58%, list=8%, signal=54%   | mt-Nd4/mt-Nd1/mt-Co1/mt-Co3/mt-Co2/mt-Nd5/mt-Nd6                                                                                                                                                      |
| tags=37%, list=14%, signal=33%  | Camk2d/Tcrg1/Diaph1/mt-Nd4/Ano6/Ahnak/Mef2c/Kcnq5/mt-Atp6/mt-Cytb/Cab39/Atp2b1/mt-Co1/mt-Atp8/mt-Co3/mt-Co2/mt-Nd5/Pde4b/Wnk1                                                                         |
| tags=82%, list=18%, signal=68%  | Fus/Matr3/mt-Nd4/mt-Nd3/mt-Atp6/mt-Nd1/mt-Nd2/mt-Nd5/mt-Nd6                                                                                                                                           |
| tags=50%, list=21%, signal=41%  | Hivep2/Sars/Cux1/Zeb2/Sptbn1/Tcf4/mt-Nd4/Kcnq5/Setd2/Pgap1/mt-Nd1/mt-Co1/mt-Co3/mt-Co2/Satb1/mt-Nd5/Trappc9/mt-Nd6                                                                                    |
| tags=17%, list=8%, signal=18%   | Hspa1a/Hspb1/Jun/Hspa1b/Atf3/Ppp1r15a/Phd1a1/Ubb/Klf4/Dnaj1/Hsp90aa1/Hsp90ab1/Rhob/Id3/Nkbia/N4a1/Gapdh/Pmaip1/Myc/Gpx1/Hspd1/Trf4/Zfp36/Fam32a/Cited2/Egr1/Dynl1/Gadd45b/Dedd2/Chchd10/Sirt1         |
| tags=39%, list=8%, signal=37%   | mt-Nd4/Crebbp/mt-Nd3/mt-Atp6/mt-Nd1/mt-Co1/mt-Atp8/mt-Co3/mt-Nd2/mt-Co2/mt-Nd5/mt-Nd4/mt-Nd6                                                                                                          |
| tags=53%, list=11%, signal=48%  | Sptbn1/Ubtff/mt-Nd4/mt-Nd3/mt-Atp6/mt-Nd1/mt-Nd2/mt-Nd5/mt-Nd6/Wnk1                                                                                                                                   |
| tags=45%, list=8%, signal=43%   | mt-Nd4/mt-Nd3/mt-Atp6/mt-Nd1/mt-Co1/mt-Co3/mt-Nd2/mt-Co2/mt-Nd5/mt-Nd6                                                                                                                                |
| tags=45%, list=8%, signal=43%   | mt-Nd4/mt-Nd3/mt-Atp6/mt-Nd1/mt-Co1/mt-Co3/mt-Nd2/mt-Co2/mt-Nd5/mt-Nd6                                                                                                                                |
| tags=37%, list=14%, signal=33%  | Camk2d/Tcrg1/Diaph1/mt-Nd4/Ano6/Ahnak/Kcnq5/mt-Atp6/mt-Cytb/Cab39/Atp2b1/mt-Co1/mt-Atp8/mt-Co3/mt-Co2/mt-Nd5/Pde4b/Wnk1                                                                               |
| tags=45%, list=2%, signal=45%   | Dnajb1/Hspa1a/Hspa1b/Hsp90aa1/Hsp90ab1                                                                                                                                                                |
| tags=77%, list=18%, signal=64%  | Fus/Son/Kras/mt-Nd4/mt-Nd1/mt-Co1/mt-Co3/mt-Co2/mt-Nd5/mt-Nd6                                                                                                                                         |
| tags=37%, list=14%, signal=33%  | Malt1/Bcl6/Tcrg1/Foxp1/Sptbn1/Tcf4/Sh3kbp1/mt-Nd4/Syk/mt-Nd3/Bach2/mt-Atp6/mt-Cytb/Birc3/mt-Nd1/mt-Co1/mt-Co3/mt-Nd2/mt-Co2/mt-Nd5/Trappc9/mt-Nd6                                                     |
| tags=84%, list=26%, signal=64%  | Rps17/Rpl31/Rps26/Rpl18/Chchd10/Rps24/Rps20/Rps7/Rpl35/Rps27/Rpl15/Rps10/Rpl35a/Rps19/Rps28/Gars                                                                                                      |
| tags=50%, list=8%, signal=47%   | mt-Nd4/mt-Nd3/mt-Atp6/mt-Nd1/mt-Co1/mt-Co3/mt-Nd2/mt-Co2/mt-Nd5/mt-Nd6                                                                                                                                |
| tags=65%, list=15%, signal=59%  | Plekhn1/Dpm1/Pten/Prpf8/Smarce1/Bptf/Xytl1/Chd7/Ube3u/Jmjd1c/Ctcf/Tbce/Kat5a/Polg/Rere/Ube4b/Stat4/Minpp1/Celf2/Ctnnb1/Ndufv1/H2-Q7/Med13/Ankrd11/Son/Trcrg1/Kras/Zeb2/Rfc1/Diaph1/Kmt2e/Ddx6/mt-Nd4  |
| tags=60%, list=27%, signal=45%  | Zmynd11/Minpp1/Celf2/Tpp1/Hivep2/Mecp2/Ndufv1/Cux1/Tnrc6a/Atad1/Tcf4/mt-Nd4/Kcnq5/mt-Atp6/mt-Nd1/mt-Co1/mt-Co3/mt-Co2/Satb1/mt-Nd5/mt-Nd6                                                             |
| tags=54%, list=8%, signal=50%   | mt-Nd4/mt-Nd1/mt-Co1/mt-Co3/mt-Co2/mt-Nd5/mt-Nd6                                                                                                                                                      |
| tags=41%, list=10%, signal=38%  | Med13/Kras/Ubtff/Kmt2e/Ddx6/mt-Nd4/Herc1/Mef2c/mt-Atp6/Pgap1/mt-Nd1/mt-Co1/mt-Co3/mt-Co2/Satb1/mt-Nd5/Trappc9/mt-Nd6                                                                                  |
| tags=44%, list=8%, signal=44%   | Arcn1/Pik3r4/Atpvb0a1/Uvrag/Adam10/H13/Os9/Smx12/Bcl2/Ctnnb1/Rnf125/Sec24b/Ndufv1/H2-Q7/Birc2/Chchd3/Tcrg1/Lrrc8c/mt-Nd4/Ano6/Atpf1/kkbb1/Ahnak/Syk/mt-Nd3/Kcnq5/Sttb3/mt-Atp6/Vps37b/mt-Cytf/Igtaf/I |
| tags=56%, list=37%, signal=39%  | Xytl1/Chd7/Sik11/Jmjd1c/Rad21/Ctcf/Kmt2c/Tbce/Kat5a/Jak1/Polg/Rere/Ube4b/Stat1/Stat4/Zmynd11/Setx/Ep300/Daxx/vvns1abp/Celf2/Ctnnb1/Rnf115/Hivep2/Mecp2/Polr2a/fnfr1/H2-Q7/Fus/Usp7/Cux1/Nrkb2/Ankrd11 |
| tags=43%, list=8%, signal=41%   | mt-Nd4/mt-Nd3/mt-Atp6/mt-Nd1/mt-Co1/mt-Co3/mt-Nd2/mt-Co2/mt-Nd5/mt-Nd6                                                                                                                                |
| tags=50%, list=4%, signal=48%   | Hspa1a/Hspa8/Hspa1b/Hsp90aa1/Hspd1                                                                                                                                                                    |
| tags=58%, list=10%, signal=53%  | Hivep2/Mecp2/Cux1/Tcf4/mt-Nd4/mt-Nd3/Kcnq5/Setd2/mt-Atp6/mt-Nd1/mt-Nd2/Satb1/mt-Nd5/Trappc9/mt-Nd6                                                                                                    |
| tags=33%, list=4%, signal=33%   | Dnajb1/Hspa1a/Hspa1b/Phges3/Hspd1                                                                                                                                                                     |
| tags=67%, list=21%, signal=54%  | Hivep2/Mecp2/Cux1/Tcf4/mt-Nd4/Kcnq5/mt-Nd1/mt-Co1/mt-Co3/mt-Co2/mt-Nd5/mt-Nd6                                                                                                                         |
| tags=67%, list=21%, signal=54%  | Hivep2/Mecp2/Cux1/Tcf4/mt-Nd4/Kcnq5/mt-Nd1/mt-Co1/mt-Co3/mt-Co2/mt-Nd5/mt-Nd6                                                                                                                         |
| tags=82%, list=26%, signal=61%  | Rps17/Rpl31/Rps26/Rpl18/Rps24/Rps20/Rps7/Rpl35/Rps27/Rpl15/Rps10/Fip111/Rpl35a/Rps19/Rps28/Npm1/kd2/Arhgap31                                                                                          |
| tags=53%, list=8%, signal=49%   | mt-Nd4/mt-Atp6/mt-Cytb/mt-Nd1/mt-Co3/mt-Nd2/mt-Nd5/mt-Nd4/mt-Nd6                                                                                                                                      |
| tags=35%, list=8%, signal=33%   | mt-Nd4/mt-Nd3/mt-Atp6/mt-Cytb/mt-Nd1/mt-Co1/mt-Atp8/mt-Co3/mt-Nd2/mt-Co2/mt-Nd5/mt-Nd4/mt-Nd6                                                                                                         |
| tags=23%, list=4%, signal=23%   | Hspa1a/Hspb1/Jun/Hspa1b/Klf2/Fos/Rhob/Chchd2/Gpx1                                                                                                                                                     |
| tags=54%, list=8%, signal=50%   | mt-Nd4/mt-Nd3/mt-Nd1/mt-Nd2/mt-Nd5/mt-Nd4/mt-Nd6                                                                                                                                                      |
| tags=64%, list=36%, signal=43%  | Chd7/Ube3u/Jmjd1c/Ctcf/Tbce/Kat5a/Polg/Rere/Ube4b/Minpp1/Celf2/Ctnnb1/Ndufv1/H2-Q7/Son/Tcrg1/Kras/Zeb2/Rfc1/Diaph1/mt-Nd4/mt-Nd3/Sttb3/mt-Atp6/Aff4/mt-Cytb/mt-Nd1/mt-Co1/mt-Co3/mt-Nd2/mt-Co2/mt-N   |
| tags=27%, list=4%, signal=27%   | Hspa1a/Hspb1/Ubb/Dnaj1/Pmaip1/Myc/Gpx1                                                                                                                                                                |
| tags=42%, list=8%, signal=40%   | mt-Nd4/mt-Atp6/Smchd1/mt-Cytb/mt-Nd1/mt-Co1/mt-Co3/mt-Nd2/mt-Nd5/mt-Nd4/mt-Nd6                                                                                                                        |
| tags=100%, list=2%, signal=98%  | Hspa1a/Hspa1b/Nfkbia                                                                                                                                                                                  |
| tags=83%, list=4%, signal=80%   | Hspa1a/Hsp90aa1/Hsp90ab1/Phges3/Hspd1                                                                                                                                                                 |
| tags=54%, list=8%, signal=50%   | mt-Nd4/mt-Nd3/mt-Atp6/mt-Nd1/mt-Nd2/mt-Nd5/mt-Nd6                                                                                                                                                     |
| tags=19%, list=4%, signal=19%   | Hspa1a/Hspb1/Hspa1b/Atf3/Ubb/Dnaj1/Pmaip1/Myc/Gpx1                                                                                                                                                    |
| tags=65%, list=19%, signal=53%  | Carx1d/H2-Q7/Kras/mt-Nd4/mt-Cytb/mt-Nd1/mt-Co1/mt-Co3/mt-Co2/mt-Nd5/mt-Nd6                                                                                                                            |
| tags=35%, list=8%, signal=33%   | mt-Nd4/mt-Nd3/mt-Atp6/mt-Cytb/mt-Nd1/mt-Co1/mt-Co3/mt-Nd2/mt-Co2/mt-Nd5/mt-Nd6/Wnk1                                                                                                                   |
| tags=42%, list=10%, signal=38%  | Tcf4/Ganab/mt-Cytb/mt-Nd1/mt-Co1/mt-Co3/mt-Co2/mt-Nd5/mt-Nd6/Wnk1                                                                                                                                     |
| tags=83%, list=4%, signal=81%   | Klf4/Hsp90aa1/Hsp90ab1/Myc/Phges3                                                                                                                                                                     |
| tags=83%, list=4%, signal=81%   | Klf4/Hsp90aa1/Hsp90ab1/Myc/Phges3                                                                                                                                                                     |
| tags=21%, list=4%, signal=20%   | Hspa1a/Hspb1/Ppp1r15a/Ubb/Dnaj1/Pmaip1/Myc/Gpx1                                                                                                                                                       |
| tags=65%, list=21%, signal=52%  | Ctnnb1/Krt11/Tcrg1/Kras/mt-Nd4/mt-Nd1/mt-Co1/mt-Co3/mt-Co2/mt-Nd5/mt-Nd6                                                                                                                              |
| tags=100%, list=1%, signal=100% | Hspa1a/Hspa1b                                                                                                                                                                                         |
| tags=100%, list=1%, signal=93%  | Jun/Fos/Junb/Jund                                                                                                                                                                                     |
| tags=59%, list=37%, signal=40%  | Smarce1/Bptf/Chd7/Jmjd1c/Rad21/Ctcf/Ppp2ca/Kmt2c/Kat5a/Chd8/Rere/Phf21a/Ube4b/Zmynd11/Ep300/Celf2/Ctnnb1/Chd1/Hivep2/Mecp2/Sars/Polr2a/Ndufv1/Usp7/Cux1/Med13/Ankrd11/Son/Foxp1/Tcf2/Sptbn1/Ubtff     |
| tags=48%, list=22%, signal=39%  | Coro22/Ctnnb1/Rnf125/Mecp2/Ndufv1/Cep83/Usp7/Tcrg1/Kras/Sptbn1/mt-Nd4/Herc1/mt-Nd3/mt-Atp6/mt-Cytb/mt-Nd1/mt-Co1/mt-Co3/mt-Nd2/mt-Co2/mt-Nd5/mt-Nd6                                                   |
| tags=50%, list=8%, signal=47%   | mt-Nd4/mt-Nd3/mt-Nd1/mt-Nd2/mt-Nd5/mt-Nd4/mt-Nd6                                                                                                                                                      |
| tags=37%, list=21%, signal=32%  | Chd1/Hivep2/Mecp2/Sars/Ndufv1/Fus/Cux1/Zhye27/Tnrc6a/Tcrg1/Foxp1/Fbxo38/Zeb2/Rfc1/Atad1/Sptbn1/Ubtff/Ppp1r15b/Tcf4/Ddx6/mt-Nd4/Crebbp/mt-Nd3/Mef2c/Kcnq5/Setd2/mt-Atp6/mt-Cytb/Pgap1/mt-Nd1/mt-Co     |
| tags=41%, list=10%, signal=38%  | Tcf4/mt-Nd4/mt-Atp6/mt-Cytb/mt-Nd1/mt-Co1/mt-Co3/mt-Nd2/mt-Nd5/mt-Nd4/mt-Nd6                                                                                                                          |
| tags=50%, list=21%, signal=41%  | Hivep2/Sars/Cux1/Son/Diaph1/Tcf4/Kcnq5/mt-Cytb/Ralgapa1/Pgap1/mt-Nd1/mt-Co1/mt-Co3/mt-Co2/mt-Nd5/Trappc9/mt-Nd6                                                                                       |
| tags=60%, list=18%, signal=50%  | H2-Q7/Tcrg1/Foxp1/Kras/mt-Nd4/Aff4/mt-Nd1/mt-Co1/mt-Co3/mt-Co2/mt-Nd5/mt-Nd6                                                                                                                          |
| tags=67%, list=5%, signal=64%   | Hspa1a/Hspa8/Hspa1b/Actg1                                                                                                                                                                             |
| tags=59%, list=41%, signal=38%  | Dpm1/Pten/Pex7/Taf15/Apoe/Copb2/Smarce1/Slc12a6/Chd7/Nacc1/Cnot1/Ctcf/Tbce/Polg/Ranbp2/Rere/Tufm/Ube4b/Stat4/Zmynd11/Setx/Minpp1/Celf2/Tpp1/Ctnnb1/Hivep2/Mecp2/Sars/Ndufv1/H2-Q7/Fus/Cux1/Zhye2      |
| tags=62%, list=18%, signal=52%  | H2-Q7/Kras/Tcf4/mt-Nd4/mt-Nd1/mt-Co1/mt-Co3/mt-Co2/mt-Nd5/mt-Nd6                                                                                                                                      |
| tags=57%, list=19%, signal=47%  | Ndufv1/H2-Q7/Kras/mt-Nd4/mt-Nd3/mt-Atp6/mt-Nd1/mt-Co1/mt-Co3/mt-Nd2/mt-Co2/mt-Nd5/mt-Nd6                                                                                                              |
| tags=84%, list=26%, signal=63%  | Rps17/Rpl31/Rps26/Rpl18/Rps24/Rps20/Rps7/Rpl35/Rps27/Rpl15/Rps10/Rpl35a/Rps19/Rps28/Btin1/Tmco1                                                                                                       |
| tags=56%, list=38%, signal=38%  | Copb2/Smarce1/Bptf/Sic12a6/Ube3b/Cnot1/Ctcf/Ppp2ca/Kmt2c/Tbce/Nrro6/Rere/Ube4b/Exosc1/Zmynd11/Ep300/Minpp1/Celf2/Ctnnb1/Hivep2/Sars/Polr2a/Usp7/Cux1/Med13/Ankrd11/Son/Kras/Zeb2/Diaph1/Ubtff/Pp      |
| tags=50%, list=8%, signal=47%   | Tcrg1/mt-Nd4/mt-Atp6/mt-Cytb/mt-Nd1/mt-Atp8/mt-Co3/mt-Nd2/mt-Nd5/mt-Nd4/mt-Nd6                                                                                                                        |
| tags=53%, list=8%, signal=50%   | mt-Nd4/mt-Cytb/mt-Nd1/mt-Co1/mt-Co3/mt-Co2/mt-Nd5/mt-Nd6                                                                                                                                              |
| tags=67%, list=21%, signal=53%  | Ctnnb1/Mecp2/Krt11/H2-Q7/Kras/mt-Nd4/Crebbp/mt-Atp6/mt-Cytb/Smad7/mt-Nd1/mt-Co3/mt-Nd2/mt-Nd5/mt-Nd4/mt-Nd6                                                                                           |
| tags=24%, list=4%, signal=23%   | Hspa1a/Jun/Hspa8/Hspa1b/Hsp90ab1/Gapdh/Gpx1/Hspd1                                                                                                                                                     |
| tags=28%, list=9%, signal=27%   | Jun/Atf3/Phd1a1/Fos/Ubb/Dnaj1/Rhob/Id3/N4a1/Pmaip1/Myc/Hspd1/Egr1/Gadd45b/Dedd2/Sirt1/Sap18                                                                                                           |
| tags=36%, list=15%, signal=32%  | Ankrd11/Foxp1/Kras/Zeb2/Atad1/Sptbn1/Ubtff/mt-Nd4/Crebbp/Pgap1/mt-Nd1/mt-Co1/mt-Co3/mt-Co2/Satb1/mt-Nd5/Trappc9/Nsf/mt-Nd6                                                                            |
| tags=54%, list=8%, signal=50%   | mt-Nd4/mt-Nd3/mt-Atp6/mt-Nd1/mt-Nd2/mt-Nd5/mt-Nd6                                                                                                                                                     |
| tags=56%, list=13%, signal=49%  | Kras/mt-Nd4/Smchd1/mt-Nd1/mt-Co1/mt-Co3/mt-Co2/mt-Nd5/mt-Nd6                                                                                                                                          |
| tags=47%, list=21%, signal=39%  | Hivep2/Mecp2/Usp7/Med13/Malt1/Foxp1/Kras/Zeb2/Sptbn1/Tcf4/mt-Nd4/Crebbp/Setd2/Aff4/Birc3/mt-Nd1/mt-Co1/mt-Co3/mt-Co2/Satb1/mt-Nd5/mt-Nd6                                                              |
| tags=32%, list=4%, signal=31%   | Hspa1a/Hspa1b/Hsp90aa1/Hsp90ab1/Hf30/Gapdh/Phges3/Hspd1                                                                                                                                               |
| tags=75%, list=2%, signal=74%   | mt-Co1/mt-Co3/mt-Co2                                                                                                                                                                                  |
| tags=80%, list=6%, signal=75%   | Dnajb1/Hspa1a/Jun/Cited2                                                                                                                                                                              |
| tags=15%, list=4%, signal=16%   | Dnajb1/Hspa1a/Hspb1/Ppp1r15a/Klf4/Dnaj1/Dusp1/Pmaip1/Chchd2/Myc/Gpx1/Trf4                                                                                                                             |
| tags=82%, list=23%, signal=64%  | Rps17/Rpl31/Rps26/Rpl18/Rps24/Rps20/Rps7/Rpl35/Rps27/Rpl15/Rps10/Rpl35a/Rps19/Rps28                                                                                                                   |
| tags=56%, list=21%, signal=45%  | Hivep2/Mecp2/Cux1/Tcf4/mt-Nd4/mt-Nd3/Kcnq5/Setd2/mt-Atp6/mt-Nd1/mt-Nd2/mt-Nd5/Trappc9/mt-Nd6                                                                                                          |
| tags=100%, list=12%, signal=89% | Ano6/Mef2c/Atp2b1                                                                                                                                                                                     |
| tags=29%, list=11%, signal=27%  | Hspa1a/Hspb1/Jun/Fos/Klf4/Hsp90ab1/N4a1/Myc/Zfp36/Cited2/Egr1/Sirt1/Ube2d1/Rap1a/rf2                                                                                                                  |

|                                 |                                                                                                                                                                                                                                                                                                                |
|---------------------------------|----------------------------------------------------------------------------------------------------------------------------------------------------------------------------------------------------------------------------------------------------------------------------------------------------------------|
| tags=24%, list=4%, signal=24%   | Hspa1a/Hspa8/Hspa1b/Atf3/Ppp1r15a/Hspd1                                                                                                                                                                                                                                                                        |
| tags=15%, list=4%, signal=15%   | Hspa1a/Hspb1/Hspa1b/Atf3/Ppp1r15a/Ubb/Dnaj1/Pmaip1/Myc/Gpx1                                                                                                                                                                                                                                                    |
| tags=63%, list=28%, signal=47%  | Stat1/Stat4/Rnf213/Sh2b3/Ctnnb1/Rnf125/H2-Q7/Son/Tcig1/Foxp1/Kras/mt-Nd4/Atf4/mt-Nd1/mt-Co1/mt-Co3/mt-Co2/mt-Nd5/mt-Nd6                                                                                                                                                                                        |
| tags=37%, list=19%, signal=32%  | Ndufv1/Slc25a51/Atp2c1/Tcig1/Lrrcc8/Atad1/mt-Nd4/Ano6/mt-Nd3/Kcnq5/mt-Atp6/mt-Cytb/Atp2b1/mt-Nd1/mt-Co1/mt-Atp6/mt-Co3/mt-Nd2/mt-Co2/mt-Nd5/mt-Nd4/mt-Nd6                                                                                                                                                      |
| tags=61%, list=41%, signal=39%  | Dpm1/Pten/Pex7/Dnm2/PprB/Apoe/Flii/Bptf/Slc12a6/Xytl1/Chd7/Ube3b/Jmjd1c/Ctcf/Polg/Rere/Tmem127/Stat4/Ep300/lvns1abp/Celf2/Tpp1/Ctnnb1/Krt11/Ndufv1/Cep83/H2-Q7/Med13/Kras/Zeb2/Sptbn1/Kmt2e/Ddx6/mt-Foxp1/Kras/Ppp1r15b/Tc4/mt-Nd4/mt-Nd3/mt-Atp6/mt-Cytb/mt-Nd1/mt-Co1/mt-Co3/mt-Nd2/It2/mt-Co2/mt-Nd5/mt-Nd6 |
| tags=53%, list=38%, signal=37%  | Copb2/Smarce1/Flii/Bptf/Slc12a6/Ube3b/Nacc1/Cnot1/Ctcf/Ppp2ca/Kmt2c/Tbce/Nros/Polg/Ranbp2/Rere/Ube4b/Exosc1/Zmynd11/Ep300/Mnpp1/Celf2/Ctnnb1/Hvep2/Sars/Polr2a/Ndufv1/Usp7/Cux1/Med13/Ankrd11/So                                                                                                               |
| tags=30%, list=10%, signal=28%  | Arnt/mt-Nd4/mt-Nd3/mt-Atp6/mt-Cytb/mt-Nd1/mt-Co1/mt-Atp6/mt-Co3/mt-Nd2/It2/mt-Co2/mt-Nd5/mt-Nd4/mt-Nd6                                                                                                                                                                                                         |
| tags=44%, list=20%, signal=36%  | Mecp2/Krt11/Fus/Bms1/Tcig1/Fbxo38/Kras/Rfcl1/Matr3/Sptbn1/Ubtfl/Ctl2/mt-Nd4/mt-Nd3/mt-Atp6/Smchd1/mt-Nd1/mt-Co1/mt-Co3/mt-Nd2/mt-Co2/mt-Nd5/mt-Nd6/Wnk1                                                                                                                                                        |
| tags=54%, list=8%, signal=50%   | mt-Nd4/mt-Nd1/mt-Co1/mt-Co3/mt-Co2/mt-Nd5/mt-Nd6                                                                                                                                                                                                                                                               |
| tags=62%, list=6%, signal=59%   | Jun/Fos/Klf4/Myc/Egr1                                                                                                                                                                                                                                                                                          |
| tags=58%, list=27%, signal=43%  | Zmynd11/Wip2/Celf2/Hvep2/Sars/Cux1/Kras/Tc4/mt-Nd4/mt-Nd3/Kcnq5/mt-Atp6/Pgap1/mt-Nd1/mt-Nd2/mt-Nd5/Trappc9/mt-Nd6                                                                                                                                                                                              |
| tags=24%, list=4%, signal=24%   | Hspa1a/Hspa8/Hspa1b/Hsp90aa1/Hsp90ab1/M30/Gapdh/Ptges3/Hspd1                                                                                                                                                                                                                                                   |
| tags=75%, list=1%, signal=75%   | Dnaq1/Hspa1a/Hspa1b                                                                                                                                                                                                                                                                                            |
| tags=75%, list=1%, signal=75%   | Dnaq1/Hspa1a/Hspa1b                                                                                                                                                                                                                                                                                            |
| tags=75%, list=1%, signal=75%   | Dnaq1/Hspa1a/Hspa1b                                                                                                                                                                                                                                                                                            |
| tags=36%, list=14%, signal=32%  | Foxp1/Kras/Ppp1r15b/Tc4/mt-Nd4/Herc1/mt-Nd3/Setd2/mt-Atp6/Atf4/mt-Cytb/mt-Nd1/mt-Co1/mt-Co3/mt-Nd2/It2/mt-Co2/mt-Nd5/mt-Nd6                                                                                                                                                                                    |
| tags=65%, list=23%, signal=51%  | Rnf213/Sh2b3/Mecp2/Son/Kras/mt-Nd4/mt-Cytb/mt-Nd1/mt-Co1/mt-Co3/mt-Co2/mt-Nd5/mt-Nd6                                                                                                                                                                                                                           |
| tags=21%, list=6%, signal=21%   | Hspa1a/Hspe1/Hspa8/Hspa1b/Raad1/Hsp90aa1/Hsp90ab1/Tubb5/Rhob/Tuba1a/Hsp41/Rad/Raf1/HspH1                                                                                                                                                                                                                       |
| tags=42%, list=8%, signal=39%   | mt-Nd4/Ganab/mt-Nd1/mt-Co1/mt-Co3/mt-Co2/mt-Nd5/mt-Nd6                                                                                                                                                                                                                                                         |
| tags=46%, list=26%, signal=36%  | Setx/Daxx/Hps3/Pml/Rnf213/Sh2b3/Ctnnb1/Krt1/Atp2c1/H2-Q7/NfkB1/RfkB2/Tcig1/Kras/Ppp1r15b/Tc4/mt-Nd4/Syk/mt-Atp6/mt-Cytb/mt-Nd1/mt-Co1/mt-Co3/mt-Nd2/mt-Co2/mt-Nd5/mt-Nd4/mt-Nd6/Adng6                                                                                                                          |
| tags=38%, list=3%, signal=38%   | Hspb1/Hspa8/Ubb/Tubb5/Tuba1a                                                                                                                                                                                                                                                                                   |
| tags=100%, list=4%, signal=97%  | Hsp90aa1/Hsp90ab1/Ptges3                                                                                                                                                                                                                                                                                       |
| tags=45%, list=12%, signal=41%  | Matr3/mt-Nd4/mt-Atp6/mt-Cytb/mt-Nd1/mt-Co1/mt-Co3/mt-Co2/mt-Nd5/mt-Nd6                                                                                                                                                                                                                                         |
| tags=50%, list=21%, signal=41%  | Hvep2/Mecp2/Sars/Fus/Cux1/Ubtfl/Tc4/mt-Nd4/mt-Nd3/Kcnq5/mt-Atp6/Pgap1/mt-Nd1/mt-Nd2/mt-Nd5/Trappc9/mt-Nd6                                                                                                                                                                                                      |
| tags=46%, list=20%, signal=38%  | Mecp2/Sars/H2-Q7/Fus/Kras/Matr3/Sptbn1/Tc4/mt-Nd4/Pgap1/mt-Nd1/mt-Co1/mt-Co3/mt-Co2/mt-Nd5/Trappc9/mt-Nd6                                                                                                                                                                                                      |
| tags=53%, list=10%, signal=49%  | Tc4/mt-Nd4/mt-Nd1/mt-Co1/mt-Co3/mt-Co2/mt-Nd5/mt-Nd6                                                                                                                                                                                                                                                           |
| tags=39%, list=8%, signal=37%   | mt-Nd4/Crebbp/mt-Nd3/Stt3b/mt-Atp6/mt-Nd1/mt-Nd2/mt-Nd5/mt-Nd6                                                                                                                                                                                                                                                 |
| tags=56%, list=8%, signal=52%   | mt-Nd4/mt-Nd1/mt-Nd2/mt-Nd5/mt-Nd6                                                                                                                                                                                                                                                                             |
| tags=44%, list=8%, signal=41%   | mt-Nd4/mt-Nd1/mt-Co1/mt-Co3/mt-Co2/mt-Nd5/mt-Nd6                                                                                                                                                                                                                                                               |
| tags=82%, list=8%, signal=77%   | Pten/Pex7/Smarce1/Slc12a6/Rere/Ube4b/Stat4/H2-Q7/Kras/mt-Nd4/mt-Cytb/mt-Nd1/mt-Co1/mt-Atp6/mt-Co3/mt-Co2/mt-Nd5/mt-Nd6                                                                                                                                                                                         |
| tags=42%, list=21%, signal=35%  | Ctnnb1/Hvep2/Sars/Polr2a/Usp7/Cux1/Ankrd11/Son/Zeb2/Diaph1/Ubtfl/Ppp1r15b/Tc4/Ddx6/mt-Nd4/Mef2c/Kcnq5/Ralgapa1/Pgap1/mt-Nd1/mt-Co1/mt-Co3/mt-Co2/mt-Nd5/Trappc9/Macf1/mt-Nd6                                                                                                                                   |
| tags=67%, list=4%, signal=64%   | mt-Cytb/mt-Co1/mt-Co3/mt-Co2                                                                                                                                                                                                                                                                                   |
| tags=33%, list=5%, signal=32%   | Hspa1a/Hspa8/Hspa1b/Hsp90aa1/Hsp90ab1/Fth1                                                                                                                                                                                                                                                                     |
| tags=40%, list=19%, signal=56%  | Hspa1a/Hspb1/Hspa8/Hspa1b/Rhob/Carp1/Actg1/Rplp2/Rps17/Rps45/Rps8/Rpl31/Rpl18/Map2k1/Rps4x/Rpl19/Rala/Rpl8/Rps7/Bag/Rp38/Rp30/Bcar3/Rpl7a/Rps16/Rps2/Rps13/Rpl13a                                                                                                                                              |
| tags=57%, list=2%, signal=56%   | Hspa1a/Hsp90aa1/Hsp90ab1/Gapdh                                                                                                                                                                                                                                                                                 |
| tags=65%, list=38%, signal=42%  | Apoe/Smrce1/Flii/Chd7/Jmjd1c/Ubr1/Jak1/Polg/Rere/Phf21a/Ube4b/Stat1/EiF2ak3/Mnpp1/Ctnnb1/Malt1/Foxp1/Kras/Ppp1r15b/Tc4/mt-Nd4/Setd2/Atf4/Birc3/mt-Nd1/mt-Co1/mt-Co3/mt-Co2/mt-Nd5/Trappc9/mt-Nd6                                                                                                               |
| tags=63%, list=30%, signal=46%  | Rere/Avnc1/Ep300/Ctnnb1/Rnf125/Mecp2/Ndufv1/Usp7/Tcig1/Tc4/mt-Nd4/Crebbp/mt-Nd3/mt-Atp6/Atf4/mt-Nd1/mt-Nd2/mt-Nd5/mt-Nd6                                                                                                                                                                                       |
| tags=22%, list=4%, signal=22%   | Hspa1a/Hspa8/Hspa1b/Atf3/Ppp1r15a/Hspd1                                                                                                                                                                                                                                                                        |
| tags=100%, list=2%, signal=98%  | Nsf                                                                                                                                                                                                                                                                                                            |
| tags=100%, list=2%, signal=98%  | Nsf                                                                                                                                                                                                                                                                                                            |
| tags=40%, list=23%, signal=33%  | Ilf4a/Tpp1/Mecp2/Ndufv1/Ifngr1/Fus/NfkB1/NfkB2/Son/Kras/Zeb2/Tc4/Sh3bp1/mt-Nd4/Ikbk/Syk/mt-Nd3/Bach2/mt-Atp6/mt-Cytb/mt-Nd1/mt-Co1/mt-Co3/mt-Nd2/mt-Co2/mt-Nd5/mt-Nd4/mt-Nd6                                                                                                                                   |
| tags=46%, list=31%, signal=35%  | Nros/Polg/Rere/Ube4b/Exosc1/Zmynd11/Wip2/Setx/Celf2/Tpp1/Rnf125/Hvep2/Mecp2/Sars/Ndufv1/Fus/Cux1/Med13/Son/Kras/Atad1/Matr3/Sptbn1/Ubtfl/Tc4/Kmt2e/Ddx6/mt-Nd4/Herc1/Mef2c/Kcnq5/Setd2/mt-Atp6/R                                                                                                               |
| tags=13%, list=5%, signal=14%   | Dnaq1/Hspa1a/Hspb1/Ppp1r15a/Klf4/Dnaj1/Hsp90aa1/Hsp90ab1/NfkBia/Dusp1/Pmaip1/Chchd2/Myc/Gpx1/Traf4/Zfp36/Actg1                                                                                                                                                                                                 |
| tags=33%, list=1%, signal=33%   | Hspa1a/Hspa8/Hspa1b                                                                                                                                                                                                                                                                                            |
| tags=100%, list=19%, signal=81% | BoB/Spag9/Ctcf12/Tc4/Mef2c                                                                                                                                                                                                                                                                                     |
| tags=27%, list=11%, signal=26%  | Cd84/Diaph1/mt-Nd4/Ano6/Ahnak/Syk/Mef2c/Kcnq5/mt-Atp6/mt-Cytb/Cab39/Atp2b1/mt-Co1/mt-Atp6/mt-Co3/mt-Co2/mt-Nd5/Nsf/Pde4b/Wnk1                                                                                                                                                                                  |
| tags=41%, list=18%, signal=35%  | Ifngr1/H2-Q7/Usp7/Son/Tcig1/Kras/mt-Nd4/Ikbk/Syk/Bach2/Il10ra/mt-Nd1/mt-Co1/mt-Co3/mt-Co2/mt-Nd5/mt-Nd6                                                                                                                                                                                                        |
| tags=67%, list=4%, signal=64%   | Hspa8/Hsp90aa1/Hsp90ab1/Ms4a1                                                                                                                                                                                                                                                                                  |
| tags=67%, list=4%, signal=64%   | Hspa8/Hsp90aa1/Hsp90ab1/Ms4a1                                                                                                                                                                                                                                                                                  |
| tags=68%, list=38%, signal=44%  | Apoe/Smrce1/Flii/Chd7/Jmjd1c/Ubr1/Jak1/Polg/Rere/Phf21a/Ube4b/Stat1/EiF2ak3/Ctnnb1/Foxp1/Ppp1r15b/mt-Nd4/Setd2/Atf4/mt-Nd1/mt-Co1/mt-Co3/mt-Co2/mt-Nd5/Trappc9/mt-Nd6                                                                                                                                          |
| tags=44%, list=8%, signal=41%   | mt-Nd4/mt-Nd1/mt-Co1/mt-Co3/mt-Co2/mt-Nd5/mt-Nd6                                                                                                                                                                                                                                                               |
| tags=58%, list=38%, signal=39%  | Apoe/Flii/Chd7/Jmjd1c/Rad21/Ctcf/Kmt2c/Kat5a/Polg/Rere/Ube4b/Zmynd11/Setx/Ep300/lvns1abp/Celf2/Rnf125/Hvep2/Mecp2/Polr2a/H2-Q7/Fus/Usp7/Cux1/Ankrd11/Son/Zeb2/Atad1/Matr3/Ubtfl/Tc4/mt-Nd4/Crebbp/mt                                                                                                           |
| tags=67%, list=2%, signal=66%   | Klf2/Klf4/Hsp90aa1/Hsp90ab1                                                                                                                                                                                                                                                                                    |
| tags=18%, list=8%, signal=18%   | Hspa1a/Jun/Hspa8/Hspa1b/Ppp1r15a/Sertad1/Klf4/Hsp90ab1/Rhob/d3/Nr4a1/Dusp1/Myc/Junb/Cited2/Jund/Gadd45b/Senp6/Sirt1                                                                                                                                                                                            |
| tags=71%, list=25%, signal=54%  | Ep300/Mecp2/Ndufv1/Sptbn1/Crebbp/Herc1/mt-Nd3/Mef2c/mt-Nd1/mt-Nd2                                                                                                                                                                                                                                              |
| tags=16%, list=3%, signal=17%   | Hspa1a/Hspb1/Hspa8/Hspa1b/Ubb/Tubb5/Gapdh/Tuba1a                                                                                                                                                                                                                                                               |
| tags=65%, list=36%, signal=43%  | Nacc1/Ctcf/Tbce/Polg/Ranbp2/Tufm/Stat4/Celf2/Tpp1/Ctnnb1/Mecp2/Ndufv1/H2-Q7/Son/Tcig1/Kras/Sptbn1/Ubtfl/mt-Nd4/mt-Nd3/mt-Atp6/mt-Nd1/mt-Nd2/Satb1/mt-Nd5/mt-Nd6                                                                                                                                                |
| tags=74%, list=23%, signal=58%  | Rps17/Rpl31/Rps26/Rpl18/Rps24/Rps20/Rps7/Rpl35/Rps27/Rpl15/Rps10/Rpl35a/Rps19/Rps28                                                                                                                                                                                                                            |
| tags=39%, list=12%, signal=35%  | Matr3/Ubtfl/mt-Nd4/Crebbp/mt-Atp6/mt-Cytb/mt-Nd1/mt-Co1/mt-Co3/mt-Co2/mt-Nd5/mt-Nd6                                                                                                                                                                                                                            |
| tags=53%, list=4%, signal=52%   | Sptbn1/mt-Cytb/mt-Nd1/mt-Co1/mt-Co3/mt-Co2/mt-Nd5/mt-Nd6                                                                                                                                                                                                                                                       |
| tags=29%, list=8%, signal=28%   | mt-Nd4/mt-Nd3/Kdm5a/mt-Cytb/mt-Nd1/mt-Co1/mt-Co3/mt-Nd2/mt-Co2/mt-Nd5/mt-Nd4/Kdm6b/mt-Nd6                                                                                                                                                                                                                      |
| tags=100%, list=8%, signal=93%  | Mef2c/Atp2b1                                                                                                                                                                                                                                                                                                   |
| tags=100%, list=8%, signal=93%  | Mef2c/Atp2b1                                                                                                                                                                                                                                                                                                   |
| tags=50%, list=4%, signal=49%   | Klf4/Hsp90aa1/Hsp90ab1/Myc/Ptges3                                                                                                                                                                                                                                                                              |
| tags=21%, list=9%, signal=21%   | Hspa1a/Hspe1/Hspa8/Hspa1b/Ppp1r15a/Ubb/Dnaj1/Hsp90aa1/Hsp90ab1/Nr4a1/Pmaip1/Chchd2/Tomm6/Myc/Mrps6/Gpx1/Mrpl52/Timm8b/Hspd1/Mrps12/P4ha1/Ubc/Ech1/Dynl1/NoI7/Chchd10/Sirt1/Uba52/Fkbp4/Map2k1                                                                                                                  |
| tags=27%, list=1%, signal=27%   | Hspa1a/Hspa8/Hspa1b/Dnaj1                                                                                                                                                                                                                                                                                      |
| tags=100%, list=2%, signal=98%  | Hsp90aa1/Hsp90ab1                                                                                                                                                                                                                                                                                              |
| tags=100%, list=2%, signal=98%  | Hsp90aa1/Hsp90ab1                                                                                                                                                                                                                                                                                              |
| tags=100%, list=2%, signal=98%  | Dnaq1/Hsp90ab1                                                                                                                                                                                                                                                                                                 |
| tags=100%, list=2%, signal=98%  | Hsp90aa1/Hsp90ab1                                                                                                                                                                                                                                                                                              |
| tags=100%, list=2%, signal=98%  | Hsp90aa1/Hsp90ab1                                                                                                                                                                                                                                                                                              |
| tags=65%, list=39%, signal=41%  | Taf15/Flii/Bptf/Chd7/Jmjd1c/Rad21/Phip/Polg/Chd8/Phf21a/Tmem127/Ep300/Rnf125/Hvep2/Mecp2/Fus/Med13/Foxp1/Kras/Matr3/Sptbn1/Kmt2e/Ddx6/mt-Nd4/Crebbp/Setd2/mt-Nd1/mt-Co1/mt-Co3/mt-Co2/Satb1/mt-N                                                                                                               |
| tags=62%, list=22%, signal=50%  | Polg/Tmem127/Stat4/Sh2b3/Ctnnb1/Cank1d/Krt11/H2-Q7/Kras/mt-Nd4/mt-Atp6/mt-Cytb/Cab39/Atp2b1/mt-Co1/mt-Atp6/mt-Co3/mt-Co2/mt-Nd5/Nsf/Pde4b/Wnk1                                                                                                                                                                 |
| tags=16%, list=4%, signal=17%   | Hspa1a/Hspe1/Hspa1b/Ubb/Klf4/Hsp90ab1/Nr4a1/Gapdh/Pmaip1/Myc/Gpx1/Hspd1                                                                                                                                                                                                                                        |
| tags=21%, list=7%, signal=20%   | Hspa1a/Hspa8/Hspa1b/Klf2/Fos/Hsp90ab1/d3/NfkBia/Pmaip1/Myc/Gpx1/Ptges3/Zfp36/Ly6d/Egr1/Jund                                                                                                                                                                                                                    |
| tags=56%, list=4%, signal=54%   | Klf4/Hsp90aa1/Hsp90ab1/Myc/Ptges3                                                                                                                                                                                                                                                                              |
| tags=44%, list=11%, signal=40%  | Sptbn1/Tc4/S3b1/Atf4/mt-Cytb/mt-Nd1/mt-Co1/mt-Co3/mt-Co2/mt-Nd5/mt-Nd6                                                                                                                                                                                                                                         |
| tags=39%, list=8%, signal=37%   | mt-Nd4/Crebbp/Setd2/mt-Nd1/mt-Co1/mt-Co3/mt-Co2/mt-Nd5/mt-Nd6                                                                                                                                                                                                                                                  |
| tags=100%, list=2%, signal=98%  | Gpr171                                                                                                                                                                                                                                                                                                         |
| tags=100%, list=2%, signal=98%  | Gpr171                                                                                                                                                                                                                                                                                                         |
| tags=18%, list=6%, signal=19%   | Jun/Atf3/Klf2/Fos/Ubb/Klf4/Tubb5/Rhob/d3/Nr4a1/Dusp1/Klf10/Myc/Gpx1/Carp1/Zfp36/Actg1/Junb/Hnmpab/Cited2/Egr1                                                                                                                                                                                                  |
| tags=15%, list=7%, signal=16%   | Hspa1a/Hspb1/Hspa8/Hspa1b/Atf3/Ppp1r15a/Klf4/Hsp90aa1/d3/Gapdh/Myc/Dazap1/Hspd1/Zfp36/Actg1/Hnmpab/Cited2/Egr1/Gpsm3                                                                                                                                                                                           |
| tags=52%, list=21%, signal=42%  | Ctnnb1/Krt11/Tcig1/Kras/mt-Nd4/mt-Nd1/mt-Co1/mt-Co3/mt-Co2/mt-Nd5/mt-Nd6                                                                                                                                                                                                                                       |
| tags=50%, list=2%, signal=49%   | Klf2/Klf4/Hsp90aa1/Hsp90ab1                                                                                                                                                                                                                                                                                    |
| tags=50%, list=2%, signal=49%   | Klf2/Klf4/Hsp90aa1/Hsp90ab1                                                                                                                                                                                                                                                                                    |
| tags=22%, list=11%, signal=22%  | Hspa1a/Jun/Hspa1b/Atf3/Marck41/Sertad1/Klf4/R30/NfkBia/Nr4a1/Dusp1/Klf10/Myc/Gpx1/Fth1/Zfp36/Junb/Cited2/Egr1/Jund/Sirt1/Dhps/Nap11/Map2k1/Ccdc117/Rps4x/Tspo/Trnfrf13c                                                                                                                                        |
| tags=14%, list=5%, signal=14%   | Hspa1a/Hspb1/Jun/Hspa1b/Ppp1r15a/Klf4/Dnaj1/Hsp90ab1/Nr4a1/Gapdh/Dusp1/Gpx1/Abcn1/Ddx/Zfp36                                                                                                                                                                                                                    |
| tags=28%, list=14%, signal=26%  | Camk2d/Tcig1/Lrrcc8/Cd84/Diaph1/mt-Nd4/Ano6/Ahnak/Syk/Mef2c/Kcnq5/mt-Atp6/mt-Cytb/Cab39/Atp2b1/mt-Co1/mt-Atp6/mt-Co3/mt-Co2/mt-Nd5/Nsf/Pde4b/Wnk1                                                                                                                                                              |
| tags=48%, list=31%, signal=35%  | Polg/Ranbp2/Rere/Tufm/Zmynd11/Setx/Mnpp1/Celf2/Ctnnb1/Hvep2/Mecp2/Sars/Ndufv1/Fus/Cux1/Zlyve27/Son/Foxp1/Kras/Zeb2/Atad1/Matr3/Sptbn1/Ubtfl/Ppp1r15b/Tc4/mt-Nd4/mt-Nd3/Kcnq5/mt-Atp6/Ralgapa1/Pga                                                                                                              |
| tags=67%, list=41%, signal=42%  | Pten/Dnm2/PprB/Apoe/Smrce1/Flii/Bptf/Xytl1/Chd7/Ctcf/Rad21/Kmt2c/Phip/Chd8/Rere/Phf21a/Ube4b/Ep300/Ctnnb1/Mecp2/Usp7/Foxp1/Sptbn1/Sh3bp1/Ddx6/Crebbp/Herc1/Setd2/Atf4/Satb1/Trappc9                                                                                                                            |
| tags=38%, list=5%, signal=36%   | mt-Atp6/mt-Cytb/mt-Co1/mt-Atp6/mt-Co3/mt-Co2                                                                                                                                                                                                                                                                   |
| tags=56%, list=14%, signal=49%  | Son/Kras/Sptbn1/Ppp1r15b/Tc4/Kmt2c/Crebbp/Atf4/Kdm6b                                                                                                                                                                                                                                                           |
| tags=56%, list=37%, signal=37%  | Smrce1/Flii/Bptf/Chd7/Jmjd1c/Rad21/Ctcf/Phip/Polg/Chd8/Phf21a/Tmem127/Ep300/Celf2/Rnf125/Hvep2/Mecp2/Sars/Ndufv1/H2-Q7/Fus/Usp7/Med13/Foxp1/Kras/Matr3/Sptbn1/Ubtfl/Tc4/Kmt2e/Ddx6/mt-Nd4/Crebbp/                                                                                                              |
| tags=39%, list=12%, signal=35%  | Rfc1/Ubtfl/Ppp1r15b/Tc4/mt-Nd4/Herc1/mt-Nd3/mt-Atp6/mt-Nd1/mt-Nd2/mt-Nd5/mt-Nd6                                                                                                                                                                                                                                |
| tags=33%, list=15%, signal=30%  | Ankrd11/Foxp1/Fbxo38/Kras/Zeb2/Atad1/Matr3/Sptbn1/Ubtfl/mt-Nd4/Crebbp/Pgap1/mt-Nd1/mt-Co1/mt-Co3/mt-Co2/Satb1/mt-Nd5/Trappc9/Nsf/mt-Nd6/Wnk1                                                                                                                                                                   |
| tags=53%, list=8%, signal=50%   | Tmem127/Stat4/Setx/lvns1abp/Ctnnb1/Rnf125/Krt11/H2-Q7/mt-Nd4/mt-Atp6/Smchd1/mt-Cytb/mt-Nd1/mt-Co1/mt-Co3/mt-Nd2/mt-Nd5/mt-Nd4/mt-Nd6                                                                                                                                                                           |
| tags=47%, list=31%, signal=35%  | Nros/Polg/Rere/Ube4b/Exosc1/Zmynd11/Wip2/Celf2/Tpp1/Rnf125/Hvep2/Mecp2/Sars/Cux1/Med13/Kras/Atad1/Ubtfl/Tc4/Kmt2e/Ddx6/mt-Nd4/Herc1/Mef2c/Kcnq5/Setd2/mt-Atp6/Ralgapa1/Pgap1/mt-Nd1/mt-Co1/mt-C                                                                                                                |
| tags=75%, list=6%, signal=70%   | Syk/Igfa4/Wnk1                                                                                                                                                                                                                                                                                                 |
| tags=39%, list=22%, signal=32%  | Cond2/Rnf125/Hvep2/Mecp2/Sars/Fus/Cux1/Med13/Son/Kras/Zeb2/Ubtfl/Tc4/Kmt2e/Ddx6/mt-Nd4/Herc1/Mef2c/Kcnq5/mt-Atp6/Pgap1/mt-Nd1/mt-Co1/mt-Co3/mt-Co2/Satb1/mt-Nd5/Trappc9/Macf1/mt-Nd6                                                                                                                           |
| tags=73%, list=21%, signal=58%  | Chd1/Usup7/Med13/Foxp1/Kmt2e/Ddx6/Satb1/Kdm6b                                                                                                                                                                                                                                                                  |
| tags=33%, list=14%, signal=30%  | Tcig1/Rfc1/Sptbn1/Ppp1r15b/mt-Nd4/Setd2/mt-Atp6/mt-Cytb/Pgap1/mt-Nd1/mt-Co1/mt-Co3/mt-Nd2/Satb1/mt-Nd5/mt-Nd4/mt-Nd6                                                                                                                                                                                           |
| tags=29%, list=4%, signal=28%   | Hspa1a/Hspb1/Dnaj1/Gpx1                                                                                                                                                                                                                                                                                        |
| tags=75%, list=23%, signal=59%  | Rps17/Rpl31/Rps26/Rpl18/Rps24/Rps20/Rps7/Rpl35/Rps27/Polr1d/Rpl15/Rps10/Rpl35a/Rps19/Rps28                                                                                                                                                                                                                     |
| tags=43%, list=21%, signal=36%  | Hvep2/Mecp2/H2-Q7/Fus/Cux1/Ankrd11/Son/Zeb2/Matr3/Ubtfl/Tc4/mt-Nd4/mt-Nd3/Kcnq5/mt-Atp6/mt-Nd1/mt-Nd2/Satb1/mt-Nd5/Macf1/mt-Nd6                                                                                                                                                                                |
| tags=50%, list=23%, signal=40%  | Rnf213/Sh2b3/Mecp2/Krt11/Son/Kras/Sptbn1/mt-Nd4/Ganab/mt-Cytb/mt-Nd1/mt-Co1/mt-Co3/mt-Co2/mt-Nd5/mt-Nd6                                                                                                                                                                                                        |
| tags=70%, list=23%, signal=54%  | Actg1/Rps17/Rpl31/Rps26/Rpl18/Map2k1/Rps24/Rps20/Rps7/Rpl35/Rps27/Rpl15/Rps10/Rpl35a/Rps19/Rps28                                                                                                                                                                                                               |
| tags=69%, list=26%, signal=53%  | Hspb1/Rps17/Rpl31/Rps26/Rpl18/Chchd10/Rps24/Rps20/Rps7/Rpl35/Rps27/Rpl15/Rps10/Rpl35a/Rps19/Rps28/Bin1/Gars                                                                                                                                                                                                    |
| tags=50%, list=8%, signal=46%   | mt-Nd4/mt-Nd1/mt-Nd2/mt-Nd5/mt-Nd6                                                                                                                                                                                                                                                                             |
| tags=100%, list=6%, signal=94%  | Hsp90aa1/Hsp90ab1/Egr1                                                                                                                                                                                                                                                                                         |
| tags=100%, list=6%, signal=94%  | Hsp90aa1/Hsp90ab1/Egr1                                                                                                                                                                                                                                                                                         |
| tags=19%, list=4%, signal=19%   | Hspa1a/Hspb1/Hspa1b/Dnaj1/Gpx1                                                                                                                                                                                                                                                                                 |
| tags=38%, list=10%, signal=36%  | Tc4/mt-Nd4/Ganab/mt-Nd3/Stt3b/mt-Atp6/mt-Nd1/mt-Nd2/mt-Nd5/mt-Nd6                                                                                                                                                                                                                                              |
| tags=31%, list=15%, signal=28%  | Med13/Son/Kras/Zeb2/Sptbn1/Kmt2e/Ddx6/mt-Nd4/Ganab/Crebbp/Setd2/mt-Atp6/Atf4/mt-Nd1/mt-Cytb/mt-Nd1/mt-Co1/mt-Co3/mt-Nd2/Satb1/mt-Nd5/mt-Nd4/mt-Nd6                                                                                                                                                             |
| tags=10%, list=3%, signal=11%   | Hspa1a/Jun/Hspa8/Hspa1b/Ppp1r15a/Ubb/Sertad1/Klf4/Hsp90ab1/Tubb5/Rhob/d3/Nr4a1/Tuba1a/Dusp1/Myc                                                                                                                                                                                                                |
| tags=28%, list=8%, signal=28%   | Camk2d/Tcig1/Lrrcc8/Diaph1/mt-Nd4/Ano6/Ahnak/Mef2c/Kcnq5/mt-Atp6/mt-Cytb/Cab39/Atp2b1/mt-Co1/mt-Atp6/mt-Co3/It2/mt-Co2/mt-Nd5/Pde4b/Wnk1                                                                                                                                                                       |
| tags=100%, list=2%, signal=98%  | Klf4/Nr4a1                                                                                                                                                                                                                                                                                                     |
| tags=28%, list=6%, signal=27%   | Hspa1a/Hspa8/Hspa1b/Hsp90aa1/Hsp90ab1/Fth1/Dynl1                                                                                                                                                                                                                                                               |
| tags=36%, list=11%, signal=33%  | Sptbn1/Tc4/mt-Nd4/Setd2/mt-Nd1/mt-Co1/mt-Co3/mt-Co2/mt-Nd5/mt-Nd6                                                                                                                                                                                                                                              |
| tags=60%, list=15%, signal=52%  | Klf4/Hsp90aa1/Hsp90ab1/Myc/Ptges3/Pold4/Sirt1/Nhp2/Pcna                                                                                                                                                                                                                                                        |
| tags=43%, list=1%, signal=43%   | Hspb1/Hspa8/Ubb                                                                                                                                                                                                                                                                                                |
| tags=43%, list=1%, signal=43%   | Hspb1/Hspa8/Ubb                                                                                                                                                                                                                                                                                                |
| tags=54%, list=37%, signal=37%  | Bptf/Slc12a6/Chd7/Ube3b/Rad21/Rasa2/Cgt/Ctcf/Phip/Polg/Rere/Phf21a/Tufm/Ube4b/Setx/Ep300/Mnpp1/Hps3/Celf2/Tpp1/Ctnnb1/Ndufv1/H2-Q7/Fus/Usup7/Med13/Ankrd11/Son/Tcig1/Foxp1/Kras/Rfc1/Kmt2e/Ddx6/mt                                                                                                             |
| tags=36%, list=4%, signal=35%   | Hspa1a/Hspa1b/Hsp90ab1/Gpx1                                                                                                                                                                                                                                                                                    |
| tags=13%, list=5%, signal=14%   | Hspa1a/Hspb1/Jun/Hspa8/Hspa1b/Fos/Hsp90aa1/Hsp90ab1/Tubb5/NfkBia/Nr4a1/Gapdh/Pmaip1/Myc/Gpx1/Hspd1/Ms4a1/Traf4/Zfp36/Actg1                                                                                                                                                                                     |
| tags=85%, list=27%, signal=63%  | Rps5/Rpsa/Rpl38/Rps27/Rpl24/Abt1/Rps19/Rps28/Npm1/C1tqbp/Dhx30                                                                                                                                                                                                                                                 |
| tags=20%, list=6%, signal=20%   | Hspb1/Jun/Klf2/Ubb/Klf4/Rhob/Nr4a1/Myc/Gpx1/Ptges3/Traf4/Actg1/Junb/Cited2                                                                                                                                                                                                                                     |
| tags=100%, list=2%, signal=98%  | Tubb5/Cacybp                                                                                                                                                                                                                                                                                                   |
| tags=61%, list=25%, signal=46%  | Ep300/Mecp2/Ndufv1/Sptbn1/Crebbp/Herc1/mt-Nd3/Mef2c/Setd2/mt-Nd1/mt-Nd2                                                                                                                                                                                                                                        |
| tags=28%, list=7%, signal=27%   | Jun/Atf3/Fos/Klf4/Klf6/Nr4a1/Klf10/Myc/Junb/Egr1/Jund                                                                                                                                                                                                                                                          |
| tags=64%, list=41%, signal=60%  | Pten/Pex7/Apoe/Smrce1/Slc12a6/Chd7/Ctcf/Tbce/Polg/Ranbp2/Rere/Ube4b/Stat4/Setx/Mecp2/Ndufv1/H2-Q7/Fus/Zlyve27/Kras/Ppp1r15b/mt-Nd4/mt-Atp6/mt-Cytb/Pgap1/mt-Nd1/mt-Co1/mt-Atp6/mt-Co3/mt-Co2/mt-4                                                                                                              |
| tags=50%, list=8%, signal=47%   | Ano6/Kcnq5/Cab38/Nsf/Wnk1                                                                                                                                                                                                                                                                                      |
| tags=100%, list=3%, signal=97%  | Wnk1                                                                                                                                                                                                                                                                                                           |
| tags=75%, list=14%, signal=65%  | Ubb/Pmaip1/Myc/Rps20/Rps7/Rpl37                                                                                                                                                                                                                                                                                |
| tags=70%, list=49%, signal=38%  | Dca8/Lmnb1/Pps13a/Ppp3Sca1/Arid1b/Iscal1/Psapi/Sof1/Dpm1/Pten/Pex7/Dnm2/Copb2/Slc12a6/Nacc1/Ctcf/Ppp2ca/Tbce/Nros/Polg/Rere/Tufm/Exosc1/Ep300/Celf2/Ctnnb1/Polr2a/Ndufv1/Fus/Foxp1/Rfc1/Sptbn1/Ubtfl/Pp                                                                                                        |
| tags=71%, list=23%, signal=56%  | Jun/Klf2/Fos/Rhob/Sirt1/Pcna/Nfe212/Oser1/Prdx3/Rps3                                                                                                                                                                                                                                                           |
| tags=59%, list=37%, signal=39%  | Smrce1/Flii/Bptf/Chd7/Sk11/Rad21/Rasa2/Kmt2c/Polg/Rere/Phf21a/Ube4b/Stat1/Ep300/Ctnnb1/Mecp2/Usup7/Med13/Kras/Sptbn1/Ppp1r15b/Kmt2e/Ddx6/mt-Nd4/Crebbp/Smchd1/mt-Nd1/mt-Co1/mt-Co3/mt-Co2/Satb                                                                                                                 |
| tags=75%, list=4%, signal=73%   | Hspa8/Hsp90ab1/Ptges3                                                                                                                                                                                                                                                                                          |
| tags=21%, list=6%, signal=21%   | Hspa1a/Jun/Hspa1b/Klf2/Fos/NfkBia/Klf10/Myc/Zfp36/Junb/Cited2                                                                                                                                                                                                                                                  |



|                                 |                                                                                                                                                                                                       |
|---------------------------------|-------------------------------------------------------------------------------------------------------------------------------------------------------------------------------------------------------|
| tags=29%, list=1%, signal=29%   | Hspa1a/Hspa1b                                                                                                                                                                                         |
| tags=29%, list=1%, signal=29%   | Hspa1a/Hspa1b                                                                                                                                                                                         |
| tags=16%, list=7%, signal=16%   | Dnajb1/Hspa1a/Jun/Atf3/Klf2/Klf4/Klf3/Klf10/Myc/Zfp36/Cited2/Egr1/Foxp4/Jund                                                                                                                          |
| tags=40%, list=8%, signal=37%   | Hspb1/Klf4/Rhob/Sirt1                                                                                                                                                                                 |
| tags=56%, list=8%, signal=51%   | Tubb5/Cacypb/Chchd2/Timm8b/Chchd10                                                                                                                                                                    |
| tags=36%, list=3%, signal=36%   | Hspa1a/Hspa1b/Fos/Klf10                                                                                                                                                                               |
| tags=100%, list=18%, signal=83% | Fkbp4/Nfatc1/Fkbp3/Fkbp1a                                                                                                                                                                             |
| tags=100%, list=18%, signal=83% | Fkbp4/Nfatc1/Fkbp3/Fkbp1a                                                                                                                                                                             |
| tags=17%, list=6%, signal=17%   | Hspa1a/Hspe1/Hspa8/Hspa1b/Hsp90aa1/Hsp90ab1/Hspd1/Rsf1/Hsph1                                                                                                                                          |
| tags=100%, list=0%, signal=100% |                                                                                                                                                                                                       |
| tags=100%, list=18%, signal=83% | Ubb/Ubc/Uba52/Rps27a                                                                                                                                                                                  |
| tags=17%, list=2%, signal=17%   | Hspa1a/Jun/Fos/Hsp90ab1                                                                                                                                                                               |
| tags=40%, list=28%, signal=34%  | Stat1/Stat4/Zmynd11/Orc3/Ldb1/Uvrag/Ist1/Setx/Ep300/Daxx/Pml/Cond2/Rbm34/Ctnnb1/Ppp25a/Brd9/Arpc5/Chd1/Mecp2/Sp100/Polr2a/Birc2/Nfkb1/Usip7/Nfif/Bms1/Cux1/Cebpg/Nasp/Nfkb2/Ncoa2/Neil1/Klf3/Epc1/B   |
| tags=77%, list=30%, signal=55%  | Rere/Arcn1/Ldb1/Ogdh/Bcl2/Mecp2/Sec24b/mt-Nd4/Herc1/mt-Co1                                                                                                                                            |
| tags=100%, list=13%, signal=87% | Ubb/Myc/Rps7                                                                                                                                                                                          |
| tags=60%, list=15%, signal=51%  | Med13/Kmt2e/Ddx6/Ganab/Atf4/Satb1                                                                                                                                                                     |
| tags=52%, list=23%, signal=41%  | Il4ra/Cr1/H2-Q7/Malt1/Bcl6/Fbxo38/Dhx36/Cd84/Arid5a/Syk/Smad7/Adgre5                                                                                                                                  |
| tags=100%, list=25%, signal=75% | Nfkb2/Kras/Zeb2/Crebbp                                                                                                                                                                                |
| tags=100%, list=13%, signal=87% | Junb/Cited2/Bsg                                                                                                                                                                                       |
| tags=33%, list=15%, signal=29%  | Med13/Ankrd11/Sptbn1/Ppp1r15b/mt-Nd4/Atf4/Smchd1/mt-Nd1/mt-Co1/mt-Co3/mt-Co2/mt-Nd5/Trappc9/mt-Nd6                                                                                                    |
| tags=62%, list=6%, signal=59%   | Atf3/Fos/Nr4a1/Cited2/Egr1                                                                                                                                                                            |
| tags=75%, list=11%, signal=67%  | Sptbn1/Sf3kbp1/Syk                                                                                                                                                                                    |
| tags=75%, list=8%, signal=69%   | Hspb1/Gpx1/Sirt1                                                                                                                                                                                      |
| tags=100%, list=8%, signal=92%  | Atp2b1                                                                                                                                                                                                |
| tags=100%, list=8%, signal=92%  | Atp2b1                                                                                                                                                                                                |
| tags=31%, list=6%, signal=30%   | Jun/Klf4/Nfkbia/Myc/Rsf1                                                                                                                                                                              |
| tags=30%, list=15%, signal=27%  | H2-Q7/Fus/Usip7/Zfyve27/Med13/Fbxo38/Kras/Zeb2/Rbc1/Atad1/Matr3/Sptbn1/Ubrf/Ppp1r15b/Tcf4/Kmt2e/Ddx6/CfR2/mt-Nd4/Crebbp/Herc1/mt-Nd3/Mef2c/Kcnq5/mt-Atp6/Pgap1/mt-Nd1/mt-Co1/mt-Co3/mt-Nd2/mt-Co2     |
| tags=33%, list=1%, signal=33%   | Hspa1a/Hspa1b                                                                                                                                                                                         |
| tags=75%, list=1%, signal=75%   | Hspa1a/Hspa8/Hspa1b                                                                                                                                                                                   |
| tags=60%, list=2%, signal=59%   | Jun/Fos/Nfkbia                                                                                                                                                                                        |
| tags=47%, list=14%, signal=41%  | Hspa1a/Hspa1b/Dnajai1/Tspo/Rps20/Rps7/Rpl37                                                                                                                                                           |
| tags=18%, list=6%, signal=18%   | Hspb1/Jun/Klf2/Klf4/Rhob/Nr4a1/Myc/Gpx1/Actg1/Junb/Cited2                                                                                                                                             |
| tags=43%, list=6%, signal=40%   | Syk/Pde4b/Adgre5                                                                                                                                                                                      |
| tags=54%, list=15%, signal=46%  | Med13/Tcirg1/Kras/Zeb2/Kmt2e/Ddx6/Satb1                                                                                                                                                               |
| tags=66%, list=37%, signal=42%  | Bptf/Rasa2/Ctcf/Tbce/Php/Exosc1/Cellf2/Cnd2/Polr2a/Med13/Ankrd11/Kras/Fbxo11/Sptbn1/Kmt2e/Ddx6/Mef2c/Setd2/Satb1                                                                                      |
| tags=100%, list=18%, signal=83% | Kras/Syk                                                                                                                                                                                              |
| tags=14%, list=4%, signal=14%   | Hspa1a/Hspe1/Hspa1b/Pmaip1/Myc/Hspd1                                                                                                                                                                  |
| tags=28%, list=5%, signal=27%   | Hspa1a/Hspa1b/Fos/Nfkbia/Klf10/Myc/Zfp36                                                                                                                                                              |
| tags=100%, list=6%, signal=94%  | Junb/Cited2                                                                                                                                                                                           |
| tags=27%, list=2%, signal=27%   | Hspa1a/Hspa1b/Hsp90aa1/Hsp90ab1                                                                                                                                                                       |
| tags=64%, list=26%, signal=46%  | Actg1/Rps17/Rps31/Rps26/Rpl18/Rps24/Rps20/Rps7/Rpl35/Rps27/Rpl15/Rps10/Rpl35a/Rps19/Rps28/Tmcot                                                                                                       |
| tags=100%, list=0%, signal=100% | Hspa1a                                                                                                                                                                                                |
| tags=38%, list=8%, signal=36%   | mt-Nd4/mt-Atp6/mt-Nd1/mt-Co1/mt-Co3/mt-Co2/mt-Nd5/mt-Nd6                                                                                                                                              |
| tags=100%, list=6%, signal=94%  | Myc/Egr1                                                                                                                                                                                              |
| tags=40%, list=8%, signal=37%   | Hspa1a/Hsp90aa1/Pmaip1/Myc/Timm8b/Chchd10                                                                                                                                                             |
| tags=41%, list=14%, signal=36%  | Rasd1/Hsp90ab1/Tubb5/Rhob/Tuba1a/Rrad/Fkbp4/Rap1a/Rala/Eif2b2/Tuba1b                                                                                                                                  |
| tags=57%, list=11%, signal=51%  | Jun/Klf4/Msp2k1/Tspo                                                                                                                                                                                  |
| tags=16%, list=9%, signal=16%   | Dnajb1/Hspa1a/Jun/Hspa8/Atf3/Klf2/Klf4/Rasd1/Ikzf3/Klf10/Myc/Zfp36/Rsf1/Hnmpab/Cited2/Egr1/Foxp4/Jund/Rps26/Dedd2/Sirt1/Sap18/Ube2d1                                                                  |
| tags=36%, list=8%, signal=33%   | Hspb1/Klf4/Nr4a1/Gpx1/Sirt1                                                                                                                                                                           |
| tags=40%, list=1%, signal=40%   | Dnajb1/Dnajai1                                                                                                                                                                                        |
| tags=16%, list=5%, signal=16%   | Hspa1a/Jun/Hspa1b/Klf4/Ikzf3/Dusp1/Klf10/Myc/Fth1                                                                                                                                                     |
| tags=100%, list=18%, signal=82% | Nfkb2/Tcirg1                                                                                                                                                                                          |
| tags=46%, list=23%, signal=36%  | Il4ra/Cr1/H2-Q7/Cebpg/Malt1/Bcl6/Tcirg1/Fbxo38/Dhx36/Cd84/Kmt2e/Inpp5d/Arid5a/Syk/Smad7/Adgre5                                                                                                        |
| tags=23%, list=1%, signal=23%   | Hspb1/Hspa8/Ubb                                                                                                                                                                                       |
| tags=57%, list=13%, signal=50%  | Lrrc8c/Ano6/Kcnq5/Pde4b                                                                                                                                                                               |
| tags=100%, list=37%, signal=63% | Rere/Chd1/Son/Zeb2/Sptbn1/Herc1                                                                                                                                                                       |
| tags=67%, list=11%, signal=60%  | Jun/Klf4/Msp2k1/Tspo                                                                                                                                                                                  |
| tags=33%, list=9%, signal=31%   | Hspa1a/Hspa1b/Senp6/Fkbp4                                                                                                                                                                             |
| tags=12%, list=3%, signal=13%   | Hspa1a/Hspa8/Hspa1b/Hsp90aa1/Capg                                                                                                                                                                     |
| tags=29%, list=10%, signal=27%  | Amt/mt-Nd4/mt-Nd3/mt-Atp6/mt-Cytb/mt-Nd1/mt-Co1/mt-Atp6/mt-Co3/mt-Nd2/mt-Co2/mt-Nd5/mt-Nd4/mt-Nd6                                                                                                     |
| tags=43%, list=16%, signal=37%  | Jun/Fos/Hsp90ab1/Myc/Gpx1/Umps/Tspo/Cd69/Pcna/Bcar3                                                                                                                                                   |
| tags=67%, list=1%, signal=66%   | Hspa1a/Hspa1b                                                                                                                                                                                         |
| tags=67%, list=1%, signal=66%   | Hspa1a/Hspa1b                                                                                                                                                                                         |
| tags=27%, list=3%, signal=27%   | Hspa1a/Hspa8/Dazap1                                                                                                                                                                                   |
| tags=50%, list=3%, signal=49%   | Lrrc8c/Igfa4/Ill10ra/rs2/Wnk1                                                                                                                                                                         |
| tags=51%, list=37%, signal=34%  | Smarce1/Filii/Bptf/Xytl1/Ube3b/Nacc1/Cnot1/Ctcf/Ppp2ca/Kmt2c/Tbce/Kat5a/Rere/Phf21a/Ube4b/Stat4/Zmynd11/Wip2/Ep300/Cellf2/Tpp1/Cnd2/Rnf125/Hivep2/Mecp2/Sars/Usip7/Med13/Ankrd11/Foxp1/Fbxo11/Zeb2/Rf |
| tags=56%, list=37%, signal=37%  | Smarce1/Filii/Bptf/Xytl1/Chtd7/Ube3b/Rad21/Rasa2/Ogt/Ubr1/Php/Rere/Phf21a/Ube4b/Wip2/Ep300/Rnf6/Mecp2/Usip7/Med13/Ankrd11/Kras/Fbxo11/Ppp1r15b/Tcf4/Kmt2e/Ddx6/Crebbp/Satb1/Tappc9/Kdm6b              |
| tags=50%, list=13%, signal=44%  | Fos/Dazap1/Junb/Umps/Cited2/Fkbp4/Bsg                                                                                                                                                                 |
| tags=100%, list=14%, signal=86% | Rps20/Rps7/Rpl37                                                                                                                                                                                      |
| tags=100%, list=14%, signal=86% | Rps20/Rps7/Rpl37                                                                                                                                                                                      |
| tags=37%, list=19%, signal=31%  | Ndufv1/H2-Q7/Ankrd11/Kras/mt-Nd4/mt-Nd3/mt-Atp6/mt-Nd1/mt-Co1/mt-Co3/mt-Nd2/mt-Co2/mt-Nd5/mt-Nd6                                                                                                      |
| tags=19%, list=4%, signal=18%   | Hspa1a/Hspa1b/Atf3/Pmaip1/Gpx1                                                                                                                                                                        |
| tags=64%, list=23%, signal=50%  | Rps17/Rps5/Rps8/Rpsa/Rps24/Rps7/Rpl38/Rps27/Rps21/Rps16/Abt1/Rps19/Rps28/Npm1                                                                                                                         |
| tags=50%, list=7%, signal=47%   | Jun/Fos/Junb/Jund                                                                                                                                                                                     |
| tags=40%, list=1%, signal=40%   | Hspa1a/Hspa1b                                                                                                                                                                                         |
| tags=75%, list=31%, signal=52%  | Jak1/Stat1/Ivms1abp/H2-Q7/Atad1/Tcf4/Syk/Bach2/Ill0ra                                                                                                                                                 |
| tags=13%, list=7%, signal=14%   | Dnajb1/Hspa1a/Jun/Atf3/Klf2/Fos/Sertad1/Klf4/Ikzf3/Klf6/Nr4a1/Klf10/Myc/Rsf1/Junb/Cited2/Egr1/Foxp4/Jund                                                                                              |
| tags=20%, list=4%, signal=19%   | Hspa1/Klf4/Nr4a1/Gapdh/Pmaip1/Myc/Gpx1/Hspd1                                                                                                                                                          |
| tags=61%, list=27%, signal=45%  | Zmynd11/Ep300/Hivep2/Cux1/Ankrd11/Son/Zeb2/Tcf4/Crebbp/Kcnq5/Satb1                                                                                                                                    |
| tags=69%, list=47%, signal=38%  | Sart3/Atx/Iws1/Ep400/Kdm7a/Eny2/Phf20t1/Phf20/Ube2b/Atf2/Snn1/Brd9/Prkbc/Jmjd1c/Pax5/Ogt/Rhf1/Kmt2c/Paf1/Kat6a/Per1/Ldb1/Ep300/Ctnnb1/Chtop/Mecp2/Usip16/Usip15/Usip7/Prdm2/Epc1/Camk2d/Bcl6/Supt20/  |
| tags=100%, list=9%, signal=91%  | Smg1                                                                                                                                                                                                  |
| tags=67%, list=1%, signal=66%   | Hspa1a/Hspa1b                                                                                                                                                                                         |
| tags=67%, list=1%, signal=66%   | Hspa1a/Hspa1b                                                                                                                                                                                         |
| tags=18%, list=4%, signal=18%   | Hspb1/Jun/Klf4/Rhob/Nr4a1/Gpx1                                                                                                                                                                        |
| tags=41%, list=26%, signal=32%  | Setv/Ep300/Mnpp1/Tpp1/Mecp2/Ndufv1/H2-Q7/Fus/Zfyve27/Kras/Zeb2/Atad1/Matr3/Sptbn1/Ppp1r15b/mt-Nd4/Crebbp/mt-Nd3/mt-Atp6/Pgap1/mt-Nd1/mt-Nd2/mt-Nd5/mt-Nd6                                             |
| tags=25%, list=1%, signal=25%   | Hspa1a/Hspa1b                                                                                                                                                                                         |
| tags=25%, list=1%, signal=25%   | Hspa1a/Hspa1b                                                                                                                                                                                         |
| tags=50%, list=15%, signal=43%  | Med13/Ppp1r15b/Kmt2e/Ddx6/CfR2/Setd2/Satb1                                                                                                                                                            |
| tags=79%, list=37%, signal=50%  | Bptf/Chtd7/Rere/Ube4b/H2-Q7/Med13/Kmt2e/Ddx6/Ganab/Atf4/Satb1                                                                                                                                         |
| tags=75%, list=11%, signal=67%  | Ankrd13c/Cblb/Mef2c                                                                                                                                                                                   |
| tags=17%, list=4%, signal=17%   | Hspa1a/Hspa1b/Ubb/Hsp90aa1/Hsp90ab1/Gpx1                                                                                                                                                              |
| tags=100%, list=25%, signal=75% | Crebbp/Ikbbk/Syk                                                                                                                                                                                      |
| tags=100%, list=25%, signal=75% | Zeb2/Atad1/Crebbp                                                                                                                                                                                     |
| tags=100%, list=25%, signal=75% | Ctnnb1/Crebbp/Setd2                                                                                                                                                                                   |
| tags=100%, list=28%, signal=73% | Stat4/H2-Q7/Malt1/Foxp1/Tcf4/Birc3                                                                                                                                                                    |
| tags=12%, list=2%, signal=13%   | Hspa1a/Hspa1b/Ubb/Dnajai1/Hsp90aa1/Hsp90ab1                                                                                                                                                           |
| tags=83%, list=18%, signal=69%  | H2-Q7/Cd2/Cebpg/Arid5a/Pde4b                                                                                                                                                                          |
| tags=67%, list=1%, signal=66%   | Klf2/Klf4                                                                                                                                                                                             |
| tags=21%, list=4%, signal=21%   | Hspa1a/Hspa1b/Ubb/Hsp90ab1/Gpx1                                                                                                                                                                       |
| tags=67%, list=5%, signal=64%   | Atf4/Wnk1                                                                                                                                                                                             |
| tags=33%, list=18%, signal=29%  | Hspa1a/Hspb1/Hspa8/Hspa1b/Rhob/Csrp1/Traf4/Actg1/Rpl20/Rps17/Rps5/Rps8/Rpl31/Rpl18/Map2k1/Rps4x/Rpl19/Rala/Vapa/Rpl8/Rps7/Bsg/Rpl38/Rpl30/Bcar3/Rpl7a/Rps16/Rps28/Rps13                               |
| tags=23%, list=2%, signal=23%   | Hspa1a/Hspa8/Rhob                                                                                                                                                                                     |
| tags=100%, list=15%, signal=85% | Pold4/Sirt1/Pcna                                                                                                                                                                                      |
| tags=18%, list=2%, signal=18%   | Hspb1/Jun/Klf4/Rhob                                                                                                                                                                                   |
| tags=75%, list=22%, signal=59%  | Bcl2/H2-Q7/Malt1/Bcl6/Foxp1/Birc3                                                                                                                                                                     |
| tags=26%, list=9%, signal=24%   | Hspa1a/Hspa8/Hspa1b/Pges3/Zfp36/Sirt1/Fkbp4                                                                                                                                                           |
| tags=56%, list=39%, signal=36%  | Pten/Prpf8/Apoe/Bptf/Xytl1/Chtd7/Ube3b/Skt11/Jmjd1c/Rasa2/Ubr1/Php/Kat6a/Rere/Tmem127/Ube4b/Stat4/Eif2ak3/Ep300/Bcl2/Ctnnb1/Atp2c1/H2-Q7/Fus/Nfkb1/Bms1/Med13/Ankrd11/Bcl6/Tcirg1/Kras/Sptbn1/Tcf4/Km |
| tags=27%, list=9%, signal=25%   | Hspa1a/Jun/Fos/Hsp90ab1/Cited2/Egr1/Sirt1/Ube2d1                                                                                                                                                      |
| tags=9%, list=2%, signal=10%    | Dnajb1/Hspb1/Hspa8/Fos/Ubb/Hsp90aa1/Hsp90ab1                                                                                                                                                          |
| tags=50%, list=1%, signal=50%   | Hspa1a/Hspa1b                                                                                                                                                                                         |
| tags=31%, list=15%, signal=28%  | Med13/Foxp1/Matr3/Sptbn1/Ppp1r15b/Kmt2e/Ddx6/mt-Nd4/mt-Nd3/mt-Atp6/mt-Nd1/mt-Nd2/Satb1/mt-Nd5/mt-Nd6                                                                                                  |
| tags=50%, list=12%, signal=44%  | Akap13/S1pr1/S1pr4/Pde4b/Adgre5                                                                                                                                                                       |
| tags=15%, list=6%, signal=15%   | Hspb1/Jun/Ppp1r15a/Klf4/Dnajai1/Ikzf3/Nfkbia/Nr4a1/Gapdh/Dusp1/Gpx1/Rrad/Zfp36/Rsf1                                                                                                                   |
| tags=100%, list=10%, signal=90% | Smchd1                                                                                                                                                                                                |
| tags=100%, list=10%, signal=90% | Smchd1                                                                                                                                                                                                |
| tags=100%, list=10%, signal=90% | Bach2                                                                                                                                                                                                 |
| tags=60%, list=2%, signal=59%   | Klf2/Klf4/Nr4a1                                                                                                                                                                                       |
| tags=67%, list=5%, signal=63%   | mt-Atp6/mt-Atp8                                                                                                                                                                                       |
| tags=100%, list=41%, signal=60% | Apoe/Stat4/Bcl2/Ctnnb1/H2-Q7/Fus/Bcl6/Kras                                                                                                                                                            |
| tags=67%, list=24%, signal=52%  | Ubb/Rps17/Rpl31/Rps26/Rpl18/Rps24/Rps20/Rps7/Rpl35/Rps27/Rpl15/Rps10/Rpl35a/Rps19/Rps28/Bin1                                                                                                          |
| tags=41%, list=30%, signal=31%  | Rere/Tmem127/Ube4b/Eif2ak3/Setx/Daxx/Hps3/Pml/Rtrf213/S2b3/Ctnnb1/Krt1/Atp2c1/H2-Q7/Nfkb1/Nfkb2/Tcirg1/Kras/Sptbn1/Ppp1r15b/Tcf4/Kmt2e/Ddx6/mt-Nd4/Syk/Setd2/mt-Atp6/mt-Cytb/mt-Nd1/mt-Co1/mt-Co3/    |
| tags=67%, list=6%, signal=63%   | Syk/Wnk1                                                                                                                                                                                              |
| tags=67%, list=3%, signal=65%   | Atp2b1/Tim25                                                                                                                                                                                          |
| tags=13%, list=2%, signal=13%   | Hspb1/Jun/Fos/Klf4/Dnajai1/Nfkbia/Nr4a1                                                                                                                                                               |
| tags=62%, list=38%, signal=39%  | Apoe/Prpf2/Xytl1/Chtd7/Ube3b/Rere/Tmem127/Ube4b/Stat4/Ep300/Ctnnb1/Krt1/H2-Q7/Malt1/Foxp1/Kras/Zeb2/Sptbn1/Tcf4/Ddx6/Crebbp/Sf3b1/Smchd1/Birc3                                                        |
| tags=86%, list=30%, signal=60%  | Chd8/Ivms1abp/Bdp1/Dhx36/Smarca5/Sf3b1                                                                                                                                                                |
| tags=73%, list=41%, signal=44%  | Pten/Bptf/Xytl1/Kat6a/Ep300/Rnf6/Mecp2/Usip7/Med13/Zeb2/Tcf12/Ppp1r15b/Kmt2e/Ddx6/Crebbp/Satb1                                                                                                        |
| tags=21%, list=4%, signal=21%   | mt-Cytb/mt-Nd1/mt-Co1/mt-Co3/mt-Co2/mt-Nd5/mt-Nd6                                                                                                                                                     |
| tags=36%, list=8%, signal=33%   | Hspa1a/Pmaip1/Gpx1/Hspd1/Chchd10                                                                                                                                                                      |
| tags=30%, list=2%, signal=30%   | Hspa8/Hsp90aa1/Ill30                                                                                                                                                                                  |
| tags=14%, list=2%, signal=14%   | Hspa1a/Jun/Fos/Hsp90ab1                                                                                                                                                                               |
| tags=100%, list=8%, signal=92%  | Fth1/Fth1                                                                                                                                                                                             |
| tags=100%, list=8%, signal=92%  | Fth1/Fth1                                                                                                                                                                                             |
| tags=100%, list=8%, signal=92%  | Hspd1/Fth1                                                                                                                                                                                            |
| tags=67%, list=2%, signal=65%   | Hspb1/Nr4a1                                                                                                                                                                                           |
| tags=63%, list=39%, signal=39%  | Prpf8/Smarce1/Chtd7/Rasa2/Polg/Rere/Ube4b/Ctnnb1/Mecp2/Usip7/Kras/mt-Nd4/Smchd1/mt-Nd1/mt-Co1/mt-Co3/mt-Co2/mt-Nd5/mt-Nd6                                                                             |
| tags=33%, list=1%, signal=33%   | Hspa1a/Hspa1b                                                                                                                                                                                         |
| tags=50%, list=1%, signal=50%   | Hspb1/Hspa8                                                                                                                                                                                           |
| tags=50%, list=13%, signal=44%  | Hspa1a/Hspa1b/Rpsa/Bsg                                                                                                                                                                                |

|                                 |                                                                                                                                                                                                         |
|---------------------------------|---------------------------------------------------------------------------------------------------------------------------------------------------------------------------------------------------------|
| tags=33%, list=8%, signal=31%   | Atf3/Ubb/Pmaip1/Myc/Ded2/Sirt1                                                                                                                                                                          |
| tags=100%, list=8%, signal=92%  | Ft1/Chchd10                                                                                                                                                                                             |
| tags=100%, list=0%, signal=100% | Hspb1                                                                                                                                                                                                   |
| tags=88%, list=35%, signal=58%  | Hspb1/Chchd10/Hfd1/Bin1/Gars/Uba1/Nop56                                                                                                                                                                 |
| tags=80%, list=14%, signal=69%  | Son/Kras/Zeb2/Smchd1                                                                                                                                                                                    |
| tags=43%, list=8%, signal=40%   | Ano6/Cab39/Wnk1                                                                                                                                                                                         |
| tags=30%, list=11%, signal=27%  | Hspa1a/Hspa1b/Klf2/Nkbia/Zfp36/Sirt1/Traf1/Tnfrsf13c                                                                                                                                                    |
| tags=27%, list=11%, signal=25%  | Hspa1a/Hspa8/Hspa1b/Fox/Ptges3/Zfp36/Sirt1/Fkbp4/Tspo                                                                                                                                                   |
| tags=75%, list=13%, signal=65%  | Kras/Akap13/P2ry10                                                                                                                                                                                      |
| tags=24%, list=11%, signal=23%  | Hspb1/Jun/Klf2/Klf4/Rhob/Nr4a1/Gpx1/Actg1/Junb/Cited2/Egr1/Sirt1/Map2k1/Nfatc1/Rap1a                                                                                                                    |
| tags=57%, list=37%, signal=37%  | Flii/Nacc1/Ctcf/Kat6a/Rere/Ube4b/Zmynd11/Ep300/Chd1/Hivep2/Mecp2/Sars/Cux1/Foxp1/Zeb2/Sptbn1/Tcf4/Ddx6/Crebbp/Mef2c/Kcnq5/Pgap1/Satb1/Trappc9                                                           |
| tags=100%, list=20%, signal=80% | Son/Pgap1                                                                                                                                                                                               |
| tags=100%, list=20%, signal=80% | Polr2a/Satb1                                                                                                                                                                                            |
| tags=100%, list=20%, signal=80% | Foxp1/Sptbn1                                                                                                                                                                                            |
| tags=100%, list=8%, signal=92%  | Cited2/Sirt1                                                                                                                                                                                            |
| tags=100%, list=8%, signal=92%  | Ptges3/Sirt1                                                                                                                                                                                            |
| tags=100%, list=8%, signal=92%  | Cited2/Sirt1                                                                                                                                                                                            |
| tags=48%, list=22%, signal=38%  | Tpp1/Ctnnb1/Birc2/Cd2/Myo1c/S1pr1/Cblb/Inpp5d/Ikbbk/Attnak/Pag1/Birc3/Atp2b1                                                                                                                            |
| tags=57%, list=14%, signal=49%  | Malt1/Cd86/Sptbn1/Pde4b                                                                                                                                                                                 |
| tags=57%, list=13%, signal=50%  | Kras/Zeb2/Tcf4/Ddx6                                                                                                                                                                                     |
| tags=73%, list=26%, signal=55%  | Ubb/Pmaip1/Myc/Sirt1/Rps7/Fist1/Rps3/Ficn                                                                                                                                                               |
| tags=30%, list=14%, signal=27%  | Fbx20/Tcrg1/Cd84/Klf7/Syk/Mef2c/Irs2/Nsf/Adgre5/Wnk1                                                                                                                                                    |
| tags=82%, list=34%, signal=54%  | Ubr1/Kat6a/Ep300/Malt1/Foxp1/Kras/Crebbp/Smchd1/Birc3                                                                                                                                                   |
| tags=73%, list=29%, signal=52%  | Tmem127/Ep300/Mecp2/Med13/Kmt2e/Ddx6/Crebbp/Satb1                                                                                                                                                       |
| tags=80%, list=27%, signal=59%  | Eif2ak3/Mnpp1/Sbno2/Tcrg1/S1pr1/Ano6/Mef2c/Atp2b1                                                                                                                                                       |
| tags=100%, list=2%, signal=98%  | P2ry10/Gpr171                                                                                                                                                                                           |
| tags=42%, list=10%, signal=38%  | Ppp1r15b/Crebbp/Smchd1/Pgap1/Satb1                                                                                                                                                                      |
| tags=75%, list=22%, signal=59%  | Tpp1/Ctnnb1/Tcrg1/S1pr1/Inpp5d/Syk                                                                                                                                                                      |
| tags=50%, list=15%, signal=43%  | Med13/Tcrg1/Kras/Zeb2/Kmt2e/Ddx6/Satb1                                                                                                                                                                  |
| tags=48%, list=36%, signal=33%  | Chd7/Ube3b/Skl1/Jmjd1c/Rad21/Ubr1/Tbce/Kat6a/Jak1/Polg/Rere/Ube4b/Stat1/Stat4/Ep300/Mnpp1/Ivns1abp/Ctnnb1/Ptpr/Mecp2/H2-Q7/Son/Kras/Zeb2/Tcf4/Sh3kbp1/mt-Nd4/Crebbp/Syk/Setd2/Bach2/I10ra/Smad7         |
| tags=100%, list=10%, signal=90% | Smad7                                                                                                                                                                                                   |
| tags=100%, list=11%, signal=90% | Satb1                                                                                                                                                                                                   |
| tags=66%, list=27%, signal=49%  | Ubb/Rps17/Rpl31/Rps26/Rpl18/Rps24/Rps20/Rps7/Rpl35/Rps27/Polr1d/Rpl15/Rps10/Rpl35a/Rps19/Rps28/Tmco1/Arhgap31/Chuk                                                                                      |
| tags=16%, list=6%, signal=18%   | Hspb1/Jun/Klf2/Klf4/Rhob/Ik3/Nr4a1/Cacybp/Gpx1/Actg1/Junb/Cited2/Egr1                                                                                                                                   |
| tags=88%, list=27%, signal=65%  | Eif2ak3/Mnpp1/Sbno2/S1pr1/Ano6/Mef2c/Atp2b1                                                                                                                                                             |
| tags=57%, list=13%, signal=50%  | Dhx36/Akap13/Mef2c/Kdm6b                                                                                                                                                                                |
| tags=12%, list=2%, signal=12%   | Dnajb1/Hspa8/Ubb/Hsp90aa1/Hsp90ab1                                                                                                                                                                      |
| tags=24%, list=8%, signal=24%   | Sptbn1/mt-Nd4/Ganab/mt-Nd3/mt-Atp6/mt-Nd1/mt-Co1/mt-Co3/mt-Nd2/mt-Co2/mt-Nd5/mt-Nd6                                                                                                                     |
| tags=25%, list=13%, signal=22%  | Hspa1a/Jun/Hspa8/Hspa1b/Hsp90ab1/Zfp36/Raf1/Eif3/Rpsa/Alg12/Vapa/Tirm59/Bsg                                                                                                                             |
| tags=75%, list=15%, signal=64%  | Sicleg/Syk/Pag1                                                                                                                                                                                         |
| tags=43%, list=2%, signal=42%   | Ubb/Hsp90aa1/Hsp90ab1                                                                                                                                                                                   |
| tags=29%, list=1%, signal=29%   | Hspa1a/Ppp1r15a                                                                                                                                                                                         |
| tags=65%, list=31%, signal=46%  | Jmjd1c/Jak1/Stat4/Ep300/Ivns1abp/Ik4a/Chd1/H2-Q7/Usfp7/Nfkb2/Foxp1/Sptbn1/Tcf4/Crebbp/Atf4                                                                                                              |
| tags=9%, list=4%, signal=10%    | Hspa1a/Hspb1/Jun/Hspa1a/Atf3/Ubb/Dnaja1/Hsp90aa1/Hsp90ab1/Nkbia/Gapdh/Dusp1/Pmaip1/Myc/Gpx1                                                                                                             |
| tags=22%, list=11%, signal=22%  | Hspa1a/Hspb1/Hspa1b/Fos/Klf4/Hsp90ab1/Rhob/Nkbid/Klf10/Myc/Zfp36/Junb/Cited2/Jund/Sirt1/Nap111/Map2k1/Rap1a/Tspo/Rala                                                                                   |
| tags=30%, list=21%, signal=27%  | Hivep2/Mecp2/Sars/Polr2a/Ndufv1/Fus/Usfp7/Cux1/Med13/Ankrd11/Son/Foxp1/Kras/Sptbn1/Ubtfr/Tcf4/Kmt2e/Ddx6/Ctl2/Crebbp/mt-Nd3/Mef2c/Kcnq5/Setd2/Stt3b/Atf4/Ralgapa1/Pgap1/mt-Nd1/mt-Nd2/Satb1/Trappc9/W   |
| tags=48%, list=21%, signal=38%  | Ctnnb1/Ptprj/H2-Q7/Myo1c/Sptbn1/Diaph1/Plekho1/Atp2b1/Macf1/Adgre5                                                                                                                                      |
| tags=55%, list=41%, signal=35%  | Pten/Pex7/Dnm2/Taf15/Smarce1/Slc12a6/Chd7/Ube3b/Nacc1/Rasa2/Ctcf/Tbce/Polg/Ranbp2/Stat4/Eif2ak3/Setx/Mnpp1/Pmi/Celf2/Mecp2/Sars/Dnajb1/Ndufv1/H2-Q7/Fus/Bms1/Zfyze27/Tcrg1/Fbxo38/Kras/Rtc1/Matr/P      |
| tags=24%, list=9%, signal=22%   | Hspa1a/Hspa1b/Klf2/Nkbia/Nr4a1/Ptges3/Cited2/Sirt1/Fkbp4                                                                                                                                                |
| tags=100%, list=9%, signal=91%  | Azin1/Dhps                                                                                                                                                                                              |
| tags=75%, list=5%, signal=72%   | Ifi30/Myc/Fth1                                                                                                                                                                                          |
| tags=100%, list=9%, signal=91%  | Sirt1/Edad                                                                                                                                                                                              |
| tags=50%, list=1%, signal=49%   | Dnajb1/Dnaja1                                                                                                                                                                                           |
| tags=50%, list=1%, signal=49%   | Dnajb1/Dnaja1                                                                                                                                                                                           |
| tags=74%, list=18%, signal=61%  | Pten/Bptf/Chd7/Rere/Ube4b/H2-Q7/Med13/Sptbn1/Kmt2e/Ddx6/Ganab/Setd2/Atf4/Satb1                                                                                                                          |
| tags=100%, list=11%, signal=89% | S1pr4                                                                                                                                                                                                   |
| tags=100%, list=11%, signal=89% | Syk                                                                                                                                                                                                     |
| tags=100%, list=11%, signal=89% | Syk                                                                                                                                                                                                     |
| tags=100%, list=11%, signal=89% | Syk                                                                                                                                                                                                     |
| tags=100%, list=11%, signal=89% | S1pr4                                                                                                                                                                                                   |
| tags=80%, list=31%, signal=55%  | Jak1/Stat1/Ivns1abp/H2-Q7/Tcf4/Syk/Bach2/I10ra                                                                                                                                                          |
| tags=60%, list=6%, signal=57%   | Jun/Nkbia/Raf1                                                                                                                                                                                          |
| tags=67%, list=6%, signal=63%   | Zbtb10/Simg1                                                                                                                                                                                            |
| tags=48%, list=23%, signal=38%  | Ik4a/Bcl2/Ctnnb1/Mecp2/Kras/Spag9/Akap13/Plekho1/Ctl2/Tmod3/Mef2c/Nfatc3/Kdm6b                                                                                                                          |
| tags=55%, list=15%, signal=47%  | Med13/Zeb2/Kmt2e/Ddx6/Crebbp/Satb1                                                                                                                                                                      |
| tags=50%, list=8%, signal=46%   | Hspb1/Gpx1/Sirt1                                                                                                                                                                                        |
| tags=50%, list=8%, signal=46%   | Hspb1/Gpx1/Sirt1                                                                                                                                                                                        |
| tags=56%, list=34%, signal=38%  | Ctcf/Kat6a/Rere/Ube4b/Zmynd11/Wip2/Ctnnb1/Hivep2/Mecp2/Sars/Cux1/Zeb2/Diaph1/Ppp1r15b/Tcf4/Kcnq5/Pgap1/Trappc9                                                                                          |
| tags=67%, list=3%, signal=65%   | Cab39/Smad7                                                                                                                                                                                             |
| tags=52%, list=23%, signal=41%  | Rc3h2/Ik4a/H2-Q7/Cd2/Pcid2/Malt1/Bcl6/Cd86/Inpp5d/Syk/Smad7                                                                                                                                             |
| tags=36%, list=8%, signal=34%   | Hspa1a/Ppp1r15a/Pmaip1/Sirt1                                                                                                                                                                            |
| tags=34%, list=15%, signal=30%  | Med13/Ankrd11/Kras/Ppp1r15b/Kmt2e/Ddx6/Herc1/Pgap1/Satb1/Trappc9/Kdm6b                                                                                                                                  |
| tags=100%, list=12%, signal=89% | S1pr4                                                                                                                                                                                                   |
| tags=100%, list=12%, signal=89% | S1pr4                                                                                                                                                                                                   |
| tags=100%, list=12%, signal=89% | S1pr4                                                                                                                                                                                                   |
| tags=44%, list=14%, signal=38%  | Son/Sptbn1/Ppp1r15b/Tcf4/Ddx6/Atf4/Trappc9                                                                                                                                                              |
| tags=43%, list=20%, signal=35%  | Mecp2/Polr2a/Fus/Son/Foxp1/Fbxo11/Zeb2/Kmt2e/Crebbp/Pgap1/Satb1/Trappc9                                                                                                                                 |
| tags=78%, list=41%, signal=47%  | Pten/Bptf/Ubr1/Phip/Rere/Tmem127/Ep300/Med13/Kras/Kmt2e/Ddx6/Crebbp/Satb1/Kdm6b                                                                                                                         |
| tags=50%, list=17%, signal=42%  | Usfp7/Med13/Zeb2/Tcf2/Kmt2e/Ddx6/Crebbp/Satb1                                                                                                                                                           |
| tags=21%, list=4%, signal=20%   | Hspe1/Klf4/Nr4a1/Pmaip1/Myc/Gpx1/Hspd1                                                                                                                                                                  |
| tags=40%, list=1%, signal=40%   | Hspa1a/Hspa1b                                                                                                                                                                                           |
| tags=100%, list=12%, signal=88% | Tcf4                                                                                                                                                                                                    |
| tags=23%, list=4%, signal=22%   | Hspb1/Klf4/Rhob/Nr4a1/Gpx1                                                                                                                                                                              |
| tags=71%, list=19%, signal=58%  | Usfp16/Usfp15/Usfp7/Sup120/Usfp36                                                                                                                                                                       |
| tags=100%, list=41%, signal=60% | Apoe/Stat4/Ctnnb1/H2-Q7/Fus/Kras                                                                                                                                                                        |
| tags=53%, list=21%, signal=43%  | Ptprj/Myo1c/Sptbn1/Diaph1/Plekho1/Atp2b1/Macf1/Adgre5                                                                                                                                                   |
| tags=70%, list=41%, signal=42%  | Pten/Bptf/Chd7/Ubr1/Rere/Ube4b/Stat1/H2-Q7/Med13/Sptbn1/Kmt2e/Ddx6/Ganab/Setd2/Atf4/Satb1                                                                                                               |
| tags=67%, list=5%, signal=64%   | Hspb1/Actg1                                                                                                                                                                                             |
| tags=88%, list=53%, signal=42%  | Rabgefi1/Pell1/Ptprc/Tch/Cnr2/H2-M3/Tnfaip82/Laptnm5/Apoe/Ptprn2/Bank1/Rc3h2/Ik4a/Sh2b3/H2-Q7/Bcl6/Cd86/Cd84/Cblb/Inpp5d/Pag1/Smad7                                                                     |
| tags=18%, list=2%, signal=18%   | Hspa1a/Hspa1b/Tubb5                                                                                                                                                                                     |
| tags=13%, list=7%, signal=14%   | Dnajb1/Hspa1a/Jun/Hspa8/Atf3/Klf2/Klf4/Rasd1/Ik3/Gapdh/Klf10/Myc/Dbi/Zfp36/Raf1/Cited2/Egr1/Foxp4/Jund                                                                                                  |
| tags=26%, list=6%, signal=25%   | Hspa1a/Hspa1b/Klf2/Zfp36/Rps17/Cited2                                                                                                                                                                   |
| tags=40%, list=1%, signal=40%   | Jun/Fos                                                                                                                                                                                                 |
| tags=61%, list=42%, signal=37%  | Arid1a/Pten/Pex7/Copb2/Smarce1/Ube3b/Nacc1/Rad21/Ctcf/Kat6a/Zmynd11/Wip2/Hivep2/Mecp2/Sars/Ndufv1/Cux1/Son/Foxp1/Zeb2/Ubtfr/Tcrg1r15b/Tcf4/Herc1/Mef2c/Kcnq5/Setd2/mt-Atp6/Pgap1/Satb1/Trappc9          |
| tags=100%, list=0%, signal=100% | Jun                                                                                                                                                                                                     |
| tags=57%, list=14%, signal=50%  | Bcl6/Akap13/Cdc42se2/P2ry10                                                                                                                                                                             |
| tags=100%, list=9%, signal=91%  | Nr4a1/Fkbp4                                                                                                                                                                                             |
| tags=18%, list=5%, signal=17%   | Hspa1a/Hspa8/Hspa1b/Capp/Gpx1/Actg1                                                                                                                                                                     |
| tags=33%, list=19%, signal=28%  | Ndufv1/Cep83/H2-Q7/Son/Sptbn1/Tcf4/mt-Nd4/Ganab/mt-Nd3/Setd2/mt-Nd1/mt-Co1/mt-Co3/mt-Nd2/mt-Co2/mt-Nd5/mt-Nd6                                                                                           |
| tags=60%, list=8%, signal=56%   | Ano6/Mef2c/Atp2b1                                                                                                                                                                                       |
| tags=14%, list=1%, signal=14%   | Dnajb1/Hspa8                                                                                                                                                                                            |
| tags=27%, list=4%, signal=27%   | Hspa1a/Hspa1b/Gpx1                                                                                                                                                                                      |
| tags=55%, list=15%, signal=47%  | Klf2/Myc/Hnnpab/Lamtor2/Bcl11a/Pcna                                                                                                                                                                     |
| tags=100%, list=12%, signal=88% | Pde4b                                                                                                                                                                                                   |
| tags=13%, list=5%, signal=14%   | Hspb1/Jun/Atf3/Fos/Hsp90aa1/Hsp90ab1/Nkbia/Nr4a1/Gapdh/Cacybp/Tuba1a/Ms4a1/Traf4/Fth1/Dbi/Actg1/P4ha1                                                                                                   |
| tags=78%, list=23%, signal=60%  | Mps6/Rps5/Rps4w/Rpl8/Rpl37/Rps13/Rps3                                                                                                                                                                   |
| tags=62%, list=19%, signal=51%  | Krt11/Ndufv1/mt-Nd3/mt-Nd1/mt-Nd2                                                                                                                                                                       |
| tags=100%, list=22%, signal=78% | Zeb2/Mef2c                                                                                                                                                                                              |
| tags=100%, list=22%, signal=78% | Mef2c/Smad7                                                                                                                                                                                             |
| tags=100%, list=22%, signal=78% | Zeb2/Mef2c                                                                                                                                                                                              |
| tags=53%, list=31%, signal=38%  | Polg/Tmem127/Stat4/Daxx/Pml/Bcl2/Mecp2/Hfgr1/H2-Q7/Fus/Malt1/Bcl6/Foxp1/Kras/Tcf4/Syk/Birc3                                                                                                             |
| tags=60%, list=8%, signal=55%   | Hspb1/Gpx1/Sirt1                                                                                                                                                                                        |
| tags=67%, list=7%, signal=62%   | Ikbbk/I10ra                                                                                                                                                                                             |
| tags=50%, list=11%, signal=45%  | Hspb1/Actg1/Lamtor2/Rap1a                                                                                                                                                                               |
| tags=44%, list=21%, signal=36%  | Hivep2/Mecp2/Cux1/Nfkb2/Son/Zeb2/Tcf4/Kcnq5/Setd2/Pgap1/Satb1                                                                                                                                           |
| tags=54%, list=37%, signal=36%  | Smarce1/Flii/Bptf/Slc12a6/Xytl1/Ube3b/Rad21/Ogt/Kmt2c/Tbce/Phip/Kat6a/Rere/Arccn1/Ube4b/Ep300/Ctnnb1/Usfp7/Med13/Ankrd11/Son/Foxp1/Kras/Fbxo11/Zeb2/Tcf4/Kmt2e/Ddx6/Crebbp/Herc1/Setd2/Sf3b1/Atf4/Satb1 |
| tags=67%, list=6%, signal=63%   | Mef2c/Irga4                                                                                                                                                                                             |
| tags=73%, list=50%, signal=38%  | Gns/Ccdc47/Lmnb1/Ppp3ca/Arid1b/Hnnpbh2/Arid1a/Smarce1/Ube3b/Nacc1/Tbce/Kat6a/Rere/Ube4b/Ep300/Ccnod2/Hivep2/Mecp2/Usfp7/Zeb2/Sptbn1/Ubtfr/Tcf4/Crebbp/Herc1/Kcnq5/Ralgapa1/Pgap1/Satb1/Macf1            |
| tags=100%, list=9%, signal=91%  | Klf2/Map2k1                                                                                                                                                                                             |
| tags=100%, list=9%, signal=91%  | Nkbia/Map2k1                                                                                                                                                                                            |
| tags=39%, list=15%, signal=34%  | Ankrd11/Son/Kras/Sptbn1/Ppp1r15b/Tcf4/Kmt2e/Crebbp/Syk/Atf4/Kdm6b                                                                                                                                       |
| tags=88%, list=57%, signal=38%  | Hspe1/Mps6/Gpx1/Mpl52/Hspd1/Mps12/Alkb2/Atg5e/Atg5c1/Prdx3/Rps3/Ndufs6/C1qbp/Gars/Dhx30/Gls/Mrlp15/Cipo/Glud1/Aco2/Atp5a1/Hspa9/Tamr/Mps7/Iscat1/Accs1/Hadha/Nr3c1                                      |
| tags=38%, list=23%, signal=31%  | Ktn1/Ik4a/Ptprj/Hfgr1/Plaur/H2-Q7/Birc2/Cd2/Tcrg1/Unc5c/S1pr1/Cd84/S1pr4/Ikbbk/Kcnq5/Irga4/Atp2b1/I10ra/P2ry10/Adgre5                                                                                   |
| tags=50%, list=1%, signal=50%   | Atf3/Klf2                                                                                                                                                                                               |
| tags=100%, list=30%, signal=70% | Usfp7/Foxp1/Sptbn1/Satb1                                                                                                                                                                                |
| tags=20%, list=1%, signal=20%   | Hspa1a/Hspa1b                                                                                                                                                                                           |
| tags=75%, list=15%, signal=64%  | Pcid/Inpp5d/Syk                                                                                                                                                                                         |
| tags=75%, list=15%, signal=64%  | Ankrd11/Son/Mef2c                                                                                                                                                                                       |
| tags=100%, list=31%, signal=70% | Egr1/Sirt1/Pcna/Amb2/Casp2                                                                                                                                                                              |

|                                 |                                                                                                                                                                                                     |
|---------------------------------|-----------------------------------------------------------------------------------------------------------------------------------------------------------------------------------------------------|
| tags=40%, list=2%, signal=39%   | Hspa8/Hsp90ab1                                                                                                                                                                                      |
| tags=71%, list=26%, signal=54%  | Rps17/Rpl31/Rps26/Rpl18/Rps24/Rps20/Rps7/Rpl35/Rps27/Rpl15/Rps10/Rpl35a/Rps19/Rps28/F1cn                                                                                                            |
| tags=71%, list=23%, signal=55%  | Rc3h2/I4ra/Bcl6/Cblb/Smad7                                                                                                                                                                          |
| tags=83%, list=25%, signal=63%  | Ep300/Cttnnb1/Krt11/Crebbp/Setd2                                                                                                                                                                    |
| tags=100%, list=23%, signal=78% | Bcl6/Cd86                                                                                                                                                                                           |
| tags=100%, list=23%, signal=78% | Bcl6/Cd86                                                                                                                                                                                           |
| tags=32%, list=14%, signal=29%  | Camk2d/Tcrg1/Diaph1/Ano6/Alnak/Mef2c/Kcnq5/Cab39/Irs2/Pde4b/Wnk1                                                                                                                                    |
| tags=80%, list=14%, signal=69%  | Myc/Fth1/Ft11/Cyp561a3                                                                                                                                                                              |
| tags=67%, list=7%, signal=62%   | Smarca5/Actn1                                                                                                                                                                                       |
| tags=24%, list=4%, signal=23%   | Jun/Klf2/Fos/Rhob/Gpx1                                                                                                                                                                              |
| tags=100%, list=13%, signal=87% | Mef2c                                                                                                                                                                                               |
| tags=100%, list=13%, signal=87% | Tcf4                                                                                                                                                                                                |
| tags=100%, list=13%, signal=87% | Ddx6                                                                                                                                                                                                |
| tags=11%, list=3%, signal=11%   | Hspa1a/Jun/Atf3/Ppp1r15a/Pmaip1                                                                                                                                                                     |
| tags=38%, list=11%, signal=34%  | Hspa1a/Pmaip1/Gpx1/Chchd10/Tspo/Rala                                                                                                                                                                |
| tags=78%, list=30%, signal=55%  | Eif4g2/Bcl2/Snrnp70/Usip36/Herc1/I110ra/Smg1                                                                                                                                                        |
| tags=94%, list=52%, signal=45%  | Pel1/Irch/H2-M3/Tnfrsf8/2/Laptm5/Plpr2/Bank1/Rc3h2/I4ra/H2-Q7/Bcl6/Cd86/Cblb/Inpp5d/Pag1/Smad7                                                                                                      |
| tags=64%, list=22%, signal=50%  | Dnaj1/Hsp90aa1/Timm8b/Hspd1/Tspo/Rala/Ube2j/Fis1/Sae1                                                                                                                                               |
| tags=66%, list=37%, signal=42%  | Bptf/Chd7/Ube3b/Umj1d1c/Kat6a/Rere/Ube4b/Ep300/Ccnd2/Hvep2/Mecp2/Med13/Son/Fbxo1/Ppp1r15b/Kmt2e/Ddx6/Crebbp/Satb1                                                                                   |
| tags=50%, list=1%, signal=50%   | Jun/Fos                                                                                                                                                                                             |
| tags=70%, list=27%, signal=52%  | Eif2ak3/Cttnnb1/Pboxp1/Arid5a/Mef2c/Mef2d/Smad7                                                                                                                                                     |
| tags=75%, list=14%, signal=65%  | Son/Kras/Ganab                                                                                                                                                                                      |
| tags=22%, list=9%, signal=20%   | Dnajb1/Hspa1a/Cited2/Sirt1/Sap18                                                                                                                                                                    |
| tags=57%, list=37%, signal=37%  | Slc12a6/Ujmyd1c/Tbce/Kat6a/Rere/Ube4b/Ep300/Rhf125/Usip7/Ankrd11/Son/Tcrg1/Kras/Zeb2/Tcf12/Ddx6/Crebbp/Herc1/Setd2/Atf4/Wnk1                                                                        |
| tags=57%, list=19%, signal=47%  | Ndufv1/mt-Nd3/mt-Nd1/mt-Nd2                                                                                                                                                                         |
| tags=100%, list=1%, signal=99%  |                                                                                                                                                                                                     |
| tags=67%, list=19%, signal=54%  | Ndufv1/mt-Nd3/mt-Nd1/mt-Nd2                                                                                                                                                                         |
| tags=100%, list=23%, signal=77% | Sirt1/Pcna/Rps3/Npm1                                                                                                                                                                                |
| tags=90%, list=66%, signal=32%  | Kmt2a/Nop56/Gld1/Sec24c/Tnrc6b/Neml/Gd1/Csnk2a1/Nipbl/Chd2/qsec1/Cyflp2/Nsd1/Zfp292/Trip12/Tb1x/Naa15/Herc2/Gns/Vps13a/Ppp3aa/Ankrd17/Atrx/Arid1b/HmnpH2/Arid1a/Smarce1/Filii/Bptf/Chd7/Umj1d1c/Rad |
| tags=10%, list=3%, signal=10%   | Dnajb1/Hspa1a/Hspa8/Hsp90ab1/Capg/Fxyd5                                                                                                                                                             |
| tags=64%, list=37%, signal=41%  | Smarce1/Slc12a6/Ube3b/Umj1d1c/Chn1/Kmt2c/Phip/Phf21a/Hvep2/Son/Fbxo11/Zeb2/Tcf4/Kmt2e/Ddx6/Herc1/Trappc9/Wnk1                                                                                       |
| tags=56%, list=15%, signal=46%  | Med13/Ankrd11/Kmt2e/Ddx6/Satb1                                                                                                                                                                      |
| tags=100%, list=10%, signal=90% | Gpx1/Rpsa                                                                                                                                                                                           |
| tags=64%, list=30%, signal=46%  | Eif4g2/Golga4/Adam10/Ist1/Bcl2/Zfyve27/Mul1/Smad7/Macf1                                                                                                                                             |
| tags=64%, list=30%, signal=46%  | Eif4g2/Golga4/Ist1/Bcl2/Zfyve27/Mul1/Mef2c/Smad7/Macf1                                                                                                                                              |
| tags=75%, list=12%, signal=67%  | S1pr1/Inpp5d/Syk                                                                                                                                                                                    |
| tags=61%, list=23%, signal=48%  | Rps17/Rpl31/Rps26/Rpl18/Rps24/Rps20/Rps7/Rpl35/Rps27/Rpl15/Rps10/Rpl35a/Rps19/Rps28                                                                                                                 |
| tags=50%, list=8%, signal=46%   | Jun/Nr4a1/Myc/Sirt1                                                                                                                                                                                 |
| tags=11%, list=3%, signal=12%   | Hspb1/Jun/Fos/Klf4/Dnaj1a/fd3/Nrkbia/Nr4a1/Chchd2/Myc                                                                                                                                               |
| tags=38%, list=8%, signal=35%   | Hspb1/Gpx1/Sirt1                                                                                                                                                                                    |
| tags=44%, list=10%, signal=40%  | Kmt2e/Mef2c/Kcnq5/Naf                                                                                                                                                                               |
| tags=100%, list=14%, signal=86% | Smchd1                                                                                                                                                                                              |
| tags=100%, list=14%, signal=86% | Mef2c                                                                                                                                                                                               |
| tags=100%, list=14%, signal=86% | Kras                                                                                                                                                                                                |
| tags=100%, list=14%, signal=86% | Kras                                                                                                                                                                                                |
| tags=100%, list=14%, signal=86% | Kras                                                                                                                                                                                                |
| tags=100%, list=14%, signal=86% | Sptbn1                                                                                                                                                                                              |
| tags=67%, list=13%, signal=58%  | Ubb/Myc/Sirt1/Rps7                                                                                                                                                                                  |
| tags=29%, list=8%, signal=27%   | Jun/Fos/Klf10/Myc/Junb/Cited2/Sirt1                                                                                                                                                                 |
| tags=89%, list=38%, signal=55%  | Apoe/Smarce1/Bcl2/H2-Q7/Malt1/Bcl6/Foxp1/Birc3                                                                                                                                                      |
| tags=40%, list=1%, signal=40%   | Hspa1a/Hspa1b                                                                                                                                                                                       |
| tags=75%, list=3%, signal=73%   | Adam10/Hga4/Wnk1                                                                                                                                                                                    |
| tags=75%, list=3%, signal=73%   | Adam10/Hga4/Wnk1                                                                                                                                                                                    |
| tags=100%, list=11%, signal=89% | Cited2/Tspo                                                                                                                                                                                         |
| tags=100%, list=11%, signal=89% | Egr1/Tspo                                                                                                                                                                                           |
| tags=100%, list=11%, signal=89% | Egr1/Tspo                                                                                                                                                                                           |
| tags=100%, list=11%, signal=89% | Egr1/Tspo                                                                                                                                                                                           |
| tags=100%, list=11%, signal=89% | Myc/Tspo                                                                                                                                                                                            |
| tags=100%, list=11%, signal=89% | Myc/Tspo                                                                                                                                                                                            |
| tags=100%, list=11%, signal=89% | Myc/Tspo                                                                                                                                                                                            |
| tags=100%, list=11%, signal=89% | Egr1/Tspo                                                                                                                                                                                           |
| tags=100%, list=24%, signal=76% | Gapdh/Rpl30/Rps19/Rpl39                                                                                                                                                                             |
| tags=100%, list=51%, signal=50% | Rpsa/Eif3k/C1qbp/Tmco1/Serbp1/Ythdf3/Zc3h12a/Naa15/Naa10/Ccdc47                                                                                                                                     |
| tags=100%, list=14%, signal=86% | Herc1                                                                                                                                                                                               |
| tags=100%, list=11%, signal=89% | Traf4/Traf1                                                                                                                                                                                         |
| tags=21%, list=4%, signal=21%   | Jun/Hsp90ab1/Gapdh/Gpx1                                                                                                                                                                             |
| tags=100%, list=1%, signal=99%  |                                                                                                                                                                                                     |
| tags=83%, list=23%, signal=64%  | Hspa1a/Sirt1/Pcna/Rps3/Npm1                                                                                                                                                                         |
| tags=25%, list=8%, signal=23%   | Hspa8/Atf3/Pmaip1/Klf10/Zfp36/Sirt1                                                                                                                                                                 |
| tags=73%, list=27%, signal=55%  | Nhp2/Wdr74/Rpl38/Rpl35/Rpl7a/Rpl24/Pes1/Rpl14/Rpl35a/Npm1/Dhx30                                                                                                                                     |
| tags=27%, list=3%, signal=26%   | Hspa8/Hsp90aa1/Hsp90ab1/Capg                                                                                                                                                                        |
| tags=38%, list=8%, signal=35%   | Hspa1a/Pmaip1/Sirt1                                                                                                                                                                                 |
| tags=64%, list=16%, signal=54%  | Ep300/Nrk2/Son/Kras/Zeb2/Crebbp/Setd2                                                                                                                                                               |
| tags=70%, list=23%, signal=54%  | Rc3h2/I4ra/Malt1/Bcl6/Cd86/Syk/Smad7                                                                                                                                                                |
| tags=19%, list=3%, signal=18%   | Hspa8/Atf3/Fos/Pmaip1/Klf10                                                                                                                                                                         |
| tags=61%, list=37%, signal=39%  | Flt1/Bptf/Xyf1/Chd7/Ube3b/Rad21/Ras2/Ogt/Ubr1/Rere/Phf21a/Ube4b/Wip2/Ep300/Mecp2/Usip7/Ankrd11/Kras/Tcf4/Crebbp/Trappc9/Kdm6b                                                                       |
| tags=12%, list=5%, signal=13%   | Hspa1a/Hspe1/Ppp1r15a/Klf4/Hsp90aa1/Hsp90ab1/Pmaip1/Myc/Pges3/Hspd1/Traf4/Dbi                                                                                                                       |
| tags=75%, list=27%, signal=55%  | Eif2ak3/Cttnnb1/Arid5a/Mef2c/Mef2d/Smad7                                                                                                                                                            |
| tags=75%, list=12%, signal=66%  | Rab43/Ddx6/Vps37b                                                                                                                                                                                   |
| tags=33%, list=12%, signal=30%  | S1pr1/Ano6/Syk/Pde4b/Adgre5/Wnk1                                                                                                                                                                    |
| tags=60%, list=21%, signal=48%  | Pmaip1/Chchd2/Myc/Cited2/Egr1/Sirt1/Eno1/Nfe2l2/Pgk1                                                                                                                                                |
| tags=57%, list=15%, signal=49%  | Med13/Kmt2e/Ddx6/Satb1                                                                                                                                                                              |
| tags=57%, list=15%, signal=49%  | Med13/Kmt2e/Ddx6/Satb1                                                                                                                                                                              |
| tags=75%, list=6%, signal=70%   | Gpx1/Pges3/Egr1                                                                                                                                                                                     |
| tags=100%, list=1%, signal=100% | Hspa8                                                                                                                                                                                               |
| tags=100%, list=30%, signal=71% | Ldb1/Cttnnb1/Pgap1                                                                                                                                                                                  |
| tags=100%, list=12%, signal=88% | Sla/Syk/Cdk1                                                                                                                                                                                        |
| tags=58%, list=23%, signal=45%  | Rps17/Rpl31/Rps26/Rpl18/Rps24/Rps20/Rps7/Rpl35/Rps27/Rpl1d/Rpl15/Rps10/Rpl35a/Rps19/Rps28                                                                                                           |
| tags=12%, list=6%, signal=13%   | Hspa1a/Jun/Hspa8/Atf3/Klf2/Fos/Sertad1/Klf4/Hsp90aa1/Hsp90ab1/Klf6/Nrkbia/Nr4a1/Chchd2/Klf10/Myc/Dazap1/Pges3/Zfp36/Rsf1/Junb/Hmnpab/Cited2/Egr1                                                    |
| tags=58%, list=22%, signal=46%  | Tpp1/Cttnnb1/Tcrg1/S1pr1/Inpp5d/Syk/Mef2c                                                                                                                                                           |
| tags=100%, list=14%, signal=86% | Kdm5a                                                                                                                                                                                               |
| tags=100%, list=14%, signal=86% | Kdm5a                                                                                                                                                                                               |
| tags=100%, list=14%, signal=86% | Pde4b                                                                                                                                                                                               |
| tags=18%, list=5%, signal=18%   | Hspa8/Atf3/Fos/Pmaip1/Klf10/Gpx1/Zfp36                                                                                                                                                              |
| tags=8%, list=3%, signal=8%     | Dnajb1/Hspa1a/Hspa8/Hspa1b/Hsp90aa1/Capg                                                                                                                                                            |
| tags=64%, list=23%, signal=50%  | Rps17/Rpl31/Rps26/Rpl18/Rps24/Rps20/Rps7/Rpl35/Rps27/Rpl15/Rps10/Rpl35a/Rps19/Rps28                                                                                                                 |
| tags=43%, list=6%, signal=41%   | Setd2/Ralgap1/Satb1                                                                                                                                                                                 |
| tags=15%, list=7%, signal=15%   | Jun/Atf3/Klf2/Fos/Sertad1/Klf4/Klf6/Nrkbia/Nr4a1/Chchd2/Klf10/Myc/Rsf1/Junb/Cited2/Egr1/Jund                                                                                                        |
| tags=43%, list=11%, signal=38%  | Hspa1a/Gpx1/Tspo                                                                                                                                                                                    |
| tags=29%, list=1%, signal=29%   | Hspa1a/Hspa1b                                                                                                                                                                                       |
| tags=100%, list=14%, signal=86% | Wnk1                                                                                                                                                                                                |
| tags=15%, list=5%, signal=15%   | Hspb1/Sertad1/Klf4/Dnaj1a/Hsp90aa1/Hsp90ab1/Dusp1/Myc/Pges3/Traf4/Dbi/Zfp36                                                                                                                         |
| tags=12%, list=4%, signal=12%   | Hspa1a/Jun/Hspa1b/Ubb/Hsp90aa1/Hsp90ab1/Gapdh/Pmaip1/Myc/Gpx1/Traf4                                                                                                                                 |
| tags=16%, list=5%, signal=16%   | Hspa1a/Hspa8/Hspa1b/fd3/Nrkbia/Myc/Pges3/Zfp36                                                                                                                                                      |
| tags=100%, list=30%, signal=70% | Dhx36/Smarca5/Sf3b1                                                                                                                                                                                 |
| tags=75%, list=18%, signal=62%  | Birc2/Birc5/Birc3                                                                                                                                                                                   |
| tags=57%, list=13%, signal=50%  | Ubb/Myc/Sirt1/Eif2b2                                                                                                                                                                                |
| tags=43%, list=4%, signal=42%   | Atf3/Pmaip1/Gpx1                                                                                                                                                                                    |
| tags=60%, list=4%, signal=58%   | Mips6/Mpl52/Mips12                                                                                                                                                                                  |
| tags=100%, list=15%, signal=85% | Son                                                                                                                                                                                                 |
| tags=100%, list=15%, signal=85% | Atf4                                                                                                                                                                                                |
| tags=37%, list=14%, signal=32%  | Bcl6/Kras/Akap13/Cdc42ee2/P2ry10/Dennd4a/Cyth1                                                                                                                                                      |
| tags=29%, list=10%, signal=27%  | Hspa1a/Pop1r15a/Pmaip1/Sirt1/Dnajb9                                                                                                                                                                 |
| tags=83%, list=21%, signal=66%  | Dazap1/Junb/Cited2/Bsg/Prdx3                                                                                                                                                                        |
| tags=83%, list=21%, signal=66%  | Dazap1/Junb/Cited2/Bsg/Prdx3                                                                                                                                                                        |
| tags=70%, list=18%, signal=58%  | Stat4/Hhgr1/H2-Q7/Malt1/Foxp1/Bach2/Birc3                                                                                                                                                           |
| tags=100%, list=26%, signal=75% | Tspo/Fis1/Parp1/F1cn                                                                                                                                                                                |
| tags=77%, list=37%, signal=49%  | Bptf/Ogt/Ubr1/Ep300/Med13/Foxp1/Kmt2e/Ddx6/Crebbp/Satb1                                                                                                                                             |
| tags=16%, list=2%, signal=16%   | Hspb1/Klf2/Klf4/Rhob                                                                                                                                                                                |
| tags=15%, list=1%, signal=15%   | Jun/Hspa8                                                                                                                                                                                           |
| tags=50%, list=0%, signal=50%   | Hspa1a                                                                                                                                                                                              |

|                                 |                                                                                                                                                                                                      |
|---------------------------------|------------------------------------------------------------------------------------------------------------------------------------------------------------------------------------------------------|
| tags=30%, list=5%, signal=29%   | Hspa1a/Hspa1b/Zfp36                                                                                                                                                                                  |
| tags=75%, list=28%, signal=54%  | Stat1/Hms1abp/Tcf4/Syk/Bach2/I10ra                                                                                                                                                                   |
| tags=51%, list=24%, signal=40%  | Pop7/Fc11/Rps17/Rps8/Dedd2/Rps24/Nhp2/Rps7/Wdr74/Rpl38/Rpl35/Rps27/Rps21/Rpl7a/Rps16/Rlp24/Pes1/Rpl14/Abt1/Rpl35a/Rps19/Rps28/Npm1/C1qbp                                                             |
| tags=9%, list=2%, signal=10%    | Hspa1a/Hspb1/Hspa1b/Klf2/Klf4/Hsp90aa1/Hsp90ab1/Gapdh                                                                                                                                                |
| tags=13%, list=2%, signal=13%   | Dnaqb1/Hspa8/Hsp90aa1/Hsp90ab1                                                                                                                                                                       |
| tags=13%, list=5%, signal=13%   | Hspb1/Ppp1r15a/Klf4/Hsp90aa1/Hsp90ab1/lid3/Gapdh/Myc/Piges3/Ddb1/Zfp36                                                                                                                               |
| tags=100%, list=1%, signal=99%  |                                                                                                                                                                                                      |
| tags=67%, list=36%, signal=16%  | Chd7/Ube3b/Jmjd1c/Kat5a/Ep300/Kras/Matr3/Sptbn1/Crebbp/Arf4/mt-Cytb/Ralgapa1                                                                                                                         |
| tags=16%, list=2%, signal=16%   | Hspa1a/Hspa1b/Hsp90ab1                                                                                                                                                                               |
| tags=67%, list=37%, signal=43%  | Sic12a6/Cnott1/Kmt2c/Phlp/Phf21a/Hivep2/Fboxo11/Tcf4/Kmt2e/Ddx6/Trappc9/Wnk1                                                                                                                         |
| tags=16%, list=9%, signal=16%   | Hspa1a/Jun/Hspa8/Hspa1b/Klf2/Fos/Hsp90ab1/Nr4a1/Myc/Piges3/Zfp36/Hnmpab/Cited2/Egr1/Sirt1/Lamtor2/Fkbp4/Ube2d1                                                                                       |
| tags=12%, list=4%, signal=12%   | Hspa1a/Hspe1/Ppp1r15a/Hsp90ab1/Pmaip1/Myc/Hspd1                                                                                                                                                      |
| tags=50%, list=0%, signal=50%   | Hspb1                                                                                                                                                                                                |
| tags=40%, list=8%, signal=37%   | Ano6/Kcnq5/mt-Atp6/mt-Atp8                                                                                                                                                                           |
| tags=67%, list=1%, signal=66%   | Klf2/Klf4                                                                                                                                                                                            |
| tags=51%, list=23%, signal=41%  | Pop7/Fc11/Rps17/Rps8/Dedd2/Rps24/Nhp2/Rps7/Wdr74/Rpl35/Rps27/Rps21/Rpl7a/Rps16/Pes1/Rpl14/Abt1/Rpl35a/Rps19/Rps28                                                                                    |
| tags=65%, list=51%, signal=35%  | Tfam/Plpcc/Lmbrd1/Ich/Gns/Cd55/Cdc47/Vps13a/Pstpip1/Atrx/Arid1b/Mrps7/Paap/Epib41/Hadha/Cd81/Arid1a/Plekhh1/Dpm1/Plen/Pex7/Apoe/Ptgn2/Smarce1/Xylt1/Chd7/Stk11/Jmjd1c/Rasa2/Cnott1/Ubr1/Jak1/Polg/Rh |
| tags=75%, list=16%, signal=64%  | Pde7a/Nei1/Pde4b                                                                                                                                                                                     |
| tags=60%, list=23%, signal=47%  | Rc3h2/Ik4a/Bcl2/Malt1/Bcl6/Foxp1/Cd86/Syk/Smad7                                                                                                                                                      |
| tags=67%, list=2%, signal=65%   | Hspb1/Nr4a1                                                                                                                                                                                          |
| tags=43%, list=12%, signal=38%  | S1pr1/Igta4/Wnk1                                                                                                                                                                                     |
| tags=14%, list=5%, signal=14%   | Hspa1a/Hspa1b/Klf2/Fos/Klf4/Hsp90ab1/Nfkb1a/Gapdh/Cacybp/Dusp1/Myc/Zfp36/Actg1                                                                                                                       |
| tags=38%, list=11%, signal=34%  | Dnaqb1/Sirt1/Ahsa1                                                                                                                                                                                   |
| tags=10%, list=5%, signal=11%   | Hspa1a/Hspe1/Hspa8/Hspa1b/Dnaja1/Rasd1/Hsp90aa1/Hsp90ab1/Tubb5/Rhob/Tuba1a/Hspd1/Rrad/Ddb1/Actg1                                                                                                     |
| tags=60%, list=12%, signal=53%  | Akap13/Mef2c/Kdm6b                                                                                                                                                                                   |
| tags=80%, list=23%, signal=62%  | Ilf4a/Cd84/Syk/Adgre5                                                                                                                                                                                |
| tags=11%, list=2%, signal=12%   | Hspa1a/Hspa8/Hspa1b/Hsp90ab1                                                                                                                                                                         |
| tags=15%, list=4%, signal=15%   | Hspa8/Dnaja1/Hsp90aa1/Hsp90ab1/Nfkb1a/Timm8b/Hspd1                                                                                                                                                   |
| tags=17%, list=8%, signal=16%   | Hspa1a/Hspb1/Hspa1b/Hsp90aa1/Gapdh/Hspd1/Egr1/Gpsm3/Sirt1                                                                                                                                            |
| tags=67%, list=3%, signal=65%   | Ubb/Myc                                                                                                                                                                                              |
| tags=75%, list=18%, signal=62%  | Nfkb1/Tcig1/Bach2                                                                                                                                                                                    |
| tags=35%, list=15%, signal=32%  | Rc3h2/Ik4a/Bcl2/Ppp1/Cr1/H2-Q7/Cd2/Peid2/Malt1/Bcl6/Foxp1/Fbox38/Dhx36/Matr3/Cd86/Cd84/Cblb/Sh3kbp1/npp5d/Ano6/Crebbp/Arid5a/lkbkb/Syk/Mef2c/Acin1/Igta4/Irs2/Pde4b/Adgre5/Wnk1                      |
| tags=100%, list=1%, signal=99%  |                                                                                                                                                                                                      |
| tags=61%, list=23%, signal=48%  | Rps17/Rpl31/Rps26/Rpl18/Rps24/Rps20/Rps7/Rpl35/Rps27/Rpl15/Rps10/Rpl35a/Rps19/Rps28                                                                                                                  |
| tags=100%, list=54%, signal=47% | Chd4/Kdm6a/Tox4/Foxo1/Smarce1/Sbno1/Jmjd1c/Per1/Ep300/Sbnc2/Bcl6/Crebbp/Kdm5a/Kdm6b                                                                                                                  |
| tags=11%, list=4%, signal=11%   | Hspa1a/Hspb1/Atf3/Dnaja1/Dusp1/Myc/Gpx1                                                                                                                                                              |
| tags=18%, list=3%, signal=18%   | Hspa1a/Hspa1b/Hsp90aa1/Capp                                                                                                                                                                          |
| tags=58%, list=23%, signal=45%  | Rps17/Rpl31/Rps26/Rpl18/Map2k1/Rps24/Rps20/Rps7/Rpl35/Rps27/Rpl15/Rps10/Rpl35a/Rps19/Rps28                                                                                                           |
| tags=38%, list=20%, signal=31%  | Mecp2/H2-Q7/Usp7/Med13/Ankrd11/Son/Kras/Atad1/Sptbn1/Ubr1/Ppp1r15b/Kmt2e/Ddx6/Cftr/Herc1/Setd2/Satb1                                                                                                 |
| tags=82%, list=40%, signal=50%  | Dnm2/Apoe/Ef4g2/Golga4/Ist1/Rnf6/Zfyve27/Dlp2b/Macf1                                                                                                                                                 |
| tags=14%, list=3%, signal=14%   | Hspa1a/Hspa1b/Tubb5/Gapdh/Tuba1a                                                                                                                                                                     |
| tags=67%, list=3%, signal=65%   | Jun/Myc                                                                                                                                                                                              |
| tags=19%, list=4%, signal=19%   | Hspa1a/Hspa1b/Nfkb1a/Hspd1                                                                                                                                                                           |
| tags=23%, list=2%, signal=23%   | Hspa1a/Hspa1b/Nfkb1a                                                                                                                                                                                 |
| tags=100%, list=14%, signal=86% | Fth1/Cybb561a3                                                                                                                                                                                       |
| tags=100%, list=1%, signal=99%  | Ppp1r15a                                                                                                                                                                                             |
| tags=43%, list=8%, signal=40%   | Hspa1a/Pmaip1/Chchd10                                                                                                                                                                                |
| tags=86%, list=39%, signal=53%  | Inpp5k/Foxo1/Ptpn2/Stk11/Ogt/Citc/Plek/Ranbp2/Ep300/Nfkb1/Usp7/Irs2                                                                                                                                  |
| tags=62%, list=24%, signal=48%  | Ubb/Rps17/Rpl31/Rps26/Rpl18/Rps24/Rps20/Rps7/Rpl35/Rps27/Rpl15/Rps10/Rpl35a/Rps19/Rps28/Bim1                                                                                                         |
| tags=45%, list=23%, signal=36%  | Rc3h2/Ik4a/Cr1/H2-Q7/Nfkb2/Malt1/Bcl6/Tcig1/Fbox38/npp5d/Arid5a/Mef2c/Bach2/Smad7                                                                                                                    |
| tags=75%, list=20%, signal=60%  | Polg/Mecp2/Ndufv1/mt-Nd3/mt-Nd1/mt-Nd2                                                                                                                                                               |
| tags=75%, list=20%, signal=60%  | Polg/Mecp2/Ndufv1/mt-Nd3/mt-Nd1/mt-Nd2                                                                                                                                                               |
| tags=33%, list=7%, signal=32%   | Ahnak/Mef2c/Cab39/Pde4b/Wnk1                                                                                                                                                                         |
| tags=33%, list=1%, signal=33%   | Hspa1a/Hspa1b                                                                                                                                                                                        |
| tags=55%, list=37%, signal=36%  | Sic12a6/Jmjd1c/Ubr1/Tbce/Kat5a/Rere/Ube4b/Ep300/Rnf125/Usp7/Ankrd11/Son/Tcig1/Kras/Zeb2/Tcf12/Sptbn1/Ddx6/Crebbp/Herc1/Setd2/Arf4/Wnk1                                                               |
| tags=28%, list=18%, signal=25%  | Irfnrg1/H2-Q7/Nfkb1/Ankrd11/Malt1/Tcig1/Foxp1/Zeb2/Atad1/Sptbn1/Tcf4/Sh3kbp1/mt-Nd4/Ganab/Crebbp/lkbkb/Syk/Setd2/Bach2/Sf3b1/Arf4/Birc3/I10ra/mt-Nd1/mt-Co1/mt-Co3/mt-Co2/mt-Nd5/mt-Nd6              |
| tags=100%, list=14%, signal=86% | Rps20/Rpl37                                                                                                                                                                                          |
| tags=67%, list=15%, signal=57%  | Ep300/Med13/Kmt2e/Ddx6/Crebbp/Satb1                                                                                                                                                                  |
| tags=89%, list=57%, signal=39%  | Zfp292/Trip12/Zfp148/Chd4/Donson/Ehmt1/Herc2/Lmnb1/Ankrd17/Atrx/Arid1b/Pex7/Copt2/Flii/Bptf/Ube3b/Jmjd1c/Citc/Phlp/Rere/EifI2a3/Ep300/Mnpp1/Mecp2/Ankrd11/Sptbn1/Tcf4/Crebbp/Herc1/Mef2c/Pgap1       |
| tags=62%, list=21%, signal=50%  | Rnf125/Usp15/Birc2/Birc3/Tim25                                                                                                                                                                       |
| tags=21%, list=8%, signal=20%   | mt-Nd4/mt-Nd3/mt-Cytb/mt-Nd1/mt-Co1/mt-Co3/mt-Nd2/mt-Co2/mt-Nd5/mt-Nd6                                                                                                                               |
| tags=45%, list=15%, signal=39%  | Ankrd11/Ppp1r15b/Arf4/Trappc9/Kdm6b                                                                                                                                                                  |
| tags=50%, list=15%, signal=43%  | Med13/Kmt2e/Ddx6/Mef2c/Satb1                                                                                                                                                                         |
| tags=14%, list=7%, signal=14%   | Hspa1a/Hspa8/Hspa1b/Fos/Nr4a1/Myc/Gpx1/Piges3/Zfp36/Cited2/Egr1/Jund                                                                                                                                 |
| tags=100%, list=1%, signal=99%  | Klf2                                                                                                                                                                                                 |
| tags=100%, list=1%, signal=99%  | Klf2                                                                                                                                                                                                 |
| tags=100%, list=1%, signal=99%  | Klf2                                                                                                                                                                                                 |
| tags=48%, list=23%, signal=38%  | Hspb1/Ppp1r15a/Rps17/Rps5/Eif9/Eif2b2/Eif3k/Rpl13a/Eif1ax/Eif1/Eif3e/Rps3/Npm1                                                                                                                       |
| tags=10%, list=4%, signal=11%   | Hspa1a/Hspb1/Hspa1b/Fos/Klf4/Hsp90aa1/Rhob/Gapdh/Nfkbid/Klf10/Myc/Hspd1                                                                                                                              |
| tags=21%, list=12%, signal=20%  | Hspa1a/Hspa8/Hspa1b/Hsp90aa1/Hsp90ab1/Tubb5/Hspd1/Fth1/Dynl11/Ftll1/Syng2/Lamtor2/Man2b1/Rap1a/Oatf1/Plekho2/Vapa                                                                                    |
| tags=64%, list=37%, signal=41%  | Bptf/Stk11/Ubr1/Phlp/Rere/Tmem127/Ube4b/Ep300/H2-Q7/Med13/Kras/Kmt2e/Ddx6/Crebbp/Satb1/Kdm6b                                                                                                         |
| tags=42%, list=17%, signal=35%  | Hspa1a/Hsp90aa1/Pmaip1/Timm8b/Hspd1/Chchd10/Tspo/Atps6/Atpsc1/Ube2j2                                                                                                                                 |
| tags=100%, list=1%, signal=99%  |                                                                                                                                                                                                      |
| tags=100%, list=1%, signal=99%  |                                                                                                                                                                                                      |
| tags=21%, list=2%, signal=21%   | Hspa1a/Hspa1b/Nfkb1a                                                                                                                                                                                 |
| tags=11%, list=3%, signal=11%   | Hspa1a/Hspa1b/Hsp90aa1/Capp                                                                                                                                                                          |
| tags=100%, list=14%, signal=86% | Ecd/Alch2                                                                                                                                                                                            |
| tags=100%, list=14%, signal=86% | Azin1/Alch2                                                                                                                                                                                          |
| tags=55%, list=27%, signal=41%  | Ldb1/Ildr1/Bcl2/Ctrmb1/Ptpri/Mecp2/Myo1c/lkbkb/Mef2c/Smad7/Macf1                                                                                                                                     |
| tags=38%, list=8%, signal=35%   | Hspa1a/Pmaip1/Chchd10                                                                                                                                                                                |
| tags=15%, list=3%, signal=15%   | Hspa1a/Hspa1b/Capp                                                                                                                                                                                   |
| tags=16%, list=3%, signal=16%   | Hspa8/Atf3/Fos/Pmaip1/Klf10                                                                                                                                                                          |
| tags=40%, list=24%, signal=32%  | Sbno2/Rc3h2/Ik4a/Ptpri/Cr1/Dock2/H2-Q7/Cebpg/Malt1/Bcl6/Tcig1/Foxp1/Fbox38/Dhx36/Cd86/Cd84/Kmt2e/npp5d/Arid5a/Syk/Smad7/Adgre5                                                                       |
| tags=30%, list=9%, signal=28%   | Jun/Nr4a1/Myc/Gpx1/Zfp36/Sirt1/Map2k1                                                                                                                                                                |
| tags=100%, list=14%, signal=86% | Hspa8/Vamp2                                                                                                                                                                                          |
| tags=100%, list=14%, signal=86% | Hspa8/Vamp2                                                                                                                                                                                          |
| tags=80%, list=19%, signal=65%  | Usp16/Usp15/Usp7/Sup20                                                                                                                                                                               |
| tags=20%, list=4%, signal=20%   | Hspa1a/Hspa1b/Gpx1                                                                                                                                                                                   |
| tags=38%, list=8%, signal=35%   | Ano6/Igta4/Wnk1                                                                                                                                                                                      |
| tags=50%, list=11%, signal=45%  | Hsp90aa1/Hsp90ab1/Piges3/Nhp2                                                                                                                                                                        |
| tags=25%, list=1%, signal=25%   | Jun/Fos                                                                                                                                                                                              |
| tags=34%, list=15%, signal=30%  | Med13/Son/Foxp1/Kmt2e/Ddx6/Crebbp/Herc1/Setd2/Satb1/Kdm6b                                                                                                                                            |
| tags=62%, list=23%, signal=48%  | Ilf4a/H2-Q7/Peid2/Malt1/Bcl6/Cd86/npp5d/Syk                                                                                                                                                          |
| tags=85%, list=56%, signal=38%  | Ubr4/Trip12/Arhb2/Tim11/Rabgef1/Pel1/Rnf34/Herc2/Ich/Brap/Ube3b/Znrf2/Ubr1/Ranbp2/Ube4b/Rnf6/Rc3h2/Rnf213/Rnf125/Chfr/Mycbp2/Birc2/Htt/Mu1/Anh1/Neur3/Cblb/Birc3/Timc25                              |
| tags=70%, list=32%, signal=48%  | Lmd1/Eif4g2/Adam10/Ctrmb1/Tmod3/Smad7/Cyht1                                                                                                                                                          |
| tags=60%, list=15%, signal=51%  | Ep300/Med13/Kmt2e/Ddx6/Crebbp/Satb1                                                                                                                                                                  |
| tags=50%, list=15%, signal=43%  | Med13/Kmt2e/Ddx6/Herc1/Satb1                                                                                                                                                                         |
| tags=50%, list=15%, signal=43%  | Med13/Ppp1r15b/Kmt2e/Ddx6/Satb1                                                                                                                                                                      |
| tags=80%, list=36%, signal=51%  | Chd7/Ube3b/Jmjd1c/Kat5a/Ep300/Crebbp/Arf4/Ralgapa1                                                                                                                                                   |
| tags=62%, list=22%, signal=49%  | Tpp1/Mecp2/Zeb2/Sptbn1/Ppp1r15b                                                                                                                                                                      |
| tags=42%, list=12%, signal=37%  | Akap13/S1pr1/Mef2c/Smad7/Kdm6b                                                                                                                                                                       |
| tags=78%, list=41%, signal=47%  | Pten/Dnm2/Apoe/Sic12a6/Rb1cc1/Plek/Eif4g2/Golga4/Ist1/Rnf6/Zfyve27/Ano6/Dlp2b/Macf1                                                                                                                  |
| tags=73%, list=3%, signal=72%   | Inpp5k/Atf2/Pkcb/Stk11/Hipk3/Bcl2/Camk2d/Clk1/Cab39/Smad7/Wnk1                                                                                                                                       |
| tags=53%, list=23%, signal=41%  | Ilf4a/Bcl2/Kras/Spag9/Akap13/Plekho1/Cftr/Tmod3/Mef2c/Kdm6b                                                                                                                                          |
| tags=67%, list=19%, signal=54%  | Krfl1/H2-Q7/Ano6/Igta4                                                                                                                                                                               |
| tags=17%, list=5%, signal=17%   | Hspa1a/Hspa1b/Dusp1/Naa50                                                                                                                                                                            |
| tags=80%, list=23%, signal=62%  | Rc3h2/Ik4a/Bcl6/Smad7                                                                                                                                                                                |
| tags=12%, list=3%, signal=12%   | Dnaqb1/Marcksl1/Ubb/Hsp90aa1/Hsp90ab1/lid3/Capp/Myc                                                                                                                                                  |
| tags=80%, list=27%, signal=59%  | Atp6v0a1/Tcig1/mt-Atp6/mt-Atp8                                                                                                                                                                       |
| tags=37%, list=21%, signal=30%  | Ctrnb1/Hivep2/Mecp2/Sars/Cux1/Med13/Foxp1/Tcf4/Kmt2e/Ddx6/Kcnq5/Setd2/mt-Atp6/Pgap1/Satb1/Trappc9                                                                                                    |
| tags=12%, list=2%, signal=13%   | Hspa1a/Hspa1b/Hsp90aa1                                                                                                                                                                               |
| tags=69%, list=32%, signal=47%  | Tbce/Rere/Ube4b/Ep300/Rnf125/Usp7/Ankrd11/Ddx6/Crebbp                                                                                                                                                |
| tags=38%, list=11%, signal=34%  | Jun/Map2k1/Rap1a                                                                                                                                                                                     |
| tags=29%, list=11%, signal=27%  | Jun/Atf3/Myc/Map2k1/Rap1a                                                                                                                                                                            |
| tags=18%, list=5%, signal=18%   | Hspa1a/Hspa1b/Fos/Nfkb1a/Nfkbid/Klf10/Myc/Zfp36                                                                                                                                                      |
| tags=78%, list=44%, signal=44%  | Hadha/Pten/ApoexXylt1/Chd7/Ube3b/Rere/Ep300/Ctrnb1/Krnl1/H2-Q7/Zeb2/Sptbn1/Crebbp                                                                                                                    |
| tags=9%, list=4%, signal=9%     | Hspa1a/Hspb1/Hspa1b/Atf3/Ppp1r15a/Dnaja1/Nfkb1a/Dusp1/Myc/Gpx1                                                                                                                                       |
| tags=50%, list=13%, signal=44%  | Ubb/Myc/Sirt1/Eif2b2                                                                                                                                                                                 |
| tags=20%, list=4%, signal=20%   | Hspa8/Hsp90aa1/Hsp90ab1/Nfkb1a/Hspd1                                                                                                                                                                 |
| tags=18%, list=11%, signal=18%  | Hspa1a/Jun/Hspa8/Hspa1b/Klf2/Fos/Hsp90ab1/Nr4a1/Myc/Gpx1/Piges3/Zfp36/Hnmpab/Cited2/Egr1/Jund/Sirt1/Lamtor2/Fkbp4/Ube2d1/Rap1a/Her2/Tspo                                                             |
| tags=33%, list=3%, signal=32%   | Igta4/Wnk1                                                                                                                                                                                           |
| tags=62%, list=26%, signal=47%  | Rps17/Rpl31/Rps26/Rpl18/Map2k1/Rps24/Rps20/Rps7/Rpl35/Rps27/Rpl15/Rps10/Rpl35a/Rps19/Rps28/Fcn                                                                                                       |
| tags=100%, list=15%, signal=85% | Egr1/Pcna                                                                                                                                                                                            |
| tags=100%, list=15%, signal=85% | Bcl11a/Pcna                                                                                                                                                                                          |
| tags=52%, list=25%, signal=40%  | Ep300/Ceif2/Hivep2/Sars/Fus/Usp7/Sptbn1/Ubr1/Crebbp/Pgap1/Trappc9                                                                                                                                    |
| tags=100%, list=2%, signal=99%  |                                                                                                                                                                                                      |
| tags=100%, list=1%, signal=99%  |                                                                                                                                                                                                      |

|                                 |                                                                                                                                                                                                        |
|---------------------------------|--------------------------------------------------------------------------------------------------------------------------------------------------------------------------------------------------------|
| tags=100%, list=1%, signal=99%  |                                                                                                                                                                                                        |
| tags=24%, list=15%, signal=23%  | Med13/Ankrd11/Son/Tcirg1/Foxp1/Kras/Fbxo11/Zeb2/Tcf12/Sptbn1/Ppp1r15b/Kmt2e/Ddx6/mt-Nd4/Crebbp/Herc1/Mef2c/Setd2/Aff4/Smchd1/Ralgapa1/Pgap1/mt-Nd1/mt-Co1/mt-Co3/mt-Co2/Satb1/mt-Nd5/Trappc9/mt-I      |
| tags=64%, list=51%, signal=35%  | Herc2/Ictb/Kdm6a/Ccdc47/Lmnb1/Ppp3ca/Ankrd17/Erlin1/Atx/Artd1b/HnmpH2/Inpp5k/Sbf1/Mbtpe1/Artd1a/Pten/Pex7/Dnm2/Smarce1/Filii/Bptf/Slc12a6/Kytl1/Chd7/Nacc1/Umjrd1c/Rasa2/Ctcf/Rere/Ube4b/Zm            |
| tags=53%, list=42%, signal=34%  | Artd1a/Dpm1/Pten/Tdp2/Dnm2/Bptf/Slc12a6/Ube3b/Nacc1/Cnot1/Ubr1/Ctcf/Ppp2ca/Kmt2c/Tbce/Php/Kat5a/Polg/Rere/PH21a/Ogdh/Ep300/Cell2/Ctnnb1/Rnf125/Chd1/Hivsp2/Sars/Polr2a/Ndufv1/Usp7/Cux1/Foxp1/Fbx      |
| tags=62%, list=28%, signal=45%  | Stat4/Ep300/H2-Q7/Son/Kras/Zeb2/Sptbn1/Crebbp                                                                                                                                                          |
| tags=53%, list=39%, signal=35%  | Foxo1/G3bp1/Apoe/Prkcb/Slc12a6/Chd7/Skt11/Rtf1/Ppp2ca/Limd1/Paf1/Chd6/BtbD9/Ldb1/Adam10/Zdhhc3/Ildr1/Rnf213/Ctnnb1/Zranb1/Mecp2/Csnk1g3/Nkx1/Fbx/20/Tcirg1/Kras/Zeb2/Atad1/Pboxp1/Sh3kbp1/P            |
| tags=65%, list=39%, signal=40%  | Prp18/Filii/Bptf/Chd7/Umjrd1c/Rad21/Cnot1/Hax1/Rere/Tmem127/Ube4b/Ep300/H2-Q7/Med13/Ankrd11/Kmt2e/Ddx6/Crebbp/Setd2/Aff4/Smchd1/Satb1                                                                  |
| tags=56%, list=19%, signal=45%  | Csnk1d/Csnk1g3/Nkx1/Zeb2/Wnk1                                                                                                                                                                          |
| tags=65%, list=23%, signal=51%  | Rps17/Rpl31/Rps26/Rpl18/Rps24/Rps20/Eif2b2/Rps7/Ndufsa/Rpl35/Rps27/Rpl15/Rps10/Rpl35a/Rps19/Rps28/Ndufs8                                                                                               |
| tags=18%, list=3%, signal=18%   | Hspa8/Atf3/Pmaip1/Klf10                                                                                                                                                                                |
| tags=42%, list=21%, signal=34%  | Hivep2/Mecp2/Cux1/NfkB2/Son/Zeb2/Tcf4/Kcnq5/Setd2/Pgap1/Satb1                                                                                                                                          |
| tags=9%, list=4%, signal=10%    | Dnajb1/Hspb1/Jun/Ppp1r15a/Dnaj1/Hsp90aa1/Hsp90ab1/Iid3/Gapdh/Fxyd5/Azin1/Rad                                                                                                                           |
| tags=12%, list=2%, signal=12%   | Hspa1a/Hspa1b/Klf4/Iid3/Nkfbia                                                                                                                                                                         |
| tags=15%, list=6%, signal=15%   | Hspb1/Jun/Klf2/Klf4/Rhob/Nkx1/Dusp1/Gpx1/Actg1/Junb/Cited2                                                                                                                                             |
| tags=67%, list=39%, signal=42%  | Tatf15/Chd7/Ube3b/Jmyd1c/Kat5a/Ep300/Fus/Kras/Matn3/Sptbn1/Crebbp/Aff4/mt-Cytb/Ralgapa1                                                                                                                |
| tags=43%, list=23%, signal=34%  | Cell2/Mecp2/Sars/Atad1/Sptbn1/Pgap1/Satb1/Trappc9/Naf                                                                                                                                                  |
| tags=25%, list=7%, signal=24%   | Jun/AH3/Fos/Myc/Junb/Hnmpab/Jund                                                                                                                                                                       |
| tags=56%, list=15%, signal=48%  | Bank1/Bcl2/Pcd2/Bcl6/Sh3kbp1/hnpp5d/Syk/Mef2c/Irs2                                                                                                                                                     |
| tags=100%, list=16%, signal=85% | Pde4b                                                                                                                                                                                                  |
| tags=73%, list=44%, signal=42%  | HadhavN3c1/Tdp2/Chd7/Umjrd1c/Ubr1/Tbce/Tmem127/Eif2ak3/Nkx2/Tcirg1/Foxp1/Kras/Syk/Setd2/Wnk1                                                                                                           |
| tags=57%, list=26%, signal=43%  | Rps17/Umps/Rpl31/Rps26/Rpl18/Rps24/Rps20/Rps7/Rpl35/Rps10/Rpl35a/Rps19/Rps28/H2-Ab1                                                                                                                    |
| tags=100%, list=15%, signal=85% | Dbp/Mboat7                                                                                                                                                                                             |
| tags=100%, list=16%, signal=85% | Ubb/Polr1d                                                                                                                                                                                             |
| tags=24%, list=6%, signal=23%   | Hspa1a/Hspa1b/Klf2/Zfp36/Rps17/Cited2                                                                                                                                                                  |
| tags=11%, list=3%, signal=11%   | Hspa1a/Hspb1/Hspa1b/Klf2/Fos/Klf4/Rhob/Nkfbia/Nkbid/Klf10/Myc                                                                                                                                          |
| tags=57%, list=42%, signal=35%  | Artd1a/Pten/Dnm2/Prp18/Smarce1/Bptf/Chd7/Skt11/Umjrd1c/Rad21/Rasa2/Ogt/Ubr1/Tbce/Php/Kat5a/Polg/Rere/Ube4b/Stat4/Ep300/Minnp1/Mecp2/H2-Q7/Usp7/Med13/Ankrd11/Kras/Zeb2/Ppp1r15b/Tcf4/Kmt2e/Ddx6/C      |
| tags=50%, list=17%, signal=42%  | Usp7/Med13/Son/Kmt2e/Ddx6/Satb1                                                                                                                                                                        |
| tags=64%, list=42%, signal=38%  | Snrw1/Artd1a/Brd9/Smarce1/Nucks1/Prkcb/Ets1/Kmt2c/Kat5a/Rere/Cebpa/Ep300/Daxx/Ctnnb1/Usp16/Fus/Birc2/Ncoa2/Med13/Pboxp1/Crebbp/Kdm5a/Trim25                                                            |
| tags=17%, list=6%, signal=17%   | Jun/Klf2/Klf4/Tubb5/Rhob/Ik3/Myc/Gpx1/Zfp36/Actg1/Cited2                                                                                                                                               |
| tags=50%, list=15%, signal=43%  | Hspa8/Actg1/Vamp2/Mica1                                                                                                                                                                                |
| tags=100%, list=52%, signal=48% | Rps26/Rps28/Sec3/Uba1/Suco/Zc3h12a/Ccdc47/Arf6p1                                                                                                                                                       |
| tags=57%, list=20%, signal=46%  | Sars/Zeb2/Pgap1/Trappc9                                                                                                                                                                                |
| tags=100%, list=1%, signal=99%  | Ubb                                                                                                                                                                                                    |
| tags=100%, list=1%, signal=99%  | Fos                                                                                                                                                                                                    |
| tags=100%, list=1%, signal=99%  | Fos                                                                                                                                                                                                    |
| tags=100%, list=1%, signal=99%  | Fos                                                                                                                                                                                                    |
| tags=100%, list=1%, signal=99%  | Ubb                                                                                                                                                                                                    |
| tags=100%, list=1%, signal=99%  | Fos                                                                                                                                                                                                    |
| tags=100%, list=1%, signal=99%  | Fos                                                                                                                                                                                                    |
| tags=100%, list=1%, signal=99%  | Fos                                                                                                                                                                                                    |
| tags=100%, list=1%, signal=99%  | Ubb                                                                                                                                                                                                    |
| tags=14%, list=0%, signal=14%   | Dnajb1                                                                                                                                                                                                 |
| tags=53%, list=37%, signal=35%  | Smarce1/Bptf/Chd7/Umjrd1c/Rad21/Rasa2/Ogt/Ubr1/Tbce/Php/Kat5a/Rere/Ube4b/Ep300/Minnp1/Mecp2/Usp7/Med13/Ankrd11/Kras/Zeb2/Ppp1r15b/Tcf4/Kmt2e/Ddx6/Crebbp/Setd2/Stt3b/Aff4/Smchd1/Satb1/Kdm6b           |
| tags=100%, list=16%, signal=84% | Klf21b                                                                                                                                                                                                 |
| tags=14%, list=4%, signal=14%   | Hspa1a/Hspa1b/Ubb/Hsp90aa1/Hsp90ab1/Gpx1/Azin1                                                                                                                                                         |
| tags=25%, list=15%, signal=23%  | Ankrd11/Son/Tcirg1/Kras/Zeb2/Sptbn1/Crebbp/Setd2/Aff4/mt-Cytb/mt-Nd1/mt-Co1/mt-Co3/mt-Co2/Satb1/mt-Nd5/mt-Nd6                                                                                          |
| tags=100%, list=23%, signal=77% | Artd5a/Dip2b                                                                                                                                                                                           |
| tags=100%, list=23%, signal=77% | Artd5a/Dip2b                                                                                                                                                                                           |
| tags=50%, list=6%, signal=47%   | Ndufv1/mt-Nd3/mt-Nd1/mt-Nd2                                                                                                                                                                            |
| tags=88%, list=40%, signal=53%  | Dnm2/Apoe/Xylt1/Ranbp2/Ctnnb1/Zeb2/Stf3b1                                                                                                                                                              |
| tags=60%, list=3%, signal=58%   | Adam10/Igfa4/Wnk1                                                                                                                                                                                      |
| tags=14%, list=1%, signal=14%   | Hspa1a/Hspa1b                                                                                                                                                                                          |
| tags=27%, list=18%, signal=24%  | H2-Q7/Nkx1/Nkx2/Med13/Son/Tcirg1/Kras/Zeb2/Sptbn1/Ppp1r15b/Tcf4/Kmt2e/Ddx6/mt-Nd4/Ganab/Crebbp/Syk/Setd2/mt-Atp6/Aff4/mt-Cytb/mt-Nd1/mt-Co3/mt-Nd2/Satb1/mt-Nd5/mt-Nd4/mt-Nd6                          |
| tags=78%, list=56%, signal=36%  | Ubr4/Fbx3/Trip12/Arh2/Trim11/Rabgefr1/Pell1/Rnf34/Herc2/Ictv/Cu15/Brap/Ube2g1/Ube2b/Ube3b/Znrf2/Ubr1/Ranbp2/Ube4b/Rnf6/Zfp91/Pml/Rc3h2/Rnf213/Rnf125/Chfr/Mycbp2/Birc2/Htf/Mu1/Malt1/Fbxo11/Arh1/Neurt |
| tags=38%, list=23%, signal=31%  | Cell2/Tpp1/Mecp2/Polr2a/Fus/Fbxo38/Matn3/Ddx6/mt-Nd4/Herc1/mt-Atp6/mt-Cytb/Pgap1/mt-Nd1/mt-Co1/mt-Co3/mt-Co2/mt-Nd5/mt-Nd6                                                                             |
| tags=30%, list=6%, signal=28%   | Syk/Pde4b/Adgre5                                                                                                                                                                                       |
| tags=50%, list=6%, signal=47%   | Kcnq5/Pde4b                                                                                                                                                                                            |
| tags=50%, list=2%, signal=49%   | Hspa8/Hsp90aa1                                                                                                                                                                                         |
| tags=22%, list=12%, signal=20%  | Hspa1a/Hspa8/Hspa1b/Hsp90aa1/Hsp90ab1/Tubb5/Hspd1/Fth1/Dynl1/Fhl1/Lamtor2/Man2b1/Rap1a/Oatf1/Plkhd02/Vapa                                                                                              |
| tags=56%, list=19%, signal=45%  | Krtf1/Ndufv1/mt-Nd3/mt-Nd1/mt-Nd2                                                                                                                                                                      |
| tags=100%, list=16%, signal=84% | Inpp5d                                                                                                                                                                                                 |
| tags=100%, list=16%, signal=84% | Arnt                                                                                                                                                                                                   |
| tags=100%, list=16%, signal=84% | Bcl6                                                                                                                                                                                                   |
| tags=100%, list=16%, signal=84% | Ppp1r15b                                                                                                                                                                                               |
| tags=60%, list=40%, signal=37%  | Dnm2/Apoe/Rasa2/Ogt/Arhgap26/Ralgs22/Arhgap30/Arhgap15/Arhgap25/Dock2/Bcl6/Kras/Akap13/Cdc42se2/Ralgapa1/P2ry10/Dennd4a/Cytl1                                                                          |
| tags=42%, list=21%, signal=34%  | Hivep2/Mecp2/Sars/Cux1/Ankrd11/Foxp1/Tcf4/Kcnq5/Setd2/Pgap1/Trappc9                                                                                                                                    |
| tags=83%, list=54%, signal=39%  | Zbtb20/Naa10/Ehmt11/Herc2/Vps13a/Ppp3ca/Atxv/HnmpH2/Filii/Ctcf/Kmt2c/Rere/Ube4b/Zmynd11/Ep300/Ctnnb1/Hivep2/Usp7/Cux1/Foxp1/Tcf4/Kmt2a/Crebbp/Kcnq5                                                    |
| tags=56%, list=17%, signal=47%  | Prpla7/Pde7a/Neil1/Gpcpd1/Pde4b                                                                                                                                                                        |
| tags=43%, list=23%, signal=34%  | Pml/Bcl2/Ctnnb1/Camk2d/Cd84/Diaph1/Ano6/Ahnak/Cab39/Atp2b1/Pde4b/Wnk1                                                                                                                                  |
| tags=57%, list=14%, signal=49%  | Malt1/Foxp1/Syk/Birc3                                                                                                                                                                                  |
| tags=100%, list=23%, signal=77% | Hspa1a/Pcna/Rps3                                                                                                                                                                                       |
| tags=100%, list=23%, signal=77% | Mrp66/Rps13/Rps3                                                                                                                                                                                       |
| tags=48%, list=23%, signal=38%  | Rc3h2/Ikfa/Bcl2/Dock2/H2-Q7/Malt1/Bcl6/Tcirg1/Foxp1/Cd86/Ctcf/Syk/Smad7                                                                                                                                |
| tags=50%, list=37%, signal=33%  | Smarce1/Filii/Bptf/Xylt1/Chd7/Ube3b/Rad21/Ogt/Kmt2c/Php/Kat5a/Rere/Ube4b/Ep300/Rnf125/Chd1/Med13/Ankrd11/Son/Kras/Zeb2/Sptbn1/Ppp1r15b/Kmt2e/Ddx6/Crebbp/Herc1/Mef2c/Aff4/Smchd1/Ralgapa1/Pgap1/S      |
| tags=88%, list=37%, signal=55%  | Bptf/Hes6/Tmed2/Ldb1/Ep300/Ctnnb1/Pgap1                                                                                                                                                                |
| tags=62%, list=23%, signal=49%  | Ikfa/Dhx36/Cd84/Syk/Adgre5                                                                                                                                                                             |
| tags=75%, list=29%, signal=54%  | Tmem127/Stat4/Rnf6/Sh2b3/Ctnnb1/H2-Q7                                                                                                                                                                  |
| tags=100%, list=29%, signal=71% | Myc/Tspo/Bin1/Ilfat                                                                                                                                                                                    |
| tags=74%, list=38%, signal=48%  | Rps17/Rpl31/Rps26/Rpl18/Rps24/Rps20/Rps7/Rpl35/Rps27/Fam111a/Rpl15/Rps10/Rpl35a/Rps19/Rps28/Tonf/Fcgv/Taldo1/Pik3r1/Cy55a/Eif2s3x/Gd11/Ngly1                                                           |
| tags=31%, list=14%, signal=27%  | Fbxo38/Rfc1/Cf2/mt-Nd4/mt-Nd3/mt-Atp6/mt-Nd1/mt-Nd2/mt-Nd5/mt-Nd6/Wnk1                                                                                                                                 |
| tags=100%, list=0%, signal=100% | Wnk1                                                                                                                                                                                                   |
| tags=55%, list=24%, signal=42%  | Sbno2/Ikfa/Dock2/Cd84/Syk/Adgre5                                                                                                                                                                       |
| tags=75%, list=38%, signal=47%  | Apoe/Umjrd1c/Stat4/Irfgr1/H2-Q7/Malt1/Foxp1/Bach2/Birc3                                                                                                                                                |
| tags=36%, list=14%, signal=32%  | Son/Foxp1/Fbxo11/Zeb2/Ppp1r15b/Tcf4/Mef2c/Aff4/Trappc9                                                                                                                                                 |
| tags=67%, list=23%, signal=52%  | Ikfa/Cd84/Syk/Adgre5                                                                                                                                                                                   |
| tags=100%, list=36%, signal=64% | Rad21/Stat1/Minnp1/Rnf6                                                                                                                                                                                |
| tags=16%, list=3%, signal=16%   | Hspa1a/Hspa1b/Hsp90aa1/Capp                                                                                                                                                                            |
| tags=53%, list=23%, signal=41%  | Rc3h2/Ikfa/H2-Q7/Bcl6/Cd86/Ctcf/Pag1/Smad7/Wnk1                                                                                                                                                        |
| tags=12%, list=5%, signal=12%   | Hspa1a/Hspa8/Hspa1b/Fos/Nkx1/Myc/Piges3/Zfp38                                                                                                                                                          |
| tags=15%, list=4%, signal=15%   | Hspa1a/Hsp90aa1/Pmaip1/Chchd2/Myc/Gpx1/Timm8b/Hspd1                                                                                                                                                    |
| tags=75%, list=22%, signal=59%  | Bcl2/Camk2d/Wnk1                                                                                                                                                                                       |
| tags=21%, list=11%, signal=20%  | Sptbn1/Tcf4/mt-Nd4/Ganab/Crebbp/mt-Nd3/Setd2/mt-Atp6/mt-Nd1/mt-Co1/mt-Co3/mt-Nd2/mt-Co2/Satb1/mt-Nd5/mt-Nd6                                                                                            |
| tags=53%, list=37%, signal=34%  | Prkcb/Skt11/Hip3/Jak1/Map4k2/Sik2/Pik3r4/Eif2ak3/Csnk1d/Csnk1g3/Rlok1/Camk2d/Sik3b/Ikbb/Syk/Skt17b/Cik1/Smg1/Wnk1                                                                                      |
| tags=36%, list=23%, signal=36%  | Rc3h2/Ikfa/Bcl2/Prpjr/Rnf125/Cr11/Usp15/H2-Q7/Birc2/Mu1/Ikbf/Foxp1/Fbxo38/Matn3/Cd86/Cd84/Ctcf/Inpp5d/Crebbp/Artd5a/Ikbb/Syk/Mef2c/Pik3ap1/Birc3/Smad7/Pde4b/Trim25/Adgre5/Wnk1                        |
